# Supplementary material for: A memory transcriptome time course reveals essential long-term memory transcription factors.
Source: Research Square preprint supplement (doi:10.21203/rs.3.rs-5746840/v1), 2025-01-08
Supplement: Supplementary file 1 [file 3440300f4c69e6455840abfb.xlsx]

## Sheet: TIGs
Table S5 – List of TIGs with transcription factor binding within accessible regions of MB chromatin
Bound by two or more TFs (CrebB, sr, Hr38) (n=163)	CrebB-bound only (n=74)	sr-bound only (n=63)	Hr38-only (n=6)
CG11050	Sam-S	Coq8	Cen
SCaMC	lwr	sr	Treh
CAP	Pgk	coro	CG9815
CG3764	CG17221	Nt5c	Vps60
Tina-1	bark	Naprt	Moe
zfh1	CG3036	tim	AnxB10
CG9837	Kr-h1	Tsp42Ei
CG2865	CG9498	CG6006
Dp1	Dpp10	Cipc
Trp1	emb	dac
CG9399	CG13096	slow
Lpin	CG13124	Nsf2
ImpL2	CG4968	dia
edl	Hacd1	CG1628
CG9005	Vha68-2	eIF1A
Nuak	VhaSFD	CG12290
Pax	tup	CG15528
Atf3	Sidpn	Pfk
Fhos	Hr38	CG15186
by	mAcon1	jdp
CG5973	CG2201	Mlc2
aralar1	ap	CG46385
Baldspot	Fmo-2	dsx
sty	Tsp42Ee	Sod3
Drat	Tsp42Ef	ome
blw	Tsp42Eg	CG2082
CG43658	Aldh-III	Tudor-SN
Tab2	puml	Cpr
mol	rgr	wdp
Diap1	Lac	drm
CG17646	RpS15	FASN1
Ac78C	Sply	SP1029
cact	ACOX1	blot
Art3	insc	how
aop	CG10527	spg
CG5721	dnr1	Gk2
AdSS	ATPsynF	CG1265
Pdk1	ZnT63C	CG4577
btsz	Syx17	wmd
Cdc7	pst	egr
Sdb	Idh	CG44247
lbk	CG43078	svp
PCB	CG13315	Men
CG14762	RpS9	Pu
shn	LanB2	hlk
Dll	CG5151	fng
rau	Max	Syngr
Pka-C1	fbl	qm
Acsl	ZnT77C	CG11899
CG4733	CG32425	Ppcs
RpL17	BNIP3	CG7530
Sik3	Rcd2	flap
PRAS40	AcCoAS	Proc-R
CG5455	eIF3f1	CG9717
Zasp52	Dmtn	subdued
Ogdh	alpha-Est10	SerT
RpL31	foxo	CG5191
spin	Keap1	CG1648
kdn	cher	CG8500
Thor	l(3)05822	snu
nvy	Dl	Elovl7
CG43693	Irk1	tn
sbm	cnc	CG8180
MFS14	CHKov1
trc	CG7920
sdt	mod
raw	ATPsynbeta
Argk1	svr
CG4502	CG3842
srl	CG12065
CG31523	CG1640
Gga	r
Gpo1	baz
CG8547	Tak1
Nedd4
RpS19a
Tep3
NADK
fkh
CG12746
CG17834
Hsc70-4
AdamTS-B
cwo
Vha36-1
Pect
Apoltp
Idh3g
out
Eno
CG2004
GlyP
jeb
Traf4
Gpdh1
Sarm
Mrp4
CG44245
CG14894
FER
Hex-A
sNPF
Clk
Gclc
Gli
Hmgs
CG13185
CG8306
loco
RpS17
Pino
SREBP
pes
Pli
Myo31DF
CG13784
Dyro
Abcd3
Mmp1
plh
crb
Svil
CG5065
Acsf2
CG6225
tacc
CG14207
CG10737
h
nrv1
AnxB9
chb
bel
ry
CG3625
CG8034
Vha100-2
CG10947
Vinc
Rgl
Gdh
RpL29
Droj2
Sobp
Ccdc85
Ten-m
Arf1
Pisd
CG9338
Pde11
Agpat2
Nopp140
CG31038
CG18135
Rgk2
Ns2
S6k
Mtpalpha
uzip
CG32276
msk
puc
GILT1

## Sheet: Top 20 ABC Cluster genes
	Cluster A			Cluster B			Cluster C
	sr-bound only (n=4)	Hr38-bound only (n=1)	CrebB-bound only (n=3)	sr-bound only (n=1)	Hr38-bound only (n=1)	CrebB-bound on ly (n=2)	sr-bound only (n=10)	Hr38-bound only (n=1)	CrebB-boundonly (n=11)
	CG31145	CG31145	CG31145	lncRNA:CR44999	lncRNA:CR44999	CG7110	scrib	dnc	scrib
	Pde11		Pde11			lncRNA:CR44999	Gdap2		Gdap2
	Nplp1		Cad87A				pyd		pyd
	CG12290						sdt		sdt
							cpo		cpo
							mtd		Ten-a
							cora		mtd
							CG7378		sqd
							dnc		cora
							14-3-3zeta		dnc
									14-3-3zeta
genes with TF binding sites	5			2			11
genes with no binding sites	15			18			9
% genes with TF binding sites	25			10			55
