# Supplementary material for: A memory transcriptome time course reveals essential long-term memory transcription factors.
Source: Research Square preprint supplement (doi:10.21203/rs.3.rs-5746840/v1), 2025-01-08
Supplement: Supplementary file 2 [file 39f14f78b71455d25b1dbeea.xlsx]

## Sheet: 1h-DT WH TIG
	baseMean	log2FoldChange	lfcSE	stat	pvalue	padj
CG13428	538.31	3.12071	0.944725	3.30329	0.000955562	0.0242547
CG3348	157.701	2.4705	0.267239	9.24452	2.36298e-20	1.84601e-17
phu	842.639	2.42526	0.335271	7.23375	4.69852e-13	1.37647e-10
CG31324	3214.7	2.35525	0.14852	15.8581	1.23549e-56	8.68676e-53
Hr38	6533.7	2.30924	0.167469	13.789	2.96702e-43	1.04306e-39
Kah	422.378	2.23929	0.34429	6.50407	7.81768e-11	1.57046e-08
Act79B	2785.4	2.07431	0.627328	3.30658	0.000944437	0.0241243
CG11529	182.516	1.72469	0.255399	6.75294	1.44881e-11	3.39554e-09
edl	328.431	1.67284	0.212469	7.87333	3.45327e-15	1.42823e-12
TpnC41C	319.728	1.65874	0.498151	3.32979	0.000869101	0.0226597
CG3630	1054.12	1.65194	0.29921	5.52102	3.37028e-08	3.88466e-06
Obp19b	363.332	1.63394	0.411007	3.97545	7.02459e-05	0.00284532
Scp1	2574.58	1.61765	0.419939	3.8521	0.000117111	0.00442691
CG7720	5419.39	1.61271	0.261508	6.16694	6.9623e-10	1.19395e-07
sr	2816.41	1.59625	0.131134	12.1726	4.34916e-34	1.0193e-30
cwo	7668.58	1.51831	0.139309	10.8989	1.16694e-27	2.0512e-24
CG4461	627.634	1.46382	0.4409	3.32007	0.000899948	0.0231778
Mmp1	1855.36	1.43053	0.154699	9.24718	2.30503e-20	1.84601e-17
Nep7	383.078	1.37044	0.235611	5.81654	6.00797e-09	7.9702e-07
Sp1	789.405	1.33442	0.323101	4.13005	3.62691e-05	0.00165589
Mco1	180.823	1.31052	0.281417	4.65685	3.21087e-06	0.000205233
Cyp4d21	3573.38	1.2961	0.217897	5.94821	2.7109e-09	3.9599e-07
CG10345	3313.7	1.28584	0.187366	6.86273	6.75588e-12	1.63795e-09
Mlp60A	1500.15	1.26894	0.29703	4.2721	1.93645e-05	0.000992815
fbl	1927.82	1.26691	0.137641	9.20443	3.43492e-20	2.41509e-17
Act87E	1942.51	1.26099	0.391562	3.22041	0.00128009	0.0303041
fit	478.123	1.26063	0.334943	3.7637	0.000167415	0.00591505
su(r)	1676.15	1.25913	0.171459	7.34362	2.07887e-13	6.96026e-11
CG5023	1001.47	1.2366	0.374068	3.30582	0.000946992	0.0241243
CG9297	9181.82	1.23411	0.4179	2.95312	0.00314578	0.0574493
CG4213	235.956	1.22994	0.449986	2.73328	0.00627065	0.090718
CG14688	886.55	1.20941	0.187837	6.43858	1.20595e-10	2.17411e-08
CG15673	606.4	1.20905	0.196888	6.14081	8.21042e-10	1.37446e-07
dsx	6136.9	1.20903	0.215244	5.61703	1.94264e-08	2.31504e-06
CG6145	2390.82	1.19314	0.126317	9.44559	3.53393e-21	4.96942e-18
Mp20	2269.33	1.17334	0.2986	3.92948	8.51302e-05	0.00334291
MFS14	1587.85	1.15864	0.195652	5.92193	3.18183e-09	4.4743e-07
CG14401	182.947	1.15814	0.194717	5.94782	2.71737e-09	3.9599e-07
Thor	1612.55	1.12813	0.194403	5.80306	6.51147e-09	8.47818e-07
sug	645.407	1.12285	0.219377	5.11839	3.0816e-07	2.74262e-05
Kr-h1	5145.39	1.09701	0.12799	8.57106	1.02541e-17	5.54588e-15
CG11899	1003.62	1.09105	0.197848	5.51458	3.49612e-08	3.96471e-06
CG4945	222.139	1.07888	0.319432	3.37749	0.000731505	0.0197058
unc-4	150.682	1.06264	0.220649	4.81597	1.4649e-06	0.000106183
Zasp66	4330.34	1.06119	0.344856	3.07719	0.00208965	0.0428348
AQP	241.483	1.02577	0.358082	2.86463	0.00417501	0.0684254
PCB	17632.4	1.02123	0.123491	8.26968	1.34324e-16	6.2962e-14
Tsp42Ei	254.675	1.01364	0.222184	4.56215	5.06323e-06	0.000309562
CG5177	1046.06	1.00785	0.343306	2.9357	0.00332792	0.0596903
LKRSDH	1127.34	1.00458	0.137588	7.30134	2.84917e-13	8.70978e-11
SmydA-9	214.106	0.991826	0.362864	2.73333	0.00626974	0.090718
CG13912	207.673	0.990061	0.220236	4.49546	6.94192e-06	0.000406739
Fatp2	353.079	0.98686	0.198395	4.97423	6.55086e-07	5.29415e-05
CG14694	185.855	0.976685	0.2161	4.5196	6.1958e-06	0.000369175
CG6972	185.111	0.958208	0.254316	3.76779	0.000164702	0.00584859
CG5618	2489.25	0.95051	0.133707	7.1089	1.16969e-12	3.16311e-10
CG15096	4197.13	0.946142	0.189233	4.99987	5.73681e-07	4.74536e-05
Hsc70-1	488.454	0.939923	0.348621	2.69612	0.00701521	0.0969455
CG33970	7070.75	0.938461	0.144425	6.4979	8.14495e-11	1.59075e-08
SERCA	34520.4	0.937785	0.283245	3.31086	0.000930091	0.0238667
Cyp4e3	300.308	0.935867	0.237897	3.93393	8.35696e-05	0.0033103
daw	1682.99	0.934866	0.219618	4.25679	2.07385e-05	0.00104428
CG5909	163.787	0.930132	0.228916	4.0632	4.84038e-05	0.00206259
CG9451	407.608	0.924205	0.179273	5.15529	2.53241e-07	2.3338e-05
CG6175	900.928	0.922221	0.156003	5.91158	3.38847e-09	4.67144e-07
Mlc2	6626.92	0.913988	0.281557	3.24619	0.0011696	0.0284548
Neurochondrin	453.274	0.910615	0.333975	2.7266	0.00639913	0.0912622
CG5945	2320.07	0.909751	0.245506	3.70562	0.000210878	0.00712847
CG9498	1255.59	0.908599	0.142213	6.38899	1.66985e-10	2.93517e-08
CG9717	661.673	0.901433	0.171235	5.26429	1.40728e-07	1.434e-05
CG8745	1300.99	0.897948	0.121161	7.4112	1.25162e-13	4.40007e-11
puc	5026.9	0.892991	0.106749	8.3653	5.99603e-17	3.01129e-14
MFS9	394.654	0.89078	0.19243	4.6291	3.67254e-06	0.000232627
up	5246.48	0.889935	0.311159	2.86007	0.00423547	0.0690941
Lrt	233.248	0.887925	0.217256	4.08701	4.36972e-05	0.00189651
MME1	271.306	0.887844	0.165849	5.35333	8.63506e-08	9.34048e-06
tn	2478.04	0.887507	0.283111	3.13484	0.00171946	0.0370845
Wnt6	472.848	0.882914	0.214271	4.12054	3.77979e-05	0.00171456
h	2267.75	0.882069	0.177464	4.97042	6.68092e-07	5.33791e-05
CG12866	153.652	0.874506	0.311566	2.80681	0.00500353	0.07698
EbpIII	17781.4	0.87202	0.195982	4.44949	8.60763e-06	0.000484162
Prm	4273.39	0.863206	0.307772	2.80469	0.00503643	0.0773169
Gadd45	350.43	0.858733	0.305063	2.81494	0.00487867	0.0755548
Mes2	629.543	0.857275	0.198378	4.32143	1.55021e-05	0.000813397
l(2)01289	2434.01	0.855031	0.268369	3.18603	0.00144241	0.0327147
l(3)77CDf	2706.42	0.854062	0.0909975	9.38556	6.25855e-21	6.28626e-18
Tm2	3395.89	0.853881	0.28092	3.03958	0.00236906	0.0475909
CG1143	315.781	0.849042	0.234576	3.61947	0.000295209	0.0094777
r	1366.07	0.841138	0.130322	6.45431	1.08713e-10	2.06584e-08
CG3842	567.755	0.840927	0.161849	5.19576	2.03884e-07	1.93717e-05
CG7530	1688.12	0.830249	0.123805	6.70613	1.99859e-11	4.53293e-09
wupA	3676.86	0.817824	0.278243	2.93925	0.00329012	0.0591632
FipoQ	283.049	0.813969	0.293472	2.77358	0.0055443	0.0824143
Duox	425.459	0.811038	0.163923	4.94768	7.51015e-07	5.86709e-05
CG10237	3568.46	0.810568	0.14977	5.41209	6.22948e-08	6.84366e-06
CG5346	1088.96	0.807609	0.135653	5.95351	2.62448e-09	3.9599e-07
Mhc	33961.2	0.806541	0.288169	2.79884	0.00512863	0.0780506
Gpo1	3413.63	0.80616	0.121327	6.6445	3.04249e-11	6.68492e-09
CG9837	1607.05	0.804671	0.106766	7.53675	4.81829e-14	1.78302e-11
Asph	1119.73	0.803016	0.247175	3.24878	0.001159	0.0282948
CG5059	2866.07	0.80122	0.15405	5.20103	1.98182e-07	1.90879e-05
CG5104	183.522	0.800912	0.195435	4.09809	4.1657e-05	0.00184208
Mlc1	1869.32	0.796581	0.266513	2.9889	0.00279981	0.05423
Lsd-1	4093.53	0.792405	0.175778	4.50798	6.5448e-06	0.000386693
Ude	368.248	0.781832	0.229687	3.4039	0.000664313	0.0182818
Root	544.419	0.780541	0.226644	3.44391	0.000573369	0.0166585
spin	9899.52	0.777475	0.148279	5.24333	1.577e-07	1.56168e-05
CG1628	560.073	0.775602	0.1949	3.97948	6.90664e-05	0.00282329
cher	4574.58	0.768446	0.157423	4.88142	1.05322e-06	8.04912e-05
insc	365.673	0.767342	0.213497	3.59415	0.000325449	0.010401
Sp7	663.768	0.765913	0.172714	4.43458	9.22502e-06	0.000506727
CG13315	3178.66	0.763471	0.191145	3.99421	6.49108e-05	0.00268463
CG9572	1142.54	0.754734	0.275161	2.74288	0.00609021	0.0884717
CG7365	180.637	0.751224	0.240323	3.1259	0.00177265	0.0378829
PRAS40	2230.9	0.750856	0.0918056	8.17876	2.86789e-16	1.26026e-13
CG32032	400.591	0.749747	0.209058	3.58631	0.000335396	0.0106566
Esp	207.258	0.748993	0.20173	3.71286	0.000204931	0.00699452
ple	2233.25	0.745309	0.173527	4.29507	1.74639e-05	0.000902859
CG14661	1907.52	0.745252	0.166377	4.47929	7.48911e-06	0.000431606
CG12512	694.385	0.7432	0.148862	4.99254	5.95896e-07	4.8718e-05
CG5191	2905.55	0.735922	0.100347	7.33377	2.23767e-13	7.15139e-11
Hmgs	1517.89	0.734387	0.104516	7.02658	2.11663e-12	5.51186e-10
Ance-3	1312.16	0.729039	0.137986	5.28343	1.26787e-07	1.31094e-05
CG3036	9081.43	0.727277	0.160217	4.53931	5.64386e-06	0.000340581
Irk1	309.089	0.727025	0.206041	3.52855	0.00041784	0.0127179
CG2065	178.668	0.723081	0.231052	3.12952	0.00175092	0.0375326
CG5707	592.944	0.721008	0.173036	4.1668	3.08909e-05	0.00145768
dl	2957.21	0.712249	0.135933	5.23971	1.60825e-07	1.5705e-05
CG45076	1583.67	0.711407	0.264525	2.68938	0.00715859	0.0983048
CG8306	2144.86	0.705917	0.123167	5.73139	9.96117e-09	1.25066e-06
CG33110	1463.1	0.70357	0.222816	3.15762	0.00159061	0.0352793
CG5151	5355.43	0.697053	0.14628	4.76518	1.88682e-06	0.000130061
LUBEL	2784.06	0.695126	0.246655	2.81821	0.00482928	0.0752876
Irp-1B	2467.19	0.693985	0.13688	5.07002	3.97777e-07	3.4528e-05
Nep2	904.166	0.692514	0.139689	4.95754	7.13916e-07	5.63994e-05
plh	758.908	0.690924	0.216819	3.18664	0.00143936	0.0327147
Spn42Dd	708.194	0.685042	0.205095	3.34012	0.000837415	0.0221348
CG14439	1250.96	0.681737	0.144116	4.73048	2.23985e-06	0.000152897
ELOVL	3386.73	0.670225	0.143476	4.67135	2.99229e-06	0.000196624
ppl	1013.22	0.668815	0.15226	4.39259	1.12009e-05	0.000601173
CG11425	320.158	0.66368	0.183353	3.61969	0.000294955	0.0094777
CG11200	525.743	0.662905	0.178892	3.70561	0.000210883	0.00712847
CG9815	196.518	0.658227	0.22599	2.91263	0.00358398	0.0625284
Tsp42Eg	481.776	0.653473	0.159608	4.09424	4.23552e-05	0.00186125
Nha1	329.4	0.653441	0.207366	3.15115	0.00162631	0.0356217
Agpat2	417.444	0.650335	0.140883	4.61614	3.90946e-06	0.000243251
CG31121	648.031	0.650288	0.177467	3.66428	0.000248034	0.00814918
AcCoAS	19108.7	0.644338	0.0972879	6.623	3.51972e-11	7.49914e-09
CG14892	186.287	0.644167	0.217833	2.95715	0.00310495	0.0568513
CG5377	168.459	0.643552	0.217334	2.96112	0.00306523	0.0567148
CG42390	2849.57	0.643419	0.191053	3.36775	0.000757856	0.0202604
CG5973	3667.85	0.642502	0.151259	4.24768	2.15991e-05	0.00106946
lbm	324.233	0.638148	0.197851	3.22539	0.00125802	0.0299834
Tre1	164.961	0.637621	0.223651	2.85096	0.00435868	0.0701009
Fatp3	681.211	0.636095	0.178508	3.56339	0.000366091	0.011491
CG10026	458.258	0.635198	0.167877	3.78372	0.000154502	0.00554235
bgm	2783.19	0.634034	0.163332	3.88186	0.000103661	0.00398275
CG4733	783.774	0.630391	0.126014	5.00254	5.65796e-07	4.73584e-05
CG4199	1448.76	0.626682	0.14154	4.42758	9.52941e-06	0.00051939
CG4239	796.545	0.626239	0.216607	2.89114	0.00383853	0.0646854
Pgd	2451.82	0.623262	0.15144	4.11557	3.86224e-05	0.0017187
Ser	154.424	0.622901	0.202849	3.07076	0.00213518	0.0432635
Tep3	658.024	0.622261	0.123958	5.01992	5.16934e-07	4.37899e-05
FASN1	103502	0.620925	0.105567	5.88181	4.05808e-09	5.487e-07
Actn	4338.35	0.619008	0.208048	2.97531	0.0029269	0.0557697
snu	7502.44	0.617843	0.102119	6.05023	1.44639e-09	2.25991e-07
CG43658	7356.42	0.612444	0.0999682	6.12639	8.98953e-10	1.46989e-07
ZnT77C	365.734	0.611455	0.114891	5.32205	1.02605e-07	1.08876e-05
CG10512	975.958	0.60752	0.114195	5.32003	1.0375e-07	1.08876e-05
Obp56d	3331.51	0.606189	0.185391	3.26979	0.00107626	0.0267391
CG17278	537.884	0.605052	0.215937	2.80198	0.00507898	0.0774627
CG10621	1677.41	0.600876	0.2179	2.75758	0.00582311	0.0856533
CG8399	1178.4	0.600326	0.180462	3.3266	0.000879123	0.0228085
metl	169.299	0.59956	0.20052	2.99003	0.00278954	0.0541803
CG3764	3526.2	0.59798	0.0837856	7.13702	9.53729e-13	2.68227e-10
Mocs1	719.097	0.59776	0.100543	5.94529	2.75971e-09	3.9599e-07
Grik	369.106	0.593527	0.198063	2.99666	0.0027295	0.0534572
Sobp	508.053	0.592629	0.174013	3.40565	0.000660059	0.0182711
CG31886	455.851	0.592274	0.157141	3.76906	0.000163864	0.00584835
Mgstl	825.837	0.59001	0.175946	3.35336	0.000798363	0.0212625
zfh1	2755.55	0.582747	0.12144	4.79863	1.59751e-06	0.000113456
Sidpn	600.86	0.58127	0.134062	4.33584	1.45203e-05	0.000767611
blot	2108.69	0.577294	0.103141	5.59711	2.17956e-08	2.55408e-06
CG17221	282.755	0.575976	0.160941	3.57879	0.000345185	0.0108834
CG10348	444.825	0.572609	0.191314	2.99303	0.00276224	0.0539147
spirit	286.45	0.571493	0.196455	2.90903	0.00362549	0.062759
Pmp70	4991.49	0.56744	0.0981179	5.78324	7.32736e-09	9.36704e-07
AnxB9	3020.91	0.562963	0.116399	4.83651	1.32138e-06	9.7796e-05
CG9812	2538.56	0.562345	0.145155	3.87409	0.000107023	0.00408956
CG7724	466.566	0.560979	0.16849	3.32945	0.000870163	0.0226597
yellow-c	315.568	0.558985	0.19611	2.85036	0.00436697	0.0701009
CG14186	6117.93	0.556156	0.0918132	6.05747	1.38282e-09	2.20968e-07
Myo31DF	1343.06	0.555562	0.118801	4.6764	2.9196e-06	0.000195502
CG7560	211.336	0.55254	0.204003	2.70849	0.006759	0.0946663
CG1674	2324.21	0.551604	0.194757	2.83226	0.00462196	0.0730269
CG12814	1598.63	0.551443	0.114378	4.82124	1.42665e-06	0.000104487
NimB2	1969.89	0.549102	0.197564	2.77936	0.00544656	0.0816967
bon	4957.18	0.548978	0.0583393	9.41008	4.95744e-21	5.80929e-18
Dll	1552.12	0.547558	0.187418	2.92159	0.00348249	0.0616761
CG9436	1282.5	0.540222	0.154289	3.50136	0.000462889	0.0139297
LanB2	1040.14	0.539775	0.1445	3.73547	0.000187362	0.00658672
Usp1	3056.04	0.538005	0.0826083	6.51273	7.37986e-11	1.52611e-08
CG10352	204.536	0.536302	0.1918	2.79616	0.00517144	0.0785321
SdhC	1079.2	0.533842	0.194103	2.7503	0.00595414	0.0872832
CG11241	728.653	0.533484	0.135084	3.94929	7.83849e-05	0.00314928
slow	551.724	0.530825	0.152586	3.47885	0.000503567	0.0150024
CG5009	2011.53	0.530543	0.125014	4.24387	2.19694e-05	0.00108019
meso18E	332.879	0.529815	0.18907	2.80222	0.00507528	0.0774627
Cyp4e1	206.619	0.529742	0.182503	2.90265	0.00370024	0.0635892
bark	1382.69	0.527056	0.114988	4.58357	4.57107e-06	0.000281923
ACC	45207.5	0.523584	0.157454	3.32531	0.00088321	0.0228303
Mrp4	1183.57	0.523334	0.124618	4.19951	2.67494e-05	0.00128818
Cpr67B	1907.44	0.523292	0.153159	3.41665	0.000633971	0.0178298
CG1441	1012.85	0.523075	0.176452	2.96441	0.00303269	0.0562794
fng	1761.15	0.522635	0.124635	4.19332	2.749e-05	0.00131484
CG13794	496.839	0.520426	0.182041	2.85883	0.00425204	0.069204
CG9485	2955.53	0.516607	0.179961	2.87067	0.00409609	0.0676047
CG4374	715.716	0.51456	0.174709	2.94525	0.00322696	0.0581762
CG6201	398.834	0.513502	0.172184	2.98229	0.00286101	0.0548114
CG4797	601.888	0.510339	0.172031	2.96656	0.00301155	0.0562794
CG7778	1255	0.505598	0.127198	3.97488	7.04148e-05	0.00284532
wdp	2603.8	0.503694	0.13179	3.82196	0.000132397	0.00487373
b	1197.15	0.503473	0.181204	2.77849	0.00546116	0.0816967
CG14207	3402.88	0.492696	0.095603	5.15356	2.55587e-07	2.3338e-05
CG15279	377.215	0.492012	0.168013	2.92842	0.00340692	0.0607972
kon	978.266	0.490982	0.122993	3.99196	6.55298e-05	0.00269439
GstD1	3877.77	0.488855	0.114857	4.2562	2.07934e-05	0.00104428
CG17919	559.551	0.486967	0.172952	2.81562	0.00486831	0.0755548
sev	3306.84	0.48651	0.127644	3.81146	0.000138149	0.00505899
cact	5668.75	0.485324	0.0896186	5.41543	6.11405e-08	6.82348e-06
Mdr49	1500.22	0.477508	0.15134	3.15521	0.00160385	0.0354611
Ugt302C1	746.004	0.475431	0.151028	3.14797	0.00164408	0.0358541
Lgr1	1201.19	0.471764	0.137728	3.42534	0.000614033	0.0175265
Men	16159.1	0.470978	0.0937886	5.02169	5.12181e-07	4.37899e-05
CG1572	751.12	0.469243	0.165128	2.84168	0.00448763	0.0717103
puml	1813.2	0.468507	0.0967963	4.84013	1.29754e-06	9.70535e-05
D2hgdh	4427.69	0.468138	0.137217	3.41165	0.000645715	0.0180877
mol	578.414	0.46474	0.144284	3.221	0.00127745	0.0303041
cathD	5998.28	0.463612	0.160512	2.88833	0.00387294	0.0648102
AnxB10	1304.17	0.463566	0.156159	2.96854	0.00299217	0.0562794
CG43693	1838.71	0.460141	0.1247	3.68997	0.000224284	0.00750923
pain	1178.34	0.459232	0.133967	3.42795	0.000608153	0.0175243
GILT1	1053.68	0.450141	0.118242	3.80695	0.000140693	0.00512547
Tsp42Ef	664.886	0.448943	0.130512	3.43987	0.000582004	0.0168398
AdSS	2188.1	0.445037	0.106448	4.18081	2.90474e-05	0.00137995
Clk	2667.25	0.439295	0.148859	2.95109	0.00316658	0.0575366
CG10527	938.424	0.434438	0.12765	3.40335	0.000665644	0.0182818
CG40006	6368.45	0.434297	0.162214	2.67731	0.00742157	0.0992035
kraken	705.64	0.433121	0.145917	2.96827	0.00299481	0.0562794
ry	1799.69	0.432486	0.14371	3.00944	0.00261728	0.0516912
CAH2	1745.26	0.432283	0.158438	2.7284	0.00636433	0.0912521
CG10550	1977.5	0.432215	0.107763	4.0108	6.05132e-05	0.00251756
loco	1293.6	0.431447	0.0889831	4.84863	1.24314e-06	9.39842e-05
Cpr	5842.07	0.430802	0.121751	3.53839	0.000402571	0.0124691
CG2865	3422.65	0.428797	0.11502	3.72802	0.000192993	0.00670343
cv-2	1809.36	0.425794	0.153317	2.77721	0.00548271	0.0818448
rictor	2638.1	0.425555	0.0910689	4.67289	2.96994e-06	0.000196624
scyl	12488.5	0.419814	0.125661	3.34085	0.000835236	0.0221348
DOR	9192.82	0.417161	0.0939358	4.44091	8.95777e-06	0.000499858
CG10947	2492.11	0.41655	0.12991	3.20646	0.0013438	0.0313897
Argk	31269.6	0.414194	0.117179	3.53472	0.000408211	0.0125883
Pex5	874.439	0.412743	0.130437	3.16432	0.00155444	0.0348066
vir-1	9704.19	0.412603	0.116886	3.52997	0.000415614	0.0127051
raw	5089.13	0.411581	0.0807176	5.09902	3.41412e-07	3.00058e-05
Sugb	592.362	0.410554	0.12664	3.2419	0.00118737	0.028756
Gpdh1	10888.6	0.408242	0.10989	3.715	0.0002032	0.00696926
CG7115	1387.36	0.407101	0.103502	3.93325	8.3805e-05	0.0033103
pot	1531.56	0.406589	0.127574	3.18707	0.0014372	0.0327147
gukh	2469.59	0.403416	0.118727	3.39785	0.000679178	0.0185809
wat	9187.01	0.403411	0.150514	2.68023	0.00735726	0.0991906
coro	2656.87	0.403341	0.118352	3.40798	0.000654458	0.0181877
c12.2	1035.37	0.403186	0.121055	3.33059	0.000866625	0.0226597
Jra	850.394	0.403087	0.0998562	4.03668	5.42135e-05	0.00228248
rdog	1566.11	0.399699	0.136781	2.92219	0.00347577	0.0616761
CG8008	784.74	0.399015	0.126575	3.1524	0.00161937	0.0356217
egr	512.722	0.398712	0.12921	3.08577	0.00203024	0.041861
CG6701	1785.96	0.397708	0.139736	2.84614	0.00442521	0.070874
Pisd	2887.08	0.397338	0.144752	2.74496	0.00605189	0.0880969
emp	7384.67	0.392591	0.127463	3.08004	0.00206976	0.0425511
kdn	12179.3	0.392257	0.0953	4.11603	3.8546e-05	0.0017187
CG14830	587.709	0.390274	0.143711	2.71568	0.0066139	0.0930047
CG8036	6876.58	0.389514	0.133439	2.91903	0.00351121	0.0617893
Vha100-2	2449.14	0.388912	0.133633	2.91029	0.00361093	0.0626912
CG17111	1765.75	0.388869	0.115462	3.36793	0.000757346	0.0202604
Snp	1108.03	0.388213	0.0936874	4.14371	3.41728e-05	0.00157039
Spg7	980.27	0.383175	0.134335	2.85238	0.00433935	0.0701009
krz	2551.34	0.382063	0.0908652	4.20472	2.61404e-05	0.00126754
Reg-5	1501.36	0.380061	0.120154	3.16312	0.00156087	0.0348395
ScpX	1536.78	0.379156	0.127895	2.96459	0.00303086	0.0562794
mAcon1	14864.1	0.378971	0.138974	2.72692	0.00639281	0.0912622
CG6236	595.514	0.378228	0.132645	2.85142	0.00435241	0.0701009
CG9336	2610.56	0.377414	0.140106	2.69376	0.00706501	0.0974002
Tep4	7511.08	0.377183	0.13919	2.70984	0.0067315	0.0944694
MTF-1	1377.51	0.376723	0.0886634	4.24892	2.14807e-05	0.00106946
Mvl	1990.27	0.376213	0.0905334	4.15551	3.2456e-05	0.00152132
betaTub97EF	1970.79	0.375669	0.119804	3.1357	0.00171446	0.0370845
Atf3	5821.57	0.373581	0.0951023	3.92821	8.55814e-05	0.00334291
poly	356.812	0.372115	0.128853	2.88791	0.00387808	0.0648102
sty	5718.5	0.371339	0.100893	3.68053	0.000232747	0.00771907
AOX3	3092.61	0.370777	0.10844	3.41917	0.000628118	0.0178032
CG7920	9723.27	0.368624	0.101275	3.63985	0.000272798	0.00887984
Picot	2326.57	0.368023	0.0886602	4.15094	3.31111e-05	0.00154076
CG9005	7061.23	0.367717	0.0717052	5.12818	2.9256e-07	2.63716e-05
AANAT1	4289.68	0.366314	0.0807138	4.53843	5.66748e-06	0.000340581
MESR3	4887.42	0.365723	0.107793	3.39283	0.000691758	0.0187888
meng	1933.38	0.363557	0.114975	3.16206	0.00156659	0.0348567
l(2)k01209	1240.39	0.363209	0.106537	3.40924	0.000651446	0.0181759
Gclc	3736.27	0.362586	0.0758151	4.7825	1.73129e-06	0.000121727
CCT7	724.925	0.361064	0.114572	3.15142	0.00162479	0.0356217
SCaMC	6039.65	0.360904	0.0869737	4.14958	3.33091e-05	0.00154076
Sply	1069.19	0.359752	0.11275	3.19072	0.00141919	0.0326089
Sccpdh1	4220.63	0.357325	0.110328	3.23874	0.00120059	0.0289088
Xrp1	18816.8	0.356699	0.0865988	4.11898	3.80551e-05	0.00171516
tnc	2492.18	0.354952	0.109129	3.25258	0.00114363	0.0282136
SerT	1073.07	0.351921	0.124713	2.82185	0.0047747	0.0747682
prage	6774.63	0.350133	0.130659	2.67975	0.00736764	0.0991906
Trxr-1	3140	0.350132	0.117944	2.96864	0.00299121	0.0562794
AnxB11	1003.23	0.348035	0.106192	3.27741	0.00104764	0.0261203
Dic1	1508.33	0.347741	0.0783852	4.4363	9.15169e-06	0.000506658
CG11050	2916.75	0.343736	0.0736352	4.6681	3.03999e-06	0.000197909
Pect	4242.1	0.343653	0.0719576	4.77577	1.79022e-06	0.000124624
Dip-C	602.24	0.343281	0.118323	2.90122	0.00371713	0.0635892
Treh	7050.67	0.34303	0.106709	3.21463	0.00130612	0.0308158
Gfat1	1890.62	0.34279	0.0922611	3.71543	0.000202858	0.00696926
CG32425	4684.22	0.341506	0.091623	3.7273	0.000193542	0.00670343
Mtpalpha	3247.52	0.34091	0.111383	3.06071	0.0022081	0.0444847
Idh	11028.3	0.335016	0.112145	2.98734	0.00281419	0.0543587
CG4577	16135.9	0.332143	0.0955688	3.47544	0.000510026	0.0151308
UQCR-C1	7995.15	0.331578	0.108046	3.06887	0.00214873	0.043413
Tmem63	1584.09	0.329211	0.101912	3.23036	0.00123636	0.0295675
cv-c	13236.8	0.328145	0.0855634	3.83511	0.000125508	0.00466902
pes	1345	0.327857	0.113536	2.8877	0.00388069	0.0648102
CLIP-190	10478.4	0.327326	0.0889058	3.68171	0.000231671	0.00771907
GlyP	12058.4	0.325555	0.112627	2.89056	0.00384561	0.0646854
CG32369	5499.23	0.321606	0.100779	3.19121	0.00141676	0.0326089
ND-49	3359.73	0.315432	0.101839	3.09737	0.00195249	0.0405751
CG31694	3021.4	0.314212	0.100951	3.11252	0.00185495	0.0392577
Ubi-p63E	3343.99	0.311327	0.107044	2.90839	0.0036329	0.062759
Rpn9	791.483	0.311299	0.115055	2.70565	0.00681715	0.095102
Aldh-III	5309.77	0.308579	0.078849	3.91355	9.09491e-05	0.00351353
RhoGAP15B	1310.15	0.30707	0.109251	2.81069	0.00494356	0.0763579
Pino	7767.53	0.306961	0.114221	2.68744	0.00720026	0.0986843
CTPsyn	1033.97	0.304176	0.088821	3.4246	0.000615707	0.0175265
CG9399	1533.04	0.29989	0.103334	2.90215	0.00370615	0.0635892
NKCC	2776.44	0.297041	0.103745	2.86319	0.00419398	0.0685764
ine	1892.24	0.296608	0.0953432	3.11095	0.00186489	0.0392577
CG1648	4825.12	0.293021	0.0878216	3.33655	0.000848258	0.0223375
Lac	2374.41	0.292452	0.089223	3.27777	0.00104632	0.0261203
Hsc70-4	29235.2	0.29185	0.091999	3.17232	0.00151225	0.03397
Pvr	2571.03	0.290157	0.102945	2.81855	0.00482406	0.0752876
CG8839	1525.27	0.289228	0.107762	2.68395	0.00727569	0.0991906
Chc	10347.2	0.289104	0.0926988	3.11874	0.00181626	0.0386973
Inos	6236.25	0.286994	0.0885449	3.24123	0.00119016	0.028756
bur	2163.79	0.28638	0.0655497	4.3689	1.24875e-05	0.000665147
S6k	3867.18	0.282083	0.0886246	3.1829	0.00145807	0.0328579
CG10737	7470.51	0.281653	0.0943682	2.98462	0.00283931	0.0546936
Vinc	3087.34	0.281479	0.0929933	3.02688	0.00247095	0.0493559
ATPCL	14437	0.281378	0.0908801	3.09614	0.00196055	0.0405751
ALiX	2632.48	0.277677	0.0938127	2.95991	0.00307727	0.0567881
CG44247	10612.1	0.265443	0.0972589	2.72924	0.00634808	0.0912521
subdued	1556.94	0.265002	0.0937501	2.82669	0.00470319	0.0741438
Usp32	4813.85	0.263776	0.0884182	2.98327	0.00285184	0.054785
oys	4493.33	0.26263	0.0609568	4.30847	1.6439e-05	0.000856168
Sik3	4590.95	0.255618	0.0797144	3.20667	0.00134281	0.0313897
bel	7264.14	0.255161	0.0530675	4.80824	1.52265e-06	0.000109242
Pura	3727.59	0.253801	0.0894258	2.83811	0.00453812	0.072171
lbk	3143.25	0.250374	0.0854208	2.93107	0.00337798	0.060434
Eno	15271	0.24999	0.0897854	2.78431	0.00536416	0.0811084
Dp1	8616.21	0.249382	0.0658313	3.7882	0.000151744	0.00547134
muc	3946.68	0.246886	0.0846537	2.91642	0.00354072	0.0620818
Letm1	4434.13	0.246421	0.077118	3.19537	0.0013965	0.0322986
PyK	14543.1	0.245659	0.0869546	2.82515	0.00472592	0.0741695
CG1607	4109.22	0.245429	0.0915539	2.68071	0.00734662	0.0991906
shn	9983.37	0.243894	0.0886875	2.75004	0.00595875	0.0872832
Diap1	6642.67	0.239241	0.0826097	2.89604	0.00377903	0.0644486
Sec63	1265.61	0.23911	0.0826092	2.89447	0.00379793	0.0645006
plx	10735.3	0.238873	0.0805831	2.9643	0.0030337	0.0562794
RasGAP1	4065.57	0.232324	0.080308	2.89291	0.00381686	0.0645971
CG7120	1661.47	0.229591	0.0842873	2.72391	0.0064514	0.0915741
Dlg5	4099.18	0.226948	0.0791808	2.8662	0.00415427	0.0682445
CG31729	6706.53	0.226463	0.0670347	3.37829	0.000729383	0.0197058
CG2201	3339.48	0.224589	0.0713561	3.14743	0.00164712	0.0358541
Map205	5170.89	0.224146	0.064795	3.45931	0.000541558	0.0157995
CG9674	32975.2	0.222705	0.078466	2.83824	0.00453632	0.072171
sws	4716.07	0.222604	0.062085	3.58547	0.000336477	0.0106566
cdm	2677.2	0.221926	0.0814865	2.72347	0.00646007	0.0915741
Drat	4771.76	0.22087	0.0600548	3.6778	0.000235252	0.00776553
CG8485	3075.06	0.219602	0.078368	2.80219	0.00507571	0.0774627
ZnT63C	2479.63	0.216328	0.0807798	2.67799	0.00740649	0.0991906
Mctp	2582.24	0.214454	0.0713517	3.0056	0.00265062	0.0520572
Pdk1	9749.64	0.21444	0.0627357	3.41815	0.000630494	0.0178032
Hsf	1902.65	0.213637	0.0725196	2.94593	0.00321988	0.0581762
fry	12643.3	0.210255	0.0770737	2.72797	0.00637246	0.0912521
egl	3219.89	0.208107	0.0699744	2.97405	0.002939	0.055849
CG42672	4595.51	0.205045	0.0598721	3.42471	0.00061546	0.0175265
msk	2275.9	0.204619	0.0748886	2.73231	0.00628921	0.0907997
Vps13	5324.42	0.203096	0.0526179	3.85983	0.000113467	0.00431235
ClC-c	3073.58	0.199458	0.0744178	2.68024	0.00735694	0.0991906
Klp98A	3463.39	0.191853	0.0588158	3.26192	0.00110659	0.0273958
Atg1	5256.5	0.174113	0.0643941	2.70387	0.00685375	0.0954233

## Sheet: 1h-DT WH TRG
	baseMean	log2FoldChange	lfcSE	stat	pvalue	padj
CG1979	378.995	-2.19953	0.467941	-4.70043	2.59608e-06	0.00017551
dsb	4315.79	-2.06558	0.240255	-8.59744	8.15174e-18	4.77624e-15
CG5966	1529.32	-1.75771	0.252954	-6.94874	3.68574e-12	9.25517e-10
comm2	637.487	-1.55964	0.174224	-8.95195	3.49273e-19	2.23249e-16
CG11426	822.651	-1.26558	0.446025	-2.83747	0.00454726	0.072171
Ugt35C1	414.964	-1.22581	0.216973	-5.64958	1.60838e-08	1.98395e-06
bmm	3377.52	-1.17546	0.151478	-7.75996	8.49581e-15	3.31856e-12
CG34330	232.731	-1.16379	0.249544	-4.66368	3.10604e-06	0.000200354
CG10516	949.899	-1.12673	0.199945	-5.63519	1.74865e-08	2.11978e-06
CG30431	887.691	-1.08548	0.243698	-4.4542	8.42062e-06	0.000477463
hh	139.558	-1.06619	0.249653	-4.2707	1.94863e-05	0.000992815
comm3	748.584	-1.06081	0.164593	-6.44504	1.15572e-10	2.1384e-08
Lst	1005.95	-0.981403	0.275717	-3.55945	0.000371625	0.0116129
CG18302	361.499	-0.931656	0.201458	-4.62456	3.754e-06	0.000235664
CG8665	2082.08	-0.860703	0.174165	-4.94189	7.73693e-07	5.97784e-05
Cpr76Bc	421.04	-0.752239	0.212154	-3.54573	0.00039153	0.0121807
Lip4	393.048	-0.742874	0.193499	-3.83916	0.000123457	0.00461716
CG16758	12378.9	-0.738431	0.230819	-3.19918	0.00137819	0.0319804
CG6511	512.848	-0.691971	0.133835	-5.17032	2.33688e-07	2.19074e-05
JhI-21	765.542	-0.676424	0.206006	-3.28352	0.00102518	0.0257429
Gbs-70E	7375.59	-0.672038	0.150296	-4.47143	7.7698e-06	0.000444142
del	176.175	-0.67201	0.21473	-3.12956	0.00175067	0.0375326
CG31102	234.112	-0.638522	0.188206	-3.39268	0.000692121	0.0187888
ImpE1	140.931	-0.637676	0.226403	-2.81656	0.00485417	0.0755081
Cpn	5087.57	-0.631329	0.216161	-2.92064	0.00349308	0.0617082
CG2906	175.352	-0.62496	0.192273	-3.25038	0.00115252	0.0282348
CG10343	150.606	-0.622084	0.224239	-2.77419	0.00553385	0.0824143
CG31431	143.666	-0.610823	0.202581	-3.01521	0.00256801	0.0511492
CG34376	3172.25	-0.597224	0.170589	-3.50095	0.000463598	0.0139297
CG6013	342.412	-0.58094	0.167512	-3.46804	0.000524267	0.0153589
cyp33	156.36	-0.574524	0.193276	-2.97256	0.00295327	0.0559689
CG43331	241.613	-0.562538	0.201901	-2.78621	0.00533291	0.0808096
Rad17	152.446	-0.561741	0.204552	-2.7462	0.00602903	0.0879462
CG9747	1018.21	-0.561738	0.142388	-3.94512	7.97593e-05	0.00318629
CCHa1	148.305	-0.559726	0.193989	-2.88535	0.00390974	0.0651408
Dfd	1373.25	-0.550567	0.140295	-3.92435	8.69636e-05	0.00337813
IRSp53	4033.01	-0.528199	0.129167	-4.08928	4.32721e-05	0.00188973
BORCS6	172.861	-0.52258	0.183018	-2.85535	0.00429889	0.0696439
GIIIspla2	569.601	-0.521573	0.179753	-2.9016	0.00371257	0.0635892
alpha-Est8	2732.76	-0.512898	0.121567	-4.21906	2.45319e-05	0.00119781
PGRP-LE	343.749	-0.500201	0.13798	-3.62516	0.000288781	0.00935677
HIP	451.032	-0.486441	0.179056	-2.71669	0.00659379	0.0929861
CARPB	4781.2	-0.469542	0.116445	-4.03232	5.52281e-05	0.00231136
D12	294.6	-0.465285	0.157667	-2.95105	0.00316693	0.0575366
CG3386	252.873	-0.459154	0.160178	-2.86653	0.00415004	0.0682445
Cnx99A	6193.81	-0.444585	0.121999	-3.64417	0.000268258	0.00877265
Sirt7	325.584	-0.44421	0.135198	-3.28563	0.00101756	0.0256431
CG9380	1130.23	-0.439499	0.148595	-2.95769	0.00309951	0.0568513
Charon	340.525	-0.43572	0.14074	-3.09591	0.0019621	0.0405751
thoc7	279.356	-0.43063	0.154737	-2.78298	0.00538625	0.0812677
CG3631	305.347	-0.425518	0.141448	-3.00829	0.00262719	0.0517417
LysRS	1543.82	-0.424433	0.122377	-3.46824	0.000523876	0.0153589
Sema5c	846.678	-0.419407	0.109539	-3.82882	0.000128758	0.00476474
UbcE2M	469.848	-0.413723	0.128738	-3.21368	0.00131047	0.0308158
CG3407	255.459	-0.413614	0.13463	-3.07222	0.0021247	0.0432635
lili	545.038	-0.413499	0.137376	-3.00998	0.00261267	0.0516912
Hr4	1178.51	-0.407283	0.130884	-3.11178	0.0018596	0.0392577
CG10809	491.565	-0.402607	0.136132	-2.95748	0.00310161	0.0568513
Sec22	1067.35	-0.399045	0.10781	-3.70136	0.000214445	0.00721419
CG10055	590.058	-0.398407	0.103727	-3.84092	0.000122573	0.0046086
MED15	564.616	-0.395237	0.120257	-3.28661	0.00101401	0.0256431
CG13784	8741.89	-0.394036	0.0750625	-5.24943	1.52567e-07	1.53243e-05
spag	301.53	-0.386455	0.138931	-2.78163	0.00540864	0.0814308
CG17124	5043.39	-0.384716	0.122534	-3.13968	0.00169134	0.0367031
Parg	393.514	-0.379731	0.141086	-2.69148	0.00711367	0.0978791
Naa20A	419.516	-0.377611	0.122869	-3.07327	0.00211724	0.0432635
SCCRO3	529.753	-0.376817	0.129346	-2.91325	0.00357689	0.0625284
CG16972	1571.51	-0.36194	0.130666	-2.76997	0.00560618	0.0829832
mbf1	1666.8	-0.361212	0.116346	-3.10463	0.00190516	0.0398665
Plp	6522.43	-0.359924	0.0814301	-4.42004	9.86815e-06	0.000533715
CG13197	756.216	-0.35786	0.118873	-3.01045	0.00260863	0.0516912
px	16636	-0.353698	0.0875407	-4.04039	5.33625e-05	0.00226019
Paip2	1958.23	-0.351147	0.0941768	-3.72859	0.000192551	0.00670343
Su(var)3-3	614.475	-0.351086	0.114331	-3.07079	0.00213492	0.0432635
18w	3637.36	-0.350854	0.0993112	-3.53288	0.000411062	0.0126209
bru1	11338	-0.347133	0.120644	-2.87734	0.00401049	0.0665181
DnaJ-1	3216.38	-0.34147	0.0839086	-4.06955	4.71037e-05	0.00201943
KdelR	1307.52	-0.340012	0.122346	-2.77909	0.00545111	0.0816967
CG8765	757.392	-0.337153	0.105789	-3.18704	0.00143738	0.0327147
CG17321	2207.96	-0.334209	0.103301	-3.23529	0.00121519	0.0291603
Hrs	2008.77	-0.332293	0.0876513	-3.79107	0.000149998	0.00543625
CG4660	898.756	-0.33148	0.1139	-2.91027	0.00361114	0.0626912
CG3726	1947.24	-0.31776	0.102132	-3.11127	0.00186284	0.0392577
hth	26261.6	-0.315915	0.117926	-2.67893	0.00738582	0.0991906
kuk	1557.58	-0.313722	0.0985515	-3.18333	0.00145591	0.0328579
jim	36545	-0.306598	0.113724	-2.69598	0.00701824	0.0969455
qless	838.088	-0.305078	0.103471	-2.94844	0.00319382	0.0578757
EDTP	3011.94	-0.302612	0.0974681	-3.10473	0.00190452	0.0398665
fs(2)ltoPP43	541.021	-0.29426	0.109025	-2.69901	0.0069546	0.0964453
CG9636	1785.17	-0.291318	0.105234	-2.76828	0.00563529	0.0832389
CG12316	960.453	-0.285355	0.100989	-2.82561	0.004719	0.0741695
Sulf1	3542.77	-0.284879	0.0698624	-4.07772	4.54802e-05	0.00196179
not	693.169	-0.2831	0.0968634	-2.92267	0.0034704	0.0616761
wech	3733.61	-0.28231	0.0981571	-2.87611	0.00402614	0.0666065
pros	94900	-0.274693	0.101482	-2.70682	0.00679313	0.0949553
Tace	1214.11	-0.272889	0.102014	-2.675	0.00747285	0.0996995
Yip1d1	794.989	-0.27197	0.101423	-2.68155	0.00732818	0.0991906
CG42324	8415.87	-0.27138	0.0943185	-2.87727	0.00401133	0.0665181
CG9164	1164.54	-0.267636	0.099133	-2.69976	0.0069389	0.0964178
Sfmbt	1456.94	-0.267423	0.0769772	-3.47405	0.000512663	0.0151451
Akap200	4460.5	-0.266404	0.0759396	-3.5081	0.000451317	0.0136776
stau	7953.37	-0.265391	0.0874243	-3.03566	0.0024001	0.0480771
LpR2	5642.52	-0.263539	0.0967274	-2.72455	0.00643893	0.0915741
CG8155	1250	-0.259198	0.0895179	-2.89549	0.0037857	0.0644486
Myo95E	2429.7	-0.253896	0.0781126	-3.25038	0.0011525	0.0282348
CG2818	926.129	-0.249444	0.0929671	-2.68315	0.00729325	0.0991906
smg	3372.01	-0.246329	0.0548285	-4.49271	7.03211e-06	0.000408618
Ppa	1880.32	-0.244447	0.0889344	-2.74862	0.00598469	0.087481
capu	3692.21	-0.244307	0.0844625	-2.89249	0.00382199	0.0645971
CG6923	2386.25	-0.242527	0.090415	-2.68238	0.00731012	0.0991906
fz2	12479.1	-0.239204	0.0851221	-2.81012	0.00495224	0.0763579
Sdc	21691.8	-0.238548	0.0878175	-2.71641	0.00659935	0.0929861
Atg13	1563.95	-0.232457	0.084163	-2.76198	0.00574512	0.0846834
CG42788	11992.1	-0.229746	0.0659408	-3.48413	0.000493741	0.0147723
C1GalTA	1548.36	-0.2266	0.084359	-2.68613	0.00722842	0.0988774
Blimp-1	9908.77	-0.222047	0.0782763	-2.83671	0.00455816	0.0721811
wde	2521.09	-0.216347	0.0780387	-2.77231	0.00556608	0.0825636
CG9170	5294.95	-0.214843	0.0787473	-2.72826	0.00636693	0.0912521
cindr	6287.28	-0.212708	0.0663684	-3.20495	0.00135084	0.0314495
Hrb98DE	6347.54	-0.210023	0.0676866	-3.10287	0.00191656	0.0399862
Afti	2548.16	-0.183976	0.0675994	-2.72156	0.00649753	0.0919197
Mtor	3023.96	-0.180888	0.0633223	-2.85662	0.00428178	0.069527
rin	7120.68	-0.179046	0.0668542	-2.67815	0.00740305	0.0991906
qtc	4126.68	-0.177566	0.0608378	-2.91867	0.00351525	0.0617893
CG4297	2936.95	-0.177213	0.0597241	-2.96718	0.00300541	0.0562794
CG31635	9795.47	-0.16764	0.0563139	-2.97689	0.00291187	0.0556341

## Sheet: 7h-DT WH TIG
	baseMean	log2FoldChange	lfcSE	stat	pvalue	padj
CG16743	382.514	2.25064	0.250379	8.98895	2.4961e-19	2.92501e-16
fit	478.123	2.19875	0.342525	6.41926	1.36941e-10	3.10591e-08
Nep7	383.078	1.83789	0.238035	7.72109	1.15338e-14	4.77023e-12
CG31777	283.446	1.70953	0.341726	5.00262	5.65557e-07	4.51867e-05
Agpat4	169.859	1.69888	0.262234	6.47851	9.26355e-11	2.17107e-08
atk	597.306	1.56625	0.200444	7.81391	5.54403e-15	2.59867e-12
CG9498	1255.59	1.55978	0.142683	10.9317	8.12788e-28	2.85735e-24
CG30033	200.726	1.46875	0.326327	4.50085	6.76807e-06	0.000328182
BomS3	3033.9	1.43337	0.363739	3.94065	8.12609e-05	0.00207762
CG5955	579.104	1.42318	0.199147	7.14639	8.9092e-13	2.8473e-10
MFS9	394.654	1.39448	0.195	7.15119	8.60276e-13	2.8473e-10
CG11211	2157.49	1.32587	0.432543	3.0653	0.00217455	0.021595
Nap1	454.934	1.30412	0.256224	5.08977	3.5849e-07	3.14973e-05
gammaSnap1	158.552	1.29703	0.289372	4.48224	7.38641e-06	0.000350904
Obp56h	228.114	1.29256	0.373074	3.46463	0.000530965	0.00795995
CG32726	234.54	1.28271	0.444889	2.8832	0.00393656	0.0320717
MtnA	3772.45	1.27148	0.243008	5.23225	1.67455e-07	1.68197e-05
Pepck2	201.865	1.25545	0.284328	4.41549	1.00783e-05	0.00043741
BomS1	372.582	1.25163	0.391597	3.19622	0.00139243	0.015919
Lst	1005.95	1.24399	0.276165	4.5045	6.65293e-06	0.000324838
CG13994	151.687	1.21916	0.237964	5.12331	3.00211e-07	2.74128e-05
CG3036	9081.43	1.21728	0.160308	7.59338	3.1167e-14	1.15334e-11
LanB2	1040.14	1.205	0.145094	8.30498	9.98404e-17	7.79975e-14
Pisd	2887.08	1.19502	0.145577	8.20884	2.23332e-16	1.57024e-13
CG14277	1260.07	1.17038	0.285456	4.10005	4.13066e-05	0.00129078
CG5958	954.895	1.12506	0.18653	6.03153	1.62417e-09	3.08636e-07
Adk2	185.224	1.12125	0.281982	3.97633	6.99871e-05	0.0018569
CG34228	162.418	1.08674	0.236676	4.59168	4.39685e-06	0.000235987
mRpL19	180.125	1.07615	0.188932	5.69596	1.2268e-08	1.69131e-06
CG8654	897.115	1.06917	0.184403	5.79799	6.71128e-09	1.07243e-06
CG15019	205.476	1.06794	0.215173	4.96316	6.93557e-07	5.24344e-05
RpLP0-like	201.132	1.06759	0.197414	5.40789	6.37708e-08	7.35036e-06
CG33296	196.643	1.05716	0.218005	4.84927	1.23919e-06	8.22399e-05
mRpL33	169.381	1.04038	0.32241	3.22688	0.00125147	0.0145495
Rpb12	208.803	1.03437	0.264359	3.91273	9.12571e-05	0.00228338
CG14688	886.55	1.03199	0.190355	5.4214	5.91348e-08	6.92961e-06
CG16772	2236.15	1.03142	0.283118	3.64308	0.000269398	0.00495847
Nplp2	28696.9	0.997484	0.267127	3.73412	0.000188372	0.00383896
CG31324	3214.7	0.996875	0.148661	6.70569	2.00457e-11	5.42082e-09
CG30026	271.434	0.99524	0.323377	3.07765	0.00208643	0.0209644
CG13722	188.5	0.985006	0.264542	3.72344	0.000196527	0.00393671
daw	1682.99	0.979887	0.219884	4.45639	8.33525e-06	0.00038304
Tig	2638.26	0.979714	0.235875	4.15353	3.27384e-05	0.00107651
Obp56g	1363.54	0.9678	0.307852	3.14372	0.00166818	0.0180168
CG9922	206.22	0.958903	0.221616	4.32686	1.51248e-05	0.000611163
Sem1	295.817	0.954735	0.239943	3.97901	6.92024e-05	0.00184304
Fib	216.605	0.948811	0.245518	3.86452	0.000111308	0.00262619
EMC5	191.529	0.947729	0.236872	4.00102	6.30704e-05	0.00171879
boca	328.398	0.942173	0.228814	4.11764	3.82779e-05	0.00122333
Hr38	6533.7	0.93918	0.167262	5.61502	1.96538e-08	2.60728e-06
CG14715	257.198	0.938486	0.209997	4.46905	7.85687e-06	0.000368278
RpL29	3376.36	0.933507	0.197304	4.73131	2.23079e-06	0.000132921
CG15021	1433.96	0.931033	0.265326	3.50901	0.000449775	0.0070905
CG13096	263.853	0.929661	0.171062	5.43464	5.49059e-08	6.5431e-06
SNRPG	178.61	0.9217	0.224528	4.10506	4.04218e-05	0.00128597
UQCR-6.4	748.24	0.916268	0.236346	3.8768	0.000105838	0.00255721
Obp49a	1800.11	0.915739	0.263146	3.47997	0.000501474	0.0076483
CG18067	11687.8	0.914523	0.329551	2.77506	0.00551921	0.0406767
CG5773	877.262	0.911802	0.192542	4.7356	2.18412e-06	0.000131252
Gnmt	4080.94	0.907018	0.218529	4.15056	3.3166e-05	0.00107958
edl	328.431	0.903905	0.213072	4.24226	2.21284e-05	0.000806139
Tmc	499.531	0.894368	0.196035	4.56228	5.06018e-06	0.000259695
Sod3	982.099	0.894118	0.156867	5.69985	1.19914e-08	1.68624e-06
CG4115	173.948	0.884141	0.292852	3.01908	0.00253547	0.023706
CG8157	211.105	0.883501	0.273345	3.23219	0.00122846	0.0144679
MsrA	1051.25	0.882278	0.112268	7.85868	3.882e-15	1.9496e-12
RpII18	167.28	0.87821	0.214258	4.09885	4.15208e-05	0.00129174
CG5645	255.415	0.872258	0.176117	4.95273	7.31814e-07	5.41619e-05
CG34200	209.215	0.869446	0.215851	4.02799	5.62554e-05	0.00158407
CG1468	2139.56	0.867653	0.286034	3.03339	0.00241821	0.0230073
His4r	3835.54	0.861189	0.220638	3.90318	9.49384e-05	0.0023587
sr	2816.41	0.858348	0.130176	6.59374	4.2887e-11	1.07692e-08
smt3	1082.95	0.857583	0.187207	4.58093	4.6291e-06	0.00024109
Cpr49Ae	1383.76	0.853794	0.182539	4.67732	2.90647e-06	0.000166142
RpS21	2331.94	0.848972	0.221802	3.82761	0.000129393	0.00292528
Apoltp	19386.2	0.848787	0.141212	6.01073	1.84692e-09	3.41729e-07
su(r)	1676.15	0.834319	0.172054	4.84916	1.23986e-06	8.22399e-05
CG13751	296.485	0.831948	0.172081	4.83464	1.33385e-06	8.71911e-05
Nop60B	501.478	0.824279	0.121131	6.80488	1.01134e-11	2.84428e-09
CG32276	1381.33	0.821886	0.133146	6.17283	6.70783e-10	1.31008e-07
ND-B14	819.548	0.821615	0.193497	4.24613	2.17491e-05	0.00079928
CG9436	1282.5	0.817761	0.155302	5.26562	1.39717e-07	1.46619e-05
CG6712	166.431	0.814803	0.21193	3.84468	0.000120712	0.00277361
ox	842.585	0.810856	0.214277	3.78416	0.000154231	0.00334692
Tapdelta	722.194	0.810201	0.159254	5.08747	3.62862e-07	3.14973e-05
CNBP	6150.92	0.80963	0.148788	5.44149	5.2836e-08	6.405e-06
CG8051	571.222	0.807879	0.227494	3.55121	0.000383466	0.00640415
BomS2	3185.43	0.801896	0.32531	2.46502	0.0137007	0.0734777
mRpS33	169.148	0.801349	0.265839	3.01442	0.00257473	0.0239774
CG14661	1907.52	0.790813	0.167409	4.72385	2.31425e-06	0.000136735
CG13364	346.315	0.788884	0.20062	3.93224	8.41575e-05	0.00213614
jeb	14570.2	0.787803	0.131725	5.98068	2.22208e-09	4.00601e-07
CG7800	229.373	0.778024	0.226241	3.43892	0.000584049	0.00841486
CG6870	1448.69	0.776456	0.180622	4.2988	1.71728e-05	0.000674538
RpS28b	5968.91	0.776122	0.222252	3.49208	0.000479273	0.00743878
Nha1	329.4	0.773739	0.207667	3.72587	0.000194642	0.00391009
mRpS14	211.771	0.772832	0.234952	3.28932	0.0010043	0.0126093
CG9065	617.607	0.772777	0.161113	4.79649	1.61473e-06	0.000101368
CRIF	347.22	0.768086	0.190574	4.03038	5.56875e-05	0.00158407
ND-B18	861.49	0.762911	0.206834	3.68851	0.000225567	0.00435703
nclb	241.109	0.761978	0.160719	4.74105	2.12613e-06	0.000128869
CG11529	182.516	0.758401	0.255418	2.96925	0.00298524	0.0265686
fon	3639.24	0.756442	0.215764	3.50588	0.0004551	0.00712652
maf-S	425.165	0.752088	0.193425	3.88827	0.000100963	0.00249051
CG31248	233.213	0.746464	0.218118	3.42229	0.000620967	0.00887403
AstC	939.913	0.743292	0.211781	3.50972	0.000448587	0.00708768
Thor	1612.55	0.738082	0.195925	3.76716	0.000165113	0.00351452
CG13606	288.446	0.737004	0.195666	3.76665	0.000165454	0.00351452
CG17734	1131.15	0.736518	0.14277	5.15877	2.48576e-07	2.36181e-05
CG1628	560.073	0.733268	0.19698	3.72255	0.000197221	0.00393938
CG15202	335.325	0.728823	0.196381	3.71128	0.000206216	0.00407279
SamDC	401.591	0.723697	0.149772	4.832	1.3517e-06	8.71911e-05
nero	197.61	0.723688	0.186296	3.88461	0.000102495	0.00249358
CG34134	906.097	0.723251	0.217239	3.32929	0.000870663	0.0113574
mRpL27	203.391	0.718929	0.261787	2.74623	0.0060284	0.0428731
Nlp	561.312	0.71759	0.161318	4.44828	8.6559e-06	0.000392643
PCB	17632.4	0.716579	0.123555	5.79969	6.64373e-09	1.07243e-06
CG10205	502.498	0.71252	0.16858	4.22661	2.37242e-05	0.000846726
Achl	3184.97	0.711393	0.145833	4.87812	1.07102e-06	7.53034e-05
CG6142	391.381	0.710771	0.170133	4.17773	2.94428e-05	0.000985221
Rbp1-like	11350.1	0.709835	0.168055	4.22382	2.40196e-05	0.000852937
CG17278	537.884	0.706553	0.216604	3.26195	0.00110648	0.0134004
Rbm13	206.449	0.704527	0.176782	3.98529	6.73971e-05	0.00180866
CG11368	2626.62	0.70422	0.234943	2.99741	0.00272282	0.0250218
MED22	171.734	0.701911	0.207161	3.38823	0.00070345	0.00966008
CG7203	465.77	0.701538	0.280209	2.50362	0.012293	0.0680332
CG14275	418.587	0.701415	0.155136	4.5213	6.14599e-06	0.000304313
RpS9	4485.8	0.699407	0.211981	3.29938	0.000968976	0.0122976
CG3829	2461.94	0.696922	0.166489	4.186	2.83913e-05	0.000969024
CG12811	313.104	0.69605	0.201979	3.44614	0.000568646	0.00829811
Cpr47Ee	299.507	0.694832	0.253186	2.74435	0.00606311	0.0430604
Elal	606.234	0.694609	0.19264	3.60574	0.00031127	0.00554361
CG15096	4197.13	0.69382	0.189571	3.65995	0.000252269	0.00474252
zye	317.254	0.693769	0.21159	3.27883	0.00104238	0.0128804
CG34331	471.399	0.690375	0.282053	2.44768	0.014378	0.0760659
CrebA	2343.03	0.688731	0.135452	5.08469	3.68229e-07	3.15734e-05
CG12173	178.217	0.685239	0.211156	3.24518	0.00117376	0.0140334
Obp99c	7222.58	0.684806	0.245596	2.78835	0.00529778	0.0396551
CG7484	261.51	0.682727	0.19626	3.47868	0.000503885	0.00766843
Pop1	160.143	0.680917	0.258222	2.63695	0.00836562	0.053003
Hex-A	9107.87	0.68054	0.114156	5.96147	2.49986e-09	4.39412e-07
Pfdn2	466.685	0.680085	0.157603	4.31518	1.59474e-05	0.00063708
dbe	191.236	0.67999	0.189339	3.5914	0.000328911	0.00576701
holn1	208.74	0.67773	0.191345	3.54193	0.000397215	0.00648287
CG10433	5741.75	0.67756	0.146901	4.61237	3.9811e-06	0.000215316
Srp19	218.276	0.676536	0.181013	3.7375	0.000185859	0.00381071
dsx	6136.9	0.676095	0.215311	3.14008	0.001689	0.0181581
Nph	177.141	0.673783	0.23338	2.88707	0.00388852	0.0317562
SelG	504.669	0.673666	0.190293	3.54014	0.000399908	0.00650869
CG12093	388.745	0.67303	0.183381	3.67011	0.000242444	0.00459467
UQCR-11	914.122	0.67267	0.155445	4.32738	1.50891e-05	0.000611163
Obp18a	364.698	0.671907	0.179689	3.73927	0.000184553	0.00381047
dmrt99B	147.338	0.670025	0.233428	2.87037	0.00409991	0.0332102
CG8389	346.474	0.668783	0.193742	3.45193	0.000556586	0.00822134
CG2811	217.535	0.666024	0.184318	3.61344	0.000302159	0.00544739
ATPsynE	2160.56	0.664414	0.181787	3.65491	0.000257276	0.00482376
CG7130	128.428	0.664002	0.249174	2.66481	0.00770314	0.0500416
CG5033	310.628	0.662424	0.162759	4.06997	4.70185e-05	0.00141026
CG30109	162.532	0.660875	0.229891	2.87472	0.0040438	0.0328313
EMC6	144.095	0.660541	0.223783	2.95171	0.00316022	0.0275608
CG30151	140.17	0.659946	0.227781	2.89729	0.00376407	0.0310052
CG17271	1182.45	0.657893	0.10032	6.55793	5.45616e-11	1.32284e-08
CG32278	552.097	0.650421	0.15258	4.26282	2.01863e-05	0.000770397
slow	551.724	0.648369	0.153677	4.21904	2.45343e-05	0.000862502
h	2267.75	0.647407	0.177666	3.64396	0.000268473	0.00495442
Fkbp39	300.23	0.646151	0.175601	3.67965	0.000233553	0.00448484
HIP	451.032	0.645957	0.180647	3.57579	0.000349168	0.00603193
AANAT1	4289.68	0.644933	0.0805485	8.00677	1.17765e-15	6.90002e-13
pr	814.816	0.644543	0.134715	4.78448	1.71429e-06	0.000106665
Rs1	365.364	0.64291	0.15885	4.04727	5.18181e-05	0.00149931
ImpL2	868.988	0.641435	0.18975	3.38042	0.000723754	0.00989083
Nplp3	3020.52	0.639544	0.24794	2.57943	0.0098964	0.0593036
CG7530	1688.12	0.63845	0.124253	5.13832	2.77205e-07	2.5987e-05
CG30423	770.43	0.637616	0.129838	4.91087	9.06754e-07	6.5055e-05
mRpL9	210.527	0.637565	0.201989	3.15644	0.00159709	0.0173962
Sardh	515.853	0.63754	0.238155	2.67699	0.00742862	0.049269
Cpr67B	1907.44	0.637481	0.155479	4.1001	4.12977e-05	0.00129078
Rlb1	188.075	0.637124	0.18386	3.46527	0.0005297	0.00795995
Cyp4d21	3573.38	0.637103	0.218279	2.91875	0.00351432	0.0296274
COX7C	2321.73	0.636712	0.223302	2.85135	0.00435339	0.0348042
CG30285	198.236	0.636286	0.24844	2.56112	0.0104335	0.061285
Sec61gamma	396.008	0.635281	0.160822	3.95021	7.80835e-05	0.00202585
CG11180	201.716	0.63284	0.178458	3.54616	0.000390889	0.00645151
mRpL18	150.121	0.630881	0.212641	2.96689	0.0030083	0.0267379
RpS15	8755.99	0.629499	0.207866	3.02839	0.0024586	0.023297
CG11811	495.002	0.629126	0.143737	4.37691	1.20373e-05	0.000509843
Elp2	216.659	0.62893	0.191646	3.28173	0.00103172	0.0128163
CG9253	534.808	0.62825	0.135475	4.63738	3.52854e-06	0.000195348
TfIIA-S	351.675	0.626605	0.176538	3.54941	0.000386101	0.00641768
CG15771	2343.37	0.624087	0.126823	4.92092	8.61389e-07	6.30877e-05
bc10	673.475	0.62378	0.165249	3.7748	0.000160138	0.00345377
CG7720	5419.39	0.623264	0.261878	2.37998	0.0173134	0.0859393
Acbp1	247.808	0.621607	0.223114	2.78606	0.00533535	0.0397714
Max	323.046	0.621221	0.160391	3.87317	0.000107428	0.00257791
CG44242	384.072	0.621061	0.161322	3.84984	0.000118197	0.00275181
srl	695.054	0.620058	0.124438	4.98286	6.26529e-07	4.8408e-05
ITP	1298.52	0.619562	0.156782	3.95173	7.75881e-05	0.00202045
CG18428	286.235	0.61825	0.212895	2.90402	0.00368405	0.0306177
CG14341	161.797	0.618081	0.197973	3.12204	0.00179601	0.0190751
CG13220	473.641	0.61776	0.187162	3.30067	0.000964546	0.0122739
CG6910	7670.87	0.617599	0.162217	3.80725	0.00014052	0.00312002
coil	279.661	0.616753	0.131544	4.68856	2.75133e-06	0.00015863
CG30172	606.367	0.615686	0.158961	3.87318	0.000107423	0.00257791
Fer2LCH	8537.13	0.614635	0.134669	4.56403	5.01813e-06	0.00025943
Pfdn1	173.667	0.606475	0.219532	2.76257	0.00573475	0.0415681
Ing5	236.016	0.605567	0.188573	3.21132	0.00132127	0.015233
CG6357	1597.39	0.602357	0.201518	2.98909	0.00279811	0.0254508
CG4806	442.704	0.601906	0.145416	4.13919	3.48539e-05	0.0011293
RpL31	6350.57	0.601067	0.17806	3.37565	0.000736414	0.0100149
CG11334	689.003	0.596408	0.158198	3.77001	0.000163239	0.00349918
CG10341	198.424	0.595492	0.167538	3.55436	0.000378905	0.0063612
CkIIbeta	4226.36	0.591586	0.133709	4.42442	9.66998e-06	0.000427608
RpS23	6671.01	0.589695	0.186441	3.1629	0.00156204	0.0171605
CG11267	728.138	0.588461	0.159438	3.69085	0.000223502	0.004341
bic	6591.27	0.587797	0.128985	4.55708	5.18695e-06	0.000264272
mRpL24	319.175	0.587762	0.17544	3.35022	0.000807462	0.0107562
cype	1805.92	0.586738	0.189744	3.09226	0.00198642	0.0203297
CG5849	269.628	0.586373	0.223062	2.62874	0.00857014	0.0538969
CG11583	198.582	0.584156	0.201051	2.90552	0.00366647	0.0305077
CG46338	219.107	0.582599	0.178214	3.26911	0.00107887	0.0131923
Srp14	175.838	0.582327	0.215314	2.70455	0.00683969	0.0466439
MrgBP	277.891	0.582035	0.198657	2.92985	0.00339125	0.0289548
Spase22-23	562.844	0.578316	0.162712	3.55423	0.000379084	0.0063612
Cyp6w1	3520.08	0.57674	0.21208	2.71945	0.00653904	0.0452075
Cpn	5087.57	0.574586	0.216397	2.65524	0.00792517	0.0510273
TfIIFalpha	589.423	0.574437	0.164339	3.49544	0.000473277	0.00736197
mge	1323.82	0.574164	0.140459	4.08775	4.35574e-05	0.00134913
wds	320.529	0.573403	0.155442	3.68886	0.000225265	0.00435703
CG31126	169.225	0.572221	0.221001	2.58922	0.00961935	0.0581045
alpha-Est8	2732.76	0.57094	0.121576	4.69617	2.65083e-06	0.000155317
VepD	193.388	0.570872	0.207558	2.75043	0.00595177	0.0425273
Irp-1B	2467.19	0.569935	0.137223	4.15334	3.27653e-05	0.00107651
l(3)77CDf	2706.42	0.56922	0.0916633	6.2099	5.30194e-10	1.09641e-07
ND-B12	1111.8	0.569193	0.19	2.99575	0.00273774	0.0250966
COX5B	2039.35	0.567386	0.175472	3.23348	0.00122291	0.0144509
mRpL30	298.458	0.566293	0.16675	3.39606	0.000683626	0.00942465
CG7560	211.336	0.565845	0.20555	2.75284	0.00590809	0.0423875
CG42240	2306.24	0.564895	0.13	4.34535	1.39055e-05	0.000571753
CG12325	233.267	0.563823	0.181707	3.10291	0.00191625	0.0197844
Cht11	160.056	0.563727	0.198517	2.8397	0.00451561	0.0355801
Pfdn4	290.962	0.563409	0.184997	3.0455	0.00232297	0.0224969
Tspo	373.747	0.562946	0.22246	2.53055	0.0113883	0.0650455
HmgZ	2378.4	0.562617	0.164377	3.42272	0.000619984	0.00887403
Crg-1	329.449	0.558253	0.198718	2.80927	0.00496535	0.038111
Mtap	560.242	0.557554	0.176872	3.1523	0.00161989	0.0175763
PDCD-5	263.209	0.555118	0.224663	2.47089	0.0134778	0.0727204
roh	2593.61	0.554177	0.168519	3.28852	0.00100715	0.0126226
CG5567	227.445	0.55307	0.222197	2.4891	0.0128066	0.0701819
Sting	198.534	0.552717	0.203965	2.70986	0.00673117	0.0461275
CG7016	536.353	0.550324	0.166712	3.30104	0.000963258	0.0122739
Prx2540-2	246.229	0.54906	0.233506	2.35137	0.0187042	0.0908433
CG5618	2489.25	0.548677	0.134546	4.078	4.54248e-05	0.00137665
CG10340	445.301	0.548232	0.155912	3.51628	0.000437637	0.00697738
CG8369	2013.49	0.548216	0.193126	2.83865	0.00453054	0.0356149
Sf3b6	506.979	0.547782	0.138104	3.96645	7.295e-05	0.00191385
CG32694	3105.22	0.547359	0.144616	3.78491	0.000153766	0.00334692
Rpt6	190.759	0.54627	0.235036	2.32419	0.0201152	0.0949568
Surf4	1634.13	0.542921	0.121942	4.45229	8.49575e-06	0.000387881
spin	9899.52	0.541591	0.148377	3.6501	0.000262137	0.00490182
CG2865	3422.65	0.541331	0.11546	4.68847	2.75251e-06	0.00015863
Tom7	621.138	0.540829	0.208039	2.59965	0.00933191	0.0569246
CG12301	188.365	0.540717	0.195944	2.75955	0.00578803	0.0417808
sug	645.407	0.540066	0.220209	2.45252	0.014186	0.0753904
CG32647	9910.65	0.538526	0.108414	4.9673	6.78928e-07	5.18864e-05
Taf10	239.091	0.537646	0.233658	2.301	0.0213916	0.0990807
CG13185	1921.91	0.537106	0.102815	5.224	1.75103e-07	1.7133e-05
CG32576	218.408	0.536521	0.181308	2.95917	0.00308469	0.0271106
CG13585	2050.41	0.535773	0.141128	3.79636	0.000146835	0.0032162
PAPLA1	7940.42	0.535128	0.0864223	6.19201	5.94014e-10	1.19329e-07
Mapmodulin	3103.39	0.534632	0.0930288	5.74695	9.0868e-09	1.3889e-06
snRNP-U1-C	141.772	0.534367	0.224148	2.38399	0.0171261	0.0856205
Lsm12a	877.753	0.53306	0.114524	4.65458	3.24637e-06	0.000184074
CG13024	674.612	0.532703	0.170977	3.11564	0.00183546	0.0193405
Fmo-2	1269.51	0.531593	0.170419	3.11933	0.00181261	0.0191934
ncm	1298.39	0.531236	0.111756	4.75354	1.99885e-06	0.000122208
Fkbp12	1849.11	0.530636	0.174502	3.04086	0.00235904	0.0226973
CG8665	2082.08	0.53059	0.174003	3.04932	0.00229363	0.0223896
CG2662	146.508	0.530264	0.22909	2.31465	0.0206321	0.0967058
Sirup	734.572	0.530145	0.192189	2.75846	0.00580753	0.0418368
14-3-3epsilon	18133.1	0.529402	0.131502	4.02579	5.67833e-05	0.00158407
ReepB	853.841	0.529348	0.138789	3.81405	0.000136707	0.0030611
CG10395	288.641	0.528078	0.169013	3.12448	0.00178119	0.0189871
Nop56	259.417	0.526719	0.178924	2.94381	0.00324199	0.0280029
CG15602	259.808	0.526073	0.153215	3.43355	0.000595727	0.00856556
Glut4EF	8713.87	0.524905	0.133023	3.94596	7.94795e-05	0.00204326
CG7630	1988.85	0.522073	0.188829	2.76479	0.00569592	0.0414576
S6k	3867.18	0.521798	0.089057	5.85915	4.65253e-09	7.78856e-07
CG4511	594.371	0.521084	0.135506	3.84546	0.000120325	0.00277361
vsg	10617.3	0.520791	0.12745	4.08624	4.38429e-05	0.00135202
CG7339	575.652	0.520298	0.170668	3.04859	0.00229915	0.0223896
mRpL47	217.019	0.519789	0.208025	2.49868	0.0124656	0.0686342
CG8360	497.391	0.517702	0.17204	3.00919	0.00261941	0.0242649
Meics	245.477	0.516751	0.151611	3.40841	0.000653436	0.00912197
sds22	221.096	0.513105	0.189432	2.70865	0.00675583	0.0462515
CG9706	326.023	0.511814	0.164866	3.10442	0.00190651	0.0197709
CG12355	399.497	0.511233	0.161861	3.15846	0.00158605	0.0173161
fbl	1927.82	0.51019	0.138706	3.67822	0.000234871	0.00448744
wdp	2603.8	0.509252	0.132391	3.84658	0.000119779	0.00277027
CG13625	312.094	0.508353	0.172527	2.94651	0.00321385	0.0278599
inaD	7672.6	0.508127	0.154422	3.29052	0.00100003	0.0125853
CG13631	1481.48	0.508041	0.159703	3.18116	0.00146688	0.0164722
CG6843	301.319	0.507812	0.149297	3.40136	0.000670503	0.00929096
Mip	669.212	0.506991	0.165718	3.05936	0.00221808	0.0218728
CG1789	165.306	0.506986	0.196731	2.57705	0.00996464	0.059576
NUCB1	3658.22	0.506516	0.128377	3.94552	7.96263e-05	0.00204326
Rh6	4751.55	0.504962	0.186961	2.7009	0.0069153	0.0469435
Ufc1	229.108	0.504516	0.216662	2.32858	0.0198811	0.0944787
CG2972	248.923	0.503552	0.184969	2.72237	0.00648163	0.0449879
Manf	628.128	0.503429	0.188954	2.66429	0.00771514	0.0500416
CG14186	6117.93	0.502934	0.0911615	5.51695	3.44924e-08	4.40939e-06
fd102C	211.166	0.501929	0.182922	2.74395	0.0060704	0.0430686
CG10680	2016.48	0.501245	0.1776	2.82232	0.00476775	0.0368445
CG5597	826.181	0.501034	0.187788	2.66808	0.00762864	0.049792
Phk-3	424.693	0.500341	0.16849	2.96955	0.00298233	0.0265686
CG4612	6001.04	0.499292	0.119457	4.17966	2.91944e-05	0.000982133
sun	1536.85	0.498675	0.162273	3.07306	0.00211877	0.0211606
COX6B	5088.87	0.498586	0.154454	3.22806	0.00124635	0.0145495
eIF3j	1488.88	0.498401	0.104595	4.76508	1.88779e-06	0.00011643
eIF2beta	1373.38	0.497846	0.130224	3.823	0.00013184	0.00297105
CG18178	180.984	0.496756	0.208334	2.38442	0.0171059	0.0856027
ple	2233.25	0.494047	0.1742	2.83609	0.00456691	0.0357971
CG13360	477.547	0.493291	0.190682	2.58697	0.00968227	0.0583842
Sec61beta	772.44	0.493095	0.116924	4.21722	2.47337e-05	0.000865186
Sbp2	233.703	0.493045	0.181255	2.72017	0.00652474	0.045153
CG44247	10612.1	0.492069	0.0968398	5.08127	3.74916e-07	3.17595e-05
ltl	4640.29	0.490959	0.136564	3.59508	0.000324292	0.00571453
CG7168	170.07	0.489488	0.203213	2.40875	0.0160074	0.0821518
Mes2	629.543	0.48917	0.199997	2.44588	0.0144499	0.0763889
vig2	1204.07	0.488656	0.111457	4.38425	1.16385e-05	0.000495941
Ent2	680.728	0.487816	0.144778	3.36941	0.000753296	0.0102051
Sam-S	9285.35	0.487186	0.0624813	7.79731	6.32391e-15	2.77897e-12
CG8939	386.702	0.487107	0.148414	3.28209	0.00103042	0.0128163
levy	3916.04	0.486248	0.180281	2.69718	0.00699303	0.0472769
CG9586	292.379	0.485417	0.152633	3.18029	0.00147128	0.0164722
CG11927	503.334	0.48394	0.136259	3.55161	0.000382885	0.00640415
CG12608	442.712	0.483725	0.135599	3.56733	0.000360639	0.00619963
Hmgs	1517.89	0.483518	0.106521	4.53918	5.64744e-06	0.000283623
CG10470	250.989	0.482857	0.172754	2.79505	0.00518909	0.0391045
Pdh	8436.6	0.482342	0.180594	2.67087	0.00756556	0.0495532
RpS29	8506.46	0.481555	0.205503	2.34331	0.0191137	0.0920469
Cam	61879.2	0.479894	0.132805	3.61354	0.00030205	0.00544739
lolal	2172.14	0.479637	0.11298	4.24534	2.18264e-05	0.00079928
Sas10	204.402	0.478268	0.183517	2.60613	0.00915728	0.0562338
RpS11	5523.22	0.477893	0.167718	2.84938	0.00438039	0.0348794
scyl	12488.5	0.477665	0.125744	3.79872	0.000145447	0.00319574
Cka	457.752	0.477604	0.182889	2.61144	0.00901612	0.055705
CG8206	982.635	0.477554	0.147905	3.2288	0.00124313	0.0145495
CG14894	327.648	0.477504	0.162682	2.93519	0.00333341	0.0286168
CG8149	362.461	0.476625	0.171215	2.78377	0.00537303	0.0399343
Nnp-1	511.497	0.476378	0.134431	3.54366	0.000394621	0.00648266
GIIIspla2	569.601	0.476332	0.175725	2.71067	0.00671483	0.0460642
frma	588.049	0.476027	0.198463	2.39857	0.0164593	0.0835563
Rab11	3466.23	0.475674	0.0902444	5.27096	1.35715e-07	1.44578e-05
Pp1-87B	4665.08	0.475603	0.110388	4.30846	1.64394e-05	0.000649355
Cdc7	1127.83	0.475069	0.123709	3.84021	0.000122928	0.00281533
Pfdn5	270.536	0.474764	0.166455	2.85221	0.00434168	0.034768
ATPsynF	3892.45	0.474657	0.173829	2.7306	0.00632187	0.0443161
RpL28	6017.36	0.472716	0.141251	3.34663	0.000818001	0.0108471
ctp	13087.7	0.470915	0.1361	3.46006	0.000540061	0.00803331
Mtp	1817.62	0.470512	0.17358	2.71064	0.00671538	0.0460642
sty	5718.5	0.467862	0.100886	4.63755	3.52564e-06	0.000195348
Chchd2	3626.68	0.467003	0.1366	3.41876	0.000629072	0.00895346
EloB	1645.42	0.465022	0.115522	4.02541	5.68751e-05	0.00158407
p24-1	550.428	0.464965	0.140984	3.29799	0.000973803	0.0123366
spab	1232.52	0.46489	0.123838	3.75403	0.000174015	0.00361983
CG4577	16135.9	0.46296	0.0951733	4.86439	1.14809e-06	7.76175e-05
Fdx2	366.86	0.462899	0.14928	3.10088	0.00192948	0.0198627
CG5316	1047.01	0.462005	0.100719	4.58709	4.49474e-06	0.000237613
ninaE	217704	0.461802	0.167366	2.75923	0.00579382	0.0417808
CG4364	2057.19	0.459371	0.123193	3.72888	0.000192333	0.00388591
Dlc90F	611.722	0.459314	0.148076	3.10188	0.00192296	0.0198246
CG1161	1109.63	0.458415	0.122655	3.73744	0.000185901	0.00381071
Vap33	6757.77	0.45808	0.124222	3.68759	0.000226386	0.00436088
CG6656	1051.57	0.457863	0.153333	2.98608	0.00282581	0.0256035
Proc	1331.3	0.457225	0.134038	3.41117	0.000646853	0.00912197
Dad1	270.636	0.456201	0.178718	2.55264	0.0106911	0.0622174
D1	1804.34	0.456153	0.129961	3.50992	0.000448242	0.00708768
CIA30	293.878	0.455792	0.195915	2.32648	0.0199929	0.094724
nSyb	28646.8	0.455784	0.103581	4.40027	1.08118e-05	0.000466365
Arl1	229.145	0.455583	0.181911	2.50443	0.0122648	0.0680077
Frq1	7950.13	0.455532	0.133638	3.4087	0.000652725	0.00912197
Idgf4	11344.6	0.455399	0.181829	2.50455	0.0122608	0.0680077
Vha16-1	36239.9	0.454609	0.0886082	5.13055	2.88897e-07	2.67268e-05
CkIalpha	6700.99	0.454376	0.108954	4.17033	3.04153e-05	0.00100873
Cbp20	193.667	0.453804	0.187688	2.41786	0.0156122	0.080476
Lamp1	5519.78	0.453339	0.124299	3.64718	0.000265139	0.00494191
UBL3	2597.04	0.45309	0.122085	3.71128	0.000206217	0.00407279
gb	269.415	0.452503	0.16045	2.82021	0.0047993	0.036968
CG17202	332.408	0.452068	0.153941	2.93663	0.00331798	0.0285192
CG7772	341.753	0.450845	0.159342	2.82943	0.00466316	0.0364297
AstA	590.945	0.450741	0.138607	3.25193	0.00114625	0.0137297
Idh	11028.3	0.450711	0.112455	4.00791	6.12578e-05	0.00167766
RpS27	4626.9	0.449907	0.184367	2.44028	0.0146759	0.0772096
glec	2465.56	0.449835	0.110289	4.07871	4.52868e-05	0.00137665
RpS20	3611.78	0.448696	0.190157	2.35961	0.0182941	0.0893854
CG5059	2866.07	0.447527	0.154844	2.89018	0.0038502	0.0315142
RpS13	4056.87	0.447482	0.144997	3.08614	0.00202772	0.0206769
cv-d	3116.01	0.446787	0.154756	2.88704	0.0038888	0.0317562
CG14274	549.449	0.446416	0.125249	3.56421	0.00036495	0.00625845
CSN6	318.891	0.446235	0.141194	3.16045	0.00157526	0.0172365
Mat1	220.283	0.445809	0.175448	2.54097	0.0110545	0.063552
Cyp1	6389.11	0.444911	0.140246	3.17236	0.00151204	0.0168215
Gs2	19077.3	0.444787	0.120897	3.67906	0.000234097	0.00448484
mRpS26	347.395	0.44474	0.1686	2.63784	0.00834356	0.0529455
Jwa	750.915	0.444661	0.149039	2.98352	0.00284955	0.0256861
Vha13	2845.44	0.444093	0.128801	3.4479	0.000564962	0.00829811
Adi1	634.937	0.442296	0.163764	2.70081	0.00691701	0.0469435
ghi	312.605	0.442161	0.172603	2.56172	0.0104155	0.0612716
CG4328	226.102	0.437431	0.186544	2.34492	0.0190314	0.0917762
sau	2058.29	0.433768	0.135471	3.20192	0.00136513	0.0156578
Mnt	8598.69	0.433696	0.0972594	4.45916	8.22796e-06	0.000380597
spz	867.908	0.433599	0.11559	3.75117	0.000176013	0.00365057
CG14184	393.32	0.433302	0.125998	3.43895	0.000583966	0.00841486
CG18622	245.676	0.433296	0.187559	2.31019	0.0208776	0.0975077
Cyp4e2	2720.77	0.432746	0.177726	2.43491	0.0148956	0.0780408
Ms	1503.83	0.432349	0.188469	2.29401	0.0217902	0.0998091
CG10026	458.258	0.432253	0.167561	2.57968	0.00988911	0.0593036
CG14132	366.478	0.432033	0.165187	2.61542	0.00891181	0.0553847
l(2)09851	266.59	0.431134	0.160954	2.67861	0.00739279	0.0490828
Atg6	329.161	0.431078	0.151642	2.84274	0.00447278	0.0354146
CG7220	4995.72	0.430883	0.0989961	4.35253	1.34576e-05	0.00055659
CG13784	8741.89	0.430691	0.0751026	5.7347	9.76825e-09	1.44935e-06
CG12239	4927.97	0.429671	0.15896	2.70302	0.00687117	0.0467678
DopEcR	12560.6	0.428546	0.114035	3.75801	0.000171269	0.00357846
mRpS11	260.542	0.42621	0.159431	2.67332	0.00751052	0.049398
RpS19a	5473.48	0.42525	0.146091	2.91086	0.0036044	0.0300652
JTBR	193.599	0.42447	0.183737	2.31021	0.0208766	0.0975077
CG2918	3873.67	0.422693	0.117343	3.60221	0.000315523	0.00558802
ND-B17	1395.22	0.422479	0.147414	2.86593	0.00415792	0.0335733
mamo	43079.7	0.421567	0.118311	3.5632	0.000366362	0.00626738
Sec22	1067.35	0.421443	0.108045	3.90064	9.59391e-05	0.00237517
RpL12	5358.94	0.421304	0.158124	2.6644	0.00771262	0.0500416
CG3335	260.15	0.420717	0.153537	2.74017	0.00614075	0.0433925
Pits	5516.89	0.419859	0.0993047	4.22799	2.35792e-05	0.000845896
Rim	46354.7	0.419723	0.112594	3.72775	0.000193196	0.00389215
CG1703	1049.94	0.419231	0.116176	3.60858	0.000307881	0.00552222
RabX4	611.904	0.418514	0.142054	2.94616	0.0032175	0.0278599
Gasp	582.861	0.418399	0.164798	2.53886	0.0111214	0.0638325
Atg8a	6208	0.417454	0.136299	3.06278	0.00219292	0.0217467
Sar1	3543.35	0.417125	0.110875	3.76212	0.000168478	0.0035466
CG15544	465.05	0.416019	0.136429	3.04935	0.00229334	0.0223896
CG17193	806.701	0.414533	0.124474	3.33027	0.000867612	0.0113386
CG5800	254.42	0.413681	0.178317	2.31991	0.0203455	0.0958777
CG32425	4684.22	0.413348	0.0920093	4.49246	7.04035e-06	0.000336739
COX5A	4696.83	0.413314	0.164492	2.51268	0.011982	0.0670742
mod	1123.94	0.413045	0.0848415	4.86844	1.12485e-06	7.75372e-05
Pmp70	4991.49	0.412965	0.0980603	4.21134	2.53865e-05	0.000883625
Sh	89701.7	0.412348	0.130456	3.16082	0.00157325	0.0172365
CG11791	1522.05	0.412155	0.16882	2.44139	0.014631	0.0770566
GV1	1580.66	0.412153	0.142306	2.89624	0.0037766	0.031025
CG32344	391.163	0.411437	0.134016	3.07005	0.00214025	0.0213146
CG15201	1297.84	0.410538	0.162789	2.52191	0.0116721	0.06597
RpL14	6119.38	0.409533	0.167311	2.44773	0.0143759	0.0760659
EMC4	548.675	0.409431	0.144628	2.83093	0.00464133	0.0362994
CG10960	6595.99	0.409343	0.0806618	5.0748	3.87898e-07	3.2468e-05
Rheb	1019.07	0.408646	0.123365	3.31249	0.000924694	0.0119513
CG9004	192.602	0.408114	0.171201	2.38382	0.0171338	0.0856205
14-3-3zeta	33829.1	0.406937	0.122717	3.31607	0.000912927	0.011821
zetaCOP	482.305	0.406701	0.1389	2.92802	0.00341132	0.0290728
scf	1172.72	0.404246	0.176089	2.29569	0.0216936	0.0996264
CG14687	1140.4	0.403965	0.154861	2.60856	0.00909231	0.0560961
CG13887	1950.05	0.40381	0.142883	2.82615	0.00471108	0.0366803
CG1785	257.197	0.402747	0.166391	2.42048	0.0154998	0.080073
Reph	5257.01	0.402635	0.114272	3.52348	0.000425913	0.0068758
Rap2l	981.805	0.401568	0.122008	3.29134	0.000997119	0.0125853
Rdl	44671.1	0.400882	0.142953	2.80429	0.00504273	0.0384699
CG8963	2309.83	0.40088	0.0941097	4.25972	2.04687e-05	0.000770397
CG10550	1977.5	0.400442	0.108237	3.69969	0.000215863	0.00422768
Cnx99A	6193.81	0.398849	0.122281	3.26173	0.00110733	0.0134004
eIF1A	4835.69	0.398567	0.0979619	4.06859	4.72989e-05	0.00141026
CG10560	828.616	0.39819	0.167252	2.38078	0.0172761	0.0859393
Atx2	8898.21	0.39815	0.0868684	4.58337	4.57543e-06	0.000240074
Pc	1050.29	0.397738	0.131257	3.03022	0.00244378	0.0232192
Vps29	267.724	0.39767	0.169735	2.34288	0.0191353	0.0920844
scrt	16305.8	0.3958	0.114842	3.44648	0.000567933	0.00829811
CG14478	4914.08	0.395359	0.0876892	4.50864	6.52452e-06	0.000320797
RpS17	5208.71	0.395319	0.153056	2.58283	0.00979924	0.058938
CG8188	2048.22	0.394993	0.114707	3.44349	0.000574248	0.00835929
Idh3a	5086.66	0.394847	0.106815	3.69656	0.000218537	0.00426815
Dhit	1758.26	0.394403	0.105663	3.73265	0.000189478	0.00385035
beta4GalNAcTA	552.248	0.39384	0.129146	3.04958	0.00229163	0.0223896
CG9911	966.475	0.393497	0.0963743	4.08301	4.44566e-05	0.00136495
CG6175	900.928	0.392823	0.1579	2.4878	0.0128536	0.070308
Rab14	1676.93	0.392677	0.093715	4.19011	2.78813e-05	0.000963094
GNBP2	624.504	0.392638	0.148904	2.63686	0.00836771	0.053003
ergic53	1407.32	0.392477	0.120526	3.25637	0.00112845	0.0135859
CG5151	5355.43	0.392354	0.146425	2.67956	0.00737201	0.0490736
CG6665	291.301	0.391754	0.140684	2.78464	0.00535864	0.0398694
LKRSDH	1127.34	0.391131	0.138693	2.82013	0.00480042	0.036968
Fkbp14	1415.36	0.390882	0.133637	2.92495	0.00344513	0.0292545
CG15312	2979.01	0.390488	0.130579	2.99043	0.00278582	0.0254048
tsr	1432.92	0.389164	0.120647	3.22565	0.00125689	0.0145588
out	1037.63	0.38893	0.135713	2.86584	0.00415905	0.0335733
Rap1	3243.95	0.388508	0.124837	3.11213	0.00185741	0.0194337
CG13367	333.896	0.38738	0.154556	2.50641	0.0121965	0.0678898
CG43324	667.854	0.386877	0.159106	2.43156	0.0150338	0.078512
Bacc	14096.4	0.386581	0.111053	3.48104	0.000499479	0.00764434
Hr3	1253.9	0.386295	0.159234	2.42596	0.0152678	0.0792617
CG9849	302.561	0.385215	0.16549	2.32772	0.0199269	0.0944787
GstO3	480.865	0.385183	0.149366	2.57878	0.00991506	0.05933
CG17778	669.462	0.384949	0.119317	3.22628	0.00125411	0.0145506
san	368.71	0.384662	0.159481	2.41196	0.015867	0.0815502
ND-ASHI	1069.58	0.384658	0.15622	2.46228	0.0138058	0.0738724
chic	6416.44	0.384655	0.112805	3.40991	0.000649845	0.00912197
Lk6	52834.6	0.384095	0.117786	3.26097	0.00111032	0.0134135
MED6	325.925	0.383897	0.152406	2.51891	0.0117719	0.0664271
CG7275	240.307	0.383837	0.149747	2.56324	0.01037	0.0611
Ccm3	938.602	0.383031	0.14216	2.69437	0.00705209	0.0475847
CG11417	343.99	0.382937	0.149791	2.55647	0.0105741	0.0618149
Rbp6	61093.4	0.382696	0.109375	3.49892	0.000467145	0.0072827
CG16953	3854.82	0.382415	0.0987911	3.87095	0.000108413	0.0025839
CG12512	694.385	0.380636	0.151191	2.51758	0.0118163	0.0665695
CG2016	1291.6	0.379853	0.158071	2.40305	0.016259	0.0828382
Kr-h2	1364.32	0.379782	0.105611	3.59605	0.000323081	0.0057075
RhoGAP5A	305.972	0.378494	0.149897	2.52502	0.0115692	0.0658113
slf	2369.07	0.377854	0.119401	3.16458	0.00155306	0.0170886
Tep3	658.024	0.377652	0.123593	3.05562	0.00224596	0.0221168
Ntf-2	1132.21	0.3775	0.126979	2.97292	0.00294982	0.0264206
RpL6	8391.04	0.377026	0.147101	2.56304	0.010376	0.0611
bol	21364.1	0.376315	0.120827	3.1145	0.00184258	0.019365
FRG1	288.757	0.376048	0.160694	2.34015	0.0192761	0.0925119
e(r)	695.765	0.375456	0.127829	2.93717	0.00331222	0.0285045
Rpn12	463.268	0.375204	0.162731	2.30567	0.021129	0.0982164
CG2199	411.408	0.373905	0.141157	2.64885	0.00807654	0.0516238
Lsd-2	8718.64	0.373102	0.136951	2.72435	0.00644275	0.0448881
eIF3k	850.465	0.373012	0.135299	2.75695	0.00583437	0.0419717
Idi	272.684	0.372463	0.150273	2.47857	0.0131909	0.0717286
homer	2442.54	0.372324	0.0962926	3.86659	0.00011037	0.00261283
CG5273	9603.59	0.370845	0.137631	2.69449	0.00704973	0.0475847
CG18815	2300.94	0.370253	0.106373	3.48069	0.000500127	0.00764434
CG6329	13704	0.369934	0.134712	2.74611	0.00603066	0.0428731
CG7990	2875.58	0.369557	0.100082	3.69255	0.000222013	0.00432402
His3.3A	1166.84	0.368565	0.13172	2.7981	0.00514049	0.0389051
Rho1	5117.55	0.368412	0.093969	3.92057	8.8339e-05	0.00222621
Rab10	1926.25	0.368343	0.0903108	4.07862	4.53045e-05	0.00137665
Droj2	7846.16	0.36793	0.0880225	4.17995	2.91567e-05	0.000982133
eIF4H1	3686.59	0.367359	0.113654	3.23226	0.00122817	0.0144679
EMC7	1000.12	0.367054	0.126502	2.90157	0.00371303	0.0308132
Trp1	2771.06	0.366559	0.0928608	3.9474	7.90036e-05	0.00204218
Ykt6	610.171	0.366466	0.143337	2.55668	0.0105676	0.0618149
CG7272	703.167	0.366282	0.119018	3.07754	0.00208719	0.0209644
Nca	1543.79	0.365993	0.134018	2.73092	0.00631582	0.0443161
Arf79F	4688.72	0.364835	0.0758428	4.8104	1.50627e-06	9.62781e-05
Arl8	1230.91	0.364705	0.114033	3.19823	0.00138274	0.0158339
l(1)G0320	2714.83	0.363892	0.0902752	4.03092	5.55586e-05	0.00158407
CG5065	17051.7	0.363104	0.144372	2.51506	0.0119012	0.0667814
Neb-cGP	1324.65	0.362643	0.142344	2.54765	0.0108452	0.0628629
ari-1	3469.43	0.362126	0.0891195	4.06337	4.83689e-05	0.00143495
UbcE2M	469.848	0.361225	0.129667	2.78579	0.00533981	0.0397714
RagC-D	707.985	0.35983	0.125684	2.86298	0.00419683	0.0337619
qkr58E-1	1369.55	0.35922	0.128492	2.79566	0.00517936	0.039073
CG10600	3134.51	0.356086	0.10629	3.35013	0.000807747	0.0107562
CG2608	427.182	0.355971	0.138827	2.56413	0.0103435	0.0610624
SkpA	1641.62	0.355797	0.132952	2.67613	0.00744779	0.049269
mahe	8354.64	0.355084	0.092305	3.84685	0.000119646	0.00277027
CG11317	2109.07	0.354608	0.0940176	3.77172	0.000162126	0.00348596
Ubc10	773.486	0.354249	0.1215	2.91562	0.00354986	0.0298554
Naa30A	1190.79	0.354197	0.108082	3.27711	0.00104876	0.0129169
Sgt	909.94	0.354174	0.127561	2.77651	0.00549461	0.0405805
DOR	9192.82	0.353807	0.0940863	3.76045	0.00016961	0.00355977
laza	2373.42	0.353545	0.12807	2.76056	0.00577028	0.0417808
Cyt-c-p	4765.62	0.353032	0.109699	3.21819	0.00129003	0.0149181
ATPsyndelta	2340.08	0.352545	0.148989	2.36625	0.0179691	0.088246
Amun	4077.85	0.352158	0.0913132	3.8566	0.000114977	0.00268572
eIF3g1	1414.33	0.352044	0.118186	2.97873	0.0028945	0.0260246
zfh1	2755.55	0.351858	0.121451	2.89713	0.00376595	0.0310052
fax	7437.59	0.351627	0.103205	3.40707	0.000656649	0.00912431
TMS1	3225.67	0.350119	0.123957	2.82451	0.0047353	0.0367522
CG6115	1005.39	0.349077	0.143112	2.43919	0.0147203	0.0772954
KdelR	1307.52	0.348077	0.122252	2.84721	0.00441047	0.0350396
akirin	1668.66	0.347481	0.0905569	3.83715	0.00012447	0.00283219
Fip1	609.009	0.347338	0.149892	2.31726	0.0204897	0.0963735
TfIIS	572.775	0.347301	0.131226	2.64658	0.00813102	0.0519248
CG14989	11977.9	0.346473	0.113431	3.05449	0.00225442	0.022138
CG15715	404.374	0.346386	0.150992	2.29407	0.0217864	0.0998091
RpL9	4961.31	0.345208	0.137155	2.51693	0.0118384	0.0665695
eEF1delta	1148.25	0.344364	0.140035	2.45912	0.0139278	0.0743557
Ran	1951.08	0.343695	0.0984795	3.49002	0.000482987	0.00745798
mrva	2461.89	0.343499	0.116906	2.93824	0.00330082	0.0284412
Sply	1069.19	0.342617	0.113441	3.02023	0.00252581	0.0236786
ken	679.203	0.342345	0.138705	2.46815	0.0135813	0.0730049
Pli	6889.18	0.341411	0.097836	3.48963	0.000483692	0.00745798
Ssdp	5290.89	0.341088	0.100078	3.40822	0.000653886	0.00912197
RpS7	9258.98	0.340544	0.135846	2.50683	0.0121818	0.0678747
knrl	1402.85	0.339125	0.131483	2.57923	0.0099022	0.0593036
CG12605	10044.9	0.338769	0.114028	2.97092	0.00296909	0.0265257
Pdp1	27959.3	0.338635	0.126974	2.66695	0.0076542	0.0498303
kdn	12179.3	0.338132	0.0954077	3.54408	0.000393987	0.00648266
CG43658	7356.42	0.338103	0.100026	3.38015	0.000724474	0.00989083
CG3760	635.848	0.337927	0.129605	2.60737	0.00912403	0.0562235
CG17385	638.592	0.337227	0.124535	2.7079	0.00677111	0.046311
Hdc	1286.31	0.337014	0.128341	2.62593	0.00864129	0.0541505
Pcmt	472.585	0.336758	0.123886	2.71829	0.00656212	0.045278
STUB1	652.444	0.336651	0.111431	3.02115	0.00251821	0.0236786
Rab3	9860.98	0.336571	0.108753	3.09482	0.00196933	0.0202137
CG9705	624.027	0.33579	0.13593	2.47032	0.0134991	0.0727299
Imp	6466.91	0.334316	0.134618	2.48344	0.013012	0.0710303
imd	286.824	0.333475	0.144987	2.30004	0.0214458	0.0991834
CG33181	5716.13	0.330598	0.104611	3.16025	0.00157632	0.0172365
oc	2955.48	0.328816	0.138049	2.38187	0.0172249	0.0859393
Ns4	654.162	0.328512	0.124164	2.64579	0.00815011	0.0519995
Idgf3	1316.06	0.328152	0.139743	2.34826	0.0188613	0.091384
eff	5701.11	0.328078	0.0901977	3.63732	0.000275493	0.00505742
CG5191	2905.55	0.32797	0.100532	3.26235	0.00110492	0.0134004
Vha44	7984.86	0.327838	0.0798822	4.10402	4.06037e-05	0.00128597
Mkp3	7105.26	0.327616	0.097662	3.35459	0.00079484	0.0106246
CanB	1850.85	0.326973	0.126157	2.59181	0.00954739	0.0578687
CG6912	2034.04	0.326736	0.121703	2.68469	0.00725963	0.0486536
CG11076	1065.36	0.326443	0.122389	2.66727	0.00764708	0.04983
salm	743.806	0.326302	0.139303	2.34239	0.0191608	0.0920844
schlank	1143.07	0.326121	0.107044	3.04661	0.00231439	0.0224758
Rab6	1137.5	0.326092	0.110338	2.95539	0.00312277	0.0273427
nes	1248.48	0.325484	0.118806	2.73963	0.00615082	0.043393
Rab7	2677.5	0.323787	0.0939592	3.44604	0.000568865	0.00829811
nrv3	42900.3	0.322814	0.139933	2.30691	0.0210596	0.0981245
Nopp140	772.198	0.320756	0.106184	3.02076	0.00252142	0.0236786
REG	688.062	0.320755	0.127226	2.52115	0.0116973	0.0660595
sqd	15097.7	0.320629	0.107148	2.99239	0.00276807	0.0253027
Kr-h1	5145.39	0.320323	0.127966	2.50319	0.0123081	0.0680332
CG3008	1271.86	0.319795	0.131688	2.42842	0.0151646	0.0789795
Acn	5071.78	0.317924	0.10494	3.02959	0.00244885	0.023236
IscU	2782.43	0.317375	0.120631	2.63095	0.00851462	0.0536436
bocks	456.804	0.316539	0.115108	2.74993	0.00596079	0.0425485
CG11857	1650.17	0.316403	0.107196	2.95162	0.00316111	0.0275608
puml	1813.2	0.315871	0.0976166	3.23584	0.00121287	0.01438
aqz	35599.7	0.315094	0.109888	2.86741	0.00413842	0.0334836
RabX1	532.086	0.314031	0.117855	2.66455	0.00770909	0.0500416
Rab5	6100.41	0.31369	0.0932006	3.36575	0.000763348	0.0103015
Cyt-b5	2860.43	0.313613	0.125982	2.48935	0.0127979	0.0701819
SCCRO4	1185.59	0.312396	0.133153	2.34615	0.0189686	0.0915362
CG8611	425.731	0.312141	0.132681	2.35257	0.0186442	0.0906551
CG17454	799.953	0.311997	0.119296	2.61533	0.00891414	0.0553847
porin	9689.21	0.3118	0.0983422	3.17056	0.00152145	0.0168461
Fer1HCH	5057.78	0.310849	0.119277	2.60611	0.00915768	0.0562338
Dh44	1547.93	0.310587	0.12902	2.40727	0.0160722	0.0823116
emp	7384.67	0.31052	0.127694	2.43176	0.0150258	0.078512
CG9813	16300.2	0.310503	0.104541	2.97016	0.0029765	0.026558
CG7115	1387.36	0.310386	0.104232	2.97783	0.00290293	0.026067
CG14024	792.64	0.309815	0.126967	2.44013	0.014682	0.0772096
pit	581.127	0.308714	0.12236	2.52299	0.0116361	0.0658831
Crtc	4018.08	0.308537	0.09831	3.13841	0.00169865	0.0182061
nmd	438.523	0.30853	0.131437	2.34737	0.0189066	0.091425
Ubc4	778.902	0.307725	0.116869	2.63307	0.00846164	0.0534925
l(1)G0289	7084.54	0.307509	0.0727321	4.22797	2.35807e-05	0.000845896
dmpd	1400.27	0.306256	0.0862787	3.54961	0.0003858	0.00641768
Bsg	24767.8	0.305784	0.0946932	3.2292	0.00124136	0.0145495
CG15765	14668.3	0.305351	0.0958309	3.18636	0.00144077	0.0162601
dysc	27744.7	0.305091	0.118417	2.57641	0.00998316	0.0596128
Yeti	1303.09	0.304826	0.100715	3.02661	0.0024731	0.0233714
CG30389	6334.82	0.304717	0.100881	3.02058	0.00252294	0.0236786
pyr	1305.61	0.303833	0.114508	2.65339	0.00796878	0.0512143
SK	22352.6	0.303677	0.115085	2.63872	0.00832201	0.0528564
CG9132	1702.79	0.30343	0.101851	2.97916	0.00289036	0.0260207
CG7546	2534.28	0.30194	0.0731141	4.1297	3.63233e-05	0.00116616
Pglym78	2637.43	0.301246	0.104168	2.89191	0.00382905	0.0314143
Ih	24355.3	0.299954	0.0911104	3.2922	0.000994062	0.0125706
MBD-like	521.934	0.299776	0.125701	2.38483	0.0170869	0.085599
tok	6207.57	0.299599	0.0828092	3.61794	0.000296956	0.00538119
pAbp	31482.6	0.298859	0.0989248	3.02108	0.00251879	0.0236786
eIF1	1246.92	0.29742	0.116878	2.54472	0.0109366	0.0631425
CG7378	4558.41	0.296933	0.117182	2.53395	0.0112786	0.0645239
sbm	5418.1	0.296764	0.0723408	4.1023	4.09063e-05	0.00128974
hook	1144.12	0.296668	0.0944413	3.14129	0.00168204	0.0181387
Frq2	3638.93	0.29626	0.110179	2.68889	0.00716895	0.0482805
shep	54310.8	0.29602	0.101145	2.92669	0.00342587	0.0291261
Snx3	1273.71	0.295147	0.110952	2.66013	0.00781103	0.0504468
Oda	15148	0.295046	0.0981422	3.00632	0.00264433	0.0244314
Vsx1	1231.85	0.294716	0.11614	2.53759	0.0111618	0.0639596
Hk	15037.6	0.294093	0.0974075	3.0192	0.00253442	0.023706
BTBD9	914.082	0.293996	0.0924332	3.18063	0.00146957	0.0164722
CG7878	1037.91	0.293754	0.112353	2.61455	0.00893438	0.0554364
Ubc6	3886	0.292733	0.107011	2.73555	0.00622761	0.0438741
Agpat1	1396.8	0.292469	0.123068	2.37648	0.0174785	0.0865432
Sec63	1265.61	0.292008	0.0823157	3.54742	0.000389025	0.00645102
Rilpl	5383.7	0.291865	0.0893445	3.26674	0.00108795	0.0132717
Scamp	1899.07	0.291722	0.0987465	2.95425	0.00313426	0.0274092
Vps60	778.295	0.2914	0.106893	2.72609	0.0064089	0.0447477
Aps	3937.33	0.291159	0.100178	2.90642	0.00365593	0.030456
SoxN	3271.72	0.291147	0.115611	2.51834	0.0117911	0.0664822
Drep1	784.013	0.290497	0.102931	2.82226	0.00476866	0.0368445
CG9837	1607.05	0.290305	0.10809	2.68578	0.00723611	0.048568
Pdi	7555.88	0.289667	0.114813	2.52293	0.011638	0.0658831
CanA-14F	13895.7	0.289546	0.104787	2.76318	0.00572406	0.0415681
CG3198	3100.44	0.288233	0.108017	2.6684	0.0076214	0.049792
Rab2	3015.62	0.287451	0.0941941	3.05169	0.00227558	0.0223146
CG10209	495	0.286881	0.121309	2.36487	0.0180363	0.088495
endos	1475.34	0.285731	0.0995089	2.87141	0.00408643	0.0331392
CARPA	794.163	0.284792	0.119352	2.38615	0.0170259	0.0853847
Mo25	1784.84	0.284231	0.0928808	3.06017	0.00221212	0.0218728
qvr	19268.1	0.283777	0.107647	2.63618	0.00838442	0.0530611
Trf4-1	4427.67	0.283381	0.0847787	3.3426	0.000829985	0.0109036
Mnn1	5016.08	0.282892	0.0787878	3.59056	0.000329968	0.00577115
Vmat	11594.3	0.282857	0.122673	2.30577	0.0211235	0.0982164
qm	2752.52	0.281704	0.10862	2.59349	0.00950082	0.0576859
CG10333	811.919	0.279893	0.119791	2.33652	0.019464	0.0930327
MSBP	2704.59	0.27903	0.115532	2.41517	0.0157277	0.0810119
miple1	5619.07	0.277875	0.109271	2.54298	0.0109912	0.0633437
tau	7678.26	0.277819	0.0915237	3.03549	0.00240147	0.0229256
Naus	2255.99	0.277471	0.093534	2.96652	0.00301187	0.0267379
Tom40	1165.39	0.277074	0.0921392	3.00712	0.00263731	0.0243986
ps	64372.8	0.27612	0.100519	2.74695	0.00601529	0.0428506
CG5522	2437.3	0.274169	0.0791639	3.46331	0.000533575	0.00798206
CG12213	1833.13	0.27357	0.0805852	3.3948	0.000686799	0.00944988
Rac1	1133.04	0.273509	0.104584	2.61522	0.00891701	0.0553847
meng	1933.38	0.273446	0.113669	2.40562	0.0161449	0.0824961
CG43066	10326.8	0.272035	0.0852211	3.19211	0.00141239	0.0160949
Mlf	4463.49	0.269803	0.078193	3.45047	0.000559607	0.00824864
Sap47	33158.2	0.269565	0.102994	2.61728	0.00886329	0.0551974
Arf51F	1416.28	0.268907	0.0996479	2.69857	0.00696383	0.0471835
alph	3663.66	0.268561	0.0682129	3.93709	8.24741e-05	0.002101
Pino	7767.53	0.268256	0.114333	2.34627	0.0189624	0.0915362
Atpalpha	151219	0.268049	0.0756815	3.5418	0.0003974	0.00648287
hrg	3215.14	0.267815	0.0823214	3.25328	0.00114081	0.0136877
puc	5026.9	0.267479	0.106701	2.5068	0.0121829	0.0678747
CG12071	3091.16	0.267153	0.112498	2.37475	0.017561	0.0867076
eRF3	2780.73	0.266909	0.065783	4.05741	4.96201e-05	0.00145684
tbc	3449.88	0.266858	0.111076	2.40249	0.0162839	0.0828454
Rsf1	1652.33	0.266573	0.0883491	3.01727	0.00255062	0.0237844
Vha36-1	1636.2	0.266474	0.103582	2.5726	0.0100938	0.0598897
Vps26	1637.14	0.266143	0.0940025	2.83123	0.00463692	0.0362994
norpA	51755.4	0.265294	0.0876854	3.02552	0.00248204	0.0234245
CG8910	3005.69	0.265068	0.106511	2.48865	0.012823	0.0702168
SRPK	6117.54	0.264275	0.0725231	3.64401	0.000268418	0.00495442
UbcE2H	2989.32	0.263491	0.0902264	2.92033	0.00349664	0.0295136
Chd64	4031.18	0.262917	0.0949774	2.76821	0.00563659	0.0412576
tral	6536.15	0.262309	0.0805958	3.25462	0.00113544	0.0136466
dpr20	1396.34	0.262136	0.100099	2.61877	0.00882481	0.0550924
Aef1	2469.46	0.261656	0.0884715	2.95752	0.00310122	0.0272218
eIF4E1	3177.76	0.261305	0.0857417	3.04759	0.00230688	0.0224339
path	8305.77	0.261286	0.111963	2.33368	0.0196123	0.0935509
lola	46222.3	0.260794	0.0886035	2.94339	0.00324643	0.0280069
corto	9018.09	0.260673	0.0858164	3.03756	0.002385	0.0229084
CG8668	1461.29	0.260165	0.0968484	2.68632	0.00722447	0.048568
Cdc42	1553.05	0.258769	0.10469	2.47177	0.0134447	0.0727152
mura	18747.4	0.258618	0.109508	2.36163	0.0181946	0.0890232
SCaMC	6039.65	0.258359	0.0871447	2.96471	0.00302967	0.0268282
His3.3B	14050.9	0.257542	0.0989239	2.60343	0.0092295	0.0565267
CG8814	1519.87	0.256869	0.092512	2.77661	0.00549299	0.0405805
Fmr1	3498.61	0.256811	0.0826721	3.10638	0.00189392	0.0197276
CG14591	2526.15	0.2553	0.0870884	2.9315	0.00337331	0.0288888
wcy	4239.54	0.255243	0.0800065	3.19028	0.00142137	0.0161517
kek1	4892.6	0.254584	0.0960306	2.65107	0.00802361	0.051398
eEF1alpha2	18725.3	0.253879	0.0972114	2.61162	0.00901149	0.055705
Atg17	5131.46	0.253466	0.0763353	3.32043	0.000898795	0.0116595
sd	4471.57	0.25333	0.0922115	2.74727	0.00600931	0.0428506
CG44838	6621.48	0.252006	0.106482	2.36666	0.0179495	0.088246
mts	5528.1	0.251912	0.0924591	2.72458	0.00643831	0.0448881
TM9SF4	1167.35	0.251017	0.108432	2.31497	0.0206148	0.0967058
Stam	2203.16	0.250901	0.0883035	2.84135	0.00449231	0.0354556
tna	12316.3	0.250387	0.084674	2.95707	0.00310579	0.027228
sip3	1394.37	0.249615	0.102643	2.43187	0.0150212	0.078512
bur	2163.79	0.248774	0.0661129	3.76286	0.000167981	0.0035466
hwt	10399	0.248353	0.0846272	2.93467	0.00333904	0.0286303
CG42795	24772.9	0.24757	0.0845048	2.92966	0.00339337	0.0289548
Larp4B	13762.7	0.247005	0.0754362	3.27435	0.00105905	0.0129951
CG1316	2732.22	0.246707	0.0873048	2.82581	0.00471612	0.0366803
sgg	24831.6	0.246336	0.0736162	3.34622	0.0008192	0.0108471
CG17321	2207.96	0.246223	0.103451	2.38008	0.0173087	0.0859393
CG3907	1714.17	0.245104	0.0879105	2.78811	0.00530164	0.0396551
Rb97D	1702.56	0.245035	0.0934634	2.62172	0.00874875	0.0546777
Tsp97E	4375.69	0.244654	0.0972935	2.5146	0.0119169	0.0668164
CG45050	14212.2	0.243884	0.102158	2.38732	0.0169715	0.0852942
Pect	4242.1	0.243524	0.0724585	3.36088	0.000776947	0.010445
eIF4G1	13280.5	0.242843	0.06495	3.73893	0.000184806	0.00381047
bsk	2324.25	0.2422	0.105311	2.29986	0.0214562	0.0991834
CAH3	1200.62	0.241259	0.0948081	2.54471	0.0109368	0.0631425
dtn	13296.2	0.241179	0.0855939	2.81771	0.00483676	0.0371664
vvl	3117.17	0.241062	0.0930276	2.59129	0.00956161	0.057905
CG42258	4993.13	0.240648	0.104739	2.29759	0.0215852	0.099388
CG14435	1819.95	0.23978	0.0790002	3.03518	0.00240389	0.0229256
casp	1596.4	0.23926	0.0858139	2.78813	0.00530131	0.0396551
ens	10487.9	0.237657	0.074655	3.1834	0.00145558	0.0163747
DCP2	6070.25	0.237039	0.0833984	2.84225	0.0044797	0.0354294
Rip11	3895.17	0.236421	0.0843889	2.80157	0.00508553	0.0386138
oys	4493.33	0.236159	0.0612273	3.85708	0.000114748	0.00268572
Psc	945.835	0.23615	0.0971673	2.43035	0.0150844	0.0786782
nudE	1903.29	0.235757	0.0895688	2.63213	0.00848514	0.0535058
Flo2	4109.59	0.235635	0.102688	2.29467	0.0217523	0.0997653
CG6983	2053.14	0.23555	0.0982622	2.39715	0.016523	0.083638
Ggamma30A	73768.1	0.235528	0.0918863	2.56326	0.0103695	0.0611
ssx	6380.27	0.235109	0.0807305	2.91227	0.00358815	0.0300099
tgo	1270.2	0.235051	0.0845905	2.77869	0.00545787	0.040394
Gdh	9091.24	0.234615	0.0843935	2.78002	0.0054356	0.0402715
CycT	6590.44	0.234235	0.0757164	3.09359	0.00197752	0.0202682
Dgk	6472.78	0.233637	0.0926046	2.52295	0.0116376	0.0658831
CG2162	1945.89	0.232879	0.0741925	3.13885	0.00169614	0.0182061
trc	2228.09	0.232822	0.0799	2.91391	0.00356928	0.029947
Tlk	15122.5	0.232097	0.0849183	2.73318	0.00627256	0.0441024
Top1	4858.66	0.231536	0.0689447	3.35828	0.000784284	0.0105034
Mob2	20614.6	0.231299	0.0863381	2.67899	0.00738443	0.0490736
Vrp1	4909.54	0.231101	0.0882812	2.61778	0.00885035	0.0551656
CG8677	6695.91	0.229941	0.0646535	3.55652	0.000375806	0.00635166
Nelf-A	3082.96	0.229644	0.0832123	2.75974	0.00578469	0.0417808
Galphas	2590.55	0.228153	0.0741021	3.0789	0.00207766	0.0209288
Dlic	4414.97	0.22581	0.0805268	2.80417	0.0050447	0.0384699
CG3061	2421.33	0.225457	0.0936434	2.40761	0.0160572	0.0823116
eIF3h	2082.05	0.225201	0.0955285	2.35743	0.0184021	0.0897886
Trf2	6849.93	0.224673	0.0809998	2.77374	0.00554153	0.0407985
Cbl	2908.37	0.224512	0.0841552	2.66784	0.00763416	0.049792
CG10508	2604.84	0.224141	0.0890484	2.51707	0.0118336	0.0665695
U2af50	1141.32	0.223503	0.0892685	2.50372	0.0122896	0.0680332
Hrb27C	23038.2	0.222925	0.0968629	2.30145	0.0213663	0.0990807
Tango5	2197.91	0.221605	0.0724304	3.05956	0.00221661	0.0218728
Deaf1	2733.51	0.22153	0.0948733	2.33501	0.019543	0.0932836
Moe	10576.5	0.220794	0.0709227	3.11316	0.00185093	0.0193948
Syx5	1280.47	0.218154	0.0907609	2.40361	0.0162342	0.0828162
AGO1	18646.6	0.217228	0.0906708	2.39579	0.0165844	0.0838884
Ppcs	3936.74	0.216367	0.0891554	2.42685	0.0152305	0.0792291
flw	11659.2	0.215862	0.0881217	2.44959	0.0143018	0.0758914
FBXO11	2918.09	0.215837	0.075791	2.84779	0.00440241	0.0350151
Ndf	2351.05	0.214606	0.0641313	3.34636	0.000818813	0.0108471
MICAL-like	1381.71	0.21392	0.0919791	2.32574	0.0200323	0.0947546
stau	7953.37	0.212547	0.0874183	2.43138	0.0150413	0.078512
TM4SF	4578.37	0.205977	0.0839538	2.45346	0.0141491	0.0753084
Edc3	2831.57	0.204212	0.088912	2.29679	0.0216307	0.0994673
Ttd14	7971.45	0.203505	0.0801956	2.53761	0.0111614	0.0639596
Cow	27649.9	0.203026	0.0841413	2.41292	0.0158254	0.0813962
Abi	1212.6	0.203018	0.0854405	2.37614	0.0174949	0.0865635
Cnot4	6076.35	0.195887	0.0672657	2.91214	0.00358958	0.0300099
rudhira	14029.5	0.195799	0.0632426	3.096	0.00196148	0.0201625
sws	4716.07	0.195584	0.0622726	3.14077	0.00168502	0.018143
CG11050	2916.75	0.190463	0.0741758	2.56773	0.0102367	0.0605147
Faf2	1768.13	0.189765	0.0794228	2.3893	0.0168806	0.0849591
CG8405	3730.65	0.189515	0.0659051	2.87557	0.00403296	0.0327812
kra	6191.78	0.188129	0.0662123	2.84129	0.0044931	0.0354556
Tudor-SN	2820.25	0.187526	0.0741811	2.52795	0.0114731	0.0654237
Ubqn	3940.4	0.187506	0.0793726	2.36236	0.0181592	0.0889119
cg	6265.39	0.186096	0.0653006	2.84983	0.00437425	0.03487
Kap-alpha3	3749.24	0.183814	0.063364	2.90092	0.00372073	0.0308132
Hrb87F	1758.55	0.182629	0.0760903	2.40016	0.0163879	0.083254
wdb	18288.6	0.182339	0.0787703	2.31482	0.0206225	0.0967058
CG1910	1897.9	0.180485	0.0771385	2.33976	0.0192964	0.0925462
Synd	4162.76	0.179968	0.0725402	2.48094	0.0131036	0.0714195
Gdap2	11970.8	0.179497	0.0774622	2.31722	0.0204919	0.0963735
CG11000	8801.45	0.177626	0.0723485	2.45515	0.0140828	0.075012
eIF5B	4603.63	0.177281	0.0732379	2.42061	0.0154944	0.080073
RhoGAP68F	1925.19	0.175632	0.0699467	2.51094	0.012041	0.0673511
RanBPM	5653.54	0.173931	0.058739	2.96108	0.00306559	0.0270742
Slik	9138.87	0.172978	0.0670335	2.58047	0.00986647	0.0592409
Rm62	16791.8	0.172221	0.0698907	2.46414	0.0137341	0.0736009
Hrb98DE	6347.54	0.171051	0.0677092	2.52626	0.0115285	0.065633
Cdc27	1538.25	0.169189	0.0733502	2.30659	0.0210776	0.0981435
Rok	3544.71	0.168143	0.0636751	2.64064	0.00827501	0.0527007
Wnk	8922.9	0.163041	0.0668349	2.43945	0.0147094	0.0772954
Dp1	8616.21	0.156652	0.0656309	2.38687	0.0169925	0.0853387
Ptpmeg2	8366.03	0.156094	0.0675695	2.31013	0.020881	0.0975077
Dp	1910.28	0.153601	0.0594892	2.58199	0.00982312	0.0590311
tyf	9493.66	0.135519	0.0582047	2.32832	0.019895	0.0944787

## Sheet: 7h-DT WH TRG
	baseMean	log2FoldChange	lfcSE	stat	pvalue	padj
FASN2	428.507	-3.11973	1.07934	-2.89041	0.00384742	0.0315142
CG9492	305.671	-2.23114	0.834107	-2.67488	0.00747559	0.0493066
tobi	13366.6	-2.17422	0.273761	-7.94204	1.98886e-15	1.07567e-12
CG9313	119.209	-2.06466	0.623905	-3.30926	0.000935441	0.012002
CG31075	1603.2	-2.04236	0.182666	-11.1808	5.06047e-29	3.55802e-25
FASN3	478.972	-2.00673	0.651768	-3.0789	0.0020777	0.0209288
snoRNA:Psi28S-3342	827.644	-1.96262	0.677065	-2.89873	0.00374682	0.0309564
CG3999	845.061	-1.86668	0.220223	-8.47631	2.32455e-17	2.33485e-14
Dhc93AB	464.088	-1.74982	0.676134	-2.58798	0.00965393	0.0582633
alpha-Est2	350.043	-1.62362	0.202358	-8.02349	1.02781e-15	6.56959e-13
Ubx	236.22	-1.56075	0.597004	-2.6143	0.0089411	0.0554364
Dhc36C	161.453	-1.47071	0.47283	-3.11044	0.00186806	0.0195161
lectin-28C	592.532	-1.33936	0.29195	-4.58764	4.4829e-06	0.000237613
CG16898	786.948	-1.26443	0.199097	-6.35084	2.14141e-10	4.70507e-08
CG13796	183.036	-1.2487	0.235191	-5.30929	1.1005e-07	1.20901e-05
CG8745	1300.99	-1.23905	0.121568	-10.1923	2.14725e-24	3.77433e-21
CG3699	1601.29	-1.23616	0.226834	-5.44965	5.04701e-08	6.33671e-06
Got2	5247.02	-1.18596	0.141408	-8.38678	4.99655e-17	4.39134e-14
Gart	6413.17	-1.18563	0.268312	-4.41885	9.92257e-06	0.000433327
UGP	3342.69	-1.1543	0.156323	-7.38404	1.53554e-13	5.3982e-11
Gbs-70E	7375.59	-1.14507	0.150318	-7.61766	2.58314e-14	1.009e-11
CG9485	2955.53	-1.14024	0.179871	-6.33922	2.3093e-10	4.92021e-08
CG18302	361.499	-1.13851	0.197126	-5.77555	7.67033e-09	1.19845e-06
Sodh-1	5052.85	-1.09089	0.200296	-5.44639	5.14023e-08	6.34052e-06
snRNA:7SK	37867.1	-1.05292	0.400513	-2.62893	0.00856535	0.0538969
ATPCL	14437	-0.968489	0.0908859	-10.6561	1.63307e-26	3.82737e-23
CG13318	215.234	-0.956141	0.236717	-4.03916	5.36421e-05	0.00153942
hgo	406.229	-0.943653	0.177839	-5.30623	1.11916e-07	1.21058e-05
CG9664	446.019	-0.935667	0.207954	-4.49939	6.81476e-06	0.000328182
Shmt	4423.6	-0.934894	0.182707	-5.11689	3.10607e-07	2.7644e-05
Galk	3953.06	-0.915157	0.175849	-5.20423	1.94804e-07	1.87625e-05
AkhR	630.113	-0.905959	0.241097	-3.75765	0.000171518	0.00357846
Hml	2930.35	-0.890809	0.192275	-4.63298	3.60435e-06	0.000197986
Got1	4227.15	-0.888278	0.0975574	-9.10518	8.61198e-20	1.21102e-16
AGBE	1765.48	-0.884571	0.128979	-6.85828	6.96949e-12	2.04177e-09
Cyp6g1	4157.4	-0.873743	0.205697	-4.24771	2.15967e-05	0.000799191
dsb	4315.79	-0.855434	0.239338	-3.57417	0.000351339	0.00605457
defl	193.034	-0.849056	0.208695	-4.0684	4.73363e-05	0.00141026
alpha-Est1	1508.47	-0.846342	0.199047	-4.25196	2.11906e-05	0.000792507
CG5793	650.666	-0.843355	0.160981	-5.23886	1.61568e-07	1.64636e-05
Amy-d	1225.15	-0.835582	0.342128	-2.44231	0.0145937	0.0769569
CG3376	2208.31	-0.827033	0.194163	-4.25948	2.04899e-05	0.000770397
CG10932	821.124	-0.819194	0.164172	-4.98986	6.04245e-07	4.72616e-05
CG10352	204.536	-0.813383	0.194143	-4.18961	2.79436e-05	0.000963094
rempA	202.129	-0.802455	0.230214	-3.4857	0.00049085	0.00755178
GILT2	238.166	-0.798273	0.286026	-2.79091	0.00525594	0.0395235
CG5532	329.085	-0.796071	0.232685	-3.42124	0.00062336	0.00889015
CG12268	228.676	-0.793515	0.278314	-2.85115	0.00435609	0.0348042
CG5397	322.933	-0.793121	0.224144	-3.53845	0.000402482	0.00653546
CG30427	591.243	-0.788967	0.185715	-4.24828	2.15422e-05	0.000799191
Tps1	13260.9	-0.787434	0.202845	-3.88195	0.000103623	0.00251232
Prat2	4762.01	-0.759462	0.204234	-3.7186	0.000200334	0.00397895
Jabba	1831.73	-0.755296	0.175032	-4.3152	1.59461e-05	0.00063708
CG4267	317.801	-0.739133	0.201226	-3.67315	0.00023958	0.00456501
comm2	637.487	-0.735878	0.169401	-4.34401	1.39906e-05	0.000571907
sut1	323.041	-0.734033	0.234773	-3.12656	0.00176864	0.0188987
gkt	343.214	-0.731192	0.163449	-4.47352	7.69407e-06	0.000363067
RpL22	5684.22	-0.730973	0.205299	-3.56053	0.000370111	0.00630072
GlyS	2820.25	-0.728507	0.130106	-5.59932	2.15189e-08	2.80185e-06
CG14400	150.201	-0.727064	0.311152	-2.33669	0.0194556	0.0930327
CG7966	940.369	-0.723686	0.148602	-4.86996	1.1162e-06	7.75372e-05
Zw	1137.07	-0.720653	0.133973	-5.37908	7.48654e-08	8.48998e-06
CG10516	949.899	-0.718421	0.198477	-3.61967	0.000294983	0.00537312
NtR	161.66	-0.714887	0.251352	-2.84416	0.00445283	0.0352963
CG1271	224.022	-0.714246	0.1895	-3.76911	0.000163833	0.00350125
CG14196	432.377	-0.71047	0.216427	-3.28272	0.00102811	0.0128163
Argl	1750.04	-0.708929	0.169731	-4.17678	2.95664e-05	0.000985221
Ir68a	252.52	-0.701797	0.261933	-2.6793	0.0073776	0.0490736
CG31673	587.624	-0.698274	0.138577	-5.03888	4.68263e-07	3.81621e-05
Pgd	2451.82	-0.697562	0.151171	-4.61438	3.9427e-06	0.000214892
mei-41	347.053	-0.681694	0.175441	-3.88561	0.000102073	0.00249192
Slc45-1	268.539	-0.67901	0.258706	-2.62464	0.00867405	0.0542591
Ugalt	252.117	-0.674908	0.168404	-4.00766	6.13227e-05	0.00167766
CG2694	164.34	-0.672515	0.161984	-4.15174	3.29956e-05	0.00107903
GstE2	174.34	-0.663477	0.226377	-2.93085	0.00338039	0.0289142
cu	1278.24	-0.663077	0.131076	-5.05872	4.22089e-07	3.49142e-05
CG5945	2320.07	-0.661224	0.246152	-2.68625	0.007226	0.048568
ACC	45207.5	-0.658748	0.157459	-4.18361	2.86921e-05	0.000974562
CG16863	217.091	-0.655931	0.19241	-3.40903	0.000651947	0.00912197
Acer	2159.97	-0.655323	0.18899	-3.46751	0.000525303	0.00792576
Lrpprc2	1145.37	-0.654645	0.161489	-4.05379	5.03939e-05	0.00147021
Lsp1beta	13007.9	-0.652351	0.237025	-2.75224	0.00591887	0.0424216
PIG-A	143.974	-0.651982	0.273892	-2.38044	0.0172922	0.0859393
Cyp12a5	360.379	-0.650206	0.150864	-4.30989	1.63338e-05	0.00064883
Gapdh1	7937.45	-0.646371	0.151384	-4.26974	1.95698e-05	0.000751888
CG17124	5043.39	-0.644554	0.122725	-5.25201	1.50445e-07	1.55556e-05
Ir93a	131.134	-0.642827	0.24675	-2.60518	0.00918259	0.0563375
CG7059	201.934	-0.641502	0.219396	-2.92395	0.00345621	0.0292778
CG8036	6876.58	-0.640218	0.133262	-4.8042	1.55373e-06	9.84171e-05
Pgi	7212.17	-0.639657	0.0932415	-6.86022	6.87568e-12	2.04177e-09
CG11594	2025.99	-0.638114	0.178021	-3.58449	0.000337743	0.0058779
CG14694	185.855	-0.637862	0.215071	-2.96582	0.00301874	0.0267651
GatA	194.706	-0.637075	0.204133	-3.12088	0.00180309	0.0191214
CG3270	559.551	-0.634959	0.144676	-4.38885	1.13954e-05	0.000488541
CG13707	130.43	-0.630909	0.249922	-2.52442	0.011589	0.0658301
Ddx1	378.289	-0.625608	0.16863	-3.70994	0.000207311	0.00408293
pug	7731.29	-0.625046	0.170208	-3.67225	0.000240428	0.00456879
CG9331	1959.07	-0.624266	0.140508	-4.44291	8.87497e-06	0.000398469
CG15365	307.437	-0.623204	0.18265	-3.41201	0.000644865	0.00912197
AOX3	3092.61	-0.618853	0.10854	-5.7016	1.18688e-08	1.68624e-06
CG3740	205.463	-0.613417	0.193445	-3.17102	0.00151907	0.0168461
CG9008	556.509	-0.611099	0.138089	-4.4254	9.62649e-06	0.000427608
HDAC6	4456.11	-0.607228	0.15079	-4.02697	5.65005e-05	0.00158407
b	1197.15	-0.605048	0.182713	-3.31147	0.000928061	0.0119524
THADA	439.298	-0.600897	0.180316	-3.33247	0.000860781	0.0112703
SPE	1883.75	-0.598931	0.184585	-3.24473	0.0011756	0.0140334
Ugt49C1	482.986	-0.596742	0.147648	-4.04165	5.30768e-05	0.00152944
yellow-b	209.854	-0.596199	0.237472	-2.51061	0.0120524	0.0673612
CG5044	455.041	-0.595964	0.173743	-3.43016	0.000603231	0.00865575
Rpi	522.819	-0.595691	0.16841	-3.53715	0.000404476	0.0065527
Marc	157.16	-0.594533	0.250415	-2.37419	0.0175877	0.0867173
CG7724	466.566	-0.59432	0.170616	-3.48337	0.000495137	0.0076011
Cyp12a4	1325.39	-0.591766	0.135485	-4.36775	1.25536e-05	0.000525382
CG7135	859.781	-0.591287	0.173546	-3.40709	0.000656603	0.00912431
CG3281	198.83	-0.589498	0.171363	-3.44006	0.000581592	0.00841394
CG3309	353.622	-0.586562	0.169875	-3.4529	0.00055459	0.0082091
Aldh7A1	921.241	-0.585802	0.168535	-3.47585	0.000509246	0.00773328
CG13101	143.936	-0.585733	0.211315	-2.77185	0.00557385	0.0409506
Cyp28d1	4218.68	-0.585229	0.188455	-3.1054	0.00190024	0.019735
PSR	471.071	-0.583726	0.151306	-3.85792	0.000114358	0.00268572
PIG-S	353.357	-0.58025	0.131297	-4.41936	9.89922e-06	0.000433327
CG18003	1030.24	-0.578683	0.180205	-3.21125	0.0013216	0.015233
CG18135	10365.8	-0.578025	0.11475	-5.03727	4.7221e-07	3.81621e-05
Nup93-2	182.296	-0.577328	0.166864	-3.45987	0.000540429	0.00803331
CG9147	154.092	-0.575459	0.204161	-2.81865	0.00482264	0.0370985
CG31935	375.763	-0.573579	0.134279	-4.27154	1.94128e-05	0.000749952
Sk2	676.279	-0.573258	0.1415	-4.05129	5.09368e-05	0.0014799
CG16935	557.99	-0.572392	0.176759	-3.23827	0.00120256	0.0142824
CG12182	183.42	-0.571235	0.184884	-3.08969	0.00200368	0.0204765
CG11961	465.96	-0.570114	0.14273	-3.99435	6.48717e-05	0.00175428
CG6654	524.31	-0.567159	0.198724	-2.854	0.00431722	0.0346116
M6	704.423	-0.566396	0.126904	-4.46319	8.07497e-06	0.000375994
bgm	2783.19	-0.565353	0.164012	-3.44703	0.000566792	0.00829811
Nmdmc	1826.44	-0.564695	0.200112	-2.82189	0.00477416	0.0368464
CG17068	422.731	-0.564488	0.157078	-3.59367	0.000326055	0.00573124
CG7326	273.759	-0.562117	0.161762	-3.47496	0.00051093	0.00774214
CG14892	186.287	-0.561043	0.211053	-2.6583	0.00785365	0.0506596
CG2121	599.849	-0.559958	0.188382	-2.97246	0.00295427	0.0264268
GlyP	12058.4	-0.55815	0.112611	-4.95646	7.17909e-07	5.36981e-05
sev	3306.84	-0.558119	0.127606	-4.37376	1.22127e-05	0.000514175
comm3	748.584	-0.557183	0.158851	-3.50758	0.000452205	0.00709699
SCOT	638.021	-0.556718	0.138679	-4.01443	5.95901e-05	0.00164305
RpL10Ab	3568.1	-0.55516	0.224955	-2.46787	0.0135921	0.073007
yellow-c	315.568	-0.555111	0.195499	-2.83946	0.00451899	0.0355801
mTerf5	173.098	-0.554074	0.179658	-3.08406	0.002042	0.0206963
CG7791	558.204	-0.553894	0.15192	-3.64597	0.000266389	0.00494191
mib1	2170.8	-0.553259	0.094302	-5.86688	4.44067e-09	7.6152e-07
Ugt37D1	561.334	-0.552612	0.151542	-3.64659	0.000265738	0.00494191
CG6028	568.268	-0.549773	0.167765	-3.27704	0.00104901	0.0129169
CG10137	765.252	-0.54896	0.125934	-4.35912	1.30585e-05	0.000543281
Fbxl7	285.538	-0.548931	0.176852	-3.1039	0.00190986	0.0197765
Patsas	779.913	-0.548647	0.156396	-3.50807	0.00045137	0.00709699
Faa	469.734	-0.548286	0.144171	-3.80304	0.000142933	0.00315237
Ent1	180.84	-0.5482	0.185994	-2.9474	0.00320454	0.0278162
Dhod	277.486	-0.547245	0.207315	-2.63968	0.00829833	0.0528014
Irbp	189.184	-0.546808	0.236839	-2.30877	0.0209564	0.0977735
if	3731.78	-0.543819	0.11971	-4.54282	5.55078e-06	0.000280773
Pgm2a	1141.63	-0.542476	0.141495	-3.83388	0.000126138	0.00286089
CG3149	392.98	-0.539398	0.179225	-3.00962	0.00261577	0.0242649
CG8778	188.407	-0.536229	0.209654	-2.55768	0.0105372	0.0617394
CG1105	693.543	-0.532637	0.109492	-4.86462	1.14674e-06	7.76175e-05
CG34396	322.587	-0.531537	0.227414	-2.33731	0.0194231	0.0930271
Coprox	236.52	-0.529031	0.208144	-2.54167	0.0110325	0.0634778
lbm	324.233	-0.527055	0.197911	-2.66309	0.00774277	0.050159
CG11089	4339.96	-0.526931	0.156864	-3.35915	0.000781814	0.0104903
CG32032	400.591	-0.524539	0.212461	-2.46887	0.0135539	0.0729689
Mdh1	5215.12	-0.521564	0.124563	-4.18715	2.82482e-05	0.000968845
Pex16	247.89	-0.518839	0.187556	-2.76631	0.00566945	0.0413934
phr	194.726	-0.51848	0.220101	-2.35565	0.0184905	0.0901574
RpLP0	9616.78	-0.518469	0.139307	-3.72178	0.000197826	0.00394028
CG5789	1261.43	-0.516205	0.131452	-3.92694	8.60329e-05	0.00217589
CG3842	567.755	-0.515637	0.1619	-3.1849	0.00144803	0.0163158
CG30456	402.062	-0.515391	0.159498	-3.23134	0.0012321	0.0144864
Prosalpha4	339.446	-0.515097	0.164868	-3.12429	0.00178232	0.0189871
Uba3	194.854	-0.511884	0.161542	-3.16874	0.00153102	0.0169255
CG7737	323.55	-0.511263	0.153771	-3.32484	0.000884682	0.0114976
Tg	606.323	-0.510509	0.164236	-3.10838	0.00188114	0.0196236
CG8086	5457.88	-0.510493	0.166312	-3.06949	0.00214426	0.0213244
Invadolysin	4244.54	-0.510078	0.114821	-4.44236	8.89768e-06	0.000398469
Trxr-2	319.817	-0.509574	0.203195	-2.5078	0.0121484	0.0677899
TrpRS-m	550.628	-0.508521	0.183512	-2.77106	0.0055875	0.041008
KFase	197.91	-0.508013	0.195695	-2.59594	0.0094332	0.0574173
scu	1226.63	-0.50731	0.157181	-3.22756	0.00124852	0.0145495
rod	268.694	-0.506071	0.167199	-3.02676	0.00247187	0.0233714
Dcr-1	1124.9	-0.505966	0.149483	-3.38477	0.000712384	0.00976369
CG13876	195.123	-0.503772	0.190689	-2.64185	0.00824539	0.0525597
CG10916	352.229	-0.50344	0.176076	-2.85921	0.00424691	0.0341258
CG8027	238.047	-0.500149	0.196736	-2.54223	0.0110148	0.0634273
eIF2Bgamma	319.353	-0.499937	0.155885	-3.20709	0.00134083	0.0154043
Pgk	3488.04	-0.499061	0.116377	-4.2883	1.80045e-05	0.00069939
Rab27	525.141	-0.496197	0.168184	-2.95032	0.00317446	0.027593
CG1208	298.975	-0.495076	0.208674	-2.37248	0.017669	0.086944
CG3225	229.462	-0.494471	0.192377	-2.57032	0.0101605	0.0602347
EMC2B	287.839	-0.493558	0.177817	-2.77565	0.00550908	0.0406446
Mdr65	1502.48	-0.493449	0.146727	-3.36303	0.000770906	0.0103836
Gbs-76A	3056.9	-0.492551	0.100277	-4.9119	9.01973e-07	6.5055e-05
CG17333	332.093	-0.491039	0.200207	-2.45265	0.0141808	0.0753904
Oseg1	236.414	-0.490936	0.139724	-3.51362	0.000442048	0.00703177
CG11899	1003.62	-0.48972	0.198113	-2.47192	0.0134389	0.0727152
Secp43	217.379	-0.488495	0.196369	-2.48763	0.0128596	0.070308
grsm	1028.36	-0.487544	0.114419	-4.26103	2.03487e-05	0.000770397
Taldo	3267.16	-0.487338	0.153823	-3.16818	0.00153394	0.0169312
Ir76a	346.414	-0.486707	0.152588	-3.18969	0.00142427	0.0161517
ea	265.546	-0.482906	0.180766	-2.67144	0.00755264	0.049536
Ugt35B1	973.698	-0.482567	0.168526	-2.86346	0.00419037	0.0337486
GstE9	1589.01	-0.480054	0.171501	-2.79913	0.005124	0.0388221
CG12081	416.275	-0.478268	0.140624	-3.40105	0.000671285	0.00929096
por	215.037	-0.475881	0.202671	-2.34805	0.0188721	0.091384
fat-spondin	2956.04	-0.475498	0.191742	-2.47989	0.0131424	0.0715205
smo	446.752	-0.474517	0.155642	-3.04877	0.0022978	0.0223896
omd	692.08	-0.474266	0.166079	-2.85566	0.00429471	0.0344705
Ucp4A	1009.32	-0.473247	0.0948463	-4.98962	6.0497e-07	4.72616e-05
CG16896	483.973	-0.473123	0.130753	-3.61845	0.000296375	0.00538119
chico	202.319	-0.471609	0.194826	-2.42066	0.0154922	0.080073
CG13531	1314.5	-0.470017	0.132533	-3.5464	0.000390526	0.00645151
pinta	402.29	-0.469762	0.168417	-2.78928	0.00528257	0.039639
Rhp	515.487	-0.468658	0.121042	-3.87188	0.000107998	0.00258278
Cyp4s3	341.888	-0.467435	0.157775	-2.96267	0.00304984	0.0269729
Impbeta11	342.684	-0.466762	0.166696	-2.80007	0.00510915	0.0387512
CG5599	307.745	-0.466722	0.170646	-2.73504	0.00623733	0.0438986
Cyp12e1	223.285	-0.466315	0.179268	-2.60122	0.00928941	0.0567453
Gclm	1329.59	-0.464649	0.150818	-3.08087	0.00206396	0.0208502
Bmcp	563.268	-0.463481	0.121876	-3.80288	0.000143025	0.00315237
Spat	1236.65	-0.461442	0.162569	-2.83843	0.00453354	0.0356149
CG6607	352.46	-0.460857	0.141356	-3.26026	0.0011131	0.013424
pigeon	589.863	-0.460823	0.126973	-3.6293	0.000284193	0.00520355
Nup107	397.267	-0.460674	0.158119	-2.91347	0.00357436	0.0299539
CG31445	1330.29	-0.460585	0.177681	-2.5922	0.0095365	0.0578525
CG17065	1131.27	-0.458161	0.137084	-3.34218	0.000831225	0.0109036
Dcr-2	1825.43	-0.457695	0.0876201	-5.22363	1.75448e-07	1.7133e-05
scb	1066.27	-0.457493	0.148983	-3.07078	0.00213499	0.0212924
DNApol-iota	664.408	-0.45682	0.163716	-2.79032	0.00526557	0.0395537
spel1	536.419	-0.45674	0.129705	-3.52137	0.000429319	0.0069026
Pgm1	4038.24	-0.456559	0.176307	-2.58957	0.00960957	0.0580953
CG6841	524.523	-0.45591	0.165029	-2.7626	0.0057343	0.0415681
CG3626	732.145	-0.454773	0.124212	-3.66126	0.000250981	0.00473096
Dci	208.088	-0.453547	0.165381	-2.74243	0.00609856	0.0431812
CG6729	473.803	-0.453275	0.127298	-3.56074	0.000369807	0.00630072
CG9121	688.522	-0.452391	0.137802	-3.2829	0.00102744	0.0128163
Nop17l	2887.44	-0.449319	0.0783806	-5.73253	9.89456e-09	1.44935e-06
rho-5	3265.69	-0.448176	0.118698	-3.77576	0.000159518	0.00345099
CG31676	609.394	-0.446978	0.128764	-3.4713	0.000517952	0.00783166
CG17167	249.592	-0.446689	0.192075	-2.3256	0.0200398	0.0947546
Aasdh	358.619	-0.445885	0.159467	-2.79609	0.00517242	0.0390708
CG7322	1345.96	-0.444792	0.19043	-2.33572	0.0195059	0.0931699
Tsp42Eg	481.776	-0.44365	0.15924	-2.78605	0.00533554	0.0397714
Hpd	3243.29	-0.443304	0.149727	-2.96074	0.003069	0.0270742
CG33523	2157.96	-0.441699	0.0780918	-5.65615	1.5481e-08	2.09321e-06
CG17544	969.377	-0.441037	0.108639	-4.05964	4.91487e-05	0.00145195
CG6961	184.432	-0.440873	0.191584	-2.3012	0.0213805	0.0990807
CG12730	313.088	-0.439872	0.165761	-2.65365	0.00796252	0.0512143
NAAT1	1075.37	-0.439363	0.134112	-3.27609	0.00105255	0.0129379
bmm	3377.52	-0.438183	0.15119	-2.89822	0.00375284	0.0309697
Gfat2	693.626	-0.437241	0.146134	-2.99206	0.00277103	0.0253027
CG42788	11992.1	-0.437229	0.0658092	-6.64388	3.05532e-11	7.95629e-09
Rtca	341.522	-0.432097	0.179851	-2.40252	0.0162824	0.0828454
CG9886	614.024	-0.431753	0.119775	-3.60469	0.000312523	0.00554886
Rpe	309.555	-0.430679	0.173396	-2.48379	0.0129992	0.0710161
prt	1994.62	-0.43026	0.176165	-2.44237	0.0145911	0.0769569
MED14	2241.6	-0.429901	0.104001	-4.13363	3.57071e-05	0.00115164
jumu	768.522	-0.429462	0.122705	-3.49995	0.000465346	0.00727078
CG6428	455.297	-0.429364	0.169916	-2.52692	0.0115068	0.0655627
CG13409	916.549	-0.427491	0.107056	-3.99315	6.52021e-05	0.00175646
cold	243.054	-0.427295	0.159709	-2.67545	0.00746281	0.049269
Orct	629.501	-0.427175	0.169972	-2.51321	0.0119638	0.067026
NT5E-2	461.778	-0.426921	0.18501	-2.30755	0.0210241	0.0980242
Vdup1	704.843	-0.425845	0.150559	-2.82843	0.00467774	0.036503
fu	461.57	-0.425584	0.15221	-2.79603	0.0051735	0.0390708
CG33156	405.873	-0.424873	0.139726	-3.04076	0.00235979	0.0226973
Best1	1816.99	-0.423097	0.108877	-3.886	0.000101912	0.00249192
CG16979	404.087	-0.421996	0.116339	-3.62729	0.000286411	0.00523053
CG7369	234.792	-0.421227	0.182022	-2.31416	0.0206588	0.0967058
CG6903	947.583	-0.420665	0.127848	-3.29036	0.00100059	0.0125853
Tsf2	1008.46	-0.419425	0.110016	-3.81238	0.000137632	0.00307204
stet	257.861	-0.418832	0.16515	-2.53607	0.0112104	0.0641859
Rcd2	376.706	-0.418732	0.163087	-2.56755	0.0102421	0.0605147
CG4658	951.295	-0.416146	0.111531	-3.73121	0.000190559	0.00386116
DhpD	934.665	-0.415401	0.120696	-3.4417	0.000578064	0.00838014
Plap	499.809	-0.415386	0.131893	-3.14943	0.0016359	0.0176955
Cyp6a23	708.364	-0.415294	0.180892	-2.29581	0.0216867	0.0996264
Paics	6055.8	-0.414487	0.161289	-2.56984	0.0101745	0.0602671
Nprl3	344.398	-0.413309	0.1522	-2.71557	0.00661618	0.0454725
CCKLR-17D3	599.002	-0.412913	0.176273	-2.34246	0.0191571	0.0920844
ERR	418.738	-0.41259	0.137665	-2.99705	0.00272603	0.0250218
HERC2	18513.4	-0.412207	0.127717	-3.2275	0.00124877	0.0145495
CG7806	1048.35	-0.412054	0.103837	-3.96826	7.23993e-05	0.00190652
Vps13B	1476.89	-0.411437	0.133327	-3.08592	0.00202922	0.0206769
fuss	436.944	-0.411338	0.158785	-2.59053	0.00958294	0.0579842
CG9945	522.338	-0.411089	0.122997	-3.34226	0.000830991	0.0109036
ABCB7	1106.36	-0.410269	0.103379	-3.96857	7.23049e-05	0.00190652
Prosbeta1	555.292	-0.409344	0.149372	-2.74043	0.0061359	0.0433925
Tfb1	576.037	-0.409042	0.160051	-2.55571	0.0105973	0.0618336
CG8298	580.311	-0.408522	0.110363	-3.70163	0.000214219	0.00420719
net	1086.49	-0.407505	0.161917	-2.51674	0.0118445	0.0665695
vlc	1840.07	-0.407277	0.0964978	-4.22058	2.43674e-05	0.000860942
CG13921	2001.31	-0.406686	0.144783	-2.80894	0.00497053	0.038111
eIF2Bepsilon	586.481	-0.405868	0.119014	-3.41025	0.000649045	0.00912197
Sec6	298.925	-0.405331	0.153983	-2.63231	0.00848061	0.0535058
vir	1307.44	-0.401266	0.142067	-2.82448	0.00473581	0.0367522
S2P	431.905	-0.399092	0.13369	-2.98519	0.00283401	0.0256356
Nipsnap	1255.27	-0.397376	0.128801	-3.08519	0.00203423	0.0206769
Cyp28d2	214.039	-0.395604	0.165315	-2.39303	0.0167097	0.08434
CG10171	262.222	-0.395502	0.147987	-2.67255	0.00752775	0.0494651
CG33080	2326.33	-0.395255	0.138689	-2.84994	0.00437272	0.03487
Arp3	772.474	-0.395065	0.109401	-3.61118	0.000304806	0.00548106
CG7414	3930.34	-0.393469	0.152729	-2.57625	0.00998775	0.0596128
CG6126	1554.75	-0.39338	0.151214	-2.60148	0.00928233	0.0567453
CG11191	1136.16	-0.392536	0.123084	-3.18917	0.00142682	0.0161546
CG15651	636.663	-0.389845	0.154191	-2.52832	0.0114611	0.0654081
vap	1989.22	-0.389534	0.0797255	-4.88594	1.02935e-06	7.31046e-05
Ptpmeg	4056.21	-0.38935	0.0760854	-5.11727	3.09982e-07	2.7644e-05
CG4678	2034.53	-0.388291	0.107691	-3.60559	0.000311439	0.00554361
CG6701	1785.96	-0.388023	0.140311	-2.76546	0.00568434	0.0414161
Zw10	464.38	-0.387959	0.140872	-2.75398	0.0058876	0.0422836
aralar1	4207.86	-0.387616	0.0801904	-4.83369	1.34023e-06	8.71911e-05
ck	2096.87	-0.387444	0.101772	-3.80699	0.000140669	0.00312002
CG8777	534.176	-0.386887	0.133585	-2.89619	0.00377719	0.031025
lic	808.499	-0.386779	0.0960603	-4.02642	5.66321e-05	0.00158407
fal	258.645	-0.386082	0.158483	-2.43611	0.0148463	0.0778408
f-cup	1098.51	-0.385832	0.115949	-3.32761	0.000875942	0.0114051
CG3104	1347.35	-0.385606	0.0986588	-3.90848	9.2878e-05	0.00231569
IntS2	773.313	-0.383753	0.141006	-2.72153	0.0064981	0.0450573
DppIII	1315.37	-0.383437	0.125521	-3.05477	0.00225234	0.022138
Mccc2	447.742	-0.38333	0.144312	-2.65626	0.00790121	0.0509197
CG18596	441.453	-0.383192	0.151804	-2.52425	0.0115945	0.0658301
mtm	622.601	-0.381547	0.12774	-2.98691	0.00281815	0.025567
obe	1235.51	-0.379598	0.140224	-2.70707	0.00678789	0.0463654
Tmtc3	947.848	-0.379312	0.105721	-3.58788	0.000333378	0.00581632
XRCC1	311.462	-0.378906	0.14717	-2.57461	0.0100354	0.0597957
ND-51	4473.72	-0.37877	0.14151	-2.67664	0.00743647	0.049269
CG5439	337.017	-0.37806	0.164594	-2.29692	0.0216231	0.0994673
Nrk	444.029	-0.376102	0.1464	-2.56901	0.0101991	0.0603618
Akr1B	2996.18	-0.374949	0.12475	-3.0056	0.00265058	0.024457
CG31368	767.474	-0.373621	0.106124	-3.5206	0.000430565	0.0069026
ebi	1180.67	-0.373094	0.0999115	-3.73424	0.000188284	0.00383896
Atg9	853.264	-0.371754	0.149053	-2.49411	0.0126274	0.0694161
Cad99C	1040.52	-0.370727	0.135895	-2.72805	0.00637105	0.044572
mAcon1	14864.1	-0.370166	0.13901	-2.66288	0.0077475	0.050159
Hacl	536.209	-0.369452	0.133439	-2.76869	0.00562816	0.0412576
Nup205	785.266	-0.368748	0.1391	-2.65095	0.0080266	0.051398
PyK	14543.1	-0.368546	0.0869577	-4.23822	2.253e-05	0.000816539
Vps39	455.238	-0.368352	0.123744	-2.97674	0.00291335	0.0261273
CG7627	1533.66	-0.367216	0.109012	-3.36857	0.0007556	0.0102166
CG7766	8784.94	-0.366305	0.0935027	-3.91758	8.94407e-05	0.00224592
CG6218	632.532	-0.366285	0.127302	-2.8773	0.00401099	0.0326404
sgll	475.279	-0.365928	0.148095	-2.47091	0.013477	0.0727204
CG6512	2329.04	-0.365712	0.133337	-2.74277	0.00609225	0.04318
CG2277	420.362	-0.36532	0.115923	-3.15141	0.00162483	0.0176027
Ugt302C1	746.004	-0.364692	0.152631	-2.38936	0.0168776	0.0849591
Nep2	904.166	-0.364584	0.141631	-2.57418	0.0100477	0.0598103
CG4313	542.133	-0.364487	0.122144	-2.98408	0.00284436	0.0256722
CG13654	1518.96	-0.364019	0.101674	-3.58026	0.000343257	0.00595911
CG32100	335.297	-0.363885	0.144166	-2.52407	0.0116005	0.0658301
GlcAT-I	372.693	-0.362929	0.133475	-2.71907	0.00654655	0.0452149
mal	417.677	-0.362428	0.129164	-2.80596	0.00501663	0.0384059
MetRS	790.063	-0.362157	0.151046	-2.39767	0.0164998	0.0835809
Stat92E	14257	-0.361059	0.0910547	-3.9653	7.33027e-05	0.00191595
Pi3K59F	781.116	-0.360869	0.13249	-2.72375	0.00645454	0.0448881
eIF2D	376.705	-0.360622	0.145934	-2.47113	0.0134685	0.0727204
AP-1-2beta	3280.8	-0.359111	0.10994	-3.26643	0.00108915	0.0132717
bark	1382.69	-0.358887	0.11555	-3.10591	0.00189695	0.0197299
Dhc64C	19174.4	-0.358828	0.117797	-3.04616	0.00231785	0.0224784
Pex6	694.874	-0.358664	0.119984	-2.98926	0.00279654	0.0254508
CG43163	712.367	-0.358586	0.143958	-2.4909	0.0127419	0.0699364
RpS4	7640.95	-0.35775	0.116092	-3.0816	0.00205888	0.0208288
CG13248	1450.37	-0.354927	0.150766	-2.35417	0.0185643	0.0903915
Irp-1A	1032.94	-0.354831	0.109569	-3.23844	0.00120185	0.0142824
CRAT	810.436	-0.353953	0.135172	-2.61854	0.00883077	0.0550924
Rab3-GAP	686.925	-0.351365	0.146288	-2.40187	0.0163117	0.0829265
CG1233	1194.44	-0.351161	0.100032	-3.5105	0.000447264	0.00708768
Top3alpha	301.486	-0.350801	0.145777	-2.40642	0.0161098	0.0824364
Mdr49	1500.22	-0.35068	0.152102	-2.30556	0.0211352	0.0982164
CG8520	530.091	-0.349111	0.148317	-2.35381	0.018582	0.0904153
SIDL	776.513	-0.349084	0.105509	-3.30856	0.000937769	0.0120099
Vps15	1060.75	-0.346642	0.108479	-3.19547	0.00139602	0.0159341
verm	541.437	-0.346491	0.140641	-2.46365	0.013753	0.0736462
Urod	937.54	-0.346376	0.145879	-2.3744	0.0175776	0.0867173
Ankle2	1633.86	-0.345813	0.0859186	-4.0249	5.70003e-05	0.00158407
CG5281	817.111	-0.345761	0.119223	-2.90012	0.00373014	0.0308549
Wdfy2	764.181	-0.345505	0.135456	-2.55067	0.0107515	0.0624744
CG7987	2832.02	-0.345392	0.0900122	-3.83717	0.000124459	0.00283219
Map205	5170.89	-0.345167	0.064708	-5.33423	9.5951e-08	1.07084e-05
Vha100-2	2449.14	-0.344431	0.133867	-2.57294	0.010084	0.0598822
Cpsf160	624.252	-0.343797	0.117978	-2.91408	0.00356734	0.029947
yin	839.813	-0.343541	0.127918	-2.68563	0.00723927	0.048568
CG4752	1052.87	-0.343349	0.146246	-2.34774	0.0188877	0.0913965
GLS	995.55	-0.342967	0.12604	-2.7211	0.00650645	0.0450708
GCS1	1132.89	-0.342853	0.131897	-2.5994	0.00933881	0.0569246
GC1	679.389	-0.342301	0.107781	-3.17588	0.0014938	0.0166978
LRP1	14754.4	-0.342185	0.0735444	-4.65277	3.27508e-06	0.000184216
Prosbeta6	592.064	-0.341982	0.136326	-2.50857	0.0121222	0.0676975
CG4041	775.586	-0.34126	0.125583	-2.7174	0.00657979	0.045311
alc	1500.83	-0.341121	0.115579	-2.9514	0.00316336	0.0275608
TfIIA-L	962.526	-0.340812	0.0945082	-3.60616	0.000310761	0.00554361
Tes	304.804	-0.34058	0.145307	-2.34386	0.0190853	0.0919733
CG8569	365.463	-0.340519	0.130355	-2.61225	0.0089948	0.0556712
mthl8	794.635	-0.340519	0.139057	-2.44878	0.0143343	0.0760008
Pfk	6061.59	-0.340492	0.0875878	-3.88744	0.000101307	0.00249051
ebo	1662.72	-0.340023	0.102798	-3.30768	0.000940732	0.012026
Rab30	463.557	-0.339565	0.135884	-2.49893	0.0124568	0.0686342
a6	698.5	-0.339485	0.120121	-2.82618	0.00471064	0.0366803
Syx16	373.874	-0.338817	0.141985	-2.38629	0.0170191	0.0853847
Wdr59	681.63	-0.338636	0.100229	-3.37863	0.000728473	0.00992614
Sec71	2980.13	-0.337664	0.0959344	-3.51974	0.000431965	0.0069026
CG9062	762.296	-0.337334	0.108269	-3.1157	0.00183507	0.0193405
Strip	1554.25	-0.336855	0.0987907	-3.40978	0.000650142	0.00912197
e	1534.42	-0.336203	0.143275	-2.34655	0.0189482	0.0915362
RhoGAP92B	1785.48	-0.335407	0.0867189	-3.86775	0.000109842	0.00260913
Neurl4	1531.85	-0.335131	0.105683	-3.17109	0.00151869	0.0168461
Usp1	3056.04	-0.334641	0.0832931	-4.01763	5.87864e-05	0.00162727
hiw	19843.9	-0.333849	0.105185	-3.17393	0.00150389	0.0167839
cry	2693.75	-0.333435	0.134672	-2.47591	0.0132898	0.072155
CG1354	1193.57	-0.332854	0.0953462	-3.49101	0.000481201	0.00745226
CG1888	739.205	-0.331971	0.112718	-2.94515	0.00322802	0.0279166
Chc	10347.2	-0.331736	0.0926894	-3.57901	0.000344899	0.00597288
rig	634.595	-0.331367	0.11993	-2.763	0.00572725	0.0415681
CG2004	774.468	-0.329759	0.140796	-2.34211	0.019175	0.0920898
CG6184	1781.52	-0.328516	0.114676	-2.86474	0.00417349	0.0336512
Stt3A	1021.57	-0.3283	0.112786	-2.91083	0.00360474	0.0300652
Ror	469.76	-0.327462	0.138901	-2.35751	0.0183978	0.0897886
CG14883	438.386	-0.326369	0.141973	-2.29881	0.0215158	0.0991834
AlaRS-m	533.345	-0.326058	0.116225	-2.8054	0.00502538	0.0384059
FeCH	722.123	-0.326048	0.141143	-2.31005	0.0208856	0.0975077
CG30394	505.859	-0.32604	0.134353	-2.42674	0.0152351	0.0792291
AcCoAS	19108.7	-0.325801	0.0974467	-3.34338	0.000827648	0.0109036
CalpB	1054.41	-0.325681	0.0865004	-3.76508	0.000166493	0.00352595
Cerk	2223.03	-0.325228	0.0940745	-3.45713	0.00054596	0.00809841
rdog	1566.11	-0.325096	0.137522	-2.36395	0.0180812	0.0886531
Tsp86D	454.101	-0.324919	0.140093	-2.3193	0.0203788	0.0959699
MRP	8385.94	-0.324774	0.0815307	-3.98346	6.79189e-05	0.00181573
CG15111	1062.64	-0.324769	0.0913133	-3.55665	0.000375615	0.00635166
Nbr	495.241	-0.324152	0.134657	-2.40724	0.0160736	0.0823116
Dhap-at	1291.34	-0.32351	0.115434	-2.80254	0.00507015	0.0385809
CG42233	501.305	-0.323473	0.11093	-2.91602	0.00354525	0.0298522
Cat	4970.91	-0.322996	0.124436	-2.59569	0.00944025	0.0574173
CG4078	494.482	-0.322937	0.137405	-2.35025	0.0187607	0.0910329
RpII140	1243.26	-0.322244	0.119729	-2.69145	0.0071143	0.0479584
tst	597.481	-0.322027	0.126074	-2.55427	0.010641	0.0620374
Hel89B	3780.8	-0.321968	0.0805649	-3.99638	6.43185e-05	0.00174604
CG7483	465.194	-0.321583	0.12995	-2.47466	0.0133362	0.0723507
FASN1	103502	-0.321339	0.105594	-3.04315	0.00234117	0.0226217
MICU3	1996.8	-0.321182	0.0787893	-4.07647	4.57243e-05	0.00137977
Ttc7	1642.24	-0.320374	0.0990224	-3.23537	0.00121486	0.01438
Lrrk	3616.73	-0.320079	0.113361	-2.82353	0.00474977	0.0368199
CG8613	1743.41	-0.318878	0.0953831	-3.34313	0.000828388	0.0109036
Plekhm1	564.528	-0.318055	0.11683	-2.72236	0.00648168	0.0449879
nemy	623.876	-0.317425	0.133666	-2.37476	0.0175604	0.0867076
Dh44-R2	1058.8	-0.315157	0.117794	-2.67549	0.00746196	0.049269
modSP	1291.19	-0.314801	0.132009	-2.3847	0.017093	0.085599
Syt12	1769.32	-0.314502	0.101012	-3.11352	0.00184869	0.0193948
CG10274	458.001	-0.314363	0.117499	-2.67545	0.00746287	0.049269
Sec5	966.634	-0.31435	0.112826	-2.78615	0.00533389	0.0397714
fz4	448.01	-0.310428	0.130617	-2.37662	0.0174721	0.0865432
Alas	2200.51	-0.309445	0.12269	-2.52217	0.0116633	0.06597
CDC50	1362.43	-0.309382	0.101744	-3.04078	0.00235967	0.0226973
fliI	1579.23	-0.309183	0.0898158	-3.44242	0.000576539	0.00837529
CG10413	1486.48	-0.3091	0.097934	-3.15621	0.00159834	0.0173962
CG8155	1250	-0.30897	0.0892509	-3.46182	0.000536534	0.00800928
sl	878.262	-0.308842	0.116472	-2.65165	0.00800994	0.051398
stck	1277.81	-0.308774	0.101741	-3.0349	0.00240616	0.0229256
Lint-1	491.781	-0.308199	0.124278	-2.47991	0.0131417	0.0715205
MED1	1852.03	-0.308007	0.0874226	-3.5232	0.000426376	0.0068758
Ac78C	1569.66	-0.307808	0.118004	-2.60845	0.00909536	0.0560961
eIF3m	1822.42	-0.307759	0.120842	-2.54679	0.0108719	0.0629659
GstD1	3877.77	-0.307728	0.114852	-2.67934	0.00737674	0.0490736
CG6145	2390.82	-0.306189	0.127253	-2.40614	0.0161223	0.0824407
Herc4	3230.84	-0.305794	0.0860235	-3.55477	0.000378312	0.0063612
CG7065	1619.92	-0.305713	0.102158	-2.99255	0.00276655	0.0253027
RyR	11273.6	-0.30492	0.130987	-2.32786	0.0199198	0.0944787
Gcn5	1002.34	-0.304316	0.10406	-2.92441	0.00345105	0.0292694
Tusp	4739.73	-0.303841	0.0890158	-3.41334	0.000641724	0.00911507
SP1173	2452.9	-0.303641	0.113218	-2.68191	0.00732036	0.0488795
Myo10A	2597.8	-0.303185	0.127363	-2.38048	0.0172901	0.0859393
LRR	4686.67	-0.302441	0.079866	-3.78685	0.000152567	0.00333136
kel	1836.27	-0.302153	0.098196	-3.07704	0.00209066	0.0209692
Sra-1	1730.86	-0.301371	0.103876	-2.90126	0.00371668	0.0308132
isopeptidase-T-3	518.045	-0.300259	0.112871	-2.66019	0.00780968	0.0504468
Cad86C	1047.93	-0.297862	0.110395	-2.69815	0.0069725	0.0471835
CG9426	1300.82	-0.297116	0.0953727	-3.11531	0.0018375	0.0193405
ClC-b	891	-0.295821	0.0962617	-3.07309	0.00211854	0.0211606
Mekk1	2545.04	-0.294993	0.115299	-2.5585	0.0105124	0.0616969
CG2701	690.104	-0.294437	0.12776	-2.30461	0.0211885	0.0983344
GlnRS	696.866	-0.294236	0.127141	-2.31426	0.0206537	0.0967058
CAH7	853.064	-0.294217	0.123451	-2.38327	0.0171598	0.0856892
RpL3	11820.8	-0.292865	0.12467	-2.34913	0.0188171	0.0912436
xmas	706.489	-0.291135	0.112234	-2.594	0.00948655	0.057649
CG1582	865.959	-0.290699	0.116332	-2.49886	0.0124593	0.0686342
CG7430	4190.25	-0.289774	0.108937	-2.66003	0.00781348	0.0504468
coro	2656.87	-0.289582	0.118268	-2.44853	0.0143441	0.0760008
CG4562	1901.25	-0.288947	0.113143	-2.55383	0.0106547	0.0620654
Hpr1	448.297	-0.288569	0.121956	-2.36617	0.017973	0.088246
sotv	974.69	-0.288326	0.113158	-2.54801	0.010834	0.0628495
Wee1	1294.93	-0.288258	0.116323	-2.47808	0.013209	0.0717716
CG2698	2330.81	-0.287248	0.0946165	-3.03591	0.00239809	0.0229256
CG42271	2011.37	-0.286904	0.103193	-2.78028	0.00543123	0.0402715
htt	6669.69	-0.28688	0.0668967	-4.28841	1.79956e-05	0.00069939
D19B	836.161	-0.285579	0.118752	-2.40484	0.0161798	0.0826143
Mad	2365.77	-0.284797	0.0809015	-3.5203	0.000431061	0.0069026
Pex3	841.167	-0.28467	0.10285	-2.76782	0.00564322	0.0412576
CG34120	9529.28	-0.284223	0.103102	-2.75673	0.0058382	0.0419717
Ranbp16	1881.16	-0.283791	0.0958862	-2.95966	0.00307978	0.0271052
Gabat	2835.07	-0.282535	0.116532	-2.42453	0.0153282	0.0794782
CG33298	3814.94	-0.281373	0.062012	-4.5374	5.69525e-06	0.000283995
Sccpdh1	4220.63	-0.281253	0.110539	-2.54438	0.0109473	0.0631425
2024-09-01	688.701	-0.280781	0.0961073	-2.92153	0.00348313	0.0294349
CG8370	1210.62	-0.28057	0.101214	-2.77206	0.00557036	0.0409506
CG8726	2062.33	-0.280323	0.115397	-2.42922	0.0151315	0.0788653
CG18476	431.904	-0.278895	0.109817	-2.53962	0.0110972	0.0637453
poe	22175.1	-0.278168	0.0759475	-3.66263	0.00024964	0.00471833
Kank	2117.92	-0.278035	0.102353	-2.71642	0.00659915	0.0453998
Oatp30B	5385.02	-0.277651	0.0902457	-3.07661	0.00209369	0.0209697
cbs	902.168	-0.27741	0.0924441	-3.00084	0.00269237	0.0248
Rbcn-3A	14852.7	-0.27572	0.083263	-3.31144	0.00092818	0.0119524
Hrd3	1144.86	-0.275682	0.108913	-2.53121	0.0113671	0.0649773
CG12163	5987.39	-0.274804	0.115761	-2.3739	0.0176013	0.0867236
vari	1714.65	-0.27422	0.104929	-2.61338	0.00896518	0.0555368
CG8475	2035.22	-0.274171	0.0908624	-3.01742	0.00254932	0.0237844
morgue	571.851	-0.273887	0.118814	-2.30518	0.0211567	0.0982514
Diap2	1502.33	-0.273028	0.0982014	-2.78029	0.00543106	0.0402715
Grip91	670.238	-0.272385	0.110249	-2.47064	0.013487	0.0727204
Elys	1847.53	-0.271871	0.109497	-2.48291	0.0130312	0.0710804
CG10254	2006.02	-0.271273	0.0859948	-3.15453	0.00160759	0.0174698
kto	2245.38	-0.269622	0.111362	-2.42113	0.0154723	0.080073
CG11771	1063.3	-0.269371	0.112644	-2.39136	0.0167862	0.0846061
Vps53	610.041	-0.269104	0.103532	-2.59924	0.00934305	0.0569246
Sec8	1388.43	-0.268776	0.100137	-2.68409	0.00727279	0.0486536
Rme-8	2835.04	-0.268593	0.0891533	-3.01271	0.00258924	0.0240806
Vps16A	675.344	-0.266825	0.114087	-2.33878	0.0193466	0.0927238
anchor	4070.81	-0.266301	0.0891555	-2.98692	0.00281801	0.025567
Nrx-IV	3281.44	-0.266277	0.0825211	-3.22677	0.00125195	0.0145495
CG7611	2615.95	-0.265693	0.0766788	-3.46502	0.00053019	0.00795995
CG3651	880.011	-0.264028	0.100577	-2.62514	0.00866126	0.0542273
CG10132	3381.03	-0.263479	0.0994403	-2.64962	0.00805833	0.0515542
LIMK1	3399.23	-0.263005	0.0794444	-3.31055	0.000931139	0.0119686
nonC	3310.94	-0.262585	0.106388	-2.46818	0.0135803	0.0730049
CG8839	1525.27	-0.261644	0.108135	-2.41961	0.0155371	0.0801478
CG11658	1518.11	-0.260196	0.082013	-3.17262	0.00151073	0.0168215
Edem1	1412.6	-0.259389	0.0996469	-2.60308	0.00923894	0.0565353
Rift	973.164	-0.259389	0.0925575	-2.80246	0.00507139	0.0385809
Sema5c	846.678	-0.259387	0.107188	-2.41993	0.0155233	0.0801353
bwa	771.527	-0.259102	0.111427	-2.3253	0.0200558	0.0947661
CG17528	2483.3	-0.25642	0.092715	-2.76568	0.00568043	0.0414161
unc80	21812.6	-0.255089	0.0910322	-2.80219	0.00507572	0.0385809
Piezo	4974.8	-0.254389	0.0774726	-3.2836	0.00102489	0.0128163
polybromo	1259.24	-0.253967	0.077446	-3.27929	0.0010407	0.0128804
sgl	903.029	-0.252989	0.105497	-2.39807	0.0164817	0.0835807
Itpr	8280.96	-0.252536	0.0832113	-3.03487	0.00240636	0.0229256
alpha-Spec	22213.9	-0.25223	0.0790701	-3.18995	0.00142297	0.0161517
rictor	2638.1	-0.25153	0.0911283	-2.76017	0.00577711	0.0417808
Pi4KIIIalpha	9812.53	-0.249242	0.0830649	-3.00056	0.00269481	0.0248
AIF	874.806	-0.249188	0.105823	-2.35478	0.0185338	0.0903059
Prestin	1137.52	-0.248522	0.0903421	-2.7509	0.00594316	0.042509
Rubicon	778.535	-0.248446	0.0996331	-2.49361	0.0126452	0.0694598
CG10737	7470.51	-0.248227	0.0942815	-2.63282	0.0084678	0.0534925
CG9044	2147.9	-0.247679	0.076447	-3.23988	0.0011958	0.0142503
CG9164	1164.54	-0.247604	0.0989117	-2.50328	0.0123048	0.0680332
gry	1523.43	-0.247301	0.106093	-2.33099	0.0197541	0.0940361
Gycalpha99B	3450.84	-0.246567	0.0964533	-2.55634	0.0105781	0.0618149
Eno	15271	-0.245888	0.0897564	-2.73951	0.00615315	0.043393
eEF2	41249.9	-0.245619	0.0887441	-2.76772	0.00564497	0.0412576
CG6659	1288.21	-0.245564	0.103401	-2.37488	0.0175549	0.0867076
rump	2313.56	-0.245393	0.0689325	-3.5599	0.000371	0.00630072
Nup98-96	2533.93	-0.244926	0.0961179	-2.54819	0.0108284	0.0628495
lin	787.811	-0.244644	0.106417	-2.29892	0.0215094	0.0991834
pix	3206.67	-0.243537	0.103576	-2.35128	0.0187087	0.0908433
Sec23	3174.39	-0.243527	0.0795893	-3.0598	0.00221485	0.0218728
Mvl	1990.27	-0.24327	0.0909874	-2.67367	0.00750271	0.0493928
Cand1	1644.13	-0.243047	0.0971304	-2.50228	0.0123398	0.0681548
PKD	3309.52	-0.242715	0.0766504	-3.16651	0.00154278	0.017002
Exn	5767	-0.241842	0.0753447	-3.20981	0.00132821	0.0152842
l(3)76BDm	1093.58	-0.241489	0.100984	-2.39135	0.0167864	0.0846061
AMPdeam	5545.2	-0.240527	0.0629957	-3.81815	0.000134455	0.0030203
CG34133	1854.59	-0.240184	0.0736335	-3.26188	0.00110675	0.0134004
Hmt-1	1419.02	-0.240022	0.101601	-2.36239	0.0181573	0.0889119
Sbf	2296.66	-0.239497	0.093001	-2.57521	0.0100179	0.0597423
Ufd4	14670.5	-0.238888	0.0703073	-3.39777	0.00067938	0.00938452
CG1640	7172.68	-0.238636	0.0707079	-3.37496	0.000738265	0.0100207
Brf	596.914	-0.238358	0.100234	-2.37802	0.0174057	0.0863045
DUBAI	1866.41	-0.238358	0.0931872	-2.55784	0.0105324	0.0617394
loqs	1595.28	-0.237093	0.0972583	-2.43776	0.0147785	0.0775428
CG5004	2202.65	-0.236326	0.0891399	-2.65118	0.00802107	0.051398
Nct	940.019	-0.235826	0.0981213	-2.40341	0.0162429	0.0828162
Iml1	4539.36	-0.235659	0.0881309	-2.67397	0.00749595	0.0493928
Lpin	9523.43	-0.23557	0.0754262	-3.12318	0.00178909	0.0190304
CG7600	1124.19	-0.234123	0.101854	-2.29862	0.0215266	0.0991834
shot	83024.9	-0.233905	0.0800594	-2.92164	0.00348189	0.0294349
CG9346	718.869	-0.233594	0.0962961	-2.42579	0.0152752	0.0792617
Cpsf6	2666.33	-0.233474	0.0713766	-3.27101	0.00107165	0.0131267
Reps	1602.29	-0.233261	0.0756375	-3.08393	0.00204284	0.0206963
CG34408	4078.36	-0.233002	0.0747545	-3.1169	0.00182762	0.0193233
Rpn2	2231.38	-0.232798	0.0853702	-2.72692	0.00639276	0.0446794
CG7920	9723.27	-0.232774	0.101412	-2.29533	0.021714	0.0996548
CG31637	3960.88	-0.232545	0.0772759	-3.00929	0.00261861	0.0242649
CG31678	3527.12	-0.232296	0.094753	-2.45159	0.0142225	0.0755273
Girdin	2141.47	-0.232115	0.0762783	-3.04301	0.00234228	0.0226217
CG9330	1027.28	-0.232077	0.0926025	-2.50616	0.0122049	0.0678898
PAN2	1839.08	-0.231297	0.0904884	-2.5561	0.0105853	0.0618149
CG31663	1629.39	-0.230266	0.0941565	-2.44557	0.0144624	0.0763974
Ire1	2976.75	-0.229083	0.0718867	-3.18672	0.00143895	0.0162601
Fbl6	1730.04	-0.228745	0.0953924	-2.39793	0.0164879	0.0835807
Fit1	2085.97	-0.228665	0.0772617	-2.95962	0.00308023	0.0271052
LpR1	4017.5	-0.228242	0.0962054	-2.37245	0.0176707	0.086944
CG14562	2302.2	-0.224663	0.0830827	-2.70409	0.00684921	0.0466636
atms	726.473	-0.224258	0.0867037	-2.58648	0.00969609	0.0584175
gig	2455.26	-0.223366	0.0820003	-2.72397	0.00645026	0.0448881
Duba	1522.73	-0.221569	0.0860819	-2.57394	0.0100549	0.0598103
Opa1	3595.18	-0.221514	0.0742113	-2.98491	0.00283666	0.0256356
Smg6	1609.23	-0.22146	0.0839063	-2.63938	0.00830584	0.0528014
CG1317	3842.2	-0.221312	0.0926936	-2.38757	0.0169604	0.0852942
RhoBTB	2908.2	-0.219976	0.0820522	-2.68093	0.00734181	0.0489756
CG17019	1132.59	-0.21974	0.0955822	-2.29896	0.0215073	0.0991834
fry	12643.3	-0.219306	0.0770488	-2.84632	0.00442278	0.0350977
CG30020	1603.68	-0.219211	0.0928613	-2.36063	0.0182438	0.0892019
ALiX	2632.48	-0.218091	0.0937562	-2.32615	0.0200104	0.0947431
Ltn1	2199.32	-0.217609	0.0754251	-2.8851	0.00391291	0.0319161
Nulp1	969.896	-0.217089	0.0930827	-2.33221	0.0196894	0.09385
Plp	6522.43	-0.216471	0.0810541	-2.6707	0.00756936	0.0495532
CG11399	2474.1	-0.216468	0.0830598	-2.60617	0.00915619	0.0562338
tkv	6631.13	-0.215743	0.0863108	-2.49961	0.012433	0.0686157
CG8858	1512.2	-0.215101	0.0766657	-2.80571	0.00502063	0.0384059
Zir	4926.85	-0.213802	0.0864292	-2.47372	0.0133713	0.0724856
CG1090	5965.5	-0.213382	0.0916703	-2.32771	0.0199277	0.0944787
CG6454	3711.83	-0.212631	0.060016	-3.54291	0.000395734	0.00648287
Hmgcr	1566.34	-0.211323	0.0906194	-2.33198	0.0197017	0.09385
arr	5041.58	-0.210465	0.0813863	-2.58599	0.00970984	0.0584502
TBPH	1785.29	-0.210226	0.0899616	-2.33684	0.0194476	0.0930327
Myo95E	2429.7	-0.208591	0.0777774	-2.6819	0.00732046	0.0488795
Megf8	3245.69	-0.20775	0.0778073	-2.67006	0.00758372	0.049601
CG31688	3842.38	-0.207132	0.0766451	-2.70248	0.00688246	0.0467994
CG5521	3327.77	-0.206842	0.074089	-2.79181	0.00524143	0.0394566
Cortactin	1056.37	-0.205874	0.083709	-2.4594	0.013917	0.0743544
ca	3405.93	-0.205762	0.0753008	-2.73254	0.00628486	0.0441447
ago	2829.16	-0.205549	0.0761747	-2.69839	0.00696763	0.0471835
CG34126	6144.05	-0.204674	0.084942	-2.40957	0.0159714	0.0820269
CG7120	1661.47	-0.203089	0.0848647	-2.39309	0.0167073	0.08434
TER94	5227.84	-0.202611	0.0875419	-2.31445	0.0206431	0.0967058
CG8485	3075.06	-0.201997	0.0791402	-2.5524	0.0106985	0.0622174
Mitofilin	3486.98	-0.201807	0.0805481	-2.50542	0.0122306	0.0679254
Set2	3190.99	-0.201468	0.0741314	-2.71771	0.0065735	0.045311
Apc	8032.52	-0.201241	0.079086	-2.54459	0.0109406	0.0631425
CG43367	6396.64	-0.200944	0.0711958	-2.82241	0.00476636	0.0368445
CG12576	2247.52	-0.199825	0.0818242	-2.44212	0.0146011	0.0769569
Smg5	4495	-0.199495	0.0736997	-2.70686	0.00679226	0.0463654
dop	8147.92	-0.199385	0.0774925	-2.57296	0.0100834	0.0598822
Atet	3709.55	-0.199315	0.0724312	-2.75178	0.00592728	0.0424386
trr	2834.43	-0.198649	0.0756272	-2.62668	0.00862214	0.054127
alpha-Man-IIb	4761.01	-0.198419	0.0677905	-2.92695	0.00342307	0.0291261
disp	1683.83	-0.197283	0.0849198	-2.32317	0.02017	0.0951143
CRMP	4159.09	-0.196493	0.0692448	-2.83766	0.00454458	0.0356618
SCAP	3797.85	-0.195068	0.0632298	-3.08507	0.00203504	0.0206769
Atg2	3009.45	-0.194475	0.0778527	-2.49798	0.0124902	0.0687157
mgl	29873.5	-0.193923	0.0478009	-4.0569	4.97287e-05	0.00145684
Msp300	179485	-0.19051	0.0772446	-2.46632	0.0136508	0.0732664
beta-Spec	23862.5	-0.188216	0.0748067	-2.51603	0.0118686	0.0666519
HUWE1	17371.9	-0.188201	0.0764711	-2.46108	0.0138521	0.074064
Gapvd1	4777.54	-0.187424	0.0701583	-2.67145	0.00755249	0.049536
Akap200	4460.5	-0.187379	0.0757723	-2.47292	0.0134015	0.0725931
CdGAPr	4706.42	-0.186971	0.0760828	-2.45747	0.013992	0.0746312
trbd	2239.13	-0.185852	0.0764321	-2.43159	0.0150325	0.078512
AMPKalpha	3006.96	-0.184998	0.0776985	-2.38097	0.0172672	0.0859393
Cad87A	3860.41	-0.182737	0.0588822	-3.10344	0.00191284	0.0197782
Pi3K68D	3067.63	-0.181342	0.0597169	-3.03669	0.0023919	0.0229256
CG2519	5947.42	-0.180807	0.0759742	-2.37985	0.0173199	0.0859393
Epg5	2805.14	-0.178431	0.0745223	-2.39433	0.0166508	0.0841635
drpr	3560.76	-0.175652	0.0690337	-2.54444	0.0109453	0.0631425
Sfmbt	1456.94	-0.175579	0.0763179	-2.30062	0.0214129	0.0991141
Vps13	5324.42	-0.173219	0.0524837	-3.30043	0.000965363	0.0122739
Pkn	8756.8	-0.172752	0.070303	-2.45725	0.0140006	0.0746312
ATP8A	9124.65	-0.17122	0.0637903	-2.6841	0.00727251	0.0486536
jar	9921.44	-0.170471	0.0680334	-2.50569	0.0122211	0.0679254
didum	4894.7	-0.161237	0.0613967	-2.62614	0.00863583	0.0541505
IntS6	2930.5	-0.160708	0.0691501	-2.32404	0.0201231	0.0949568
rhea	15611.4	-0.159073	0.0621019	-2.56149	0.0104225	0.0612716
CG2747	10152.9	-0.158794	0.0604198	-2.62818	0.00858441	0.0539383
Bruce	20596.7	-0.152752	0.0641461	-2.38131	0.017251	0.0859393
Sec31	3555.46	-0.152494	0.0654936	-2.32838	0.019892	0.0944787
CG10631	8001.35	-0.151936	0.0627533	-2.42116	0.0154709	0.080073
Tak1	1846.44	-0.145303	0.0598852	-2.42636	0.0152512	0.0792545
Ubr1	10127.6	-0.134744	0.0493618	-2.72972	0.0063388	0.0443906
Eps-15	5584.48	-0.134588	0.051683	-2.6041	0.00921151	0.0564657
smg	3372.01	-0.131535	0.0545039	-2.41331	0.0158084	0.0813683

## Sheet: 1h-AT WH TIG
	baseMean	log2FoldChange	lfcSE	stat	pvalue	padj
CG16743	382.514	1.87728	0.251056	7.47753	7.57296e-14	7.6065e-11
fit	478.123	1.74838	0.34328	5.09315	3.52171e-07	5.50248e-05
atk	597.306	1.69157	0.200457	8.43855	3.21289e-17	5.64746e-14
Nep7	383.078	1.68811	0.238419	7.08045	1.43686e-12	1.12251e-09
Agpat4	169.859	1.63534	0.262856	6.22143	4.92649e-10	1.92434e-07
LanB2	1040.14	1.59485	0.14488	11.0081	3.49411e-28	2.45671e-24
CG9498	1255.59	1.36812	0.142894	9.57431	1.02535e-21	3.60463e-18
CG30033	200.726	1.27681	0.326999	3.90464	9.43659e-05	0.00526577
Tig	2638.26	1.25559	0.235846	5.32377	1.0164e-07	1.93143e-05
CG31777	283.446	1.21073	0.342741	3.5325	0.000411655	0.0154472
CG5958	954.895	1.16576	0.186601	6.24734	4.17499e-10	1.72673e-07
MFS9	394.654	1.13388	0.195759	5.79222	6.94607e-09	1.95351e-06
BomS1	372.582	1.12297	0.391865	2.86572	0.00416063	0.0715243
Fib	216.605	1.11686	0.245436	4.55053	5.35101e-06	0.00053747
CG5955	579.104	1.11155	0.199631	5.56803	2.57635e-08	6.03811e-06
CG6429	195.415	1.04994	0.270912	3.87557	0.000106377	0.00575335
CG34228	162.418	1.01819	0.237699	4.28351	1.83964e-05	0.00148673
Lst	1005.95	1.0085	0.276352	3.64934	0.000262915	0.0114108
CG9436	1282.5	0.977144	0.155287	6.2925	3.12398e-10	1.46431e-07
CG13360	477.547	0.977135	0.189976	5.14345	2.69733e-07	4.51545e-05
gammaSnap1	158.552	0.973333	0.291106	3.34357	0.00082708	0.0247537
CG8654	897.115	0.951924	0.184604	5.15658	2.51505e-07	4.31301e-05
l(1)G0020	178.887	0.931537	0.201553	4.6218	3.80418e-06	0.00040206
Apoltp	19386.2	0.929836	0.141215	6.58454	4.56309e-11	2.67359e-08
CG4115	173.948	0.918967	0.293953	3.12624	0.00177058	0.0416353
CG2065	178.668	0.912796	0.229308	3.98066	6.87242e-05	0.00427611
CG1628	560.073	0.908502	0.196923	4.61349	3.95966e-06	0.000409417
CG8665	2082.08	0.892379	0.173899	5.13159	2.87302e-07	4.69772e-05
Irp-1B	2467.19	0.878978	0.137131	6.40975	1.45759e-10	7.3202e-08
Nph	177.141	0.877586	0.233182	3.76352	0.00016754	0.00812117
Nop60B	501.478	0.871445	0.121395	7.17858	7.04384e-13	6.19065e-10
Pisd	2887.08	0.869566	0.145766	5.96551	2.43875e-09	7.79404e-07
MsrA	1051.25	0.864832	0.112476	7.68906	1.48223e-14	2.08431e-11
Hr38	6533.7	0.856239	0.167337	5.11685	3.10672e-07	4.9644e-05
Elal	606.234	0.853319	0.192617	4.43013	9.41772e-06	0.000894811
daw	1682.99	0.847836	0.220009	3.85365	0.000116371	0.00600827
CG32276	1381.33	0.832468	0.133242	6.24778	4.16339e-10	1.72673e-07
CG12811	313.104	0.832047	0.201992	4.11921	3.80168e-05	0.00269996
Sardh	515.853	0.828272	0.238098	3.47871	0.000503841	0.0179823
CG5773	877.262	0.826401	0.192768	4.28703	1.81076e-05	0.0014804
Prx2540-2	246.229	0.82316	0.233083	3.53161	0.000413039	0.0154472
loj	213.06	0.817027	0.211892	3.85586	0.000115322	0.00600612
CG30151	140.17	0.808529	0.227763	3.54987	0.000385415	0.0150547
CG6142	391.381	0.799624	0.170277	4.69603	2.65272e-06	0.000296052
CG8051	571.222	0.798568	0.22768	3.50741	0.000452494	0.0165702
Zip89B	381.143	0.796911	0.202034	3.94444	7.99853e-05	0.00476591
sr	2816.41	0.796136	0.130299	6.11009	9.95767e-10	3.33392e-07
RpLP0-like	201.132	0.796085	0.199072	3.99898	6.36151e-05	0.00406616
CG31248	233.213	0.777029	0.21855	3.55538	0.00037743	0.0148252
CG15202	335.325	0.769905	0.196696	3.91418	9.07118e-05	0.00514351
CG16820	175.35	0.76877	0.239508	3.20979	0.0013283	0.0339611
tim	12229.6	0.763166	0.150202	5.08095	3.75556e-07	5.74029e-05
alpha-Est8	2732.76	0.754682	0.121556	6.20851	5.34888e-10	1.97937e-07
CG15019	205.476	0.745447	0.216918	3.43653	0.000589218	0.0199608
srl	695.054	0.739545	0.124495	5.94036	2.84394e-09	8.69379e-07
mRpL18	150.121	0.725137	0.212945	3.40527	0.000660981	0.0213759
Cyp4d21	3573.38	0.717552	0.218294	3.28709	0.00101228	0.0275867
RpII18	167.28	0.716447	0.21572	3.32119	0.000896338	0.0256185
CG13185	1921.91	0.711397	0.102785	6.92122	4.47779e-12	2.86212e-09
Sod3	982.099	0.71029	0.15718	4.51895	6.21482e-06	0.000606895
mRpL19	180.125	0.709424	0.191998	3.69495	0.000219928	0.00966448
CG7800	229.373	0.700257	0.226957	3.08542	0.00203267	0.0450843
CG2811	217.535	0.693578	0.184814	3.75285	0.000174835	0.00825008
CG7560	211.336	0.691767	0.205611	3.36445	0.000766973	0.0236517
Gnmt	4080.94	0.688733	0.218577	3.15098	0.00162723	0.0395493
CG14688	886.55	0.688528	0.190957	3.60567	0.000311343	0.0128768
CG4968	259.629	0.685249	0.170933	4.00888	6.10071e-05	0.00393524
Col4a1	4629.6	0.685063	0.182519	3.75337	0.000174472	0.00825008
Sec61gamma	396.008	0.683833	0.161044	4.24626	2.17372e-05	0.00171724
COX8	1219.54	0.682293	0.156213	4.3677	1.25563e-05	0.00114654
CrebA	2343.03	0.681883	0.135524	5.03145	4.86793e-07	7.08078e-05
CG9922	206.22	0.679644	0.223111	3.04622	0.00231741	0.0495315
nclb	241.109	0.677012	0.161796	4.18435	2.85988e-05	0.00218563
ImpL2	868.988	0.675259	0.189867	3.55649	0.000375838	0.0148252
CG5849	269.628	0.67376	0.223233	3.01819	0.00254287	0.0525851
Obp99c	7222.58	0.669044	0.245609	2.72402	0.00644929	0.0933759
CG13364	346.315	0.669034	0.201275	3.32398	0.000887426	0.0256044
CG33296	196.643	0.661431	0.219941	3.00731	0.0026357	0.0537733
su(r)	1676.15	0.660566	0.172249	3.83495	0.000125592	0.00630742
PCB	17632.4	0.652895	0.123572	5.28354	1.26712e-07	2.34451e-05
Sec61beta	772.44	0.646494	0.116906	5.53005	3.2014e-08	7.26098e-06
CG5033	310.628	0.644171	0.163399	3.94231	8.07007e-05	0.00476812
dmrt99B	147.338	0.639991	0.234816	2.72549	0.00642052	0.0933759
out	1037.63	0.626981	0.135572	4.62471	3.7512e-06	0.00040206
CG6870	1448.69	0.625447	0.180823	3.45889	0.000542405	0.0191641
Ent2	680.728	0.625078	0.144793	4.31705	1.58131e-05	0.00137262
RpS21	2331.94	0.616267	0.221911	2.77709	0.00548478	0.0851291
CG13096	263.853	0.615569	0.172705	3.56428	0.00036486	0.0144958
CG3597	845.406	0.611244	0.186366	3.2798	0.00103881	0.0282004
Ppn	7439.84	0.610949	0.155694	3.92403	8.70813e-05	0.00497779
mRpL24	319.175	0.610686	0.175879	3.47219	0.000516226	0.0183313
Dph5	199.213	0.605071	0.195412	3.09639	0.0019589	0.0441442
CG6712	166.431	0.59653	0.213714	2.79126	0.00525037	0.0829559
CG10680	2016.48	0.591979	0.177623	3.33279	0.000859813	0.0250844
Nop56	259.417	0.589871	0.179261	3.29058	0.000999826	0.0274845
pst	4152.41	0.589009	0.119713	4.92017	8.64674e-07	0.000108563
NimC1	243.276	0.585388	0.211347	2.76979	0.00560927	0.0861109
CG8303	232.635	0.582941	0.18566	3.13984	0.00169042	0.0404264
drm	293.441	0.57991	0.204432	2.8367	0.00455831	0.0764903
CG13220	473.641	0.579219	0.187533	3.08862	0.0020109	0.0450275
CG11334	689.003	0.576892	0.158465	3.6405	0.00027211	0.0117375
CG31324	3214.7	0.575528	0.148932	3.86436	0.000111379	0.00584408
Kaz1-ORFB	235.738	0.572593	0.206416	2.77398	0.00553756	0.0853987
vri	5297.35	0.570255	0.135377	4.21233	2.52745e-05	0.0019528
Sply	1069.19	0.56557	0.113315	4.99115	6.00205e-07	8.13864e-05
SelG	504.669	0.563675	0.190787	2.95447	0.00313208	0.0600045
CG1785	257.197	0.561615	0.166332	3.37648	0.000734205	0.0229439
vkg	3458.2	0.560749	0.170185	3.29494	0.000984423	0.0272499
Srp9	240.468	0.558439	0.180337	3.09664	0.00195726	0.0441442
Pfdn5	270.536	0.551216	0.166745	3.30574	0.000947245	0.0266403
CG9253	534.808	0.550543	0.136037	4.047	5.18774e-05	0.00344104
Hacd1	832.585	0.548043	0.174901	3.13345	0.00172766	0.0410378
Sec61alpha	2478.86	0.547933	0.114318	4.79305	1.64269e-06	0.000192495
Tapdelta	722.194	0.544202	0.159846	3.40453	0.00066277	0.0213759
mRpL30	298.458	0.541023	0.167418	3.23156	0.00123115	0.0320599
CG9034	478.815	0.536775	0.164512	3.26283	0.00110305	0.029377
CG14661	1907.52	0.535835	0.167677	3.19563	0.00139525	0.0347922
Srp19	218.276	0.533451	0.182349	2.92544	0.00343973	0.0633928
CG5080	1100.77	0.529179	0.160525	3.29656	0.000978775	0.0272006
NO66	278.43	0.528644	0.154836	3.41422	0.00063966	0.021038
Gk2	1326.67	0.52569	0.133268	3.94461	7.99288e-05	0.00476591
CG2608	427.182	0.525115	0.13875	3.78462	0.000153944	0.00751651
robl	271.08	0.521822	0.189818	2.74907	0.00597647	0.0892157
CG1572	751.12	0.520096	0.165201	3.14825	0.0016425	0.0395493
CG14186	6117.93	0.519811	0.0912107	5.69901	1.20508e-08	3.25882e-06
Fkbp39	300.23	0.516157	0.176462	2.92503	0.00344418	0.0633928
CG2681	382.156	0.510627	0.171573	2.97615	0.00291895	0.0571675
CG5162	1536.58	0.506975	0.162957	3.1111	0.00186392	0.0429688
per	2417.15	0.5057	0.0903843	5.595	2.20625e-08	5.34902e-06
CG7016	536.353	0.504811	0.167053	3.02186	0.00251229	0.052106
CG32694	3105.22	0.504776	0.144723	3.48789	0.000486851	0.0174645
CG3829	2461.94	0.503553	0.166625	3.02207	0.00251053	0.052106
CG17271	1182.45	0.502835	0.100756	4.9906	6.01919e-07	8.13864e-05
CG12325	233.267	0.501442	0.182665	2.74515	0.00604842	0.0897182
eIF2beta	1373.38	0.501441	0.130379	3.84601	0.000120056	0.00607278
Adi1	634.937	0.500691	0.163909	3.05469	0.0022529	0.0484408
mod	1123.94	0.499922	0.0849583	5.88432	3.99704e-09	1.17097e-06
Nnp-1	511.497	0.498877	0.134787	3.70123	0.000214553	0.00948755
Rbm13	206.449	0.49651	0.178548	2.78082	0.00542226	0.0846976
SamDC	401.591	0.494588	0.15088	3.27801	0.00104542	0.0282705
CROT	805.177	0.490482	0.120625	4.06617	4.77916e-05	0.00326236
Ostgamma	463.384	0.488635	0.160457	3.04526	0.00232476	0.0495315
CG15201	1297.84	0.485211	0.162851	2.97947	0.00288747	0.0568677
CG14894	327.648	0.4783	0.163185	2.93104	0.00337828	0.0628378
eEF1delta	1148.25	0.478098	0.140043	3.41393	0.000640325	0.021038
CG13631	1481.48	0.477008	0.159862	2.98387	0.00284629	0.0563725
Pmp70	4991.49	0.476781	0.0980882	4.86074	1.16948e-06	0.000141769
CG3036	9081.43	0.476137	0.160424	2.968	0.00299745	0.057734
CG7872	417.107	0.476039	0.143749	3.31161	0.000927624	0.0262816
vig2	1204.07	0.475246	0.111671	4.25578	2.08323e-05	0.00166446
ReepB	853.841	0.471582	0.13913	3.38951	0.000700172	0.0223769
CG4577	16135.9	0.469305	0.0951938	4.93	8.22309e-07	0.000105622
bai	522.077	0.468285	0.154399	3.03295	0.00242175	0.0511331
CG10433	5741.75	0.467497	0.146989	3.1805	0.00147021	0.0363982
Nlp	561.312	0.465033	0.162062	2.86948	0.0041115	0.0712019
CG4554	692.892	0.464091	0.124249	3.73518	0.000187582	0.0086769
Duox	425.459	0.46239	0.163831	2.82236	0.00476715	0.0782889
ergic53	1407.32	0.458304	0.120603	3.80009	0.000144644	0.00716194
CG10560	828.616	0.454961	0.16737	2.71829	0.00656193	0.0943496
Rs1	365.364	0.454546	0.159915	2.84242	0.0044773	0.0756728
Cpr67B	1907.44	0.454085	0.155946	2.91181	0.00359337	0.0649485
CG6665	291.301	0.449377	0.141163	3.18339	0.00145561	0.036164
CG11811	495.002	0.446332	0.14464	3.08581	0.00202999	0.0450843
Max	323.046	0.446279	0.161532	2.76279	0.00573092	0.0872166
Jra	850.394	0.444533	0.100249	4.4343	9.23728e-06	0.00088969
RpL24-like	1068.86	0.44368	0.106507	4.16573	3.10353e-05	0.00234633
jeb	14570.2	0.441782	0.131777	3.35249	0.000800869	0.0243762
SsRbeta	620.476	0.441666	0.15156	2.91414	0.00356675	0.0647867
Sec63	1265.61	0.441117	0.082307	5.35941	8.34939e-08	1.67727e-05
wdp	2603.8	0.440938	0.132504	3.32774	0.000875548	0.0254379
bic	6591.27	0.439546	0.129045	3.40615	0.00065886	0.0213759
Gs2	19077.3	0.438567	0.120909	3.62723	0.000286473	0.0122116
CG12355	399.497	0.437397	0.162606	2.68993	0.00714675	0.0993009
CNBP	6150.92	0.437246	0.148878	2.93693	0.00331475	0.0619841
CG1532	331.234	0.436271	0.161365	2.70363	0.00685865	0.0978157
CG32091	487.836	0.435783	0.12678	3.43732	0.000587501	0.0199608
Fkbp14	1415.36	0.43467	0.133735	3.25023	0.00115312	0.0304796
Tep3	658.024	0.432695	0.123838	3.49405	0.000475751	0.0171539
CG11378	590.272	0.432434	0.152783	2.83037	0.00464935	0.0770981
spz	867.908	0.431151	0.115889	3.72038	0.000198924	0.00902345
Myo31DF	1343.06	0.430594	0.118816	3.62403	0.000290049	0.0122116
KdelR	1307.52	0.430576	0.122326	3.51991	0.000431685	0.0160591
p24-1	550.428	0.427571	0.141477	3.0222	0.00250942	0.052106
cv-d	3116.01	0.421138	0.154813	2.7203	0.00652237	0.0939729
CG13784	8741.89	0.421033	0.0751514	5.60247	2.11317e-08	5.30632e-06
slf	2369.07	0.419903	0.119479	3.51445	0.000440658	0.0162213
CG13887	1950.05	0.41848	0.142991	2.92662	0.00342665	0.0633928
CG31694	3021.4	0.417071	0.101457	4.1108	3.94293e-05	0.00274482
CG32278	552.097	0.415194	0.153397	2.70666	0.00679637	0.0971245
CG2199	411.408	0.412026	0.141591	2.90997	0.00361463	0.0651652
CG17193	806.701	0.411636	0.124707	3.30082	0.000964041	0.0269866
Fer1HCH	5057.78	0.411604	0.11929	3.45044	0.000559664	0.0195771
CG1236	270.731	0.411037	0.152446	2.69629	0.00701168	0.0986674
Atf3	5821.57	0.408523	0.0949383	4.30304	1.68471e-05	0.00144454
GstE3	964.693	0.405694	0.140551	2.88645	0.00389621	0.0684412
CG8414	273.107	0.40528	0.145734	2.78095	0.00541999	0.0846976
Jafrac1	2412.9	0.40462	0.12622	3.20569	0.00134741	0.034214
CG31997	691.957	0.404381	0.145273	2.78359	0.00537603	0.0846976
CG17574	685.631	0.401906	0.117815	3.41134	0.000646436	0.0211399
l(3)77CDf	2706.42	0.397545	0.0919123	4.32526	1.52352e-05	0.00134803
CG7272	703.167	0.392501	0.119289	3.29033	0.00100072	0.0274845
akirin	1668.66	0.392112	0.0906873	4.32378	1.53381e-05	0.00134803
Nmd3	515.071	0.389645	0.139212	2.79894	0.00512704	0.081557
pit	581.127	0.389171	0.122556	3.17545	0.00149604	0.0369075
D2hgdh	4427.69	0.386935	0.137339	2.81738	0.00484168	0.0789348
Surf4	1634.13	0.382378	0.122232	3.1283	0.00175823	0.041566
CG10960	6595.99	0.374306	0.0807276	4.63666	3.5408e-06	0.000388991
eIF3j	1488.88	0.370723	0.104899	3.53409	0.000409183	0.0154472
CG7530	1688.12	0.370408	0.124668	2.97115	0.00296685	0.057734
Rab6	1137.5	0.368529	0.110506	3.33494	0.000853188	0.0250398
NUCB1	3658.22	0.368359	0.128493	2.86676	0.004147	0.0714646
vsg	10617.3	0.368283	0.127493	2.88865	0.003869	0.0681777
Glut4EF	8713.87	0.366928	0.133073	2.75735	0.00582728	0.0879154
Rab11	3466.23	0.366076	0.0904054	4.04927	5.13771e-05	0.00344031
CG32344	391.163	0.364743	0.134706	2.70769	0.00677536	0.0970215
beta4GalNAcTA	552.248	0.363284	0.129612	2.80285	0.00506527	0.0814964
CG9837	1607.05	0.362478	0.108206	3.34989	0.000808442	0.0245007
CG32647	9910.65	0.362144	0.108477	3.33844	0.00084249	0.0250398
Usp8	1284.24	0.358243	0.0952296	3.76189	0.000168638	0.00812117
Trx-2	1932.82	0.355941	0.111128	3.20297	0.00136016	0.0342453
alpha-Est10	764.038	0.353511	0.129256	2.73498	0.0062385	0.091381
gol	6069.6	0.351824	0.0772998	4.55142	5.32844e-06	0.00053747
CG6805	1017.37	0.351471	0.130356	2.69624	0.00701267	0.0986674
Dp1	8616.21	0.349811	0.0656138	5.33136	9.74814e-08	1.90387e-05
CG11076	1065.36	0.349525	0.122569	2.85166	0.00434919	0.0738627
Hex-A	9107.87	0.347958	0.114249	3.0456	0.00232213	0.0495315
bark	1382.69	0.34704	0.114633	3.02739	0.00246672	0.0519266
sty	5718.5	0.33683	0.100987	3.33538	0.000851835	0.0250398
Hmgs	1517.89	0.336086	0.106968	3.14193	0.00167837	0.0402752
Mapmodulin	3103.39	0.333303	0.0932687	3.57358	0.00035213	0.0142732
CG44247	10612.1	0.332845	0.0969083	3.43464	0.000593344	0.0199608
subdued	1556.94	0.332432	0.0939662	3.53778	0.000403508	0.0154188
Sam-S	9285.35	0.327882	0.0625909	5.23849	1.61899e-07	2.91875e-05
Nopp140	772.198	0.327337	0.10652	3.07301	0.00211908	0.0463172
Alg1	549.808	0.32731	0.12161	2.69147	0.0071137	0.0990424
RpI1	585.544	0.32603	0.116391	2.80117	0.00509176	0.0815494
Tom40	1165.39	0.323543	0.0923442	3.50366	0.000458904	0.0167179
l(1)G0320	2714.83	0.322471	0.0904432	3.56545	0.000363232	0.0144958
tok	6207.57	0.320787	0.0828537	3.87172	0.000108069	0.0057563
RabX1	532.086	0.318472	0.118314	2.69174	0.00710809	0.0990424
Tudor-SN	2820.25	0.318282	0.0741915	4.29001	1.78668e-05	0.00147845
Mkp3	7105.26	0.315304	0.0977158	3.22675	0.00125206	0.0324843
CG11857	1650.17	0.314183	0.107366	2.92629	0.00343035	0.0633928
Naa30A	1190.79	0.314174	0.108402	2.89822	0.00375282	0.0666316
bur	2163.79	0.31359	0.0662325	4.73468	2.19401e-06	0.000248808
CG32425	4684.22	0.312286	0.0921288	3.38967	0.00069977	0.0223769
glec	2465.56	0.312272	0.110505	2.82588	0.00471514	0.0776397
Sec22	1067.35	0.311323	0.10848	2.86987	0.00410638	0.0712019
Kr-h2	1364.32	0.307312	0.105981	2.89968	0.00373546	0.0664911
aop	3934.21	0.305084	0.0980632	3.11109	0.00186396	0.0429688
CG10576	1446.18	0.301364	0.10988	2.74266	0.00609431	0.0901818
msk	2275.9	0.296714	0.0744894	3.9833	6.7964e-05	0.00426656
Arf79F	4688.72	0.292216	0.0759645	3.84674	0.0001197	0.00607278
CG8814	1519.87	0.291901	0.0926832	3.14945	0.0016358	0.0395493
eIF1A	4835.69	0.291214	0.0980624	2.96968	0.00298107	0.057734
Men	16159.1	0.290275	0.0940147	3.08755	0.00201811	0.0450455
eRF3	2780.73	0.289128	0.0659137	4.38647	1.15205e-05	0.00108
Pect	4242.1	0.286904	0.0725322	3.95554	7.6363e-05	0.00470972
CG9911	966.475	0.285939	0.0969401	2.94964	0.00318141	0.0602925
Tsp42Ee	2850.42	0.284652	0.0877512	3.24385	0.00117925	0.0309376
Oda	15148	0.276288	0.0981631	2.81459	0.004884	0.0793058
Trp1	2771.06	0.268533	0.0930512	2.88586	0.00390342	0.0684412
Mnt	8598.69	0.268323	0.0973378	2.75662	0.00584031	0.0879154
Pu	2818.92	0.26384	0.0958504	2.75262	0.005912	0.088441
Hydr2	1903.81	0.263066	0.0819284	3.21092	0.00132311	0.0339519
PAPLA1	7940.42	0.261023	0.0865522	3.01579	0.00256313	0.0526941
U2af50	1141.32	0.256003	0.0895337	2.85929	0.00424584	0.0725255
Vha16-1	36239.9	0.250096	0.0886327	2.82171	0.00477683	0.0782889
Rab10	1926.25	0.243679	0.0906545	2.68799	0.0071883	0.09949
Gp210	1744.13	0.240133	0.0847546	2.83327	0.00460743	0.0766795
roq	3072.69	0.227739	0.0673298	3.38244	0.000718448	0.0228571
CG6330	2718.7	0.227279	0.0834052	2.725	0.00643018	0.0933759
Dic1	1508.33	0.225004	0.0793821	2.83445	0.00459053	0.0766651
CG11050	2916.75	0.223322	0.0742886	3.00614	0.00264587	0.0537733
oys	4493.33	0.200594	0.0613999	3.267	0.00108694	0.0291691
eIF4G1	13280.5	0.199864	0.0649943	3.0751	0.00210434	0.0462362
Su(dx)	4103.13	0.193639	0.054772	3.53537	0.000407211	0.0154472
Moe	10576.5	0.191676	0.0709774	2.70053	0.00692299	0.0983344
svr	9625.78	0.179819	0.0587107	3.0628	0.00219279	0.0474384
bel	7264.14	0.165776	0.053355	3.10703	0.00188974	0.0432795

## Sheet: 1h-AT WH TRG
	baseMean	log2FoldChange	lfcSE	stat	pvalue	padj
tobi	13366.6	-2.04845	0.273763	-7.48256	7.28895e-14	7.6065e-11
CG31075	1603.2	-1.55039	0.182292	-8.505	1.81598e-17	4.25605e-14
PH4alphaNE1	100.303	-1.33754	0.400907	-3.3363	0.000849015	0.0250398
Dr	840.401	-1.33127	0.288134	-4.62033	3.83132e-06	0.00040206
CG13796	183.036	-1.13005	0.235456	-4.7994	1.59143e-06	0.000189649
lectin-28C	592.532	-1.09293	0.29176	-3.74598	0.000179688	0.00836682
CG16898	786.948	-1.08712	0.199002	-5.46285	4.68547e-08	1.0005e-05
Cad96Cb	130.179	-1.08624	0.278801	-3.89609	9.77564e-05	0.00536973
CG3999	845.061	-1.07633	0.219363	-4.90659	9.26715e-07	0.000114311
alpha-Est2	350.043	-1.00579	0.200004	-5.02883	4.93469e-07	7.08078e-05
CG18302	361.499	-1.00004	0.197157	-5.07233	3.9298e-07	5.87882e-05
CG13318	215.234	-0.990094	0.238104	-4.15825	3.20699e-05	0.00237351
defl	193.034	-0.958472	0.210897	-4.54473	5.50062e-06	0.000544716
CG8745	1300.99	-0.851342	0.121142	-7.02765	2.10041e-12	1.4768e-09
CG13101	143.936	-0.849301	0.215742	-3.93664	8.26287e-05	0.00484136
Sodh-1	5052.85	-0.83279	0.200269	-4.15836	3.20537e-05	0.00237351
CG9626	200.13	-0.828261	0.29404	-2.81684	0.00484993	0.0789348
Got2	5247.02	-0.803765	0.141313	-5.68785	1.28647e-08	3.35007e-06
CG5793	650.666	-0.794495	0.161186	-4.92907	8.26227e-07	0.000105622
Gart	6413.17	-0.781655	0.268273	-2.91365	0.00357229	0.0647867
CG11241	728.653	-0.750513	0.137395	-5.46246	4.69585e-08	1.0005e-05
UGP	3342.69	-0.746919	0.156175	-4.78259	1.73054e-06	0.000199466
CG9664	446.019	-0.735093	0.207771	-3.538	0.000403169	0.0154188
CG7135	859.781	-0.734026	0.17417	-4.21443	2.50415e-05	0.0019528
CG9485	2955.53	-0.716728	0.179726	-3.98789	6.66644e-05	0.00422268
Galk	3953.06	-0.694089	0.175819	-3.94776	7.88874e-05	0.00476591
CG3699	1601.29	-0.683417	0.226565	-3.01643	0.00255774	0.0526941
CG14892	186.287	-0.68135	0.21262	-3.20454	0.00135279	0.034214
mTerf5	173.098	-0.678749	0.182285	-3.72355	0.000196438	0.00896855
hgo	406.229	-0.673184	0.177395	-3.79483	0.000147743	0.00726422
CG10494	178.325	-0.660559	0.184887	-3.57277	0.000353227	0.0142732
CG6511	512.848	-0.65015	0.131264	-4.95299	7.3081e-07	9.69495e-05
gt	353.303	-0.635743	0.148194	-4.28992	1.78734e-05	0.00147845
GatA	194.706	-0.629774	0.205257	-3.06822	0.00215338	0.0467296
CG6654	524.31	-0.627941	0.199315	-3.1505	0.00162991	0.0395493
bgm	2783.19	-0.623743	0.164133	-3.80022	0.000144569	0.00716194
CG12182	183.42	-0.613643	0.186631	-3.28801	0.001009	0.0275867
CG31689	9192.22	-0.613251	0.218109	-2.81167	0.00492853	0.0798445
Cyp6g1	4157.4	-0.612429	0.205658	-2.9779	0.00290235	0.0570012
TpnC25D	949.318	-0.607575	0.205848	-2.95157	0.00316161	0.0600791
Got1	4227.15	-0.597247	0.0974645	-6.12784	8.90812e-10	3.13165e-07
CG3376	2208.31	-0.593463	0.194083	-3.05777	0.00222987	0.0480927
Mdr65	1502.48	-0.591558	0.147129	-4.02068	5.80313e-05	0.00381325
Jabba	1831.73	-0.590329	0.175011	-3.3731	0.000743257	0.023094
Clk	2667.25	-0.58833	0.149744	-3.9289	8.53342e-05	0.00494493
ATPCL	14437	-0.5855	0.0908271	-6.44631	1.14605e-10	6.19838e-08
GlyS	2820.25	-0.567718	0.13009	-4.36403	1.27685e-05	0.00115097
CG16789	291.131	-0.552272	0.154552	-3.57337	0.000352419	0.0142732
Ice1	408.261	-0.54697	0.131891	-4.14713	3.36667e-05	0.00246573
Spat	1236.65	-0.539119	0.162843	-3.31066	0.000930751	0.0262816
Faa	469.734	-0.537638	0.144716	-3.71513	0.000203103	0.00909566
geko	291.844	-0.531739	0.189283	-2.80923	0.00496605	0.0802673
CG7724	466.566	-0.530708	0.170872	-3.10589	0.00189708	0.0433063
CG16863	217.091	-0.530661	0.192586	-2.75544	0.00586127	0.0879154
Hpd	3243.29	-0.530169	0.149829	-3.53849	0.000402418	0.0154188
CG10137	765.252	-0.520137	0.126352	-4.11659	3.84518e-05	0.00270355
CG4282	309.025	-0.512033	0.1599	-3.20221	0.00136377	0.0342453
Cog2	366.455	-0.508119	0.150421	-3.37799	0.000730179	0.0229439
calypso	251.996	-0.504164	0.163943	-3.07525	0.00210327	0.0462362
Pgi	7212.17	-0.504156	0.0932431	-5.40689	6.41269e-08	1.32611e-05
Gbs-76A	3056.9	-0.503418	0.100408	-5.01373	5.33856e-07	7.50709e-05
Kr-h1	5145.39	-0.501733	0.128316	-3.91013	9.22452e-05	0.00518861
Shmt	4423.6	-0.500238	0.182622	-2.7392	0.00615886	0.090592
Ugt37D1	561.334	-0.490881	0.151878	-3.23207	0.00122895	0.0320599
mib1	2170.8	-0.490166	0.0944313	-5.19072	2.09487e-07	3.68226e-05
CG10257	394.745	-0.486061	0.144689	-3.35934	0.000781283	0.0239878
Rhp	515.487	-0.480717	0.121786	-3.94723	7.90605e-05	0.00476591
CG7504	464.577	-0.46767	0.115298	-4.05619	4.98789e-05	0.0033721
AGBE	1765.48	-0.4666	0.128648	-3.62695	0.000286789	0.0122116
GlyP	12058.4	-0.466439	0.11262	-4.14169	3.44751e-05	0.00249891
CG7737	323.55	-0.464295	0.154363	-3.0078	0.00263145	0.0537733
stet	257.861	-0.459517	0.166385	-2.76178	0.0057488	0.0872998
CG11191	1136.16	-0.459294	0.123762	-3.7111	0.00020636	0.00918304
TyrRII	236.307	-0.458677	0.170235	-2.69438	0.00705202	0.0988098
Ugt49C1	482.986	-0.456357	0.14767	-3.09039	0.00199893	0.0449025
CG7966	940.369	-0.448826	0.148328	-3.02589	0.00247899	0.0520291
a	5621.06	-0.447212	0.130123	-3.43684	0.000588542	0.0199608
Su(fu)	382.987	-0.446226	0.148815	-2.99853	0.00271286	0.0546537
SCOT	638.021	-0.446098	0.138765	-3.21478	0.00130543	0.0336208
bmm	3377.52	-0.444588	0.151271	-2.93903	0.00329242	0.0618957
Gbs-70E	7375.59	-0.432335	0.150183	-2.87872	0.00399296	0.0694913
CtIP	450.395	-0.431741	0.147983	-2.91751	0.00352834	0.0646035
Taldo	3267.16	-0.430712	0.153855	-2.79946	0.00511874	0.081557
XRCC1	311.462	-0.416375	0.148334	-2.80702	0.00500024	0.0806347
Prp38	287.841	-0.413336	0.147756	-2.79742	0.00515125	0.0815963
Stip1	1318.3	-0.408885	0.113599	-3.59936	0.000319004	0.0131165
CG14414	364.287	-0.407728	0.145609	-2.80016	0.00510766	0.081557
ERR	418.738	-0.405561	0.138329	-2.93187	0.00336932	0.0628374
CG30440	494.417	-0.405124	0.145983	-2.77515	0.00551764	0.0853987
AOX3	3092.61	-0.404794	0.108473	-3.73175	0.000190152	0.00873831
CG18011	330.722	-0.404467	0.149047	-2.7137	0.00665374	0.0954744
U2af38	414.683	-0.403632	0.133527	-3.02286	0.00250399	0.052106
cu	1278.24	-0.401971	0.13087	-3.07153	0.00212963	0.0463574
Cyp12a4	1325.39	-0.401855	0.135417	-2.96754	0.00300192	0.057734
Lap1	1904.25	-0.399691	0.0995016	-4.01693	5.89615e-05	0.0038385
FoxP	2776.19	-0.396254	0.143423	-2.76284	0.00573005	0.0872166
CG10077	47650.6	-0.393102	0.091616	-4.29076	1.78065e-05	0.00147845
Zw	1137.07	-0.3894	0.133639	-2.91383	0.00357024	0.0647867
CG42724	5060.92	-0.384392	0.0992718	-3.87212	0.000107893	0.0057563
nbs	432.249	-0.382028	0.141908	-2.69209	0.00710056	0.0990424
PIG-S	353.357	-0.380373	0.130979	-2.90408	0.0036834	0.0662352
ZnT77C	365.734	-0.378086	0.119821	-3.15542	0.00160269	0.0392632
jumu	768.522	-0.36944	0.122996	-3.00368	0.00266732	0.0540458
tey	385.232	-0.365644	0.128781	-2.83927	0.00452162	0.0760729
CG7766	8784.94	-0.364768	0.0935485	-3.89923	9.64976e-05	0.00534232
RyR	11273.6	-0.364292	0.131032	-2.78018	0.00543289	0.0846976
CG16896	483.973	-0.364181	0.130946	-2.78114	0.00541679	0.0846976
Tnpo-SR	468.347	-0.361755	0.132817	-2.72371	0.00645525	0.0933759
Hr4	1178.51	-0.360731	0.1303	-2.76846	0.00563225	0.0862752
Plap	499.809	-0.356884	0.132214	-2.69928	0.00694892	0.0985037
Tace	1214.11	-0.35674	0.101462	-3.51601	0.000438091	0.0162117
CG7148	422.895	-0.354551	0.130055	-2.72617	0.00640736	0.0933759
D19B	836.161	-0.351927	0.119348	-2.94876	0.00319049	0.060302
Stat92E	14257	-0.350855	0.0910798	-3.85218	0.000117072	0.00600827
DhpD	934.665	-0.350502	0.120854	-2.9002	0.00372923	0.0664911
Grip84	721.869	-0.350327	0.104779	-3.34348	0.000827352	0.0247537
Hsp83	16545.6	-0.350296	0.100254	-3.49409	0.000475678	0.0171539
pasha	570.643	-0.34592	0.106503	-3.24798	0.00116229	0.0306068
SIDL	776.513	-0.345824	0.105965	-3.26356	0.00110023	0.029377
CG3645	700.891	-0.344302	0.116036	-2.96719	0.00300536	0.057734
CG31368	767.474	-0.342699	0.106518	-3.21728	0.00129414	0.0334526
CG4294	4112.75	-0.338146	0.101062	-3.34593	0.000820084	0.0247468
CG9044	2147.9	-0.336183	0.0768208	-4.3762	1.20768e-05	0.00111727
Su(var)3-7	1180.45	-0.333836	0.0849977	-3.92758	8.58032e-05	0.00494493
Sec5	966.634	-0.332565	0.113228	-2.93713	0.00331263	0.0619841
CG18476	431.904	-0.327596	0.110925	-2.9533	0.00314398	0.0600688
GstZ2	905.997	-0.327569	0.117801	-2.7807	0.00542424	0.0846976
Ars2	2883.64	-0.327375	0.0802826	-4.07779	4.54663e-05	0.00313406
ZC3H3	633.548	-0.322461	0.111489	-2.89233	0.00382399	0.0676287
Grip91	670.238	-0.321925	0.110962	-2.90121	0.00371724	0.0664911
ABCB7	1106.36	-0.321764	0.103507	-3.10862	0.00187964	0.0431887
Ucp4A	1009.32	-0.317888	0.0948194	-3.35256	0.000800665	0.0243762
CG31211	8181.37	-0.31681	0.0956231	-3.31311	0.000922644	0.0262636
CG18135	10365.8	-0.316403	0.114722	-2.758	0.00581558	0.0879154
Gnf1	721.701	-0.31318	0.0955719	-3.2769	0.00104953	0.0282729
Pde8	7369.32	-0.308888	0.0830884	-3.71758	0.000201139	0.00906543
CG7879	1344.09	-0.308755	0.0797918	-3.8695	0.000109057	0.00576524
CG10283	1453.04	-0.307914	0.0970336	-3.17327	0.0015073	0.0370554
nkd	4678.1	-0.3067	0.110403	-2.778	0.0054694	0.0850782
CG7065	1619.92	-0.306129	0.102391	-2.98981	0.00279151	0.0556009
CG3655	2608.49	-0.304967	0.103306	-2.95209	0.00315635	0.0600791
Nop17l	2887.44	-0.304151	0.0783773	-3.8806	0.000104199	0.00567926
Rnb	643.9	-0.302217	0.0995752	-3.03506	0.00240487	0.0509296
MED1	1852.03	-0.300331	0.0876414	-3.42682	0.000610699	0.0204468
Smyd4-4	669.776	-0.299512	0.107071	-2.79733	0.00515272	0.0815963
Saf-B	6788.23	-0.298958	0.0795224	-3.75942	0.000170307	0.00814577
CG32809	12257.1	-0.29489	0.0893638	-3.29989	0.000967235	0.0269866
PyK	14543.1	-0.293652	0.0869703	-3.37647	0.000734231	0.0229439
vlc	1840.07	-0.28959	0.0965377	-2.99977	0.00270188	0.0545888
SF1	3666.98	-0.284289	0.0825796	-3.44261	0.000576131	0.0199546
bs	1025.82	-0.282086	0.101718	-2.7732	0.00555073	0.0853987
CG30089	6798.17	-0.281867	0.0819471	-3.43962	0.00058253	0.0199608
Tusp	4739.73	-0.28059	0.0890984	-3.14921	0.00163712	0.0395493
CG30020	1603.68	-0.279247	0.0932189	-2.9956	0.00273904	0.0548667
Msp300	179485	-0.279019	0.0772496	-3.61191	0.000303945	0.0127205
mim	10068.2	-0.2788	0.0918357	-3.03586	0.00239854	0.0509296
CG9330	1027.28	-0.276291	0.0931055	-2.96751	0.00300222	0.057734
ebi	1180.67	-0.276129	0.100016	-2.76085	0.00576514	0.0873592
Pih1D1	1985.21	-0.27541	0.0943298	-2.91965	0.00350426	0.0643302
lic	808.499	-0.27243	0.0961674	-2.83287	0.0046132	0.0766795
nito	1640.64	-0.269161	0.0862906	-3.11924	0.00181317	0.0422627
sick	17763.3	-0.267314	0.0821216	-3.2551	0.00113353	0.0300749
CG6227	837.87	-0.266448	0.0831242	-3.20542	0.00134865	0.034214
Su(var)2-HP2	3776.34	-0.266065	0.0774631	-3.43474	0.000593122	0.0199608
LRR	4686.67	-0.265628	0.0799486	-3.32248	0.000892202	0.0256044
CG4887	3904.39	-0.26512	0.0849377	-3.12135	0.00180027	0.0421923
Rassf	1091.45	-0.264266	0.0783651	-3.37224	0.000745604	0.023094
Girdin	2141.47	-0.263954	0.0765687	-3.44729	0.000566239	0.0197091
Ythdc1	6126.97	-0.261465	0.0933145	-2.80198	0.00507907	0.0815318
zf30C	1253.76	-0.260416	0.0884555	-2.94403	0.00323967	0.0610674
unc80	21812.6	-0.260205	0.0910554	-2.85765	0.00426785	0.0726568
CG6923	2386.25	-0.259332	0.0896728	-2.89198	0.00382822	0.0676287
scrib	29961.3	-0.256506	0.0684374	-3.74803	0.000178226	0.00835405
rump	2313.56	-0.25344	0.0691867	-3.66313	0.000249151	0.0108806
LRP1	14754.4	-0.251315	0.0735551	-3.4167	0.000633861	0.0210221
aralar1	4207.86	-0.249836	0.0801926	-3.11545	0.00183663	0.0426182
fipi	9279.08	-0.24864	0.0922236	-2.69606	0.0070166	0.0986674
spri	7981.05	-0.247313	0.0863559	-2.86388	0.00418485	0.071765
vap	1989.22	-0.247092	0.0797295	-3.09913	0.00194091	0.044021
shot	83024.9	-0.246636	0.0800662	-3.0804	0.00206725	0.0457071
CG8485	3075.06	-0.246078	0.0793621	-3.1007	0.00193062	0.0439295
Srpk79D	3130.23	-0.244643	0.086525	-2.82742	0.00469246	0.0774476
polybromo	1259.24	-0.244056	0.0778068	-3.1367	0.00170863	0.0407233
Scm	2111.14	-0.244055	0.0782505	-3.1189	0.00181529	0.0422627
MRP	8385.94	-0.243996	0.0815547	-2.9918	0.00277335	0.055396
CG33523	2157.96	-0.243984	0.0780072	-3.12771	0.00176172	0.041566
Zn72D	3999.87	-0.242764	0.0672664	-3.60899	0.000307389	0.0127885
Pfk	6061.59	-0.242123	0.0876099	-2.76365	0.00571581	0.0872166
Iml1	4539.36	-0.241688	0.0882277	-2.73937	0.00615573	0.090592
CG32486	8054.91	-0.237814	0.0831808	-2.859	0.00424982	0.0725255
CG1646	3989.58	-0.233491	0.0730665	-3.19559	0.00139545	0.0347922
CG30116	11552.5	-0.233243	0.0846534	-2.75527	0.00586436	0.0879154
fz2	12479.1	-0.233166	0.085033	-2.74207	0.00610533	0.0901818
Myo95E	2429.7	-0.232682	0.0780148	-2.98254	0.00285864	0.0564581
Lmpt	8253.54	-0.230198	0.079363	-2.90057	0.00372482	0.0664911
sov	6208.94	-0.229737	0.0556175	-4.13066	3.61727e-05	0.0025952
Akap200	4460.5	-0.22816	0.0758991	-3.0061	0.00264622	0.0537733
MICU3	1996.8	-0.227494	0.0788683	-2.88448	0.00392061	0.0685717
PNUTS	7454.24	-0.226732	0.0797063	-2.84459	0.00444687	0.0753396
CG9776	3199.6	-0.226454	0.0661268	-3.42454	0.000615845	0.0205214
CG4266	3257.51	-0.226224	0.0624192	-3.62428	0.000289771	0.0122116
Srrm234	22327.6	-0.222964	0.0814613	-2.73706	0.00619919	0.0909948
CG31637	3960.88	-0.221964	0.0773942	-2.86797	0.00413119	0.0713672
Moca-cyp	3432.81	-0.221514	0.0760329	-2.9134	0.0035752	0.0647867
Taf1	3865.3	-0.219022	0.0614499	-3.56423	0.00036492	0.0144958
Pcf11	7506.64	-0.217944	0.0806465	-2.70246	0.00688292	0.0979632
KrT95D	9441.48	-0.216543	0.0610629	-3.54623	0.000390784	0.0151801
Calx	14190.5	-0.213283	0.0639636	-3.33444	0.000854723	0.0250398
Hsc70Cb	3977.64	-0.207635	0.0675738	-3.07272	0.0021212	0.0463172
Nup358	6391.3	-0.205779	0.0619272	-3.32293	0.000890788	0.0256044
CG14408	3940.57	-0.203885	0.074819	-2.72505	0.0064292	0.0933759
CG6454	3711.83	-0.203332	0.0601723	-3.37917	0.000727051	0.0229439
Svil	25807.2	-0.202681	0.0753661	-2.68929	0.00716051	0.0993009
htt	6669.69	-0.199785	0.0669304	-2.98497	0.00283607	0.0563289
RhoGEF3	12951.4	-0.198917	0.0705679	-2.8188	0.00482035	0.0788183
C3G	7334.97	-0.198773	0.0723761	-2.74639	0.00602551	0.0895673
Mical	20827.4	-0.198643	0.0716236	-2.77343	0.0055469	0.0853987
Sec31	3555.46	-0.195024	0.0656998	-2.96841	0.00299341	0.057734
Hcf	6069.53	-0.192708	0.0715257	-2.69424	0.00705483	0.0988098
CG14762	14073.7	-0.191909	0.0698663	-2.74681	0.00601784	0.0895673
CG43102	5165.44	-0.190547	0.0706513	-2.697	0.00699667	0.0986674
rhea	15611.4	-0.18627	0.06215	-2.9971	0.00272561	0.0547537
CG42268	13501.6	-0.182176	0.0641643	-2.8392	0.00452261	0.0760729
CG7518	5149.88	-0.181739	0.063087	-2.88076	0.00396715	0.0692135
Eps-15	5584.48	-0.179054	0.0518517	-3.45319	0.000554001	0.0194759
AMPdeam	5545.2	-0.178404	0.063049	-2.82961	0.00466042	0.0770998
DAAM	6001.18	-0.163079	0.0575346	-2.83446	0.00459032	0.0766651

## Sheet: 7h-AT WH TIG
	baseMean	log2FoldChange	lfcSE	stat	pvalue	padj
CG11854	336.335	1.4119	0.399916	3.5305	0.00041478	0.0840068
CG8654	897.115	0.940127	0.186731	5.03465	4.78733e-07	0.000486327
AOX1	5355.47	0.752913	0.208015	3.61951	0.000295156	0.0618403
CG11334	689.003	0.731558	0.156345	4.67913	2.881e-06	0.00194499
CG9498	1255.59	0.539007	0.145157	3.71326	0.000204608	0.0479027

## Sheet: 7h-AT WH TRG
	baseMean	log2FoldChange	lfcSE	stat	pvalue	padj
PGRP-SB1	1242.71	-1.46012	0.335991	-4.34572	1.38819e-05	0.00702886
Prm	4273.39	-1.17218	0.307647	-3.81014	0.000138889	0.0421944
CG3630	1054.12	-1.14621	0.299537	-3.8266	0.000129927	0.0415493
CG6910	7670.87	-1.08567	0.162313	-6.68875	2.25092e-11	1.36766e-07
CG4000	802.648	-1.06725	0.285328	-3.74043	0.000183708	0.0465088
CG5966	1529.32	-1.04939	0.250865	-4.18308	2.87583e-05	0.011649
tobi	13366.6	-0.961521	0.273573	-3.51467	0.000440296	0.0862979
h	2267.75	-0.958095	0.177534	-5.39668	6.7887e-08	0.00010312
LUBEL	2784.06	-0.925652	0.246564	-3.75421	0.000173892	0.0465088
Hpd	3243.29	-0.871947	0.15081	-5.78177	7.39199e-09	2.24569e-05
Nmdmc	1826.44	-0.815624	0.199354	-4.09134	4.28884e-05	0.0153288
CG10621	1677.41	-0.814365	0.21766	-3.74145	0.000182959	0.0465088
hgo	406.229	-0.7972	0.179947	-4.4302	9.41461e-06	0.00520029
CG11089	4339.96	-0.773642	0.15673	-4.93613	7.96868e-07	0.000691681
bmm	3377.52	-0.761399	0.15125	-5.03404	4.80244e-07	0.000486327
CG10345	3313.7	-0.752352	0.187367	-4.01539	5.93481e-05	0.0200333
CG3036	9081.43	-0.674575	0.160602	-4.20029	2.66569e-05	0.0115691
CG9451	407.608	-0.641614	0.185284	-3.46287	0.000534439	0.0986271
Paics	6055.8	-0.610655	0.161222	-3.78767	0.000152068	0.0439984
Faa	469.734	-0.61024	0.142783	-4.27391	1.92075e-05	0.00897728
Achl	3184.97	-0.592623	0.144329	-4.10606	4.02458e-05	0.0152834
CG5793	650.666	-0.564287	0.16319	-3.45785	0.000544501	0.0986271
Spat	1236.65	-0.558708	0.161747	-3.45422	0.000551896	0.0986271
Desat1	43062.4	-0.558633	0.150462	-3.7128	0.000204982	0.0479027
Prps	8182.77	-0.52019	0.115928	-4.48716	7.21782e-06	0.00438555
Got2	5247.02	-0.511569	0.141185	-3.62341	0.000290747	0.0618403
CG7778	1255	-0.462656	0.127431	-3.63065	0.000282707	0.0618403
Got1	4227.15	-0.456314	0.0974154	-4.68421	2.81047e-06	0.00194499
Pect	4242.1	-0.398449	0.0721437	-5.52299	3.33281e-08	6.75005e-05

## Sheet: 13h-AT WH TIG
	baseMean	log2FoldChange	lfcSE	stat	pvalue	padj
Cyp4e3	300.308	1.10943	0.235663	4.7077	2.50522e-06	0.00251631
CG8654	897.115	1.09238	0.185237	5.89722	3.69666e-09	1.29956e-05
dsb	4315.79	0.997966	0.239767	4.16224	3.15147e-05	0.018465
GstD9	184.747	0.968774	0.221766	4.36845	1.25134e-05	0.0109977
CG7509	159.346	0.840662	0.232241	3.61978	0.00029485	0.0860052
comm2	637.487	0.663021	0.170078	3.89833	9.68582e-05	0.0400594
CG17124	5043.39	0.524293	0.122264	4.2882	1.80128e-05	0.0115134
CG4829	1150.32	0.46748	0.129199	3.61831	0.000296535	0.0860052
Fer1HCH	5057.78	0.425014	0.119165	3.56661	0.000361624	0.0908062
CG13784	8741.89	0.308722	0.0750761	4.11212	3.92035e-05	0.0212031

## Sheet: 13h-AT WH TRG
	baseMean	log2FoldChange	lfcSE	stat	pvalue	padj
Hr38	6533.7	-1.14082	0.168622	-6.76558	1.32779e-11	9.3357e-08
CG3999	845.061	-1.06427	0.221374	-4.80755	1.52793e-06	0.00179047
Hsp23	159.597	-0.941097	0.246176	-3.82286	0.000131912	0.0488144
CG9485	2955.53	-0.712282	0.179696	-3.96382	7.37598e-05	0.0345737
CG31075	1603.2	-0.654928	0.182395	-3.59072	0.000329769	0.0860052
CG6145	2390.82	-0.611515	0.125768	-4.86225	1.1606e-06	0.00165323
CG31324	3214.7	-0.555976	0.148445	-3.74534	0.00018015	0.0603161
Taldo	3267.16	-0.554056	0.154319	-3.59032	0.000330272	0.0860052
sr	2816.41	-0.52712	0.133506	-3.9483	7.87092e-05	0.0345878
cwo	7668.58	-0.500514	0.139237	-3.5947	0.000324771	0.0860052
CG8745	1300.99	-0.467383	0.123412	-3.78718	0.000152369	0.0535654
FASN1	103502	-0.455391	0.1056	-4.31239	1.61496e-05	0.0115134
ATPCL	14437	-0.442598	0.0910752	-4.85969	1.17567e-06	0.00165323
AdSS	2188.1	-0.43346	0.106806	-4.05839	4.94117e-05	0.0248153
CG14186	6117.93	-0.396191	0.0923911	-4.2882	1.80127e-05	0.0115134
CG5191	2905.55	-0.388564	0.101177	-3.84042	0.000122823	0.0479761
Pect	4242.1	-0.383894	0.0729624	-5.26154	1.42854e-07	0.000334803
AcCoAS	19108.7	-0.359566	0.0974324	-3.69041	0.000223889	0.0715528

[truncated: 1 more sheets: 19h-AT WH TRG]
