# Supplementary material for: A memory transcriptome time course reveals essential long-term memory transcription factors.
Source: Research Square preprint supplement (doi:10.21203/rs.3.rs-5746840/v1), 2025-01-08
Supplement: Supplementary file 3 [file 4d55d064bf082da9af298eea.xlsx]

## Sheet: Sheet1
This work - 7h-DT (MB)	This work -1h-AT (MB)	Raun et al. (2024)	This work- Raun et al. (2024) overlap (n=45)	This work - Jones et al. (2018) overlap (n=27)	Raun et al and Jones et al (2018) overlap (n=22)	Overlap in at least two of three datasets (n=68)
unc-104	Apoltp	IA-2	Rbp	CG17816	IA-2	a
rut	CG4577	Vha16-1	Apoltp	Rbp	Rbp	amon
Hsc70-4	jeb	Lar	Plc21C	sdt	jeb	Apoltp
Pka-C1	tim	Gfrl	CG4577	CG5065	CG31221	atk
CG17816	Moe	Rbp	jeb	jeb	CG42795	beat-VII
Rbp	svr	jeb	CG12531	jdp	CG44247	Cdc7
sdt	dom	CG31221	CG44247	CG12531	Mid1	CG12531
Apoltp	CG13784	Ten-m	svr	CG44247	CG12531	CG13185
Plc21C	Dp1	SLO2	CG32204	sNPF	amon	CG13784
PCB	Ppn	CG42795	CG42339	Pka-R1	CG32204	CG14186
CG11319	Dmtn	CG44247	Hr38	svr	svr	CG16743
CG5065	Baldspot	Mid1	Dgk	Hex-A	ChT	CG17816
btsz	Hr38	Plc21C	CG14186	CG32204	CG8500	CG2865
CG4577	crb	CG4577	a	dac	Hr38	CG31221
rdgB	CG14186	CG12531	Octbeta3R	Hr38	beat-VII	CG32204
jeb	Atf3	mtgo	CG8500	Syngr	ome	CG3625
Rgk1	sty	CG43867	Rgl	CG8500	sr	CG42339
jdp	ome	Eip63E	CG2865	Rgl	Rgl	CG42346
kdn	raw	Trpm	sr	Ppcs	CG42346	CG42795
CG31522	Pmp70	amon	Tig	CG2865	CG2865	CG44247
plx	eIF1A	Nhe2	CG3625	CG5867	CrebA	CG4577
CG12531	Arf79F	CG32204	msk	dl	spab	CG5065
CG44247	CG32425	siz	CG8665	sr		CG5867
sNPF	chb	nwk	meng	qm		CG8500
Pka-R1	AANAT1	msn	CG13185	hec		CG8665
svr	pst	Gad1	nvy	ome		ChT
CG30158	Lsd-1	DIP1	Lgr1	CrebA		CrebA
Sam-S	aop	CG42339	Cdc7			CROT
wat	Cyp4d21	svr	MsrA			dac
Hex-A	CG5867	Hsp83	LanB2			Dgk
CG3036	Pisd	Nuak	CROT			dl
Dop1R2	Tsp42Ee	ChT	srl			Dmtn
Dp1	Tudor-SN	Apoltp	atk			hec
CG31523	Pu	CG8500	Sardh			Hex-A
Droj2	sr	hang	Nop60B			Hr38
Pxn	Trp1	CG42674	MFS9			IA-2
CG32204	alpha-Est8	Lrp4	Nep7			jdp
5-HT1A	l(3)77CDf	Dgk	CG16743			jeb
ey	Tig	Hr38	CG13784			LanB2
Elk	Irp-1B	CG13784	Dmtn			Lgr1
CG42339	per	sty	sty			meng
dac	slf	Pal2	ome			MFS9
Baldspot	CrebA	beat-VII	CrebA			Mid1
Hr38	msk	a	subdued			msk
Dgk	CG8665	CG32085	Myo31DF			MsrA
crb	CG13185	luna				Myo31DF
CG14186	CG14661	CG34370				Nep7
Syngr	Cpr67B	ome				Nop60B
a	daw	CG16758				nvy
Octbeta3R	CG9837	Octbeta3R				Octbeta3R
Mi-2	subdued	CG44837				ome
sbm	bark	CG1090				Pka-R1
CG31760	CG32276	CG2225				Plc21C
Fer1HCH	Myo31DF	sr				Ppcs
CG8500	CG9436	Dmtn				qm
oys	CG9498	Rgl				Rbp
AANAT1	tsl	rgn				Rgl
eIF3b	Cdc7	grp				Sardh
Rgl	SP1029	gol				sdt
nahoda	mod	robo3				sNPF
Ppcs	CG11313	Pli				spab
Cyp4d21	NAAT1	pico				sr
Ktl	MsrA	lncRNA:CR44909				srl
CG2865	Drip	CG14186				sty
ELOVL	LanB2	CG8910				subdued
CG31324	out	CG42346				svr
Achl	CG10939	CG1607				Syngr
CG32694	Sod3	CG2865				Tig
ClC-c	CG12746	tbc
CG5867	CG5958	CG32683
emb	Keap1	Tbh
dl	Arpc2	CoRest
CG5191	CG5773	Trim9
Pisd	ImpL2	CG3625
sr	spz	CRMP
Trp1	CG3597	lncRNA:CR45347
qm	CG10560	fid
Tig	CG17193	anchor
CG4502	CROT	ZnT63C
CG11368	alpha-Est10	Atet
metro	CG1572	Ddc
krz	Ent2	tnc
CG10947	CG9717	Mctp
Irp-1B	Ns4	Gp93
CG3625	Tg	Proc
msk	Elal	CG43689
trc	CG11550	meng
CG32547	atk	Socs36E
CG8306	ClpP	CrebA
dia	CG10055	CG13594
by	pit	Nplp1
CG8665	Nlp	CG5004
CG10550	Adgf-A	Tig
meng	Sardh	Cdc7
CG13185	egr	spab
CG14661	CG10205	msk
Cpr67B	Nop60B	CG13185
Tak1	CG17834	Pi3K21B
puml	Tsp42Eg	trn
CG1814	fit	nvy
Obp49a	CG13360	CG7058
Rgk2	CG5721	lov
CG7530	MFS9	trh
su(r)	CG6142	Adk3
cnk	CG8939	subdued
Vha36-1	CG44242	MsrA
Thor	Nep7	CG14024
CG9837	CG16743	Lgr1
CG5326	CG10553	Myo31DF
Ac78C	CG11980	CG17778
Cen	Loxl2	net
Cdc27	CG5033	TyrR
nvy	drm	FMRFaR
knrl	firl	Dh44-R1
CG32276	NimC1	Hsepi
Kr-h2	Kaz1-ORFB	LanB2
Obp56g	CG12268	Vps50
fkh	Nup54	srl
CG9436	CG31436	TTLL3A
Sec63	CG16820	CG5966
CG14277	CG31126	Kif3C
CG9498	Pex2	Act42A
COX8	CG5909	Nmdmc
Snap24	NtR	comm2
ADPS	Art3	CCT5
Lgr1	DCTN5-p25	CG16743
Cdc7		shtd
SP1029		Nop60B
mod		Hsp68
CG8042		Pfdn4
CG5080		CG15117
Irk2		CROT
Sply		Sardh
MsrA		Drice
CG42319		MFS9
LanB2		CG8665
out		fz3
CG5787		Nep7
Sod3		Gorab
CG12746		atk
Cyp4aa1		Ets21C
CG4660		Dis3
Vha14-1		CG8303
CG8654		l(2)37Cd
CG14688		Tbp
CG5773		CG2662
CG13284		Cpr47Ef
CG3597		CG2875
Hacd1		CG9733
CG5597		MtnD
lwr		CG4424
Hr51		Spt
CROT		BomT1
Vps60		Ccp84Ab
Nopp140
RpA-70
HDAC1
Ns2
CG8289
srl
CG4554
hec
CG43324
CG9717
Ns4
Rat1
Chmp1
CG9338
CG30172
Tg
Elal
CG11550
atk
RpI1
CG5955
CG8051
kni
CG1628
beta4GalNAcTA
CG9253
Sardh
SelG
CG10205
Nop60B
Lgr3
Tsp42Eg
CngA
fit
CG2921
CG15544
Syx17
CG10026
hui
ash2
MFS9
CG44242
Rbsn-5
Nep7
CG16743
CysRS
CG14407
Cyp9h1
Mat89Ba
CG14220
CG11980
Nha1
edl
CG14894
Max
CG3823
CG7900
imd
CG7133
grk
CG13096
CG4968
btl
CG8157
CG10341
