# Supplementary material for: A memory transcriptome time course reveals essential long-term memory transcription factors.
Source: Research Square preprint supplement (doi:10.21203/rs.3.rs-5746840/v1), 2025-01-08
Supplement: Supplementary file 4 [file 84b48dcd47cdb0d2d1a4146c.xlsx]

## Sheet: Selected
Cluster A
source	ID	Description	GeneRatio	BgRatio	pvalue	p.adjust < 0.05	qvalue	geneID
GO:MF	GO:0019899	enzyme binding	199/3083	430/12393	9.11e-23	5.86e-20	4.17e-20	l(3)80Fj/alc/Msp300/Trap1/pico/Cul1/CG7029/Evi5/futsch/Ccm3/pnut/Ctr9/CG2993/CG42673/SNF4Agamma/Npl4/SCCRO/ari-1/prd1/Der-2/ben/dsd/tub/mbt/IKKepsilon/CG43367/capt/hook/rdx/garz/Pak3/Raf/Su(var)205/Nedd8/Der-1/Rlip/sordd1/Lk6/arm/SCCRO4/CG11700/ZAP3/GM130/atms/Mob2/Sara/Mitofilin/Gbs-76A/BicD/GCC88/emb/Wdfy2/tral/cdm/Axn/CG4645/Tnpo/sau/ref(2)P/Nop17l/Ufd1/Atg17/wcy/Frl/spg/Rpn10/SCCRO3/RhoGAP68F…
GO:MF	GO:0030695	GTPase regulator activity	95/3083	168/12393	1.34e-18	2.87e-16	2.05e-16	CG1695/RhoGEF3/RapGAP1/loco/tbc/Evi5/siz/RhoGAPp190/Vav/eIF5/CG18659/CG9098/Dhit/RhoGAP19D/RhoGAP93B/RSG7/ArfGAP1/Bet3/CG34393/sif/garz/Rlip/Asap/GAPcenA/Cdep/ArfGAP3/drongo/Graf/Efa6/Trs31/Nf1/RtGEF/Lamtor1/vimar/vap/CG5916/spg/CG34408/C3G/RhoGAP68F/CG42795/CG5521/RN-tre/RhoGAP1A/Lamtor3/TBC1D16/CG7369/Mon1/eEF1delta/CG8155/CG3703/Sec23/Ziz/RanBP3/PsGEF/Tbc1d8-9/Rep/CenG1A/HPS4/eIF2Balpha/RhoGAP…
GO:MF	GO:0016817	hydrolase activity, acting on acid anhydrides	166/3083	376/12393	1.04734e-16	1.6836e-14	1.19893e-14	Septin2/Ras85D/comt/Trap1/CG2918/TER94/atl/Marf/RhoGAPp190/Atpalpha/Arl8/pnut/shi/Khc/CG31729/Khc-73/Rab11/CG8891/Rpt6/SPoCk/CG1598/eRF3/Ns3/Afg3l2/CCT3/ATP8A/Septin4/Aps/Nsf2/Ras64B/Rheb/ABCB7/RabX4/Eato/CCT2/Abcd3/SERCA/Rpt5/SrpRalpha/CG1703/CG17646/CG13390/Hsp60A/pix/Kif3C/CG42813/CCT6/Iswi/Hsc70Cb/CCT8/PMCA/Klp64D/DCP2/nmd/Ran/Rab3/RabX1/Atet/Lon/Hsc70-5/Rho1/Arl5/CG1824/CG33298/Rpt2/Rab4/Sar…
GO:MF	GO:0030674	protein-macromolecule adaptor activity	72/3083	128/12393	2.89853e-14	2.32969e-12	1.65903e-12	Cul1/gammaSnap1/Dora/gcl/Syx7/Use1/alphaSnap/Syx13/Kdm5/CG44085/milt/Su(var)205/cm/Hip1/cal1/AP-1gamma/Syx18/AP-1-2beta/BicD/pod1/drk/Prosap/Vti1b/slmb/AP-2sigma/gammaSnap2/Pat1/nSyb/raptor/CG17270/Bet1/Sec22/Syx6/Syx5/DCAF12/hep/Cul5/Ykt6/koi/Sarm/Vamp7/csw/cos/syd/AP-1sigma/Afti/Syx17/Aplip1/Gga/Ank/Sbf/Cul2/dsh/CG3104/ckn/Syx8/AP-2alpha/wap/cnk/sn/Pex3/Gos28/Dab/brm/Wdr59/CG8677/wek/HP1c/Gbeta…
GO:MF	GO:0003735	structural constituent of ribosome	94/3083	289/12393	0.00186089	0.0112882	0.00803861	mRpS25/mRpS23/RpL15/mRpL45/mRpL33/mRpS33/mRpL23/mRpS26/mRpL52/CG4866/mRpL27/RpS30/drosha/mRpL20/mRpL35/mRpL50/mRpL16/mRpS22/mRpL24/mRpL19/RpL36/mRpS11/mRpL21/mRpL17/CG11700/mRpL46/mRpL12/mRpL4/mRpS14/mRpL51/mRpS28/RpL27A/mRpL1/mRpL28/mRpS18A/mRpS5/mRpL3/mRpL32/RpL38/RpS26/mRpL18/mRpL37/mRpS6/mRpL43/mRpS30/mRpL39/mRpS16/mRpL40/RpL37b/RpS25/mRpS21/mRpS9/mRpL49/cav/mRpS18B/mRpS2/mRpS34/CG14817/mRpS7…
GO:MF	GO:0015078	proton transmembrane transporter activity	34/3083	86/12393	0.00185478	0.0112882	0.00803861	Vha26/Cyt-c1/lovit/blw/ATPsyngamma/ATPsynbeta/VhaSFD/Nhe2/ATPsynF/OtopLc/COX4/RFeSP/Vha44/VhaAC39-1/ATPsynD/ATPsynCF6/sun/Vha36-1/Nhe1/Vha68-1/COX5B/Nhe3/Vha100-1/Vha14-1/ATPsyndelta/VhaPPA1-1/ATPsynbetaL/ATPsynE/ATPsynO/ATPsynG/ATPsynC/UQCR-11/CG9706/VGAT
GO:BP	GO:0032543	mitochondrial translation	92/3338	111/12653	9.60742e-36	2.81882e-32	1.5119e-32	mRpS25/mRpS23/mRpL45/mRpL33/mRpS33/mRpL23/mRpS26/mRpL52/mRpL27/drosha/mRpL20/bsf/mRpL35/mRpL50/mRpL16/mRpS22/mRpL24/CG6094/mRpL19/mRpS11/mRpL21/mRpL17/mRpL46/mRpL12/mEFTs/mRpL4/mRpS14/mRpL51/GatA/mRpS28/mRpL1/mRpL28/mRpS18A/mRpS5/mRpL3/mRpL32/mRpL18/mRpL37/mRpS6/mRpL43/mRpS30/mRpL39/mRpS16/mRpL40/CG4679/mRpS21/mRpS9/mRpL49/mRpS18B/mRpS2/mRpS34/mEFG1/mRpS7/mIF2/rswl/bonsai/mRpL38/mRpL14/mRpS24/CG3…
GO:BP	GO:0045184	establishment of protein localization	254/3338	493/12653	6.89466e-34	1.01145e-30	5.42501e-31	Trp1/comt/tbc/Ripalpha/CG34404/CG2918/TER94/TSG101/GABPI/gammaSnap1/boca/Sgt/Arl8/Sec24CD/CG2993/Syx7/Use1/alphaSnap/Tango9/Syx13/Tango5/Tpst/Scamp/Vps29/Rab11/Bet3/UQCR-C1/CG1598/Sec61beta/CG31229/zetaCOP/Spase22-23/milt/EMC8-9/Pex13/EMC1/rdx/garz/Madm/deltaCOP/CG11779/bai/Nsf2/Vps45/cm/Srp19/Sec61alpha/Snx21/CG7382/Roe1/Snx27/Abl/OXA1L/sgg/AP-1gamma/CG7639/Rop/Pink1/SrpRalpha/Clbn/Spase25/Ntf-2…
GO:BP	GO:0051603	proteolysis involved in cellular protein catabolic process	203/3338	370/12653	4.82735e-32	3.54086e-29	1.89918e-29	Calr/Cnx99A/Usp7/Cul1/TER94/ALiX/CG11658/shrb/Prosbeta3/CG9003/gzl/CG1317/CG6966/Prosbeta2/gcl/UbcE2H/Prosbeta6/CG12402/Cp1/Npl4/Uba1/Xbp1/Prosbeta5/Prosalpha4/ari-1/Der-2/Cdc27/Rpt6/Usp2/Kaz/Usp47/dco/Kdm2/Rpn6/Herc4/inc/rdx/Nedd4/fzr/Usp5/not/Nedd8/RYBP/Der-1/Ufl1/EloB/sordd1/scny/Rpn7/puf/CG11700/stx/Ate1/Bruce/dmpd/alpha-Man-Ib/sgg/Rpt5/Pink1/Clbn/Ubr3/CtsF/Stam/Rad23/Axn/pic/CG7148/Prosalpha…
GO:BP	GO:0050808	synapse organization	170/3338	313/12653	2.69447e-26	6.58798e-24	3.53354e-24	DIP-lambda/plum/mnb/Frq1/Syn/CASK/nwk/baz/dpr11/Atg1/Frq2/Octbeta2R/atl/Lrp4/DIP-delta/Sac1/Nlg4/futsch/dpr18/dpr13/Atpalpha/Arl8/fz2/CG42673/dpr2/Synj/dpr1/ben/Rab11/Tbce/sff/drpr/ena/Srpk79D/Eps-15/Nedd4/C1GalTA/Pak3/dbo/Ulp1/Liprin-alpha/Nsf2/stj/jeb/Rheb/Vap33/Cip4/p38b/CG7166/Abl/beta-Spec/sgg/Sdc/Dad/Nrx-IV/ND-20/S6k/Mob2/stan/Fak/bchs/Syx18/Syn1/Nmnat/pod1/Atx2/Arp2/Nlg2/caz/Nf1/RtGEF/DIP-…
GO:BP	GO:0006091	generation of precursor metabolites and energy	123/3338	233/12653	5.16104e-18	4.58863e-16	2.46117e-16	Gapdh1/Pfk/Hex-A/SdhA/Ald1/Cyt-c1/Actbeta/ND-B14.5B/CG5214/CG7766/GC1/PyK/Atg1/Sirup/Eno/Chchd2/ND-75/CG14757/blw/FASN1/ND-B14.5A/cype/UQCR-6.4/Pgi/ATPsynbeta/SdhB/Tpi/SdhC/mAcon1/Gapdh2/Mdh1/bsf/GlyP/Gpo1/ND-B22/Idh3b/UGP/ATPsynF/Sik3/Atg3/CG9005/SdhD/GlyS/Ogdh/ScsbetaG/ND-51/CG42376/Idh3a/Cyt-c-p/COX4/UQCR-Q/ND-42/sgg/PhKgamma/Pink1/ND-20/Men/RFeSP/Tspo/levy/Gbs-76A/ND-49/COX5A/Axn/AGBE/dj-1bet…
GO:BP	GO:0007268	chemical synaptic transmission	156/3338	325/12653	2.35198e-17	1.62391e-15	8.71003e-16	nAChRalpha3/Sap47/Cbp53E/Nmdar1/Frq1/nAChRalpha2/Syn/CASK/comt/nwk/Acsl/Atg1/Frq2/scramb1/gammaSnap1/Nlg4/Syt4/5-HT7/Atpalpha/qvr/Arl8/shi/lap/alphaSnap/kcc/Syx13/Csp/Scamp/Tbce/CG6329/X11Lbeta/Ipp/Sod2/Srpk79D/stas/Cat/Nsf2/Vps45/nAChRalpha4/stj/jeb/Vap33/kek6/eIF4E1/Ih/Abl/beta-Spec/SERCA/P32/Rop/Pink1/Syx18/BicD/Nmnat/cdm/Nlg2/5-HT2A/NFAT/dj-1beta/Pgk/gammaSnap2/nSyb/na/Smn/CanB2/Rab3/Exo84/rl…
GO:BP	GO:0007163	establishment or maintenance of cell polarity	102/3338	198/12653	2.97253e-14	1.26397e-12	6.77945e-13	alc/Ras85D/loco/baz/tws/CadN/orb/TSG101/Sec24CD/Khc/Syx7/14-3-3zeta/rin/Khc-73/Rab11/hbs/spoon/sff/Dp/AMPKalpha/aop/capt/DCTN2-p50/CadN2/chb/Lkb1/Raf/sds22/nudE/sgg/lig/Kap3/stan/BicD/Parp/Pcyt1/par-1/slmb/Klp64D/Frl/msps/Ran/Exo84/msk/Dhc64C/nej/Rho1/Sec23/Dg/p130CAS/Apc/Vps4/Vang/yrt/veli/S/Eb1/Cont/Dys/Cbl/csw/ric8a/spn-F/Klp68D/Moe/Klp10A/btz/fy/Rab5/nmo/RhoBTB/mgr/Ggamma1/dsh/sano/Rab6/aPKC/…
GO:CC	GO:0098798	mitochondrial protein-containing complex	172/3309	268/12534	3.41748e-39	1.64381e-36	8.2739e-37	ND-B14.7/mRpS25/SdhA/Cyt-c1/ND-B14.5B/QIL1/mRpS23/mRpL45/mRpL33/CG17691/ND-75/blw/mRpS33/Mic26-27/CG44242/mRpL23/ATPsyngamma/EMRE/mRpS26/ND-30/ND-B14.5A/cype/mRpL52/UQCR-6.4/ATPsynbeta/Pdhb/SdhB/SdhC/mRpL27/CG40472/mRpL20/Afg3l2/mRpL35/CG31229/CG7430/ND-B22/mRpL50/mRpL16/ND-B18/ND-ACP/ATPsynF/mRpS22/mRpL24/CG6094/CG11779/SdhD/mRpL19/mRpS11/ND-51/mRpL21/mRpL17/CG7382/Roe1/mRpL46/mRpL12/mRpL4/COX4/…
GO:CC	GO:0000313	organellar ribosome	74/3309	80/12534	4.38729e-36	7.03429e-34	3.54062e-34	mRpS25/mRpS23/mRpL45/mRpL33/mRpS33/mRpL23/mRpS26/mRpL52/mRpL27/mRpL20/mRpL35/mRpL50/mRpL16/mRpS22/mRpL24/CG6094/mRpL19/mRpS11/mRpL21/mRpL17/mRpL46/mRpL12/mRpL4/mRpS14/mRpL51/mRpS28/mRpL1/mRpL28/mRpS18A/mRpS5/mRpL3/mRpL32/mRpL18/mRpL37/mRpS6/mRpL43/mRpS30/mRpL39/mRpS16/mRpL40/mRpS21/mRpS9/mRpL49/cav/mRpS18B/mRpS2/mRpS34/CG14817/mRpS7/bonsai/mRpL38/mRpL14/mRpS24/mRpL11/mRpL48/mRpL34/mRpS17/mRpL41/C…
GO:CC	GO:0031410	cytoplasmic vesicle	229/3309	440/12534	2.10008e-31	1.68356e-29	8.474e-30	Dap160/CG9132/Syn/comt/nwk/CG2747/CG1275/Frq2/TSG101/ALiX/TM9SF2/sp3/Evi5/shrb/lovit/gzl/Syt4/Sec24CD/CG7011/fz2/CG18659/lap/Syx7/alphaSnap/CG31729/dbr/Csp/Scamp/Vps29/Khc-73/prd1/Rab11/hbs/CG1902/Bet3/AMPKalpha/Vps53/zetaCOP/Vta1/Eps-15/lqf/Septin4/Fas3/hook/CG5946/Snx3/Lkb1/deltaCOP/bai/CG15760/Vps45/cm/arm/jeb/Vap33/Mvb12/Snx21/Snx27/RabX4/Hip1/AP-1gamma/CG30423/Rop/Graf/Sara/car/Trs31/AP-1-2b…
GO:CC	GO:0005794	Golgi apparatus	200/3309	377/12534	6.14796e-29	3.69646e-27	1.86057e-27	CG31145/comt/FucT6/NUCB1/atl/FucTA/Mgat2/GABPI/Evi5/siz/KdelR/CG7011/Tango9/CG31729/Tpst/CG42542/Scamp/prd1/Rab11/Cog1/spoon/ArfGAP1/Bet3/SPoCk/Taz/dsd/Pgant2/Vps53/CG3662/zetaCOP/ATP8A/aux/CG3253/Mgat4a/CG5946/garz/rho-4/Madm/deltaCOP/bai/Nsf2/Vps45/CG33129/CG15651/fwd/CG12121/CG14182/GM130/CG5934/Pgant5/AP-1gamma/CG30423/bbc/Efa6/Trs31/AP-1-2beta/BicD/gammaCOP/pod1/GCC88/CG7272/CG5510/gry/Zip99…
GO:CC	GO:0098588	bounding membrane of organelle	196/3309	370/12534	2.88333e-28	1.54098e-26	7.75634e-27	VhaAC45/CG9132/Syn/Vha26/Msp300/CG1275/TER94/TSG101/Marf/Mgat2/shrb/siz/Arl8/Sec24CD/CG7011/CG14767/VhaSFD/Scamp/Vps29/prd1/Rab11/spoon/ArfGAP1/Bet3/SPoCk/Sec61beta/zetaCOP/Pex13/Vta1/lqf/CG5946/Snx3/Rilpl/rho-4/deltaCOP/Vps45/Sec61alpha/Mvb12/Snx21/CG14182/Abcd3/AP-1gamma/CG1161/Pink1/SrpRalpha/Clbn/Sara/Tspo/Efa6/CG8860/AP-1-2beta/BicD/gammaCOP/Vha44/VhaAC39-1/CG5510/Tom7/Past1/Lamtor1/sau/CG13…
GO:CC	GO:0044391	ribosomal subunit	93/3309	177/12534	9.13406e-14	1.62722e-12	8.19039e-13	mRpS25/mRpS23/RpL15/mRpL45/mRpL33/mRpS33/mRpL23/mRpS26/mRpL52/CG4866/mRpL27/RpS30/mRpL20/mRpL35/mRpL50/mRpL16/mRpS22/mRpL24/CG6094/mRpL19/RpL36/mRpS11/mRpL21/mRpL17/CG11700/mRpL46/mRpL12/mRpL4/mRpS14/mRpL51/mRpS28/RpL27A/mRpL1/mRpL28/mRpS18A/mRpS5/mRpL3/mRpL32/RpL38/RpS26/mRpL18/mRpL37/mRpS6/mRpL43/mRpS30/mRpL39/mRpS16/mRpL40/RpL37b/RpS25/mRpS21/mRpS9/mRpL49/cav/mRpS18B/mRpS2/mRpS34/mRpS7/bonsai/…
GO:CC	GO:0043005	neuron projection	183/3309	468/12534	6.6446e-10	7.10233e-09	3.57487e-09	DIP-lambda/nAChRalpha3/Cbp53E/sli/plum/Nmdar1/mnb/nAChRalpha2/Syn/CASK/comt/CadN/orb/dpr11/Acsl/Lrp4/DIP-delta/robo3/shrb/Sac1/hdc/futsch/dpr18/Syt4/dpr13/5-HT7/Arl8/Khc/alphaSnap/kcc/dpr2/Synj/Uba1/Csp/dpr1/Scamp/Rab11/X11Lbeta/RSG7/AstC-R2/Ptp10D/drpr/ena/AGO2/Srpk79D/DCTN2-p50/chb/Nedd4/fzr/Ir76a/arm/nAChRalpha4/jeb/kek6/Nak/gukh/eIF4E1/homer/CG7166/Abl/beta-Spec/nudE/sgg/EndoA/Sdc/Rop/Ptp4E/o…
cluster B
source	ID	Description	GeneRatio	BgRatio	pvalue	p.adjust < 0.05	qvalue	geneID
GO:MF	GO:0019899	enzyme binding	230/3283	430/12393	1.12954e-33	7.19516e-31	4.87485e-31	l(3)80Fj/Msp300/CG11700/CG7029/ari-1/Cul1/Mob2/Ctr9/hep/prd1/futsch/Su(var)205/pico/Nrx-1/pnut/rl/Fmr1/SNF4Agamma/Evi5/tral/IKKepsilon/emb/dsd/Npl4/mask/alc/cdm/CG7058/GM130/CG42673/Dsor1/Golgin84/SCCRO/Fs(2)Ket/Mitofilin/Nop17l/cos/nsl1/Rlip/mbt/atms/Spred/Der-2/Lk6/ref(2)P/Pak3/CycY/csw/rdx/CG2993/syd/RhoGAP68F/CanB/CG31064/CG43367/CG9018/Tm1/PNUTS/msk/SCCRO3/CG4557/Spt6/ZAP3/Axn/Pp2C1/CanB2/Vp…
GO:MF	GO:0030695	GTPase regulator activity	103/3283	168/12393	1.51491e-21	3.21665e-19	2.17934e-19	CG42795/RSG7/CG18659/Dhit/RhoGEF3/Evi5/ArfGAP1/RhoGAP71E/ArfGAP3/RhoGAP19D/Trs31/vimar/RhoGAPp190/Rlip/Rab3-GEF/RapGAP1/Graf/CenG1A/HPS4/CG1695/CG9098/siz/RhoGAP68F/CG34408/step/RhoGAP93B/CG3703/Tbc1d8-9/pcs/tbc/Asap/HPS1/CenB1A/Efa6/drongo/Rab3GAP1/loco/Cdep/CG34393/vap/GAPcenA/GAPsec/TBC1D16/Sbf/Sos/Iml1/CG8155/eIF2Bepsilon/ca/eEF1delta/Gapvd1/Rep/sif/CG8243/PDZ-GEF/Bet5/Lamtor3/PsGEF/C3G/eIF5/…
GO:MF	GO:0016817	hydrolase activity, acting on acid anhydrides	176/3283	376/12393	7.6493e-18	9.74521e-16	6.60255e-16	Septin4/Rab3/Arl8/SPoCk/pnut/atl/Rab5/TER94/Atpalpha/CG2918/SERCA/Rab4/Septin2/Vps4/Ras85D/Afg3l2/Drp1/Iswi/shi/RhoGAPp190/cos/CG1824/CCT6/CG12567/mEFTu2/Marf/Khc/ClpX/CenG1A/CG17646/Hmt-1/comt/CG42813/eIF2gamma/eRF3/CG9281/CCT3/SrpRalpha/Nsf2/pix/kis/Rab30/Ns4/SMC1/Rab11/Ns3/Abcd3/CCT8/Rheb/RhoBTB/Hsc70Cb/Trap1/YME1L/Non1/Aps/CG13390/Hsp70Ba/Atet/bor/CCT2/PMCA/Rac1/CG31729/SMC3/Rab21/Rpt6/Sar1/R…
GO:MF	GO:0030674	protein-macromolecule adaptor activity	76/3283	128/12393	3.70605e-15	2.95094e-13	1.99931e-13	Dora/Cul1/nSyb/hep/cm/Su(var)205/wap/alphaSnap/Syx7/slmb/Sec22/drk/cos/Syx6/csw/AP-1gamma/gcl/Afti/syd/Dab/Syx13/Kdm5/Syx5/AP-2alpha/milt/Syx17/CG8677/Pat1/sn/Sbf/Syx18/CG17270/Ank/gammaSnap2/Cul5/Prosap/CG13398/brm/mbf1/g/dsh/AP-1mu/AP-1-2beta/Syx8/BicD/Vamp7/pod1/Vti1b/Rox8/cal1/HP1c/Hip1/Sec20/Bet1/Aplip1/Ykt6/AP-2mu/CG44085/Gga/dock/Sarm/Lnk/Vti1a/Use1/Cul2/CG3104/Wdr59/Faf2/ckn/DCAF12/Pex3/S…
GO:MF	GO:0050808	synapse organization	185/3534	313/12653	1.7092e-31	2.51423e-28	1.27021e-28	DIP-lambda/CASK/baz/Mob2/mnb/Nlg2/Rab3/futsch/Synj/Vap33/Syn/sff/Arl8/Nrx-1/atl/S6k/Fmr1/Atpalpha/Dys/alpha-Spec/Atx2/nwk/Ulp1/beta-Spec/Atg1/sgg/Fak/dbo/Sac1/Cip4/CG42673/Dad/fz2/stau/Nlg3/dpr10/dpr18/nsl1/Lar/Syn1/dpr11/Pak3/Abl/Srpk79D/plum/dpr12/Nmnat/par-1/C1GalTA/wrd/RhoGAP68F/dpr1/CG7166/Tbce/stj/Nedd4/sax/Nsf2/Liprin-alpha/CG34353/Lrp4/drpr/kis/Liprin-gamma/Sema1a/Frq1/Abp1/simj/dpr19/Rab…
GO:BP	GO:0051603	proteolysis involved in cellular protein catabolic process	207/3534	370/12653	1.67241e-30	1.64007e-27	8.28574e-28	CG11700/ari-1/Ndfip/Cul1/Usp7/Cnx99A/shrb/Herc4/Calr/Ufl1/Pink1/Kaz/gzl/TER94/Prosalpha4/CG7656/ALiX/stx/CG12402/Npl4/CG1317/sgg/CG7058/Ubr3/Vps4/slmb/Usp47/Prosbeta7/not/Stam/Rpn1/Cdc27/Kdm2/CG8188/scny/Der-2/ClpX/CG8209/CG9003/Kcmf1/Sou/Ufd4/CG11658/gcl/Rpn6/Bruce/rdx/CkIalpha/CG6966/Usp2/morgue/Xbp1/CG32085/CG7148/Nedd4/dmpd/Ubc7/Ntan1/pic/Prosalpha3/Prosalpha5/Clbn/inc/Axn/CG7220/CG13994/CG31…
GO:BP	GO:0045184	establishment of protein localization	254/3534	493/12653	1.43917e-29	1.05851e-26	5.34764e-27	UQCR-C1/Madm/Rab3/cm/Pink1/Arl8/Ttd14/Rab5/Tim23/TER94/Scamp/CG2918/tral/emb/Tango5/GABPI/sgg/cdm/Sec24AB/alphaSnap/Syx7/Trp1/Kap-alpha3/Fs(2)Ket/Stam/CG5447/CG8726/Syx6/CG13887/Kap-alpha1/Sec24CD/CG8841/lt/Abl/AP-1gamma/Hip14/Pex13/Spase22-23/gammaCOP/HPS4/Dhc64C/rdx/deltaCOP/comt/CG2993/Rop/Syx13/Ripalpha/Syx5/CG34404/Flo2/Hph/CG7382/CG3703/AP-2alpha/SrpRalpha/Nsf2/tbc/AdipoR/msk/car/milt/Nup50…
GO:BP	GO:1902531	regulation of intracellular signal transduction	204/3534	368/12653	2.41333e-29	1.42001e-26	7.17395e-27	Cul1/Usp7/flw/mnb/CG18659/Herc4/RhoGEF3/wap/Mnn1/CG2918/ArfGAP1/Traf6/ALiX/alpha-Spec/Atg1/raskol/sgg/alph/Sur-8/AMPKalpha/slmb/Ras85D/Sac1/Usp47/Lpin/drk/Pp2A-29B/Rlip/DopEcR/Rab3-GEF/mbt/Spred/RapGAP1/key/Pak3/raw/Kcmf1/Ufd4/wdb/rdx/CG9098/par-1/syd/CkIalpha/siz/chrb/wrd/lig/CG34408/step/sigmar/sra/Clbn/PEK/HUWE1/Efa6/dco/Rab3GAP1/Rheb/AIMP3/Uba1/Leash/Pdk1/poe/Sik3/Raf/CG34393/CG7378/vap/pyd/e…
GO:BP	GO:0007163	establishment or maintenance of cell polarity	109/3534	198/12653	6.22693e-16	2.44262e-14	1.23402e-14	baz/hbs/sff/Rab5/Dys/sgg/alc/Vps4/Syx7/AMPKalpha/slmb/Ras85D/Kap3/rin/Khc/Sec24CD/smog/sano/csw/tws/Pcyt1/Dp/Dhc64C/par-1/lig/Dg/msk/Rab11/Lis-1/RhoBTB/CadN2/Patj/loco/Moe/chb/Raf/nmo/mago/nudE/Vang/TBCB/Eb1/TSG101/Rac1/sqd/sn/Khc-73/msps/spoon/Klp68D/sds22/dsh/heph/egh/Shrm/Abi/BicD/Cont/hop/aop/Mtl/DCTN2-p50/aPKC/orb/btz/capt/p130CAS/Lkb1/nej/Apc/Klp64D/spn-F/Klp10A/Rap1/Vps15/14-3-3epsilon/sdt…
GO:BP	GO:0007268	chemical synaptic transmission	156/3534	325/12653	5.94239e-15	1.98665e-13	1.00367e-13	CASK/nSyb/Sap47/nAChRalpha2/Nlg2/Nmdar1/Syt4/Rab3/scramb1/Vap33/Syn/qvr/Pink1/Arl8/Nrx-1/rl/Fmr1/Ih/NFAT/Atpalpha/Scamp/SERCA/Dys/nAChRalpha4/alpha-Spec/nwk/beta-Spec/Atg1/cdm/alphaSnap/Nlg3/shi/CG6329/X11Lbeta/Syx6/Rab3-GEF/Abl/Srpk79D/Hip14/Nmnat/comt/Rop/Syx13/Nadsyn/wrd/Syt1/Tbce/CanB/stj/Dg/Nsf2/Syx17/Frq1/CanB2/kek6/lap/pHCl-1/Ipp/Rab3GAP1/nAChRalpha3/Cals/TBPH/Csp/chico/kcc/Pgk/Slob/stas/t…
GO:BP	GO:0031410	cytoplasmic vesicle	249/3501	440/12534	1.01482e-37	2.42543e-35	1.12165e-35	CG2747/Ndfip/nSyb/CG9132/shrb/CG18659/Septin4/Syt4/Rab3/prd1/Vap33/hbs/Syn/cm/gzl/Rab5/Evi5/Scamp/ALiX/nwk/Rab4/Sec24AB/Vps4/alphaSnap/Syx7/Trs31/AMPKalpha/olf413/Sec22/Past1/fz2/Vta1/Nhe3/Stam/lqfR/Fas3/TM9SF2/CG8726/Syx6/Rab3-GEF/Graf/Sec24CD/lt/AP-1gamma/Hip14/gammaCOP/HPS4/Afti/CG3529/deltaCOP/comt/syd/Mvl/Rop/CG7011/RhoGAP68F/Syt1/dbr/CanB/Strump/Dap160/lovit/AP-2alpha/car/Rab30/Snx17/sp3/ba…
GO:CC	GO:0005794	Golgi apparatus	210/3501	377/12534	1.39314e-30	1.6648e-28	7.69891e-29	Ndfip/CG31145/CG33129/Madm/prd1/SPoCk/atl/Fmr1/Evi5/Scamp/dsd/ArfGAP1/FucT6/alpha-Spec/GABPI/CG15651/Trs31/Sec22/GM130/CG42542/Golgin84/lqfR/KdelR/fwd/CG5447/CG9536/FucTA/CG8841/AP-1gamma/Hip14/CG7990/gammaCOP/aux/fws/Afti/Dhc64C/deltaCOP/CG12121/comt/bbc/syd/CG7011/siz/Syx5/Pgant2/step/ttv/CG8230/Nsf2/Rab30/CG4557/bai/p24-1/Vps52/NUCB1/Rab11/CG14971/clu/Mgat4a/Efa6/SppL/vib/CG15814/Taz/CLIP-190/…
GO:CC	GO:0098588	bounding membrane of organelle	203/3501	370/12534	2.0986e-28	2.00626e-26	9.27803e-27	Msp300/VhaAC45/nSyb/CG9132/shrb/prd1/Syn/Pink1/Arl8/SPoCk/Fmr1/TER94/Scamp/VhaSFD/ArfGAP1/Sec24AB/Vps4/olf413/Sec22/Past1/Golgin84/Vta1/lqfR/CG5447/CG8726/Syx6/Marf/Sec24CD/AP-1gamma/Hmt-1/Hip14/CG7990/Pex13/gammaCOP/Rilpl/HPS4/Vha26/Afti/deltaCOP/syd/CG7011/siz/Syx5/Syt1/step/Atg14/AP-2alpha/SrpRalpha/Clbn/Syx17/lqf/Rab11/Pex14/Tom40/clu/CG1161/Efa6/Abcd3/SppL/Snx3/Mvb12/CG15814/Atet/TSG101/Sar1…
GO:CC	GO:0005654	nucleoplasm	235/3501	456/12534	1.9898e-27	1.5852e-25	7.33083e-26	Ctr9/sm/S6k/Mnn1/Taf4/stx/Npl4/Mnt/Dek/sgg/CG9636/drk/Kap-alpha3/Polr2L/east/CG31301/Fs(2)Ket/CG10984/Tlk/Eaf/mam/Hcf/Hrb27C/Kap-alpha1/scny/atms/Set1/Ufd4/Clic/Kdm5/CG4452/Papss/DMAP1/Strump/Hph/CG9018/CG11030/CG14805/msk/flfl/kis/Spt6/simj/ear/CG4896/Cdk12/Wdr82/lark/CG6340/Ns3/hyx/Sap30/Sap130/osa/Mat1/CG9776/RYBP/corto/Ncoa6/EloB/CG1620/CG12605/Su(var)2-10/TBPH/Nph/Moca-cyp/escl/CG18766/ebi/C…
GO:CC	GO:0098798	mitochondrial protein-containing complex	140/3501	268/12534	2.02125e-17	8.05132e-16	3.72336e-16	Mic26-27/Cyt-c1/Tim23/mRpS25/Afg3l2/Mitofilin/ND-75/ND-ACP/UQCR-6.4/CG7430/Pdk/QIL1/mRpL23/Chchd3/mRpL45/mRpS23/mRpL38/CG7382/blw/mRpL17/mRpS11/mRpL19/mRpL34/mRpS22/Tom40/clu/ND-18/Pdha/mRpL1/ND-42/SdhA/CG6094/ND-B22/mRpL52/mRpL4/mRpL30/mRpL27/ND-B14.7/mRpS14/MICU3/ND-B15/mRpS7/ND-B18/SdhD/mRpS2/mRpL33/mRpL16/mRpS18A/cav/mRpS5/mRpS26/ND-B17.2/rswl/UQCR-C2/ND-B14.5A/ND-B16.6/scu/SdhB/CG7394/SdhC/N…
GO:CC	GO:0044391	ribosomal subunit	85/3501	177/12534	8.88153e-09	1.0108e-07	4.67449e-08	CG11700/RpL37b/mRpS25/RpL38/RpL15/mRpL23/mRpL45/mRpS23/mRpL38/RpL36/RpS25/mRpL17/mRpS11/mRpL19/mRpL34/mRpS22/mRpL1/RpS5b/CG6094/mRpL52/mRpL4/mRpL30/mRpL27/mRpS14/mRpS7/mRpS2/mRpL33/mRpL16/mRpS18A/cav/mRpS5/mRpS26/RpS20/RpS29/RpL37A/RpS30/mRpS35/mRpL35/mRpL49/mRpL28/mRpL39/bonsai/mRpL15/RpL39/mRpS9/RpS27A/RpS15/mRpS17/RpLP1/mRpS33/mRpS6/RpL4/RpS11/RpL27A/mRpL51/mRpL10/mRpL50/mRpL24/mRpL40/mRpS16/R…
GO:CC	GO:0043005	neuron projection	192/3501	468/12534	3.6196e-10	4.94334e-09	2.28606e-09	DIP-lambda/CASK/nSyb/mnb/RSG7/shrb/nAChRalpha2/Nmdar1/Syt4/hep/futsch/Synj/yps/Syn/Arl8/Nrx-1/Fmr1/Scamp/tral/nAChRalpha4/beta-Spec/sgg/Fak/Nrt/alphaSnap/Nak/Sac1/Past1/stau/dpr10/inaE/dpr18/X11Lbeta/Rab3-GEF/Lar/Khc/Pdf/dpr11/Abl/Srpk79D/plum/dpr12/Wnt5/Dhc64C/comt/par-1/Dab/Rop/Syt1/dpr1/CG7166/Nedd4/Unc-76/CG34353/Lrp4/drpr/SK/Abp1/dpr19/EndoA/gek/Rab11/kek6/arm/Lis-1/Efa6/pHCl-1/robo3/metro/D…
Cluster C
source	ID	Description	GeneRatio	BgRatio	pvalue	p.adjust < 0.05	qvalue	geneID
GO:MF	GO:0003735	structural constituent of ribosome	24/353	289/12393	2.67703e-06	0.00112435	0.000997546	mRpL20/RpL18A/mRpL3/mRpS33/RpL39/CG4866/RpS21/RpL37a/RpL3/mRpL12/RpL23/mRpS25/mRpL33/RpL34b/mRpL21/mRpL50/RpS7/mRpL24/RpS5a/mRpL41/drosha/sta/mRpS28/RpS4
GO:MF	GO:0015078	proton transmembrane transporter activity	12/353	86/12393	5.43357e-06	0.00114105	0.00101236	ATPsynbeta/sun/COX4/ATPsynCF6/ATPsyngamma/Vha13/Vha26/Vha36-1/Nhe2/ATPsynG/ATPsynB/RFeSP
GO:MF	GO:0051082	unfolded protein binding	10/353	81/12393	9.62959e-05	0.00808885	0.00717658	Hsp23/DnaJ-H/CG14483/nudC/Hsp67Ba/Trap1/Hsc70-1/Hsc70-4/Hsp27/Gp93
GO:MF	GO:0008324	cation transmembrane transporter activity	21/353	312/12393	0.000238592	0.0167014	0.0148178	nAChRalpha3/ATPsynbeta/sun/COX4/slo/cac/ATPsynCF6/ATPsyngamma/CG10470/Vha13/CG33181/Hk/GC1/Vha26/Vha36-1/Nhe2/Sh/CG1090/ATPsynG/ATPsynB/RFeSP
GO:BP	GO:0007268	chemical synaptic transmission	34/394	325/12653	5.42222e-10	4.55718e-07	3.54242e-07	dysc/Slob/Cbp53E/Nlg4/gammaSnap1/dnc/Acsl/cpx/cpo/nAChRalpha3/Rdl/Rim/Ten-a/slo/cac/Frq1/Rap1/Neto/Pka-R1/P32/Sod2/dj-1beta/unc-13/Hsc70-4/Frq2/CanB/Csk/Sh/comt/dlg1/Tomosyn/pum/5-HT7/veli
GO:BP	GO:0006091	generation of precursor metabolites and energy	28/394	233/12653	8.49823e-10	4.55718e-07	3.54242e-07	Gapdh1/ATPsynbeta/ND-B14.5B/cype/Gapdh2/sun/UQCR-Q/Chchd2/COX4/Smox/levy/SdhA/Cyt-c-p/COX8/Pfk/Hex-A/Ald1/CG7630/Sirup/ND-MLRQ/dj-1beta/FASN1/GC1/ScsbetaG/Nipsnap/Pgi/RFeSP/ND-B14.5A
GO:BP	GO:0007163	establishment or maintenance of cell polarity	24/394	198/12653	1.18725e-08	4.24442e-06	3.29931e-06	14-3-3zeta/CadN/sdt/scrib/orb/lola/loco/Lis-1/Rap1/Pka-R1/Gbeta13F/Csk/sqd/TSG101/mts/alc/dlg1/ctp/Frl/veli/Ras85D/Ggamma1/heph/tws
GO:BP	GO:0048729	tissue morphogenesis	32/394	366/12653	1.32913e-07	2.59181e-05	2.01468e-05	pan/pyd/cora/CadN/sdt/kkv/sli/hdc/scrib/orb/lola/loco/Rap1/Eip63E/Vha13/Vav/Ubx/Vha26/Gbeta13F/Mkp3/sqd/TSG101/spen/tau/dlg1/ATP6AP2/Frl/dmt/Ras85D/Ggamma1/ths/Grasp65
GO:CC	GO:0098798	mitochondrial protein-containing complex	41/390	268/12534	1.5028e-17	5.13957e-15	3.68581e-15	ATPsynbeta/ND-B14.5B/cype/CG17691/sun/ND-MWFE/ND-B14.7/UQCR-Q/COX4/levy/SdhA/CG40472/mRpL20/COX8/ATPsynCF6/mRpL3/CG11752/ND-30/mRpS33/ATPsyngamma/CG7630/ND-MLRQ/CG44242/mRpL12/CG31229/mRpS25/mRpL33/mRpL21/mRpL50/EMRE/mge/Pdhb/mRpL24/mRpL41/ATPsynG/CG11779/ATPsynB/QIL1/mRpS28/RFeSP/ND-B14.5A
GO:CC	GO:0031967	organelle envelope	48/390	476/12534	4.26641e-13	2.91822e-11	2.09279e-11	14-3-3zeta/ATPsynbeta/ND-B14.5B/cype/Mpcp2/sun/ND-MWFE/ND-B14.7/UQCR-Q/COX4/levy/SdhA/Cyt-c-p/CG14483/CG40472/COX8/ATPsynCF6/CG11752/ND-30/Lis-1/ATPsyngamma/CG7630/ND-MLRQ/Trap1/GC1/Hsc70-4/CG5532/slmo/CG31229/Coq4/nmd/pum/EMRE/Coq7/koi/mge/SREBP/zda/Sdhaf3/Dhod/Nipsnap/Dbp80/ATPsynG/CG11779/ATPsynB/QIL1/RFeSP/ND-B14.5A
GO:CC	GO:0044391	ribosomal subunit	23/390	177/12534	6.19307e-09	2.35337e-07	1.6877e-07	mRpL20/RpL18A/mRpL3/mRpS33/RpL39/CG4866/RpS21/RpL37a/RpL3/mRpL12/RpL23/mRpS25/mRpL33/RpL34b/mRpL21/mRpL50/RpS7/mRpL24/RpS5a/mRpL41/sta/mRpS28/RpS4
GO:CC	GO:0043005	neuron projection	34/390	468/12534	3.79018e-06	8.41083e-05	6.03177e-05	dysc/Cbp53E/pyd/CadN/Acsl/cpx/nAChRalpha3/Rdl/sli/hdc/g/slo/orb/dpr13/Atg8a/plum/Lis-1/dpr2/Appl/unc-13/Pdfr/Tmc/comt/DIP-delta/tau/dlg1/orb2/nrv2/pum/5-HT7/fipi/yps/AGO2/robo3

## Sheet: Cluster A
source	term_name	term_id	GeneRatio	BgRatio	pvalue	p.adjust < 0.05	qvalue	geneID
GO:MF	enzyme binding	GO:0019899	199/3083	430/12393	9.11377e-23	5.86015e-20	4.17315e-20	l(3)80Fj/alc/Msp300/Trap1/pico/Cul1/CG7029/Evi5/futsch/Ccm3/pnut/Ctr9/CG2993/CG42673/SNF4Agamma/Npl4/SCCRO/ari-1/prd1/Der-2/ben/dsd/tub/mbt/IKKepsilon/CG43367/capt/hook/rdx/garz/Pak3/Raf/Su(var)205/Nedd8/Der-1/Rlip/sordd1/Lk6/arm/SCCRO4/CG11700/ZAP3/GM130/atms/Mob2/Sara/Mitofilin/Gbs-76A/BicD/GCC88/emb/Wdfy2/tral/cdm/Axn/CG4645/Tnpo/sau/ref(2)P/Nop17l/Ufd1/Atg17/wcy/Frl/spg/Rpn10/SCCRO3/RhoGAP68F…
GO:MF	GTPase regulator activity	GO:0030695	95/3083	168/12393	1.34004e-18	2.87214e-16	2.04532e-16	CG1695/RhoGEF3/RapGAP1/loco/tbc/Evi5/siz/RhoGAPp190/Vav/eIF5/CG18659/CG9098/Dhit/RhoGAP19D/RhoGAP93B/RSG7/ArfGAP1/Bet3/CG34393/sif/garz/Rlip/Asap/GAPcenA/Cdep/ArfGAP3/drongo/Graf/Efa6/Trs31/Nf1/RtGEF/Lamtor1/vimar/vap/CG5916/spg/CG34408/C3G/RhoGAP68F/CG42795/CG5521/RN-tre/RhoGAP1A/Lamtor3/TBC1D16/CG7369/Mon1/eEF1delta/CG8155/CG3703/Sec23/Ziz/RanBP3/PsGEF/Tbc1d8-9/Rep/CenG1A/HPS4/eIF2Balpha/RhoGAP…
GO:MF	nucleoside-triphosphatase regulator activity	GO:0060589	95/3083	168/12393	1.34004e-18	2.87214e-16	2.04532e-16	CG1695/RhoGEF3/RapGAP1/loco/tbc/Evi5/siz/RhoGAPp190/Vav/eIF5/CG18659/CG9098/Dhit/RhoGAP19D/RhoGAP93B/RSG7/ArfGAP1/Bet3/CG34393/sif/garz/Rlip/Asap/GAPcenA/Cdep/ArfGAP3/drongo/Graf/Efa6/Trs31/Nf1/RtGEF/Lamtor1/vimar/vap/CG5916/spg/CG34408/C3G/RhoGAP68F/CG42795/CG5521/RN-tre/RhoGAP1A/Lamtor3/TBC1D16/CG7369/Mon1/eEF1delta/CG8155/CG3703/Sec23/Ziz/RanBP3/PsGEF/Tbc1d8-9/Rep/CenG1A/HPS4/eIF2Balpha/RhoGAP…
GO:MF	hydrolase activity, acting on acid anhydrides	GO:0016817	166/3083	376/12393	1.04734e-16	1.6836e-14	1.19893e-14	Septin2/Ras85D/comt/Trap1/CG2918/TER94/atl/Marf/RhoGAPp190/Atpalpha/Arl8/pnut/shi/Khc/CG31729/Khc-73/Rab11/CG8891/Rpt6/SPoCk/CG1598/eRF3/Ns3/Afg3l2/CCT3/ATP8A/Septin4/Aps/Nsf2/Ras64B/Rheb/ABCB7/RabX4/Eato/CCT2/Abcd3/SERCA/Rpt5/SrpRalpha/CG1703/CG17646/CG13390/Hsp60A/pix/Kif3C/CG42813/CCT6/Iswi/Hsc70Cb/CCT8/PMCA/Klp64D/DCP2/nmd/Ran/Rab3/RabX1/Atet/Lon/Hsc70-5/Rho1/Arl5/CG1824/CG33298/Rpt2/Rab4/Sar…
GO:MF	pyrophosphatase activity	GO:0016462	164/3083	371/12393	1.39626e-16	1.79559e-14	1.27868e-14	Septin2/Ras85D/comt/Trap1/CG2918/TER94/atl/Marf/RhoGAPp190/Atpalpha/Arl8/pnut/shi/Khc/CG31729/Khc-73/Rab11/CG8891/Rpt6/SPoCk/CG1598/eRF3/Ns3/Afg3l2/CCT3/ATP8A/Septin4/Aps/Nsf2/Ras64B/Rheb/ABCB7/RabX4/Eato/CCT2/Abcd3/SERCA/Rpt5/SrpRalpha/CG1703/CG17646/CG13390/Hsp60A/pix/Kif3C/CG42813/CCT6/Iswi/Hsc70Cb/CCT8/PMCA/Klp64D/DCP2/nmd/Ran/Rab3/RabX1/Atet/Lon/Hsc70-5/Rho1/Arl5/CG1824/CG33298/Rpt2/Rab4/Sar…
GO:MF	hydrolase activity, acting on acid anhydrides, in phosphorus-containing anhydrides	GO:0016818	165/3083	375/12393	1.91239e-16	2.04944e-14	1.45945e-14	Septin2/Ras85D/comt/Trap1/CG2918/TER94/atl/Marf/RhoGAPp190/Atpalpha/Arl8/pnut/shi/Khc/CG31729/Khc-73/Rab11/CG8891/Rpt6/SPoCk/CG1598/eRF3/Ns3/Afg3l2/CCT3/ATP8A/Septin4/Aps/Nsf2/Ras64B/Rheb/ABCB7/RabX4/Eato/CCT2/Abcd3/SERCA/Rpt5/SrpRalpha/CG1703/CG17646/CG13390/Hsp60A/pix/Kif3C/CG42813/CCT6/Iswi/Hsc70Cb/CCT8/PMCA/Klp64D/DCP2/nmd/Ran/Rab3/RabX1/Atet/Lon/Hsc70-5/Rho1/Arl5/CG1824/CG33298/Rpt2/Rab4/Sar…
GO:MF	nucleoside-triphosphatase activity	GO:0017111	152/3083	343/12393	1.43867e-15	1.32152e-13	9.41085e-14	Septin2/Ras85D/comt/Trap1/CG2918/TER94/atl/Marf/RhoGAPp190/Atpalpha/Arl8/pnut/shi/Khc/CG31729/Khc-73/Rab11/Rpt6/SPoCk/CG1598/eRF3/Ns3/Afg3l2/CCT3/ATP8A/Septin4/Nsf2/Ras64B/Rheb/ABCB7/RabX4/Eato/CCT2/Abcd3/SERCA/Rpt5/SrpRalpha/CG1703/CG17646/CG13390/Hsp60A/pix/Kif3C/CCT6/Iswi/Hsc70Cb/CCT8/PMCA/Klp64D/nmd/Ran/Rab3/RabX1/Atet/Lon/Hsc70-5/Rho1/Arl5/CG1824/CG33298/Rpt2/Rab4/Sar1/Hmt-1/CenG1A/CG33158/R…
GO:MF	protein-macromolecule adaptor activity	GO:0030674	72/3083	128/12393	2.89853e-14	2.32969e-12	1.65903e-12	Cul1/gammaSnap1/Dora/gcl/Syx7/Use1/alphaSnap/Syx13/Kdm5/CG44085/milt/Su(var)205/cm/Hip1/cal1/AP-1gamma/Syx18/AP-1-2beta/BicD/pod1/drk/Prosap/Vti1b/slmb/AP-2sigma/gammaSnap2/Pat1/nSyb/raptor/CG17270/Bet1/Sec22/Syx6/Syx5/DCAF12/hep/Cul5/Ykt6/koi/Sarm/Vamp7/csw/cos/syd/AP-1sigma/Afti/Syx17/Aplip1/Gga/Ank/Sbf/Cul2/dsh/CG3104/ckn/Syx8/AP-2alpha/wap/cnk/sn/Pex3/Gos28/Dab/brm/Wdr59/CG8677/wek/HP1c/Gbeta…
GO:MF	enzyme regulator activity	GO:0030234	175/3083	430/12393	1.58202e-13	1.13026e-11	8.04886e-12	l(3)80Fj/CG1695/RhoGEF3/RapGAP1/Hasp/mnb/Frq1/loco/tbc/tws/Frq2/PPP4R2r/Sirup/Evi5/siz/RhoGAPp190/Vav/eIF5/CG18659/CG9098/Cp1/Dhit/RhoGAP19D/CG11523/Kdm5/Eip63F-1/RhoGAP93B/RSG7/ArfGAP1/Bet3/sigmar/CG34393/sif/Lkb1/garz/fzr/Rlip/Asap/Rpn7/jeb/GAPcenA/CG14408/Mo25/Bruce/Cdep/ArfGAP3/drongo/Graf/Mob2/levy/Efa6/Trs31/sra/Nf1/RtGEF/Lamtor1/vimar/vap/Rpn3/Atg17/CG5916/spg/Drep1/CG34408/C3G/RhoGAP68F/2…
GO:MF	transcription coregulator activity	GO:0003712	87/3083	177/12393	2.0171e-12	1.297e-10	9.2362e-11	mnb/exd/DMAP1/Lpin/wde/lgs/Wbp2/MED24/CG5446/Kdm2/Hcf/RYBP/arm/dmpd/Sap30/mam/CG13293/alien/Camta/gro/MED7/caz/CG6013/MED6/crc/Ssb-c31a/CG14073/Smr/CG10555/Sirt1/CG17202/CG10631/Taf11/nej/ebi/Bgb/nvy/MED19/Mad/Spt20/CycC/lilli/e(y)3/Sin3A/Ddx1/sbb/CG42724/Bin1/Lpt/skd/MED10/CG1620/srl/Su(var)2-10/CG11710/CG17568/trr/MED15/Utx/kto/MED20/CG16779/Spt3/pygo/Gug/Bap60/CoRest/MED22/Art1/MED14/MED4/akir…
GO:MF	enzyme activator activity	GO:0008047	76/3083	154/12393	3.90796e-11	2.28438e-09	1.62676e-09	CG1695/RapGAP1/Frq1/loco/tbc/Frq2/Sirup/Evi5/RhoGAPp190/Cp1/Dhit/RhoGAP19D/RhoGAP93B/RSG7/ArfGAP1/Lkb1/fzr/Rlip/Asap/jeb/GAPcenA/Mo25/ArfGAP3/drongo/Graf/Mob2/Nf1/vap/CG5916/CG34408/RhoGAP68F/26-29-p/CG42795/CG5521/RN-tre/RhoGAP1A/TBC1D16/wrd/bur/CG8155/CG3703/Sec23/RanBP3/Tbc1d8-9/CenG1A/CycY/CycK/Asx/RhoGAP92B/CG17883/flfl/Ing5/CG42450/Rab3GAP1/ASPP/mats/Cdc37/TBC1D5/wkd/Ptpa/Mat1/Pdk1/Rpn13/PC…
GO:MF	guanyl nucleotide binding	GO:0019001	79/3083	165/12393	1.08281e-10	5.71539e-09	4.07006e-09	Septin2/Ras85D/atl/gammaTub23C/Marf/RhoGAPp190/AdSS/Arl8/pnut/shi/Rab11/alphaTub84D/eRF3/Ns3/Septin4/chb/Ras64B/Rheb/RabX4/SrpRalpha/CG13390/Past1/Ran/Rab3/RabX1/CG7488/Rho1/CG5116/Arl5/Rab4/Sar1/CenG1A/CG33158/Rab18/Rab35/CG30054/mEFG1/Rab30/RecQ5/mIF2/Srp54k/Arfrp1/CG10914/Rab5/Ttd14/mEFTu2/RagA-B/RhoBTB/Rab39/eIF2gamma/Rab6/Rab1/Rab8/Rab7/Rab10/betaTub56D/Drp1/Rac1/mRRF2/CG42260/Rab21/Ns4/eIF5…
GO:MF	GTPase binding	GO:0051020	58/3083	108/12393	1.15552e-10	5.71539e-09	4.07006e-09	Evi5/prd1/mbt/IKKepsilon/hook/garz/Pak3/Rlip/GM130/BicD/GCC88/emb/cdm/CG4645/Tnpo/sau/Frl/spg/RhoGAP68F/Vps35/CG4557/msk/Ranbp16/Pkn/Golgin84/Ranbp21/CG8578/DAAM/Gapvd1/CG6607/ema/Sec71/Rab3GAP1/Sec5/pns/Vps52/Arts/TBC1D5/Gga/Crag/Sbf/Tnpo-SR/CG32485/Rph/CG1116/CG31064/RanBPM/GAPsec/Vps8/Zw10/Sec15/ca/ebo/Apl/Rbpn-5/Fs(2)Ket/Golgin104/Rgl
GO:MF	guanyl ribonucleotide binding	GO:0032561	77/3083	160/12393	1.36699e-10	6.27841e-09	4.471e-09	Septin2/Ras85D/atl/gammaTub23C/Marf/RhoGAPp190/AdSS/Arl8/pnut/shi/Rab11/alphaTub84D/eRF3/Ns3/Septin4/chb/Ras64B/Rheb/RabX4/SrpRalpha/CG13390/Past1/Ran/Rab3/RabX1/CG7488/Rho1/CG5116/Arl5/Rab4/Sar1/CenG1A/CG33158/Rab18/Rab35/mEFG1/Rab30/RecQ5/mIF2/Srp54k/Arfrp1/CG10914/Rab5/Ttd14/mEFTu2/RagA-B/RhoBTB/Rab39/eIF2gamma/Rab6/Rab1/Rab8/Rab7/Rab10/betaTub56D/Drp1/Rac1/mRRF2/CG42260/Rab21/Ns4/eIF5B/awd/HB…
GO:MF	GTP binding	GO:0005525	75/3083	156/12393	2.51238e-10	1.07697e-08	7.66938e-09	Septin2/Ras85D/atl/gammaTub23C/Marf/RhoGAPp190/AdSS/Arl8/pnut/shi/Rab11/alphaTub84D/eRF3/Ns3/Septin4/chb/Ras64B/Rheb/RabX4/SrpRalpha/CG13390/Past1/Ran/Rab3/RabX1/CG7488/Rho1/CG5116/Arl5/Rab4/Sar1/CenG1A/CG33158/Rab18/Rab35/mEFG1/Rab30/RecQ5/mIF2/Srp54k/Arfrp1/CG10914/Rab5/Ttd14/mEFTu2/RagA-B/RhoBTB/Rab39/eIF2gamma/Rab6/Rab1/Rab8/Rab7/Rab10/betaTub56D/Drp1/Rac1/mRRF2/Rab21/Ns4/eIF5B/awd/HBS1/Arl1/…
GO:MF	molecular function activator activity	GO:0140677	145/3083	368/12393	3.17273e-10	1.20004e-08	8.54573e-09	CG1695/RhoGEF3/RapGAP1/Frq1/loco/Actbeta/tbc/Nplp1/Frq2/Sirup/Evi5/ths/siz/RhoGAPp190/bnl/Vav/CG18659/alphaSnap/CG9098/Cp1/Dhit/RhoGAP19D/RhoGAP93B/nrv3/RSG7/ArfGAP1/Bet3/CG34393/Vta1/sif/Lkb1/garz/fzr/Rlip/Asap/jeb/GAPcenA/Mo25/Cdep/ArfGAP3/drongo/Graf/Mob2/Efa6/Trs31/Nf1/RtGEF/Lamtor1/Sema2a/vimar/vap/CG7394/CG5916/spg/CG34408/C3G/RhoGAP68F/26-29-p/CG42795/CG5521/RN-tre/RhoGAP1A/Lamtor3/TBC1D16…
GO:MF	kinase activity	GO:0016301	133/3083	330/12393	3.02325e-10	1.20004e-08	8.54573e-09	CG8565/CG31145/Pfk/Hex-A/alc/mnb/CASK/Cmpk/Atg1/Dyrk3/Eip63E/Pkc53E/CG4629/CG2201/CG32944/l(1)G0196/PKD/sff/AMPKalpha/Dgkepsilon/Nuak/tub/dco/mbt/IKKepsilon/Srpk79D/dop/CG17528/S6KL/aux/Cdk12/Sik3/Lkb1/Pak3/Raf/Madm/Lk6/Dyrk2/bon/fwd/p38b/slpr/Nak/Wee1/Abl/Cdc2rk/sgg/PhKgamma/Pink1/S6k/Fak/Adk3/Doa/Uck/Ak1/Drak/Eph/Tao/par-1/gek/Pgk/Adk2/MAPk-Ak2/Cad96Ca/Wnk/Papss/rl/fbl/Akt/SRPK/Ret/hep/wit/Ire1…
GO:MF	small GTPase binding	GO:0031267	56/3083	105/12393	3.42831e-10	1.22467e-08	8.72113e-09	Evi5/prd1/mbt/IKKepsilon/hook/garz/Pak3/Rlip/GM130/BicD/GCC88/emb/cdm/CG4645/Tnpo/sau/Frl/spg/RhoGAP68F/Vps35/CG4557/msk/Ranbp16/Pkn/Golgin84/Ranbp21/CG8578/DAAM/Gapvd1/CG6607/ema/Sec71/Rab3GAP1/Sec5/pns/Vps52/Arts/TBC1D5/Gga/Crag/Sbf/Tnpo-SR/CG32485/Rph/CG1116/CG31064/RanBPM/Zw10/Sec15/ca/ebo/Apl/Rbpn-5/Fs(2)Ket/Golgin104/Rgl
GO:MF	ubiquitin-like protein transferase activity	GO:0019787	89/3083	198/12393	4.71518e-10	1.51593e-08	1.07953e-08	Ubc2/CG2991/HUWE1/gzl/CG1317/UbcE2H/ari-1/ben/Kaz/Iru/Mkrn1/Herc4/Atg3/CG10254/Nedd4/Ufl1/sordd1/bon/Bruce/CG11360/CG32369/msl-2/hyd/Bre1/Ubr3/Cnot4/CG13344/CG4238/Ubc6/CG4080/sordd2/CG7326/poe/Ufc1/Ube4A/Ubc4/Pli/sip3/Rnf146/Atg10/CG9855/Ubr1/HERC2/Su(dx)/CG17019/Traf6/Trc8/CG14435/Cbl/CG7220/Diap2/CG8188/CG13994/roq/CG7656/HDAC4/STUB1/lwr/Su(var)2-10/UbcE2M/CG15814/mib2/gol/Ufd4/Roc1a/CG11414/T…
GO:MF	kinase binding	GO:0019900	55/3083	103/12393	4.63412e-10	1.51593e-08	1.07953e-08	l(3)80Fj/alc/Msp300/Trap1/futsch/Ccm3/SNF4Agamma/tub/CG43367/Raf/Lk6/arm/Mob2/Mitofilin/Wdfy2/Axn/ref(2)P/Atg17/MAPk-Ak2/rl/Tm1/Ptp61F/Rho1/hep/Nrx-1/CG40191/Dsor1/CycY/mask/dome/Cbl/csw/cos/PICK1/syd/mats/Cdc37/Aplip1/Sbf/Mekk1/cnk/POSH/Patj/Rac1/Rab21/Pp2C1/Spred/Pgam5/Atg8a/CG9044/Pi3K21B/Mbs/Cdc42/SH3PX1/Strip
GO:MF	guanyl-nucleotide exchange factor activity	GO:0005085	47/3083	83/12393	6.31669e-10	1.93411e-08	1.37732e-08	RhoGEF3/siz/Vav/CG18659/CG9098/Bet3/CG34393/sif/garz/Cdep/Efa6/Trs31/RtGEF/Lamtor1/vimar/spg/C3G/RhoGAP1A/Lamtor3/CG7369/Mon1/eEF1delta/Ziz/PsGEF/HPS4/eIF2Balpha/pcs/Gapvd1/Bet5/CG3862/Sec71/ric8a/pns/HPS1/eIF2Bbeta/Crag/step/Sbf/Rcc1/CG4853/CG42674/Rab3-GEF/Lamtor4/strat/ca/eIF2Bgamma/Rgl
GO:MF	phospholipid binding	GO:0005543	70/3083	146/12393	1.1493e-09	3.35908e-08	2.39207e-08	EndoB/AnxB10/nwk/baz/Syt4/qvr/Pcyt2/CG18659/lap/CG1902/drpr/lqf/rdgB/Snx3/Asap/Snx21/Cip4/Snx27/Hip1/beta-Spec/EndoA/Graf/Efa6/Stam/hob/sau/Pcyt1/CG3529/AnxB11/CG5973/Snx17/kmr/Atg18b/Amph/Syt14/CG6454/lqfR/PsGEF/Snx6/CG8176/CG30392/RhoGAP92B/vib/CG11975/Synd/Moe/PICK1/Ttd14/cert/Gga/step/Syt1/dsh/Arfip/Itpr/Rph/Hrs/Klp98A/Gprk1/l(2)gd1/Svil/CG7156/FER/Snx1/Gel/SH3PX1/Atg18a/rpr/Rbpn-5/Rubicon
GO:MF	GTPase activator activity	GO:0005096	46/3083	83/12393	2.48932e-09	6.95926e-08	4.95584e-08	CG1695/RapGAP1/loco/tbc/Evi5/RhoGAPp190/Dhit/RhoGAP19D/RhoGAP93B/RSG7/ArfGAP1/Rlip/Asap/GAPcenA/ArfGAP3/drongo/Graf/Nf1/vap/CG5916/CG34408/RhoGAP68F/CG42795/CG5521/RN-tre/RhoGAP1A/TBC1D16/CG8155/CG3703/Sec23/RanBP3/Tbc1d8-9/CenG1A/RhoGAP92B/CG17883/CG42450/Rab3GAP1/TBC1D5/wkd/CG4041/GAPsec/RhoGAP5A/RhoGAP71E/Nup358/cv-c/Rbpn-5
GO:MF	protein kinase activity	GO:0004672	98/3083	234/12393	6.57441e-09	1.76139e-07	1.25433e-07	CG8565/CG31145/alc/mnb/CASK/Atg1/Dyrk3/Eip63E/Pkc53E/CG4629/CG32944/PKD/sff/AMPKalpha/Nuak/tub/dco/mbt/IKKepsilon/Srpk79D/dop/CG17528/S6KL/aux/Cdk12/Sik3/Lkb1/Pak3/Raf/Madm/Lk6/Dyrk2/bon/p38b/slpr/Nak/Wee1/Abl/Cdc2rk/sgg/PhKgamma/Pink1/S6k/Fak/Doa/Drak/Eph/Tao/par-1/gek/MAPk-Ak2/Cad96Ca/Wnk/rl/Akt/SRPK/Ret/hep/wit/Ire1/Pkn/Dsor1/Cdc7/CaMKI/Src64B/cdi/trc/nmo/Ack/LIMK1/Tlk/aPKC/Pdk1/Sik2/tkv/Alk/M…
GO:MF	ubiquitin-protein transferase activity	GO:0004842	79/3083	178/12393	8.96962e-09	2.30699e-07	1.64286e-07	Ubc2/CG2991/HUWE1/gzl/CG1317/UbcE2H/ari-1/ben/Kaz/Iru/Mkrn1/Herc4/CG10254/Nedd4/sordd1/bon/Bruce/CG11360/CG32369/msl-2/hyd/Bre1/Ubr3/Cnot4/CG13344/CG4238/Ubc6/CG4080/sordd2/CG7326/poe/Ube4A/Ubc4/Pli/sip3/Rnf146/CG9855/Ubr1/HERC2/Su(dx)/CG17019/Traf6/Trc8/CG14435/Cbl/CG7220/Diap2/CG8188/CG13994/roq/CG7656/STUB1/CG15814/mib2/gol/Ufd4/Roc1a/CG11414/Trim9/POSH/Ubc10/CG3894/CG2218/CG2924/CG5823/hiw/Kc…
GO:MF	protein kinase binding	GO:0019901	45/3083	84/12393	1.53185e-08	3.78838e-07	2.69779e-07	l(3)80Fj/alc/Msp300/Trap1/Ccm3/SNF4Agamma/tub/CG43367/Lk6/Mob2/Mitofilin/Wdfy2/Axn/ref(2)P/Atg17/MAPk-Ak2/rl/Tm1/Ptp61F/hep/Nrx-1/CG40191/CycY/mask/dome/Cbl/csw/cos/PICK1/syd/mats/Cdc37/Aplip1/Mekk1/cnk/POSH/Patj/Rac1/Pp2C1/Spred/Atg8a/CG9044/Mbs/Cdc42/Strip
GO:MF	ATP hydrolysis activity	GO:0016887	84/3083	196/12393	2.23429e-08	5.32092e-07	3.78915e-07	comt/Trap1/CG2918/TER94/Atpalpha/Khc/CG31729/Khc-73/Rpt6/SPoCk/CG1598/Afg3l2/CCT3/ATP8A/Nsf2/ABCB7/Eato/CCT2/Abcd3/SERCA/Rpt5/CG1703/CG17646/Hsp60A/pix/Kif3C/CCT6/Iswi/Hsc70Cb/CCT8/PMCA/Klp64D/nmd/Atet/Lon/Hsc70-5/CG1824/CG33298/Rpt2/Hmt-1/Vps4/Gp93/Top2/CCT7/YME1L/Hsc70-1/CCT4/Rpt4/ClpX/Hsc70-4/cos/Klp68D/Klp10A/SMC1/Rpt3/CG10226/Abca3/CG5276/kis/Chd1/CG8520/CG17904/spel1/SMC3/CG4562/Mlh1/Klp98A…
GO:MF	lipid binding	GO:0008289	92/3083	221/12393	2.69202e-08	6.18203e-07	4.40236e-07	EndoB/AnxB10/nwk/baz/Syt4/qvr/Pcyt2/CG18659/lap/CG1902/drpr/CG43783/lqf/rdgB/Snx3/Asap/Snx21/Cip4/Snx27/Hip1/CG8814/beta-Spec/EndoA/Graf/Efa6/CG3860/Stam/CG6565/hob/sau/Pcyt1/Npc2a/Npc1a/CG3529/AnxB11/CG5973/Snx17/Clic/kmr/SCAP/MSBP/Osbp/Atg18b/Amph/Syt14/CG6454/lqfR/PsGEF/Snx6/CG8176/CG30392/gce/CG10362/RhoGAP92B/vib/ACOX1/CG11975/Synd/DopEcR/Moe/PICK1/Ttd14/cert/Gga/step/Syt1/dsh/Arfip/Itpr/Coq…
GO:MF	GTPase activity	GO:0003924	67/3083	147/12393	3.33677e-08	7.39842e-07	5.26858e-07	Septin2/Ras85D/atl/Marf/RhoGAPp190/Arl8/pnut/shi/Rab11/eRF3/Ns3/Septin4/Ras64B/Rheb/RabX4/SrpRalpha/CG13390/Ran/Rab3/RabX1/Rho1/Arl5/Rab4/Sar1/CenG1A/CG33158/Rab18/Rab35/CG30054/mEFG1/Rab30/RecQ5/mIF2/Srp54k/Arfrp1/Rab5/mEFTu2/RagA-B/RhoBTB/Rab39/eIF2gamma/Rab6/Rab1/Rab8/Rab7/Rab10/betaTub56D/Drp1/Rac1/mRRF2/Rab21/Ns4/eIF5B/Galphaq/HBS1/Arl1/Rap2l/Septin1/RagC-D/Cdc42/betaTub97EF/CG4789/Miro/Arl2…
GO:MF	cytoskeletal protein binding	GO:0008092	129/3083	339/12393	3.60334e-08	7.72316e-07	5.49984e-07	Arpc3A/Kank/Msp300/CG2258/capu/CG2082/gammaTub23C/SCAR/tmod/futsch/zip/Arl8/pnut/shi/Khc/ReepA/Patronin/Khc-73/prd1/Tbce/alphaTub84D/milt/capt/chb/inc/hook/Nedd4/ens/TTLL4A/wac/Cdep/Hip1/beta-Spec/nudE/Kap3/cib/Efa6/BicD/Kif3C/pod1/Actn/hts/Arp2/TBCC/Klp64D/Klc/DCP2/Frl/Arpc5/CLIP-190/Smn/msps/Vps16A/Rab3/CG5022/Unc-115a/Tm1/Arpc2/Myo95E/Arp3/alpha-Spec/Blos2/Apc/CG30389/yrt/Pcl/Mlc-c/kel/Cortact…
GO:MF	transferase activity, transferring phosphorus-containing groups	GO:0016772	172/3083	484/12393	6.28003e-08	1.3026e-06	9.27611e-07	CG8565/CG31145/Pfk/Hex-A/alc/mnb/CASK/Cmpk/PyK/Atg1/Dyrk3/Eip63E/Pkc53E/Pcyt2/CG4629/CG2201/CG32944/l(1)G0196/PKD/sff/AMPKalpha/Dgkepsilon/Nuak/tub/dco/mbt/IKKepsilon/Srpk79D/dop/CG17528/S6KL/aux/Cdk12/Pect/UGP/Sik3/Lkb1/Pak3/Raf/Madm/Lk6/Dyrk2/bon/fwd/p38b/slpr/Nak/Wee1/Abl/Cdc2rk/sgg/PhKgamma/Pink1/bbc/S6k/Fak/Adk3/Nmnat/Doa/Uck/Ak1/Drak/Eph/Pcyt1/CLS/Tao/par-1/CG31098/gek/Pgk/Adk2/MAPk-Ak2/Pol…
GO:MF	protein serine/threonine kinase activity	GO:0004674	79/3083	187/12393	1.2171e-07	2.4456e-06	1.74157e-06	CG8565/CG31145/alc/mnb/CASK/Atg1/Dyrk3/Eip63E/Pkc53E/CG4629/CG32944/PKD/sff/AMPKalpha/Nuak/tub/dco/mbt/IKKepsilon/dop/CG17528/S6KL/aux/Cdk12/Sik3/Lkb1/Pak3/Raf/Lk6/Dyrk2/p38b/slpr/Nak/Cdc2rk/sgg/PhKgamma/Pink1/S6k/Doa/Drak/Tao/par-1/gek/MAPk-Ak2/Wnk/rl/Akt/SRPK/wit/Ire1/Pkn/Cdc7/CaMKI/cdi/trc/nmo/LIMK1/Tlk/aPKC/Pdk1/Sik2/tkv/Mekk1/CkIalpha/bsk/Prp4k/Cdk7/Tor/Gprk1/Aduk/Tcs5/Pask/CG7156/PEK/CkIIal…
GO:MF	unfolded protein binding	GO:0051082	42/3083	81/12393	1.55513e-07	3.03015e-06	2.15784e-06	Hsp67Ba/Calr/Cnx99A/Trap1/CG2918/CG14483/DnaJ-H/CCT3/nudC/Roe1/CCT2/Nmnat/Droj2/CCT6/CCT8/Pfdn6/CG10286/CG14671/CG11267/mrj/Hsc70-5/Ire1/Tim9a/CG14207/Gp93/Pfdn5/CCT7/Pfdn4/Hsc70-1/CCT4/ClpX/Hsc70-4/Cdc37/Pfdn1/CG10055/Uggt/RIC-3/Hsp70Ba/Pfdn2/CG1847/Edem2/shv
GO:MF	ubiquitin-like protein ligase activity	GO:0061659	66/3083	156/12393	1.22055e-06	2.30827e-05	1.64377e-05	CG2991/HUWE1/gzl/CG1317/ari-1/Kaz/Iru/Mkrn1/Herc4/Nedd4/Ufl1/sordd1/bon/CG11360/CG32369/msl-2/hyd/Bre1/Ubr3/Cnot4/CG13344/CG4238/CG4080/sordd2/CG7326/poe/Ube4A/Pli/sip3/Rnf146/CG9855/Ubr1/HERC2/Su(dx)/CG17019/Traf6/CG14435/Cbl/Diap2/CG13994/roq/STUB1/Su(var)2-10/CG15814/mib2/gol/Ufd4/Roc1a/CG11414/Trim9/POSH/CG3894/CG2218/hiw/Kcmf1/CG6179/elgi/CG12099/CG7694/Pits/cerv/Sce/mus302/Sou/Prp19/dx
GO:MF	SNARE binding	GO:0000149	28/3083	49/12393	1.43955e-06	2.64465e-05	1.88332e-05	gammaSnap1/Syt4/Sec24CD/lap/Syx7/alphaSnap/Syx13/Vps45/Rop/Syx18/car/gammaSnap2/nSyb/Sec24AB/Bet1/Vps16A/Syx6/Syx5/Vamp7/Vps52/Syx17/cpx/Syt1/Syx8/Vps50/Uvrag/Sec6/Snap25
GO:MF	translation regulator activity, nucleic acid binding	GO:0090079	44/3083	92/12393	1.48269e-06	2.64825e-05	1.88587e-05	orb/mxt/eIF5/eIF3j/eRF3/CG8963/Sxl/CG6094/mEFTs/eIF4E1/eIF4H1/eIF3a/orb2/Gyf/PAN2/eEF1delta/mRpL49/eIF3d1/CG5726/eIF2beta/Fmr1/mEFG1/eIF4EHP/eIF2Balpha/mIF2/eIF2alpha/eIF3g1/eIF4G1/NAT1/mRF1/pum/eRF1/eIF2Bbeta/mEFTu2/eIF2gamma/CG31957/eIF3h/eIF1A/eEF1gamma/smg/eIF5B/eIF2Bgamma/CG4849/eIF3b
GO:MF	ubiquitin protein ligase activity	GO:0061630	63/3083	148/12393	1.64647e-06	2.8613e-05	2.0376e-05	CG2991/HUWE1/gzl/CG1317/ari-1/Kaz/Iru/Mkrn1/Herc4/Nedd4/sordd1/bon/CG11360/CG32369/msl-2/hyd/Bre1/Ubr3/Cnot4/CG13344/CG4238/CG4080/sordd2/CG7326/poe/Ube4A/Pli/sip3/Rnf146/CG9855/Ubr1/HERC2/Su(dx)/CG17019/Traf6/CG14435/Cbl/Diap2/CG13994/roq/STUB1/CG15814/mib2/gol/Ufd4/Roc1a/CG11414/Trim9/POSH/CG3894/CG2218/hiw/Kcmf1/CG6179/elgi/CG12099/CG7694/Pits/Sce/mus302/Sou/Prp19/dx
GO:MF	ubiquitin-like protein-specific protease activity	GO:0019783	29/3083	53/12393	3.12845e-06	5.29366e-05	3.76973e-05	Usp7/Usp2/Usp47/CG7332/Usp5/not/Ulp1/scny/puf/CG7222/Den1/Duba/DUBAI/Uch/Usp30/Usp32/Usp15-31/CG4968/Usp14/CSN5/CG2224/Atg4b/eIF3h/Uch-L5/Rpn11/Usp1/Usp10/pira/faf
GO:MF	ubiquitin-like protein binding	GO:0032182	25/3083	43/12393	3.42206e-06	5.64202e-05	4.01781e-05	Atg1/TSG101/CG12024/Npl4/SCCRO/Mvb12/SCCRO4/hyd/Stam/Rad23/rngo/CG3529/SCCRO3/CG5445/CG4968/Rae1/CG2701/Gga/Rpn13/Hrs/CG10435/p47/Vps13D/Plap/Faf2
GO:MF	phosphotransferase activity, alcohol group as acceptor	GO:0016773	127/3083	358/12393	3.71428e-06	5.9707e-05	4.25187e-05	CG8565/CG31145/Pfk/Hex-A/alc/mnb/CASK/PyK/Atg1/Dyrk3/Eip63E/Pkc53E/CG4629/CG2201/CG32944/PKD/sff/AMPKalpha/Dgkepsilon/Nuak/tub/dco/mbt/IKKepsilon/Srpk79D/dop/CG17528/S6KL/aux/Cdk12/Sik3/Lkb1/Pak3/Raf/Madm/Lk6/Dyrk2/bon/fwd/p38b/slpr/Nak/Wee1/Abl/Cdc2rk/sgg/PhKgamma/Pink1/S6k/Fak/Adk3/Doa/Drak/Eph/Tao/par-1/CG31098/gek/Adk2/MAPk-Ak2/Cad96Ca/Wnk/Papss/rl/CG5644/fbl/Akt/SRPK/Ret/hep/wit/Ire1/Pkn/Dso…
GO:MF	molecular carrier activity	GO:0140104	24/3083	41/12393	4.55238e-06	7.13947e-05	5.08418e-05	Scox/EMC8-9/EMC1/ND-ACP/OXA1L/emb/CG3262/Tnpo/Dph3/Ranbp16/EMC6/Ranbp21/Arts/EMC4/CG17904/Kap-alpha3/CG4942/Kap-alpha1/EMC3/ebo/Apl/YL-1/Atox1/Fs(2)Ket
GO:MF	transcription factor binding	GO:0008134	63/3083	152/12393	4.80764e-06	7.36027e-05	5.24142e-05	tou/E2f1/exd/hth/Sobp/cic/14-3-3zeta/Dp/dod/HnRNP-K/arm/Crtc/bin3/Taf4/msl-2/alien/gro/TfIIFbeta/Iswi/NFAT/crc/TfIIB/Met/Sirt1/rl/nej/ebi/Bgb/MED19/Mad/TfIIA-L/gce/HDAC6/dome/da/lilli/Su(fu)/cos/Su(var)3-3/TfIIEbeta/Bin1/M1BP/bs/ebd1/Ack/srl/hyx/Su(var)2-10/CG9650/Trf/kto/brm/Gug/Bap60/btd/sd/CtBP/e(y)2/Jra/Taf1/NC2alpha/kay/abd-A
GO:MF	transcription corepressor activity	GO:0003714	29/3083	54/12393	5.15812e-06	7.7132e-05	5.49274e-05	DMAP1/CG5446/CG13293/alien/gro/CG14073/Smr/Sirt1/CG10631/ebi/nvy/e(y)3/Sin3A/sbb/Bin1/CG1620/CG17568/CG16779/Gug/CoRest/Art1/MTA1-like/Pits/CtBP/jub/MBD-like/NC2alpha/CG9246/uri
GO:MF	protein-containing complex binding	GO:0044877	123/3083	347/12393	5.50168e-06	7.71648e-05	5.49508e-05	l(3)80Fj/Arpc3A/LpR2/Msp300/CG2258/orb/SCAR/zip/Patronin/Rab11/Usp2/aux/fzr/Su(var)205/Der-1/Sec61alpha/Nak/Hip1/Taf4/beta-Spec/Hexim/SrpRalpha/orb2/Clbn/pix/BicD/pod1/Actn/hts/Arp2/Rad23/TfIIFbeta/Nmd3/Iswi/rngo/slmb/escl/clu/DCP2/Frl/Arpc5/Vps28/DCTN6-p27/CG4679/Unc-115a/Tm1/Ubqn/Ubc4/CG7488/Arpc2/CG5116/Myo95E/Ret/Arp3/Ssrp/alpha-Spec/osa/CG33158/LTV1/CG8176/chico/barc/Prp31/CG30054/TfIIA-L/Us…
GO:MF	translation factor activity, RNA binding	GO:0008135	36/3083	73/12393	5.41256e-06	7.71648e-05	5.49508e-05	orb/mxt/eIF5/eIF3j/eRF3/CG6094/mEFTs/eIF4E1/eIF4H1/eIF3a/orb2/eEF1delta/mRpL49/eIF3d1/eIF2beta/mEFG1/eIF4EHP/eIF2Balpha/mIF2/eIF2alpha/eIF3g1/eIF4G1/NAT1/mRF1/eRF1/eIF2Bbeta/mEFTu2/eIF2gamma/CG31957/eIF3h/eIF1A/eEF1gamma/eIF5B/eIF2Bgamma/CG4849/eIF3b
GO:MF	thiol-dependent deubiquitinase	GO:0004843	21/3083	34/12393	5.52035e-06	7.71648e-05	5.49508e-05	Usp7/Usp2/Usp47/CG7332/Usp5/not/scny/puf/CG7222/Duba/DUBAI/Uch/Usp30/Usp32/Usp15-31/CG4968/Usp14/Uch-L5/Usp1/Usp10/faf
GO:MF	chromatin binding	GO:0003682	98/3083	265/12393	6.59191e-06	9.01829e-05	6.42213e-05	ADD1/Wbp2/Mnn1/sno/woc/Hcf/Su(var)205/bon/atms/msl-2/Nap1/Wdr82/MBD-R2/caz/Elys/Iswi/escl/wcy/Lam/Nph/REPTOR-BP/Smr/HIPP1/Taf10b/Set/CG9890/Pc/nej/Ssrp/ebi/osa/pho/Pcl/pita/ph-d/Asx/Top2/Gcn5/Etl1/Sec13/dre4/Su(var)3-3/e(y)3/Sin3A/Ddx1/Nlp/SMC1/SA/Lpt/CG1647/CG14667/Sbf/Nup50/Fer2/Rcc1/kis/Chd1/sba/Cap-D3/wge/Utx/nsl1/Su(z)2/MAN1/PCNA2/vtd/SoxN/SMC3/corto/pzg/Nup154/nclb/Tor/Alh/Mi-2/su(Hw)/Hers/…
GO:MF	cysteine-type peptidase activity	GO:0008234	35/3083	71/12393	7.36575e-06	9.86704e-05	7.02654e-05	Usp7/CG10098/Cp1/Usp2/Usp47/CG7332/Usp5/not/Ulp1/scny/puf/CG7222/Den1/CtsF/Duba/CalpA/DUBAI/Uch/Usp30/Usp32/26-29-p/CG32147/Usp15-31/CG4968/sol/Usp14/PIG-K/Atg4b/Uch-L5/Usp1/Usp10/pira/faf/CG1440/l(3)72Dr
GO:MF	phosphatase activity	GO:0016791	72/3083	182/12393	7.73212e-06	0.000101464	7.22551e-05	flw/sp3/Sac1/Lpin/CG12173/CG1637/Synj/CG12237/Ptp10D/CG11050/Ipp/CG14411/CG12091/INPP5E/Nt5a/Ptp4E/wun/CG7115/CG5567/CG42271/Dd/CG9391/janA/CG11474/Nt5b/cu/Ptp61F/5PtaseI/Pp2B-14D/Ocrl/Nt5c/CG34183/Ptpmeg2/FIG4/Mppe/alph/twe/csw/CG10417/Gs1l/CG6805/CG16890/Pdp/Mipp2/PRL-1/CG6707/CG17294/Acph-1/CG10376/CG17746/puc/Epp/CG2921/Fcp1/PpD3/Pp1alpha-96A/mtm/Pten/Ptp69D/Pp2C1/Pp4-19C/PNKP/Pgam5/CG10089/C…
GO:MF	protein folding chaperone	GO:0044183	24/3083	42/12393	8.12287e-06	0.000102412	7.29298e-05	Trap1/CG2918/CCT3/zda/CCT2/Hsp60A/CCT6/Hsc70Cb/CCT8/CG34150/CG10674/CG11267/mrj/Hsc70-5/Gp93/CCT7/Hsc70-1/CCT4/ClpX/Hsc70-4/Pfdn1/Hsp70Ba/Pfdn2/Nrd1
GO:MF	deubiquitinase activity	GO:0101005	24/3083	42/12393	8.12287e-06	0.000102412	7.29298e-05	Usp7/Usp2/Usp47/CG7332/Usp5/not/scny/puf/CG7222/Duba/DUBAI/Uch/Usp30/Usp32/Usp15-31/CG4968/Usp14/CG2224/eIF3h/Uch-L5/Rpn11/Usp1/Usp10/faf
GO:MF	phosphoric ester hydrolase activity	GO:0042578	82/3083	215/12393	9.78817e-06	0.000121034	8.61914e-05	Pde11/CG16717/flw/sp3/Sac1/Lpin/CG12173/CG1637/Synj/CG12237/Ptp10D/CG11050/Ipp/CG14411/CG12091/INPP5E/Nt5a/Ptp4E/wun/CG7115/CG5567/CG42271/Dd/CG9391/janA/CG11474/Nt5b/cu/Ptp61F/5PtaseI/Pp2B-14D/CG2818/Ocrl/Nt5c/CG34183/Ptpmeg2/FIG4/pn/Fic/Mppe/alph/PGAP5/twe/csw/CG10417/Gs1l/CG6805/CG16890/Pdp/Mipp2/PRL-1/CG6707/CG17294/Acph-1/CG10376/CG17746/puc/Epp/CG14883/CG2921/Fcp1/PpD3/CG18135/Pp1alpha-96A/…
GO:MF	ATP-dependent activity	GO:0140657	143/3083	422/12393	1.53737e-05	0.000186515	0.000132822	kl-3/Vha26/comt/Trap1/Acsl/CG2918/TER94/Helz/Atpalpha/zip/Khc/Rs1/CG31729/Uba1/VhaSFD/rin/Khc-73/Rpt6/SPoCk/CG1598/Afg3l2/Sec61beta/CCT3/ATP8A/Nsf2/ABCB7/Eato/CCT2/Abcd3/SERCA/Rpt5/CG1703/CG17646/Hsp60A/pix/Kif3C/Vha44/VhaAC39-1/CCT6/Iswi/CG3262/Hsc70Cb/CCT8/PMCA/Klp64D/nmd/Fatp1/Dhc64C/Atet/CG11267/Lon/Mtr4/Hsc70-5/Vha36-1/CG1824/Myo95E/CG33298/Rpt2/Hmt-1/Vha68-1/Vps4/RecQ5/Gp93/CG7483/Top2/CCT7…
GO:MF	identical protein binding	GO:0042802	60/3083	148/12393	1.80747e-05	0.000215222	0.000153265	Pfk/Septin2/CadN/atl/pnut/14-3-3zeta/Dlc90F/Tpi/Khc-73/GlyP/inc/rdx/Pak3/dbo/Madm/slpr/Roe1/GstO2/snf/orb2/Trxr-1/TppII/trsn/Gdh/REPTOR-BP/KLHL18/CG4239/Syx5/Gpdh1/Golgin84/Blos2/Liprin-gamma/Fmr1/Dscam3/ACOX1/Meltrin/Fic/da/oc/Acph-1/step/Syt1/CTPsyn/Coprox/corto/Dscam2/CG42259/robo2/aralar1/wek/Keap1/Septin1/GckIII/CtBP/Psn/MBD-like/Scr/Scm/rpr/ncd
GO:MF	ligase activity	GO:0016874	59/3083	146/12393	2.36867e-05	0.000276919	0.0001972	Acsl/Gclc/ThrRS/blw/AdSS/ATPsyngamma/Uba1/ATPsynbeta/TyrRS/ATPsynF/ScsbetaG/TTLL4A/CG1578/GatA/AspRS-m/ATPsynD/TrpRS/AlaRS/ATPsynCF6/sun/Fatp1/bur/CysRS-m/Scsalpha1/ScsbetaA/Nadsyn/alpha-PheRS/Uba4/DIP2/SerRS/Hcs/ATPsyndelta/LeuRS/Naprt/ATPsynbetaL/TyrRS-m/TrpRS-m/ATPsynE/GlyRS/ATPsynO/ATPsynG/ATPsynC/CTPsyn/IleRS/GatB/AsnRS/CG3961/r/TTLL15/Aos1/Uba5/APP-BP1/Slimp/ACC/PheRS-m/ArgRS/ArgRS-m/Taf1/R…
GO:MF	catalytic activity, acting on RNA	GO:0140098	97/3083	270/12393	2.8633e-05	0.000328768	0.000234123	Rat1/Prp18/ThrRS/Pop2/Rs1/rin/drosha/AGO2/TyrRS/CG6094/bin3/GatA/CG1307/AspRS-m/TrpRS/AlaRS/CG12375/CG14903/CG3434/Nbr/twin/Polr2K/CG14100/PAN2/CG14618/cu/Polr2J/CysRS-m/Mtr4/Polr2F/Ire1/Polr2H/Trm7-32/alpha-PheRS/CG7483/Snp/rswl/Polr2A/CG1750/CG9143/SerRS/Polr2L/Ddx1/CG10214/Dbp45A/LeuRS/mahe/Tgt/CG7878/Smg6/fid/TyrRS-m/CG1074/CG10903/TrpRS-m/CG11342/Polr3I/GlyRS/Rai1/CG9386/Polr2B/aub/RNaseX25/…
GO:MF	catalytic activity, acting on a nucleic acid	GO:0140640	132/3083	390/12393	3.44717e-05	0.000388865	0.00027692	Rat1/Prp18/Drep4/Helz/ThrRS/Pop2/Rs1/rin/drosha/AGO2/TyrRS/CG6094/bin3/GatA/CG1307/AspRS-m/TrpRS/Iswi/AlaRS/CG12375/Tdg/CG14903/CG3434/Nbr/twin/Polr2K/CG14100/PAN2/CG14618/cu/Polr2J/CysRS-m/Mtr4/Polr2F/Ire1/phr/Polr2H/Trm7-32/RecQ5/alpha-PheRS/CG7483/Snp/rswl/Top2/Etl1/Polr2A/CG1750/Blm/spn-A/CG9143/SerRS/Polr2L/Ddx1/CG10214/Dbp45A/LeuRS/mahe/Tgt/CG7878/Smg6/fid/TyrRS-m/CG3308/CG1074/CG10903/TrpR…
GO:MF	SNAP receptor activity	GO:0005484	16/3083	25/12393	3.95685e-05	0.000438665	0.000312383	Syx7/Use1/Syx13/Syx18/Vti1b/nSyb/Bet1/Sec22/Syx6/Syx5/Ykt6/Vamp7/Syx17/Syx8/Gos28/Snap25
GO:MF	signal sequence binding	GO:0005048	18/3083	30/12393	4.56079e-05	0.000497048	0.000353959	KdelR/CG31229/Sec61alpha/Tnpo/Sec24AB/Tom70/Pex19/Srp14/Srp68/Srp54k/Su(fu)/Pex5/Arts/Kap-alpha3/Kap-alpha1/Apl/Nup98-96/Fs(2)Ket
GO:MF	ubiquitin binding	GO:0043130	21/3083	38/12393	5.89798e-05	0.000632067	0.000450109	TSG101/CG12024/Npl4/Mvb12/hyd/Stam/Rad23/rngo/CG3529/CG5445/CG4968/Rae1/CG2701/Gga/Rpn13/Hrs/CG10435/p47/Vps13D/Plap/Faf2
GO:MF	transcription coactivator activity	GO:0003713	37/3083	83/12393	6.85962e-05	0.000723071	0.000514915	mnb/exd/Lpin/lgs/Wbp2/Hcf/arm/dmpd/mam/CG6013/MED6/crc/Ssb-c31a/CG10555/CG17202/Taf11/nej/Bgb/Mad/e(y)3/Lpt/srl/CG11710/trr/Utx/kto/MED20/Spt3/pygo/Bap60/MED4/Saf6/MTA1-like/CtBP/mbf1/e(y)2/NC2alpha
GO:MF	chaperone binding	GO:0051087	23/3083	44/12393	8.47581e-05	0.000879023	0.000625972	CG7945/HIP-R/DnaJ-H/CG11779/Roe1/Hsp60A/Droj2/Pfdn6/CG11267/mrj/ph-d/Fic/Hsc70-4/Cdc37/CG8206/STUB1/Tango1/p23/P58IPK/CG1416/HIP/Hsc20/CG12379
GO:MF	phosphatidylinositol phosphate phosphatase activity	GO:0052866	12/3083	17/12393	9.3706e-05	0.000956396	0.000681071	sp3/Sac1/Synj/CG14411/INPP5E/CG42271/Ocrl/FIG4/CG6805/CG6707/mtm/Pten
GO:MF	clathrin binding	GO:0030276	15/3083	24/12393	0.000103356	0.00103841	0.000739473	Syt4/lap/lqf/Hip1/AP-1gamma/AP-1-2beta/BicD/CG3529/AP-2sigma/lqfR/AP-1sigma/Afti/Gga/Syt1/AP-2alpha
GO:MF	ubiquitin-like protein conjugating enzyme activity	GO:0061650	17/3083	29/12393	0.000111854	0.00110649	0.000787958	Ubc2/UbcE2H/ben/Bruce/Ubc6/Ufc1/Ubc4/Atg10/CG7220/CG8188/CG7656/lwr/UbcE2M/Ubc10/CG2924/CG5823/Taf1
GO:MF	phosphatidylinositol binding	GO:0035091	42/3083	100/12393	0.000122763	0.00119264	0.000849309	nwk/baz/qvr/CG18659/lap/CG1902/rdgB/Snx3/Asap/Snx21/Snx27/Hip1/beta-Spec/Stam/hob/sau/CG3529/CG5973/Snx17/kmr/Atg18b/Snx6/vib/CG11975/Moe/Ttd14/cert/Gga/step/Arfip/Itpr/Hrs/Klp98A/Gprk1/Svil/CG7156/Snx1/Gel/SH3PX1/Atg18a/Rbpn-5/Rubicon
GO:MF	protein domain specific binding	GO:0019904	35/3083	79/12393	0.000124272	0.00119264	0.000849309	pico/Ctr9/fz2/Dlc90F/ena/aop/tub/cindr/Nedd4/Vap33/Nak/fra/gro/Ndfip/Ubc6/Ssrp/chico/RhoGAP92B/CG12384/Dys/Cbl/PICK1/hid/STUB1/Ack/dsh/Arfip/Abi/Pten/nkd/Bap60/imd/Arl1/sd/e(y)2
GO:MF	signaling adaptor activity	GO:0035591	16/3083	27/12393	0.000149439	0.00141308	0.00100628	CG44085/drk/Prosap/hep/Sarm/csw/cos/syd/Aplip1/dsh/ckn/cnk/Dab/Wdr59/wek/Gbeta5
GO:MF	molecular function inhibitor activity	GO:0140678	76/3083	210/12393	0.00015415	0.0014365	0.00102296	RhoGEF3/Hasp/mnb/siz/Vav/CG18659/CG9098/Kdm5/Bet3/sigmar/CG34393/sif/garz/Nedd4/CG14408/Bruce/Cdep/Dad/Efa6/Trs31/RtGEF/Lamtor1/vimar/spg/Drep1/C3G/Mcr/CG4497/RhoGAP1A/Wnk/Lamtor3/CG7369/I-2/Mon1/CG34423/eEF1delta/Ziz/PsGEF/HPS4/eIF2Balpha/endos/pcs/Gapvd1/Bet5/CG3862/Sec71/ric8a/pns/Diap2/HPS1/CG13994/eIF2Bbeta/Crag/step/Sbf/Rcc1/REG/CG4853/Tap42/MYPT-75D/CG42674/CG8066/EndoGI/Spn55B/Rab3-GEF/Mb…
GO:MF	actin binding	GO:0003779	50/3083	126/12393	0.000164456	0.00151064	0.00107576	Arpc3A/Msp300/SCAR/futsch/zip/pnut/shi/capt/Hip1/beta-Spec/cib/pod1/Actn/hts/Arp2/DCP2/Frl/Arpc5/CLIP-190/Vps16A/Unc-115a/Tm1/Arpc2/Myo95E/Arp3/alpha-Spec/kel/Cortactin/Vrp1/DAAM/Dys/Moe/alpha-Catr/Akap200/Arpc4/cpb/sn/jar/psidin/CG30183/twf/form3/Spn/Svil/lva/alpha-Cat/Gel/bif/cpa/cora
GO:MF	actin filament binding	GO:0051015	36/3083	83/12393	0.000169256	0.00153284	0.00109157	Arpc3A/Msp300/zip/Hip1/beta-Spec/pod1/Actn/hts/Arp2/DCP2/Frl/Arpc5/Unc-115a/Tm1/Arpc2/Myo95E/Arp3/alpha-Spec/Cortactin/Vrp1/Dys/alpha-Catr/Akap200/Arpc4/cpb/sn/jar/psidin/twf/Spn/Svil/lva/alpha-Cat/Gel/bif/cpa
GO:MF	proton-transporting ATP synthase activity, rotational mechanism	GO:0046933	13/3083	20/12393	0.000171836	0.00153459	0.00109282	blw/ATPsyngamma/ATPsynbeta/ATPsynF/ATPsynD/ATPsynCF6/sun/ATPsyndelta/ATPsynbetaL/ATPsynE/ATPsynO/ATPsynG/ATPsynC
GO:MF	calcium ion binding	GO:0005509	73/3083	202/12393	0.000216466	0.00188851	0.00134485	Cbp53E/sli/Dap160/LpR2/AnxB10/Calr/Frq1/Cnx99A/LpR1/CadN/Frq2/NUCB1/Lrp4/elm/SP2353/Syt4/scf/SCaMC/Cad87A/Eip63F-1/Gpo1/Eps-15/CG31650/CadN2/rho-4/CG32373/alpha-Man-Ib/stan/Actn/Reps/Past1/CalpA/AnxB11/Clic/Usp32/CanB2/Cad96Ca/Stim/MICU3/Ret/CG6454/alpha-Spec/CG17493/Tbc1d8-9/Edem1/Dg/CG11377/Mlc-c/CG31345/CG17593/CalpC/Cbl/MICU1/Syt1/sqh/Alg-2/CG5276/Cadps/Mctp/Gpo2/Swip-1/Naam/CG17765/Megf8/Cub…
GO:MF	polyubiquitin modification-dependent protein binding	GO:0031593	12/3083	18/12393	0.000217341	0.00188851	0.00134485	TER94/Npl4/Rad23/ref(2)P/key/Ufd1/Rpn10/Ubqn/CG3223/CG8209/morgue/Vps13D
GO:MF	proton channel activity	GO:0015252	14/3083	23/12393	0.000264034	0.00226365	0.001612	blw/ATPsyngamma/ATPsynbeta/ATPsynF/OtopLc/ATPsynD/ATPsynCF6/sun/ATPsyndelta/ATPsynbetaL/ATPsynE/ATPsynO/ATPsynG/ATPsynC
GO:MF	deacetylase activity	GO:0019213	10/3083	14/12393	0.000324585	0.00274616	0.0019556	Sirt4/Sirt1/Sirt2/PIG-L/sfl/HDAC6/CG17065/HDAC4/HDAC11/Sirt7
GO:MF	catalytic activity, acting on a tRNA	GO:0140101	36/3083	86/12393	0.000393077	0.00328245	0.00233751	ThrRS/TyrRS/CG6094/GatA/CG1307/AspRS-m/TrpRS/AlaRS/CG14903/CG3434/CG14618/CysRS-m/Trm7-32/alpha-PheRS/rswl/CG1750/SerRS/LeuRS/Tgt/fid/TyrRS-m/CG1074/TrpRS-m/GlyRS/CG9386/CG18048/IleRS/Trm7-34/GatB/AsnRS/Dtd/Slimp/PheRS-m/Mettl2/ArgRS/ArgRS-m
GO:MF	phosphatase regulator activity	GO:0019208	18/3083	34/12393	0.000405056	0.00333912	0.00237786	tws/PPP4R2r/sra/CG4497/CanB2/I-2/wrd/Pp2A-29B/endos/flfl/fmt/CG13994/Ptpa/PPP1R15/Tap42/MYPT-75D/Mbs/uri
GO:MF	amide binding	GO:0033218	42/3083	105/12393	0.000434617	0.00353745	0.0025191	KdelR/FASN1/AstC-R2/CG3662/CG31229/Sec61alpha/CG8814/Fkbp59/Psa/Tnpo/Naa80/TrissinR/Sec24AB/Tom70/AstA-R1/Pex19/CG30392/Srp14/Srp68/cyp33/Srp54k/AstC-R1/Su(fu)/Moca-cyp/CG2852/Pex5/Arts/sNPF-R/cert/CG15537/CG14715/CG17896/CG14232/APP-BP1/Kap-alpha3/NPFR/InR/Kap-alpha1/CG32473/Apl/Nup98-96/Fs(2)Ket
GO:MF	translation initiation factor activity	GO:0003743	24/3083	51/12393	0.00047625	0.00382786	0.0027259	mxt/eIF5/eIF3j/eIF4E1/eIF4H1/eIF3a/mRpL49/eIF3d1/eIF2beta/eIF4EHP/eIF2Balpha/mIF2/eIF2alpha/eIF3g1/eIF4G1/NAT1/eIF2Bbeta/eIF2gamma/CG31957/eIF3h/eIF1A/eIF5B/eIF2Bgamma/eIF3b
GO:MF	protein phosphatase binding	GO:0019903	17/3083	32/12393	0.000555028	0.00440596	0.00313758	pico/CG7029/arm/ZAP3/Sara/Gbs-76A/Nop17l/I-2/fmt/CG13994/ckn/Ankle2/PPP1R15/Tap42/MYPT-75D/CG9933/CG31457
GO:MF	modification-dependent protein binding	GO:0140030	23/3083	49/12393	0.000649705	0.00509464	0.00362801	TER94/ADD1/Npl4/Su(var)205/Graf/Rad23/ref(2)P/key/Ufd1/Rpn10/Ubqn/Pc/CG3223/CG8209/Ing5/Brd7-9/morgue/Cap-D3/pygo/CG17440/Vps13D/HP1c/msl-3
GO:MF	protein homodimerization activity	GO:0042803	47/3083	123/12393	0.000691408	0.00535633	0.00381436	Septin2/CadN/pnut/14-3-3zeta/Dlc90F/Tpi/Khc-73/GlyP/inc/rdx/Pak3/dbo/Madm/slpr/Roe1/GstO2/Trxr-1/trsn/REPTOR-BP/KLHL18/Syx5/Gpdh1/Golgin84/Blos2/Liprin-gamma/Fmr1/ACOX1/Fic/da/oc/Acph-1/step/Syt1/Coprox/corto/CG42259/robo2/wek/Keap1/Septin1/GckIII/CtBP/Psn/MBD-like/Scr/rpr/ncd
GO:MF	lipid transporter activity	GO:0005319	27/3083	61/12393	0.00072622	0.00555904	0.00395872	slmo/scramb1/CG31729/prel/CG1902/ATP8A/rdgB/Eato/Abcd3/CG3860/Npc2a/Npc1a/Osbp/Fatp1/CG33298/CG30392/vib/cert/Abca3/CG13893/CG32485/ScpX/apolpp/scramb2/CG30109/cv-d/GramD1B
GO:MF	ATPase regulator activity	GO:0060590	16/3083	30/12393	0.000761196	0.00569127	0.00405288	CG7945/alphaSnap/nrv3/Vta1/Roe1/CG7394/CG34423/Acf/sqh/CG1416/CG10973/Hsc20/CG8531/TORIP/barr/mrn
GO:MF	prenyltransferase activity	GO:0004659	10/3083	15/12393	0.000756273	0.00569127	0.00405288	Cox10/RabGGTb/Fnta/Fntb/Pdss2/Tango14/qless/temp/Fpps/betaggt-I
GO:MF	DNA-binding transcription factor binding	GO:0140297	36/3083	89/12393	0.000848734	0.00627283	0.00446702	tou/E2f1/exd/cic/Dp/arm/Crtc/bin3/alien/gro/Iswi/crc/rl/nej/ebi/MED19/Mad/gce/dome/da/lilli/Su(fu)/cos/Bin1/bs/ebd1/Ack/Su(var)2-10/CG9650/brm/Gug/Bap60/CtBP/NC2alpha/kay/abd-A
GO:MF	ATP-dependent protein folding chaperone	GO:0140662	17/3083	33/12393	0.000881301	0.00630965	0.00449324	Trap1/CG2918/CCT3/CCT2/Hsp60A/CCT6/Hsc70Cb/CCT8/CG11267/Hsc70-5/Gp93/CCT7/Hsc70-1/CCT4/ClpX/Hsc70-4/Hsp70Ba
GO:MF	exoribonuclease activity	GO:0004532	12/3083	20/12393	0.000883155	0.00630965	0.00449324	Rat1/Pop2/Nbr/twin/PAN2/cu/Snp/CG10214/Rai1/Rexo5/CG16790/Rrp6
GO:MF	exoribonuclease activity, producing 5'-phosphomonoesters	GO:0016896	12/3083	20/12393	0.000883155	0.00630965	0.00449324	Rat1/Pop2/Nbr/twin/PAN2/cu/Snp/CG10214/Rai1/Rexo5/CG16790/Rrp6
GO:MF	hydrolase activity, acting on ester bonds	GO:0016788	150/3083	482/12393	0.000923149	0.00645201	0.00459462	Rat1/Pde11/CG16717/Drep4/flw/sp3/Bem46/ThrRS/Sac1/Lpin/CG12173/Pop2/CG16986/CG1637/Synj/Hydr2/Tudor-SN/CG1309/CG12237/CG15111/Ptp10D/drosha/CG11050/Ipp/CG5068/AGO2/Hmu/CG14411/CG6094/CG12091/INPP5E/CG5191/Nt5a/Ptp4E/wun/CG7115/CG4390/CG1307/CG5567/AlaRS/CG42271/CG12375/CG5412/Dd/CG9391/Hydr1/CG14903/janA/Nbr/CG11474/twin/PAN2/PGAP1/Nt5b/cu/Ptp61F/CG16985/inaE/5PtaseI/Pp2B-14D/Ire1/sfl/CG2818/Ocrl…
GO:MF	magnesium ion binding	GO:0000287	23/3083	50/12393	0.000922877	0.00645201	0.00459462	PyK/Eno/CG12173/CG31729/dop/ATP8A/Idh3a/Wee1/CG13390/CG33298/alpha-PheRS/alph/Nurf-38/CG2246/Pgm2a/Pgm1/nst/rnh1/awd/Fen1/Miro/Nmdmc/Idh
GO:MF	phosphatidylinositol bisphosphate phosphatase activity	GO:0034593	9/3083	13/12393	0.000945445	0.00653678	0.00465499	Synj/INPP5E/CG42271/Ocrl/FIG4/CG6805/CG6707/mtm/Pten
GO:MF	phosphatase binding	GO:0019902	19/3083	39/12393	0.00107688	0.00728876	0.00519049	pico/CG7029/arm/ZAP3/Sara/Gbs-76A/Nop17l/CanB2/I-2/fmt/CG13994/Sbf/ckn/Ankle2/PPP1R15/Tap42/MYPT-75D/CG9933/CG31457
GO:MF	NAD binding	GO:0051287	19/3083	39/12393	0.00107688	0.00728876	0.00519049	Gapdh1/Men-b/Gapdh2/ND-51/Idh3a/Men/ND-49/Parp/Sirt4/Sirt1/Sirt2/Gpdh1/CG31673/CG9331/CtBP/Sirt7/Idh/Ndf/CG6287
GO:MF	clathrin adaptor activity	GO:0035615	8/3083	11/12393	0.00114107	0.00764278	0.00544259	Hip1/AP-1gamma/AP-1-2beta/AP-2sigma/AP-1sigma/Afti/Gga/AP-2alpha
GO:MF	protein phosphatase regulator activity	GO:0019888	16/3083	31/12393	0.00121252	0.00803763	0.00572378	tws/PPP4R2r/sra/CG4497/CanB2/I-2/wrd/Pp2A-29B/endos/flfl/fmt/CG13994/Ptpa/PPP1R15/Tap42/MYPT-75D
GO:MF	tubulin binding	GO:0015631	56/3083	156/12393	0.00133015	0.00872739	0.00621497	Kank/capu/CG2082/gammaTub23C/futsch/Arl8/pnut/shi/Khc/ReepA/Patronin/Khc-73/Tbce/chb/hook/ens/TTLL4A/wac/beta-Spec/nudE/Efa6/Kif3C/pod1/TBCC/Klp64D/CLIP-190/msps/alpha-Spec/Blos2/Apc/CG30389/Pcl/CG1890/CG14535/Eb1/Grip84/cos/Klp68D/Moe/Klp10A/mgr/Grip163/DCTN1-p150/tacc/jar/Drp1/apolpp/Klp98A/Mnat9/lva/awd/CG3226/spas/bif/TBCB/ncd
GO:MF	isomerase activity	GO:0016853	40/3083	104/12393	0.00144537	0.00938759	0.00668511	prtp/CaBP1/Pdi/ERp60/Pgi/Tpi/ERp44/dod/zda/Fkbp59/Su(P)/Qsox1/CG7849/Pglym78/Mpi/cyp33/Top2/Nop60B/Gale/Moca-cyp/CG2852/GstZ2/Ptpa/Pgm2a/p23/CG14715/Idi/Pgm1/nst/CG9008/Pus1/Inos/Rpi/Top1/CG10907/CG10467/CG1847/Ech1/CG7059/Pus7
GO:MF	peptide binding	GO:0042277	33/3083	82/12393	0.00151571	0.00974605	0.00694038	KdelR/AstC-R2/CG3662/CG31229/Sec61alpha/Psa/Tnpo/TrissinR/Sec24AB/Tom70/AstA-R1/Pex19/Srp14/Srp68/cyp33/Srp54k/AstC-R1/Su(fu)/Moca-cyp/CG2852/Pex5/Arts/sNPF-R/CG15537/APP-BP1/Kap-alpha3/NPFR/InR/Kap-alpha1/CG32473/Apl/Nup98-96/Fs(2)Ket
GO:MF	ATPase activator activity	GO:0001671	12/3083	21/12393	0.00159618	0.0101618	0.00723645	alphaSnap/nrv3/Vta1/CG7394/Acf/sqh/CG1416/Hsc20/CG8531/TORIP/barr/mrn
GO:MF	ubiquitin-like protein ligase binding	GO:0044389	29/3083	70/12393	0.00168888	0.0105432	0.00750804	Cul1/pnut/CG2993/Npl4/ben/dsd/rdx/Nedd8/CG11700/Axn/Ufd1/Leash/Cul3/CG7058/Ubc4/Cul5/Cul4/cos/Diap2/hid/Cul2/Ubc10/CG2218/CG5862/Atg8a/CG3226/Septin1/msl-1/rpr
GO:MF	cell adhesion molecule binding	GO:0050839	29/3083	70/12393	0.00168888	0.0105432	0.00750804	plum/CadN/CG2082/siz/fred/hbs/CG5758/cindr/CadN2/kirre/tei/arm/stan/Nrt/Ret/Dg/tutl/Dscam3/Cont/Moe/sns/mew/Abi/Dscam2/alpha-Cat/Bsg/mys/X11L/shv
GO:MF	structural constituent of ribosome	GO:0003735	94/3083	289/12393	0.00186089	0.0112882	0.00803861	mRpS25/mRpS23/RpL15/mRpL45/mRpL33/mRpS33/mRpL23/mRpS26/mRpL52/CG4866/mRpL27/RpS30/drosha/mRpL20/mRpL35/mRpL50/mRpL16/mRpS22/mRpL24/mRpL19/RpL36/mRpS11/mRpL21/mRpL17/CG11700/mRpL46/mRpL12/mRpL4/mRpS14/mRpL51/mRpS28/RpL27A/mRpL1/mRpL28/mRpS18A/mRpS5/mRpL3/mRpL32/RpL38/RpS26/mRpL18/mRpL37/mRpS6/mRpL43/mRpS30/mRpL39/mRpS16/mRpL40/RpL37b/RpS25/mRpS21/mRpS9/mRpL49/cav/mRpS18B/mRpS2/mRpS34/CG14817/mRpS7…
GO:MF	microtubule binding	GO:0008017	47/3083	128/12393	0.00184106	0.0112882	0.00803861	Kank/capu/gammaTub23C/futsch/pnut/shi/Khc/ReepA/Patronin/Khc-73/chb/hook/ens/wac/beta-Spec/nudE/Efa6/Kif3C/pod1/Klp64D/CLIP-190/msps/alpha-Spec/Apc/CG30389/Pcl/CG14535/Eb1/Grip84/cos/Klp68D/Moe/Klp10A/Grip163/DCTN1-p150/tacc/jar/Drp1/apolpp/Klp98A/Mnat9/lva/awd/spas/bif/TBCB/ncd
GO:MF	proton transmembrane transporter activity	GO:0015078	34/3083	86/12393	0.00185478	0.0112882	0.00803861	Vha26/Cyt-c1/lovit/blw/ATPsyngamma/ATPsynbeta/VhaSFD/Nhe2/ATPsynF/OtopLc/COX4/RFeSP/Vha44/VhaAC39-1/ATPsynD/ATPsynCF6/sun/Vha36-1/Nhe1/Vha68-1/COX5B/Nhe3/Vha100-1/Vha14-1/ATPsyndelta/VhaPPA1-1/ATPsynbetaL/ATPsynE/ATPsynO/ATPsynG/ATPsynC/UQCR-11/CG9706/VGAT
GO:MF	basal transcription machinery binding	GO:0001098	17/3083	35/12393	0.00203395	0.0121096	0.00862348	Ctr9/Su(var)205/Taf4/atms/TfIIFbeta/wcy/TfIIA-L/CG9018/TfIIEbeta/CG15019/hyx/Trf/spt4/Pcf11/e(y)2/Taf1/CG4266
GO:MF	basal RNA polymerase II transcription machinery binding	GO:0001099	17/3083	35/12393	0.00203395	0.0121096	0.00862348	Ctr9/Su(var)205/Taf4/atms/TfIIFbeta/wcy/TfIIA-L/CG9018/TfIIEbeta/CG15019/hyx/Trf/spt4/Pcf11/e(y)2/Taf1/CG4266
GO:MF	cargo adaptor activity	GO:0140312	9/3083	14/12393	0.00206299	0.0121698	0.00866636	cm/Hip1/AP-1gamma/AP-1-2beta/AP-2sigma/AP-1sigma/Afti/Gga/AP-2alpha
GO:MF	single-stranded RNA binding	GO:0003727	18/3083	38/12393	0.0021639	0.012379	0.00881539	shep/CG4612/Pabp2/Hrb87F/AGO2/Sxl/snf/Srp54/CG12375/U2af38/larp/Ddx1/Zn72D/Pep/Hrb98DE/CG31368/PAN3/Rrp6
GO:MF	aminoacyl-tRNA ligase activity	GO:0004812	18/3083	38/12393	0.0021639	0.012379	0.00881539	ThrRS/TyrRS/AspRS-m/TrpRS/AlaRS/CysRS-m/alpha-PheRS/SerRS/LeuRS/TyrRS-m/TrpRS-m/GlyRS/IleRS/AsnRS/Slimp/PheRS-m/ArgRS/ArgRS-m
GO:MF	ligase activity, forming carbon-oxygen bonds	GO:0016875	18/3083	38/12393	0.0021639	0.012379	0.00881539	ThrRS/TyrRS/AspRS-m/TrpRS/AlaRS/CysRS-m/alpha-PheRS/SerRS/LeuRS/TyrRS-m/TrpRS-m/GlyRS/IleRS/AsnRS/Slimp/PheRS-m/ArgRS/ArgRS-m
GO:MF	phospholipid transporter activity	GO:0005548	11/3083	19/12393	0.00217548	0.012379	0.00881539	slmo/scramb1/prel/rdgB/CG30392/vib/CG13893/CG32485/ScpX/scramb2/CG30109
GO:MF	ubiquitin protein ligase binding	GO:0031625	28/3083	68/12393	0.00224334	0.0126503	0.00900853	Cul1/pnut/CG2993/Npl4/ben/dsd/rdx/Nedd8/CG11700/Axn/Ufd1/Leash/Cul3/CG7058/Ubc4/Cul5/Cul4/cos/Diap2/hid/Cul2/Ubc10/CG2218/Atg8a/CG3226/Septin1/msl-1/rpr
GO:MF	heat shock protein binding	GO:0031072	19/3083	41/12393	0.00226249	0.0126503	0.00900853	HIP-R/DnaJ-H/Su(var)205/Droj2/CG6693/Tpr2/CG3061/Hsc70-5/Fic/Hsc70-1/Hsc70-4/CG10565/Cdc37/STUB1/p23/lwr/CG1416/Hsp70Ba/HIP
GO:MF	phosphoprotein phosphatase activity	GO:0004721	34/3083	87/12393	0.00232843	0.0129067	0.00919118	flw/Ptp10D/CG12091/Ptp4E/CG7115/Dd/janA/Ptp61F/Pp2B-14D/CG34183/Ptpmeg2/Mppe/alph/twe/csw/CG10417/Pdp/PRL-1/CG10376/CG17746/puc/Fcp1/PpD3/Pp1alpha-96A/mtm/Pten/Ptp69D/Pp2C1/Pp4-19C/Pgam5/CG10089/PTP-ER/Ptp99A/Ublcp1
GO:MF	exonuclease activity	GO:0004527	21/3083	47/12393	0.00237838	0.0130709	0.0093081	Rat1/Pop2/Nbr/twin/PAN2/cu/Snp/CG10214/CG6833/CG3308/PolD1/Rai1/CG5316/Rexo5/Cpsf73/CG12877/Pld3/CG16790/mre11/Rrp6/Fen1
GO:MF	histone demethylase activity	GO:0032452	8/3083	12/12393	0.00267593	0.0141035	0.0100434	Kdm5/Kdm2/CG10600/Kdm4B/Su(var)3-3/Utx/Jarid2/JMJD6
GO:MF	proteasome binding	GO:0070628	8/3083	12/12393	0.00267593	0.0141035	0.0100434	Usp2/Rad23/rngo/Ubqn/Ubc4/Usp14/Rpn13/Rpn11
GO:MF	poly-purine tract binding	GO:0070717	8/3083	12/12393	0.00267593	0.0141035	0.0100434	shep/CG4612/Pabp2/Hrb87F/Sxl/Ddx1/Hrb98DE/PAN3
GO:MF	phospholipid transfer activity	GO:0120014	8/3083	12/12393	0.00267593	0.0141035	0.0100434	slmo/prel/rdgB/CG30392/vib/CG13893/CG32485/CG30109
GO:MF	protein demethylase activity	GO:0140457	8/3083	12/12393	0.00267593	0.0141035	0.0100434	Kdm5/Kdm2/CG10600/Kdm4B/Su(var)3-3/Utx/Jarid2/JMJD6
GO:MF	hexosyltransferase activity	GO:0016758	43/3083	117/12393	0.0027534	0.0143938	0.0102501	FucT6/FucTA/Mgat2/Alg11/CG9395/CG4341/Pgant2/alpha4GT1/GlyP/CG3253/Mgat4a/C1GalTA/GlyS/CG31690/Pgant5/GalT1/CG8668/Stt3A/AGBE/wol/sxc/Csgalnact/kkv/FucTC/O-fut1/ttv/GlcAT-S/beta3GalTII/Alg3/Alg2/Pgant35A/Uggt/CG6659/brn/Alg12/GlcT/CG11357/Tmtc3/Alg13/Plod/alpha4GT2/Eogt/CG9485
GO:MF	3'-5'-exoribonuclease activity	GO:0000175	10/3083	17/12393	0.00296153	0.0152341	0.0108485	Pop2/Nbr/twin/PAN2/cu/Snp/CG10214/Rexo5/CG16790/Rrp6
GO:MF	nucleocytoplasmic carrier activity	GO:0140142	10/3083	17/12393	0.00296153	0.0152341	0.0108485	emb/Tnpo/Ranbp16/Ranbp21/Arts/Kap-alpha3/Kap-alpha1/ebo/Apl/Fs(2)Ket
GO:MF	syntaxin binding	GO:0019905		25/12393	0.00318666	0.0161341	0.0114894	gammaSnap1/alphaSnap/Rop/car/gammaSnap2/nSyb/Bet1/Vps16A/Vamp7/Vps52/cpx/Syt1/Snap25
GO:MF	ubiquitin conjugating enzyme activity	GO:0061631	13/3083	25/12393	0.00318666	0.0161341	0.0114894	Ubc2/UbcE2H/ben/Bruce/Ubc6/Ubc4/CG7220/CG8188/CG7656/Ubc10/CG2924/CG5823/Taf1
GO:MF	oxidoreductase activity, acting on a sulfur group of donors	GO:0016667	21/3083	48/12393	0.00325079	0.0163301	0.011629	CG7484/CG41378/CaBP1/MsrA/CG8993/ERp60/CG7430/SelR/cl/GstO2/Trxr-1/Qsox1/CG5554/Grx1/Trx-2/SelT/CG3939/GstO3/Txl/CG11007/CG14997
GO:MF	histone deacetylase activity	GO:0004407	7/3083	10/12393	0.00338775	0.0167563	0.0119326	Sirt4/Sirt1/Sirt2/HDAC6/HDAC4/HDAC11/Sirt7
GO:MF	protein deacetylase activity	GO:0033558	7/3083	10/12393	0.00338775	0.0167563	0.0119326	Sirt4/Sirt1/Sirt2/HDAC6/HDAC4/HDAC11/Sirt7
GO:MF	histone binding	GO:0042393	33/3083	86/12393	0.00376601	0.0184851	0.0131636	ADD1/sno/Su(var)205/cal1/P32/Stat92E/Nap1/Parp/Nph/Set/Pc/Ssrp/Ing5/Brd7-9/Df31/Nlp/mor/Lpt/kis/Chd1/Cap-D3/ear/pygo/Alh/Mi-2/brm/enok/CG17440/CG8677/HP1c/wds/msl-3/CG9246
GO:MF	cysteine-type endopeptidase activity	GO:0004197	16/3083	34/12393	0.00408325	0.0195935	0.013953	Usp7/Cp1/Usp47/Usp5/scny/puf/CtsF/CalpA/DUBAI/Usp30/26-29-p/sol/PIG-K/Usp1/pira/faf
GO:MF	disulfide oxidoreductase activity	GO:0015036	16/3083	34/12393	0.00408325	0.0195935	0.013953	CG7484/CaBP1/CG8993/ERp60/cl/GstO2/Trxr-1/Qsox1/CG5554/Grx1/Trx-2/SelT/CG3939/GstO3/Txl/CG11007
GO:MF	phosphatidylinositol-3-phosphate binding	GO:0032266	9/3083	15/12393	0.00402307	0.0195935	0.013953	Snx3/Snx27/sau/Atg18b/Snx6/CG11975/Klp98A/Snx1/Atg18a
GO:MF	tRNA binding	GO:0000049	17/3083	37/12393	0.0042388	0.0200408	0.0142715	TyrRS/Clbn/AlaRS/CG14618/CG2034/mIF2/alpha-PheRS/rswl/SerRS/fid/eIF2gamma/CG8078/SecS/IleRS/l(1)G0020/Slimp/PheRS-m
GO:MF	exonuclease activity, active with either ribo- or deoxyribonucleic acids and producing 5'-phosphomonoesters	GO:0016796	17/3083	37/12393	0.0042388	0.0200408	0.0142715	Rat1/Pop2/Nbr/twin/PAN2/cu/Snp/CG10214/CG3308/PolD1/Rai1/CG5316/Rexo5/Pld3/CG16790/mre11/Rrp6
GO:MF	myosin binding	GO:0017022	22/3083	52/12393	0.00432507	0.0202994	0.0144557	CG2258/zip/alphaTub84D/milt/inc/Nedd4/CLIP-190/Rab3/Mlc-c/Eb1/Socs16D/CG2765/sqh/aPKC/mib2/jar/Patj/CG18135/elgi/Bap60/smg/Kap-alpha3
GO:MF	ribonucleoprotein complex binding	GO:0043021	26/3083	65/12393	0.00504555	0.0235093	0.0167415	l(3)80Fj/orb/Der-1/Sec61alpha/SrpRalpha/orb2/Clbn/pix/Nmd3/clu/CG4679/CG7488/CG5116/CG33158/LTV1/barc/Prp31/Srp68/CG4957/eIF2alpha/Srp72/CG10565/CG11414/ecd/Zfrp8/SrpRbeta
GO:MF	protein carrier activity	GO:0140597	8/3083	13/12393	0.00544471	0.0251867	0.017936	EMC8-9/EMC1/OXA1L/EMC6/EMC4/CG4942/EMC3/YL-1
GO:MF	Hsp70 protein binding	GO:0030544	9/3083	16/12393	0.00718016	0.0329774	0.023484	HIP-R/DnaJ-H/Su(var)205/Droj2/CG3061/Fic/CG10565/STUB1/HIP
GO:MF	RNA polymerase II general transcription initiation factor binding	GO:0001091	7/3083	11/12393	0.00731944	0.0331437	0.0236023	Taf4/TfIIFbeta/TfIIA-L/TfIIEbeta/Trf/e(y)2/Taf1
GO:MF	lysophospholipid acyltransferase activity	GO:0071617	7/3083	11/12393	0.00731944	0.0331437	0.0236023	EndoB/frj/nes/EndoA/Agpat3/Agpat1/puml
GO:MF	electron transfer activity	GO:0009055	20/3083	48/12393	0.00778334	0.0347548	0.0247497	SdhA/Cyt-c1/ND-75/ND-30/SdhB/SdhC/ND-51/Cyt-c-p/COX4/ND-20/RFeSP/ND-49/COX5B/Fdx1/Etf-QO/wal/ND-24/UQCR-11/Fdx2/ND-23
GO:MF	anion channel activity	GO:0005253	14/3083	30/12393	0.00774381	0.0347548	0.0247497	CG15270/Clic/CG10353/Lcch3/CG3638/ClC-c/HisCl1/porin/Rdl/tty/ClC-b/GPHR/Axs/pHCl-1
GO:MF	calmodulin binding	GO:0005516	16/3083	36/12393	0.00807948	0.0358283	0.0255141	CG7766/Patronin/CG17528/Lk6/PhKgamma/Camta/SK/MAPk-Ak2/CanB2/poe/Pp2B-14D/CaMKI/Vha100-1/CG8475/Crag/jar
GO:MF	organophosphate ester transmembrane transporter activity	GO:0015605	8/3083	14/12393	0.00995367	0.043837	0.0312173	SCaMC/CG7943/Rim2/PMP34/sesB/CG9706/sll/MFS16
GO:MF	protein transmembrane transporter activity	GO:0008320	12/3083	25/12393	0.0102371	0.0444761	0.0316724	Trp1/Sec61beta/CG31229/Sec61alpha/CG8860/Tom7/Tim23/Tom40/Tom70/Hsc70-5/CG14894/Sec63
GO:MF	lipid transfer activity	GO:0120013	12/3083	25/12393	0.0102371	0.0444761	0.0316724	slmo/prel/CG1902/rdgB/Npc2a/CG30392/vib/cert/CG13893/CG32485/CG30109/GramD1B
GO:BP	mitochondrial translation	GO:0032543	92/3338	111/12653	9.60742e-36	2.81882e-32	1.5119e-32	mRpS25/mRpS23/mRpL45/mRpL33/mRpS33/mRpL23/mRpS26/mRpL52/mRpL27/drosha/mRpL20/bsf/mRpL35/mRpL50/mRpL16/mRpS22/mRpL24/CG6094/mRpL19/mRpS11/mRpL21/mRpL17/mRpL46/mRpL12/mEFTs/mRpL4/mRpS14/mRpL51/GatA/mRpS28/mRpL1/mRpL28/mRpS18A/mRpS5/mRpL3/mRpL32/mRpL18/mRpL37/mRpS6/mRpL43/mRpS30/mRpL39/mRpS16/mRpL40/CG4679/mRpS21/mRpS9/mRpL49/mRpS18B/mRpS2/mRpS34/mEFG1/mRpS7/mIF2/rswl/bonsai/mRpL38/mRpL14/mRpS24/CG3…
GO:BP	establishment of protein localization	GO:0045184	254/3338	493/12653	6.89466e-34	1.01145e-30	5.42501e-31	Trp1/comt/tbc/Ripalpha/CG34404/CG2918/TER94/TSG101/GABPI/gammaSnap1/boca/Sgt/Arl8/Sec24CD/CG2993/Syx7/Use1/alphaSnap/Tango9/Syx13/Tango5/Tpst/Scamp/Vps29/Rab11/Bet3/UQCR-C1/CG1598/Sec61beta/CG31229/zetaCOP/Spase22-23/milt/EMC8-9/Pex13/EMC1/rdx/garz/Madm/deltaCOP/CG11779/bai/Nsf2/Vps45/cm/Srp19/Sec61alpha/Snx21/CG7382/Roe1/Snx27/Abl/OXA1L/sgg/AP-1gamma/CG7639/Rop/Pink1/SrpRalpha/Clbn/Spase25/Ntf-2…
GO:BP	protein transport	GO:0015031	241/3338	465/12653	1.07583e-32	1.05216e-29	5.6434e-30	Trp1/comt/tbc/Ripalpha/CG2918/TER94/TSG101/GABPI/gammaSnap1/boca/Sgt/Arl8/Sec24CD/CG2993/Syx7/Use1/alphaSnap/Tango9/Syx13/Tango5/Tpst/Scamp/Vps29/Rab11/Bet3/UQCR-C1/CG1598/Sec61beta/CG31229/zetaCOP/Spase22-23/milt/Pex13/rdx/garz/Madm/deltaCOP/CG11779/bai/Nsf2/Vps45/cm/Srp19/Sec61alpha/Snx21/CG7382/Roe1/Snx27/Abl/OXA1L/sgg/AP-1gamma/CG7639/Rop/SrpRalpha/Clbn/Spase25/Ntf-2/CG8860/car/Hsp60A/AP-1-2b…
GO:BP	proteolysis involved in cellular protein catabolic process	GO:0051603	203/3338	370/12653	4.82735e-32	3.54086e-29	1.89918e-29	Calr/Cnx99A/Usp7/Cul1/TER94/ALiX/CG11658/shrb/Prosbeta3/CG9003/gzl/CG1317/CG6966/Prosbeta2/gcl/UbcE2H/Prosbeta6/CG12402/Cp1/Npl4/Uba1/Xbp1/Prosbeta5/Prosalpha4/ari-1/Der-2/Cdc27/Rpt6/Usp2/Kaz/Usp47/dco/Kdm2/Rpn6/Herc4/inc/rdx/Nedd4/fzr/Usp5/not/Nedd8/RYBP/Der-1/Ufl1/EloB/sordd1/scny/Rpn7/puf/CG11700/stx/Ate1/Bruce/dmpd/alpha-Man-Ib/sgg/Rpt5/Pink1/Clbn/Ubr3/CtsF/Stam/Rad23/Axn/pic/CG7148/Prosalpha…
GO:BP	mitochondrial gene expression	GO:0140053	100/3338	135/12653	4.05898e-31	2.38181e-28	1.27751e-28	mRpS25/mRpS23/mRpL45/mRpL33/mRpS33/mRpL23/mRpS26/mRpL52/mRpL27/drosha/mRpL20/bsf/mRpL35/mRpL50/mRpL16/mRpS22/mRpL24/CG6094/mRpL19/mRpS11/mRpL21/mRpL17/mRpL46/mRpL12/mEFTs/mRpL4/mRpS14/mRpL51/GatA/mRpS28/mRpL1/mRpL28/mRpS18A/mRpS5/mRpL3/mRpL32/mRpL18/mRpL37/mRpS6/mRpL43/mRpS30/mRpL39/mRpS16/CG2124/mRpL40/CG4679/Rim2/CG13850/mRpS21/mRpS9/mRpL49/mRpS18B/mRpS2/mRpS34/mEFG1/mRpS7/mIF2/rswl/bonsai/mRpL…
GO:BP	modification-dependent macromolecule catabolic process	GO:0043632	193/3338	351/12653	1.141e-30	5.57948e-28	2.99262e-28	Calr/Cnx99A/Usp7/Cul1/TER94/ALiX/CG11658/shrb/Prosbeta3/CG9003/gzl/CG1317/CG6966/Prosbeta2/gcl/UbcE2H/Prosbeta6/CG12402/Npl4/Uba1/Prosbeta5/Prosalpha4/ari-1/Der-2/Cdc27/Rpt6/Usp2/Kaz/Usp47/dco/Kdm2/Rpn6/Herc4/inc/rdx/Nedd4/fzr/Usp5/not/Nedd8/RYBP/Der-1/Ufl1/EloB/sordd1/scny/Rpn7/puf/CG11700/Ate1/Bruce/dmpd/alpha-Man-Ib/sgg/Rpt5/Pink1/Clbn/Ubr3/Stam/Rad23/Axn/pic/CG7148/Prosalpha3/CG2247/DUBAI/slm…
GO:BP	protein catabolic process	GO:0030163	208/3338	390/12653	1.59633e-30	6.69088e-28	3.58873e-28	Calr/Cnx99A/Usp7/Cul1/TER94/ALiX/CG11658/shrb/Prosbeta3/CG9003/gzl/CG1317/CG6966/Prosbeta2/gcl/UbcE2H/Prosbeta6/CG12402/Cp1/Npl4/Uba1/Xbp1/Prosbeta5/Prosalpha4/ari-1/Der-2/Cdc27/Rpt6/Usp2/Kaz/Usp47/dco/Kdm2/Rpn6/Herc4/inc/rdx/Nedd4/fzr/Usp5/not/Nedd8/RYBP/Der-1/Ufl1/EloB/sordd1/scny/Rpn7/puf/CG11700/stx/Ate1/Bruce/dmpd/alpha-Man-Ib/sgg/Rpt5/Pink1/Clbn/Ubr3/CtsF/Stam/Rad23/Axn/pic/CG7148/Prosalpha…
GO:BP	modification-dependent protein catabolic process	GO:0019941	189/3338	343/12653	3.29177e-30	1.09411e-27	5.86837e-28	Calr/Cnx99A/Usp7/Cul1/TER94/ALiX/CG11658/shrb/Prosbeta3/CG9003/gzl/CG1317/CG6966/Prosbeta2/gcl/UbcE2H/Prosbeta6/CG12402/Npl4/Uba1/Prosbeta5/Prosalpha4/ari-1/Der-2/Cdc27/Rpt6/Usp2/Kaz/Usp47/dco/Kdm2/Rpn6/Herc4/inc/rdx/Nedd4/fzr/Usp5/not/Nedd8/RYBP/Der-1/Ufl1/EloB/sordd1/scny/Rpn7/puf/CG11700/Ate1/Bruce/dmpd/alpha-Man-Ib/sgg/Rpt5/Pink1/Clbn/Ubr3/Stam/Rad23/Axn/pic/CG7148/Prosalpha3/CG2247/DUBAI/slm…
GO:BP	ubiquitin-dependent protein catabolic process	GO:0006511	187/3338	338/12653	3.35616e-30	1.09411e-27	5.86837e-28	Calr/Cnx99A/Usp7/Cul1/TER94/ALiX/CG11658/shrb/Prosbeta3/CG9003/gzl/CG1317/CG6966/Prosbeta2/gcl/UbcE2H/Prosbeta6/CG12402/Npl4/Uba1/Prosbeta5/Prosalpha4/ari-1/Der-2/Cdc27/Rpt6/Usp2/Kaz/Usp47/dco/Kdm2/Rpn6/Herc4/inc/rdx/Nedd4/fzr/Usp5/not/RYBP/Der-1/Ufl1/EloB/sordd1/scny/Rpn7/puf/Ate1/Bruce/dmpd/alpha-Man-Ib/sgg/Rpt5/Pink1/Clbn/Ubr3/Stam/Rad23/Axn/pic/CG7148/Prosalpha3/CG2247/DUBAI/slmb/Rpn3/Ufd1/CG…
GO:BP	intracellular protein transport	GO:0006886	189/3338	351/12653	1.68703e-28	4.94975e-26	2.65486e-26	Trp1/Ripalpha/CG2918/TER94/GABPI/gammaSnap1/boca/Sgt/Sec24CD/Syx7/alphaSnap/Syx13/Vps29/UQCR-C1/CG1598/Sec61beta/CG31229/zetaCOP/Spase22-23/milt/Pex13/rdx/CG11779/bai/Vps45/cm/Srp19/Sec61alpha/CG7382/Roe1/Snx27/Abl/OXA1L/sgg/AP-1gamma/CG7639/Rop/SrpRalpha/Clbn/Spase25/Ntf-2/CG8860/car/Hsp60A/AP-1-2beta/Stam/gammaCOP/emb/tral/cdm/Tom7/p24-1/Tim23/Tnpo/CG7394/AP-2sigma/Klp64D/gammaSnap2/lsn/CG13887…
GO:BP	cell junction organization	GO:0034330	197/3338	383/12653	2.66501e-26	6.58798e-24	3.53354e-24	DIP-lambda/plum/mnb/Frq1/Syn/CASK/loco/nwk/baz/dpr11/Atg1/Frq2/Octbeta2R/atl/Lrp4/DIP-delta/Sac1/Nlg4/futsch/Vav/dpr18/dpr13/Atpalpha/Arl8/shi/fz2/CG42673/dpr2/Synj/dpr1/ben/Rab11/Tbce/sff/drpr/ena/Srpk79D/Eps-15/cindr/kirre/Nedd4/C1GalTA/Pak3/dbo/Ulp1/Liprin-alpha/Nsf2/arm/stj/jeb/Rheb/Vap33/Cip4/p38b/CG7166/Abl/beta-Spec/sgg/Sdc/Dad/Nrx-IV/ND-20/S6k/wun/Mob2/stan/Fak/bchs/Syx18/Syn1/Nmnat/pod1/…
GO:BP	synapse organization	GO:0050808	170/3338	313/12653	2.69447e-26	6.58798e-24	3.53354e-24	DIP-lambda/plum/mnb/Frq1/Syn/CASK/nwk/baz/dpr11/Atg1/Frq2/Octbeta2R/atl/Lrp4/DIP-delta/Sac1/Nlg4/futsch/dpr18/dpr13/Atpalpha/Arl8/fz2/CG42673/dpr2/Synj/dpr1/ben/Rab11/Tbce/sff/drpr/ena/Srpk79D/Eps-15/Nedd4/C1GalTA/Pak3/dbo/Ulp1/Liprin-alpha/Nsf2/stj/jeb/Rheb/Vap33/Cip4/p38b/CG7166/Abl/beta-Spec/sgg/Sdc/Dad/Nrx-IV/ND-20/S6k/Mob2/stan/Fak/bchs/Syx18/Syn1/Nmnat/pod1/Atx2/Arp2/Nlg2/caz/Nf1/RtGEF/DIP-…
GO:BP	proteasomal protein catabolic process	GO:0010498	148/3338	268/12653	5.32955e-24	1.20284e-21	6.45156e-22	Calr/Cnx99A/Cul1/TER94/CG11658/Prosbeta3/CG9003/CG1317/Prosbeta2/gcl/UbcE2H/Prosbeta6/CG12402/Xbp1/Prosbeta5/Prosalpha4/ari-1/Der-2/Cdc27/Rpt6/Usp2/Kaz/Usp47/dco/Kdm2/Rpn6/inc/rdx/fzr/Usp5/RYBP/Der-1/Ufl1/EloB/sordd1/scny/Rpn7/stx/Ate1/dmpd/alpha-Man-Ib/sgg/Rpt5/Clbn/Ubr3/Rad23/Axn/pic/CG7148/Prosalpha3/CG2247/slmb/Rpn3/Ufd1/Pat1/Prosbeta7/Rpn10/CG5961/Prosalpha7/Ubc6/Rpn9/sordd2/Cul3/poe/Ube4A/C…
GO:BP	Golgi vesicle transport	GO:0048193	99/3338	153/12653	1.91059e-23	4.00405e-21	2.14762e-21	comt/GABPI/boca/KdelR/Sec24CD/CG7011/Use1/alphaSnap/CG31729/Rab11/Cog1/Bet3/zetaCOP/CG5946/Snx3/Madm/deltaCOP/bai/Nsf2/GM130/AP-1gamma/ArfGAP3/Syx18/Trs31/gammaCOP/GCC88/CG5510/gry/CG9536/p24-1/sau/CG13887/CG9067/fidipidine/brun/opm/Sec24AB/Bet1/CG15099/Exo84/Sec22/Syx6/PGAP1/Syx5/Sec23/Sar1/Golgin84/Ykt6/SIDL/Sec10/epsilonCOP/ergic53/CG11857/S/CG17883/betaCOP/Cog6/Sec13/Bet5/CG32576/CG32069/Arfr…
GO:BP	positive regulation of cellular component organization	GO:0051130	146/3338	272/12653	4.52314e-22	8.84725e-20	4.74532e-20	mnb/CASK/nwk/Usp7/pico/Cul1/Octbeta2R/atl/Marf/SCAR/Vav/Syt4/Sec24CD/Pkc53E/shi/wde/lap/Syx7/Synj/svr/prd1/spoon/AMPKalpha/drpr/ena/dco/cindr/sif/chb/garz/Nedd4/Pak3/Su(var)205/Ulp1/nudC/Rheb/p38b/Abl/GM130/nudE/sgg/Sdc/Rop/Graf/Pink1/S6k/stan/Stat92E/BicD/Atx2/Arp2/G9a/caz/drk/stau/Tao/Naus/CG9231/slmb/Lam/nSyb/LRR/raptor/RhoGAP68F/Smn/cnn/msps/bur/Akt/Sec23/CG6454/hep/Arp3/Ssrp/Nrx-1/wit/Sar1/P…
GO:BP	proteasome-mediated ubiquitin-dependent protein catabolic process	GO:0043161	137/3338	250/12653	6.95981e-22	1.27626e-19	6.84534e-20	Calr/Cnx99A/Cul1/TER94/CG11658/Prosbeta3/CG9003/CG1317/Prosbeta2/gcl/UbcE2H/Prosbeta6/CG12402/Prosbeta5/Prosalpha4/ari-1/Der-2/Cdc27/Rpt6/Kaz/Usp47/dco/Kdm2/Rpn6/inc/rdx/fzr/Usp5/RYBP/Der-1/Ufl1/EloB/Rpn7/Ate1/dmpd/alpha-Man-Ib/sgg/Rpt5/Clbn/Ubr3/Rad23/Axn/pic/CG7148/Prosalpha3/CG2247/slmb/Rpn3/Ufd1/Pat1/Prosbeta7/Rpn10/CG5961/Prosalpha7/Ubc6/Rpn9/Cul3/poe/Ube4A/CG7058/Ubc4/pall/DCAF12/Rpt2/jet/C…
GO:BP	endocytosis	GO:0006897	107/3338	178/12653	1.6027e-21	2.76607e-19	1.48361e-19	Dap160/LpR2/EndoB/mnb/CG9132/CASK/LpR1/CG2258/CG2747/Nlg4/Pkc53E/shi/CG18659/lap/Syx7/CG31729/Synj/Vps29/Rab11/ArfGAP1/CG41099/drpr/aop/dco/Eps-15/lqf/Tsp42Ej/cindr/DCTN2-p50/aux/hook/garz/Nedd4/Rlip/Vps45/cm/stj/Nak/Hip1/EndoA/Graf/car/BicD/Reps/Nlg2/drk/Past1/Pcyt1/Tao/vap/AP-2sigma/rudhira/Mcr/Vps35/tweek/ktub/Rho1/hep/lqfR/Rab4/Nrx-1/CG8176/Rab35/O-fut1/Ocrl/crq/Cortactin/Synd/Su(dx)/Sec71/Cb…
GO:BP	regulation of catabolic process	GO:0009894	159/3338	310/12653	2.93907e-21	4.79069e-19	2.56954e-19	Ras85D/Actbeta/Cul1/Atg1/TER94/CG5026/Dora/shi/UbcE2H/Pop2/SREBP/Synj/Xbp1/Pabp2/ari-1/sima/Usp2/Usp47/AMPKalpha/bsf/Sec61beta/Rga/sigmar/Sod2/GlyP/dco/rdx/Sik3/Lkb1/Not1/Nedd4/Raf/fzr/Usp5/Ufl1/EloB/sordd1/GlyS/scny/Sec61alpha/Rheb/Bruce/sgg/Pink1/S6k/Gyf/AP-1-2beta/Doa/Axn/pic/Acn/slmb/Rpn3/Ufd1/wcy/DCP2/raptor/Ubc6/CG2124/twin/PAN2/RabX1/rl/Socs36E/poe/CG13850/Lon/Ythdf/CG8155/Akt/schlank/hep/…
GO:BP	regulation of intracellular signal transduction	GO:1902531	179/3338	368/12653	1.59161e-20	2.45778e-18	1.31826e-18	RhoGEF3/RapGAP1/mnb/Ras85D/Usp7/HUWE1/Cul1/CG2918/Atg1/ALiX/flw/siz/Sac1/Vav/Ccm3/Lpin/CG18659/CG9098/14-3-3zeta/Nf-YB/Uba1/Mnn1/Patronin/ben/spoon/ArfGAP1/Usp47/AMPKalpha/Sur-8/sigmar/dco/mbt/CG34393/Herc4/rdx/Sik3/Lkb1/garz/Pak3/Raf/Usp5/Rlip/raw/jeb/Rheb/p38b/slpr/sgg/P32/CG6180/lig/Clbn/Efa6/pod1/sra/lncRNA:Hsromega/ATPsynD/drk/Nf1/Pdfr/RtGEF/Lamtor1/Prosap/Tao/key/par-1/slmb/vap/crc/wcy/spg/…
GO:BP	regulation of cellular component biogenesis	GO:0044087	156/3338	307/12653	2.31871e-20	3.40155e-18	1.82446e-18	Arpc3A/plum/Kank/mnb/CASK/nwk/baz/tws/Usp7/pico/Cul1/Octbeta2R/atl/SCAR/tmod/futsch/mxt/shi/wde/Synj/svr/Tbce/spoon/ena/dco/Eps-15/sif/chb/Nedd4/C1GalTA/Pak3/dbo/Usp5/Su(var)205/Ulp1/Nsf2/stj/Rheb/Cip4/p38b/Abl/beta-Spec/cal1/sgg/Sdc/Dad/Mob2/stan/Fak/Stat92E/Syn1/Efa6/car/Atx2/Arp2/caz/Nf1/stau/Tao/slmb/gek/Lam/DCP2/LRR/raptor/Arpc5/RhoGAP68F/Smn/cnn/CG31715/msps/Vps16A/Syn2/Tm1/bur/Akt/Arpc2/Rh…
GO:BP	positive regulation of molecular function	GO:0044093	132/3338	247/12653	7.54959e-20	1.05479e-17	5.65746e-18	l(3)80Fj/CG1695/RapGAP1/Dap160/Hk/tbc/Sirup/Evi5/elm/Vav/qvr/Ccm3/scf/Cp1/Dhit/SCCRO/hbs/RhoGAP93B/CG6329/RSG7/CG34393/IKKepsilon/sif/eag/su(f)/fzr/Rlip/Asap/stj/SCCRO4/GAPcenA/Crtc/Cyt-c-p/SERCA/levy/Atx2/CG13344/Axn/Nf1/RtGEF/Eph/Dd/AIMP2/vimar/vap/Atg17/CG5916/fry/spg/raptor/SCCRO3/CG34408/C3G/26-29-p/HtrA2/CG42795/CG5521/RN-tre/RhoGAP1A/Cad96Ca/stol/rl/TBC1D16/CG7369/Stim/Cul3/Mon1/CG8155/CG3…
GO:BP	regulation of localization	GO:0032879	208/3338	454/12653	9.50121e-20	1.26712e-17	6.79632e-18	Teh1/LpR2/mnb/Frq1/Hk/Cnx99A/CASK/prtp/Acsl/TER94/Frq2/sp3/Evi5/elm/dally/CaBP1/gzl/Syt4/qvr/Sec24CD/Pkc53E/FASN1/Khc/lap/Syx7/Tango9/NKAIN/Csp/east/Vps29/prd1/Rab11/enc/CG6329/ArfGAP1/Usp2/drpr/zetaCOP/dco/cindr/Septin4/Herc4/DCTN2-p50/aux/CG5946/rdx/garz/Nedd4/eag/Su(var)205/deltaCOP/Asap/stj/Sec61alpha/Nak/Ih/homer/Abl/sgg/Fkbp59/SERCA/Rop/Graf/SrpRalpha/Syx18/levy/BicD/Parp/gammaCOP/tral/hob/…
GO:BP	localization within membrane	GO:0051668	120/3338	219/12653	2.5683e-19	3.27625e-17	1.75726e-17	Trp1/comt/CG2918/TM9SF2/GABPI/sp3/dally/boca/Sgt/Sec24CD/shi/CG18659/Rab11/X11Lbeta/CG1598/Vps53/Sec61beta/CG31229/EMC8-9/IKKepsilon/dop/EMC1/Herc4/Snx3/Nsf2/Srp19/arm/Sec61alpha/OXA1L/Ttc7/CG7639/SrpRalpha/CG8860/pod1/Tom7/Past1/sau/Lam/fidipidine/RhoGAP68F/Ubc6/nmd/Smn/Vps26/Tom70/Vps35/CG10674/Rab3/Exo84/Rho1/Arl5/Sec23/CG6454/Nrx-1/Sar1/EMC6/Tim9a/Pex19/Sec10/CG1407/Rab35/Vps37B/Hyccin/Flo2/S…
GO:BP	autophagy	GO:0006914	115/3338	208/12653	5.66406e-19	6.64734e-17	3.56538e-17	Ras85D/comt/Atg1/TER94/shrb/CG5026/Arl8/shi/SREBP/SNF4Agamma/Tango5/Synj/Uba1/aus/sima/AMPKalpha/Sec61beta/sigmar/Sod2/lqf/Atg3/Raf/GlyS/scny/stj/Sec61alpha/zda/Rheb/Bruce/EndoA/Pink1/S6k/bchs/Gyf/car/AP-1-2beta/Doa/ref(2)P/Acn/CG5676/Atg17/wcy/rudhira/raptor/Vps28/Ubc6/Vps16A/Atg18b/rl/CG5445/wrd/Blos1/Pp2A-29B/CG8155/Hsc70-5/hep/EMC6/Blos2/Rab18/Atg14/Vps4/Cpsf6/Atg10/Vamp7/Rab3-GAP/CG11975/Vha…
GO:BP	process utilizing autophagic mechanism	GO:0061919	115/3338	208/12653	5.66406e-19	6.64734e-17	3.56538e-17	Ras85D/comt/Atg1/TER94/shrb/CG5026/Arl8/shi/SREBP/SNF4Agamma/Tango5/Synj/Uba1/aus/sima/AMPKalpha/Sec61beta/sigmar/Sod2/lqf/Atg3/Raf/GlyS/scny/stj/Sec61alpha/zda/Rheb/Bruce/EndoA/Pink1/S6k/bchs/Gyf/car/AP-1-2beta/Doa/ref(2)P/Acn/CG5676/Atg17/wcy/rudhira/raptor/Vps28/Ubc6/Vps16A/Atg18b/rl/CG5445/wrd/Blos1/Pp2A-29B/CG8155/Hsc70-5/hep/EMC6/Blos2/Rab18/Atg14/Vps4/Cpsf6/Atg10/Vamp7/Rab3-GAP/CG11975/Vha…
GO:BP	regulation of molecular function	GO:0065009	192/3338	416/12653	9.79667e-19	1.10552e-16	5.92956e-17	l(3)80Fj/CG1695/RapGAP1/Dap160/alc/Hk/tbc/Sirup/Evi5/elm/Vav/blw/qvr/Ccm3/CG6966/scf/SNF4Agamma/Cp1/14-3-3zeta/Dhit/RhoGAP19D/SCCRO/hbs/RhoGAP93B/CG9578/CG6329/RSG7/ArfGAP1/CG34393/IKKepsilon/capt/sif/garz/Nedd4/eag/su(f)/fzr/Nedd8/Rlip/Asap/stj/SCCRO4/GAPcenA/CG14408/Crtc/Wee1/Cyt-c-p/Hexim/sgg/SERCA/ArfGAP3/drongo/levy/Atx2/CG13344/Axn/Nf1/RtGEF/Eph/Dd/AIMP2/vimar/vap/Atg17/CG5916/fry/brun/spg/…
GO:BP	growth	GO:0040007	204/3338	452/12653	1.77828e-18	1.9324e-16	1.03647e-16	plum/mnb/Septin2/Ras85D/Syn/CASK/Actbeta/nwk/baz/CadN/pico/Atg1/TSG101/Octbeta2R/atl/SCAR/Eip63E/Larp4B/dally/futsch/cic/Atpalpha/Hs6st/pnut/shi/fz2/Syx7/alphaSnap/Wbp2/Uba1/SCCRO/sima/ben/Rab11/Tbce/RASSF8/AMPKalpha/drpr/ena/dco/mbt/Eps-15/CadN2/Lkb1/Hcf/eag/Sxl/dbo/Raf/Liprin-alpha/Nsf2/Lk6/arm/stj/jeb/Rheb/Cip4/puf/p38b/slpr/mRpL12/Abl/beta-Spec/sgg/Sdc/Dad/lig/hyd/S6k/Mob2/stan/Fak/bchs/Stat9…
GO:BP	regulation of synapse organization	GO:0050807	98/3338	169/12653	2.77061e-18	2.9032e-16	1.55716e-16	plum/mnb/CASK/nwk/dpr11/Atg1/Octbeta2R/atl/futsch/Rab11/Tbce/drpr/ena/Eps-15/Nedd4/Pak3/dbo/Nsf2/stj/Rheb/Cip4/p38b/Abl/beta-Spec/sgg/Sdc/Dad/ND-20/S6k/Mob2/stan/Fak/bchs/Syn1/Atx2/Arp2/Nlg2/caz/Nf1/RtGEF/stau/Tao/raptor/RhoGAP68F/Smn/Syn2/Akt/Arp3/Nrx-1/wit/Sar1/alpha-Spec/Liprin-gamma/Mad/Fmr1/simj/veli/Fsn/RhoGAP92B/Synd/Src64B/Rae1/Pi3K92E/pum/Ypel/dysc/Sec5/spin/HSPC300/PICK1/SkpA/nmo/Aplip1…
GO:BP	synapse assembly	GO:0007416	102/3338	179/12653	3.1555e-18	3.19249e-16	1.71233e-16	plum/mnb/Syn/CASK/nwk/baz/Atg1/Octbeta2R/atl/Nlg4/futsch/Atpalpha/Arl8/ben/Tbce/ena/Eps-15/Nedd4/Pak3/dbo/Liprin-alpha/Nsf2/stj/jeb/Rheb/Cip4/Abl/beta-Spec/sgg/Sdc/Dad/Nrx-IV/S6k/Mob2/stan/Fak/Syn1/Arp2/Nlg2/caz/Nf1/stau/Prosap/Tao/par-1/raptor/RhoGAP68F/Smn/Syn2/nej/Akt/Arp3/Nrx-1/wit/alpha-Spec/Liprin-gamma/Mad/Fmr1/simj/veli/Fsn/RhoGAP92B/Synd/Src64B/Sema1a/Rae1/Pi3K92E/pum/dysc/spin/HSPC300/S…
GO:BP	neuromuscular junction development	GO:0007528	106/3338	189/12653	3.36621e-18	3.29215e-16	1.76578e-16	DIP-lambda/plum/mnb/Frq1/Syn/CASK/nwk/dpr11/Atg1/Frq2/Octbeta2R/atl/futsch/Atpalpha/ben/Tbce/sff/drpr/ena/Eps-15/Nedd4/C1GalTA/dbo/Liprin-alpha/Nsf2/stj/jeb/Rheb/Vap33/Cip4/Abl/beta-Spec/sgg/Sdc/Dad/S6k/Mob2/Fak/Syx18/Syn1/Arp2/Nlg2/caz/Nf1/stau/Prosap/Tao/par-1/raptor/RhoGAP68F/Smn/Syn2/Mon1/wrd/Akt/Arp3/Nrx-1/wit/alpha-Spec/Liprin-gamma/Mad/Fmr1/simj/veli/Fsn/RhoGAP92B/Synd/Src64B/Rae1/Pi3K92E/…
GO:BP	generation of precursor metabolites and energy	GO:0006091	123/3338	233/12653	5.16104e-18	4.58863e-16	2.46117e-16	Gapdh1/Pfk/Hex-A/SdhA/Ald1/Cyt-c1/Actbeta/ND-B14.5B/CG5214/CG7766/GC1/PyK/Atg1/Sirup/Eno/Chchd2/ND-75/CG14757/blw/FASN1/ND-B14.5A/cype/UQCR-6.4/Pgi/ATPsynbeta/SdhB/Tpi/SdhC/mAcon1/Gapdh2/Mdh1/bsf/GlyP/Gpo1/ND-B22/Idh3b/UGP/ATPsynF/Sik3/Atg3/CG9005/SdhD/GlyS/Ogdh/ScsbetaG/ND-51/CG42376/Idh3a/Cyt-c-p/COX4/UQCR-Q/ND-42/sgg/PhKgamma/Pink1/ND-20/Men/RFeSP/Tspo/levy/Gbs-76A/ND-49/COX5A/Axn/AGBE/dj-1bet…
GO:BP	positive regulation of protein metabolic process	GO:0051247	123/3338	233/12653	5.16104e-18	4.58863e-16	2.46117e-16	Dap160/Actbeta/Cul1/TER94/Larp4B/bnl/mxt/CG4612/Ccm3/UbcE2H/CG9098/Cp1/Xbp1/SCCRO/Pabp2/ari-1/hbs/spoon/Usp2/dco/IKKepsilon/dod/Mkrn1/rdx/Dp1/Nedd4/fzr/Usp5/EloB/sordd1/Lk6/scny/Rheb/SCCRO4/p38b/Cyt-c-p/sgg/Mob2/orb2/lncRNA:Hsromega/Axn/pic/La/slmb/Ufd1/Atg17/Ndfip/fry/raptor/SCCRO3/26-29-p/Ubc6/HtrA2/senju/RabX1/Socs36E/Cul3/poe/Lon/CG13404/Rho1/ebi/pen-2/ScsbetaA/CG8405/mmy/Fmr1/Apc/larp/sip3/R…
GO:BP	endomembrane system organization	GO:0010256	116/3338	215/12653	5.10252e-18	4.58863e-16	2.46117e-16	EndoB/Msp300/comt/TER94/TSG101/atl/Marf/scramb1/Sec24CD/Ccm3/shi/Lpin/Use1/alphaSnap/Tango5/ReepA/ari-1/prd1/Cog1/Surf4/mbt/EMC8-9/dop/EMC1/garz/bai/nes/Asap/Vap33/Cip4/fwd/GM130/beta-Spec/AP-1gamma/EndoA/car/tral/Nlg2/p24-1/sau/ref(2)P/wol/Dd/Grasp65/lsn/Lam/opm/Vps28/Osbp/cnn/Hs3st-B/msps/Bet1/CG10674/RhoGAP1A/Rab3/Cad96Ca/Sec22/RabX1/Sec23/CG33298/Arp3/Ire1/Sar1/alpha-Spec/Golgin84/EMC6/Rab35/…
GO:BP	protein modification by small protein conjugation or removal	GO:0070647	153/3338	313/12653	5.86726e-18	4.98393e-16	2.67319e-16	Ubc2/Usp7/HUWE1/Cul1/CSN7/CG11658/gzl/CG1317/gcl/UbcE2H/Uba1/SCCRO/ari-1/ben/Usp2/Usp47/Iru/dod/Mkrn1/Herc4/CG1812/CG7332/rdx/CG10254/Nedd4/dbo/fzr/Usp5/not/Ulp1/Nedd8/Ufl1/sordd1/scny/bon/SCCRO4/puf/CG11700/Bruce/CG7222/msl-2/hyd/CG6325/bchs/Den1/Bre1/Ubr3/alien/car/Cnot4/CG13344/pic/Duba/DUBAI/slmb/CG4238/Uch/wcy/Ndfip/Usp30/Usp32/SCCRO3/Ubc6/CG4080/KLHL18/sordd2/Cul3/CG17059/Ufc1/Usp15-31/Ube4…
GO:BP	secretion by cell	GO:0032940	119/3338	223/12653	5.94538e-18	4.98393e-16	2.67319e-16	Frq1/Syn/CASK/comt/tbc/Frq2/ALiX/gammaSnap1/Syt4/Arl8/Sec24CD/shi/Use1/alphaSnap/Tango9/Syx13/Tango5/Tpst/Csp/Scamp/Rab11/Bet3/dco/Septin4/garz/Madm/deltaCOP/Nsf2/Vps45/cm/Vap33/Ih/Rop/SrpRalpha/BicD/gammaCOP/Doa/gry/hob/NFAT/gammaSnap2/nSyb/AdipoR/CG5021/CanB2/Fam92/Vps35/Rab3/Exo84/Syx6/Amph/Syx5/nej/Akt/Sec23/DCAF12/Tango11/Sar1/Rep/Sec10/Rab35/Flo2/veli/S/RhoGAP92B/Vamp7/Rab3-GAP/HDAC6/Gdi/ro…
GO:BP	synaptic assembly at neuromuscular junction	GO:0051124	88/3338	147/12653	9.00508e-18	7.33914e-16	3.93643e-16	plum/mnb/Syn/CASK/nwk/Atg1/Octbeta2R/atl/futsch/Atpalpha/ben/Tbce/ena/Eps-15/dbo/Liprin-alpha/Nsf2/stj/jeb/Rheb/Cip4/Abl/beta-Spec/sgg/Sdc/Dad/S6k/Mob2/Fak/Syn1/Arp2/Nlg2/caz/Nf1/stau/Prosap/Tao/par-1/raptor/RhoGAP68F/Smn/Syn2/Akt/Arp3/Nrx-1/wit/alpha-Spec/Liprin-gamma/Mad/Fmr1/simj/veli/Fsn/RhoGAP92B/Synd/Src64B/Rae1/Pi3K92E/pum/dysc/spin/HSPC300/SkpA/nmo/LIMK1/cpx/Cul2/BOD1/Arfip/Pdk1/kis/Rab8/…
GO:BP	endosomal transport	GO:0016197	75/3338	117/12653	9.7651e-18	7.74346e-16	4.15329e-16	Dap160/CG2747/sp3/shrb/gzl/shi/CG18659/lap/Synj/Vps29/Rab11/Vps53/IKKepsilon/Vta1/Eps-15/Snx3/Mvb12/EndoA/CG30423/Sara/car/Stam/Reps/Past1/Lamtor1/lsn/Vps28/RhoGAP68F/Ubc6/Vps26/Vps35/Vps16A/Exo84/Syx6/CG4074/Mon1/Blos1/CHMP2B/Ist1/Rho1/Arl5/Blos2/ATP6AP2/Snx6/SIDL/Rab35/Vps20/Vps4/S/CG32576/ema/CG15012/Sec5/Vps52/Rab5/cert/Sbf/Syt1/Rab6/Vps50/Rab7/mop/Hrs/Tor/CG1116/mtm/Sec6/l(2)gd1/Vps8/Sec15/S…
GO:BP	regulation of catalytic activity	GO:0050790	157/3338	327/12653	1.79836e-17	1.35292e-15	7.25653e-16	l(3)80Fj/CG1695/RapGAP1/Dap160/alc/tbc/Sirup/Evi5/Vav/blw/Ccm3/CG6966/scf/SNF4Agamma/Cp1/Dhit/RhoGAP19D/SCCRO/hbs/RhoGAP93B/CG9578/RSG7/ArfGAP1/CG34393/IKKepsilon/capt/sif/garz/su(f)/fzr/Nedd8/Rlip/Asap/SCCRO4/GAPcenA/CG14408/Wee1/Cyt-c-p/Hexim/sgg/ArfGAP3/drongo/levy/Axn/Nf1/RtGEF/Eph/Dd/AIMP2/vimar/vap/Atg17/CG5916/fry/brun/spg/raptor/SCCRO3/CG34408/C3G/26-29-p/HtrA2/CG42795/CG5521/RN-tre/RhoGA…
GO:BP	trans-synaptic signaling	GO:0099537	157/3338	327/12653	1.79836e-17	1.35292e-15	7.25653e-16	nAChRalpha3/Sap47/Cbp53E/Nmdar1/Frq1/nAChRalpha2/Syn/CASK/comt/nwk/Acsl/Atg1/Frq2/scramb1/gammaSnap1/Nlg4/Syt4/5-HT7/Atpalpha/qvr/Arl8/shi/lap/alphaSnap/kcc/Syx13/Csp/Scamp/Tbce/CG6329/X11Lbeta/Ipp/Sod2/Srpk79D/stas/Cat/Nsf2/Vps45/nAChRalpha4/stj/jeb/Vap33/kek6/eIF4E1/Ih/Abl/beta-Spec/SERCA/P32/Rop/Pink1/Syx18/BicD/Nmnat/cdm/Nlg2/5-HT2A/NFAT/dj-1beta/Pgk/gammaSnap2/nSyb/na/Smn/CanB2/Rab3/Exo84/rl…
GO:BP	mitochondrion organization	GO:0007005	134/3338	265/12653	1.98246e-17	1.45414e-15	7.79943e-16	ND-B14.7/ND-B14.5B/QIL1/Marf/Sirup/Sdhaf3/Chchd2/CG14757/CG14483/Khc/SREBP/Mic26-27/Tango9/prel/spoon/l(2)k14505/CG14130/Scox/UQCR-C1/Taz/CG7772/CG31229/Sod2/ND-B22/milt/ND-B18/ND-ACP/CG10340/Atg3/CG11779/CG11722/CG7382/Roe1/mRpL12/OXA1L/CG7639/Pink1/ND-20/Stoml2/Mitofilin/CG13392/Hsp60A/sra/Tom7/ND-SGDH/Tim23/CG3262/ND-B15/Chchd3/ref(2)P/CLS/CG9231/rho-7/vimar/CG11562/CG7394/clu/CG5676/ND-18/Atg…
GO:BP	chemical synaptic transmission	GO:0007268	156/3338	325/12653	2.35198e-17	1.62391e-15	8.71003e-16	nAChRalpha3/Sap47/Cbp53E/Nmdar1/Frq1/nAChRalpha2/Syn/CASK/comt/nwk/Acsl/Atg1/Frq2/scramb1/gammaSnap1/Nlg4/Syt4/5-HT7/Atpalpha/qvr/Arl8/shi/lap/alphaSnap/kcc/Syx13/Csp/Scamp/Tbce/CG6329/X11Lbeta/Ipp/Sod2/Srpk79D/stas/Cat/Nsf2/Vps45/nAChRalpha4/stj/jeb/Vap33/kek6/eIF4E1/Ih/Abl/beta-Spec/SERCA/P32/Rop/Pink1/Syx18/BicD/Nmnat/cdm/Nlg2/5-HT2A/NFAT/dj-1beta/Pgk/gammaSnap2/nSyb/na/Smn/CanB2/Rab3/Exo84/rl…
GO:BP	anterograde trans-synaptic signaling	GO:0098916	156/3338	325/12653	2.35198e-17	1.62391e-15	8.71003e-16	nAChRalpha3/Sap47/Cbp53E/Nmdar1/Frq1/nAChRalpha2/Syn/CASK/comt/nwk/Acsl/Atg1/Frq2/scramb1/gammaSnap1/Nlg4/Syt4/5-HT7/Atpalpha/qvr/Arl8/shi/lap/alphaSnap/kcc/Syx13/Csp/Scamp/Tbce/CG6329/X11Lbeta/Ipp/Sod2/Srpk79D/stas/Cat/Nsf2/Vps45/nAChRalpha4/stj/jeb/Vap33/kek6/eIF4E1/Ih/Abl/beta-Spec/SERCA/P32/Rop/Pink1/Syx18/BicD/Nmnat/cdm/Nlg2/5-HT2A/NFAT/dj-1beta/Pgk/gammaSnap2/nSyb/na/Smn/CanB2/Rab3/Exo84/rl…
GO:BP	membrane organization	GO:0061024	145/3338	295/12653	2.37996e-17	1.62391e-15	8.71003e-16	EndoB/comt/nwk/QIL1/TER94/atl/scramb1/shrb/Nlg4/Syt4/Arl8/Sec24CD/shi/Lpin/lap/Syx7/Mic26-27/alphaSnap/Tango9/CG31729/Syx13/aus/prd1/Rab11/CG1902/CG14130/Taz/drpr/CG31229/EMC8-9/ATP8A/EMC1/Vps45/nes/Asap/Vap33/Cip4/OXA1L/beta-Spec/EndoA/Nrx-IV/CG7639/ArfGAP3/Graf/Mitofilin/car/pod1/Tom7/Nlg2/sau/Chchd3/CLS/wol/Dd/Lam/nSyb/Sec24AB/Smn/Bet1/Tom70/CG10674/Vps16A/Rab3/Sec22/RabX1/Syx6/CG3149/Blos1/Sy…
GO:BP	regulation of cellular catabolic process	GO:0031329	139/3338	279/12653	2.55587e-17	1.7043e-15	9.14121e-16	Ras85D/Actbeta/Cul1/Atg1/TER94/CG5026/Dora/shi/UbcE2H/Pop2/SREBP/Synj/Pabp2/ari-1/sima/Usp47/AMPKalpha/bsf/Sec61beta/Rga/sigmar/Sod2/GlyP/dco/Sik3/Lkb1/Not1/Raf/fzr/Usp5/Ufl1/EloB/sordd1/GlyS/scny/Sec61alpha/Rheb/Bruce/sgg/Pink1/S6k/Gyf/AP-1-2beta/Doa/Axn/Acn/slmb/Ufd1/wcy/DCP2/raptor/Ubc6/CG2124/twin/PAN2/rl/poe/CG13850/Ythdf/CG8155/Akt/hep/ebi/Ge-1/CG8209/chico/Atg14/Fmr1/sip3/Rnf146/Cpsf6/CSN5…
GO:BP	regulation of transport	GO:0051049	158/3338	332/12653	3.97486e-17	2.48133e-15	1.33089e-15	Teh1/LpR2/mnb/Frq1/Hk/Cnx99A/CASK/prtp/Frq2/sp3/elm/CaBP1/gzl/Syt4/qvr/Sec24CD/Pkc53E/lap/Syx7/Tango9/NKAIN/Csp/Vps29/Rab11/CG6329/ArfGAP1/Usp2/drpr/dco/cindr/Septin4/DCTN2-p50/aux/rdx/garz/Nedd4/eag/stj/Sec61alpha/Nak/Ih/homer/Abl/sgg/Fkbp59/SERCA/Graf/SrpRalpha/Syx18/levy/BicD/tral/hob/Tom7/drk/Tao/Npc1a/NFAT/Mvl/vap/Klp64D/Fur2/nSyb/RhoGAP68F/AdipoR/Orai/Fam92/Vps35/tweek/Rab3/Wnk/stol/swm/PGA…
GO:BP	cell junction assembly	GO:0034329	122/3338	235/12653	3.96918e-17	2.48133e-15	1.33089e-15	plum/mnb/Syn/CASK/loco/nwk/baz/Atg1/Octbeta2R/atl/Nlg4/futsch/Atpalpha/Arl8/ben/Tbce/ena/Eps-15/cindr/kirre/Nedd4/Pak3/dbo/Liprin-alpha/Nsf2/arm/stj/jeb/Rheb/Cip4/Abl/beta-Spec/sgg/Sdc/Dad/Nrx-IV/S6k/wun/Mob2/stan/Fak/Syn1/Arp2/Nlg2/caz/Nf1/stau/Prosap/Tao/par-1/wol/raptor/RhoGAP68F/Mcr/Smn/Syn2/nej/Akt/Arp3/Nrx-1/wit/alpha-Spec/Liprin-gamma/Mad/Fmr1/simj/veli/Fsn/RhoGAP92B/Synd/Cont/Src64B/Sema1…
GO:BP	regulation of synapse structure or activity	GO:0050803	110/3338	204/12653	3.9545e-17	2.48133e-15	1.33089e-15	plum/mnb/CASK/Actbeta/nwk/dpr11/Atg1/Octbeta2R/atl/futsch/shi/Synj/Khc-73/Rab11/Tbce/drpr/ena/Eps-15/sif/Nedd4/Pak3/dbo/Nsf2/stj/Rheb/Cip4/p38b/Abl/beta-Spec/sgg/EndoA/Sdc/Dad/ND-20/S6k/Mob2/stan/Fak/bchs/Syn1/Atx2/Arp2/Nlg2/caz/Nf1/RtGEF/stau/Tao/raptor/RhoGAP68F/Smn/Syn2/Akt/Arp3/Nrx-1/wit/Sar1/alpha-Spec/Liprin-gamma/Dg/Mad/Fmr1/simj/veli/Fsn/RhoGAP92B/Rab3-GAP/Synd/Src64B/Rae1/Pi3K92E/pum/Ype…
GO:BP	synaptic signaling	GO:0099536	159/3338	335/12653	4.31008e-17	2.63454e-15	1.41306e-15	nAChRalpha3/Sap47/Cbp53E/Nmdar1/Frq1/nAChRalpha2/Syn/CASK/comt/nwk/Acsl/Atg1/Frq2/scramb1/gammaSnap1/Nlg4/Syt4/5-HT7/Atpalpha/qvr/Arl8/shi/lap/alphaSnap/kcc/Syx13/Csp/Scamp/Tbce/CG6329/X11Lbeta/Ipp/Sod2/Srpk79D/stas/Cat/Nsf2/Vps45/nAChRalpha4/stj/jeb/Vap33/kek6/eIF4E1/Ih/Abl/beta-Spec/SERCA/P32/Rop/Pink1/Syx18/BicD/Nmnat/cdm/Nlg2/5-HT2A/NFAT/dj-1beta/Pgk/gammaSnap2/nSyb/na/Smn/CanB2/Rab3/Exo84/rl…
GO:BP	export from cell	GO:0140352	121/3338	233/12653	5.18281e-17	3.10334e-15	1.66451e-15	Frq1/Syn/CASK/comt/tbc/Frq2/ALiX/gammaSnap1/Syt4/Atpalpha/Arl8/Sec24CD/shi/Use1/alphaSnap/Tango9/Syx13/Tango5/Tpst/Csp/Scamp/Rab11/nrv3/Bet3/dco/Septin4/garz/Madm/deltaCOP/Nsf2/Vps45/cm/Vap33/Ih/Rop/SrpRalpha/BicD/gammaCOP/Doa/gry/hob/NFAT/gammaSnap2/nSyb/AdipoR/CG5021/CanB2/Fam92/Vps35/Rab3/Exo84/Syx6/Amph/Syx5/nej/Akt/Sec23/DCAF12/Tango11/Sar1/Rep/Sec10/Rab35/Flo2/veli/S/RhoGAP92B/Vamp7/Rab3-GA…
GO:BP	positive regulation of catalytic activity	GO:0043085	107/3338	198/12653	8.66282e-17	5.08334e-15	2.72651e-15	l(3)80Fj/CG1695/RapGAP1/Dap160/tbc/Sirup/Evi5/Vav/Ccm3/scf/Cp1/Dhit/SCCRO/hbs/RhoGAP93B/RSG7/CG34393/IKKepsilon/sif/su(f)/fzr/Rlip/Asap/SCCRO4/GAPcenA/Cyt-c-p/levy/Axn/Nf1/RtGEF/Eph/Dd/AIMP2/vimar/vap/Atg17/CG5916/fry/spg/raptor/SCCRO3/CG34408/C3G/26-29-p/HtrA2/CG42795/CG5521/RN-tre/RhoGAP1A/Cad96Ca/TBC1D16/CG7369/Cul3/Mon1/CG8155/CG3703/Rho1/Sec23/Ziz/Ret/Tbc1d8-9/CenG1A/pen-2/ScsbetaA/PolZ2/Atg…
GO:BP	developmental growth	GO:0048589	175/3338	384/12653	1.6612e-16	9.55676e-15	5.12588e-15	plum/mnb/Septin2/Ras85D/Syn/CASK/Actbeta/nwk/baz/CadN/pico/Atg1/TSG101/Octbeta2R/atl/SCAR/Eip63E/dally/futsch/cic/Atpalpha/Hs6st/pnut/fz2/Syx7/alphaSnap/Wbp2/ben/Rab11/Tbce/RASSF8/ena/dco/mbt/Eps-15/CadN2/eag/Sxl/dbo/Raf/Liprin-alpha/Nsf2/arm/stj/jeb/Rheb/Cip4/p38b/slpr/Abl/beta-Spec/sgg/Sdc/Dad/lig/hyd/S6k/Mob2/stan/Fak/bchs/Stat92E/Syn1/Arp2/Nlg2/caz/Nf1/RtGEF/Sema2a/stau/Prosap/Tao/par-1/dj-1b…
GO:BP	regulation of growth	GO:0040008	151/3338	317/12653	1.82126e-16	1.02761e-14	5.51169e-15	plum/mnb/Ras85D/CASK/Actbeta/nwk/CadN/pico/Atg1/TSG101/Octbeta2R/atl/Larp4B/dally/futsch/cic/Hs6st/pnut/shi/Syx7/Wbp2/Uba1/SCCRO/sima/Tbce/RASSF8/AMPKalpha/drpr/ena/dco/mbt/Eps-15/Lkb1/Hcf/dbo/Raf/Liprin-alpha/Nsf2/Lk6/stj/Rheb/Cip4/puf/p38b/mRpL12/Abl/beta-Spec/sgg/Sdc/Dad/lig/S6k/Mob2/stan/Fak/bchs/Syn1/pix/Arp2/caz/Nf1/RtGEF/Sema2a/stau/Tao/dj-1beta/raptor/SCCRO3/RhoGAP68F/Smn/CG9328/Syn2/Ythd…
GO:BP	secretion	GO:0046903	122/3338	239/12653	2.1758e-16	1.20449e-14	6.46041e-15	Frq1/Syn/CASK/comt/tbc/Frq2/ALiX/gammaSnap1/Syt4/Arl8/Sec24CD/shi/Use1/alphaSnap/Tango9/Syx13/Tango5/Tpst/Csp/Scamp/Rab11/Bet3/dco/Septin4/garz/Madm/deltaCOP/Nsf2/Vps45/cm/Vap33/Ih/Rop/SrpRalpha/BicD/gammaCOP/Doa/gry/hob/NFAT/gammaSnap2/Fur2/nSyb/AdipoR/CG5021/CanB2/Fam92/Vps35/Rab3/Exo84/Syx6/Amph/Syx5/nej/Akt/Sec23/DCAF12/Tango11/Sar1/Rep/Sec10/Rab35/Flo2/veli/S/RhoGAP92B/Vamp7/Rab3-GAP/HDAC6/G…
GO:BP	positive regulation of cell communication	GO:0010647	199/3338	456/12653	3.86131e-16	2.09798e-14	1.12527e-14	Cbp53E/Ras85D/Actbeta/tws/Usp7/ALiX/flw/Eip63E/siz/dally/Vav/Ccm3/Lpin/CG9098/Cp1/14-3-3zeta/Nf-YB/Mnn1/sno/ben/hbs/Usp47/Sur-8/sigmar/dco/CG34393/lqf/Mkrn1/stas/Herc4/aux/Ssdp/rdx/Sxl/Raf/Dyrk2/jeb/Rheb/slpr/Nak/beta-Spec/lig/Pink1/hyd/Kap3/Clbn/Ubr3/Efa6/BicD/Parp/pod1/lncRNA:Hsromega/Doa/Cnot4/drk/Pdfr/RtGEF/Lamtor1/Tnpo/Tao/slmb/sxc/crc/Klp64D/Nulp1/wcy/Ndfip/spg/C3G/na/Leash/26-29-p/AdipoR/S…
GO:BP	positive regulation of signaling	GO:0023056	198/3338	454/12653	4.9841e-16	2.65879e-14	1.42607e-14	Cbp53E/Ras85D/Actbeta/tws/Usp7/ALiX/flw/Eip63E/siz/dally/Vav/Ccm3/Lpin/CG9098/Cp1/14-3-3zeta/Nf-YB/Mnn1/sno/ben/hbs/Usp47/Sur-8/sigmar/dco/CG34393/lqf/Mkrn1/stas/Herc4/aux/Ssdp/rdx/Sxl/Raf/Dyrk2/jeb/Rheb/slpr/Nak/beta-Spec/lig/hyd/Kap3/Clbn/Ubr3/Efa6/BicD/Parp/pod1/lncRNA:Hsromega/Doa/Cnot4/drk/Pdfr/RtGEF/Lamtor1/Tnpo/Tao/slmb/sxc/crc/Klp64D/Nulp1/wcy/Ndfip/spg/C3G/na/Leash/26-29-p/AdipoR/Smn/Ora…
GO:BP	protein localization to organelle	GO:0033365	137/3338	282/12653	6.26098e-16	3.28031e-14	1.75943e-14	Trp1/Ripalpha/hth/CG2918/Sgt/KdelR/UQCR-C1/CG1598/Sec61beta/CG31229/Spase22-23/EMC8-9/Pex13/EMC1/rdx/Su(var)205/CG11779/Srp19/INPP5E/Sec61alpha/CG7382/Roe1/OXA1L/cal1/sgg/CG7639/Pink1/SrpRalpha/Spase25/Ntf-2/CG8860/car/Hsp60A/Stam/BicD/Parp/cdm/Tom7/Tim23/Tnpo/Naus/CG7394/Klp64D/lsn/CG13887/Lam/Vps28/Tom40/Tom70/CG10286/Ran/CG10674/msk/Dhc64C/Mon1/ktub/Hsc70-5/Arl5/CG14894/Rep/EMC6/Tim9a/Pex19/Vp…
GO:BP	protein localization to membrane	GO:0072657	99/3338	182/12653	6.95169e-16	3.57829e-14	1.91926e-14	Trp1/comt/CG2918/TM9SF2/GABPI/dally/boca/Sgt/Sec24CD/shi/Rab11/X11Lbeta/CG1598/Sec61beta/CG31229/EMC8-9/dop/EMC1/Herc4/Nsf2/Srp19/arm/Sec61alpha/OXA1L/Ttc7/CG7639/SrpRalpha/CG8860/pod1/Tom7/Past1/sau/nmd/Smn/Vps26/Tom70/Vps35/CG10674/Rab3/Exo84/Arl5/Sec23/CG6454/Nrx-1/Sar1/EMC6/Tim9a/Pex19/CG1407/Rab35/Vps37B/Hyccin/Flo2/Srp14/Srp9/Srp68/veli/Tim8/Srp72/Dnz1/Srp54k/Arfrp1/Sec71/wls/Rab3GAP1/Sec5/…
GO:BP	energy derivation by oxidation of organic compounds	GO:0015980	98/3338	181/12653	1.46169e-15	7.39412e-14	3.96592e-14	SdhA/Cyt-c1/Actbeta/ND-B14.5B/CG5214/CG7766/GC1/Atg1/Sirup/Chchd2/ND-75/CG14757/FASN1/ND-B14.5A/cype/UQCR-6.4/ATPsynbeta/SdhB/SdhC/mAcon1/Mdh1/bsf/GlyP/Gpo1/ND-B22/Idh3b/UGP/ATPsynF/Atg3/CG9005/SdhD/GlyS/Ogdh/ScsbetaG/ND-51/CG42376/Idh3a/Cyt-c-p/COX4/UQCR-Q/ND-42/sgg/PhKgamma/Pink1/ND-20/RFeSP/Tspo/levy/Gbs-76A/ND-49/COX5A/Axn/AGBE/dj-1beta/ND-13B/Atg17/ND-B17.2/CG34150/Nipsnap/sun/Rim2/ND-B17/CG…
GO:BP	tissue morphogenesis	GO:0048729	166/3338	366/12653	1.75642e-15	8.73449e-14	4.68484e-14	sli/Ras85D/Vha26/loco/baz/CadN/orb/TSG101/CSN7/flw/Eip63E/ths/Sac1/hdc/bnl/Vav/fred/zip/shi/rin/Rab11/hbs/spoon/Dp/Ptp10D/ct/ena/aop/trh/CCT3/dco/CadN2/Lkb1/Raf/raw/Nsf2/arm/Sec61alpha/jeb/Rheb/Cip4/slpr/dmt/kuk/Abl/sds22/Dad/Nrx-IV/lig/Ptp4E/mam/stan/alien/Parp/gammaCOP/VhaAC39-1/Drak/Pcyt1/par-1/wol/slmb/Grasp65/Lam/Frl/kmr/noc/Mcr/msk/rl/Dhc64C/kkv/nej/Akt/Rho1/hep/sfl/Pkn/ATP6AP2/Dsor1/CSN6/D…
GO:BP	regulation of synapse assembly	GO:0051963	75/3338	125/12653	2.00732e-15	9.8158e-14	5.26482e-14	plum/mnb/CASK/nwk/Octbeta2R/atl/futsch/Tbce/ena/Eps-15/Nedd4/Pak3/dbo/Nsf2/stj/Rheb/Cip4/Abl/beta-Spec/sgg/Sdc/Dad/Mob2/stan/Fak/Syn1/Arp2/caz/Nf1/stau/Tao/raptor/RhoGAP68F/Smn/Syn2/Akt/Arp3/wit/alpha-Spec/Liprin-gamma/Mad/Fmr1/simj/veli/Fsn/RhoGAP92B/Synd/Src64B/Rae1/Pi3K92E/pum/dysc/spin/HSPC300/SkpA/nmo/Cul2/Arfip/kis/Rab8/tkv/cpb/Patr-1/TBPH/Tor/Rac1/PIP5K59B/hiw/Spn/brat/spas/Syp/Cdc42/Sec8/…
GO:BP	regulation of cell junction assembly	GO:1901888	76/3338	128/12653	2.92924e-15	1.40891e-13	7.55687e-14	plum/mnb/CASK/nwk/Octbeta2R/atl/futsch/Tbce/ena/Eps-15/Nedd4/Pak3/dbo/Nsf2/stj/Rheb/Cip4/Abl/beta-Spec/sgg/Sdc/Dad/Mob2/stan/Fak/Syn1/Arp2/caz/Nf1/stau/Tao/raptor/RhoGAP68F/Smn/Syn2/Akt/Arp3/wit/alpha-Spec/Liprin-gamma/Mad/Fmr1/simj/veli/Fsn/RhoGAP92B/Synd/Src64B/Rae1/Pi3K92E/pum/dysc/spin/HSPC300/SkpA/nmo/Cul2/Arfip/kis/Rab8/tkv/cpb/Patr-1/TBPH/Tor/Rac1/PIP5K59B/Pten/hiw/Spn/brat/spas/Syp/Cdc42/…
GO:BP	negative regulation of signaling	GO:0023057	180/3338	410/12653	5.25891e-15	2.48865e-13	1.33482e-13	RapGAP1/Dap160/mnb/Ras85D/Usp7/HUWE1/Cul1/CG2918/Atg1/TER94/flw/PPP4R2r/TM9SF2/dally/Sac1/Vav/Lpin/gcl/Tango9/Npl4/Synj/Mnn1/anchor/Patronin/Usp2/Ptp10D/AMPKalpha/aop/dco/Eps-15/Herc4/hang/rdx/Sik3/Nedd4/Raf/Usp5/Ulp1/Nedd8/raw/EloB/scny/jeb/Rheb/puf/p38b/CG14182/sgg/Dad/CG6180/lig/Graf/Ptp4E/Fak/Nmnat/Xxylt/gro/Axn/ATPsynD/Nlg2/pic/Duba/Prosap/Tao/par-1/Dd/slmb/vap/Ufd1/Ndfip/LRR/Ubc6/cv/senju/S…
GO:BP	regulation of organelle organization	GO:0033043	157/3338	345/12653	7.29126e-15	3.39564e-13	1.82129e-13	Arpc3A/Kank/nwk/tws/Usp7/QIL1/Cul1/atl/Marf/SCAR/tmod/futsch/Vav/Syt4/Ccm3/shi/wde/SREBP/Tango9/Synj/svr/Patronin/Cdc27/spoon/ena/sigmar/Sod2/dco/IKKepsilon/chb/Nedd4/fzr/Su(var)205/Ulp1/Asap/Cip4/p38b/mRpL12/ZAP3/Abl/beta-Spec/cal1/sgg/Pink1/Stat92E/Efa6/BicD/Atx2/stau/Naus/CG9231/slmb/vimar/gek/Lam/DCP2/nSyb/LRR/Arpc5/RhoGAP68F/cnn/CG31715/msps/Rab3/Dhc64C/bur/CG8155/nej/Arpc2/Rho1/Sec23/CG3168…
GO:BP	actin cytoskeleton organization	GO:0030036	146/3338	317/12653	1.95956e-14	8.98334e-13	4.81832e-13	Arpc3A/RhoGEF3/Kank/loco/Msp300/nwk/capu/pico/CG43901/ALiX/flw/SCAR/tmod/siz/blow/Vav/zip/shi/Khc/CG42673/svr/Rab11/spoon/ena/dco/IKKepsilon/capt/cindr/sif/Nedd4/Pak3/SelR/Cip4/fwd/p38b/gukh/Abl/Hip1/beta-Spec/Graf/cib/pod1/Actn/Atx2/hts/tral/Arp2/sau/Naus/gek/CG33521/Lam/DCP2/brun/Frl/LRR/Arpc5/C3G/RhoGAP68F/Smn/CG31715/CanB2/CG5022/Exo84/Tm1/ghi/Arpc2/Rho1/Myo95E/Ret/hep/Arp3/Ssrp/alpha-Spec/Ps…
GO:BP	negative regulation of cell communication	GO:0010648	179/3338	412/12653	2.06303e-14	9.31221e-13	4.99471e-13	RapGAP1/Dap160/mnb/Ras85D/Usp7/HUWE1/Cul1/CG2918/Atg1/TER94/flw/PPP4R2r/TM9SF2/dally/Sac1/Vav/Lpin/gcl/Tango9/Npl4/Synj/Mnn1/anchor/Patronin/Usp2/Ptp10D/AMPKalpha/aop/dco/Eps-15/Herc4/hang/rdx/Sik3/Nedd4/Raf/Usp5/Ulp1/Nedd8/raw/EloB/scny/jeb/Rheb/puf/p38b/CG14182/sgg/Dad/CG6180/lig/Graf/Ptp4E/Nmnat/Xxylt/gro/Axn/ATPsynD/Nlg2/pic/Duba/Prosap/Tao/par-1/Dd/slmb/vap/Ufd1/Ndfip/LRR/Ubc6/cv/senju/Socs3…
GO:BP	regulation of synaptic assembly at neuromuscular junction	GO:0008582	70/3338	117/12653	2.12574e-14	9.44987e-13	5.06854e-13	plum/mnb/CASK/nwk/Octbeta2R/atl/futsch/Tbce/ena/Eps-15/dbo/Nsf2/stj/Rheb/Cip4/Abl/beta-Spec/sgg/Sdc/Dad/Mob2/Fak/Syn1/Arp2/caz/Nf1/stau/Tao/raptor/RhoGAP68F/Smn/Syn2/Akt/Arp3/wit/alpha-Spec/Liprin-gamma/Mad/Fmr1/simj/veli/Fsn/RhoGAP92B/Synd/Src64B/Rae1/Pi3K92E/pum/dysc/spin/HSPC300/SkpA/nmo/Cul2/Arfip/kis/Rab8/tkv/cpb/Patr-1/TBPH/Tor/PIP5K59B/hiw/brat/spas/Syp/Cdc42/Sec8/Strip
GO:BP	organelle localization	GO:0051640	116/3338	235/12653	2.65103e-14	1.16091e-12	6.2267e-13	CASK/Msp300/baz/ALiX/flw/Marf/Arl8/shi/Khc/lap/Syx7/Syx13/east/Khc-73/prd1/Rab11/Ns3/AGO2/milt/dop/DCTN2-p50/chb/Rilpl/deltaCOP/Liprin-alpha/nudC/ens/Vap33/CG10681/nudE/ArfGAP3/Rop/Pink1/bchs/pix/BicD/gammaCOP/emb/Nmd3/clu/Lam/nSyb/CG11123/msps/Ran/Rab3/Exo84/Rim2/Syx6/Dhc64C/wrd/Blos1/Syx5/Sec23/Myo95E/Sar1/Blos2/Arp10/LTV1/Sec10/Mad1/Rab35/Fmr1/larp/CG10362/koi/Nnf1a/Top2/Eb1/CG32409/ric8a/Sec5…
GO:BP	positive regulation of signal transduction	GO:0009967	181/3338	419/12653	2.816e-14	1.21502e-12	6.5169e-13	Ras85D/Actbeta/tws/Usp7/ALiX/flw/Eip63E/siz/dally/Vav/Ccm3/Lpin/CG9098/Cp1/14-3-3zeta/Nf-YB/Mnn1/sno/ben/hbs/Usp47/Sur-8/sigmar/dco/CG34393/lqf/Mkrn1/Herc4/aux/Ssdp/rdx/Sxl/Raf/Dyrk2/jeb/Rheb/slpr/Nak/lig/hyd/Kap3/Clbn/Ubr3/Efa6/Parp/pod1/lncRNA:Hsromega/Doa/Cnot4/drk/Pdfr/RtGEF/Lamtor1/Tnpo/Tao/slmb/sxc/crc/Klp64D/Nulp1/wcy/Ndfip/spg/C3G/Leash/26-29-p/Orai/Vps35/RhoGAP1A/Sirt1/sun/cv/Cad96Ca/Wnk…
GO:BP	establishment or maintenance of cell polarity	GO:0007163	102/3338	198/12653	2.97253e-14	1.26397e-12	6.77945e-13	alc/Ras85D/loco/baz/tws/CadN/orb/TSG101/Sec24CD/Khc/Syx7/14-3-3zeta/rin/Khc-73/Rab11/hbs/spoon/sff/Dp/AMPKalpha/aop/capt/DCTN2-p50/CadN2/chb/Lkb1/Raf/sds22/nudE/sgg/lig/Kap3/stan/BicD/Parp/Pcyt1/par-1/slmb/Klp64D/Frl/msps/Ran/Exo84/msk/Dhc64C/nej/Rho1/Sec23/Dg/p130CAS/Apc/Vps4/Vang/yrt/veli/S/Eb1/Cont/Dys/Cbl/csw/ric8a/spn-F/Klp68D/Moe/Klp10A/btz/fy/Rab5/nmo/RhoBTB/mgr/Ggamma1/dsh/sano/Rab6/aPKC/…
GO:BP	regulation of neuromuscular junction development	GO:1904396	72/3338	123/12653	4.38031e-14	1.83597e-12	9.84746e-13	plum/mnb/CASK/nwk/dpr11/Octbeta2R/atl/futsch/Tbce/drpr/ena/Eps-15/dbo/Nsf2/stj/Rheb/Cip4/Abl/beta-Spec/sgg/Sdc/Dad/Mob2/Fak/Syn1/Arp2/caz/Nf1/stau/Tao/raptor/RhoGAP68F/Smn/Syn2/Akt/Arp3/wit/alpha-Spec/Liprin-gamma/Mad/Fmr1/simj/veli/Fsn/RhoGAP92B/Synd/Src64B/Rae1/Pi3K92E/pum/dysc/spin/HSPC300/SkpA/nmo/Cul2/Arfip/kis/Rab8/tkv/cpb/Patr-1/TBPH/Tor/PIP5K59B/hiw/brat/spas/Syp/Cdc42/Sec8/Strip
GO:BP	actin filament-based process	GO:0030029	150/3338	331/12653	4.5218e-14	1.86859e-12	1.00224e-12	Arpc3A/RhoGEF3/Kank/loco/Msp300/nwk/capu/pico/CG43901/ALiX/flw/SCAR/tmod/siz/blow/Vav/zip/shi/Khc/CG42673/svr/Rab11/spoon/ena/dco/IKKepsilon/capt/cindr/sif/Nedd4/Pak3/SelR/Cip4/fwd/p38b/gukh/Abl/Hip1/beta-Spec/Graf/cib/pod1/Actn/Atx2/hts/tral/Arp2/sau/Naus/gek/CG33521/Lam/DCP2/brun/Frl/LRR/Arpc5/C3G/RhoGAP68F/Smn/CG31715/CanB2/CG5022/Exo84/Tm1/ghi/Arpc2/Rho1/Myo95E/Ret/hep/Arp3/Ssrp/alpha-Spec/Ps…
GO:BP	morphogenesis of an epithelium	GO:0002009	153/3338	341/12653	6.97689e-14	2.80414e-12	1.50403e-12	Ras85D/Vha26/loco/baz/CadN/orb/TSG101/CSN7/flw/Eip63E/Sac1/hdc/bnl/Vav/fred/zip/shi/rin/Rab11/hbs/spoon/Dp/Ptp10D/ct/ena/aop/trh/CCT3/dco/CadN2/Lkb1/Raf/raw/Nsf2/arm/Sec61alpha/Rheb/Cip4/slpr/dmt/kuk/Abl/sds22/Dad/Nrx-IV/lig/Ptp4E/stan/alien/Parp/gammaCOP/VhaAC39-1/Drak/Pcyt1/par-1/slmb/Grasp65/Lam/Frl/kmr/noc/Mcr/msk/rl/Dhc64C/kkv/nej/Akt/Rho1/hep/Pkn/ATP6AP2/Dsor1/CSN6/Dg/mmy/Rab30/Vang/yrt/S/C…
GO:BP	regulation of developmental growth	GO:0048638	118/3338	243/12653	6.95728e-14	2.80414e-12	1.50403e-12	plum/mnb/Ras85D/CASK/Actbeta/nwk/CadN/pico/TSG101/Octbeta2R/atl/dally/futsch/cic/Hs6st/pnut/Syx7/Wbp2/Tbce/RASSF8/ena/mbt/Eps-15/dbo/Raf/Liprin-alpha/Nsf2/stj/Rheb/Cip4/p38b/Abl/beta-Spec/sgg/Sdc/Dad/lig/Mob2/stan/Fak/bchs/Syn1/Arp2/caz/Nf1/RtGEF/Sema2a/stau/Tao/dj-1beta/raptor/RhoGAP68F/Smn/Syn2/Ythdf/Akt/Arp3/wit/alpha-Spec/sfl/ebi/Liprin-gamma/chico/Mad/Fmr1/simj/Vang/veli/Fsn/RhoGAP92B/Ac76E/…
GO:BP	MAPK cascade	GO:0000165	81/3338	147/12653	1.17966e-13	4.6772e-12	2.50867e-12	Ras85D/HUWE1/ALiX/flw/Sac1/Vav/Ccm3/Nf-YB/Mnn1/ben/Usp47/sigmar/mbt/rdx/Lkb1/Pak3/Raf/Usp5/raw/jeb/p38b/slpr/sgg/CG6180/lncRNA:Hsromega/ATPsynD/drk/Lamtor1/crc/spg/Ubc6/MAPk-Ak2/rl/poe/Ptp61F/hep/ebi/Dsor1/alph/DopEcR/Traf6/fmt/Cbl/Urm1/syd/Cdc37/M1BP/sNPF-R/SkpA/Aplip1/step/Alg-2/puc/Alk/Mekk1/Ufd4/bsk/cpb/cnk/slim/Atg9/krz/POSH/Rac1/XNP/Kcmf1/sty/Spred/Mnat9/PEK/Rab3-GEF/RhoGAP5A/InR/Cdc42/PTP-…
GO:BP	positive regulation of transport	GO:0051050	88/3338	165/12653	1.31484e-13	5.14364e-12	2.75885e-12	LpR2/mnb/Hk/CASK/prtp/elm/CaBP1/gzl/Syt4/qvr/Sec24CD/Pkc53E/lap/Syx7/Rab11/CG6329/drpr/cindr/DCTN2-p50/garz/Nedd4/eag/stj/Sec61alpha/Abl/SERCA/Graf/levy/BicD/tral/hob/Tom7/drk/Tao/Mvl/Klp64D/nSyb/AdipoR/Orai/Vps35/Wnk/stol/swm/PGAP1/Stim/Sec23/CG6454/Nrx-1/Sar1/O-fut1/Flo2/Cortactin/S/RhoGAP92B/Sec71/Cbl/wls/Rab3GAP1/dysc/Sec5/Moe/PICK1/Ttd14/Crag/Tango1/Syt1/CG7781/Glut1/Cadps/Itpr/Rab1/BORCS5/A…
GO:BP	regulation of MAPK cascade	GO:0043408	74/3338	130/12653	1.44594e-13	5.58209e-12	2.99402e-12	Ras85D/HUWE1/ALiX/flw/Sac1/Vav/Ccm3/Nf-YB/Mnn1/ben/Usp47/sigmar/mbt/rdx/Lkb1/Pak3/Raf/Usp5/raw/jeb/slpr/sgg/CG6180/lncRNA:Hsromega/ATPsynD/drk/Lamtor1/crc/spg/Ubc6/MAPk-Ak2/poe/Ptp61F/ebi/alph/DopEcR/Traf6/fmt/Cbl/Urm1/syd/Cdc37/M1BP/sNPF-R/SkpA/Aplip1/step/Alg-2/puc/Alk/Mekk1/Ufd4/cpb/cnk/slim/Atg9/krz/POSH/Rac1/XNP/Kcmf1/sty/Spred/Mnat9/PEK/Rab3-GEF/RhoGAP5A/InR/Cdc42/PTP-ER/Strip/rpr/cpa/JMJD6
GO:BP	negative regulation of signal transduction	GO:0009968	167/3338	386/12653	2.4631e-13	9.38536e-12	5.03394e-12	RapGAP1/Dap160/mnb/Ras85D/Usp7/HUWE1/Cul1/CG2918/Atg1/TER94/flw/PPP4R2r/TM9SF2/dally/Sac1/Vav/Lpin/gcl/Tango9/Npl4/Synj/Mnn1/anchor/Patronin/Usp2/Ptp10D/AMPKalpha/aop/dco/Eps-15/Herc4/hang/rdx/Sik3/Nedd4/Raf/Usp5/Ulp1/Nedd8/raw/EloB/scny/Rheb/puf/p38b/CG14182/sgg/Dad/CG6180/lig/Graf/Ptp4E/Xxylt/gro/Axn/ATPsynD/pic/Duba/Prosap/Tao/par-1/Dd/slmb/vap/Ufd1/Ndfip/LRR/Ubc6/cv/senju/Socs36E/Cul3/poe/wrd…
GO:BP	negative regulation of response to stimulus	GO:0048585	186/3338	444/12653	3.92079e-13	1.47482e-11	7.91037e-12	Cbp53E/RapGAP1/Dap160/mnb/Ras85D/Usp7/HUWE1/Cul1/CG2918/Atg1/TER94/flw/PPP4R2r/TM9SF2/dally/Sac1/Vav/SP2353/Lpin/gcl/Tango9/Npl4/Synj/Mnn1/Csp/anchor/Patronin/Usp2/Ptp10D/AMPKalpha/aop/GlyP/dco/Eps-15/Herc4/hang/rdx/Sik3/Nedd4/Raf/Usp5/Ulp1/Nedd8/RYBP/raw/EloB/scny/Rheb/puf/p38b/CG14182/GstO2/sgg/Dad/CG6180/lig/Graf/Ptp4E/wun/Stat92E/Xxylt/gro/Axn/ATPsynD/pic/Sema2a/Duba/Prosap/Tao/par-1/Dd/MED6/…
GO:BP	cellular response to chemical stimulus	GO:0070887	179/3338	424/12653	4.8509e-13	1.80159e-11	9.66303e-12	MtnF/Trap1/HUWE1/Cul1/CG2918/Atg1/TER94/Sirup/Chchd2/Syt4/MsrA/5-HT7/FASN1/Lpin/kcc/Spp/Xbp1/Hydr2/sima/Der-2/ben/Usp47/Ns3/Sod2/tub/GlyP/Mkrn1/rdx/Sik3/Ulp1/CG11779/Der-1/sordd1/GlyS/Rheb/p38b/slpr/Crtc/sgg/S6k/wun/Stat92E/CG4390/Hsp60A/VhaAC39-1/emb/G9a/Herp/drk/Lamtor1/Iswi/5-HT2A/CG9231/Glo1/slmb/Ufd1/crc/dj-1beta/CG32262/St3/TrissinR/raptor/Tom40/AdipoR/Grx1/Sirt1/Atg18b/sordd2/rl/CG3061/Lam…
GO:BP	regulation of protein catabolic process	GO:0042176	57/3338	92/12653	6.93968e-13	2.54513e-11	1.36511e-11	Cul1/TER94/UbcE2H/Xbp1/ari-1/Usp2/Usp47/dco/rdx/Nedd4/fzr/Usp5/Ufl1/EloB/scny/sgg/Axn/pic/slmb/Rpn3/Ufd1/Ubc6/RabX1/Socs36E/poe/Lon/Rpn1/ebi/CG8209/CG8405/Apc/Usp14/Rnf146/Fsn/CSN5/CG31855/Cul4/SkpA/STUB1/Cul2/Rpn2/Ufd4/muskelin/Roc1a/CkIalpha/eIF3h/REG/POSH/Tor/RanBPM/Kcmf1/CkIIalpha/wds/Sou/rpr/Tnks/Oda
GO:BP	endoplasmic reticulum to Golgi vesicle-mediated transport	GO:0006888	49/3338	74/12653	7.43831e-13	2.69432e-11	1.44513e-11	GABPI/boca/KdelR/Sec24CD/CG7011/Bet3/Madm/deltaCOP/bai/Trs31/gammaCOP/CG5510/p24-1/CG13887/CG9067/opm/Sec24AB/Bet1/Sec22/PGAP1/Syx5/Sec23/Sar1/Ykt6/epsilonCOP/ergic53/S/CG17883/betaCOP/Sec13/Bet5/CG32576/CG32069/PGAP5/Syx17/Tango1/l(3)76BDm/CG3104/Rab1/CG3652/CG17765/Gos28/alphaCOP/Zw10/PAPLA1/Arl1/eca/Trs20/p115
GO:BP	establishment of protein localization to organelle	GO:0072594	96/3338	190/12653	7.73904e-13	2.76907e-11	1.48522e-11	Trp1/Ripalpha/CG2918/Sgt/UQCR-C1/CG1598/Sec61beta/CG31229/Spase22-23/Pex13/rdx/CG11779/Srp19/Sec61alpha/CG7382/Roe1/OXA1L/sgg/CG7639/Pink1/SrpRalpha/Spase25/Ntf-2/CG8860/car/Hsp60A/Stam/cdm/Tom7/Tim23/Tnpo/CG7394/Klp64D/lsn/Vps28/Tom40/Tom70/CG10286/Ran/msk/Mon1/Hsc70-5/CG14894/Tim9a/Pex19/Vps37B/Srp14/Srp9/Srp68/Pex14/Tim8/Srp72/Sec13/Su(dx)/Srp54k/CG7791/Rab3GAP1/Nxt1/Nup93-2/CG8728/p/blp/Sec63…
GO:BP	axon development	GO:0061564	150/3338	342/12653	1.14248e-12	4.0278e-11	2.16035e-11	sm/sli/CadN/dpr11/Acsl/HUWE1/Atg1/atl/Dlic/SCAR/robo3/Gclc/RhoGAPp190/dally/beat-Ib/Sac1/futsch/Vav/fz2/Khc/uzip/beat-Ic/ben/RhoGAP93B/sff/Ptp10D/AMPKalpha/ena/capt/side/sif/Fas3/CadN2/chb/Nedd4/Pak3/not/Ulp1/Liprin-alpha/SelR/jeb/Rheb/beat-IIIb/Abl/beta-Spec/nudE/Sdc/Dad/Ptp4E/SrpRalpha/S6k/stan/bchs/fra/pod1/hts/Nrt/Sema2a/meigo/Frl/raptor/msps/Unc-115a/Cul3/Ptp61F/bur/Ythdf/Akt/Rho1/hep/Arp3/a…
GO:BP	protein modification by small protein conjugation	GO:0032446	118/3338	251/12653	1.16302e-12	4.0278e-11	2.16035e-11	Ubc2/HUWE1/Cul1/CG11658/gzl/CG1317/gcl/UbcE2H/Uba1/SCCRO/ari-1/ben/Iru/dod/Mkrn1/Herc4/CG1812/rdx/CG10254/Nedd4/dbo/fzr/Nedd8/Ufl1/sordd1/bon/SCCRO4/CG11700/Bruce/msl-2/hyd/CG6325/bchs/Bre1/Ubr3/car/Cnot4/CG13344/pic/slmb/CG4238/wcy/Ndfip/SCCRO3/Ubc6/CG4080/KLHL18/sordd2/Cul3/CG17059/Ufc1/Ube4A/Ubc4/pall/Pli/Cul5/l(3)73Ah/CG8209/sip3/Usp14/CG10646/CG9855/Ubr1/HERC2/Su(dx)/CG17019/Cul4/Traf6/Trc8/…
GO:BP	vesicle organization	GO:0016050	74/3338	134/12653	1.16688e-12	4.0278e-11	2.16035e-11	comt/TER94/TSG101/shrb/Syt4/Arl8/Sec24CD/shi/lap/Syx7/alphaSnap/Syx13/aus/Rab11/dop/Vps45/AP-1gamma/ArfGAP3/car/sau/ref(2)P/lsn/nSyb/Vps28/Sec24AB/Hs3st-B/Bet1/Vps16A/Rab3/Sec22/RabX1/Syx6/Blos1/Syx5/Sec23/CG6454/Sar1/Blos2/Snx6/CG1407/Rab35/Vps20/Ocrl/Fmr1/Vamp7/Sec13/fws/Tusp/ClC-c/Sec5/Rab5/Syx17/cert/Tango1/Syt1/Syx8/Rab8/Rab7/CG17765/Gos28/mv/Uvrag/Pten/Strump/Rme-8/Vps8/Arl1/SWIP/Snap25/ca/…
GO:BP	signal release	GO:0023061	73/3338	132/12653	1.50604e-12	5.13804e-11	2.75585e-11	Frq1/Syn/CASK/comt/Frq2/gammaSnap1/Syt4/Arl8/shi/alphaSnap/Syx13/Csp/Scamp/dco/Nsf2/Vps45/Vap33/Ih/Rop/BicD/NFAT/gammaSnap2/nSyb/AdipoR/CanB2/Vps35/Rab3/Exo84/Syx6/nej/Akt/DCAF12/Rep/Sec10/Flo2/veli/RhoGAP92B/Rab3-GAP/HDAC6/Gdi/rogdi/Dys/wls/Rab3GAP1/Hsc70-4/Sec5/PICK1/Syx17/cpx/Syt1/CG9650/Glut1/Cadps/Itpr/Mctp/Syx8/CG15537/Rab1/mop/DCTN1-p150/Rph/Hrs/stmA/Sec6/stac/Rab3-GEF/Arl1/InR/Snap25/Cdc4…
GO:BP	neuron projection development	GO:0031175	197/3338	483/12653	1.588e-12	5.3554e-11	2.87243e-11	sm/sli/Hasp/CadN/dpr11/Acsl/HUWE1/Atg1/TER94/atl/Dlic/SCAR/robo3/Gclc/shrb/RhoGAPp190/dally/beat-Ib/Sac1/futsch/Vav/fz2/Khc/uzip/Patronin/beat-Ic/prel/ben/RhoGAP93B/sff/Ptp10D/AMPKalpha/ct/ena/jim/capt/side/sif/Fas3/CadN2/chb/Nedd4/Pak3/not/Ulp1/Liprin-alpha/SelR/nudC/jeb/Rheb/beat-IIIb/Nak/Abl/GM130/beta-Spec/nudE/Sdc/Dad/Rop/Ptp4E/SrpRalpha/S6k/stan/bchs/fra/pod1/hts/Nrt/G9a/TrpRS/Sema2a/Naus/E…
GO:BP	cellular respiration	GO:0045333	76/3338	140/12653	1.86969e-12	6.2337e-11	3.34352e-11	SdhA/Cyt-c1/ND-B14.5B/CG5214/GC1/Sirup/Chchd2/ND-75/CG14757/ND-B14.5A/cype/UQCR-6.4/ATPsynbeta/SdhB/SdhC/mAcon1/Mdh1/bsf/Gpo1/ND-B22/Idh3b/ATPsynF/CG9005/SdhD/Ogdh/ScsbetaG/ND-51/CG42376/Idh3a/Cyt-c-p/COX4/UQCR-Q/ND-42/Pink1/ND-20/RFeSP/Tspo/levy/ND-49/COX5A/dj-1beta/ND-13B/ND-B17.2/CG34150/Nipsnap/sun/Rim2/ND-B17/CG6115/ND-19/Scsalpha1/ND-ASHI/Mdh2/ScsbetaA/COX5B/ATPCL/CG11035/COX7A/Fum1/UQCR-C2…
GO:BP	cell morphogenesis involved in differentiation	GO:0000904	195/3338	478/12653	2.02555e-12	6.6775e-11	3.58155e-11	sm/sli/Ras85D/baz/CadN/dpr11/Acsl/HUWE1/Atg1/TER94/atl/Dlic/SCAR/robo3/Gclc/shrb/RhoGAPp190/dally/beat-Ib/Sac1/futsch/Vav/fz2/Khc/uzip/beat-Ic/prel/ben/RhoGAP93B/sff/Ptp10D/AMPKalpha/ct/CG41099/ena/jim/capt/side/sif/Fas3/CadN2/chb/Nedd4/Pak3/not/Ulp1/Liprin-alpha/SelR/nudC/jeb/Rheb/beat-IIIb/Nak/Abl/GM130/beta-Spec/nudE/sgg/Sdc/Dad/Ptp4E/SrpRalpha/S6k/stan/fra/Stat92E/pod1/hts/Nrt/G9a/TrpRS/Sema2…
GO:BP	cell part morphogenesis	GO:0032990	187/3338	455/12653	2.67567e-12	8.72269e-11	4.67851e-11	sm/sli/CadN/dpr11/Acsl/HUWE1/Atg1/TER94/atl/Dlic/Marf/SCAR/robo3/Gclc/shrb/RhoGAPp190/dally/beat-Ib/Sac1/bnl/futsch/Vav/fz2/Khc/uzip/beat-Ic/prel/ben/RhoGAP93B/sff/Ptp10D/AMPKalpha/ct/ena/jim/capt/side/sif/Fas3/CadN2/chb/Nedd4/Pak3/not/Ulp1/Liprin-alpha/SelR/nudC/jeb/Rheb/beat-IIIb/Nak/Abl/GM130/beta-Spec/nudE/Sdc/Dad/Ptp4E/SrpRalpha/S6k/stan/Mitofilin/fra/pod1/hts/Nrt/G9a/TrpRS/Sema2a/Naus/E(Pc)…
GO:BP	vesicle-mediated transport in synapse	GO:0099003	64/3338	111/12653	2.90664e-12	9.37151e-11	5.02651e-11	Dap160/mnb/Syn/CASK/comt/gammaSnap1/Nlg4/Syt4/shi/lap/alphaSnap/Syx13/Synj/Csp/Scamp/Vps29/Rab11/Eps-15/Nsf2/Vps45/stj/Vap33/EndoA/Rop/BicD/Nlg2/NFAT/gammaSnap2/nSyb/Vps35/tweek/Rab3/Exo84/Syx6/Blos1/Nrx-1/Sec10/Rab35/Fmr1/Rab3GAP1/Sec5/spin/Rab5/Syx17/cpx/Syt1/Cadps/Mctp/Syx8/AP-2alpha/mop/Rph/stmA/Dab/twf/Sec6/Nlg3/stac/brat/Arl1/VGAT/Snap25/Sec8/Arl2
GO:BP	regulation of GTPase activity	GO:0043087	61/3338	104/12653	3.37729e-12	1.07706e-10	5.77694e-11	CG1695/RapGAP1/tbc/Evi5/Vav/Dhit/RhoGAP19D/RhoGAP93B/RSG7/ArfGAP1/CG34393/sif/garz/Rlip/Asap/GAPcenA/ArfGAP3/drongo/Nf1/RtGEF/vimar/vap/CG5916/brun/spg/CG34408/C3G/CG42795/CG5521/RN-tre/RhoGAP1A/TBC1D16/CG7369/Mon1/CG8155/CG3703/Sec23/Ziz/Tbc1d8-9/CenG1A/SIDL/RhoGAP92B/CG17883/Rab3-GAP/Gapvd1/CG42450/Rab3GAP1/RasGAP1/Bulli/TBC1D5/wkd/Crag/CG4041/CG4853/PlexB/raskol/CG1116/GAPsec/RhoGAP5A/strat/Rgl
GO:BP	cell morphogenesis involved in neuron differentiation	GO:0048667	182/3338	441/12653	3.44348e-12	1.08636e-10	5.82682e-11	sm/sli/Ras85D/baz/CadN/dpr11/Acsl/HUWE1/Atg1/TER94/atl/Dlic/SCAR/robo3/Gclc/shrb/RhoGAPp190/dally/beat-Ib/Sac1/futsch/Vav/fz2/Khc/uzip/beat-Ic/prel/ben/RhoGAP93B/sff/Ptp10D/AMPKalpha/ct/ena/jim/capt/side/sif/Fas3/CadN2/chb/Nedd4/Pak3/not/Ulp1/Liprin-alpha/SelR/nudC/jeb/Rheb/beat-IIIb/Nak/Abl/GM130/beta-Spec/nudE/Sdc/Dad/Ptp4E/SrpRalpha/S6k/stan/fra/pod1/hts/Nrt/G9a/TrpRS/Sema2a/E(Pc)/meigo/fry/Fr…
GO:BP	axonogenesis	GO:0007409	144/3338	330/12653	5.20221e-12	1.62375e-10	8.70918e-11	sm/sli/CadN/dpr11/Acsl/HUWE1/Atg1/atl/Dlic/SCAR/robo3/Gclc/RhoGAPp190/dally/beat-Ib/Sac1/futsch/Vav/fz2/Khc/uzip/beat-Ic/ben/RhoGAP93B/sff/Ptp10D/AMPKalpha/ena/capt/side/sif/Fas3/CadN2/chb/Nedd4/Pak3/not/Ulp1/Liprin-alpha/SelR/jeb/Rheb/beat-IIIb/Abl/beta-Spec/nudE/Sdc/Dad/Ptp4E/SrpRalpha/S6k/stan/fra/pod1/hts/Nrt/Sema2a/meigo/Frl/raptor/msps/Unc-115a/Cul3/Ptp61F/bur/Ythdf/Rho1/hep/alpha-Spec/beat…
GO:BP	establishment of organelle localization	GO:0051656	87/3338	171/12653	5.64591e-12	1.7437e-10	9.35251e-11	CASK/Msp300/baz/ALiX/flw/Marf/shi/Khc/lap/east/Khc-73/Rab11/Ns3/AGO2/milt/dop/DCTN2-p50/chb/Liprin-alpha/nudC/ens/nudE/ArfGAP3/Rop/Pink1/pix/BicD/gammaCOP/emb/Nmd3/Lam/CG11123/msps/Ran/Exo84/Dhc64C/Blos1/Sec23/Myo95E/Sar1/Arp10/LTV1/Sec10/Mad1/Rab35/Fmr1/koi/Nnf1a/Top2/Eb1/CG32409/ric8a/Sec5/Klp10A/Arp1/Aplip1/sqh/dsh/aPKC/BORCS5/AP-2alpha/Rab7/DCTN1-p150/tacc/Hrs/kud/jar/CG17765/Klp98A/Sec6/faf/…
GO:BP	glycerolipid metabolic process	GO:0046486	82/3338	158/12653	5.9995e-12	1.8336e-10	9.83471e-11	Acsl/sp3/Sac1/FASN1/Lpin/Pcyt2/CG2201/Synj/Xbp1/Hydr2/frj/CG1309/Taz/CG15111/Ipp/CG14411/Pect/rdgB/Sik3/Lkb1/nes/INPP5E/Vap33/fwd/Ttc7/bbc/CG17646/PIG-T/Pcyt1/CLS/Dd/CG9391/crc/GAA1/CG7990/Serinc/Socs36E/PGAP1/PIG-G/inaE/Akt/schlank/5PtaseI/Gpdh1/PIG-L/Ire1/Dpm3/CG2818/chico/Ocrl/Hyccin/PIG-F/FIG4/Socs16D/Mppe/PGAP5/Pi3K92E/Hsl/CG6805/Gk2/PGS1/CG6707/Agpat1/PIG-K/PIG-S/PIG-Q/CG31140/puml/CG18135/…
GO:BP	synaptic vesicle cycle	GO:0099504	63/3338	110/12653	6.45255e-12	1.95173e-10	1.04683e-10	Dap160/mnb/Syn/CASK/comt/gammaSnap1/Nlg4/Syt4/shi/lap/alphaSnap/Syx13/Synj/Csp/Scamp/Vps29/Rab11/Eps-15/Nsf2/Vps45/stj/Vap33/EndoA/Rop/BicD/Nlg2/NFAT/gammaSnap2/nSyb/Vps35/tweek/Rab3/Exo84/Syx6/Blos1/Nrx-1/Sec10/Fmr1/Rab3GAP1/Sec5/spin/Rab5/Syx17/cpx/Syt1/Cadps/Mctp/Syx8/AP-2alpha/mop/Rph/stmA/Dab/twf/Sec6/Nlg3/stac/brat/Arl1/VGAT/Snap25/Sec8/Arl2
GO:BP	cell projection morphogenesis	GO:0048858	183/3338	447/12653	6.90598e-12	2.02635e-10	1.08685e-10	sm/sli/CadN/dpr11/Acsl/HUWE1/Atg1/TER94/atl/Dlic/SCAR/robo3/Gclc/shrb/RhoGAPp190/dally/beat-Ib/Sac1/bnl/futsch/Vav/fz2/Khc/uzip/beat-Ic/prel/ben/RhoGAP93B/sff/Ptp10D/AMPKalpha/ct/ena/jim/capt/side/sif/Fas3/CadN2/chb/Nedd4/Pak3/not/Ulp1/Liprin-alpha/SelR/nudC/jeb/Rheb/beat-IIIb/Nak/Abl/GM130/beta-Spec/nudE/Sdc/Dad/Ptp4E/SrpRalpha/S6k/stan/fra/pod1/hts/Nrt/G9a/TrpRS/Sema2a/Naus/E(Pc)/meigo/fry/Frl/…
GO:BP	plasma membrane bounded cell projection morphogenesis	GO:0120039	183/3338	447/12653	6.90598e-12	2.02635e-10	1.08685e-10	sm/sli/CadN/dpr11/Acsl/HUWE1/Atg1/TER94/atl/Dlic/SCAR/robo3/Gclc/shrb/RhoGAPp190/dally/beat-Ib/Sac1/bnl/futsch/Vav/fz2/Khc/uzip/beat-Ic/prel/ben/RhoGAP93B/sff/Ptp10D/AMPKalpha/ct/ena/jim/capt/side/sif/Fas3/CadN2/chb/Nedd4/Pak3/not/Ulp1/Liprin-alpha/SelR/nudC/jeb/Rheb/beat-IIIb/Nak/Abl/GM130/beta-Spec/nudE/Sdc/Dad/Ptp4E/SrpRalpha/S6k/stan/fra/pod1/hts/Nrt/G9a/TrpRS/Sema2a/Naus/E(Pc)/meigo/fry/Frl/…
GO:BP	positive regulation of hydrolase activity	GO:0051345	67/3338	120/12653	6.90643e-12	2.02635e-10	1.08685e-10	CG1695/RapGAP1/tbc/Evi5/Vav/Cp1/Dhit/hbs/RhoGAP93B/RSG7/CG34393/IKKepsilon/sif/Rlip/Asap/GAPcenA/Cyt-c-p/RtGEF/Dd/vimar/vap/CG5916/spg/CG34408/C3G/26-29-p/HtrA2/CG42795/CG5521/RN-tre/RhoGAP1A/TBC1D16/CG7369/Cul3/Mon1/CG8155/CG3703/Sec23/Ziz/Tbc1d8-9/CenG1A/pen-2/ScsbetaA/PolZ2/RhoGAP92B/Jafrac2/CG17883/Rab3-GAP/CG42450/Rab3GAP1/TBC1D5/hid/wkd/Crag/REG/PPP1R15/CG4041/CG4853/CG1116/GAPsec/RnrS/Galp…
GO:BP	protein ubiquitination	GO:0016567	106/3338	223/12653	7.03383e-12	2.04329e-10	1.09594e-10	Ubc2/HUWE1/Cul1/CG11658/gzl/CG1317/gcl/UbcE2H/Uba1/SCCRO/ari-1/ben/Iru/dod/Mkrn1/Herc4/CG1812/rdx/CG10254/Nedd4/dbo/fzr/sordd1/bon/SCCRO4/CG11700/Bruce/msl-2/hyd/CG6325/bchs/Bre1/Ubr3/car/Cnot4/CG13344/pic/slmb/CG4238/wcy/Ndfip/SCCRO3/Ubc6/CG4080/KLHL18/sordd2/Cul3/Ube4A/Ubc4/pall/Pli/Cul5/l(3)73Ah/CG8209/sip3/Usp14/CG10646/CG9855/Ubr1/HERC2/Su(dx)/CG17019/Cul4/Traf6/Trc8/CG14435/Cbl/CG7220/Diap2…
GO:BP	neuron projection morphogenesis	GO:0048812	182/3338	445/12653	8.74529e-12	2.51556e-10	1.34925e-10	sm/sli/CadN/dpr11/Acsl/HUWE1/Atg1/TER94/atl/Dlic/SCAR/robo3/Gclc/shrb/RhoGAPp190/dally/beat-Ib/Sac1/futsch/Vav/fz2/Khc/uzip/beat-Ic/prel/ben/RhoGAP93B/sff/Ptp10D/AMPKalpha/ct/ena/jim/capt/side/sif/Fas3/CadN2/chb/Nedd4/Pak3/not/Ulp1/Liprin-alpha/SelR/nudC/jeb/Rheb/beat-IIIb/Nak/Abl/GM130/beta-Spec/nudE/Sdc/Dad/Ptp4E/SrpRalpha/S6k/stan/fra/pod1/hts/Nrt/G9a/TrpRS/Sema2a/Naus/E(Pc)/meigo/fry/Frl/rapt…
GO:BP	positive regulation of developmental process	GO:0051094	113/3338	244/12653	1.16727e-11	3.32501e-10	1.78341e-10	Dap160/mnb/Ras85D/E2f1/Actbeta/pico/Cul1/Atg1/Octbeta2R/atl/Marf/Sec24CD/pnut/Wbp2/Nf-YB/ari-1/Dp/mbt/Mkrn1/sif/Nedd4/Pak3/Raf/nudC/Rheb/p38b/GM130/nudE/Sdc/Rop/Pink1/stan/bchs/tral/Arp2/G9a/caz/Nf1/stau/Naus/slmb/RhoGAP68F/Smn/cv/rl/Dhc64C/Akt/Sec23/Arp3/wit/Sar1/ebi/chico/Mad/Fmr1/simj/Vang/omd/RhoGAP92B/Synd/DAAM/Sec71/Wnt5/Pi3K92E/spn-F/RasGAP1/oc/PICK1/Cdc37/sNPF-R/nmo/hid/ssp/CG13001/IntS1/…
GO:BP	neurotransmitter secretion	GO:0007269	58/3338	99/12653	1.22734e-11	3.42954e-10	1.83947e-10	Frq1/Syn/CASK/comt/Frq2/gammaSnap1/Syt4/Arl8/shi/alphaSnap/Syx13/Csp/Scamp/Nsf2/Vps45/Vap33/Ih/Rop/BicD/NFAT/gammaSnap2/nSyb/CanB2/Rab3/Exo84/Syx6/nej/DCAF12/Rep/Sec10/veli/Rab3-GAP/HDAC6/Gdi/rogdi/Dys/Rab3GAP1/Hsc70-4/Sec5/Syx17/cpx/Syt1/Cadps/Mctp/Syx8/mop/DCTN1-p150/Rph/stmA/Sec6/stac/Rab3-GEF/Arl1/Snap25/Cdc42/SH3PX1/Sec8/Arl2
GO:BP	signal release from synapse	GO:0099643	58/3338	99/12653	1.22734e-11	3.42954e-10	1.83947e-10	Frq1/Syn/CASK/comt/Frq2/gammaSnap1/Syt4/Arl8/shi/alphaSnap/Syx13/Csp/Scamp/Nsf2/Vps45/Vap33/Ih/Rop/BicD/NFAT/gammaSnap2/nSyb/CanB2/Rab3/Exo84/Syx6/nej/DCAF12/Rep/Sec10/veli/Rab3-GAP/HDAC6/Gdi/rogdi/Dys/Rab3GAP1/Hsc70-4/Sec5/Syx17/cpx/Syt1/Cadps/Mctp/Syx8/mop/DCTN1-p150/Rph/stmA/Sec6/stac/Rab3-GEF/Arl1/Snap25/Cdc42/SH3PX1/Sec8/Arl2
GO:BP	small GTPase mediated signal transduction	GO:0007264	87/3338	173/12653	1.27196e-11	3.5207e-10	1.88837e-10	RhoGEF3/RapGAP1/Ras85D/siz/RhoGAPp190/CG18659/CG9098/14-3-3zeta/Uba1/RhoGAP19D/Rab11/ArfGAP1/Sur-8/CG34393/sif/garz/Raf/Rlip/Ras64B/Rheb/RabX4/Cdep/Graf/Efa6/drk/Nf1/vap/spg/CG34408/C3G/RhoGAP68F/CG5521/RhoGAP1A/Rab3/RabX1/CG7369/CRMP/Rho1/Ziz/Rab4/PsGEF/Rep/Fnta/Rab18/Rab35/Rab30/RhoGAP92B/Gapvd1/Gdi/alph/CG6607/Sec71/Rab3GAP1/pns/alpha-Catr/Rab5/RhoBTB/Crag/step/Sbf/Rab39/Hmgcr/Rab6/Rab1/Rab8/R…
GO:BP	positive regulation of cellular component biogenesis	GO:0044089	74/3338	139/12653	1.29554e-11	3.55245e-10	1.9054e-10	mnb/Usp7/pico/Cul1/Octbeta2R/SCAR/shi/wde/Synj/svr/ena/dco/sif/chb/Nedd4/Pak3/Su(var)205/Ulp1/Rheb/p38b/Abl/Sdc/Stat92E/Atx2/Arp2/caz/stau/slmb/Lam/LRR/RhoGAP68F/Smn/cnn/msps/bur/hep/Arp3/Ssrp/wit/PsGEF/Mad/Rab35/Flo2/simj/Vrp1/RhoGAP92B/Synd/DAAM/Pi3K92E/Rpt4/Su(var)3-3/HSPC300/SkpA/nmo/Arfip/aPKC/tkv/cpb/hop/nclb/Tor/Abi/Rac1/mv/psidin/Aduk/Mnat9/Bap60/CoRest/spas/Cdc42/Sec8/cpa/Nup98-96
GO:BP	positive regulation of catabolic process	GO:0009896	95/3338	195/12653	1.51771e-11	4.1231e-10	2.21147e-10	Actbeta/Cul1/Atg1/TER94/Dora/shi/UbcE2H/Pop2/Synj/Xbp1/Pabp2/ari-1/sima/Usp2/AMPKalpha/Rga/GlyP/dco/rdx/Not1/Nedd4/fzr/Usp5/EloB/sordd1/GlyS/scny/sgg/Pink1/S6k/AP-1-2beta/Doa/Axn/pic/slmb/Ufd1/DCP2/Ubc6/twin/PAN2/RabX1/Socs36E/poe/Lon/Ythdf/hep/ebi/Ge-1/CG8405/Apc/sip3/Rnf146/Cpsf6/Fsn/CSN5/CG31855/Cul4/CycC/Traf6/pum/CG9951/roq/Not3/SkpA/hid/STUB1/Sbf/Fer2/Cul2/AP-2alpha/Ufd4/muskelin/Roc1a/CkIa…
GO:BP	mRNA metabolic process	GO:0016071	186/3338	460/12653	1.66639e-11	4.48548e-10	2.40584e-10	mbl/sm/CG8565/Rat1/su(w[a])/Prp18/orb/Cbp20/SmB/CG6999/Pop2/lost/Tudor-SN/Pabp2/Cdc27/CG30122/Hrb87F/Sf3b5/bsf/Rga/Srpk79D/Not1/HnRNP-K/x16/Sxl/su(f)/CG4887/CG4119/CG14641/Ars2/l(1)10Bb/ytr/Cdc2rk/CG11360/snf/snRNP-U1-70K/pix/nonA/Doa/Bx42/Srp54/caz/Wdr33/Acn/qkr58E-1/snRNP-U1-C/SmD2/U2af38/DCP2/TfIIB/qkr58E-2/Smn/CG3436/CG2124/twin/PAN2/rig/swm/Prp39/CG13850/c12.1/Ythdf/Mtr4/SRPK/SF1/Prp38/Ire1/…
GO:BP	phosphorylation	GO:0016310	170/3338	412/12653	1.84998e-11	4.88996e-10	2.62278e-10	l(3)80Fj/CG8565/Gapdh1/CG31145/Pfk/Dap160/Hex-A/mnb/Ald1/CASK/Actbeta/PyK/Atg1/Dyrk3/Eip63E/Eno/bnl/Ccm3/Pkc53E/shi/SNF4Agamma/CG4629/CG9098/Pgi/CG32944/svr/Tpi/PKD/sff/AMPKalpha/Gapdh2/Dgkepsilon/Nuak/dco/mbt/IKKepsilon/Srpk79D/dop/CG17528/S6KL/aux/Cdk12/Sik3/Lkb1/Pak3/Raf/Madm/Lk6/Dyrk2/bon/p38b/slpr/CG14408/Nak/Wee1/Abl/Cdc2rk/Hexim/sgg/Dad/PhKgamma/Pink1/S6k/Mob2/Fak/Doa/Axn/Ak1/Drak/Eph/Tao/…
GO:BP	regulation of anatomical structure size	GO:0090066	110/3338	237/12653	1.84824e-11	4.88996e-10	2.62278e-10	Arpc3A/Kank/Ras85D/Actbeta/nwk/CadN/pico/atl/tmod/RhoGAPp190/Atpalpha/zip/Sec24CD/shi/kcc/svr/spoon/AMPKalpha/dco/mbt/dop/garz/Madm/deltaCOP/Liprin-alpha/raw/Rheb/Cip4/p38b/Abl/Nrx-IV/S6k/stan/gammaCOP/Atx2/drk/Sema2a/Grasp65/gek/Lam/LRR/raptor/Arpc5/Mcr/MAPk-Ak2/Hs3st-B/CG31715/RhoGAP1A/Cad96Ca/rl/kkv/Ythdf/Akt/Arpc2/Rho1/Ssrp/PsGEF/chico/mmy/Fmr1/Vang/Cortactin/Vrp1/RhoGAP92B/DAAM/Src64B/Sema1a…
GO:BP	regulation of smoothened signaling pathway	GO:0008589	55/3338	93/12653	2.4848e-11	6.50929e-10	3.49133e-10	tws/Usp7/Cul1/TER94/flw/PPP4R2r/dally/Sac1/Npl4/Synj/dco/Herc4/rdx/Nedd4/Sxl/Ulp1/Nedd8/CG14182/sgg/Ubr3/pic/Tnpo/slmb/Ufd1/C3G/Cul3/bur/Pp2A-29B/nej/Su(dx)/Cul4/ttv/Su(fu)/cos/hyx/sqh/lwr/Su(var)2-10/UbcE2M/aPKC/Rpn13/Roc1a/CkIalpha/Uch-L5/Hrs/krz/apolpp/trol/Pp1alpha-96A/Gprk1/Pp4-19C/Sulf1/Gug/CkIIalpha/tow
GO:BP	mRNA processing	GO:0006397	149/3338	351/12653	2.79688e-11	7.26199e-10	3.89505e-10	mbl/sm/CG8565/su(w[a])/Prp18/orb/Cbp20/SmB/CG6999/lost/Pabp2/Cdc27/CG30122/Hrb87F/Sf3b5/bsf/Srpk79D/HnRNP-K/x16/Sxl/su(f)/CG4887/CG4119/CG14641/Ars2/l(1)10Bb/ytr/Cdc2rk/CG11360/snf/snRNP-U1-70K/nonA/Doa/Bx42/Srp54/caz/Wdr33/Acn/qkr58E-1/snRNP-U1-C/SmD2/U2af38/qkr58E-2/Smn/CG3436/PAN2/rig/swm/Prp39/c12.1/Mtr4/SRPK/SF1/Prp38/Ire1/hrg/mod/barc/Prp31/Fmr1/CG11586/cyp33/SF2/ncm/CG7483/Cpsf6/Psi/CG2926…
GO:BP	chemotaxis	GO:0006935	123/3338	276/12653	3.53419e-11	9.0959e-10	4.87869e-10	sm/sli/CadN/dpr11/Acsl/SCAR/robo3/dally/beat-Ib/Sac1/Vav/fz2/Khc/uzip/beat-Ic/RhoGAP93B/Ptp10D/AMPKalpha/ct/ena/capt/side/Fas3/CadN2/chb/Nedd4/Liprin-alpha/SelR/jeb/Rheb/beat-IIIb/Abl/beta-Spec/Sdc/Dad/Ptp4E/S6k/wun/stan/fra/pod1/hts/Nrt/Sema2a/E(Pc)/meigo/raptor/msps/Unc-115a/Ptp61F/bur/Rho1/hep/alpha-Spec/beat-Ia/nvy/Dg/haf/eIF2beta/mmy/Fmr1/CG30389/Vang/tutl/Dscam3/gogo/Cont/DAAM/Src64B/ttv/Ma…
GO:BP	cellular response to organic substance	GO:0071310	127/3338	288/12653	4.0498e-11	1.03323e-09	5.54183e-10	Trap1/HUWE1/Cul1/TER94/5-HT7/FASN1/Lpin/Spp/Xbp1/Hydr2/sima/Der-2/ben/Usp47/Ns3/tub/GlyP/Mkrn1/rdx/Sik3/Der-1/sordd1/GlyS/Rheb/slpr/Crtc/sgg/S6k/Stat92E/Hsp60A/G9a/Herp/drk/Lamtor1/Iswi/5-HT2A/Glo1/slmb/Ufd1/crc/TrissinR/raptor/AdipoR/Sirt1/sordd2/rl/CG3061/Lamtor3/Cul3/wrd/Ptp61F/Pp2A-29B/Akt/Hsc70-5/hep/Ire1/Edem1/Dsor1/Chd64/chico/Blimp-1/Fmr1/sip3/gce/Drat/Hr39/CG32276/Sec13/dome/DopEcR/Traf6…
GO:BP	regulation of autophagy	GO:0010506	64/3338	116/12653	4.09777e-11	1.03645e-09	5.55913e-10	Ras85D/Atg1/CG5026/shi/SREBP/Synj/sima/AMPKalpha/Sec61beta/sigmar/Sod2/Raf/scny/Sec61alpha/Rheb/Bruce/Pink1/S6k/Gyf/AP-1-2beta/Doa/Acn/wcy/raptor/rl/CG8155/hep/Atg14/Cpsf6/mask/CG12384/CycC/ema/Traf6/Rae1/Pi3K92E/Bulli/Syx17/hid/RagA-B/Sbf/Rab39/Fer2/AP-2alpha/bsk/Tor/Atg13/Pten/Rab21/Aduk/Mitf/Atg8a/sesB/PEK/InR/RagC-D/Pi3K59F/ca/Cisd2/CG4025/Atg18a/Lerp/Rubicon/Cdk8
GO:BP	locomotion	GO:0040011	181/3338	449/12653	4.25703e-11	1.06753e-09	5.72583e-10	sm/slgA/sli/Nmdar1/CASK/Msp300/shep/CadN/dpr11/Acsl/CG6330/SCAR/robo3/Evi5/ths/dally/beat-Ib/Sac1/bnl/Vav/zip/fz2/Khc/lap/uzip/beat-Ic/sima/RhoGAP93B/Ptp10D/AMPKalpha/ct/ena/aop/capt/side/Fas3/CadN2/chb/Nedd4/Liprin-alpha/SelR/jeb/Rheb/beat-IIIb/homer/Abl/beta-Spec/Sdc/Dad/Ptp4E/S6k/wun/stan/fra/Syn1/Stam/pod1/nonA/hts/cdm/Nrt/Pdfr/Sema2a/par-1/slmb/E(Pc)/meigo/Clic/LRR/raptor/msps/Rim2/Unc-115a/…
GO:BP	cellular component disassembly	GO:0022411	79/3338	155/12653	4.73259e-11	1.17673e-09	6.31153e-10	comt/Atg1/TER94/Drep4/atl/tmod/futsch/Khc/SREBP/alphaSnap/Patronin/eRF3/Sod2/Atg3/Usp5/CG6094/Nsf2/stj/beta-Spec/EndoA/Pink1/car/pix/ref(2)P/CG5676/Atg17/LRR/Drep1/Vps28/Ubc6/CG31715/Vps16A/Atg18b/wrd/CG8155/Hsc70-5/hep/Sar1/alpha-Spec/Atg14/Fmr1/Apc/Vps4/Vamp7/CG11975/Vha100-1/mask/ema/mRF1/twe/eRF1/CG17187/Klp10A/Syx17/Sbf/Rab39/Rab1/cpb/tacc/Atg9/pea/mRRF2/psidin/Atg13/Rab21/twf/Aduk/Mitf/Svil…
GO:BP	neuron projection guidance	GO:0097485	119/3338	266/12653	5.45718e-11	1.34549e-09	7.2167e-10	sm/sli/CadN/dpr11/Acsl/SCAR/robo3/dally/beat-Ib/Sac1/Vav/fz2/Khc/uzip/beat-Ic/RhoGAP93B/Ptp10D/AMPKalpha/ct/ena/capt/side/Fas3/CadN2/chb/Nedd4/Liprin-alpha/SelR/jeb/Rheb/beat-IIIb/Abl/beta-Spec/Sdc/Dad/Ptp4E/S6k/stan/fra/pod1/hts/Nrt/Sema2a/E(Pc)/meigo/raptor/msps/Unc-115a/Ptp61F/bur/Rho1/hep/alpha-Spec/beat-Ia/nvy/Dg/haf/eIF2beta/mmy/Fmr1/Vang/tutl/Dscam3/gogo/Cont/DAAM/Src64B/ttv/Mau2/Sema1a/Wn…
GO:BP	viral process	GO:0016032	33/3338	45/12653	6.08952e-11	1.48889e-09	7.98582e-10	TER94/TSG101/Cbp20/shrb/shi/Vps29/Rab11/AGO2/EloB/Sec61alpha/Mvb12/Ars2/AP-1-2beta/sau/Mvl/Rab3/Sar1/Sec10/Rab35/Vps4/Rab30/betaCOP/Rab5/Cul2/Rab1/Cbp80/Rab8/Rab7/Roc1a/Rab10/Sec8/Jra/Nup98-96
GO:BP	positive regulation of GTPase activity	GO:0043547	48/3338	78/12653	6.4299e-11	1.55912e-09	8.3625e-10	CG1695/RapGAP1/tbc/Evi5/Vav/Dhit/RhoGAP93B/RSG7/CG34393/sif/Rlip/Asap/GAPcenA/RtGEF/vimar/vap/CG5916/spg/CG34408/C3G/CG42795/CG5521/RN-tre/RhoGAP1A/TBC1D16/CG7369/Mon1/CG8155/CG3703/Sec23/Ziz/Tbc1d8-9/CenG1A/RhoGAP92B/CG17883/Rab3-GAP/CG42450/Rab3GAP1/TBC1D5/wkd/Crag/CG4041/CG4853/CG1116/GAPsec/RhoGAP5A/strat/Rgl
GO:BP	carbohydrate derivative biosynthetic process	GO:1901137	135/3338	313/12653	6.49586e-11	1.5622e-09	8.37904e-10	Ac3/FucT6/Cmpk/Acsl/FucTA/Mgat2/Dad1/AMPdeam/Alg11/blw/AdSS/Hs6st/ATPsyngamma/ATPsynbeta/Ost48/CG4341/Pdhb/Pabp2/Tpi/sff/CG33303/Scox/CG33774/Pgant2/alpha4GT1/CG3662/CG3253/ATPsynF/Mgat4a/C1GalTA/CG15651/CG31690/Pgant5/PIG-T/Adk3/Sccpdh1/Xxylt/CG9536/GalT1/ATPsynD/CG8668/Stt3A/CLS/wol/GCS1/sxc/crc/Pdha/meigo/Csgalnact/Adk2/GAA1/ATPsynCF6/CG7990/sun/senju/Papss/Ostgamma/CG3149/PIG-G/kkv/bur/fbl/Fu…
GO:BP	positive regulation of organelle organization	GO:0010638	64/3338	117/12653	6.73355e-11	1.6062e-09	8.61502e-10	nwk/Usp7/Cul1/Marf/SCAR/Vav/Syt4/shi/wde/Synj/svr/spoon/dco/chb/Nedd4/Su(var)205/Ulp1/p38b/sgg/Pink1/Stat92E/Atx2/stau/Naus/CG9231/slmb/Lam/nSyb/LRR/cnn/msps/bur/CG6454/hep/Ssrp/larp/Cortactin/Vrp1/pn/DAAM/Rab3GAP1/Invadolysin/Su(var)3-3/Sec5/Moe/SkpA/Sbf/Syt1/Drp1/hop/Abi/mv/Rab21/Aduk/Mitf/Mnat9/Bap60/CoRest/Pgam5/spas/ida/Tnks/Nup98-96/mtSSB
GO:BP	supramolecular fiber organization	GO:0097435	124/3338	282/12653	8.65123e-11	2.04699e-09	1.09793e-09	Arpc3A/Kank/Msp300/nwk/capu/pico/ALiX/atl/gammaTub23C/SCAR/tmod/Sac1/futsch/zip/shi/Khc/svr/Patronin/Tbce/spoon/ena/dco/IKKepsilon/capt/cindr/chb/hook/Nedd4/Pak3/SelR/ens/Vap33/Cip4/p38b/Abl/Hip1/beta-Spec/nudE/cib/Efa6/Actn/Atx2/hts/Arp2/Naus/gek/Lam/LRR/Arpc5/C3G/RhoGAP68F/Smn/cnn/CG31715/msps/CanB2/Dhc64C/Tm1/Arpc2/Rho1/Myo95E/Ret/hep/Arp3/Ssrp/alpha-Spec/PsGEF/Dg/p130CAS/Apc/Cortactin/Vrp1/Rh…
GO:BP	regulation of neurotransmitter levels	GO:0001505	61/3338	110/12653	8.80309e-11	2.06626e-09	1.10826e-09	Frq1/Syn/CASK/comt/Frq2/gammaSnap1/Syt4/Arl8/shi/alphaSnap/Syx13/Csp/Scamp/Nsf2/Vps45/Vap33/Ih/Rop/BicD/NFAT/gammaSnap2/nSyb/CanB2/Rab3/Exo84/Syx6/nej/DCAF12/Rep/Sec10/Tbh/veli/Rab3-GAP/HDAC6/Gdi/rogdi/Dys/Rab3GAP1/Hsc70-4/Sec5/Syx17/cpx/Syt1/Cadps/Mctp/Syx8/ChAT/mop/DCTN1-p150/Rph/stmA/speck/Sec6/stac/Rab3-GEF/Arl1/Snap25/Cdc42/SH3PX1/Sec8/Arl2
GO:BP	response to endoplasmic reticulum stress	GO:0034976	52/3338	88/12653	9.0448e-11	2.10615e-09	1.12966e-09	Calr/Cnx99A/shep/TER94/Marf/CaBP1/CG9003/Pdi/CG1317/ERp60/Xbp1/ReepA/Der-2/Cat/CG9005/Der-1/Ufl1/sordd1/alpha-Man-Ib/Herp/Ufd1/crc/meigo/sordd2/Ube4A/Egm/CG33298/Ire1/Edem1/CG8405/eIF2beta/sip3/Gp93/CG32276/Fic/Trc8/Rpt4/CG11594/Uggt/CG6766/CG15814/Mekk1/PPP1R15/CG8042/CG5823/S2P/PEK/Atf6/Cbs/Edem2/Ubc7/Faf2
GO:BP	positive regulation of cell projection organization	GO:0031346	46/3338	74/12653	9.80218e-11	2.26454e-09	1.21461e-09	pico/atl/SCAR/AMPKalpha/ena/sif/nudC/Rheb/Abl/GM130/nudE/Rop/S6k/stan/G9a/Naus/LRR/raptor/Akt/Sec23/hep/Arp3/Sar1/PsGEF/Rab35/mmy/Flo2/Vang/DAAM/Wnt5/HSPC300/dsh/aPKC/Rab1/DCTN1-p150/TBPH/PlexB/Tor/Abi/Rac1/psidin/twf/lva/spas/Cdc42/cpa
GO:BP	regulation of proteolysis involved in cellular protein catabolic process	GO:1903050	48/3338	79/12653	1.22089e-10	2.79851e-09	1.50101e-09	Cul1/TER94/UbcE2H/Xbp1/ari-1/Usp2/Usp47/dco/fzr/Usp5/Ufl1/EloB/sordd1/scny/sgg/Axn/DUBAI/slmb/Ufd1/Ubc6/poe/ebi/CG8209/CG8405/sip3/Usp14/Rnf146/CSN5/CG31855/CG9951/SkpA/STUB1/Cul2/Ufd4/muskelin/Roc1a/CkIalpha/eIF3h/REG/POSH/Tor/RanBPM/Kcmf1/CkIIalpha/wds/Sou/rpr/Tnks
GO:BP	organophosphate metabolic process	GO:0019637	169/3338	418/12653	1.45734e-10	3.31461e-09	1.77783e-09	Gapdh1/Pfk/Ac3/Hex-A/Ald1/Pde11/Cmpk/Acsl/CG6330/PyK/Eno/sp3/AMPdeam/elm/Sac1/blw/AdSS/Pcyt2/ATPsyngamma/CG2201/Synj/Pgi/ATPsynbeta/Pdhb/l(1)G0196/frj/Tpi/CG1309/Hmgs/CG8891/Scox/Taz/CG15111/Gapdh2/Mdh1/Ipp/Gpo1/CG14411/Pect/rdgB/ATPsynF/Aps/Sik3/nes/ScsbetaG/INPP5E/Vap33/fwd/Ttc7/bbc/Men/wun/PIG-T/Nmnat/CG42813/Ak1/ATPsynD/Pcyt1/CLS/Dd/CG9391/Pgk/Pdha/Adk2/GAA1/ATPsynCF6/CG7990/sun/Serinc/Papss/…
GO:BP	regulation of cellular component size	GO:0032535	85/3338	174/12653	1.49184e-10	3.36698e-09	1.80592e-09	Arpc3A/Kank/Ras85D/nwk/CadN/pico/atl/tmod/RhoGAPp190/shi/kcc/svr/spoon/AMPKalpha/dco/mbt/dop/Madm/Liprin-alpha/Rheb/Cip4/p38b/Abl/S6k/stan/Atx2/drk/Sema2a/gek/Lam/LRR/raptor/Arpc5/MAPk-Ak2/Hs3st-B/CG31715/RhoGAP1A/Cad96Ca/rl/Ythdf/Akt/Arpc2/Ssrp/PsGEF/chico/Fmr1/Vang/Cortactin/Vrp1/RhoGAP92B/DAAM/Src64B/Sema1a/Wnt5/Pi3K92E/RasGAP1/HSPC300/CG10413/dsh/Pdk1/Sema1b/Arpc4/Alk/Mekk1/cpb/Tor/Rac1/mv/Pe…
GO:BP	axon guidance	GO:0007411	115/3338	258/12653	1.51663e-10	3.39678e-09	1.8219e-09	sm/sli/CadN/dpr11/Acsl/SCAR/robo3/dally/beat-Ib/Sac1/Vav/fz2/Khc/uzip/beat-Ic/RhoGAP93B/Ptp10D/AMPKalpha/ena/capt/side/Fas3/CadN2/chb/Nedd4/Liprin-alpha/SelR/jeb/Rheb/beat-IIIb/Abl/beta-Spec/Sdc/Dad/Ptp4E/S6k/stan/fra/pod1/hts/Nrt/Sema2a/meigo/raptor/msps/Unc-115a/Ptp61F/bur/Rho1/hep/alpha-Spec/beat-Ia/nvy/Dg/haf/eIF2beta/mmy/Fmr1/Vang/tutl/Dscam3/gogo/Cont/DAAM/Src64B/ttv/Mau2/Sema1a/Wnt5/DIP2/H…
GO:BP	regulation of proteasomal protein catabolic process	GO:0061136	43/3338	68/12653	1.80066e-10	4.00238e-09	2.14672e-09	Cul1/TER94/UbcE2H/Xbp1/ari-1/Usp2/Usp47/dco/fzr/Usp5/Ufl1/EloB/scny/sgg/Axn/slmb/Ufd1/Ubc6/poe/ebi/CG8209/CG8405/Usp14/Rnf146/CSN5/CG31855/SkpA/STUB1/Cul2/Ufd4/muskelin/Roc1a/CkIalpha/eIF3h/REG/POSH/Tor/RanBPM/Kcmf1/CkIIalpha/wds/Sou/Tnks
GO:BP	RNA splicing	GO:0008380	134/3338	314/12653	1.83317e-10	4.0388e-09	2.16626e-09	mbl/sm/CG8565/su(w[a])/Prp18/Cbp20/SmB/CG6999/lost/Pabp2/Cdc27/CG30122/Hrb87F/Sf3b5/Srpk79D/HnRNP-K/x16/Sxl/CG4887/CG4119/CG14641/Ars2/l(1)10Bb/ytr/Cdc2rk/CG11360/snf/snRNP-U1-70K/Parp/nonA/Doa/Bx42/Srp54/caz/Acn/qkr58E-1/snRNP-U1-C/SmD2/U2af38/qkr58E-2/Smn/CG3436/rig/Prp39/c12.1/Mtr4/SRPK/SF1/Prp38/Ire1/mod/barc/Prp31/CG11586/cyp33/SF2/ncm/CG7483/Cpsf6/Psi/CG2926/CG31249/CG17187/Hsc70-4/LSm7/Moc…
GO:BP	smoothened signaling pathway	GO:0007224	56/3338	99/12653	1.84458e-10	4.0388e-09	2.16626e-09	tws/Usp7/Cul1/TER94/flw/PPP4R2r/dally/Sac1/Npl4/Synj/dco/Herc4/rdx/Nedd4/Sxl/Ulp1/Nedd8/CG14182/sgg/Ubr3/pic/Tnpo/slmb/Ufd1/C3G/Cul3/bur/Pp2A-29B/nej/disp/Su(dx)/Cul4/ttv/Su(fu)/cos/hyx/sqh/lwr/Su(var)2-10/UbcE2M/aPKC/Rpn13/Roc1a/CkIalpha/Uch-L5/Hrs/krz/apolpp/trol/Pp1alpha-96A/Gprk1/Pp4-19C/Sulf1/Gug/CkIIalpha/tow
GO:BP	regulation of hydrolase activity	GO:0051336	92/3338	194/12653	2.0028e-10	4.35275e-09	2.33465e-09	CG1695/RapGAP1/tbc/Evi5/Vav/Cp1/Dhit/RhoGAP19D/hbs/RhoGAP93B/CG9578/RSG7/ArfGAP1/CG34393/IKKepsilon/sif/garz/Rlip/Asap/GAPcenA/Cyt-c-p/ArfGAP3/drongo/Nf1/RtGEF/Dd/vimar/vap/CG5916/brun/spg/CG34408/C3G/26-29-p/HtrA2/CG42795/CG5521/RN-tre/RhoGAP1A/TBC1D16/CG7369/I-2/Cul3/Mon1/CG8155/CG3703/Sec23/Ziz/Tbc1d8-9/CenG1A/pen-2/SIDL/ScsbetaA/PolZ2/endos/RhoGAP92B/Jafrac2/CG17883/Rab3-GAP/CG17019/Gapvd1/CG…
GO:BP	RNA splicing, via transesterification reactions	GO:0000375	126/3338	291/12653	2.08248e-10	4.42754e-09	2.37476e-09	mbl/CG8565/su(w[a])/Prp18/Cbp20/SmB/CG6999/lost/Pabp2/Cdc27/CG30122/Hrb87F/Sf3b5/Srpk79D/HnRNP-K/x16/Sxl/CG4887/CG4119/CG14641/Ars2/l(1)10Bb/ytr/Cdc2rk/CG11360/snf/snRNP-U1-70K/nonA/Doa/Bx42/Srp54/caz/Acn/qkr58E-1/snRNP-U1-C/SmD2/U2af38/qkr58E-2/Smn/CG3436/rig/Prp39/c12.1/Mtr4/SRPK/SF1/Prp38/mod/barc/Prp31/CG11586/cyp33/SF2/ncm/CG7483/Cpsf6/Psi/CG2926/CG17187/Hsc70-4/LSm7/Moca-cyp/Sf3b2/hfp/CG427…
GO:BP	RNA splicing, via transesterification reactions with bulged adenosine as nucleophile	GO:0000377	126/3338	291/12653	2.08248e-10	4.42754e-09	2.37476e-09	mbl/CG8565/su(w[a])/Prp18/Cbp20/SmB/CG6999/lost/Pabp2/Cdc27/CG30122/Hrb87F/Sf3b5/Srpk79D/HnRNP-K/x16/Sxl/CG4887/CG4119/CG14641/Ars2/l(1)10Bb/ytr/Cdc2rk/CG11360/snf/snRNP-U1-70K/nonA/Doa/Bx42/Srp54/caz/Acn/qkr58E-1/snRNP-U1-C/SmD2/U2af38/qkr58E-2/Smn/CG3436/rig/Prp39/c12.1/Mtr4/SRPK/SF1/Prp38/mod/barc/Prp31/CG11586/cyp33/SF2/ncm/CG7483/Cpsf6/Psi/CG2926/CG17187/Hsc70-4/LSm7/Moca-cyp/Sf3b2/hfp/CG427…
GO:BP	mRNA splicing, via spliceosome	GO:0000398	126/3338	291/12653	2.08248e-10	4.42754e-09	2.37476e-09	mbl/CG8565/su(w[a])/Prp18/Cbp20/SmB/CG6999/lost/Pabp2/Cdc27/CG30122/Hrb87F/Sf3b5/Srpk79D/HnRNP-K/x16/Sxl/CG4887/CG4119/CG14641/Ars2/l(1)10Bb/ytr/Cdc2rk/CG11360/snf/snRNP-U1-70K/nonA/Doa/Bx42/Srp54/caz/Acn/qkr58E-1/snRNP-U1-C/SmD2/U2af38/qkr58E-2/Smn/CG3436/rig/Prp39/c12.1/Mtr4/SRPK/SF1/Prp38/mod/barc/Prp31/CG11586/cyp33/SF2/ncm/CG7483/Cpsf6/Psi/CG2926/CG17187/Hsc70-4/LSm7/Moca-cyp/Sf3b2/hfp/CG427…
GO:BP	neuron recognition	GO:0008038	63/3338	117/12653	2.28844e-10	4.83041e-09	2.59085e-09	hig/sli/CadN/SCAR/robo3/RhoGAPp190/Sac1/fz2/uzip/beat-Ic/RhoGAP93B/CG5758/dsd/Fas3/Nedd4/CG32373/Abl/beta-Spec/Nrx-IV/stan/bchs/fra/Nrt/CG8668/Sema2a/Npc2a/gek/fry/Rho1/Arp3/alpha-Spec/beat-Ia/eIF2beta/mmy/p130CAS/Fmr1/Vang/tutl/Dscam3/nrm/Cont/Sema1a/dpr12/Hsc70-4/trc/dsh/mew/Trim9/PlexB/Fur1/Rac1/trol/Ptp69D/Sulf1/loaf/Dscam2/Galphaq/robo2/Bsg/Con/Drl-2/esn/Ptp99A
GO:BP	positive regulation of protein catabolic process	GO:0045732	45/3338	73/12653	2.34101e-10	4.90609e-09	2.63144e-09	Cul1/TER94/UbcE2H/Xbp1/ari-1/Usp2/dco/rdx/Nedd4/fzr/Usp5/EloB/scny/sgg/Axn/pic/slmb/Ufd1/Ubc6/RabX1/Socs36E/poe/Lon/ebi/CG8405/Apc/Rnf146/Fsn/CSN5/CG31855/Cul4/SkpA/STUB1/Cul2/Ufd4/muskelin/Roc1a/CkIalpha/POSH/RanBPM/Kcmf1/wds/Sou/Tnks/Oda
GO:BP	negative regulation of intracellular signal transduction	GO:1902532	68/3338	130/12653	2.4255e-10	5.04711e-09	2.70708e-09	RapGAP1/mnb/Usp7/HUWE1/Cul1/CG2918/Atg1/flw/Sac1/Mnn1/Patronin/AMPKalpha/Herc4/Sik3/Usp5/raw/Rheb/p38b/sgg/CG6180/ATPsynD/Prosap/par-1/slmb/vap/LRR/Ubc6/poe/wrd/Ptp61F/Pp2A-29B/Akt/ebi/pn/Su(dx)/alph/fmt/Cbl/Urm1/SkpA/Ack/puc/aPKC/Sik2/Mekk1/Ufd4/CkIalpha/wap/cpb/Atg9/krz/POSH/raskol/Pten/Kcmf1/sty/Spred/Mnat9/RhoGAP5A/jub/PTP-ER/CG15547/Atg18a/Strip/cpa/PRAS40/cv-c/JMJD6
GO:BP	negative regulation of cellular component organization	GO:0051129	80/3338	162/12653	2.64961e-10	5.47462e-09	2.93638e-09	plum/Kank/nwk/baz/CadN/tmod/Tango9/Patronin/spoon/ArfGAP1/ena/dbo/stj/Cip4/Abl/beta-Spec/sgg/Dad/Pink1/Mob2/Fak/Efa6/Nf1/Sema2a/Tao/fry/LRR/raptor/Kr-h1/RhoGAP68F/CG31715/Ythdf/Akt/alpha-Spec/Liprin-gamma/Mad1/Fmr1/Apc/Sps1/Fsn/RhoGAP92B/mask/Src64B/Sema1a/Rae1/trc/SkpA/CG15237/Rab39/lwr/Sema1b/Mekk1/pds5/cpb/tacc/Patr-1/TBPH/Rac1/mv/Pten/Mi-2/hiw/twf/Bub1/Spn/Svil/Mnat9/sesB/Zw10/4E-T/RhoGAP5A/V…
GO:BP	organophosphate biosynthetic process	GO:0090407	113/3338	256/12653	4.49157e-10	9.21557e-09	4.94288e-09	Ac3/Cmpk/Acsl/AMPdeam/elm/blw/AdSS/Pcyt2/ATPsyngamma/CG2201/ATPsynbeta/Pdhb/l(1)G0196/frj/Tpi/Hmgs/Scox/Taz/Ipp/Pect/ATPsynF/nes/fwd/Ttc7/bbc/PIG-T/Nmnat/Ak1/ATPsynD/Pcyt1/CLS/Dd/CG9391/Pdha/Adk2/GAA1/ATPsynCF6/CG7990/sun/Papss/Socs36E/PIG-G/bur/fbl/PIG-L/Gycbeta100B/CG31183/Dpm3/muc/Hyccin/ATPCL/CG14721/PIG-F/Nadsyn/CG11035/CG33156/Ac76E/Socs16D/Mppe/Dhod/Uba4/PGAP5/Pi3K92E/DIP2/Gyc89Da/Gk2/dnk/…
GO:BP	regulation of nervous system development	GO:0051960	101/3338	222/12653	4.98189e-10	1.01506e-08	5.44439e-09	Dap160/plum/mnb/Actbeta/nwk/tws/CadN/Octbeta2R/atl/hdc/Ctr9/ari-1/ena/aop/unk/sif/Nedd4/Pak3/dbo/nudC/stj/Rheb/Cip4/Abl/GM130/nudE/sgg/Sdc/Dad/Mob2/stan/Fak/Arp2/G9a/caz/Nf1/Sema2a/stau/Tao/slmb/raptor/RhoGAP68F/Smn/Hs3st-B/Ythdf/Akt/MAGE/Sec23/Arp3/wit/Sar1/osa/Liprin-gamma/Mad/barc/Fmr1/simj/Vang/Fsn/RhoGAP92B/Synd/Src64B/Sema1a/Wnt5/Rae1/Pi3K92E/mor/Cdc37/SkpA/nmo/Rcc1/dsh/Arfip/aPKC/Rab1/Sema…
GO:BP	regulation of vesicle-mediated transport	GO:0060627	71/3338	140/12653	5.97871e-10	1.20976e-08	6.48869e-09	mnb/CASK/prtp/sp3/CaBP1/gzl/Syt4/Pkc53E/lap/Syx7/Csp/Vps29/Rab11/ArfGAP1/drpr/cindr/Septin4/aux/garz/Nedd4/Nak/Graf/Syx18/BicD/hob/drk/Tao/NFAT/vap/nSyb/RhoGAP68F/Vps35/tweek/Rab3/PGAP1/Blos1/CG6454/Rab4/Nrx-1/O-fut1/crq/Cortactin/Synd/Sec71/Cbl/Rab3GAP1/Sec5/Moe/PICK1/Rab5/Crag/step/Syt1/Cadps/AP-2alpha/Rab8/Rab7/nsl1/mop/ClC-b/Rph/krz/jar/mv/Uvrag/Rme-8/brat/Arl1/Septin1/Pi3K59F/CG8507
GO:BP	aerobic respiration	GO:0009060	66/3338	127/12653	6.37037e-10	1.28018e-08	6.86641e-09	SdhA/Cyt-c1/ND-B14.5B/CG5214/Chchd2/ND-75/CG14757/ND-B14.5A/cype/UQCR-6.4/ATPsynbeta/SdhB/SdhC/mAcon1/Mdh1/bsf/ND-B22/Idh3b/ATPsynF/CG9005/SdhD/Ogdh/ScsbetaG/ND-51/CG42376/Idh3a/Cyt-c-p/COX4/UQCR-Q/ND-42/Pink1/ND-20/RFeSP/Tspo/levy/ND-49/COX5A/dj-1beta/ND-B17.2/Nipsnap/sun/ND-B17/ND-19/Scsalpha1/ND-ASHI/Mdh2/ScsbetaA/COX5B/ATPCL/CG11035/COX7A/Fum1/UQCR-C2/kdn/CG7630/Irp-1B/ATPsynbetaL/srl/CG12895…
GO:BP	programmed cell death	GO:0012501	141/3338	340/12653	6.66593e-10	1.33046e-08	7.1361e-09	mbl/trus/Coa8/Ras85D/E2f1/cathD/Cul1/CG2918/Atg1/TER94/Drep4/hdc/futsch/pnut/shi/Tango9/Cp1/Nf-YB/Uba1/MED24/CG14130/Dp/drpr/alpha4GT1/sigmar/tub/dco/Idh3b/rdx/Lkb1/Raf/Usp5/RYBP/Der-1/scny/arm/zda/dmt/Bruce/CG9922/Pink1/wun/Clbn/Den1/Tspo/Ubr3/Hsp60A/pix/lncRNA:Hsromega/Drak/CG10209/Tao/DUBAI/CG9231/slmb/l(3)psg2/CG4238/lsn/Atg17/raptor/Drep1/SCCRO3/Met/26-29-p/Ubc6/Prx3/HtrA2/Sirt1/msk/Aatf/wrd…
GO:BP	actin filament organization	GO:0007015	82/3338	170/12653	6.87335e-10	1.35345e-08	7.25939e-09	Arpc3A/Kank/Msp300/nwk/capu/pico/ALiX/SCAR/tmod/shi/Khc/svr/spoon/ena/dco/IKKepsilon/capt/cindr/Pak3/SelR/Cip4/p38b/Abl/Hip1/cib/Actn/Atx2/hts/Arp2/Naus/gek/Lam/LRR/Arpc5/RhoGAP68F/Smn/CG31715/Tm1/Arpc2/Rho1/Myo95E/Ret/hep/Arp3/Ssrp/PsGEF/p130CAS/Cortactin/Vrp1/RhoGAP92B/DAAM/Src64B/cdi/HSPC300/PICK1/dsh/Arfip/mew/Arpc4/cpb/sn/jar/Nup154/Abi/Rac1/psidin/CAP/twf/Strump/Act88F/l(3)05822/sced/Spn/Sv…
GO:BP	regulation of cellular localization	GO:0060341	82/3338	170/12653	6.87335e-10	1.35345e-08	7.25939e-09	Cnx99A/TER94/sp3/Evi5/dally/Khc/prd1/Rab11/enc/Herc4/DCTN2-p50/rdx/Su(var)205/Asap/Abl/sgg/Rop/SrpRalpha/Parp/tral/Tom7/stau/par-1/Klp64D/Lam/RhoGAP68F/AdipoR/Fam92/Vps35/Ran/swm/PGAP1/Ptp61F/CG6454/Sar1/Rep/Rab35/Flo2/CG13920/Apc/S/RhoGAP92B/Su(dx)/Gapvd1/wls/Su(fu)/spn-F/Moe/PICK1/Akap200/Ttd14/Crag/Ptpa/Syt1/Rcc1/ZC3H3/aPKC/mago/Rab1/BORCS5/Rab7/aub/CG14020/mop/ReepB/Hrs/jar/ScpX/Nup154/RanBPM…
GO:BP	cell recognition	GO:0008037	64/3338	122/12653	6.96391e-10	1.36214e-08	7.306e-09	hig/sli/CadN/SCAR/robo3/RhoGAPp190/Sac1/fz2/uzip/beat-Ic/RhoGAP93B/CG5758/dsd/Fas3/Nedd4/CG32373/Abl/beta-Spec/Nrx-IV/stan/bchs/fra/Nrt/CG8668/Sema2a/Npc2a/gek/fry/Mcr/Rho1/Arp3/alpha-Spec/beat-Ia/eIF2beta/mmy/p130CAS/Fmr1/Vang/tutl/Dscam3/nrm/Cont/Sema1a/dpr12/Hsc70-4/trc/dsh/mew/Trim9/PlexB/Fur1/Rac1/trol/Ptp69D/Sulf1/loaf/Dscam2/Galphaq/robo2/Bsg/Con/Drl-2/esn/Ptp99A
GO:BP	regulation of supramolecular fiber organization	GO:1902903	62/3338	117/12653	7.51825e-10	1.46083e-08	7.83533e-09	Arpc3A/Kank/nwk/atl/SCAR/tmod/futsch/shi/svr/Patronin/spoon/dco/chb/Nedd4/Cip4/p38b/Abl/beta-Spec/Efa6/Atx2/Naus/gek/Lam/LRR/Arpc5/RhoGAP68F/cnn/CG31715/msps/Arpc2/hep/Ssrp/alpha-Spec/PsGEF/Apc/Cortactin/Vrp1/RhoGAP92B/DAAM/Src64B/HSPC300/PICK1/Ggamma1/dsh/Arfip/Arpc4/cpb/tacc/smog/Abi/mv/twf/Strump/Svil/Mnat9/mys/Vhl/spas/Gel/Cdc42/cpa/Nup98-96
GO:BP	respiratory system development	GO:0060541	113/3338	258/12653	7.89257e-10	1.52347e-08	8.17133e-09	sli/Rbcn-3A/Ras85D/Vha26/baz/TSG101/Dlic/dally/Sac1/hdc/bnl/Vav/Atpalpha/zip/Hs6st/Sec24CD/Ccm3/shi/sima/Ptp10D/ct/aop/trh/CCT3/IKKepsilon/Hr78/garz/Raf/deltaCOP/Nsf2/arm/Rheb/dmt/Sdc/Nrx-IV/Ptp4E/wun/stan/Stat92E/Stam/gammaCOP/VhaAC39-1/drk/Lam/noc/Mcr/Smn/rl/Dhc64C/kkv/Akt/Rho1/Sec23/sfl/Dsor1/chico/Rab35/Blimp-1/mmy/Vha100-1/DAAM/dome/Src64B/csw/vari/Sec5/Moe/pasi1/Hph/bs/hid/wkd/VhaPPA1-1/sqh…
GO:BP	protein phosphorylation	GO:0006468	141/3338	341/12653	8.45478e-10	1.62133e-08	8.69618e-09	CG8565/CG31145/Dap160/mnb/CASK/Actbeta/Atg1/Dyrk3/Eip63E/bnl/Ccm3/Pkc53E/shi/SNF4Agamma/CG4629/CG9098/CG32944/svr/PKD/sff/AMPKalpha/Nuak/dco/mbt/IKKepsilon/Srpk79D/dop/CG17528/S6KL/aux/Cdk12/Sik3/Lkb1/Pak3/Raf/Madm/Lk6/Dyrk2/bon/p38b/slpr/CG14408/Nak/Wee1/Abl/Cdc2rk/Hexim/sgg/Dad/PhKgamma/Pink1/S6k/Mob2/Fak/Doa/Axn/Drak/Eph/Tao/par-1/gek/Atg17/fry/raptor/MAPk-Ak2/Cad96Ca/Wnk/rl/CG30291/Akt/SRPK/R…
GO:BP	establishment of protein localization to membrane	GO:0090150	59/3338	110/12653	1.03883e-09	1.97918e-08	1.06156e-08	Trp1/comt/CG2918/GABPI/boca/Sgt/Rab11/CG1598/Sec61beta/CG31229/EMC8-9/EMC1/Nsf2/Srp19/Sec61alpha/OXA1L/CG7639/SrpRalpha/CG8860/Tom7/sau/nmd/Vps26/Tom70/Vps35/CG10674/CG6454/EMC6/Tim9a/Pex19/CG1407/Rab35/Vps37B/Srp14/Srp9/Srp68/Tim8/Srp72/Dnz1/Srp54k/Arfrp1/Sec71/wls/Rab3GAP1/Sec5/Sec63/EMC4/Crag/mge/CG32022/Vsp37A/Pex3/CG5885/Sec6/CG5447/CG4942/EMC3/CG9853/cora
GO:BP	regulation of response to stress	GO:0080134	147/3338	360/12653	1.04597e-09	1.97993e-08	1.06196e-08	Cbp53E/Trap1/HUWE1/Cul1/CG2918/ALiX/atl/flw/PPP4R2r/TM9SF2/DMAP1/Sac1/bnl/SP2353/Lpin/EMRE/Mnn1/Csp/sima/ben/Usp2/drpr/sigmar/tub/GlyP/IKKepsilon/Herc4/rdx/Hr78/Lkb1/Usp5/Ulp1/raw/scny/puf/p38b/slpr/GstO2/sgg/hyd/wun/Clbn/Ntf-2/Stat92E/Parp/lncRNA:Hsromega/Doa/emb/Npc2a/key/MED6/slmb/crc/Ubc6/MAPk-Ak2/CG11474/Cad96Ca/senju/rl/Ptp61F/Akt/Egm/Ubc4/Rho1/Pli/hep/Pkn/ebi/CG8405/AIMP3/PDCD-5/Sarm/betaC…
GO:BP	axo-dendritic transport	GO:0008088	32/3338	46/12653	1.08514e-09	2.04089e-08	1.09466e-08	Atg1/Dlic/Marf/Sac1/futsch/Arl8/Khc/Dlc90F/milt/DCTN2-p50/Liprin-alpha/Vap33/Kap3/Kif3C/stau/Klp64D/Dhc64C/ATP6AP2/Arp10/Fmr1/Apc/Klp68D/Sec5/syd/Arp1/sw/Aplip1/Rab1/BORCS5/DCTN5-p25/DCTN1-p150/Miro
GO:BP	Ras protein signal transduction	GO:0007265	74/3338	150/12653	1.30515e-09	2.43905e-08	1.30821e-08	RhoGEF3/Ras85D/siz/RhoGAPp190/CG18659/CG9098/14-3-3zeta/Uba1/RhoGAP19D/Rab11/ArfGAP1/Sur-8/CG34393/garz/Raf/Rlip/Ras64B/RabX4/Cdep/Graf/Efa6/drk/Nf1/vap/C3G/RhoGAP68F/RhoGAP1A/Rab3/RabX1/CG7369/CRMP/Ziz/Rab4/PsGEF/Fnta/Rab18/Rab35/Rab30/RhoGAP92B/Gapvd1/alph/CG6607/Sec71/Rab3GAP1/pns/alpha-Catr/Rab5/RhoBTB/Crag/step/Sbf/Rab39/Hmgcr/Rab6/Rab1/Rab8/Rab7/Rab10/cnk/CG4853/raskol/CG42674/Rab21/sty/Rab…
GO:BP	regulation of plasma membrane bounded cell projection organization	GO:0120035	78/3338	161/12653	1.38034e-09	2.56325e-08	1.37483e-08	Hasp/baz/CadN/pico/HUWE1/atl/Dlic/SCAR/RhoGAPp190/fz2/AMPKalpha/ena/sif/Nedd4/C1GalTA/Pak3/nudC/Rheb/Abl/GM130/nudE/Rop/S6k/stan/fra/Arp2/G9a/Sema2a/Naus/fry/LRR/raptor/Kr-h1/Tm1/Ythdf/Akt/Rho1/Sec23/Ret/hep/Arp3/Sar1/PsGEF/Rab35/mmy/Flo2/Fmr1/Vang/tutl/DAAM/Sema1a/Wnt5/Pi3K92E/HSPC300/trc/vvl/LIMK1/dsh/aPKC/Rab1/Sema1b/cpb/DCTN1-p150/Trim9/TBPH/PlexB/Tor/Abi/Rac1/psidin/Pten/twf/lva/spas/Cdc42/b…
GO:BP	viral life cycle	GO:0019058	29/3338	40/12653	1.40975e-09	2.60138e-08	1.39528e-08	TER94/TSG101/Cbp20/shrb/shi/Vps29/Rab11/AGO2/Sec61alpha/Mvb12/Ars2/AP-1-2beta/sau/Mvl/Rab3/Sar1/Sec10/Rab35/Vps4/Rab30/betaCOP/Rab5/Rab1/Cbp80/Rab8/Rab7/Rab10/Sec8/Jra
GO:BP	synaptic vesicle endocytosis	GO:0048488	28/3338	38/12653	1.47646e-09	2.69063e-08	1.44315e-08	Dap160/mnb/CASK/Nlg4/shi/lap/Synj/Vps29/Rab11/Eps-15/stj/EndoA/BicD/Nlg2/Vps35/tweek/Nrx-1/spin/Rab5/Syt1/AP-2alpha/stmA/Dab/twf/Nlg3/brat/Arl1/Arl2
GO:BP	presynaptic endocytosis	GO:0140238	28/3338	38/12653	1.47646e-09	2.69063e-08	1.44315e-08	Dap160/mnb/CASK/Nlg4/shi/lap/Synj/Vps29/Rab11/Eps-15/stj/EndoA/BicD/Nlg2/Vps35/tweek/Nrx-1/spin/Rab5/Syt1/AP-2alpha/stmA/Dab/twf/Nlg3/brat/Arl1/Arl2
GO:BP	glycerophospholipid metabolic process	GO:0006650	61/3338	116/12653	1.53494e-09	2.77995e-08	1.49106e-08	Acsl/sp3/Sac1/Pcyt2/CG2201/Synj/frj/CG1309/Taz/CG15111/Ipp/CG14411/Pect/rdgB/nes/INPP5E/Vap33/fwd/Ttc7/bbc/PIG-T/Pcyt1/CLS/CG9391/GAA1/CG7990/Serinc/Socs36E/PGAP1/PIG-G/5PtaseI/PIG-L/Dpm3/CG2818/Ocrl/Hyccin/PIG-F/FIG4/Socs16D/Mppe/PGAP5/Pi3K92E/CG6805/PGS1/CG6707/Agpat1/PIG-K/PIG-S/PIG-Q/puml/CG18135/PIP5K59B/Pten/Cds/CG7149/rdgA/Pi3K21B/CG33116/CG7789/Pi3K59F/CG15743
GO:BP	regulation of protein stability	GO:0031647	39/3338	62/12653	1.58764e-09	2.85775e-08	1.53279e-08	Cnx99A/tws/Usp7/CG7945/CSN7/14-3-3zeta/Usp47/rdx/Snx3/Sxl/Ulp1/Nedd8/puf/Abl/CG9922/orb2/alien/trsn/Vps35/Ptp61F/CSN6/Rnf146/CSN5/da/ric8a/Sin3A/syd/Cdc37/CG8206/SkpA/lwr/Cand1/krz/Pten/CSN3/CkIIalpha/CSN1b/CG12379/CSN8
GO:BP	electron transport chain	GO:0022900	51/3338	91/12653	1.85197e-09	3.31322e-08	1.77708e-08	SdhA/Cyt-c1/ND-B14.5B/GC1/Chchd2/ND-75/CG14757/blw/ND-B14.5A/cype/UQCR-6.4/SdhB/SdhC/Gpo1/ND-B22/SdhD/ND-51/CG42376/Cyt-c-p/COX4/UQCR-Q/ND-42/Pink1/RFeSP/levy/ND-49/COX5A/dj-1beta/ND-13B/ND-18/ND-B17.2/ND-B17/CG6115/ND-19/ND-ASHI/COX5B/COX7A/UQCR-C2/Invadolysin/ND-B12/CG7630/Fdx1/CG12895/Etf-QO/ND-13A/ND-24/UQCR-11/COX8/aralar1/Fdx2/ND-23
GO:BP	morphogenesis of follicular epithelium	GO:0016333	34/3338	51/12653	1.89308e-09	3.36625e-08	1.80553e-08	loco/orb/CSN7/rin/spoon/Dp/Raf/Cip4/sds22/lig/alien/Parp/slmb/Grasp65/CSN6/Dg/CSN5/Src64B/Cbl/csw/Cul2/aPKC/brn/jar/Patj/Abi/sty/Mettl3/CSN3/awd/CSN1b/Vhl/Sce/Scm
GO:BP	regulation of cellular response to stress	GO:0080135	65/3338	127/12653	1.94591e-09	3.43934e-08	1.84473e-08	HUWE1/CG2918/ALiX/atl/flw/Sac1/Lpin/Mnn1/ben/sigmar/rdx/Lkb1/Usp5/raw/puf/p38b/slpr/sgg/hyd/Clbn/lncRNA:Hsromega/emb/crc/Ubc6/MAPk-Ak2/CG11474/Ptp61F/Akt/Egm/ebi/CG8405/AIMP3/Blm/alph/Traf6/fmt/spn-A/Urm1/syd/SkpA/Aplip1/Fer2/Alg-2/puc/Mekk1/cpb/slim/Atg9/CG2921/Rev1/POSH/Rac1/Pten/XNP/Mnat9/S2P/PEK/Vhl/spas/Cdc42/CG15547/Strip/rpr/cpa/JMJD6
GO:BP	protein-containing complex disassembly	GO:0032984	48/3338	84/12653	2.29762e-09	4.03665e-08	2.1651e-08	comt/TER94/atl/tmod/futsch/Khc/alphaSnap/Patronin/eRF3/Usp5/CG6094/Nsf2/stj/beta-Spec/EndoA/car/pix/LRR/Vps28/CG31715/Vps16A/CG8155/alpha-Spec/Apc/Vps4/Vamp7/Vha100-1/ema/mRF1/eRF1/CG17187/Klp10A/Syx17/Sbf/Rab39/cpb/tacc/pea/psidin/Rab21/twf/Mitf/Svil/Mnat9/Vhl/spas/Gel/cpa
GO:BP	regulation of cytoskeleton organization	GO:0051493	80/3338	168/12653	2.36815e-09	4.1358e-08	2.21828e-08	Arpc3A/Kank/nwk/atl/SCAR/tmod/futsch/Vav/shi/svr/Patronin/spoon/ena/sigmar/dco/IKKepsilon/chb/Nedd4/Cip4/p38b/Abl/beta-Spec/sgg/Efa6/BicD/Atx2/Naus/gek/Lam/LRR/Arpc5/RhoGAP68F/cnn/CG31715/msps/Arpc2/Rho1/hep/Ssrp/alpha-Spec/PsGEF/Ocrl/Apc/Cortactin/Vrp1/RhoGAP92B/Eb1/DAAM/Src64B/lilli/Moe/HSPC300/PICK1/Akap200/step/Ggamma1/sqh/dsh/Arfip/Arpc4/cpb/tacc/jar/smog/TBPH/Abi/Rac1/mv/twf/Strump/Svil/Mna…
GO:BP	regulation of programmed cell death	GO:0043067	103/3338	233/12653	2.39457e-09	4.1572e-08	2.22976e-08	Ras85D/E2f1/Cul1/CG2918/Atg1/TER94/futsch/pnut/Tango9/Cp1/Nf-YB/Uba1/MED24/Dp/alpha4GT1/sigmar/dco/Idh3b/rdx/Lkb1/Raf/Usp5/RYBP/Der-1/scny/zda/dmt/Bruce/CG9922/Pink1/Clbn/Den1/Tspo/Ubr3/pix/lncRNA:Hsromega/Drak/DUBAI/CG9231/slmb/l(3)psg2/CG4238/lsn/Drep1/SCCRO3/Met/26-29-p/Ubc6/Prx3/HtrA2/Sirt1/msk/Aatf/wrd/Akt/MAGE/DCAF12/CG32202/ebi/Mdh2/Fmr1/Apc/gce/PDCD-5/Naa20A/CG17019/Cbl/cos/spin/Diap2/syd…
GO:BP	mitotic cell cycle	GO:0000278	190/3338	498/12653	2.98815e-09	5.1572e-08	2.76612e-08	E2f1/tws/Wdr62/TER94/ALiX/PPP4R2r/Dlic/gammaTub23C/Eip63E/shrb/zip/pnut/shi/luna/alphaSnap/Syx13/14-3-3zeta/Dlc90F/Mnn1/Patronin/ben/Cdc27/Map205/alphaTub84D/Dp/Hrb87F/AMPKalpha/DCTN2-p50/chb/Lkb1/fzr/Su(var)205/Asap/Rheb/dmt/Wee1/Cdc2rk/nudE/cal1/sgg/Sap30/PhKgamma/CCT6/sau/slmb/Lam/SmD2/Rpn10/cnn/Smr/msps/CG3436/DCTN6-p27/Ran/rl/Dhc64C/Aven/Capr/CG30291/Ptp61F/fbl/Pc/nej/Rho1/Su(var)2-HP2/CG316…
GO:BP	homeostatic process	GO:0042592	179/3338	464/12653	3.28576e-09	5.63767e-08	3.02383e-08	mbl/Drip/VhaAC45/Pfk/Cbp53E/Rbcn-3A/Hex-A/alc/CG7484/Nmdar1/Ald1/Ras85D/IscU/LpR1/Actbeta/comt/CG1090/CG10470/PyK/Atg1/TER94/Eno/CG14757/SP2353/Atpalpha/zip/FASN1/Lpin/CG8993/fz2/SREBP/SNF4Agamma/Men-b/EMRE/kcc/Nckx30C/Uba1/Pgi/Xbp1/CG42542/Csp/Nhe2/Tpi/nrv3/Scox/SPoCk/Gapdh2/CG7430/IKKepsilon/mfrn/capt/Cat/Aps/Sik3/Lkb1/Raf/Madm/Usp5/arm/Rheb/ABCB7/SERCA/S6k/Sara/Ctr1A/Gyf/Trxr-1/unc80/VhaAC39-1…
GO:BP	taxis	GO:0042330	141/3338	347/12653	3.3726e-09	5.73427e-08	3.07564e-08	sm/slgA/sli/Nmdar1/shep/CadN/dpr11/Acsl/CG6330/SCAR/robo3/dally/beat-Ib/Sac1/Vav/fz2/Khc/lap/uzip/beat-Ic/RhoGAP93B/Ptp10D/AMPKalpha/ct/ena/capt/side/Fas3/CadN2/chb/Nedd4/Liprin-alpha/SelR/jeb/Rheb/beat-IIIb/Abl/beta-Spec/Sdc/Dad/Ptp4E/S6k/wun/stan/fra/pod1/nonA/hts/cdm/Nrt/Pdfr/Sema2a/E(Pc)/meigo/Clic/raptor/msps/Unc-115a/Ptp61F/bur/Rho1/hep/alpha-Spec/ATP6AP2/beat-Ia/nvy/Dg/haf/eIF2beta/mmy/Fmr…
GO:BP	macroautophagy	GO:0016236	58/3338	110/12653	3.38115e-09	5.73427e-08	3.07564e-08	Ras85D/Atg1/TER94/Arl8/Synj/aus/AMPKalpha/lqf/Atg3/Raf/GlyS/scny/stj/Rheb/Bruce/EndoA/bchs/car/ref(2)P/Atg17/Vps28/Vps16A/Atg18b/rl/CG5445/Blos1/CG8155/EMC6/Blos2/Rab18/Atg14/Vps4/Atg10/Vamp7/Rab3-GAP/CG11975/Vha100-1/ema/Rab3GAP1/Syx17/hid/Sbf/Rab39/Rab1/Atg9/Tor/mv/Atg13/Rab21/Aduk/Mitf/Atg8a/Lamp1/p47/Vps13D/Pi3K59F/SH3PX1/Atg18a
GO:BP	open tracheal system development	GO:0007424	108/3338	249/12653	3.62978e-09	6.12057e-08	3.28284e-08	sli/Rbcn-3A/Ras85D/Vha26/baz/TSG101/Dlic/dally/Sac1/hdc/bnl/Vav/Atpalpha/zip/Hs6st/Sec24CD/shi/Ptp10D/ct/aop/trh/CCT3/IKKepsilon/Hr78/garz/Raf/deltaCOP/Nsf2/arm/Rheb/dmt/Sdc/Nrx-IV/Ptp4E/wun/stan/Stat92E/Stam/gammaCOP/VhaAC39-1/drk/Lam/noc/Mcr/Smn/rl/Dhc64C/kkv/Akt/Rho1/Sec23/sfl/Dsor1/chico/Rab35/Blimp-1/mmy/Vha100-1/DAAM/dome/Src64B/csw/vari/Sec5/Moe/pasi1/Hph/bs/hid/wkd/VhaPPA1-1/sqh/dsh/sano/…
GO:BP	protein targeting	GO:0006605	70/3338	142/12653	3.77751e-09	6.33326e-08	3.39692e-08	Trp1/CG2918/GABPI/boca/Sgt/UQCR-C1/CG1598/Sec61beta/CG31229/Spase22-23/milt/Pex13/CG11779/Srp19/Sec61alpha/CG7382/Roe1/CG7639/SrpRalpha/Spase25/CG8860/car/Hsp60A/Tom7/Tim23/CG7394/Tom40/Tom70/Mon1/Hsc70-5/CG14894/CG6454/Tim9a/Pex19/CG1407/Vps37B/HPS4/Srp14/Srp9/Srp68/Pex14/Tim8/Srp72/Su(dx)/Dnz1/Srp54k/CG7791/CG8728/p/blp/Sec63/Pex5/CG30094/CG8206/mge/Rab6/Vsp37A/Pex3/CG5885/Vps13/Vps8/CG5447/CG1…
GO:BP	nucleocytoplasmic transport	GO:0006913	68/3338	137/12653	4.37873e-09	7.25831e-08	3.89308e-08	Ripalpha/Ns3/rdx/Abl/sgg/Clbn/Ntf-2/pix/emb/cdm/Nmd3/Tnpo/Klp64D/CG18259/CG11123/CG10286/Ran/msk/swm/CG9915/Ranbp16/Arp3/RanBP3/LTV1/SF2/Ranbp21/Sec13/CG6961/CG32409/Rae1/Nxt1/Nup93-2/Su(fu)/Moe/Arts/Hph/tho2/Nup50/Rcc1/Tnpo-SR/ZC3H3/aPKC/tex/Cbp80/cpb/Nup154/RanBPM/Strump/Ref1/Kap-alpha3/rempA/CG13185/Vhl/thoc6/SWIP/Sem1/Nup358/Kap-alpha1/Aladin/ebo/mbo/Apl/e(y)2/Nup75/cpa/Nup98-96/thoc7/Fs(2)Ket
GO:BP	nuclear transport	GO:0051169	68/3338	137/12653	4.37873e-09	7.25831e-08	3.89308e-08	Ripalpha/Ns3/rdx/Abl/sgg/Clbn/Ntf-2/pix/emb/cdm/Nmd3/Tnpo/Klp64D/CG18259/CG11123/CG10286/Ran/msk/swm/CG9915/Ranbp16/Arp3/RanBP3/LTV1/SF2/Ranbp21/Sec13/CG6961/CG32409/Rae1/Nxt1/Nup93-2/Su(fu)/Moe/Arts/Hph/tho2/Nup50/Rcc1/Tnpo-SR/ZC3H3/aPKC/tex/Cbp80/cpb/Nup154/RanBPM/Strump/Ref1/Kap-alpha3/rempA/CG13185/Vhl/thoc6/SWIP/Sem1/Nup358/Kap-alpha1/Aladin/ebo/mbo/Apl/e(y)2/Nup75/cpa/Nup98-96/thoc7/Fs(2)Ket
GO:BP	exocytosis	GO:0006887	55/3338	103/12653	4.70743e-09	7.72397e-08	4.14284e-08	Syn/CASK/comt/ALiX/gammaSnap1/Syt4/shi/alphaSnap/Syx13/Csp/Scamp/Rab11/Septin4/Nsf2/Vps45/cm/Vap33/Rop/BicD/hob/NFAT/gammaSnap2/nSyb/Rab3/Exo84/Syx6/Amph/Syx5/Sec10/Rab35/Vamp7/Rab3GAP1/Sec5/PICK1/Syx17/cpx/Syt1/Rab6/Cadps/Mctp/Syx8/Rab8/Rab7/mop/Rph/Hrs/jar/stmA/Sec6/stac/Sec15/jagn/Septin1/Snap25/Sec8
GO:BP	vesicle-mediated transport to the plasma membrane	GO:0098876	37/3338	59/12653	4.71231e-09	7.72397e-08	4.14284e-08	comt/sp3/CG18659/Rab11/Vps53/IKKepsilon/Snx3/Nsf2/Past1/sau/fidipidine/RhoGAP68F/Ubc6/Vps26/Vps35/Exo84/Rho1/Sec10/Rab35/Arfrp1/Sec71/wls/Sec5/Vps52/Gga/Crag/Sbf/Vps50/Rab7/mop/Hrs/Tor/mtm/Sec6/CG5447/Sec15/Sec8
GO:BP	cellular lipid metabolic process	GO:0044255	161/3338	410/12653	4.85788e-09	7.91835e-08	4.2471e-08	Acsl/sp3/elm/Alg11/Sac1/FASN1/Lpin/Pcyt2/SREBP/CG2201/Synj/Xbp1/Hydr2/frj/CG1309/Hmgs/CG14130/Taz/CG15111/alpha4GT1/Ipp/CG16935/CG14411/ND-ACP/Pect/rdgB/Sik3/Lkb1/C1GalTA/nes/INPP5E/Vap33/fwd/CG5191/CG8814/Abcd3/SERCA/Ttc7/bbc/wun/CG17646/PIG-T/Sccpdh1/Pcyt1/CLS/Dd/CG9391/crc/Sap-r/Sply/Hydr1/GAA1/AdipoR/CG7990/lace/Serinc/Fatp1/Socs36E/PGAP1/CG3149/PIG-G/inaE/CG30491/Akt/Egm/schlank/ghi/5PtaseI/…
GO:BP	neuromuscular synaptic transmission	GO:0007274	47/3338	83/12653	5.05053e-09	8.18688e-08	4.39113e-08	CASK/comt/nwk/alphaSnap/Csp/Scamp/Tbce/Nsf2/stj/jeb/beta-Spec/SERCA/P32/Pink1/Syx18/Nmnat/Nlg2/dj-1beta/Smn/wrd/Blos1/Nrx-1/wit/alpha-Spec/Fmr1/Nadsyn/Upf2/Fsn/RhoGAP92B/Dys/dysc/Neto/Smg6/cpx/Syt1/ChAT/tkv/Alk/TBPH/hiw/twf/Galphaq/spas/Snap25/Syp/Cdc42/cv-c
GO:BP	regulation of actin filament-based process	GO:0032970	58/3338	111/12653	5.27414e-09	8.50237e-08	4.56034e-08	Arpc3A/Kank/nwk/SCAR/tmod/Vav/shi/svr/spoon/ena/dco/Nedd4/Cip4/p38b/Abl/Atx2/Naus/gek/Lam/LRR/Arpc5/RhoGAP68F/CG31715/Arpc2/Rho1/hep/Ssrp/PsGEF/Rab35/Ocrl/Cortactin/Vrp1/RhoGAP92B/DAAM/Src64B/Moe/HSPC300/PICK1/Akap200/step/Ggamma1/sqh/dsh/Arfip/Arpc4/cpb/jar/smog/Abi/Rac1/twf/Strump/Svil/mys/Gel/Cdc42/cpa/Nup98-96
GO:BP	regulation of cell death	GO:0010941	120/3338	286/12653	5.53711e-09	8.87753e-08	4.76157e-08	Ras85D/E2f1/HUWE1/Cul1/CG2918/Atg1/TER94/futsch/pnut/Tango9/Cp1/Nf-YB/Uba1/MED24/ben/Dp/alpha4GT1/sigmar/dco/aux/Idh3b/rdx/Lkb1/Raf/Usp5/RYBP/Der-1/scny/Sec61alpha/zda/Rheb/dmt/Bruce/CG9922/Pink1/Men/Clbn/Den1/Tspo/Ubr3/pix/Atx2/lncRNA:Hsromega/Axn/Drak/DUBAI/CG9231/slmb/l(3)psg2/vimar/CG4238/dj-1beta/lsn/Drep1/SCCRO3/Met/26-29-p/Ubc6/Prx3/HtrA2/Sirt1/msk/Aatf/wrd/Akt/MAGE/DCAF12/hep/CG32202/ebi/…
GO:BP	regulation of cell projection organization	GO:0031344	78/3338	165/12653	5.66306e-09	9.03012e-08	4.84341e-08	Hasp/baz/CadN/pico/HUWE1/atl/Dlic/SCAR/RhoGAPp190/fz2/AMPKalpha/ena/sif/Nedd4/C1GalTA/Pak3/nudC/Rheb/Abl/GM130/nudE/Rop/S6k/stan/fra/Arp2/G9a/Sema2a/Naus/fry/LRR/raptor/Kr-h1/Tm1/Ythdf/Akt/Rho1/Sec23/Ret/hep/Arp3/Sar1/PsGEF/Rab35/mmy/Flo2/Fmr1/Vang/tutl/DAAM/Sema1a/Wnt5/Pi3K92E/HSPC300/trc/vvl/LIMK1/dsh/aPKC/Rab1/Sema1b/cpb/DCTN1-p150/Trim9/TBPH/PlexB/Tor/Abi/Rac1/psidin/Pten/twf/lva/spas/Cdc42/b…
GO:BP	cell growth	GO:0016049	74/3338	154/12653	5.70591e-09	9.04927e-08	4.85368e-08	CadN/Atg1/atl/SCAR/Larp4B/cic/fz2/sima/Rab11/AMPKalpha/dco/CadN2/Lkb1/eag/Liprin-alpha/arm/Rheb/puf/slpr/mRpL12/Dad/S6k/stan/pix/Nf1/Sema2a/Frl/raptor/SCCRO3/CG9328/poe/Ythdf/Akt/Rho1/Mnt/hep/chico/Fmr1/Vang/DAAM/Sema1a/Wnt5/Pi3K92E/hfp/Hph/Rab5/RagA-B/CG15019/srl/sqh/dsh/vito/Pdk1/Sema1b/tkv/bsk/DCTN1-p150/Nup154/Tor/Abi/Rac1/Pten/Tcs5/FER/InR/jagn/spas/Cdc42/Thor/path/Strip/bif/Mtl/kay
GO:BP	establishment of vesicle localization	GO:0051650	39/3338	64/12653	5.9391e-09	9.36846e-08	5.02488e-08	CASK/ALiX/shi/Khc/lap/Khc-73/Rab11/milt/Liprin-alpha/nudE/ArfGAP3/Rop/Exo84/Dhc64C/Blos1/Sec23/Myo95E/Sar1/Sec10/Rab35/Fmr1/Sec5/Aplip1/BORCS5/AP-2alpha/Rab7/DCTN1-p150/Hrs/jar/CG17765/Klp98A/Sec6/sesB/Sec15/Snap25/Miro/Sec8/Start1/Golgin104
GO:BP	cell death	GO:0008219	159/3338	405/12653	6.17548e-09	9.68923e-08	5.19693e-08	mbl/trus/Coa8/Ras85D/E2f1/cathD/HUWE1/Cul1/CG2918/Atg1/TER94/Drep4/hdc/futsch/pnut/shi/Tango9/Cp1/Nf-YB/Uba1/MED24/ben/CG14130/Dp/drpr/alpha4GT1/sigmar/tub/dco/IKKepsilon/aux/Idh3b/rdx/Lkb1/Raf/Usp5/RYBP/Der-1/scny/arm/Sec61alpha/zda/Rheb/dmt/Bruce/CG9922/Pink1/Men/wun/Clbn/Den1/Tspo/Ubr3/Hsp60A/pix/Atx2/lncRNA:Hsromega/Axn/Drak/CG10209/Tao/DUBAI/CG9231/slmb/l(3)psg2/vimar/CG4238/dj-1beta/lsn/Atg…
GO:BP	cellular response to endogenous stimulus	GO:0071495	111/3338	260/12653	6.5171e-09	1.01708e-07	5.45525e-08	Ras85D/Cul1/ths/dally/bnl/5-HT7/Lpin/anchor/Hydr2/Med/sima/Usp47/Ptp10D/Ns3/aop/GlyP/lqf/Mkrn1/Sik3/Raf/Rheb/p38b/Crtc/sgg/Dad/Ptp4E/S6k/gro/G9a/drk/Lamtor1/Iswi/5-HT2A/Tao/Dd/Glo1/slmb/sxc/vap/TrissinR/raptor/AdipoR/Sirt1/cv/rl/Lamtor3/wrd/Ptp61F/Pp2A-29B/Akt/wit/sfl/Dsor1/Chd64/chico/Mad/Fmr1/nord/gce/Hr39/Src64B/Pi3K92E/csw/RasGAP1/Nurf-38/spin/Cdc37/Lpt/Dh44/SkpA/HDAC4/RagA-B/step/STUB1/Ack/5…
GO:BP	regulation of actin cytoskeleton organization	GO:0032956	57/3338	109/12653	6.86794e-09	1.06617e-07	5.7185e-08	Arpc3A/Kank/nwk/SCAR/tmod/Vav/shi/svr/spoon/ena/dco/Nedd4/Cip4/p38b/Abl/Atx2/Naus/gek/Lam/LRR/Arpc5/RhoGAP68F/CG31715/Arpc2/Rho1/hep/Ssrp/PsGEF/Ocrl/Cortactin/Vrp1/RhoGAP92B/DAAM/Src64B/Moe/HSPC300/PICK1/Akap200/step/Ggamma1/sqh/dsh/Arfip/Arpc4/cpb/jar/smog/Abi/Rac1/twf/Strump/Svil/mys/Gel/Cdc42/cpa/Nup98-96
GO:BP	positive regulation of proteolysis involved in cellular protein catabolic process	GO:1903052	38/3338	62/12653	7.39348e-09	1.14171e-07	6.12368e-08	Cul1/TER94/UbcE2H/Xbp1/ari-1/Usp2/dco/fzr/Usp5/EloB/sordd1/scny/sgg/Axn/slmb/Ufd1/Ubc6/poe/ebi/CG8405/sip3/Rnf146/CG31855/CG9951/SkpA/STUB1/Cul2/Ufd4/muskelin/Roc1a/CkIalpha/POSH/RanBPM/Kcmf1/wds/Sou/rpr/Tnks
GO:BP	oxidative phosphorylation	GO:0006119	51/3338	94/12653	8.32278e-09	1.27848e-07	6.85729e-08	SdhA/Cyt-c1/ND-B14.5B/Chchd2/ND-75/CG14757/ND-B14.5A/cype/UQCR-6.4/ATPsynbeta/SdhB/SdhC/bsf/ND-B22/ATPsynF/CG9005/SdhD/ND-51/CG42376/Cyt-c-p/COX4/UQCR-Q/ND-42/Pink1/RFeSP/Tspo/levy/ND-49/COX5A/dj-1beta/ND-B17.2/Nipsnap/sun/ND-B17/ND-19/ND-ASHI/COX5B/CG11035/COX7A/UQCR-C2/CG7630/ATPsynbetaL/srl/CG12895/ND-13A/ATPsynO/ND-24/UQCR-11/COX8/CG3337/ND-23
GO:BP	regulation of anatomical structure morphogenesis	GO:0022603	86/3338	189/12653	9.46377e-09	1.44618e-07	7.75676e-08	baz/CadN/HUWE1/atl/flw/Dlic/Marf/SCAR/RhoGAPp190/fred/zip/Sec24CD/fz2/Rab11/aop/dco/capt/sif/Nedd4/Pak3/raw/nudC/slpr/Abl/GM130/nudE/Pink1/stan/fra/G9a/Sema2a/Naus/par-1/fry/Frl/kmr/rl/SelG/Ythdf/Arpc2/Rho1/Sec23/Sar1/Rab35/Fmr1/Sps1/Vang/tutl/CG9855/DAAM/Sema1a/Wnt5/Moe/HSPC300/trc/nmo/vvl/Ggamma1/LIMK1/dsh/aPKC/Rab1/Sema1b/Miga/Arpc4/Ankrd49/DCTN1-p150/Trim9/smog/Drp1/hop/PlexB/Abi/Rac1/Pten/lv…
GO:BP	intra-Golgi vesicle-mediated transport	GO:0006891	21/3338	26/12653	1.04573e-08	1.58973e-07	8.52671e-08	comt/alphaSnap/Cog1/Bet3/zetaCOP/Nsf2/gammaCOP/sau/brun/Golgin84/SIDL/epsilonCOP/betaCOP/Cog6/fws/Rab6/Cog7/Gos28/alphaCOP/Cog4/Cog2
GO:BP	Golgi organization	GO:0007030	46/3338	82/12653	1.10029e-08	1.66404e-07	8.92527e-08	comt/TER94/atl/Sec24CD/Ccm3/Use1/Tango5/prd1/Cog1/Surf4/mbt/dop/garz/bai/Asap/fwd/GM130/p24-1/sau/Grasp65/opm/Osbp/cnn/Bet1/RhoGAP1A/Cad96Ca/Sec22/Sec23/CG33298/Ire1/Golgin84/Tango6/Tango1/Cog7/CG4041/GPHR/ecd/CG6569/Zw10/p47/CG8230/Arl1/eca/Cog4/Cog2/p115
GO:BP	transmembrane receptor protein tyrosine kinase signaling pathway	GO:0007169	99/3338	227/12653	1.14817e-08	1.72756e-07	9.26597e-08	Ras85D/Cul1/ths/dally/bnl/Vav/cic/Lpin/gcl/14-3-3zeta/sima/Usp47/Ptp10D/Ns3/aop/GlyP/Mkrn1/Sik3/Raf/jeb/Rheb/Mvb12/slpr/sgg/Graf/Ptp4E/S6k/gro/drk/Eph/Glo1/slmb/sxc/vap/spg/raptor/Cad96Ca/rl/Socs36E/Cul3/wrd/Ptp61F/Pp2A-29B/Akt/Ret/hep/sfl/ebi/Dsor1/chico/p130CAS/Fmr1/Vps4/Reph/Socs16D/mask/alph/Src64B/Cbl/Pi3K92E/pum/csw/RasGAP1/cdi/Cdc37/SkpA/HDAC4/step/STUB1/srl/Pdk1/Sik2/Alk/Roc1a/bsk/mop/cnk…
GO:BP	regulation of stress-activated protein kinase signaling cascade	GO:0070302	41/3338	70/12653	1.25825e-08	1.88352e-07	1.01025e-07	HUWE1/ALiX/flw/Sac1/Mnn1/ben/sigmar/rdx/Lkb1/Usp5/raw/slpr/sgg/lncRNA:Hsromega/crc/MAPk-Ak2/Ptp61F/ebi/alph/Traf6/fmt/Urm1/syd/SkpA/Aplip1/Alg-2/puc/Mekk1/cpb/slim/Atg9/POSH/Rac1/XNP/Mnat9/PEK/Cdc42/Strip/rpr/cpa/JMJD6
GO:BP	cell-cell signaling by wnt	GO:0198738	65/3338	132/12653	1.42605e-08	2.11314e-07	1.13341e-07	tws/HUWE1/Cul1/TER94/flw/Eip63E/dally/fz2/lgs/CG11523/Usp47/aop/dco/Ssdp/Dyrk2/arm/sgg/hyd/Kap3/gro/Axn/Duba/Prosap/slmb/Klp64D/Nulp1/Vps26/Vps35/Wnk/nej/Rho1/RanBP3/sfl/osa/ATP6AP2/CycY/Flo2/Apc/Vang/Rnf146/Wnt5/wls/Bili/Sin3A/SkpA/nmo/skd/ebd1/hyx/dsh/Roc1a/CkIalpha/mop/kto/Hrs/SoxN/apolpp/Pp1alpha-96A/pygo/nkd/Sulf1/rempA/CtBP/Drl-2/Tnks
GO:BP	cell surface receptor signaling pathway involved in cell-cell signaling	GO:1905114	65/3338	132/12653	1.42605e-08	2.11314e-07	1.13341e-07	tws/HUWE1/Cul1/TER94/flw/Eip63E/dally/qvr/fz2/lgs/CG11523/Usp47/aop/dco/Ssdp/Dyrk2/arm/sgg/hyd/Kap3/gro/Axn/Duba/Prosap/slmb/Klp64D/Nulp1/Smn/Vps26/Vps35/Wnk/nej/Rho1/RanBP3/sfl/osa/ATP6AP2/CycY/Flo2/Apc/Vang/Rnf146/Wnt5/wls/Rab3GAP1/Bili/Sin3A/SkpA/nmo/skd/ebd1/hyx/dsh/Roc1a/CkIalpha/kto/SoxN/apolpp/Pp1alpha-96A/pygo/nkd/Sulf1/rempA/CtBP/Tnks
GO:BP	mitochondrial respiratory chain complex assembly	GO:0033108	40/3338	68/12653	1.596e-08	2.34133e-07	1.2558e-07	ND-B14.7/ND-B14.5B/Sirup/Sdhaf3/CG14757/CG14483/Scox/ND-B22/ND-B18/ND-ACP/CG11722/CG7639/ND-20/CG13392/ND-SGDH/CG3262/ND-B15/CG11562/ND-18/ND-B17.2/CG34150/COX6B/CG34242/ND-B16.6/ND-19/CG4186/l(3)neo43/ND-ASHI/l(3)87Df/ND-39/CG5569/CG4957/ND-B12/CG12895/ND-B14/ND-15/CG3270/CG4942/ND-PDSW/ND-23
GO:BP	vesicle localization	GO:0051648	40/3338	68/12653	1.596e-08	2.34133e-07	1.2558e-07	CASK/ALiX/shi/Khc/lap/Khc-73/Rab11/milt/Liprin-alpha/nudE/ArfGAP3/Rop/Exo84/Dhc64C/wrd/Blos1/Sec23/Myo95E/Sar1/Sec10/Rab35/Fmr1/Sec5/Aplip1/BORCS5/AP-2alpha/Rab7/DCTN1-p150/Hrs/jar/CG17765/Klp98A/Sec6/sesB/Sec15/Snap25/Miro/Sec8/Start1/Golgin104
GO:BP	phospholipid metabolic process	GO:0006644	74/3338	157/12653	1.62035e-08	2.36522e-07	1.26861e-07	Acsl/sp3/elm/Sac1/Pcyt2/CG2201/Synj/frj/CG1309/Hmgs/Taz/CG15111/Ipp/CG14411/Pect/rdgB/nes/INPP5E/Vap33/fwd/Ttc7/bbc/wun/PIG-T/Pcyt1/CLS/Dd/CG9391/GAA1/CG7990/Serinc/Socs36E/PGAP1/PIG-G/5PtaseI/PIG-L/Dpm3/CG2818/Ocrl/Hyccin/PIG-F/FIG4/Socs16D/Mppe/sPLA2/PGAP5/Pi3K92E/CG6805/PGS1/CG6707/Ack/Agpat1/PIG-K/Idi/PIG-S/CG14883/PIG-Q/Pmvk/CTPsyn/puml/CG18135/PIP5K59B/Pten/Cds/Inos/CG7149/rdgA/Pi3K21B/CG33…
GO:BP	positive regulation of cellular catabolic process	GO:0031331	80/3338	174/12653	1.74545e-08	2.52274e-07	1.3531e-07	Actbeta/Cul1/Atg1/TER94/Dora/shi/UbcE2H/Pop2/Synj/Pabp2/ari-1/sima/AMPKalpha/Rga/GlyP/dco/Not1/fzr/Usp5/EloB/sordd1/GlyS/sgg/Pink1/S6k/AP-1-2beta/Doa/Axn/slmb/Ufd1/DCP2/Ubc6/twin/PAN2/poe/Ythdf/hep/ebi/Ge-1/sip3/Rnf146/Cpsf6/CG31855/CycC/Traf6/pum/CG9951/roq/Not3/SkpA/hid/STUB1/Sbf/Fer2/Cul2/AP-2alpha/Ufd4/muskelin/Roc1a/CkIalpha/aub/bsk/Patr-1/POSH/RanBPM/Rab21/Kcmf1/Aduk/Mitf/smg/PEK/wds/PAN3/R…
GO:BP	synaptic vesicle exocytosis	GO:0016079	37/3338	61/12653	1.7409e-08	2.52274e-07	1.3531e-07	Syn/CASK/comt/gammaSnap1/Syt4/shi/alphaSnap/Syx13/Csp/Scamp/Nsf2/Vps45/Vap33/Rop/BicD/NFAT/gammaSnap2/nSyb/Rab3/Exo84/Syx6/Sec10/Rab3GAP1/Sec5/Syx17/cpx/Syt1/Cadps/Mctp/Syx8/mop/Rph/stmA/Sec6/stac/Snap25/Sec8
GO:BP	response to endogenous stimulus	GO:0009719	112/3338	267/12653	1.81089e-08	2.60448e-07	1.39694e-07	Ras85D/Cul1/ths/dally/bnl/5-HT7/Lpin/anchor/Hydr2/Med/sima/Usp47/Ptp10D/Ns3/aop/GlyP/lqf/Mkrn1/Sik3/Raf/Rheb/p38b/Crtc/sgg/Dad/Ptp4E/S6k/gro/G9a/drk/Lamtor1/Iswi/5-HT2A/Tao/Dd/Glo1/slmb/sxc/vap/TrissinR/raptor/AdipoR/Sirt1/cv/rl/Lamtor3/wrd/Ptp61F/Pp2A-29B/Akt/wit/sfl/Dsor1/Chd64/chico/Mad/Fmr1/nord/gce/Hr39/Src64B/Pi3K92E/csw/RasGAP1/Nurf-38/spin/Cdc37/Lpt/Dh44/SkpA/HDAC4/RagA-B/step/STUB1/Ack/5…
GO:BP	JNK cascade	GO:0007254	44/3338	78/12653	1.81983e-08	2.60458e-07	1.397e-07	HUWE1/ALiX/flw/Sac1/Mnn1/ben/sigmar/rdx/Lkb1/Usp5/raw/slpr/sgg/lncRNA:Hsromega/crc/MAPk-Ak2/Ptp61F/hep/ebi/alph/Traf6/fmt/Urm1/syd/SkpA/Aplip1/Alg-2/puc/Mekk1/bsk/cpb/Atg9/POSH/Rac1/XNP/Mnat9/PEK/Cdc42/Strip/rpr/Jra/cpa/Mtl/JMJD6
GO:BP	ncRNA metabolic process	GO:0034660	150/3338	383/12653	2.00681e-08	2.85824e-07	1.53305e-07	Cbp20/ThrRS/ADD1/Dora/CG6999/CG4866/drosha/AGO2/TyrRS/Nopp140/mRpS11/Ars2/CG1789/CG32706/bin3/CG11030/GatA/AspRS-m/TrpRS/AlaRS/CG2260/CG6724/dbe/CG4610/CG3434/Rrp47/CG11123/Nbr/Polr2K/Dph3/CG14618/CysRS-m/Non3/CG1463/Mtr4/CG14805/Polr2F/wuho/LTV1/Polr2H/Trm7-32/Elp2/Trf4-1/Pop5/CG2034/Trmt112/CG7637/alpha-PheRS/Snp/rswl/CG4364/omd/IntS10/IntS9/Nop60B/CG1750/CycC/CG32409/IntS6/Uba4/Rpp25/CG7275/CG…
GO:BP	regulation of JNK cascade	GO:0046328	39/3338	66/12653	2.0211e-08	2.86469e-07	1.53651e-07	HUWE1/ALiX/flw/Sac1/Mnn1/ben/sigmar/rdx/Lkb1/Usp5/raw/slpr/sgg/lncRNA:Hsromega/crc/MAPk-Ak2/Ptp61F/ebi/alph/Traf6/fmt/Urm1/syd/SkpA/Aplip1/Alg-2/Mekk1/cpb/Atg9/POSH/Rac1/XNP/Mnat9/PEK/Cdc42/Strip/rpr/cpa/JMJD6
GO:BP	enzyme linked receptor protein signaling pathway	GO:0007167	123/3338	301/12653	2.30336e-08	3.24906e-07	1.74267e-07	Ras85D/Actbeta/Cul1/Nplp1/ths/dally/bnl/Vav/cic/Lpin/gcl/14-3-3zeta/anchor/Med/sima/Usp47/Ptp10D/Ns3/aop/GlyP/lqf/Mkrn1/Sik3/Raf/jeb/Rheb/Mvb12/p38b/slpr/sgg/Dad/Graf/Ptp4E/S6k/gro/drk/Eph/Tao/Dd/Glo1/slmb/sxc/vap/spg/raptor/cv/Cad96Ca/rl/Socs36E/Cul3/wrd/Ptp61F/Pp2A-29B/Akt/Ret/hep/wit/CG31183/sfl/ebi/Dsor1/chico/Mad/p130CAS/Fmr1/nord/Vps4/Reph/Socs16D/mask/alph/Src64B/Cbl/Pi3K92E/pum/csw/RasGAP…
GO:BP	eye development	GO:0001654	168/3338	440/12653	2.35189e-08	3.27036e-07	1.75409e-07	mbl/Ras85D/exd/Actbeta/hth/CadN/Sobp/SCAR/siz/dally/bnl/Vav/cic/SP2353/fred/shi/Khc/alphaSnap/14-3-3zeta/Nf-YB/Nckx30C/rin/Nhe2/Rab11/hbs/RASSF8/Usp47/Hrb87F/ena/aop/unk/mbt/capt/cindr/sif/aux/CadN2/rdx/kirre/Raf/fzr/Usp5/Liprin-alpha/arm/Asap/jeb/Abl/AP-1gamma/ArfGAP3/Pink1/Mob2/stan/bchs/fra/Efa6/AP-1-2beta/Atx2/Doa/caz/drk/Past1/Pcyt1/Tao/vimar/Fur2/Lam/fry/Frl/spg/noc/Kr-h1/GAA1/Hs3st-B/msk/r…
GO:BP	sensory system development	GO:0048880	168/3338	440/12653	2.35189e-08	3.27036e-07	1.75409e-07	mbl/Ras85D/exd/Actbeta/hth/CadN/Sobp/SCAR/siz/dally/bnl/Vav/cic/SP2353/fred/shi/Khc/alphaSnap/14-3-3zeta/Nf-YB/Nckx30C/rin/Nhe2/Rab11/hbs/RASSF8/Usp47/Hrb87F/ena/aop/unk/mbt/capt/cindr/sif/aux/CadN2/rdx/kirre/Raf/fzr/Usp5/Liprin-alpha/arm/Asap/jeb/Abl/AP-1gamma/ArfGAP3/Pink1/Mob2/stan/bchs/fra/Efa6/AP-1-2beta/Atx2/Doa/caz/drk/Past1/Pcyt1/Tao/vimar/Fur2/Lam/fry/Frl/spg/noc/Kr-h1/GAA1/Hs3st-B/msk/r…
GO:BP	visual system development	GO:0150063	168/3338	440/12653	2.35189e-08	3.27036e-07	1.75409e-07	mbl/Ras85D/exd/Actbeta/hth/CadN/Sobp/SCAR/siz/dally/bnl/Vav/cic/SP2353/fred/shi/Khc/alphaSnap/14-3-3zeta/Nf-YB/Nckx30C/rin/Nhe2/Rab11/hbs/RASSF8/Usp47/Hrb87F/ena/aop/unk/mbt/capt/cindr/sif/aux/CadN2/rdx/kirre/Raf/fzr/Usp5/Liprin-alpha/arm/Asap/jeb/Abl/AP-1gamma/ArfGAP3/Pink1/Mob2/stan/bchs/fra/Efa6/AP-1-2beta/Atx2/Doa/caz/drk/Past1/Pcyt1/Tao/vimar/Fur2/Lam/fry/Frl/spg/noc/Kr-h1/GAA1/Hs3st-B/msk/r…
GO:BP	regulation of stress-activated MAPK cascade	GO:0032872	40/3338	69/12653	2.83358e-08	3.92156e-07	2.10338e-07	HUWE1/ALiX/flw/Sac1/Mnn1/ben/sigmar/rdx/Lkb1/Usp5/raw/slpr/sgg/lncRNA:Hsromega/crc/MAPk-Ak2/Ptp61F/ebi/alph/Traf6/fmt/Urm1/syd/SkpA/Aplip1/Alg-2/Mekk1/cpb/slim/Atg9/POSH/Rac1/XNP/Mnat9/PEK/Cdc42/Strip/rpr/cpa/JMJD6
GO:BP	protein localization to endoplasmic reticulum	GO:0070972	26/3338	37/12653	2.93064e-08	4.03685e-07	2.16521e-07	Trp1/CG2918/Sgt/KdelR/CG1598/Sec61beta/Spase22-23/Srp19/Sec61alpha/SrpRalpha/Spase25/CG8860/CG13887/Rep/Srp14/Srp9/CG11857/Srp68/Srp72/Srp54k/Rab3GAP1/Sec63/CG30094/CG5885/CG5742/SrpRbeta
GO:BP	regulation of protein modification process	GO:0031399	85/3338	190/12653	3.02949e-08	4.15351e-07	2.22778e-07	Dap160/Actbeta/Cul1/bnl/Ccm3/shi/Ctr9/SNF4Agamma/CG9098/SCCRO/Pabp2/svr/CG9578/dco/dod/fzr/Lk6/SCCRO4/p38b/CG14408/Wee1/Hexim/sgg/Dad/hyd/Mob2/bchs/car/Axn/G9a/par-1/Atg17/Ndfip/fry/raptor/SCCRO3/senju/I-2/CG17059/CG30291/Rho1/Ssrp/CG40191/CG8209/CycY/mmy/endos/pcs/fmt/Cbl/Pi3K92E/ASPP/Diap2/CG13994/mats/CG10376/step/STUB1/Cand1/Mat1/Ankle2/Mekk1/Su(z)2/krz/CG4911/PPP1R15/Fdh/Patj/Cdk7/Tor/Abi/Ra…
GO:BP	positive regulation of proteolysis	GO:0045862	53/3338	102/12653	3.06227e-08	4.16131e-07	2.23197e-07	Cul1/TER94/UbcE2H/Cp1/Xbp1/ari-1/hbs/Usp2/dco/IKKepsilon/fzr/Usp5/EloB/sordd1/scny/Cyt-c-p/sgg/Axn/slmb/Ufd1/26-29-p/Ubc6/HtrA2/Cul3/poe/CG13404/ebi/pen-2/ScsbetaA/CG8405/sip3/Rnf146/Jafrac2/CG31855/CG9951/SkpA/hid/STUB1/Cul2/Ufd4/muskelin/Roc1a/CkIalpha/krz/REG/POSH/RanBPM/Kcmf1/RnrS/wds/Sou/rpr/Tnks
GO:BP	regulation of actin filament organization	GO:0110053	44/3338	79/12653	3.06354e-08	4.16131e-07	2.23197e-07	Arpc3A/Kank/nwk/SCAR/tmod/shi/svr/spoon/dco/Cip4/p38b/Abl/Atx2/Naus/gek/Lam/LRR/Arpc5/RhoGAP68F/CG31715/Arpc2/hep/Ssrp/PsGEF/Cortactin/Vrp1/RhoGAP92B/DAAM/Src64B/HSPC300/PICK1/dsh/Arfip/Arpc4/cpb/Abi/twf/Strump/Svil/mys/Gel/Cdc42/cpa/Nup98-96
GO:BP	lamellipodium organization	GO:0097581	20/3338	25/12653	3.22759e-08	4.36395e-07	2.34065e-07	SCAR/ena/Abl/Naus/LRR/Unc-115a/Tm1/hep/Arp3/HSPC300/aPKC/cpb/Abi/Rac1/psidin/twf/Cdc42/SH3PX1/cpa/Mtl
GO:BP	movement in host	GO:0044000	23/3338	31/12653	3.61427e-08	4.79832e-07	2.57363e-07	TER94/TSG101/shrb/shi/Vps29/Rab11/Sec61alpha/AP-1-2beta/sau/Mvl/Rab3/Sar1/Sec10/Rab35/Vps4/Rab30/betaCOP/Rab5/Rab1/Rab8/Rab7/Rab10/Sec8
GO:BP	entry into host	GO:0044409	23/3338	31/12653	3.61427e-08	4.79832e-07	2.57363e-07	TER94/TSG101/shrb/shi/Vps29/Rab11/Sec61alpha/AP-1-2beta/sau/Mvl/Rab3/Sar1/Sec10/Rab35/Vps4/Rab30/betaCOP/Rab5/Rab1/Rab8/Rab7/Rab10/Sec8
GO:BP	viral entry into host cell	GO:0046718	23/3338	31/12653	3.61427e-08	4.79832e-07	2.57363e-07	TER94/TSG101/shrb/shi/Vps29/Rab11/Sec61alpha/AP-1-2beta/sau/Mvl/Rab3/Sar1/Sec10/Rab35/Vps4/Rab30/betaCOP/Rab5/Rab1/Rab8/Rab7/Rab10/Sec8
GO:BP	biological process involved in interaction with host	GO:0051701	23/3338	31/12653	3.61427e-08	4.79832e-07	2.57363e-07	TER94/TSG101/shrb/shi/Vps29/Rab11/Sec61alpha/AP-1-2beta/sau/Mvl/Rab3/Sar1/Sec10/Rab35/Vps4/Rab30/betaCOP/Rab5/Rab1/Rab8/Rab7/Rab10/Sec8
GO:BP	regulation of multicellular organismal development	GO:2000026	118/3338	288/12653	3.72151e-08	4.91843e-07	2.63806e-07	Dap160/plum/mnb/Actbeta/nwk/tws/CadN/Octbeta2R/atl/hdc/Ctr9/ari-1/Rab11/Usp2/ena/aop/unk/sif/Nedd4/Pak3/dbo/nudC/stj/Rheb/Cip4/slpr/Abl/GM130/nudE/sgg/Sdc/Dad/Mob2/stan/Fak/Arp2/G9a/caz/Nf1/Sema2a/stau/Tao/par-1/slmb/raptor/RhoGAP68F/Smn/Hs3st-B/SelG/Ythdf/Akt/MAGE/Rho1/Sec23/Arp3/Pp2B-14D/wit/Sar1/osa/Liprin-gamma/Mad/barc/Rab35/Fmr1/simj/Vang/Fsn/RhoGAP92B/CSN5/Synd/Src64B/Sema1a/Wnt5/Rae1/Pi3K…
GO:BP	positive regulation of protein modification process	GO:0031401	45/3338	82/12653	3.92531e-08	5.16451e-07	2.77004e-07	Dap160/Actbeta/Cul1/bnl/Ccm3/CG9098/SCCRO/Pabp2/dod/fzr/Lk6/SCCRO4/p38b/Mob2/Axn/Atg17/Ndfip/fry/raptor/SCCRO3/senju/Rho1/mmy/Pi3K92E/ASPP/Diap2/mats/step/STUB1/Mat1/Ankle2/Mekk1/Su(z)2/krz/CG4911/PPP1R15/Tor/Abi/Rac1/Atg13/CG7044/ash2/Cdc42/rpr/Ndf
GO:BP	regulation of proteasomal ubiquitin-dependent protein catabolic process	GO:0032434	36/3338	60/12653	4.05757e-08	5.31469e-07	2.85059e-07	Cul1/TER94/UbcE2H/ari-1/Usp47/dco/fzr/Usp5/Ufl1/EloB/sgg/Axn/slmb/Ufd1/Ubc6/poe/ebi/CG8209/Rnf146/CSN5/CG31855/SkpA/STUB1/Cul2/Ufd4/muskelin/Roc1a/CkIalpha/eIF3h/POSH/RanBPM/Kcmf1/CkIIalpha/wds/Sou/Tnks
GO:BP	cell migration	GO:0016477	132/3338	331/12653	4.09121e-08	5.33494e-07	2.86146e-07	sli/Ras85D/CASK/Msp300/baz/SCAR/Evi5/ths/dally/bnl/Vav/zip/shi/fz2/sima/Rab11/spoon/ena/aop/dop/cindr/chb/Raf/fzr/not/nes/jeb/Abl/nudE/Sdc/Dad/wun/fra/Stat92E/Stam/drk/Sema2a/par-1/wol/slmb/Frl/LRR/Arpc5/Ostgamma/Dhc64C/Socs36E/nej/Akt/Rho1/hep/sfl/Dsor1/chico/p130CAS/Apc/Vang/veli/kel/Cortactin/Ptpmeg2/disp/CSN5/mask/dome/ttv/Sema1a/Cbl/Pi3K92E/pum/Invadolysin/csw/Sec5/spin/Sin3A/Rab5/Cerk/Ggamm…
GO:BP	synaptic vesicle recycling	GO:0036465	29/3338	44/12653	4.38265e-08	5.68969e-07	3.05173e-07	Dap160/mnb/CASK/Nlg4/shi/lap/Synj/Vps29/Rab11/Eps-15/stj/EndoA/BicD/Nlg2/Vps35/tweek/Blos1/Nrx-1/spin/Rab5/Syt1/AP-2alpha/stmA/Dab/twf/Nlg3/brat/Arl1/Arl2
GO:BP	regulation of apoptotic process	GO:0042981	88/3338	200/12653	4.49667e-08	5.812e-07	3.11733e-07	Ras85D/E2f1/Cul1/CG2918/Atg1/TER94/futsch/pnut/Tango9/Cp1/Nf-YB/Dp/alpha4GT1/sigmar/dco/rdx/Lkb1/Raf/Usp5/RYBP/Der-1/scny/zda/dmt/Bruce/CG9922/Pink1/Clbn/Den1/Tspo/Ubr3/pix/lncRNA:Hsromega/Drak/DUBAI/CG9231/slmb/CG4238/lsn/Drep1/SCCRO3/26-29-p/Ubc6/Prx3/HtrA2/Sirt1/msk/wrd/Akt/MAGE/CG32202/ebi/PDCD-5/Naa20A/CG17019/Cbl/cos/spin/Diap2/syd/SkpA/hid/Ack/porin/puc/vito/morgue/qless/Pdk1/Drep3/GlcT/De…
GO:BP	Wnt signaling pathway	GO:0016055	62/3338	127/12653	4.60547e-08	5.92651e-07	3.17875e-07	tws/HUWE1/Cul1/TER94/flw/Eip63E/dally/fz2/lgs/CG11523/Usp47/aop/dco/Ssdp/Dyrk2/arm/sgg/hyd/Kap3/gro/Axn/Duba/Prosap/slmb/Klp64D/Nulp1/Vps26/Vps35/Wnk/nej/Rho1/RanBP3/sfl/osa/ATP6AP2/CycY/Flo2/Apc/Vang/Rnf146/Wnt5/wls/Bili/Sin3A/SkpA/nmo/skd/ebd1/hyx/dsh/Roc1a/CkIalpha/kto/SoxN/apolpp/Pp1alpha-96A/pygo/nkd/Sulf1/rempA/CtBP/Tnks
GO:BP	protein folding	GO:0006457	66/3338	138/12653	4.72488e-08	6.05363e-07	3.24693e-07	Hsp67Ba/Calr/Cnx99A/prtp/Trap1/Pdi/boca/Sgt/ERp60/14-3-3zeta/Csp/HIP-R/Tbce/ERp44/DnaJ-H/CCT3/nudC/zda/Roe1/CCT2/Hsp60A/Droj2/CCT6/Hsc70Cb/CCT8/Tpr2/TBCC/Pfdn6/Qsox1/CG11999/CG3061/CG11267/mrj/Hsc70-5/CG14207/cyp33/Gp93/CG1890/Pfdn5/CCT7/Pfdn4/Hsc70-1/CCT4/ClpX/Hsc70-4/Moca-cyp/CG2852/CG10565/Cdc37/CG8206/mgr/Pfdn1/p23/CG14715/RIC-3/P58IPK/CG1416/Hsp70Ba/HIP/Pfdn2/Nrd1/CG10907/CG1847/CG12379/Arl2…
GO:BP	stress-activated MAPK cascade	GO:0051403	46/3338	85/12653	4.92996e-08	6.26685e-07	3.36129e-07	HUWE1/ALiX/flw/Sac1/Mnn1/ben/sigmar/rdx/Lkb1/Usp5/raw/p38b/slpr/sgg/lncRNA:Hsromega/crc/MAPk-Ak2/Ptp61F/hep/ebi/alph/Traf6/fmt/Urm1/syd/SkpA/Aplip1/Alg-2/puc/Mekk1/bsk/cpb/slim/Atg9/POSH/Rac1/XNP/Mnat9/PEK/Cdc42/Strip/rpr/Jra/cpa/Mtl/JMJD6
GO:BP	regulation of ubiquitin-dependent protein catabolic process	GO:2000058	40/3338	70/12653	4.93402e-08	6.26685e-07	3.36129e-07	Cul1/TER94/UbcE2H/ari-1/Usp47/dco/fzr/Usp5/Ufl1/EloB/sordd1/sgg/Axn/slmb/Ufd1/Ubc6/poe/ebi/CG8209/sip3/Rnf146/CSN5/CG31855/CG9951/SkpA/STUB1/Cul2/Ufd4/muskelin/Roc1a/CkIalpha/eIF3h/POSH/RanBPM/Kcmf1/CkIIalpha/wds/Sou/rpr/Tnks
GO:BP	negative regulation of smoothened signaling pathway	GO:0045879	35/3338	58/12653	5.09567e-08	6.44426e-07	3.45645e-07	Cul1/TER94/flw/PPP4R2r/Sac1/Npl4/Synj/dco/Herc4/rdx/Nedd4/Ulp1/Nedd8/CG14182/sgg/pic/slmb/Ufd1/Cul3/Pp2A-29B/Su(dx)/Cul4/Su(fu)/cos/sqh/UbcE2M/Roc1a/CkIalpha/Hrs/krz/Pp1alpha-96A/Pp4-19C/Sulf1/Gug/tow
GO:BP	regulation of endocytosis	GO:0030100	37/3338	63/12653	5.83121e-08	7.34282e-07	3.93841e-07	mnb/CASK/Pkc53E/lap/Syx7/Vps29/ArfGAP1/drpr/cindr/aux/garz/Nedd4/Nak/Graf/BicD/drk/Tao/vap/Vps35/tweek/Rab4/Nrx-1/O-fut1/Cortactin/Synd/Sec71/Cbl/Moe/PICK1/Rab5/step/AP-2alpha/nsl1/krz/Uvrag/brat/CG8507
GO:BP	regulated exocytosis	GO:0045055	39/3338	68/12653	6.3171e-08	7.92068e-07	4.24835e-07	Syn/CASK/comt/gammaSnap1/Syt4/shi/alphaSnap/Syx13/Csp/Scamp/Nsf2/Vps45/Vap33/Rop/BicD/hob/NFAT/gammaSnap2/nSyb/Rab3/Exo84/Syx6/Sec10/Rab3GAP1/Sec5/PICK1/Syx17/cpx/Syt1/Cadps/Mctp/Syx8/mop/Rph/stmA/Sec6/stac/Snap25/Sec8
GO:BP	positive regulation of proteasomal protein catabolic process	GO:1901800	34/3338	56/12653	6.38232e-08	7.9684e-07	4.27394e-07	Cul1/TER94/UbcE2H/Xbp1/ari-1/Usp2/dco/fzr/Usp5/EloB/scny/sgg/Axn/slmb/Ufd1/Ubc6/poe/ebi/CG8405/Rnf146/CG31855/SkpA/STUB1/Cul2/Ufd4/muskelin/Roc1a/CkIalpha/POSH/RanBPM/Kcmf1/wds/Sou/Tnks
GO:BP	stress-activated protein kinase signaling cascade	GO:0031098	46/3338	86/12653	7.90459e-08	9.78568e-07	5.24866e-07	HUWE1/ALiX/flw/Sac1/Mnn1/ben/sigmar/rdx/Lkb1/Usp5/raw/p38b/slpr/sgg/lncRNA:Hsromega/crc/MAPk-Ak2/Ptp61F/hep/ebi/alph/Traf6/fmt/Urm1/syd/SkpA/Aplip1/Alg-2/puc/Mekk1/bsk/cpb/slim/Atg9/POSH/Rac1/XNP/Mnat9/PEK/Cdc42/Strip/rpr/Jra/cpa/Mtl/JMJD6
GO:BP	biological process involved in symbiotic interaction	GO:0044403	25/3338	36/12653	7.89201e-08	9.78568e-07	5.24866e-07	TER94/TSG101/shrb/shi/Vps29/Rab11/Sec61alpha/AP-1-2beta/sau/Mvl/Rab3/Sar1/Sec10/Rab35/Vps4/Rab30/betaCOP/Rab5/Rab1/Rab8/Rab7/Rab10/Sec8/Jra/Nup98-96
GO:BP	actin polymerization or depolymerization	GO:0008154	40/3338	71/12653	8.43383e-08	1.0397e-06	5.57655e-07	Arpc3A/Kank/nwk/ALiX/tmod/shi/svr/spoon/dco/capt/SelR/Cip4/p38b/Abl/Atx2/gek/Lam/LRR/Arpc5/CG31715/Arpc2/Ssrp/PsGEF/Cortactin/Vrp1/RhoGAP92B/DAAM/Src64B/HSPC300/Arpc4/cpb/Abi/psidin/twf/Strump/Svil/Gel/Cdc42/cpa/Nup98-96
GO:BP	cellular response to hormone stimulus	GO:0032870	61/3338	126/12653	8.672e-08	1.06459e-06	5.71004e-07	Cul1/Lpin/Hydr2/sima/Usp47/Ns3/GlyP/Mkrn1/Sik3/Rheb/sgg/S6k/G9a/drk/Iswi/Glo1/slmb/TrissinR/raptor/AdipoR/Sirt1/rl/wrd/Ptp61F/Pp2A-29B/Akt/Dsor1/Chd64/chico/Fmr1/gce/Hr39/Pi3K92E/Nurf-38/Cdc37/Lpt/Dh44/SkpA/HDAC4/step/STUB1/srl/CG32638/Pdk1/CG15537/Sik2/Roc1a/Rab10/cnk/TBPH/pzg/nclb/Tor/Pten/Pi3K21B/InR/Nup358/Oatp74D/Thor/Ide/PRAS40
GO:BP	regulation of neuron projection development	GO:0010975	58/3338	118/12653	9.16468e-08	1.12038e-06	6.0093e-07	Hasp/CadN/HUWE1/atl/Dlic/RhoGAPp190/fz2/AMPKalpha/sif/Nedd4/Pak3/nudC/Rheb/Abl/GM130/nudE/Rop/S6k/stan/fra/G9a/Sema2a/fry/raptor/Kr-h1/Ythdf/Akt/Rho1/Sec23/Ret/Sar1/mmy/Fmr1/Vang/tutl/DAAM/Sema1a/Wnt5/Pi3K92E/trc/vvl/LIMK1/dsh/Rab1/Sema1b/DCTN1-p150/Trim9/TBPH/PlexB/Tor/Rac1/Pten/twf/lva/spas/Cdc42/bif/cv-c
GO:BP	negative regulation of cell junction assembly	GO:1901889	29/3338	45/12653	9.22001e-08	1.12247e-06	6.02049e-07	plum/nwk/ena/dbo/stj/Cip4/Abl/sgg/Dad/Mob2/Fak/Nf1/Tao/raptor/Akt/Liprin-gamma/Fmr1/Fsn/Src64B/Rae1/SkpA/Patr-1/TBPH/Pten/hiw/Spn/spas/Syp/Strip
GO:BP	compound eye development	GO:0048749	157/3338	413/12653	9.4679e-08	1.14788e-06	6.15681e-07	mbl/Ras85D/Actbeta/hth/CadN/Sobp/SCAR/siz/dally/bnl/Vav/SP2353/fred/shi/alphaSnap/14-3-3zeta/Nf-YB/Nckx30C/rin/Nhe2/Rab11/hbs/RASSF8/Usp47/Hrb87F/ena/aop/unk/mbt/capt/cindr/aux/CadN2/rdx/kirre/Raf/fzr/Usp5/Liprin-alpha/arm/Asap/jeb/Abl/AP-1gamma/ArfGAP3/Pink1/Mob2/stan/bchs/fra/Efa6/AP-1-2beta/Atx2/Doa/caz/drk/Past1/Pcyt1/Tao/vimar/Fur2/Lam/fry/Frl/spg/noc/Kr-h1/GAA1/Hs3st-B/msk/rl/Amph/Socs36E/C…
GO:BP	axonal transport	GO:0098930	22/3338	30/12653	1.02654e-07	1.23945e-06	6.64793e-07	Marf/Arl8/Khc/Dlc90F/milt/DCTN2-p50/Liprin-alpha/Kap3/Klp64D/Dhc64C/ATP6AP2/Arp10/Fmr1/Klp68D/Sec5/Arp1/Aplip1/Rab1/BORCS5/DCTN5-p25/DCTN1-p150/Miro
GO:BP	terminal branching, open tracheal system	GO:0007430	21/3338	28/12653	1.05954e-07	1.27406e-06	6.83354e-07	Ras85D/Vha26/TSG101/hdc/bnl/CCT3/Raf/Nsf2/Rheb/VhaAC39-1/Lam/noc/rl/Dsor1/Vha100-1/Hph/bs/VhaPPA1-1/aPKC/Tor/Cds
GO:BP	anatomical structure maturation	GO:0071695	90/3338	209/12653	1.07459e-07	1.28239e-06	6.87822e-07	plum/Ras85D/loco/baz/shep/capu/orb/Cul1/TER94/TSG101/flw/shrb/hdc/cic/Khc/14-3-3zeta/Uba1/lost/Hydr2/Rab11/tud/enc/drpr/milt/IKKepsilon/capt/DCTN2-p50/chb/Lkb1/bai/Nrx-IV/Rop/Stam/BicD/stau/CalpA/par-1/slmb/lsn/DCP2/Pat1/Vps28/msps/Dhc64C/Tm1/Pc/alpha-Spec/Ge-1/Dg/Fmr1/Vps4/CG7483/CSN5/Cont/Sec71/Pi3K92E/spn-F/Moe/btz/SMC1/SA/SkpA/Syt1/sqh/Rab6/aPKC/kis/mago/muskelin/Roc1a/aub/bsk/mop/Hrs/vtd/mon…
GO:BP	regulation of Wnt signaling pathway	GO:0030111	53/3338	105/12653	1.07521e-07	1.28239e-06	6.87822e-07	tws/HUWE1/Cul1/TER94/flw/Eip63E/dally/CG11523/Usp47/aop/dco/Ssdp/Dyrk2/sgg/hyd/Kap3/gro/Axn/Duba/Prosap/slmb/Klp64D/Nulp1/Vps26/Vps35/Wnk/nej/Rho1/RanBP3/ATP6AP2/CycY/Flo2/Apc/Rnf146/wls/Bili/Sin3A/SkpA/nmo/skd/ebd1/hyx/Roc1a/CkIalpha/kto/SoxN/apolpp/Pp1alpha-96A/nkd/Sulf1/rempA/CtBP/Tnks
GO:BP	chemical homeostasis	GO:0048878	114/3338	281/12653	1.18208e-07	1.39848e-06	7.50091e-07	Drip/VhaAC45/Pfk/Cbp53E/Rbcn-3A/Hex-A/Nmdar1/Ald1/IscU/LpR1/Actbeta/CG1090/CG10470/PyK/Eno/CG14757/Atpalpha/FASN1/Lpin/SREBP/SNF4Agamma/Men-b/EMRE/kcc/Nckx30C/Uba1/Pgi/CG42542/Nhe2/Tpi/nrv3/Scox/SPoCk/Gapdh2/mfrn/Aps/Sik3/Lkb1/Raf/Rheb/ABCB7/SERCA/S6k/Ctr1A/unc80/VhaAC39-1/Zip99C/CG6523/Pdfr/Lamtor1/AGBE/ZnT49B/Npc2a/Npc1a/PMCA/Mvl/emei/Sap-r/Fer1HCH/AdipoR/Grx1/Wnk/Fatp1/Stim/SelG/wrd/ktub/Syx5/…
GO:BP	positive regulation of ubiquitin-dependent protein catabolic process	GO:2000060	34/3338	57/12653	1.18176e-07	1.39848e-06	7.50091e-07	Cul1/TER94/UbcE2H/ari-1/dco/fzr/Usp5/EloB/sordd1/sgg/Axn/slmb/Ufd1/Ubc6/poe/ebi/sip3/Rnf146/CG31855/CG9951/SkpA/STUB1/Cul2/Ufd4/muskelin/Roc1a/CkIalpha/POSH/RanBPM/Kcmf1/wds/Sou/rpr/Tnks
GO:BP	receptor-mediated endocytosis	GO:0006898	36/3338	62/12653	1.31679e-07	1.54539e-06	8.28886e-07	Dap160/LpR2/EndoB/LpR1/Pkc53E/shi/lap/Synj/lqf/cindr/DCTN2-p50/aux/Nedd4/Rlip/Nak/EndoA/Graf/BicD/drk/AP-2sigma/CG8176/Cortactin/Su(dx)/Cbl/PICK1/Rab5/Syt1/AP-2alpha/Rab7/Hrs/krz/Cubn/Uvrag/Dab/Rme-8/CG8507
GO:BP	vacuolar transport	GO:0007034	36/3338	62/12653	1.31679e-07	1.54539e-06	8.28886e-07	comt/TSG101/shrb/Arl8/Vta1/Mvb12/AP-1gamma/CG30423/car/Stam/VhaAC39-1/lsn/Ndfip/Vps28/Vps16A/Mon1/CHMP2B/Vps37B/Vps20/Vamp7/Su(dx)/ema/CG15012/p/spin/Vps52/Rab7/mop/Vsp37A/Vps13/Vps8/Vps13D/Chmp1/Vps24/or/Lerp
GO:BP	glycoprotein metabolic process	GO:0009100	72/3338	158/12653	1.38496e-07	1.60612e-06	8.61461e-07	FucT6/GCS2alpha/FucTA/Mgat2/Dad1/Alg11/Hs6st/CG9395/Ost48/CG4341/Pabp2/sff/CG33303/CG33774/Pgant2/CG3662/CG3253/Mgat4a/C1GalTA/CG15651/CG31690/alpha-Man-Ib/Pgant5/Xxylt/CG9536/GalT1/CG8668/Stt3A/wol/GCS1/sxc/crc/meigo/Csgalnact/senju/Ostgamma/CG3149/FucTC/GCS2beta/Dpm3/sfl/Edem1/O-fut1/mmy/CG32276/alpha-Man-IIa/ttv/GlcAT-S/beta3GalTII/CG9662/Tango14/Alg3/Alg2/CG5276/Pgant35A/alpha-Man-IIb/Uggt/CG…
GO:BP	modulation of chemical synaptic transmission	GO:0050804	72/3338	158/12653	1.38496e-07	1.60612e-06	8.61461e-07	Sap47/Cbp53E/Frq1/CASK/comt/Atg1/Frq2/Nlg4/Syt4/qvr/shi/Csp/CG6329/Sod2/stas/Cat/jeb/kek6/eIF4E1/Ih/beta-Spec/BicD/Nmnat/cdm/Nlg2/NFAT/dj-1beta/na/Smn/Rab3/rl/Akt/Nrx-1/alpha-Spec/Dg/chico/Fmr1/Nadsyn/Rab3-GAP/Src64B/Dys/Pi3K92E/Rab3GAP1/pum/dysc/Neto/cpx/Syt1/CG7781/Rdl/BTBD9/Mctp/Ekar/Alk/mop/Pten/hiw/crok/Fbxl4/Ir93a/Galphaq/Nlg3/spas/Snap25/FMRFaR/Syp/Grik/Cdc42/SH3PX1/Thor/cv-c/TkR99D
GO:BP	regulation of trans-synaptic signaling	GO:0099177	72/3338	158/12653	1.38496e-07	1.60612e-06	8.61461e-07	Sap47/Cbp53E/Frq1/CASK/comt/Atg1/Frq2/Nlg4/Syt4/qvr/shi/Csp/CG6329/Sod2/stas/Cat/jeb/kek6/eIF4E1/Ih/beta-Spec/BicD/Nmnat/cdm/Nlg2/NFAT/dj-1beta/na/Smn/Rab3/rl/Akt/Nrx-1/alpha-Spec/Dg/chico/Fmr1/Nadsyn/Rab3-GAP/Src64B/Dys/Pi3K92E/Rab3GAP1/pum/dysc/Neto/cpx/Syt1/CG7781/Rdl/BTBD9/Mctp/Ekar/Alk/mop/Pten/hiw/crok/Fbxl4/Ir93a/Galphaq/Nlg3/spas/Snap25/FMRFaR/Syp/Grik/Cdc42/SH3PX1/Thor/cv-c/TkR99D
GO:BP	positive regulation of macromolecule biosynthetic process	GO:0010557	173/3338	466/12653	1.40347e-07	1.62117e-06	8.69534e-07	mnb/tou/E2f1/exd/hth/Larp4B/ADD1/mxt/CG4612/Lpin/Ctr9/SREBP/lgs/scf/Wbp2/Nf-YB/Xbp1/sno/CG18766/Pabp2/sima/Kdm5/spoon/trh/Mkrn1/Cdk12/Ssdp/Dp1/Hcf/Su(var)205/not/RYBP/arm/bon/Rheb/Crtc/dmpd/CG9776/atms/mam/orb2/Camta/MBD-R2/La/Iswi/key/CG12054/crc/Axud1/Ssb-c31a/Cf2/fry/Sgf11/Met/REPTOR-BP/CG10555/senju/Eaf/Rtf1/nej/Rcd1/CG1603/hep/osa/MED19/Mad/mmy/Fmr1/larp/gce/CycK/MTF-1/rswl/Asx/Hr3/Gcn5/Sec1…
GO:BP	response to oxidative stress	GO:0006979	67/3338	144/12653	1.41619e-07	1.62945e-06	8.73976e-07	loco/Trap1/Atg1/Sirup/Sdhaf3/Chchd2/MsrA/Mnn1/ben/SdhC/Sod2/Cat/hang/SelR/p38b/Crtc/Pink1/ND-20/S6k/ATPsynD/ND-SGDH/Nf1/dj-1beta/CG32262/ND-B17.2/Prx3/Grx1/Trx-2/sun/Atg18b/rl/fbl/inaE/Akt/Egm/ebi/MTF-1/Jafrac2/alph/Pi3K92E/Gyc89Da/iPLA2-VIA/Ucp4A/Naprt/srl/Fer2/puc/Itpr/Mekk1/bsk/CG5056/Atg9/Cyt-b5/PCNA2/ND-B14/Jafrac1/Naam/scyl/chrb/sesB/Keap1/InR/CG14777/CG15547/Thor/CG1662/Idh
GO:BP	cellular response to oxygen-containing compound	GO:1901701	92/3338	216/12653	1.44216e-07	1.65285e-06	8.86525e-07	Cul1/Sirup/Syt4/5-HT7/FASN1/Lpin/sima/Usp47/Ns3/Sod2/GlyP/Mkrn1/Sik3/GlyS/Rheb/p38b/slpr/Crtc/sgg/S6k/Stat92E/CG4390/G9a/drk/Lamtor1/Iswi/5-HT2A/Glo1/slmb/dj-1beta/CG32262/raptor/Sirt1/rl/Lamtor3/wrd/Ptp61F/Pp2A-29B/Akt/Dsor1/chico/Blimp-1/Fmr1/Drat/Sec13/DopEcR/Pi3K92E/Nurf-38/PICK1/Akap200/PRL-1/Cdc37/Lpt/SkpA/HDAC4/RagA-B/step/STUB1/5-HT2B/Syt1/srl/CG32638/Itpr/Pdk1/Sik2/Roc1a/Rab10/Utx/bsk/CG…
GO:BP	regulation of protein-containing complex assembly	GO:0043254	50/3338	98/12653	1.58719e-07	1.81199e-06	9.71883e-07	Arpc3A/Kank/nwk/tmod/mxt/shi/svr/spoon/dco/chb/Usp5/Su(var)205/Cip4/p38b/cal1/Dad/Efa6/car/Atx2/gek/Lam/LRR/Arpc5/cnn/CG31715/msps/Vps16A/Arpc2/Sec23/Ssrp/Sar1/PsGEF/Cortactin/Vrp1/RhoGAP92B/DAAM/Rpt4/Arpc4/cpb/mv/twf/Svil/Mnat9/4E-T/Cenp-C/Gel/Cdc42/Thor/cpa/Nup98-96
GO:BP	protein modification by small protein removal	GO:0070646	37/3338	65/12653	1.78925e-07	2.03476e-06	1.09136e-06	Usp7/CSN7/Usp2/Usp47/CG7332/Usp5/not/Ulp1/scny/puf/CG7222/Den1/alien/Duba/DUBAI/Uch/Usp30/Usp32/Usp15-31/CG8209/CSN6/CG4968/Usp14/Asx/CSN5/CG2224/Uch-L5/Rpn11/krz/Usp1/Usp10/pira/faf/CSN3/CSN1b/e(y)2/CSN8
GO:BP	post-embryonic animal morphogenesis	GO:0009886	180/3338	490/12653	1.82179e-07	2.06316e-06	1.1066e-06	Ras85D/Actbeta/hth/Atg1/TER94/flw/Gclc/dally/hdc/cic/zip/Hs6st/pnut/Lpin/fz2/lgs/alphaSnap/Uba1/MED24/RhoGAP19D/Mnn1/anchor/sno/svr/ct/drosha/drpr/unk/Idh3b/Nedd4/Raf/fzr/deltaCOP/EloB/arm/Cip4/p38b/slpr/sds22/sgg/Dad/hyd/mam/stan/Stat92E/cib/gammaCOP/Axn/drk/Past1/Drak/Pcyt1/par-1/Dd/l(3)psg2/Grasp65/Atg17/fry/raptor/peng/RhoGAP68F/Hs3st-B/KLHL18/cv/msk/rl/Socs36E/Stim/Cul3/fbl/Rho1/DCAF12/hep/s…
GO:BP	membrane fusion	GO:0061025	39/3338	70/12653	1.8283e-07	2.06316e-06	1.1066e-06	comt/TER94/atl/Syt4/Arl8/Syx7/alphaSnap/Syx13/aus/Rab11/Vps45/car/nSyb/Bet1/Vps16A/Rab3/Sec22/Syx6/Blos1/Syx5/CG6454/Blos2/Snx6/Vamp7/Tusp/Sec5/Rab5/Syx17/Syt1/Syx8/Rab8/Rab7/Gos28/mv/Uvrag/Vps8/p47/Snap25/p115
GO:BP	positive regulation of multicellular organismal process	GO:0051240	91/3338	214/12653	1.84072e-07	2.06922e-06	1.10985e-06	Dap160/mnb/Hk/Ras85D/Actbeta/Octbeta2R/atl/gzl/qvr/Sec24CD/Nf-YB/ari-1/Usp2/mbt/Mkrn1/sif/Nedd4/Pak3/Raf/nudC/Rheb/p38b/Ih/homer/GM130/nudE/Sdc/Pink1/stan/bchs/tral/Arp2/G9a/caz/Nf1/5-HT2A/stau/RhoGAP68F/Smn/Sirt1/cv/rl/Akt/Sec23/Arp3/wit/Sar1/chico/Mad/Fmr1/simj/Vang/RhoGAP92B/Synd/Wnt5/Pi3K92E/RasGAP1/oc/Cdc37/sNPF-R/nmo/step/BTBD9/dsh/Arfip/aPKC/Itpr/Acer/Pdk1/kis/Rab1/tkv/wap/mop/cpb/DCTN1-p1…
GO:BP	response to oxygen-containing compound	GO:1901700	145/3338	379/12653	1.87405e-07	2.09865e-06	1.12564e-06	Pfk/Nmdar1/Syn/CASK/Actbeta/Cul1/PyK/Sirup/Bacc/Syt4/5-HT7/FASN1/Lpin/MED24/sima/Usp47/Ns3/Sod2/GlyP/dco/Mkrn1/Cat/hang/Idh3b/Sik3/eag/GlyS/Rheb/p38b/slpr/Crtc/homer/sgg/ND-20/S6k/Stat92E/CG4390/Efa6/G9a/drk/ND-SGDH/Lamtor1/Iswi/5-HT2A/Tao/CG5412/Glo1/slmb/l(3)psg2/vap/dj-1beta/CG32262/AnxB11/Clic/raptor/Kr-h1/Vps35/Sirt1/rig/rl/Lamtor3/Stim/wrd/ktub/Ptp61F/Pp2A-29B/Akt/Edem1/Dsor1/chico/Blimp-1/…
GO:BP	regulation of proteolysis	GO:0030162	72/3338	159/12653	1.8846e-07	2.10243e-06	1.12766e-06	Cul1/TER94/UbcE2H/Cp1/Xbp1/ari-1/hbs/Usp2/Usp47/dco/IKKepsilon/rdx/fzr/Usp5/Nedd8/Ufl1/EloB/sordd1/scny/Cyt-c-p/sgg/lncRNA:Hsromega/Axn/DUBAI/slmb/Ufd1/26-29-p/Ubc6/HtrA2/Cul3/poe/CG7058/CG13404/ebi/pen-2/CG8209/ScsbetaA/CG8405/sip3/Usp14/Rnf146/Jafrac2/CSN5/CG17019/CG31855/Diap2/CG9951/SkpA/hid/STUB1/Cul2/Ufd4/muskelin/Roc1a/CkIalpha/eIF3h/krz/REG/POSH/Tor/RanBPM/Kcmf1/RnrS/Spn55B/CkIIalpha/wds/…
GO:BP	developmental maturation	GO:0021700	100/3338	241/12653	1.95894e-07	2.17709e-06	1.16771e-06	plum/Ras85D/loco/baz/shep/capu/orb/Cul1/TER94/TSG101/flw/shrb/Sac1/hdc/cic/Khc/14-3-3zeta/Uba1/lost/Hydr2/ben/Rab11/tud/enc/drpr/milt/IKKepsilon/capt/DCTN2-p50/chb/Lkb1/bai/Vap33/p38b/Nrx-IV/Rop/Stam/BicD/Nlg2/stau/CalpA/par-1/slmb/lsn/DCP2/Pat1/Vps28/msps/Dhc64C/Tm1/Pc/alpha-Spec/Ge-1/CG1407/Dg/Fmr1/Vps4/CG7483/CSN5/Cont/Sec71/Pi3K92E/spn-F/Sec5/Moe/btz/SMC1/SA/SkpA/Syt1/sqh/Rab6/aPKC/kis/mago/m…
GO:BP	positive regulation of intracellular signal transduction	GO:1902533	84/3338	194/12653	2.12401e-07	2.35165e-06	1.26133e-06	Ras85D/ALiX/siz/Vav/Ccm3/Lpin/CG9098/14-3-3zeta/Nf-YB/Mnn1/ben/Usp47/Sur-8/sigmar/dco/CG34393/rdx/Raf/jeb/Rheb/slpr/lig/Clbn/Efa6/pod1/lncRNA:Hsromega/drk/Pdfr/RtGEF/Lamtor1/Tao/crc/wcy/spg/Leash/Orai/RhoGAP1A/Cad96Ca/Lamtor3/CG7369/Akt/alpha-Spec/PsGEF/Fnta/chico/AIMP3/Sec13/Socs16D/Src64B/DopEcR/Traf6/Rae1/Pi3K92E/Cdc37/M1BP/sNPF-R/RagA-B/step/Hmgcr/Alg-2/Pdk1/Alk/Mekk1/cnk/slim/Atg9/CG4853/POS…
GO:BP	regulation of lamellipodium organization	GO:1902743	16/3338	19/12653	2.21626e-07	2.44455e-06	1.31116e-06	SCAR/ena/Abl/Naus/LRR/Tm1/hep/Arp3/HSPC300/aPKC/cpb/Rac1/psidin/twf/Cdc42/cpa
GO:BP	cell maturation	GO:0048469	88/3338	206/12653	2.28592e-07	2.49327e-06	1.33729e-06	plum/Ras85D/loco/baz/shep/capu/orb/Cul1/TER94/TSG101/flw/shrb/hdc/cic/Khc/14-3-3zeta/Uba1/lost/Hydr2/Rab11/tud/enc/drpr/milt/IKKepsilon/capt/DCTN2-p50/chb/Lkb1/bai/Rop/Stam/BicD/stau/CalpA/par-1/slmb/lsn/DCP2/Pat1/Vps28/msps/Dhc64C/Tm1/Pc/alpha-Spec/Ge-1/Dg/Fmr1/Vps4/CG7483/CSN5/Sec71/Pi3K92E/spn-F/Moe/btz/SMC1/SA/SkpA/Syt1/sqh/Rab6/aPKC/kis/mago/muskelin/Roc1a/aub/bsk/mop/Hrs/vtd/mon2/Uvrag/Sox1…
GO:BP	negative regulation of synapse assembly	GO:0051964	28/3338	44/12653	2.28099e-07	2.49327e-06	1.33729e-06	plum/nwk/ena/dbo/stj/Cip4/Abl/sgg/Dad/Mob2/Fak/Nf1/Tao/raptor/Akt/Liprin-gamma/Fmr1/Fsn/Src64B/Rae1/SkpA/Patr-1/TBPH/hiw/Spn/spas/Syp/Strip
GO:BP	negative regulation of synapse organization	GO:1905809	28/3338	44/12653	2.28099e-07	2.49327e-06	1.33729e-06	plum/nwk/ena/dbo/stj/Cip4/Abl/sgg/Dad/Mob2/Fak/Nf1/Tao/raptor/Akt/Liprin-gamma/Fmr1/Fsn/Src64B/Rae1/SkpA/Patr-1/TBPH/hiw/Spn/spas/Syp/Strip
GO:BP	nuclear export	GO:0051168	47/3338	91/12653	2.31377e-07	2.50502e-06	1.3436e-06	Ns3/Abl/Clbn/pix/emb/Nmd3/CG18259/CG11123/Ran/swm/CG9915/Ranbp16/Arp3/RanBP3/LTV1/SF2/Ranbp21/CG6961/CG32409/Rae1/Nxt1/Nup93-2/Moe/Hph/tho2/ZC3H3/aPKC/tex/Cbp80/cpb/Nup154/RanBPM/Strump/Ref1/CG13185/Vhl/thoc6/SWIP/Sem1/Nup358/ebo/mbo/e(y)2/Nup75/cpa/Nup98-96/thoc7
GO:BP	negative regulation of nervous system development	GO:0051961	47/3338	91/12653	2.31377e-07	2.50502e-06	1.3436e-06	plum/nwk/tws/CadN/hdc/Ctr9/ena/dbo/stj/Cip4/Abl/sgg/Dad/Mob2/Fak/Nf1/Sema2a/Tao/slmb/raptor/Hs3st-B/Ythdf/Akt/MAGE/osa/Liprin-gamma/Fmr1/Fsn/Src64B/Sema1a/Rae1/mor/SkpA/Sema1b/Patr-1/TBPH/hiw/brm/Spn/Ntan1/Bap60/brat/spas/sd/Syp/Strip/bif
GO:BP	ribonucleoside triphosphate metabolic process	GO:0009199	38/3338	68/12653	2.35875e-07	2.53501e-06	1.35968e-06	Gapdh1/Pfk/Hex-A/Ald1/PyK/Eno/blw/ATPsyngamma/Pgi/ATPsynbeta/Tpi/Scox/Gapdh2/ATPsynF/Ak1/ATPsynD/CLS/Pgk/ATPsynCF6/sun/Pglym78/Vha68-1/Dg/CG11035/ras/ATPsyndelta/Ack/ATPsynbetaL/ATPsynE/ATPsynO/ATPsynG/ATPsynC/CTPsyn/r/awd/CG3337/sesB/CG7059
GO:BP	organelle membrane fusion	GO:0090174	38/3338	68/12653	2.35875e-07	2.53501e-06	1.35968e-06	comt/TER94/atl/Syt4/Arl8/Syx7/alphaSnap/Syx13/aus/Rab11/Vps45/car/nSyb/Bet1/Vps16A/Rab3/Sec22/Syx6/Blos1/Syx5/CG6454/Blos2/Snx6/Vamp7/Tusp/Sec5/Rab5/Syx17/Syt1/Syx8/Rab8/Rab7/Gos28/mv/Uvrag/Vps8/Snap25/p115
GO:BP	wing disc development	GO:0035220	159/3338	425/12653	2.58046e-07	2.76316e-06	1.48205e-06	Ras85D/Actbeta/hth/flw/Gclc/gammaSnap1/dally/cic/zip/Hs6st/pnut/Lpin/fz2/lgs/alphaSnap/anchor/sno/svr/Mpcp2/ct/drpr/unk/capt/dop/Snx3/Nedd4/Raf/EloB/arm/Cip4/puf/p38b/sgg/Dad/hyd/mam/stan/Stat92E/tara/Axn/G9a/drk/Past1/pic/Drak/Pcyt1/par-1/Dd/sxc/Grasp65/Ndfip/fry/CG14073/peng/noc/nmd/Hs3st-B/Smr/cv/Wnk/msk/rl/Socs36E/Stim/Cul3/fbl/Rho1/Pp2B-14D/sfl/Pkn/ebi/osa/ATP6AP2/Dg/Mad/EloA/CG8405/nord/Van…
GO:BP	morphogenesis of a branching epithelium	GO:0061138	35/3338	61/12653	2.94071e-07	3.13747e-06	1.68282e-06	Ras85D/Vha26/baz/TSG101/hdc/bnl/Ptp10D/CCT3/Raf/Nsf2/arm/Rheb/dmt/Ptp4E/gammaCOP/VhaAC39-1/Lam/noc/rl/Dsor1/Vha100-1/Sec5/Moe/Hph/bs/VhaPPA1-1/CG16952/aPKC/caps/Tor/Cds/sty/form3/stac/Cdc42
GO:BP	apoptotic process	GO:0006915	110/3338	273/12653	2.96089e-07	3.14755e-06	1.68823e-06	mbl/trus/Coa8/Ras85D/E2f1/cathD/Cul1/CG2918/Atg1/TER94/Drep4/futsch/pnut/Tango9/Cp1/Nf-YB/Dp/alpha4GT1/sigmar/tub/dco/rdx/Lkb1/Raf/Usp5/RYBP/Der-1/scny/zda/dmt/Bruce/CG9922/Pink1/Clbn/Den1/Tspo/Ubr3/Hsp60A/pix/lncRNA:Hsromega/Drak/CG10209/Tao/DUBAI/CG9231/slmb/CG4238/lsn/Drep1/SCCRO3/26-29-p/Ubc6/Prx3/HtrA2/Sirt1/msk/wrd/Akt/MAGE/CG32202/Ire1/ebi/CG17230/PDCD-5/Naa20A/crq/Jafrac2/CG17019/CG12384/…
GO:BP	lamellipodium assembly	GO:0030032	18/3338	23/12653	2.98682e-07	3.16366e-06	1.69686e-06	SCAR/ena/Abl/Unc-115a/Tm1/hep/Arp3/HSPC300/aPKC/cpb/Abi/Rac1/psidin/twf/Cdc42/SH3PX1/cpa/Mtl
GO:BP	vesicle fusion	GO:0006906	37/3338	66/12653	3.04129e-07	3.20976e-06	1.72159e-06	comt/TER94/Syt4/Arl8/Syx7/alphaSnap/Syx13/aus/Rab11/Vps45/car/nSyb/Bet1/Vps16A/Rab3/Sec22/Syx6/Blos1/Syx5/CG6454/Blos2/Snx6/Vamp7/Tusp/Sec5/Rab5/Syx17/Syt1/Syx8/Rab8/Rab7/Gos28/mv/Uvrag/Vps8/Snap25/p115
GO:BP	respiratory electron transport chain	GO:0022904	44/3338	84/12653	3.32064e-07	3.49202e-06	1.87299e-06	SdhA/Cyt-c1/ND-B14.5B/GC1/Chchd2/ND-75/CG14757/ND-B14.5A/cype/UQCR-6.4/SdhB/SdhC/Gpo1/ND-B22/SdhD/ND-51/CG42376/Cyt-c-p/COX4/UQCR-Q/ND-42/Pink1/RFeSP/levy/ND-49/COX5A/dj-1beta/ND-13B/ND-B17.2/ND-B17/CG6115/ND-19/ND-ASHI/COX5B/COX7A/UQCR-C2/CG7630/CG12895/ND-13A/ND-24/UQCR-11/COX8/aralar1/ND-23
GO:BP	organelle fusion	GO:0048284	47/3338	92/12653	3.5282e-07	3.69705e-06	1.98295e-06	comt/TER94/atl/Marf/Syt4/Arl8/Syx7/alphaSnap/Syx13/aus/Rab11/Vps45/Pink1/car/Chchd3/rho-7/nSyb/msps/Bet1/Vps16A/Rab3/Sec22/Syx6/Blos1/Syx5/CG6454/Blos2/Snx6/Sps1/Vamp7/CG3862/Tusp/Sec5/Rab5/Syx17/Syt1/Syx8/Miga/Rab8/Rab7/tacc/Gos28/mv/Uvrag/Vps8/Snap25/p115
GO:BP	response to hormone	GO:0009725	62/3338	133/12653	3.76678e-07	3.933e-06	2.10951e-06	Cul1/Lpin/Hydr2/sima/Usp47/Ns3/GlyP/Mkrn1/Sik3/Rheb/sgg/S6k/G9a/drk/Iswi/Glo1/slmb/TrissinR/raptor/AdipoR/Sirt1/rl/wrd/Ptp61F/Pp2A-29B/Akt/Dsor1/Chd64/chico/Fmr1/gce/Hr39/Pi3K92E/Nurf-38/Cdc37/Lpt/Dh44/SkpA/HDAC4/step/STUB1/srl/CG32638/Cpr/Pdk1/CG15537/Sik2/Roc1a/Rab10/cnk/TBPH/pzg/nclb/Tor/Pten/Pi3K21B/InR/Nup358/Oatp74D/Thor/Ide/PRAS40
GO:BP	endocytic recycling	GO:0032456	25/3338	38/12653	3.99212e-07	4.15351e-06	2.22778e-06	sp3/CG18659/Rab11/Vps53/IKKepsilon/Snx3/Past1/RhoGAP68F/Ubc6/Vps26/Vps35/Exo84/Rho1/Rab35/Sec5/Vps52/Sbf/Vps50/Rab7/mop/Hrs/Tor/mtm/Sec6/Sec15
GO:BP	endoplasmic reticulum organization	GO:0007029	28/3338	45/12653	4.51933e-07	4.68541e-06	2.51308e-06	Msp300/TER94/atl/Marf/Sec24CD/ReepA/ari-1/EMC8-9/EMC1/Vap33/tral/wol/msps/CG10674/Sec23/Sar1/EMC6/Rab3GAP1/EMC4/CG32022/Arl6IP1/ReepB/Bsg/Arl1/jagn/pcx/EMC3/CG9853
GO:BP	neurotransmitter transport	GO:0006836	60/3338	128/12653	4.56268e-07	4.71369e-06	2.52824e-06	Frq1/Syn/CASK/comt/Frq2/gammaSnap1/Syt4/Arl8/shi/alphaSnap/Syx13/Csp/Scamp/CG43066/Nsf2/Vps45/Vap33/Ih/Rop/BicD/NFAT/gammaSnap2/nSyb/CanB2/Rab3/Exo84/Syx6/nej/DCAF12/Rep/Sec10/veli/Rab3-GAP/HDAC6/Gdi/rogdi/Dys/Rab3GAP1/Hsc70-4/Sec5/Syx17/cpx/Syt1/Cadps/Mctp/Syx8/mop/DCTN1-p150/Rph/stmA/Sec6/stac/Rab3-GEF/Arl1/VGAT/Snap25/Cdc42/SH3PX1/Sec8/Arl2
GO:BP	NADH dehydrogenase complex assembly	GO:0010257	24/3338	36/12653	4.72438e-07	4.84662e-06	2.59954e-06	ND-B14.7/ND-B14.5B/ND-B22/ND-B18/ND-ACP/CG11722/ND-20/CG13392/ND-SGDH/CG3262/ND-B15/ND-18/ND-B17.2/ND-B16.6/ND-19/ND-ASHI/ND-39/CG5569/ND-B12/ND-B14/ND-15/CG3270/ND-PDSW/ND-23
GO:BP	mitochondrial respiratory chain complex I assembly	GO:0032981	24/3338	36/12653	4.72438e-07	4.84662e-06	2.59954e-06	ND-B14.7/ND-B14.5B/ND-B22/ND-B18/ND-ACP/CG11722/ND-20/CG13392/ND-SGDH/CG3262/ND-B15/ND-18/ND-B17.2/ND-B16.6/ND-19/ND-ASHI/ND-39/CG5569/ND-B12/ND-B14/ND-15/CG3270/ND-PDSW/ND-23
GO:BP	neuron remodeling	GO:0016322	33/3338	57/12653	4.81106e-07	4.91834e-06	2.63801e-06	plum/shep/Cul1/TSG101/shrb/hdc/Uba1/drpr/IKKepsilon/Stam/CalpA/slmb/Vps28/Dhc64C/Pc/Fmr1/Vps4/Sec71/Pi3K92E/spn-F/SMC1/SA/SkpA/kis/Roc1a/bsk/mop/Hrs/vtd/Uvrag/Sox14/InR/Pi3K59F
GO:BP	cellular homeostasis	GO:0019725	91/3338	218/12653	5.00074e-07	5.0945e-06	2.73249e-06	mbl/VhaAC45/Cbp53E/Rbcn-3A/Hex-A/alc/CG7484/IscU/comt/CG1090/CG10470/TER94/SP2353/Atpalpha/FASN1/CG8993/EMRE/kcc/Nckx30C/CG42542/Csp/Nhe2/nrv3/Scox/SPoCk/CG7430/capt/Raf/Usp5/ABCB7/SERCA/Ctr1A/Gyf/Trxr-1/VhaAC39-1/Zip99C/CG6523/AGBE/CG3719/ZnT49B/PMCA/vimar/emei/Pgk/Fer1HCH/Prx3/Trx-2/Stim/SelG/Syx5/Manf/MICU3/SelT/ebi/Nhe1/Vha68-1/Dg/CG10362/Sln/Jafrac2/CG17593/Nhe3/Vha100-1/Dys/dysc/ClC-c/ORMDL…
GO:BP	positive regulation of MAPK cascade	GO:0043410	37/3338	67/12653	5.07339e-07	5.15063e-06	2.7626e-06	Ras85D/ALiX/Vav/Ccm3/Nf-YB/Mnn1/ben/Usp47/sigmar/rdx/Raf/jeb/slpr/lncRNA:Hsromega/drk/Lamtor1/crc/spg/DopEcR/Traf6/Cdc37/M1BP/sNPF-R/step/Alg-2/Alk/Mekk1/cnk/slim/Atg9/POSH/Rac1/PEK/Rab3-GEF/InR/Cdc42/rpr
GO:BP	determination of adult lifespan	GO:0008340	76/3338	174/12653	5.22403e-07	5.28528e-06	2.83482e-06	sm/Ras85D/MsrA/Atpalpha/Dlc90F/VhaSFD/Mnn1/Tpi/SdhC/Coq7/aop/Sod2/GlyP/Cat/hook/Lkb1/cm/fwd/p38b/CG11700/Ih/ND-20/Men/S6k/Tspo/levy/car/Trxr-1/ATPsynD/ND-SGDH/Nf1/Pcyt1/AGBE/CalpA/Sirt4/raptor/Prx3/Trx-2/Sirt1/sun/rl/SelG/Sirt2/CG8155/hep/Rpn1/Edem1/Dsor1/Prosalpha6/chico/miple2/Mtpbeta/Sam-S/alph/Sin3A/CG42663/ATPsynbetaL/puc/kis/mthl8/Jafrac1/Naam/POSH/Tor/mip120/Prosalpha5/Atg8a/sesB/mys/InR/a…
GO:BP	cell population proliferation	GO:0008283	123/3338	316/12653	5.52988e-07	5.55639e-06	2.98023e-06	Dap160/Ras85D/loco/E2f1/Actbeta/hth/baz/tws/CSN7/bnl/Pkc53E/Ctr9/fz2/Rbp9/Syx7/Tango9/Mnn1/enc/drosha/Sod2/tub/Cat/Lkb1/Nedd4/Sxl/Raf/Madm/Nedd8/Rheb/sds22/Stat92E/alien/hts/Doa/Prosap/key/slmb/clu/Axud1/Lam/Smn/cnn/msps/rl/Dhc64C/Cul3/CG17059/Ptp61F/Akt/MAGE/Rho1/alpha-Spec/osa/Bgb/chico/Fmr1/nord/Apc/S/CSN5/vsg/flfl/dome/Ing5/Rae1/Cbl/Pi3K92E/ric8a/Nurf-38/Moe/Sin3A/mor/mats/hfp/Cdc37/Rab5/CG67…
GO:BP	ribonucleoside triphosphate biosynthetic process	GO:0009201	23/3338	34/12653	5.52461e-07	5.55639e-06	2.98023e-06	blw/ATPsyngamma/ATPsynbeta/Scox/ATPsynF/ATPsynD/CLS/ATPsynCF6/sun/CG11035/ras/ATPsyndelta/Ack/ATPsynbetaL/ATPsynE/ATPsynO/ATPsynG/ATPsynC/CTPsyn/r/awd/CG3337/sesB
GO:BP	negative regulation of synaptic assembly at neuromuscular junction	GO:0045886	27/3338	43/12653	5.57439e-07	5.56301e-06	2.98378e-06	plum/nwk/ena/dbo/stj/Cip4/Abl/sgg/Dad/Mob2/Fak/Nf1/Tao/raptor/Akt/Liprin-gamma/Fmr1/Fsn/Src64B/Rae1/SkpA/Patr-1/TBPH/hiw/spas/Syp/Strip
GO:BP	negative regulation of neuromuscular junction development	GO:1904397	27/3338	43/12653	5.57439e-07	5.56301e-06	2.98378e-06	plum/nwk/ena/dbo/stj/Cip4/Abl/sgg/Dad/Mob2/Fak/Nf1/Tao/raptor/Akt/Liprin-gamma/Fmr1/Fsn/Src64B/Rae1/SkpA/Patr-1/TBPH/hiw/spas/Syp/Strip
GO:BP	RNA localization	GO:0006403	82/3338	192/12653	5.90917e-07	5.87712e-06	3.15226e-06	capu/orb/HUWE1/TER94/Dlic/Khc/VhaSFD/lost/Rab11/tud/enc/RASSF8/Bet3/AGO2/DCTN2-p50/CG8671/Rop/BicD/stau/par-1/mRpL18/Sap-r/CG18259/lsn/DCP2/Pat1/msps/CG5382/swm/Dhc64C/Tm1/CG1463/CG9915/Ge-1/Fmr1/SF2/CG7483/Ranbp21/Srp72/CG6961/spn-A/Rae1/Nxt1/Nup93-2/spn-F/Moe/btz/Syt1/tho2/Rab6/ZC3H3/aPKC/CG4572/mago/tex/Cbp80/Rab7/aub/DCTN1-p150/Nup154/Sry-delta/tsu/smg/Ref1/CkIIalpha/CG8204/Arl1/thoc6/asun/Se…
GO:BP	instar larval or pupal morphogenesis	GO:0048707	173/3338	475/12653	6.02475e-07	5.97183e-06	3.20306e-06	Ras85D/Actbeta/hth/Atg1/TER94/flw/Gclc/dally/hdc/cic/zip/Hs6st/pnut/Lpin/fz2/lgs/alphaSnap/Uba1/MED24/RhoGAP19D/Mnn1/anchor/sno/svr/ct/drosha/drpr/unk/Idh3b/Nedd4/Raf/fzr/EloB/arm/Cip4/p38b/slpr/sds22/sgg/Dad/hyd/mam/stan/Stat92E/Axn/drk/Past1/Drak/Pcyt1/par-1/Dd/l(3)psg2/Grasp65/Atg17/fry/raptor/peng/RhoGAP68F/Hs3st-B/KLHL18/cv/msk/rl/Socs36E/Stim/Cul3/fbl/Rho1/DCAF12/hep/sfl/Pkn/ebi/osa/ATP6AP2…
GO:BP	establishment or maintenance of apical/basal cell polarity	GO:0035088	22/3338	32/12653	6.36833e-07	6.27002e-06	3.363e-06	alc/Ras85D/baz/TSG101/Syx7/AMPKalpha/Exo84/Dhc64C/Rho1/Dg/Vps4/yrt/veli/Cont/Moe/Rab5/aPKC/DCTN1-p150/Patj/trol/gkt/TBCB
GO:BP	establishment or maintenance of bipolar cell polarity	GO:0061245	22/3338	32/12653	6.36833e-07	6.27002e-06	3.363e-06	alc/Ras85D/baz/TSG101/Syx7/AMPKalpha/Exo84/Dhc64C/Rho1/Dg/Vps4/yrt/veli/Cont/Moe/Rab5/aPKC/DCTN1-p150/Patj/trol/gkt/TBCB
GO:BP	regulation of actin polymerization or depolymerization	GO:0008064	34/3338	60/12653	6.49176e-07	6.32785e-06	3.39401e-06	Arpc3A/Kank/nwk/tmod/shi/svr/spoon/dco/Cip4/p38b/Abl/Atx2/gek/Lam/LRR/Arpc5/CG31715/Arpc2/Ssrp/PsGEF/Cortactin/Vrp1/RhoGAP92B/DAAM/Src64B/HSPC300/Arpc4/cpb/twf/Svil/Gel/Cdc42/cpa/Nup98-96
GO:BP	branching morphogenesis of an epithelial tube	GO:0048754	34/3338	60/12653	6.49176e-07	6.32785e-06	3.39401e-06	Ras85D/Vha26/baz/TSG101/hdc/bnl/Ptp10D/CCT3/Raf/Nsf2/arm/Rheb/dmt/Ptp4E/gammaCOP/VhaAC39-1/Lam/noc/rl/Dsor1/Vha100-1/Sec5/Moe/Hph/bs/VhaPPA1-1/aPKC/caps/Tor/Cds/sty/form3/stac/Cdc42
GO:BP	branching involved in open tracheal system development	GO:0060446	34/3338	60/12653	6.49176e-07	6.32785e-06	3.39401e-06	Ras85D/Vha26/baz/TSG101/hdc/bnl/Ptp10D/CCT3/Raf/Nsf2/arm/Rheb/dmt/Ptp4E/gammaCOP/VhaAC39-1/Lam/noc/rl/Dsor1/Vha100-1/Sec5/Moe/Hph/bs/VhaPPA1-1/aPKC/caps/Tor/Cds/sty/form3/stac/Cdc42
GO:BP	nucleobase-containing compound transport	GO:0015931	56/3338	118/12653	6.62019e-07	6.43167e-06	3.4497e-06	HUWE1/Dlic/Ent3/SCaMC/VhaSFD/RASSF8/Bet3/AGO2/DCTN2-p50/CG8671/BicD/mRpL18/Sap-r/CG18259/meigo/CG5382/senju/Rim2/swm/Dhc64C/CG14971/CG9915/Fmr1/SF2/Ranbp21/Srp72/CG6961/Rae1/Nxt1/Nup93-2/Moe/tho2/ZC3H3/CG4572/tex/Cbp80/Rab7/DCTN1-p150/Nup154/nac/Ref1/sesB/Arl1/thoc6/sll/Sem1/Pi3K59F/Nup358/Trs20/mbo/e(y)2/Cog2/Nup75/Nup98-96/thoc7/ncd
GO:BP	establishment of RNA localization	GO:0051236	49/3338	99/12653	6.87437e-07	6.65656e-06	3.57032e-06	HUWE1/Dlic/VhaSFD/RASSF8/Bet3/AGO2/DCTN2-p50/CG8671/BicD/mRpL18/Sap-r/CG18259/CG5382/swm/Dhc64C/CG9915/Fmr1/SF2/Ranbp21/Srp72/CG6961/Rae1/Nxt1/Nup93-2/Moe/tho2/ZC3H3/CG4572/tex/Cbp80/Rab7/DCTN1-p150/Nup154/tsu/smg/Ref1/Arl1/thoc6/Sem1/Pi3K59F/Nup358/Trs20/mbo/e(y)2/Cog2/Nup75/Nup98-96/thoc7/ncd
GO:BP	establishment of protein localization to endoplasmic reticulum	GO:0072599	21/3338	30/12653	7.2137e-07	6.96217e-06	3.73424e-06	Trp1/CG2918/Sgt/CG1598/Sec61beta/Spase22-23/Srp19/Sec61alpha/SrpRalpha/Spase25/CG8860/Srp14/Srp9/Srp68/Srp72/Srp54k/Rab3GAP1/Sec63/CG30094/CG5885/SrpRbeta
GO:BP	ovarian follicle cell development	GO:0030707	106/3338	265/12653	7.34805e-07	7.06858e-06	3.79131e-06	Ras85D/CASK/loco/baz/capu/orb/Vav/zip/shi/Uba1/rin/Rab11/spoon/Dp/ena/aop/dop/cindr/Lkb1/Not1/Raf/Cip4/nudE/sgg/SERCA/Rop/lig/mam/Stat92E/Parp/Axn/drk/Tao/par-1/slmb/fs(2)ltoPP43/Prosalpha7/Smr/Dhc64C/Socs36E/nej/Akt/Rho1/hep/Ssrp/Rab4/Dsor1/chico/Mad/Apc/Vang/veli/kel/Cortactin/Ptpmeg2/dome/da/Src64B/Cbl/Pi3K92E/Rpt4/csw/Hsc70-4/cos/Sec5/mats/M1BP/Rab5/sqh/dsh/puc/kis/brn/AP-2alpha/tkv/Rab7/MED1…
GO:BP	positive regulation of RNA metabolic process	GO:0051254	175/3338	483/12653	7.64727e-07	7.33238e-06	3.93281e-06	mnb/tou/E2f1/exd/hth/ADD1/Dora/Lpin/Ctr9/Pop2/SREBP/lgs/scf/Wbp2/Nf-YB/Xbp1/sno/CG18766/Pabp2/sima/Kdm5/Hrb87F/trh/Rga/Cdk12/Ssdp/Not1/Hcf/Sxl/Su(var)205/not/RYBP/arm/bon/Crtc/dmpd/CG9776/atms/mam/Camta/MBD-R2/Iswi/key/CG12054/crc/Axud1/Ssb-c31a/DCP2/Cf2/fry/Sgf11/Met/REPTOR-BP/CG10555/twin/PAN2/Eaf/Rtf1/Ythdf/nej/Rcd1/CG1603/hep/osa/Ge-1/MED19/Mad/barc/gce/CycK/MTF-1/Asx/Hr3/Gcn5/Sec13/sage/mask…
GO:BP	phospholipid biosynthetic process	GO:0008654	50/3338	102/12653	7.70225e-07	7.36104e-06	3.94818e-06	Acsl/elm/Pcyt2/CG2201/frj/Hmgs/Taz/Ipp/Pect/nes/fwd/Ttc7/bbc/PIG-T/Pcyt1/CLS/Dd/CG9391/GAA1/CG7990/Socs36E/PIG-G/PIG-L/Dpm3/Hyccin/PIG-F/Socs16D/Mppe/PGAP5/Pi3K92E/PGS1/Agpat1/PIG-K/Idi/PIG-S/PIG-Q/Pmvk/puml/PIP5K59B/Cds/Inos/CG7149/rdgA/Pi3K21B/CG33116/Cpes/CG7789/Pi3K59F/Fpps/CG15743
GO:BP	regulation of cell growth	GO:0001558	44/3338	86/12653	7.84907e-07	7.45281e-06	3.9974e-06	CadN/Atg1/atl/Larp4B/cic/sima/AMPKalpha/dco/Lkb1/Liprin-alpha/Rheb/puf/mRpL12/S6k/stan/pix/Sema2a/raptor/SCCRO3/CG9328/Ythdf/Akt/Mnt/Fmr1/Vang/Sema1a/Wnt5/Pi3K92E/hfp/Hph/RagA-B/srl/dsh/vito/Pdk1/Sema1b/Tor/Rac1/Pten/Tcs5/InR/spas/Thor/bif
GO:BP	negative regulation of MAPK cascade	GO:0043409	31/3338	53/12653	7.82651e-07	7.45281e-06	3.9974e-06	HUWE1/flw/Sac1/Mnn1/Usp5/raw/sgg/CG6180/ATPsynD/Ubc6/poe/Ptp61F/ebi/alph/fmt/Cbl/Urm1/SkpA/puc/Ufd4/cpb/krz/Kcmf1/sty/Spred/Mnat9/RhoGAP5A/PTP-ER/Strip/cpa/JMJD6
GO:BP	positive regulation of gene expression	GO:0010628	87/3338	208/12653	7.99067e-07	7.56278e-06	4.05638e-06	E2f1/Larp4B/DMAP1/bnl/mxt/CG4612/rin/spoon/Dp/Hrb87F/aop/tub/Mkrn1/Herc4/Dp1/Sxl/CG9005/Rheb/orb2/Ntf-2/tara/Parp/Atx2/Doa/La/key/senju/swm/CG9890/CG13404/Pli/hep/barc/HPS4/Fmr1/larp/pho/CG7483/rswl/omd/CG3862/Rae1/Pi3K92E/pum/Dph5/oc/p/Diap2/HPS1/vvl/lwr/ps/puc/CG9650/CG11342/mago/Mekk1/aub/Utx/bsk/mop/vtd/Hrb98DE/smog/CG3198/Aos1/brm/Spx/Suv3/Bap60/ash2/IntS2/imd/ash1/MED25/Dif/ca/Nup358/tyf/CG…
GO:BP	morphogenesis of a branching structure	GO:0001763	35/3338	63/12653	8.48425e-07	8.00411e-06	4.29309e-06	Ras85D/Vha26/baz/TSG101/hdc/bnl/Ptp10D/CCT3/Raf/Nsf2/arm/Rheb/dmt/Ptp4E/gammaCOP/VhaAC39-1/Lam/noc/rl/Dsor1/Vha100-1/Sec5/Moe/Hph/bs/VhaPPA1-1/CG16952/aPKC/caps/Tor/Cds/sty/form3/stac/Cdc42
GO:BP	positive regulation of growth	GO:0045927	60/3338	130/12653	8.79612e-07	8.27173e-06	4.43664e-06	mnb/Actbeta/pico/Octbeta2R/atl/pnut/Wbp2/dco/mbt/Hcf/Rheb/puf/p38b/mRpL12/Sdc/S6k/stan/bchs/Arp2/caz/Nf1/stau/raptor/RhoGAP68F/Smn/Akt/Arp3/wit/ebi/chico/Mad/simj/Vang/RhoGAP92B/Synd/Wnt5/Pi3K92E/PICK1/Hph/sNPF-R/nmo/ssp/RagA-B/step/srl/dsh/Arfip/vito/Pdk1/kis/tkv/wap/cpb/Tor/Rac1/Tcs5/InR/spas/jub/Sec8
GO:BP	retrograde vesicle-mediated transport, Golgi to endoplasmic reticulum	GO:0006890	17/3338	22/12653	8.93928e-07	8.37951e-06	4.49444e-06	CG7011/Use1/CG31729/zetaCOP/CG5946/deltaCOP/Syx18/CG9536/sau/Sec22/Ykt6/epsilonCOP/CG11857/Rab6/Cog7/alphaCOP/Cog4
GO:BP	positive regulation of proteasomal ubiquitin-dependent protein catabolic process	GO:0032436	30/3338	51/12653	9.95679e-07	9.30358e-06	4.99008e-06	Cul1/TER94/UbcE2H/ari-1/dco/fzr/Usp5/EloB/sgg/Axn/slmb/Ufd1/Ubc6/poe/ebi/Rnf146/CG31855/SkpA/STUB1/Cul2/Ufd4/muskelin/Roc1a/CkIalpha/POSH/RanBPM/Kcmf1/wds/Sou/Tnks
GO:BP	regulation of protein-containing complex disassembly	GO:0043244	24/3338	37/12653	1.00811e-06	9.38982e-06	5.03634e-06	atl/tmod/futsch/Patronin/beta-Spec/LRR/CG31715/CG8155/alpha-Spec/Apc/ema/Sbf/Rab39/cpb/tacc/Rab21/twf/Mitf/Svil/Mnat9/Vhl/spas/Gel/cpa
GO:BP	microtubule-based transport	GO:0099111	43/3338	84/12653	1.02486e-06	9.51562e-06	5.10381e-06	Atg1/Dlic/Marf/Sac1/futsch/Arl8/Khc/Dlc90F/Khc-73/milt/dop/DCTN2-p50/Liprin-alpha/Vap33/nudE/Pink1/Kap3/Kif3C/gammaCOP/stau/Klp64D/Dhc64C/ATP6AP2/Arp10/Fmr1/Apc/CG13074/cos/Klp68D/Sec5/syd/Arp1/sw/Aplip1/Rab1/BORCS5/DCTN5-p25/DCTN1-p150/jar/Klp98A/rempA/Miro/jvl
GO:BP	cytosolic transport	GO:0016482	36/3338	66/12653	1.07875e-06	9.95302e-06	5.33842e-06	loco/Msp300/comt/CG2747/Khc/Vps29/Vps53/ena/Snx3/Abl/Vps26/CG15099/Vps35/Syx6/CG4074/Arl5/Snx6/SIDL/CG32576/Moe/Vps52/cert/sqh/Rab6/Vps50/mop/cpb/DCTN1-p150/Hrs/jar/Nup154/CG1116/Klp98A/Rme-8/Snx1/Pi3K59F
GO:BP	protein localization to plasma membrane	GO:0072659	36/3338	66/12653	1.07875e-06	9.95302e-06	5.33842e-06	comt/Sec24CD/shi/Rab11/dop/Herc4/Nsf2/arm/Ttc7/Past1/sau/Vps26/Vps35/Rab3/Exo84/Sec23/CG6454/Sar1/Rab35/Hyccin/Flo2/Arfrp1/Sec71/wls/Sec5/Crag/Ank/aPKC/Rab8/stmA/KrT95D/Sec6/CG5447/Bsg/Sec15/Cdc42
GO:BP	regulation of actin filament length	GO:0030832	34/3338	61/12653	1.09635e-06	1.00836e-05	5.40847e-06	Arpc3A/Kank/nwk/tmod/shi/svr/spoon/dco/Cip4/p38b/Abl/Atx2/gek/Lam/LRR/Arpc5/CG31715/Arpc2/Ssrp/PsGEF/Cortactin/Vrp1/RhoGAP92B/DAAM/Src64B/HSPC300/Arpc4/cpb/twf/Svil/Gel/Cdc42/cpa/Nup98-96
GO:BP	positive regulation of developmental growth	GO:0048639	51/3338	106/12653	1.2298e-06	1.12406e-05	6.02903e-06	mnb/Actbeta/pico/Octbeta2R/atl/pnut/Wbp2/mbt/Rheb/p38b/Sdc/stan/bchs/Arp2/caz/Nf1/stau/RhoGAP68F/Smn/Akt/Arp3/wit/ebi/chico/Mad/simj/Vang/RhoGAP92B/Synd/Wnt5/Pi3K92E/PICK1/sNPF-R/nmo/ssp/step/dsh/Arfip/vito/Pdk1/kis/tkv/wap/cpb/Tor/Rac1/Tcs5/InR/spas/jub/Sec8
GO:BP	regulation of transferase activity	GO:0051338	51/3338	106/12653	1.2298e-06	1.12406e-05	6.02903e-06	l(3)80Fj/Dap160/blw/Ccm3/CG6966/SNF4Agamma/SCCRO/fzr/Nedd8/SCCRO4/CG14408/Wee1/Hexim/sgg/Axn/Eph/Atg17/fry/raptor/SCCRO3/Cad96Ca/CG30291/Rho1/Ret/CG40191/Fem-1/CycY/Atg14/pcs/Cbl/Pi3K92E/Invadolysin/ASPP/CG10376/step/Mat1/Alk/Cdk7/Abi/Rac1/Atg13/Pten/sty/Pi3K21B/InR/dnt/Cdc42/Drl-2/PRAS40/Rca1/mtSSB
GO:BP	nucleoside triphosphate metabolic process	GO:0009141	39/3338	74/12653	1.24919e-06	1.13824e-05	6.10506e-06	Gapdh1/Pfk/Hex-A/Ald1/PyK/Eno/blw/ATPsyngamma/Pgi/ATPsynbeta/Tpi/CG8891/Scox/Gapdh2/ATPsynF/Ak1/ATPsynD/CLS/Pgk/ATPsynCF6/sun/Pglym78/Vha68-1/Dg/CG11035/ras/ATPsyndelta/Ack/ATPsynbetaL/ATPsynE/ATPsynO/ATPsynG/ATPsynC/CTPsyn/r/awd/CG3337/sesB/CG7059
GO:BP	response to organonitrogen compound	GO:0010243	84/3338	201/12653	1.28311e-06	1.16552e-05	6.25143e-06	Calr/Cnx99A/Cul1/TER94/5-HT7/Lpin/CG1317/sima/Der-2/Usp47/Ns3/GlyP/dco/Mkrn1/Sik3/Der-1/sordd1/Rheb/Crtc/alpha-Man-Ib/sgg/S6k/drk/Lamtor1/5-HT2A/Tao/Glo1/slmb/Ufd1/raptor/Sirt1/sordd2/rl/Lamtor3/wrd/Ptp61F/Ube4A/Pp2A-29B/Akt/Edem1/Dsor1/chico/CG8405/Fmr1/sip3/Gp93/Trc8/Pi3K92E/Rpt4/Cdc37/SkpA/HDAC4/RagA-B/step/STUB1/5-HT2B/srl/CG32638/Uggt/CG6766/CG15814/Pdk1/Sik2/Roc1a/Rab10/cnk/POSH/nclb/Tor/CG…
GO:BP	regulation of protein polymerization	GO:0032271	37/3338	69/12653	1.33926e-06	1.21278e-05	6.50487e-06	Arpc3A/Kank/nwk/tmod/shi/svr/spoon/dco/chb/Cip4/p38b/Efa6/Atx2/gek/Lam/LRR/Arpc5/cnn/CG31715/msps/Arpc2/Ssrp/PsGEF/Cortactin/Vrp1/RhoGAP92B/DAAM/Arpc4/cpb/mv/twf/Svil/Mnat9/Gel/Cdc42/cpa/Nup98-96
GO:BP	cellular response to peptide hormone stimulus	GO:0071375	45/3338	90/12653	1.35423e-06	1.21881e-05	6.53722e-06	Cul1/Lpin/sima/Usp47/Ns3/GlyP/Mkrn1/Sik3/Rheb/sgg/S6k/drk/Glo1/slmb/raptor/Sirt1/rl/wrd/Ptp61F/Pp2A-29B/Akt/Dsor1/chico/Fmr1/Pi3K92E/Cdc37/SkpA/HDAC4/step/STUB1/srl/CG32638/Pdk1/Sik2/Roc1a/Rab10/cnk/nclb/Tor/Pten/Pi3K21B/InR/Thor/Ide/PRAS40
GO:BP	cellular response to peptide	GO:1901653	45/3338	90/12653	1.35423e-06	1.21881e-05	6.53722e-06	Cul1/Lpin/sima/Usp47/Ns3/GlyP/Mkrn1/Sik3/Rheb/sgg/S6k/drk/Glo1/slmb/raptor/Sirt1/rl/wrd/Ptp61F/Pp2A-29B/Akt/Dsor1/chico/Fmr1/Pi3K92E/Cdc37/SkpA/HDAC4/step/STUB1/srl/CG32638/Pdk1/Sik2/Roc1a/Rab10/cnk/nclb/Tor/Pten/Pi3K21B/InR/Thor/Ide/PRAS40
GO:BP	neuron maturation	GO:0042551	33/3338	59/12653	1.41591e-06	1.26654e-05	6.79326e-06	plum/shep/Cul1/TSG101/shrb/hdc/Uba1/drpr/IKKepsilon/Stam/CalpA/slmb/Vps28/Dhc64C/Pc/Fmr1/Vps4/Sec71/Pi3K92E/spn-F/SMC1/SA/SkpA/kis/Roc1a/bsk/mop/Hrs/vtd/Uvrag/Sox14/InR/Pi3K59F
GO:BP	positive regulation of cellular protein localization	GO:1903829	33/3338	59/12653	1.41591e-06	1.26654e-05	6.79326e-06	Rab11/Herc4/Asap/Abl/Parp/tral/Tom7/Klp64D/Lam/AdipoR/Vps35/CG6454/Sar1/Rep/Rab35/Flo2/CG13920/S/RhoGAP92B/wls/Moe/Akap200/Ttd14/Crag/Rab1/mop/Hrs/Nup154/RanBPM/papi/rempA/Nup358/Aladin
GO:BP	protein localization to cell periphery	GO:1990778	40/3338	77/12653	1.48932e-06	1.32817e-05	7.12379e-06	comt/Sec24CD/shi/Rab11/dop/Herc4/Lkb1/Nsf2/arm/Ttc7/Past1/sau/Vps26/Vps35/Rab3/Exo84/Sec23/CG6454/Sar1/Rab35/Hyccin/Flo2/veli/Arfrp1/Sec71/wls/Sec5/Crag/Ank/aPKC/Rab1/Rab8/stmA/KrT95D/Sec6/alphaCOP/CG5447/Bsg/Sec15/Cdc42
GO:BP	endosome organization	GO:0007032	21/3338	31/12653	1.67925e-06	1.49301e-05	8.00791e-06	TSG101/dop/car/ref(2)P/lsn/Vps28/Hs3st-B/RabX1/Rab35/Ocrl/ClC-c/Rab5/cert/Pten/Strump/Rme-8/Vps8/SWIP/SH3PX1/Strip/Vps24
GO:BP	cellular response to insulin stimulus	GO:0032869	44/3338	88/12653	1.76914e-06	1.56818e-05	8.4111e-06	Cul1/Lpin/sima/Usp47/Ns3/GlyP/Mkrn1/Sik3/Rheb/sgg/S6k/drk/Glo1/slmb/raptor/Sirt1/rl/wrd/Ptp61F/Pp2A-29B/Akt/Dsor1/chico/Fmr1/Pi3K92E/Cdc37/SkpA/HDAC4/step/STUB1/srl/Pdk1/Sik2/Roc1a/Rab10/cnk/nclb/Tor/Pten/Pi3K21B/InR/Thor/Ide/PRAS40
GO:BP	protein targeting to ER	GO:0045047	20/3338	29/12653	1.93609e-06	1.71099e-05	9.17709e-06	Trp1/CG2918/Sgt/CG1598/Sec61beta/Spase22-23/Srp19/Sec61alpha/SrpRalpha/Spase25/CG8860/Srp14/Srp9/Srp68/Srp72/Srp54k/Sec63/CG30094/CG5885/SrpRbeta
GO:BP	transport along microtubule	GO:0010970	42/3338	83/12653	2.02273e-06	1.77685e-05	9.53034e-06	Atg1/Dlic/Marf/Sac1/futsch/Arl8/Khc/Dlc90F/Khc-73/milt/dop/DCTN2-p50/Liprin-alpha/Vap33/nudE/Pink1/Kap3/Kif3C/gammaCOP/stau/Klp64D/Dhc64C/ATP6AP2/Arp10/Fmr1/Apc/CG13074/cos/Klp68D/Sec5/syd/Arp1/sw/Aplip1/Rab1/BORCS5/DCTN5-p25/DCTN1-p150/jar/Klp98A/rempA/Miro
GO:BP	phosphatidylinositol metabolic process	GO:0046488	42/3338	83/12653	2.02273e-06	1.77685e-05	9.53034e-06	sp3/Sac1/Synj/frj/Ipp/CG14411/rdgB/INPP5E/Vap33/fwd/Ttc7/PIG-T/CG9391/GAA1/CG7990/Socs36E/PGAP1/PIG-G/5PtaseI/PIG-L/Dpm3/Ocrl/Hyccin/PIG-F/FIG4/Socs16D/Mppe/PGAP5/Pi3K92E/CG6805/CG6707/PIG-K/PIG-S/PIG-Q/PIP5K59B/Pten/Cds/rdgA/Pi3K21B/CG7789/Pi3K59F/CG15743
GO:BP	regulation of protein localization	GO:0032880	53/3338	113/12653	2.05183e-06	1.79178e-05	9.61041e-06	Evi5/dally/prd1/Rab11/Herc4/rdx/Su(var)205/Asap/Abl/sgg/SrpRalpha/Parp/tral/Tom7/Klp64D/Lam/AdipoR/Fam92/Vps35/Ran/Ptp61F/CG6454/Sar1/Rep/Rab35/Flo2/CG13920/Apc/S/RhoGAP92B/Su(dx)/Gapvd1/wls/Moe/PICK1/Akap200/Ttd14/Crag/Ptpa/Rab1/CG14020/mop/Hrs/jar/Nup154/RanBPM/Mi-2/papi/Arl1/rempA/Nup358/Aladin/mbo
GO:BP	nucleoside triphosphate biosynthetic process	GO:0009142	24/3338	38/12653	2.05193e-06	1.79178e-05	9.61041e-06	blw/ATPsyngamma/ATPsynbeta/Scox/ATPsynF/Ak1/ATPsynD/CLS/ATPsynCF6/sun/CG11035/ras/ATPsyndelta/Ack/ATPsynbetaL/ATPsynE/ATPsynO/ATPsynG/ATPsynC/CTPsyn/r/awd/CG3337/sesB
GO:BP	multivesicular body sorting pathway	GO:0071985	19/3338	27/12653	2.18914e-06	1.90591e-05	1.02226e-05	ALiX/shrb/Vta1/Mvb12/CG30423/Stam/lsn/Vps28/Mon1/CHMP2B/Ist1/Vps20/CG15012/Rab5/Rab7/mop/Hrs/Chmp1/Vps24
GO:BP	regulation of cell differentiation	GO:0045595	112/3338	289/12653	2.2462e-06	1.93266e-05	1.0366e-05	Dap160/mnb/Ras85D/Actbeta/hth/tws/CadN/Cul1/atl/hdc/bnl/Ctr9/CG11000/Nf-YB/ari-1/Kdm5/Usp47/aop/unk/mbt/lqf/Mkrn1/sif/Nedd4/C1GalTA/Raf/Nedd8/nudC/Rheb/GM130/nudE/stan/Stat92E/G9a/Sema2a/par-1/slmb/spg/Kr-h1/Hs3st-B/rl/Dhc64C/Socs36E/Ythdf/MAGE/Sec23/Sar1/osa/Mad/barc/Flo2/Fmr1/Apc/Vang/omd/CSN5/DAAM/mask/alph/Src64B/Sema1a/Sec71/Wnt5/Pi3K92E/csw/spn-F/RasGAP1/oc/cdi/mor/Cdc37/CG13001/tinc/IntS1/…
GO:BP	nucleobase-containing small molecule metabolic process	GO:0055086	112/3338	289/12653	2.2462e-06	1.93266e-05	1.0366e-05	Gapdh1/Pfk/Ac3/Hex-A/Ald1/Pde11/FucT6/Cmpk/Acsl/CG6330/PyK/Eno/AMPdeam/blw/AdSS/ATPsyngamma/Pgi/ATPsynbeta/Pdhb/Tpi/Hmgs/CG8891/Scox/Gapdh2/Mdh1/UGP/ATPsynF/Aps/Sik3/ScsbetaG/CG8360/Men/Adk3/Nmnat/CG42813/AhcyL1/Ak1/ATPsynD/CLS/Pgk/Pdha/Adk2/ATPsynCF6/sun/Papss/Nt5b/cu/CRMP/bur/fbl/Gpdh1/Gycbeta100B/CG31183/Pglym78/Vha68-1/muc/Dg/CG33056/Gmd/CG8080/ScsbetaA/mmy/ATPCL/Mpi/Nadsyn/CG11035/Sarm/CG835…
GO:BP	glycoprotein biosynthetic process	GO:0009101	60/3338	133/12653	2.24374e-06	1.93266e-05	1.0366e-05	FucT6/FucTA/Mgat2/Dad1/Alg11/Hs6st/Ost48/CG4341/Pabp2/sff/CG33303/CG33774/Pgant2/CG3662/CG3253/Mgat4a/C1GalTA/CG15651/CG31690/Pgant5/Xxylt/CG9536/GalT1/CG8668/Stt3A/wol/GCS1/sxc/crc/meigo/Csgalnact/senju/Ostgamma/CG3149/FucTC/Dpm3/sfl/O-fut1/mmy/CG32276/ttv/GlcAT-S/beta3GalTII/CG9662/Tango14/Alg3/Alg2/CG5276/Pgant35A/Uggt/CG6659/brn/Alg12/CG11357/kud/nac/Tmtc3/Alg13/sll/Eogt
GO:BP	regulation of canonical Wnt signaling pathway	GO:0060828	46/3338	94/12653	2.23692e-06	1.93266e-05	1.0366e-05	tws/HUWE1/Cul1/TER94/flw/Eip63E/dally/CG11523/Usp47/aop/dco/Ssdp/sgg/hyd/Kap3/gro/Axn/Duba/slmb/Klp64D/Nulp1/Wnk/nej/Rho1/RanBP3/CycY/Apc/Rnf146/Bili/Sin3A/SkpA/nmo/skd/ebd1/hyx/Roc1a/CkIalpha/kto/SoxN/apolpp/Pp1alpha-96A/nkd/Sulf1/rempA/CtBP/Tnks
GO:BP	purine ribonucleoside triphosphate metabolic process	GO:0009205	35/3338	65/12653	2.2665e-06	1.93945e-05	1.04024e-05	Gapdh1/Pfk/Hex-A/Ald1/PyK/Eno/blw/ATPsyngamma/Pgi/ATPsynbeta/Tpi/Scox/Gapdh2/ATPsynF/Ak1/ATPsynD/CLS/Pgk/ATPsynCF6/sun/Pglym78/Vha68-1/Dg/CG11035/ras/ATPsyndelta/ATPsynbetaL/ATPsynE/ATPsynO/ATPsynG/ATPsynC/awd/CG3337/sesB/CG7059
GO:BP	regulation of lamellipodium assembly	GO:0010591	14/3338	17/12653	2.26731e-06	1.93945e-05	1.04024e-05	SCAR/ena/Abl/Tm1/hep/Arp3/HSPC300/aPKC/cpb/Rac1/psidin/twf/Cdc42/cpa
GO:BP	positive regulation of phosphorus metabolic process	GO:0010562	43/3338	86/12653	2.3115e-06	1.96578e-05	1.05437e-05	l(3)80Fj/Dap160/Actbeta/elm/bnl/Ccm3/CG9098/Scox/Sik3/Lk6/p38b/Mob2/Axn/Eph/Dd/Atg17/fry/raptor/Cad96Ca/Rho1/Ret/Atg14/Pi3K92E/ASPP/mats/step/Mat1/Ankle2/Alk/Mekk1/PPP1R15/Tor/Abi/Rac1/PIP5K59B/Atg13/Cds/CG7044/sesB/InR/dnt/Cdc42/Drl-2
GO:BP	positive regulation of phosphate metabolic process	GO:0045937	43/3338	86/12653	2.3115e-06	1.96578e-05	1.05437e-05	l(3)80Fj/Dap160/Actbeta/elm/bnl/Ccm3/CG9098/Scox/Sik3/Lk6/p38b/Mob2/Axn/Eph/Dd/Atg17/fry/raptor/Cad96Ca/Rho1/Ret/Atg14/Pi3K92E/ASPP/mats/step/Mat1/Ankle2/Alk/Mekk1/PPP1R15/Tor/Abi/Rac1/PIP5K59B/Atg13/Cds/CG7044/sesB/InR/dnt/Cdc42/Drl-2
GO:BP	nucleic acid transport	GO:0050657	47/3338	97/12653	2.48003e-06	2.09695e-05	1.12472e-05	HUWE1/Dlic/VhaSFD/RASSF8/Bet3/AGO2/DCTN2-p50/CG8671/BicD/mRpL18/Sap-r/CG18259/CG5382/swm/Dhc64C/CG9915/Fmr1/SF2/Ranbp21/Srp72/CG6961/Rae1/Nxt1/Nup93-2/Moe/tho2/ZC3H3/CG4572/tex/Cbp80/Rab7/DCTN1-p150/Nup154/Ref1/Arl1/thoc6/Sem1/Pi3K59F/Nup358/Trs20/mbo/e(y)2/Cog2/Nup75/Nup98-96/thoc7/ncd
GO:BP	RNA transport	GO:0050658	47/3338	97/12653	2.48003e-06	2.09695e-05	1.12472e-05	HUWE1/Dlic/VhaSFD/RASSF8/Bet3/AGO2/DCTN2-p50/CG8671/BicD/mRpL18/Sap-r/CG18259/CG5382/swm/Dhc64C/CG9915/Fmr1/SF2/Ranbp21/Srp72/CG6961/Rae1/Nxt1/Nup93-2/Moe/tho2/ZC3H3/CG4572/tex/Cbp80/Rab7/DCTN1-p150/Nup154/Ref1/Arl1/thoc6/Sem1/Pi3K59F/Nup358/Trs20/mbo/e(y)2/Cog2/Nup75/Nup98-96/thoc7/ncd
GO:BP	photoreceptor cell development	GO:0042461	56/3338	122/12653	2.49139e-06	2.1005e-05	1.12663e-05	mbl/Ras85D/baz/CadN/SP2353/sno/ben/Rab11/mbt/capt/CadN2/Raf/Liprin-alpha/jeb/Mob2/stan/Atx2/Doa/vimar/fry/Kr-h1/GAA1/cnn/msk/Amph/Syn2/Ire1/ebi/Dsor1/Vps4/yrt/tutl/Synd/Su(dx)/csw/dysc/oc/Moe/AP-1sigma/Afti/tinc/Rab6/PIG-S/Alk/DCTN1-p150/Patj/Rac1/Pten/Dab/Sec6/sty/Bsg/p47/Mbs/EMC3/CSN8
GO:BP	mitochondrial ATP synthesis coupled electron transport	GO:0042775	38/3338	73/12653	2.53737e-06	2.13314e-05	1.14413e-05	SdhA/Cyt-c1/ND-B14.5B/Chchd2/CG14757/ND-B14.5A/cype/UQCR-6.4/SdhB/SdhC/ND-B22/SdhD/ND-51/CG42376/Cyt-c-p/COX4/UQCR-Q/ND-42/Pink1/RFeSP/levy/ND-49/COX5A/dj-1beta/ND-B17.2/ND-B17/ND-19/ND-ASHI/COX5B/COX7A/UQCR-C2/CG7630/CG12895/ND-13A/ND-24/UQCR-11/COX8/ND-23
GO:BP	mitochondrion localization	GO:0051646	17/3338	23/12653	2.58046e-06	2.16316e-05	1.16024e-05	Msp300/Marf/Khc/milt/Pink1/clu/Rim2/Dhc64C/Arp10/larp/Arp1/Aplip1/DCTN1-p150/jar/Drp1/Bsg/Miro
GO:BP	regulation of small GTPase mediated signal transduction	GO:0051056	44/3338	89/12653	2.61175e-06	2.18316e-05	1.17096e-05	RhoGEF3/RapGAP1/siz/CG18659/CG9098/14-3-3zeta/Uba1/ArfGAP1/Sur-8/CG34393/garz/Rlip/Efa6/Nf1/vap/CG34408/CG5521/RhoGAP1A/CG7369/Ziz/PsGEF/Fnta/RhoGAP92B/Gapvd1/alph/Sec71/Rab3GAP1/pns/Crag/step/Sbf/Hmgcr/cnk/CG4853/raskol/CG42674/sty/Rab3-GEF/RhoGAP5A/ca/Strip/betaggt-I/cv-c/Rgl
GO:BP	canonical Wnt signaling pathway	GO:0060070	52/3338	111/12653	2.66894e-06	2.22462e-05	1.1932e-05	tws/HUWE1/Cul1/TER94/flw/Eip63E/dally/fz2/lgs/CG11523/Usp47/aop/dco/Ssdp/arm/sgg/hyd/Kap3/gro/Axn/Duba/slmb/Klp64D/Nulp1/Wnk/nej/Rho1/RanBP3/CycY/Apc/Rnf146/Wnt5/Bili/Sin3A/SkpA/nmo/skd/ebd1/hyx/dsh/Roc1a/CkIalpha/kto/SoxN/apolpp/Pp1alpha-96A/pygo/nkd/Sulf1/rempA/CtBP/Tnks
GO:BP	germarium-derived egg chamber formation	GO:0007293	48/3338	100/12653	2.72681e-06	2.26642e-05	1.21562e-05	slmo/baz/CSN7/flw/14-3-3zeta/Rab11/enc/drosha/chb/Sxl/Cip4/nudE/Stat92E/alien/BicD/hts/rngo/par-1/slmb/Dhc64C/alpha-Spec/Dg/MESR4/Fmr1/Apc/kel/Cortactin/CSN5/pcs/Src64B/spn-A/Rab6/aPKC/brn/NHP2/nsl1/nclb/Tor/tsu/Mettl3/CSN3/CSN1b/Sce/mus301/Pdcd4/Scm/cpa/jvl
GO:BP	actin filament polymerization	GO:0030041	34/3338	63/12653	2.94805e-06	2.4365e-05	1.30684e-05	Arpc3A/Kank/nwk/ALiX/tmod/shi/svr/spoon/dco/SelR/Cip4/p38b/Atx2/gek/Lam/LRR/Arpc5/CG31715/Arpc2/Ssrp/PsGEF/Cortactin/Vrp1/RhoGAP92B/DAAM/Arpc4/cpb/twf/Strump/Svil/Gel/Cdc42/cpa/Nup98-96
GO:BP	regulation of intracellular transport	GO:0032386	34/3338	63/12653	2.94805e-06	2.4365e-05	1.30684e-05	sp3/DCTN2-p50/rdx/Abl/sgg/tral/Tom7/Klp64D/RhoGAP68F/swm/PGAP1/CG6454/Sar1/Apc/wls/Su(fu)/Moe/Ttd14/Rcc1/ZC3H3/BORCS5/Rab7/ReepB/ScpX/Nup154/RanBPM/Rme-8/Arl1/rempA/Pi3K59F/Nup358/mbo/Nup98-96/Fs(2)Ket
GO:BP	cellular carbohydrate metabolic process	GO:0044262	49/3338	103/12653	2.97545e-06	2.45224e-05	1.31529e-05	Hex-A/Actbeta/CG7766/Atg1/FASN1/Synj/l(1)G0196/Tpi/Ipp/GlyP/UGP/Sik3/Atg3/GlyS/sgg/PhKgamma/Gbs-76A/Axn/AGBE/CG9391/crc/Atg17/Treh/5PtaseI/sfl/betaGlu/Ocrl/ttv/CG6805/CG11594/Gk2/CG8475/Pgm1/Atg9/Pten/Inos/Hr96/Pask/ACC/CG15117/Pdk/CG1271/CG7789/CG3534/CG9485/Atg18a/Ide/CG15743/Sodh-2
GO:BP	photoreceptor cell differentiation	GO:0046530	95/3338	238/12653	3.02754e-06	2.48818e-05	1.33456e-05	mbl/Ras85D/Actbeta/hth/baz/CadN/SP2353/Khc/14-3-3zeta/Nf-YB/rin/sno/ben/Rab11/hbs/Usp47/aop/mbt/capt/CadN2/Raf/Usp5/Liprin-alpha/arm/jeb/Mob2/stan/Atx2/Doa/drk/Past1/Tao/vimar/Fur2/fry/spg/noc/Kr-h1/GAA1/cnn/msk/rl/Amph/Socs36E/Syn2/nej/Ire1/ebi/osa/Dsor1/Mad/Vps4/yrt/tutl/S/CSN5/Synd/Su(dx)/mask/alph/Src64B/Cbl/csw/dysc/RasGAP1/oc/Moe/cdi/AP-1sigma/sw/Afti/tinc/dsh/Rab6/PIG-S/tkv/Alk/mop/cnk/DCT…
GO:BP	activation of GTPase activity	GO:0090630	22/3338	34/12653	3.04964e-06	2.49934e-05	1.34055e-05	CG1695/RapGAP1/tbc/Evi5/Vav/sif/CG5916/spg/CG34408/CG42795/RN-tre/TBC1D16/CG8155/CG3703/Tbc1d8-9/CenG1A/TBC1D5/wkd/Crag/CG4041/GAPsec/Rgl
GO:BP	organelle disassembly	GO:1903008	25/3338	41/12653	3.20009e-06	2.61534e-05	1.40277e-05	Atg1/TER94/Khc/SREBP/Sod2/Atg3/Pink1/pix/ref(2)P/CG5676/Atg17/Ubc6/Atg18b/Hsc70-5/Atg14/CG11975/mask/Atg9/mRRF2/Atg13/Aduk/Atg8a/Vps13D/pelo/Atg18a
GO:BP	regulation of locomotion	GO:0040012	56/3338	123/12653	3.41003e-06	2.77917e-05	1.49064e-05	sli/CASK/Evi5/ths/bnl/zip/sima/AMPKalpha/ena/aop/Rheb/homer/S6k/stan/fra/Stam/Sema2a/par-1/slmb/LRR/raptor/Akt/Rho1/hep/Nrx-1/chico/mmy/Tbh/Vang/Sema1a/Wnt5/Cbl/Pi3K92E/Sin3A/sqh/dsh/puc/kis/Rab1/Sema1b/bsk/Hrs/Trim9/PlexB/Tor/Rac1/Pten/Catsup/Rme-8/robo2/Arl1/mys/Rap2l/InR/Pu/kay
GO:BP	purine nucleoside triphosphate metabolic process	GO:0009144	35/3338	66/12653	3.6075e-06	2.93197e-05	1.57259e-05	Gapdh1/Pfk/Hex-A/Ald1/PyK/Eno/blw/ATPsyngamma/Pgi/ATPsynbeta/Tpi/Scox/Gapdh2/ATPsynF/Ak1/ATPsynD/CLS/Pgk/ATPsynCF6/sun/Pglym78/Vha68-1/Dg/CG11035/ras/ATPsyndelta/ATPsynbetaL/ATPsynE/ATPsynO/ATPsynG/ATPsynC/awd/CG3337/sesB/CG7059
GO:BP	epithelial cell development	GO:0002064	114/3338	298/12653	3.78453e-06	3.06735e-05	1.64521e-05	Ras85D/CASK/loco/baz/capu/orb/Vav/zip/shi/Uba1/rin/Rab11/spoon/Dp/CG41099/ena/aop/dop/cindr/Lkb1/Not1/garz/Raf/Cip4/Abl/nudE/sgg/SERCA/Rop/lig/mam/Stat92E/Parp/Axn/drk/Tao/par-1/slmb/fs(2)ltoPP43/Prosalpha7/Smr/Dhc64C/Socs36E/nej/Akt/Rho1/hep/Ssrp/Rab4/Dsor1/chico/Mad/Rab35/Apc/Vang/veli/kel/Cortactin/Ptpmeg2/dome/da/Src64B/Cbl/Pi3K92E/Rpt4/csw/Hsc70-4/cos/Sec5/mats/M1BP/Rab5/sqh/dsh/puc/aPKC/kis…
GO:BP	ATP metabolic process	GO:0046034	33/3338	61/12653	3.8341e-06	3.09897e-05	1.66217e-05	Gapdh1/Pfk/Hex-A/Ald1/PyK/Eno/blw/ATPsyngamma/Pgi/ATPsynbeta/Tpi/Scox/Gapdh2/ATPsynF/Ak1/ATPsynD/CLS/Pgk/ATPsynCF6/sun/Pglym78/Vha68-1/Dg/CG11035/ATPsyndelta/ATPsynbetaL/ATPsynE/ATPsynO/ATPsynG/ATPsynC/CG3337/sesB/CG7059
GO:BP	protein polymerization	GO:0051258	48/3338	101/12653	3.87726e-06	3.11668e-05	1.67167e-05	Arpc3A/Kank/nwk/ALiX/gammaTub23C/tmod/shi/Khc/svr/Tbce/spoon/dco/chb/SelR/ens/Cip4/p38b/nudE/Efa6/Atx2/gek/Lam/LRR/Arpc5/cnn/CG31715/msps/Arpc2/Ssrp/PsGEF/Cortactin/Vrp1/RhoGAP92B/DAAM/Plp/Grip84/Grip163/Arpc4/cpb/mv/twf/Strump/Svil/Mnat9/Gel/Cdc42/cpa/Nup98-96
GO:BP	phosphatidylinositol dephosphorylation	GO:0046856	11/3338	12/12653	3.87465e-06	3.11668e-05	1.67167e-05	sp3/Sac1/Synj/CG14411/INPP5E/5PtaseI/Ocrl/FIG4/CG6805/CG6707/Pten
GO:BP	protein glycosylation	GO:0006486	53/3338	115/12653	3.95561e-06	3.15374e-05	1.69154e-05	FucT6/FucTA/Mgat2/Dad1/Alg11/Ost48/CG4341/Pabp2/sff/CG33303/CG33774/Pgant2/CG3253/Mgat4a/C1GalTA/CG15651/CG31690/Pgant5/Xxylt/CG9536/GalT1/CG8668/Stt3A/wol/GCS1/sxc/crc/meigo/senju/Ostgamma/CG3149/FucTC/Dpm3/O-fut1/mmy/CG32276/ttv/beta3GalTII/CG9662/Tango14/Alg3/Alg2/Pgant35A/Uggt/CG6659/brn/Alg12/CG11357/kud/nac/Tmtc3/Alg13/Eogt
GO:BP	macromolecule glycosylation	GO:0043413	53/3338	115/12653	3.95561e-06	3.15374e-05	1.69154e-05	FucT6/FucTA/Mgat2/Dad1/Alg11/Ost48/CG4341/Pabp2/sff/CG33303/CG33774/Pgant2/CG3253/Mgat4a/C1GalTA/CG15651/CG31690/Pgant5/Xxylt/CG9536/GalT1/CG8668/Stt3A/wol/GCS1/sxc/crc/meigo/senju/Ostgamma/CG3149/FucTC/Dpm3/O-fut1/mmy/CG32276/ttv/beta3GalTII/CG9662/Tango14/Alg3/Alg2/Pgant35A/Uggt/CG6659/brn/Alg12/CG11357/kud/nac/Tmtc3/Alg13/Eogt
GO:BP	insulin receptor signaling pathway	GO:0008286	41/3338	82/12653	3.94786e-06	3.15374e-05	1.69154e-05	Cul1/Lpin/sima/Usp47/Ns3/GlyP/Mkrn1/Sik3/Rheb/sgg/S6k/drk/Glo1/slmb/raptor/rl/wrd/Ptp61F/Pp2A-29B/Akt/Dsor1/chico/Fmr1/Pi3K92E/Cdc37/SkpA/HDAC4/step/STUB1/srl/Pdk1/Sik2/Roc1a/cnk/Tor/Pten/Pi3K21B/InR/Thor/Ide/PRAS40
GO:BP	protein autophosphorylation	GO:0046777	24/3338	39/12653	4.00161e-06	3.18177e-05	1.70658e-05	mnb/Atg1/dco/IKKepsilon/CG17528/Pak3/Raf/Lk6/bon/slpr/Abl/Pink1/Fak/Doa/Eph/MAPk-Ak2/Wnk/Pkn/nmo/Tlk/hop/Aduk/awd/InR
GO:BP	tube morphogenesis	GO:0035239	74/3338	176/12653	4.13193e-06	3.2765e-05	1.75739e-05	Rbcn-3A/Ras85D/Vha26/baz/TSG101/Dlic/Sac1/hdc/bnl/zip/Sec24CD/Ptp10D/ct/trh/CCT3/garz/Raf/raw/Nsf2/arm/Rheb/dmt/Dad/Ptp4E/Stat92E/gammaCOP/VhaAC39-1/drk/Lam/noc/Smn/rl/Dhc64C/kkv/Rho1/Sec23/Dsor1/Rab35/mmy/Fmr1/Gp93/S/Vha100-1/dome/Sec5/Moe/Hph/bs/wkd/VhaPPA1-1/sqh/Act5C/puc/aPKC/mew/caps/wal/bsk/cnk/DCTN1-p150/hop/Tor/Rac1/ecd/vkg/Cds/sty/form3/fand/stac/Vhl/Cdc42/barr/cv-c
GO:BP	regulation of neuron differentiation	GO:0045664	42/3338	85/12653	4.45875e-06	3.51666e-05	1.8862e-05	mnb/Ras85D/hth/Cul1/hdc/Nf-YB/Usp47/aop/mbt/Raf/slmb/spg/Kr-h1/rl/Dhc64C/Socs36E/omd/mask/alph/Src64B/Sec71/Pi3K92E/csw/spn-F/RasGAP1/oc/cdi/CG13001/tinc/IntS1/Alk/Roc1a/bsk/mop/sv/Sox14/Dab/sty/IntS2/btd/InR/Mbs
GO:BP	glycerophospholipid biosynthetic process	GO:0046474	42/3338	85/12653	4.45875e-06	3.51666e-05	1.8862e-05	Acsl/Pcyt2/CG2201/frj/Taz/Ipp/Pect/nes/fwd/Ttc7/bbc/PIG-T/Pcyt1/CLS/CG9391/GAA1/CG7990/Socs36E/PIG-G/PIG-L/Dpm3/Hyccin/PIG-F/Socs16D/Mppe/PGAP5/Pi3K92E/PGS1/Agpat1/PIG-K/PIG-S/PIG-Q/puml/PIP5K59B/Cds/CG7149/rdgA/Pi3K21B/CG33116/CG7789/Pi3K59F/CG15743
GO:BP	ATP synthesis coupled electron transport	GO:0042773	39/3338	77/12653	4.51525e-06	3.55167e-05	1.90498e-05	SdhA/Cyt-c1/ND-B14.5B/Chchd2/ND-75/CG14757/ND-B14.5A/cype/UQCR-6.4/SdhB/SdhC/ND-B22/SdhD/ND-51/CG42376/Cyt-c-p/COX4/UQCR-Q/ND-42/Pink1/RFeSP/levy/ND-49/COX5A/dj-1beta/ND-B17.2/ND-B17/ND-19/ND-ASHI/COX5B/COX7A/UQCR-C2/CG7630/CG12895/ND-13A/ND-24/UQCR-11/COX8/ND-23
GO:BP	cytoskeleton-dependent intracellular transport	GO:0030705	46/3338	96/12653	4.63799e-06	3.63847e-05	1.95153e-05	Atg1/Dlic/Marf/Sac1/futsch/Arl8/Khc/Dlc90F/Khc-73/milt/dop/DCTN2-p50/hook/Liprin-alpha/Vap33/nudE/Pink1/Kap3/Kif3C/gammaCOP/stau/Klp64D/Dhc64C/Myo95E/ATP6AP2/Arp10/Fmr1/Apc/CG13074/cos/Klp68D/Sec5/syd/Arp1/sw/Aplip1/sqh/Rab1/BORCS5/DCTN5-p25/DCTN1-p150/jar/Klp98A/rempA/Miro/Golgin104
GO:BP	aerobic electron transport chain	GO:0019646	34/3338	64/12653	4.70315e-06	3.67975e-05	1.97367e-05	SdhA/Cyt-c1/ND-B14.5B/CG14757/ND-B14.5A/cype/UQCR-6.4/SdhB/SdhC/ND-B22/SdhD/ND-51/Cyt-c-p/COX4/UQCR-Q/ND-42/Pink1/RFeSP/levy/ND-49/COX5A/ND-B17/ND-19/ND-ASHI/COX5B/COX7A/UQCR-C2/CG7630/CG12895/ND-13A/ND-24/UQCR-11/COX8/ND-23
GO:BP	maintenance of location	GO:0051235	51/3338	110/12653	4.82804e-06	3.76741e-05	2.02069e-05	Ubc2/Acsl/elm/dally/blw/zip/KdelR/FASN1/SREBP/SNF4Agamma/14-3-3zeta/Uba1/SPoCk/AMPKalpha/zetaCOP/CG5946/deltaCOP/SERCA/Parp/gammaCOP/Grasp65/Fer1HCH/Dhc64C/Akt/adp/CG11857/betaCOP/Su(dx)/Pi3K92E/Invadolysin/Su(fu)/cos/Act5C/Itpr/mago/aub/puml/apolpp/Atf3/Pten/Cds/twf/Vps13/alphaCOP/Pi3K21B/CG5742/Vps13D/InR/Cdc42/ca/mbo
GO:BP	vascular endothelial growth factor receptor signaling pathway	GO:0048010	23/3338	37/12653	4.98063e-06	3.87617e-05	2.07903e-05	Ras85D/Vav/Ptp10D/aop/Raf/slpr/Ptp4E/S6k/drk/rl/Ptp61F/Akt/hep/Dsor1/Socs16D/Pi3K92E/RasGAP1/bsk/Tor/Rac1/Cdc42/Thor/PRAS40
GO:BP	glycosylation	GO:0070085	53/3338	116/12653	5.43215e-06	4.21639e-05	2.26151e-05	FucT6/FucTA/Mgat2/Dad1/Alg11/Ost48/CG4341/Pabp2/sff/CG33303/CG33774/Pgant2/CG3253/Mgat4a/C1GalTA/CG15651/CG31690/Pgant5/Xxylt/CG9536/GalT1/CG8668/Stt3A/wol/GCS1/sxc/crc/meigo/senju/Ostgamma/CG3149/FucTC/Dpm3/O-fut1/mmy/CG32276/ttv/beta3GalTII/CG9662/Tango14/Alg3/Alg2/Pgant35A/Uggt/CG6659/brn/Alg12/CG11357/kud/nac/Tmtc3/Alg13/Eogt
GO:BP	cell division	GO:0051301	106/3338	275/12653	5.53248e-06	4.28293e-05	2.2972e-05	Septin2/loco/baz/tws/pico/ALiX/CSN7/flw/shrb/dally/zip/pnut/shi/alphaSnap/Rab11/Cdc27/enc/dco/IKKepsilon/Pex13/cindr/Septin4/chb/Lkb1/Sxl/Asap/fwd/Nak/Bruce/wac/Graf/hyd/mam/orb2/Sara/Stat92E/alien/gammaCOP/hts/sau/clu/Lam/brun/Smn/cnn/msps/twin/Exo84/Dhc64C/Syx5/fbl/ghi/Rho1/Pkn/chico/Mad/Rab35/Ocrl/CSN5/vib/Synd/flfl/Ehbp1/fws/ric8a/hfp/mgr/Ggamma1/sqh/Act5C/lwr/Su(var)2-10/aPKC/Cp110/Rab1/AP-2…
GO:BP	anterograde axonal transport	GO:0008089	12/3338	14/12653	5.84545e-06	4.51331e-05	2.42076e-05	Arl8/Khc/Liprin-alpha/Kap3/Klp64D/Fmr1/Klp68D/Sec5/Arp1/Aplip1/Rab1/BORCS5
GO:BP	endosome transport via multivesicular body sorting pathway	GO:0032509	18/3338	26/12653	5.90764e-06	4.54935e-05	2.4401e-05	shrb/Vta1/Mvb12/CG30423/Stam/lsn/Vps28/Mon1/CHMP2B/Ist1/Vps20/CG15012/Rab5/Rab7/mop/Hrs/Chmp1/Vps24
GO:BP	ERAD pathway	GO:0036503	25/3338	42/12653	5.92848e-06	4.55345e-05	2.44229e-05	Calr/Cnx99A/TER94/CG1317/Der-2/Der-1/sordd1/alpha-Man-Ib/Ufd1/sordd2/Ube4A/Edem1/CG8405/sip3/Gp93/Trc8/Rpt4/Uggt/CG6766/CG15814/CG8042/CG5823/Edem2/Ubc7/Faf2
GO:BP	eye morphogenesis	GO:0048592	132/3338	358/12653	6.33995e-06	4.84412e-05	2.5982e-05	mbl/Ras85D/Actbeta/hth/CadN/SCAR/siz/bnl/Vav/cic/SP2353/fred/shi/Khc/alphaSnap/14-3-3zeta/Nf-YB/rin/Nhe2/Rab11/hbs/Usp47/Hrb87F/aop/mbt/capt/cindr/aux/CadN2/rdx/kirre/Raf/fzr/Usp5/Liprin-alpha/arm/Asap/jeb/ArfGAP3/Mob2/stan/Efa6/Atx2/Doa/drk/Past1/Pcyt1/Tao/vimar/Fur2/Lam/fry/Frl/spg/noc/Kr-h1/GAA1/Hs3st-B/msk/rl/Amph/Socs36E/Cul3/Syn2/nej/Egm/Rho1/Ire1/beat-Ia/Dsor1/Mad/Apc/Vps4/Vang/yrt/tutl/S/…
GO:BP	sensory organ morphogenesis	GO:0090596	132/3338	358/12653	6.33995e-06	4.84412e-05	2.5982e-05	mbl/Ras85D/Actbeta/hth/CadN/SCAR/siz/bnl/Vav/cic/SP2353/fred/shi/Khc/alphaSnap/14-3-3zeta/Nf-YB/rin/Nhe2/Rab11/hbs/Usp47/Hrb87F/aop/mbt/capt/cindr/aux/CadN2/rdx/kirre/Raf/fzr/Usp5/Liprin-alpha/arm/Asap/jeb/ArfGAP3/Mob2/stan/Efa6/Atx2/Doa/drk/Past1/Pcyt1/Tao/vimar/Fur2/Lam/fry/Frl/spg/noc/Kr-h1/GAA1/Hs3st-B/msk/rl/Amph/Socs36E/Cul3/Syn2/nej/Egm/Rho1/Ire1/beat-Ia/Dsor1/Mad/Apc/Vps4/Vang/yrt/tutl/S/…
GO:BP	vacuole organization	GO:0007033	31/3338	57/12653	6.4824e-06	4.91456e-05	2.63598e-05	Atg1/TER94/Synj/Atg3/EndoA/bchs/Lamtor1/Atg17/Hs3st-B/Vps16A/Atg18b/EMC6/Snx6/Atg14/Vps4/FIG4/CG11975/spin/Rab1/Rab7/Atg9/mv/Atg13/Aduk/Mitf/Atg8a/p47/Pi3K59F/SH3PX1/Atg18a/or
GO:BP	regulation of actin filament polymerization	GO:0030833	31/3338	57/12653	6.4824e-06	4.91456e-05	2.63598e-05	Arpc3A/Kank/nwk/tmod/shi/svr/spoon/dco/Cip4/p38b/Atx2/gek/Lam/LRR/Arpc5/CG31715/Arpc2/Ssrp/PsGEF/Cortactin/Vrp1/RhoGAP92B/DAAM/Arpc4/cpb/twf/Svil/Gel/Cdc42/cpa/Nup98-96
GO:BP	ERK1 and ERK2 cascade	GO:0070371	27/3338	47/12653	6.46267e-06	4.91456e-05	2.63598e-05	Ras85D/Vav/Usp47/Raf/CG6180/ATPsynD/drk/spg/Ubc6/rl/poe/Ptp61F/Dsor1/alph/Cbl/Cdc37/M1BP/sNPF-R/step/Alk/Ufd4/cnk/Kcmf1/sty/Spred/RhoGAP5A/PTP-ER
GO:BP	ncRNA processing	GO:0034470	114/3338	301/12653	6.54143e-06	4.94654e-05	2.65313e-05	Cbp20/CG6999/CG4866/drosha/AGO2/Nopp140/mRpS11/Ars2/CG1789/CG32706/CG11030/AlaRS/CG2260/CG6724/dbe/CG4610/CG3434/Rrp47/CG11123/Nbr/Dph3/CG14618/Non3/CG1463/Mtr4/CG14805/wuho/LTV1/Trm7-32/Elp2/Pop5/CG2034/Trmt112/CG7637/Snp/rswl/CG4364/omd/IntS10/IntS9/Nop60B/CG1750/CycC/CG32409/IntS6/Uba4/Rpp25/CG7275/CG31249/Urm1/CG32708/Ddx1/Nsun5/Sas10/Dbp45A/IntS1/Tgt/fid/CG6833/CG10903/Gasz/CG11342/CG11417/C…
GO:BP	protein polyubiquitination	GO:0000209	46/3338	97/12653	6.58438e-06	4.96621e-05	2.66369e-05	Ubc2/HUWE1/Cul1/gcl/UbcE2H/Uba1/ari-1/ben/Iru/Mkrn1/Herc4/rdx/Bruce/msl-2/hyd/Ubr3/slmb/CG4238/Ubc6/CG4080/Cul3/Ube4A/Ubc4/pall/Pli/CG9855/CG17019/Traf6/CG14435/CG7220/Diap2/CG8188/roq/CG7656/STUB1/morgue/mib2/Ufd4/Ubc10/CG2218/CG2924/CG5823/elgi/Fbxl4/ida/Ubc7
GO:BP	locomotory behavior	GO:0007626	81/3338	199/12653	6.66321e-06	4.97572e-05	2.66878e-05	slgA/Ac3/CASK/slmo/shep/Marf/Atpalpha/Khc/kairos/Kdm5/ben/drpr/Gpo1/dco/dod/Mid1/Ih/sgg/SERCA/Pink1/tara/unc80/Atx2/G9a/Nlg2/caz/Nf1/Pdfr/Sema2a/CalpA/slmb/sxc/dj-1beta/na/Smn/rig/Cul3/cu/fbl/nej/Rho1/Gpdh1/jet/Fmr1/MsR1/Tbh/unc79/tutl/Eb1/dome/dysc/oc/sbb/lov/Dh44/Cirl/Hmgcr/Syt1/shakB/BTBD9/Itpr/krz/Trim9/TBPH/hop/Rac1/MsR2/hiw/cyc/Galphaq/CkIIalpha/InR/Gem3/spas/FMRFaR/Mbs/twz/tay/tyf/ebo/kay
GO:BP	negative regulation of growth	GO:0045926	51/3338	111/12653	6.66328e-06	4.97572e-05	2.66878e-05	plum/nwk/TSG101/Larp4B/cic/Syx7/sima/RASSF8/ena/dbo/stj/Cip4/Abl/sgg/Dad/lig/Mob2/Fak/Nf1/RtGEF/Sema2a/Tao/dj-1beta/raptor/SCCRO3/Ythdf/Akt/Mnt/Liprin-gamma/Fmr1/Fsn/Ac76E/Src64B/Sema1a/Trc8/Rae1/hfp/SkpA/Sema1b/Patr-1/TBPH/scyl/Pten/hiw/chrb/spas/Syp/Scm/Strip/Ide/bif
GO:BP	negative regulation of cellular catabolic process	GO:0031330	29/3338	52/12653	6.62138e-06	4.97572e-05	2.66878e-05	Ras85D/CG5026/Usp47/Sec61beta/Sik3/Lkb1/Raf/scny/Sec61alpha/Rheb/Bruce/wcy/rl/Akt/CG8209/chico/CSN5/mask/CG12384/Pi3K92E/Rab39/eIF3h/Tor/CG42458/sesB/CkIIalpha/InR/mbf1/Rubicon
GO:BP	negative regulation of protein-containing complex disassembly	GO:0043242	17/3338	24/12653	6.66482e-06	4.97572e-05	2.66878e-05	tmod/Patronin/beta-Spec/LRR/CG31715/alpha-Spec/Apc/Rab39/cpb/tacc/twf/Svil/Mnat9/Vhl/spas/Gel/cpa
GO:BP	regulation of Ras protein signal transduction	GO:0046578	40/3338	81/12653	7.61689e-06	5.67207e-05	3.04228e-05	RhoGEF3/siz/CG18659/CG9098/14-3-3zeta/Uba1/ArfGAP1/Sur-8/CG34393/garz/Rlip/Efa6/Nf1/vap/RhoGAP1A/CG7369/Ziz/PsGEF/Fnta/RhoGAP92B/Gapvd1/alph/Sec71/Rab3GAP1/pns/Crag/step/Sbf/Hmgcr/cnk/CG4853/raskol/CG42674/sty/Rab3-GEF/ca/Strip/betaggt-I/cv-c/Rgl
GO:BP	ion homeostasis	GO:0050801	63/3338	146/12653	7.72556e-06	5.73843e-05	3.07787e-05	VhaAC45/Cbp53E/Rbcn-3A/Nmdar1/IscU/CG1090/CG10470/CG14757/Atpalpha/EMRE/kcc/Nckx30C/CG42542/Nhe2/nrv3/Scox/SPoCk/mfrn/Raf/ABCB7/SERCA/Ctr1A/unc80/VhaAC39-1/Zip99C/CG6523/Pdfr/AGBE/ZnT49B/PMCA/Mvl/emei/Fer1HCH/Grx1/Wnk/Stim/SelG/Syx5/MICU3/Nhe1/Vha68-1/CG10362/CG17593/Nhe3/Vha100-1/ClC-c/Irp-1B/CG10413/MICU1/RyR/Itpr/Zip71B/CG11367/Ae2/GPHR/Catsup/anne/sesB/ZnT77C/zyd/Cisd2/Atox1/scaf6
GO:BP	cellular response to topologically incorrect protein	GO:0035967	30/3338	55/12653	8.42674e-06	6.24345e-05	3.34874e-05	Trap1/TER94/Spp/Xbp1/Der-2/rdx/Der-1/sordd1/Hsp60A/Herp/Ufd1/crc/sordd2/CG3061/Cul3/Hsc70-5/Ire1/Edem1/sip3/CG32276/Hsc70-1/Hsc70-4/STUB1/Uggt/CG6766/Hsp70Ba/CG5199/PEK/Atf6/Edem2
GO:BP	response to peptide hormone	GO:0043434	45/3338	95/12653	8.58096e-06	6.32576e-05	3.39289e-05	Cul1/Lpin/sima/Usp47/Ns3/GlyP/Mkrn1/Sik3/Rheb/sgg/S6k/drk/Glo1/slmb/raptor/Sirt1/rl/wrd/Ptp61F/Pp2A-29B/Akt/Dsor1/chico/Fmr1/Pi3K92E/Cdc37/SkpA/HDAC4/step/STUB1/srl/CG32638/Pdk1/Sik2/Roc1a/Rab10/cnk/nclb/Tor/Pten/Pi3K21B/InR/Thor/Ide/PRAS40
GO:BP	response to peptide	GO:1901652	45/3338	95/12653	8.58096e-06	6.32576e-05	3.39289e-05	Cul1/Lpin/sima/Usp47/Ns3/GlyP/Mkrn1/Sik3/Rheb/sgg/S6k/drk/Glo1/slmb/raptor/Sirt1/rl/wrd/Ptp61F/Pp2A-29B/Akt/Dsor1/chico/Fmr1/Pi3K92E/Cdc37/SkpA/HDAC4/step/STUB1/srl/CG32638/Pdk1/Sik2/Roc1a/Rab10/cnk/nclb/Tor/Pten/Pi3K21B/InR/Thor/Ide/PRAS40
GO:BP	compound eye morphogenesis	GO:0001745	126/3338	341/12653	9.07659e-06	6.67437e-05	3.57987e-05	mbl/Ras85D/Actbeta/hth/CadN/SCAR/siz/bnl/Vav/SP2353/fred/shi/alphaSnap/14-3-3zeta/Nf-YB/rin/Nhe2/Rab11/hbs/Usp47/Hrb87F/aop/mbt/capt/cindr/aux/CadN2/rdx/kirre/Raf/fzr/Usp5/Liprin-alpha/arm/Asap/jeb/ArfGAP3/Mob2/stan/Efa6/Atx2/Doa/drk/Past1/Pcyt1/Tao/vimar/Fur2/Lam/fry/Frl/spg/noc/Kr-h1/GAA1/Hs3st-B/msk/rl/Amph/Socs36E/Cul3/Syn2/nej/Egm/Rho1/Ire1/Dsor1/Mad/Apc/Vps4/Vang/tutl/S/CSN5/Synd/Su(dx)/mas…
GO:BP	purine nucleoside triphosphate biosynthetic process	GO:0009145	20/3338	31/12653	9.24968e-06	6.76772e-05	3.62994e-05	blw/ATPsyngamma/ATPsynbeta/Scox/ATPsynF/ATPsynD/CLS/ATPsynCF6/sun/CG11035/ras/ATPsyndelta/ATPsynbetaL/ATPsynE/ATPsynO/ATPsynG/ATPsynC/awd/CG3337/sesB
GO:BP	purine ribonucleoside triphosphate biosynthetic process	GO:0009206	20/3338	31/12653	9.24968e-06	6.76772e-05	3.62994e-05	blw/ATPsyngamma/ATPsynbeta/Scox/ATPsynF/ATPsynD/CLS/ATPsynCF6/sun/CG11035/ras/ATPsyndelta/ATPsynbetaL/ATPsynE/ATPsynO/ATPsynG/ATPsynC/awd/CG3337/sesB
GO:BP	epithelial cell differentiation	GO:0030855	130/3338	354/12653	9.3683e-06	6.83746e-05	3.66735e-05	Ras85D/CASK/loco/baz/capu/orb/Vav/zip/shi/Uba1/rin/Rab11/hbs/spoon/Dp/CG41099/ena/aop/dop/cindr/Lkb1/Not1/garz/Raf/Cip4/Abl/nudE/sgg/SERCA/Rop/lig/mam/stan/Stat92E/Parp/Axn/drk/Tao/par-1/slmb/fs(2)ltoPP43/fry/Prosalpha7/Smr/Dhc64C/Socs36E/nej/Akt/Rho1/hep/Ssrp/Rab4/ATP6AP2/Dsor1/chico/Mad/Rab35/Apc/Vang/yrt/veli/kel/Cortactin/Ptpmeg2/dome/da/Src64B/Cbl/Pi3K92E/Rpt4/csw/Hsc70-4/cos/Sec5/mats/trc/M…
GO:BP	post-Golgi vesicle-mediated transport	GO:0006892	23/3338	38/12653	9.47128e-06	6.89547e-05	3.69846e-05	comt/Rab11/Nsf2/AP-1gamma/sau/fidipidine/CG15099/Exo84/Sec10/Arfrp1/Sec71/wls/Sec5/Vps52/Gga/Crag/Sec6/CG5447/Sec15/strat/Sec8/or/Lerp
GO:BP	response to nitrogen compound	GO:1901698	87/3338	219/12653	9.69027e-06	7.03744e-05	3.77461e-05	Calr/Cnx99A/Cul1/TER94/5-HT7/Lpin/CG1317/sima/Der-2/Usp47/Ns3/GlyP/dco/Mkrn1/Sik3/Der-1/sordd1/Rheb/Crtc/alpha-Man-Ib/sgg/S6k/drk/Lamtor1/5-HT2A/Tao/Glo1/slmb/Ufd1/raptor/Sirt1/sordd2/rl/Lamtor3/wrd/Ptp61F/Ube4A/Pp2A-29B/Akt/Edem1/Dsor1/chico/CG8405/Fmr1/sip3/Gp93/Trc8/Pi3K92E/Rpt4/Cdc37/SkpA/HDAC4/RagA-B/step/STUB1/5-HT2B/tho2/srl/CG32638/Uggt/CG6766/CG15814/Pdk1/Sik2/Roc1a/Rab10/cnk/POSH/nclb/T…
GO:BP	negative regulation of developmental process	GO:0051093	85/3338	213/12653	9.95354e-06	7.21079e-05	3.86759e-05	plum/Ras85D/nwk/tws/CadN/TSG101/hdc/bnl/cic/Ctr9/Syx7/Kdm5/RASSF8/ena/aop/lqf/C1GalTA/dbo/stj/Cip4/Bruce/Abl/sgg/Dad/lig/Pink1/Mob2/Fak/Stat92E/Nf1/RtGEF/Sema2a/Tao/slmb/dj-1beta/fry/raptor/Kr-h1/Hs3st-B/Socs36E/Ythdf/Akt/MAGE/osa/Liprin-gamma/chico/Mad/Fmr1/Apc/Sps1/Fsn/CSN5/Ac76E/mask/alph/Src64B/Sema1a/Rae1/RasGAP1/cdi/mor/trc/SkpA/lwr/Sema1b/tkv/Patr-1/TBPH/Pten/hiw/sty/brm/enok/Spn/Ntan1/Bap…
GO:BP	tRNA metabolic process	GO:0006399	65/3338	153/12653	1.0375e-05	7.49761e-05	4.02143e-05	ThrRS/TyrRS/GatA/AspRS-m/TrpRS/AlaRS/CG4610/CG3434/Polr2K/Dph3/CG14618/CysRS-m/Polr2F/wuho/Polr2H/Trm7-32/Elp2/Pop5/CG2034/Trmt112/alpha-PheRS/rswl/CG1750/Uba4/Rpp25/CG31249/Urm1/SerRS/Polr2L/Ddx1/LeuRS/Tgt/fid/TyrRS-m/TrpRS-m/GlyRS/CG8078/Trf/CG9386/SecS/Pop4/Zcchc7/CG18048/IleRS/Trm7-34/GatB/AsnRS/Dtd/Pus1/Suv3/Slimp/PheRS-m/Polr1D/Mettl2/CG3368/ArgRS/ArgRS-m/Rrp42/CG3587/Rrp6/CG5292/scu/RtcB/P…
GO:BP	response to insulin	GO:0032868	44/3338	93/12653	1.11835e-05	8.04223e-05	4.31354e-05	Cul1/Lpin/sima/Usp47/Ns3/GlyP/Mkrn1/Sik3/Rheb/sgg/S6k/drk/Glo1/slmb/raptor/Sirt1/rl/wrd/Ptp61F/Pp2A-29B/Akt/Dsor1/chico/Fmr1/Pi3K92E/Cdc37/SkpA/HDAC4/step/STUB1/srl/Pdk1/Sik2/Roc1a/Rab10/cnk/nclb/Tor/Pten/Pi3K21B/InR/Thor/Ide/PRAS40
GO:BP	establishment or maintenance of polarity of follicular epithelium	GO:0016334	19/3338	29/12653	1.11766e-05	8.04223e-05	4.31354e-05	loco/orb/rin/spoon/Dp/Raf/sds22/lig/Parp/Dg/Cbl/csw/aPKC/brn/Patj/Abi/sty/awd/Vhl
GO:BP	positive regulation of transcription, DNA-templated	GO:0045893	148/3338	414/12653	1.23882e-05	8.83937e-05	4.74109e-05	mnb/tou/E2f1/exd/hth/ADD1/Lpin/Ctr9/SREBP/lgs/scf/Wbp2/Nf-YB/Xbp1/sno/CG18766/sima/Kdm5/trh/Cdk12/Ssdp/Hcf/Su(var)205/not/RYBP/arm/bon/Crtc/dmpd/CG9776/atms/mam/Camta/MBD-R2/Iswi/key/CG12054/crc/Axud1/Ssb-c31a/Cf2/fry/Sgf11/Met/REPTOR-BP/CG10555/Eaf/Rtf1/nej/Rcd1/CG1603/hep/osa/MED19/Mad/gce/CycK/MTF-1/Asx/Hr3/Gcn5/Sec13/sage/mask/da/CG10543/CycC/CG2199/Rpt4/dre4/lilli/wda/Su(var)3-3/CG11560/oc/N…
GO:BP	positive regulation of RNA biosynthetic process	GO:1902680	148/3338	414/12653	1.23882e-05	8.83937e-05	4.74109e-05	mnb/tou/E2f1/exd/hth/ADD1/Lpin/Ctr9/SREBP/lgs/scf/Wbp2/Nf-YB/Xbp1/sno/CG18766/sima/Kdm5/trh/Cdk12/Ssdp/Hcf/Su(var)205/not/RYBP/arm/bon/Crtc/dmpd/CG9776/atms/mam/Camta/MBD-R2/Iswi/key/CG12054/crc/Axud1/Ssb-c31a/Cf2/fry/Sgf11/Met/REPTOR-BP/CG10555/Eaf/Rtf1/nej/Rcd1/CG1603/hep/osa/MED19/Mad/gce/CycK/MTF-1/Asx/Hr3/Gcn5/Sec13/sage/mask/da/CG10543/CycC/CG2199/Rpt4/dre4/lilli/wda/Su(var)3-3/CG11560/oc/N…
GO:BP	positive regulation of nucleic acid-templated transcription	GO:1903508	148/3338	414/12653	1.23882e-05	8.83937e-05	4.74109e-05	mnb/tou/E2f1/exd/hth/ADD1/Lpin/Ctr9/SREBP/lgs/scf/Wbp2/Nf-YB/Xbp1/sno/CG18766/sima/Kdm5/trh/Cdk12/Ssdp/Hcf/Su(var)205/not/RYBP/arm/bon/Crtc/dmpd/CG9776/atms/mam/Camta/MBD-R2/Iswi/key/CG12054/crc/Axud1/Ssb-c31a/Cf2/fry/Sgf11/Met/REPTOR-BP/CG10555/Eaf/Rtf1/nej/Rcd1/CG1603/hep/osa/MED19/Mad/gce/CycK/MTF-1/Asx/Hr3/Gcn5/Sec13/sage/mask/da/CG10543/CycC/CG2199/Rpt4/dre4/lilli/wda/Su(var)3-3/CG11560/oc/N…
GO:BP	positive regulation of nervous system development	GO:0051962	51/3338	113/12653	1.24125e-05	8.83937e-05	4.74109e-05	Dap160/mnb/Actbeta/Octbeta2R/atl/ari-1/sif/Nedd4/Pak3/nudC/Rheb/GM130/nudE/Sdc/stan/Arp2/G9a/caz/stau/RhoGAP68F/Smn/Sec23/Arp3/wit/Sar1/Mad/Fmr1/simj/Vang/RhoGAP92B/Synd/Wnt5/Pi3K92E/Cdc37/nmo/dsh/Arfip/aPKC/Rab1/tkv/cpb/DCTN1-p150/PlexB/Tor/Rac1/trol/lva/InR/spas/Sec8/zld
GO:BP	cation homeostasis	GO:0055080	62/3338	145/12653	1.28907e-05	9.15773e-05	4.91185e-05	VhaAC45/Cbp53E/Rbcn-3A/Nmdar1/IscU/CG1090/CG10470/CG14757/Atpalpha/EMRE/kcc/Nckx30C/CG42542/Nhe2/nrv3/Scox/SPoCk/mfrn/Raf/ABCB7/SERCA/Ctr1A/unc80/VhaAC39-1/Zip99C/CG6523/Pdfr/AGBE/ZnT49B/PMCA/Mvl/emei/Fer1HCH/Grx1/Stim/SelG/Syx5/MICU3/Nhe1/Vha68-1/CG10362/CG17593/Nhe3/Vha100-1/ClC-c/Irp-1B/CG10413/MICU1/RyR/Itpr/Zip71B/CG11367/Ae2/GPHR/Catsup/anne/sesB/ZnT77C/zyd/Cisd2/Atox1/scaf6
GO:BP	ATP biosynthetic process	GO:0006754	18/3338	27/12653	1.33447e-05	9.43451e-05	5.06031e-05	blw/ATPsyngamma/ATPsynbeta/Scox/ATPsynF/ATPsynD/CLS/ATPsynCF6/sun/CG11035/ATPsyndelta/ATPsynbetaL/ATPsynE/ATPsynO/ATPsynG/ATPsynC/CG3337/sesB
GO:BP	organelle transport along microtubule	GO:0072384	18/3338	27/12653	1.33447e-05	9.43451e-05	5.06031e-05	Marf/Khc/Khc-73/milt/dop/Liprin-alpha/nudE/Pink1/gammaCOP/Dhc64C/Arp10/Arp1/Aplip1/BORCS5/DCTN1-p150/jar/Klp98A/Miro
GO:BP	protein K48-linked ubiquitination	GO:0070936	10/3338	11/12653	1.35276e-05	9.51796e-05	5.10506e-05	rdx/hyd/Ubr3/Cul3/Pli/CG17019/CG14435/Diap2/CG7656/CG2924
GO:BP	positive regulation of lamellipodium organization	GO:1902745	10/3338	11/12653	1.35276e-05	9.51796e-05	5.10506e-05	SCAR/Abl/Naus/LRR/hep/Arp3/HSPC300/aPKC/psidin/Cdc42
GO:BP	negative regulation of catabolic process	GO:0009895	30/3338	56/12653	1.35913e-05	9.53995e-05	5.11686e-05	Ras85D/CG5026/Usp47/Sec61beta/Sik3/Lkb1/Raf/scny/Sec61alpha/Rheb/Bruce/wcy/rl/Akt/schlank/CG8209/chico/CSN5/mask/CG12384/Pi3K92E/Rab39/eIF3h/Tor/CG42458/sesB/CkIIalpha/InR/mbf1/Rubicon
GO:BP	regulation of cell development	GO:0060284	74/3338	181/12653	1.36478e-05	9.55675e-05	5.12587e-05	Dap160/Actbeta/tws/CadN/Cul1/atl/hdc/Ctr9/ari-1/aop/unk/mbt/Mkrn1/sif/Nedd4/nudC/Rheb/GM130/nudE/stan/G9a/Sema2a/slmb/Kr-h1/Hs3st-B/Dhc64C/Ythdf/MAGE/Sec23/Sar1/osa/barc/Fmr1/Vang/CSN5/mask/Sema1a/Sec71/Wnt5/Pi3K92E/csw/spn-F/oc/mor/Cdc37/tinc/Rcc1/dsh/lwr/aPKC/Rab1/Sema1b/Roc1a/bsk/DCTN1-p150/SoxN/PlexB/Nup154/Rac1/trol/Pten/Sox14/sty/brm/Ntan1/Bap60/lva/brat/InR/spas/sd/Mbs/zld/bif
GO:BP	presynapse organization	GO:0099172	26/3338	46/12653	1.43001e-05	9.98965e-05	5.35806e-05	Syn/CASK/Atg1/Nlg4/Arl8/Liprin-alpha/Vap33/p38b/Nrx-IV/ND-20/S6k/Arp2/Nlg2/Smn/Arp3/Nrx-1/Fmr1/Aplip1/TBPH/Tor/hiw/Spn/Nlg3/spas/Thor/Nup75
GO:BP	protein secretion	GO:0009306	39/3338	80/12653	1.45216e-05	0.000101203	5.42814e-05	tbc/Sec24CD/Use1/Tango9/Tango5/Tpst/Bet3/garz/Madm/deltaCOP/SrpRalpha/gammaCOP/Doa/gry/AdipoR/CG5021/Fam92/Vps35/Rab3/Syx5/Tango11/Sar1/Flo2/S/RhoGAP92B/Ehbp1/wls/Tango6/PICK1/Tango14/Tango10/Crag/Tango1/puc/Rab1/Rab8/Rab10/mop/Hrs
GO:BP	cortical cytoskeleton organization	GO:0030865	36/3338	72/12653	1.51e-05	0.000104985	5.63097e-05	loco/flw/SCAR/shi/Patronin/Rab11/Srpk79D/fwd/Graf/sau/Lam/DCP2/brun/Frl/Rab3/Exo84/ghi/Arpc2/Rho1/Ocrl/vib/fws/Moe/Sbf/Arpc4/Cog7/Det/Abi/Rac1/mtm/CG30183/Rab21/Rab3-GEF/Cdc42/Sec8/cv-c
GO:BP	regulation of phosphate metabolic process	GO:0019220	76/3338	188/12653	1.68913e-05	0.000116884	6.26922e-05	l(3)80Fj/Dap160/Actbeta/elm/bnl/Ccm3/shi/SNF4Agamma/CG9098/svr/CG9578/Scox/dco/Sik3/Lk6/p38b/CG14408/Wee1/Hexim/sgg/Dad/Mob2/Axn/Eph/par-1/Dd/Atg17/fry/raptor/Cad96Ca/I-2/CG30291/Rho1/Ret/Ssrp/CG40191/Dg/CycY/Atg14/CG11035/endos/pcs/fmt/Cbl/Pi3K92E/ASPP/CG13994/mats/CG10376/step/Mat1/Ankle2/Alk/Mekk1/PPP1R15/Patj/Cdk7/Tor/Abi/Rac1/PIP5K59B/Atg13/Pten/Tap42/Cds/CG7044/sty/CG3337/sesB/Pi3K21B/InR/d…
GO:BP	regulation of phosphorus metabolic process	GO:0051174	76/3338	188/12653	1.68913e-05	0.000116884	6.26922e-05	l(3)80Fj/Dap160/Actbeta/elm/bnl/Ccm3/shi/SNF4Agamma/CG9098/svr/CG9578/Scox/dco/Sik3/Lk6/p38b/CG14408/Wee1/Hexim/sgg/Dad/Mob2/Axn/Eph/par-1/Dd/Atg17/fry/raptor/Cad96Ca/I-2/CG30291/Rho1/Ret/Ssrp/CG40191/Dg/CycY/Atg14/CG11035/endos/pcs/fmt/Cbl/Pi3K92E/ASPP/CG13994/mats/CG10376/step/Mat1/Ankle2/Alk/Mekk1/PPP1R15/Patj/Cdk7/Tor/Abi/Rac1/PIP5K59B/Atg13/Pten/Tap42/Cds/CG7044/sty/CG3337/sesB/Pi3K21B/InR/d…
GO:BP	ribonucleoprotein complex biogenesis	GO:0022613	121/3338	329/12653	1.7441e-05	0.000120404	6.45801e-05	CG8565/su(w[a])/Prp18/CG6999/mxt/eIF5/CG4866/drosha/mRpL20/Ns3/AGO2/Srpk79D/Nopp140/mRpS11/Rheb/CG1789/CG32706/CG11563/eIF3a/CG11030/P32/pix/emb/Nmd3/CG2260/RpL38/CG6724/CG32262/snRNP-U1-C/dbe/SmD2/Rrp47/CG11123/Smn/CG10286/Ran/rig/Prp39/Non3/CG1463/CG7488/Mtr4/SRPK/CG14805/CG33158/LTV1/CG12608/eIF2beta/Prp31/HPS4/Pop5/mRpS7/Trmt112/CG7637/Snp/CG4364/Nop60B/RpL35A/CG32409/CG7275/Hsc70-4/CG32708/N…
GO:BP	glycerolipid biosynthetic process	GO:0045017	46/3338	100/12653	1.78608e-05	0.000123013	6.59794e-05	Acsl/FASN1/Lpin/Pcyt2/CG2201/frj/Taz/Ipp/Pect/nes/fwd/Ttc7/bbc/PIG-T/Pcyt1/CLS/Dd/CG9391/GAA1/CG7990/Socs36E/PIG-G/PIG-L/Dpm3/Hyccin/PIG-F/Socs16D/Mppe/PGAP5/Pi3K92E/PGS1/Agpat1/PIG-K/PIG-S/PIG-Q/puml/PIP5K59B/Cds/CG7149/ACC/rdgA/Pi3K21B/CG33116/CG7789/Pi3K59F/CG15743
GO:BP	negative regulation of protein depolymerization	GO:1901880	16/3338	23/12653	1.81089e-05	0.00012443	6.67393e-05	tmod/Patronin/beta-Spec/LRR/CG31715/alpha-Spec/Apc/cpb/tacc/twf/Svil/Mnat9/Vhl/spas/Gel/cpa
GO:BP	ubiquitin-dependent ERAD pathway	GO:0030433	20/3338	32/12653	1.85503e-05	0.000126868	6.80472e-05	Calr/Cnx99A/TER94/CG1317/Der-2/Der-1/alpha-Man-Ib/Ufd1/Ube4A/Edem1/sip3/Gp93/Rpt4/CG6766/CG15814/CG8042/CG5823/Edem2/Ubc7/Faf2
GO:BP	clathrin-dependent endocytosis	GO:0072583	20/3338	32/12653	1.85503e-05	0.000126868	6.80472e-05	Dap160/EndoB/Pkc53E/shi/lap/Synj/lqf/DCTN2-p50/aux/Nak/EndoA/BicD/AP-2sigma/CG8176/Rab5/Syt1/AP-2alpha/Rab7/Cubn/Dab
GO:BP	establishment of mitochondrion localization, microtubule-mediated	GO:0034643	11/3338	13/12653	1.91226e-05	0.000129574	6.94987e-05	Marf/Khc/milt/Pink1/Dhc64C/Arp10/Arp1/Aplip1/DCTN1-p150/jar/Miro
GO:BP	mitochondrion transport along microtubule	GO:0047497	11/3338	13/12653	1.91226e-05	0.000129574	6.94987e-05	Marf/Khc/milt/Pink1/Dhc64C/Arp10/Arp1/Aplip1/DCTN1-p150/jar/Miro
GO:BP	establishment of mitochondrion localization	GO:0051654	11/3338	13/12653	1.91226e-05	0.000129574	6.94987e-05	Marf/Khc/milt/Pink1/Dhc64C/Arp10/Arp1/Aplip1/DCTN1-p150/jar/Miro
GO:BP	positive regulation of axon guidance	GO:1902669	11/3338	13/12653	1.91226e-05	0.000129574	6.94987e-05	AMPKalpha/Rheb/S6k/stan/raptor/mmy/Vang/Wnt5/dsh/Tor/Rac1
GO:BP	cortical actin cytoskeleton organization	GO:0030866	32/3338	62/12653	1.94697e-05	0.000131622	7.05971e-05	loco/flw/SCAR/shi/Rab11/fwd/Graf/sau/Lam/DCP2/brun/Frl/Exo84/ghi/Arpc2/Rho1/Ocrl/vib/fws/Moe/Sbf/Arpc4/Cog7/Det/Abi/Rac1/mtm/CG30183/Rab21/Cdc42/Sec8/cv-c
GO:BP	ameboidal-type cell migration	GO:0001667	79/3338	198/12653	2.03386e-05	0.00013718	7.35781e-05	sli/Ras85D/CASK/baz/ths/dally/bnl/Vav/zip/shi/Rab11/spoon/ena/aop/dop/cindr/Raf/jeb/nudE/Sdc/Stat92E/Stam/drk/par-1/wol/slmb/Dhc64C/Socs36E/Akt/Rho1/hep/sfl/Dsor1/chico/Vang/veli/kel/Cortactin/Ptpmeg2/dome/Cbl/Pi3K92E/csw/Sec5/Sin3A/Rab5/Ggamma1/sqh/dsh/puc/kis/brn/Rab7/bsk/cpb/cnk/Hrs/jar/smog/hop/Abi/Rac1/psidin/CG42674/twf/Catsup/Rme-8/Sec6/awd/robo2/mys/InR/Sec15/Vhl/Pu/AdamTS-A/Sec8/Mtl/kay
GO:BP	embryonic development via the syncytial blastoderm	GO:0001700	75/3338	186/12653	2.12485e-05	0.000142989	7.66937e-05	Ras85D/Eip63E/Sac1/Vav/zip/Rab11/ena/aop/AGO2/Lkb1/kirre/raw/arm/Sec61alpha/slpr/Wee1/Abl/sgg/Nrx-IV/Bx42/Mcr/SelG/Rho1/hep/Arp3/Pkn/mmy/Cdc7/Rab30/yrt/Eb1/alph/Traf6/pum/Nmt/oc/Ddx1/Rab5/hid/step/Ggamma1/Ack/sns/sqh/dsh/lwr/puc/Sema1b/tkv/wal/bsk/jar/POSH/Rac1/ecd/scyl/Dab/chrb/sced/faf/alpha-Cat/FER/mys/ash1/l(3)mbt/InR/Mbs/Cdc42/sinu/barr/Jra/Mtl/cv-c/kay/cora
GO:BP	positive regulation of Wnt signaling pathway	GO:0030177	30/3338	57/12653	2.14902e-05	0.000143627	7.70358e-05	tws/flw/Eip63E/dally/Usp47/dco/Ssdp/Dyrk2/hyd/Kap3/Klp64D/Nulp1/Vps35/Wnk/nej/ATP6AP2/CycY/Flo2/Rnf146/wls/skd/ebd1/hyx/kto/apolpp/Pp1alpha-96A/nkd/rempA/CtBP/Tnks
GO:BP	response to topologically incorrect protein	GO:0035966	30/3338	57/12653	2.14902e-05	0.000143627	7.70358e-05	Trap1/TER94/Spp/Xbp1/Der-2/rdx/Der-1/sordd1/Hsp60A/Herp/Ufd1/crc/sordd2/CG3061/Cul3/Hsc70-5/Ire1/Edem1/sip3/CG32276/Hsc70-1/Hsc70-4/STUB1/Uggt/CG6766/Hsp70Ba/CG5199/PEK/Atf6/Edem2
GO:BP	neuron projection extension	GO:1990138	30/3338	57/12653	2.14902e-05	0.000143627	7.70358e-05	CadN/Atg1/atl/SCAR/fz2/CadN2/Liprin-alpha/stan/Sema2a/Frl/Ythdf/hep/Fmr1/Vang/DAAM/Sema1a/Wnt5/Rab5/CG15019/dsh/Sema1b/bsk/DCTN1-p150/Abi/Rac1/spas/Cdc42/path/Strip/bif
GO:BP	flight behavior	GO:0007629	13/3338	17/12653	2.29483e-05	0.000153023	8.20757e-05	ben/Gpo1/SERCA/Sema2a/rig/Gpdh1/Tbh/tutl/Eb1/Itpr/Galphaq/Gem3/ebo
GO:BP	eye photoreceptor cell differentiation	GO:0001754	84/3338	214/12653	2.31768e-05	0.000154196	8.2705e-05	mbl/Ras85D/Actbeta/hth/CadN/SP2353/Khc/14-3-3zeta/Nf-YB/rin/Rab11/hbs/Usp47/aop/mbt/capt/CadN2/Raf/Usp5/Liprin-alpha/jeb/Mob2/stan/Atx2/Doa/drk/Past1/Tao/vimar/Fur2/fry/spg/noc/Kr-h1/GAA1/msk/rl/Amph/Socs36E/Syn2/nej/Ire1/Dsor1/Mad/Vps4/yrt/tutl/S/CSN5/Synd/Su(dx)/mask/alph/Src64B/Cbl/csw/dysc/RasGAP1/oc/Moe/cdi/AP-1sigma/sw/Afti/tinc/dsh/Rab6/PIG-S/tkv/Alk/cnk/DCTN1-p150/hop/sv/Rac1/Pten/Dab/Sec…
GO:BP	protein stabilization	GO:0050821	24/3338	42/12653	2.37901e-05	0.000157919	8.47016e-05	Cnx99A/tws/CG7945/CSN7/14-3-3zeta/Usp47/Snx3/Sxl/CG9922/orb2/alien/trsn/CSN6/CSN5/da/ric8a/syd/Cdc37/CG8206/lwr/CSN3/CSN1b/CG12379/CSN8
GO:BP	positive regulation of cell differentiation	GO:0045597	53/3338	121/12653	2.39351e-05	0.000158523	8.50254e-05	Dap160/mnb/Ras85D/Actbeta/Cul1/atl/Nf-YB/ari-1/mbt/Mkrn1/sif/Raf/nudC/Rheb/GM130/nudE/stan/G9a/slmb/rl/Dhc64C/Sec23/Sar1/Fmr1/Vang/omd/DAAM/Sec71/Wnt5/Pi3K92E/spn-F/RasGAP1/oc/Cdc37/CG13001/IntS1/dsh/aPKC/Rab1/Roc1a/bsk/mop/DCTN1-p150/PlexB/Rac1/trol/Sox14/lva/IntS2/InR/spas/Pdcd4/zld
GO:BP	developmental growth involved in morphogenesis	GO:0060560	46/3338	101/12653	2.44912e-05	0.000161841	8.68051e-05	baz/CadN/Atg1/atl/SCAR/fz2/alphaSnap/Rab11/CadN2/Liprin-alpha/arm/slpr/Abl/Dad/stan/Sema2a/Frl/Ythdf/Rho1/hep/Fmr1/Vang/DAAM/Sema1a/Wnt5/vari/Rab5/CG15019/sqh/dsh/Sema1b/tkv/bsk/DCTN1-p150/Abi/Rac1/pygo/FER/mys/spas/Cdc42/path/Strip/bif/Mtl/kay
GO:BP	response to growth factor	GO:0070848	47/3338	104/12653	2.57226e-05	0.000169215	9.07606e-05	Ras85D/ths/dally/bnl/Lpin/anchor/Med/Ptp10D/aop/lqf/Raf/p38b/Dad/Ptp4E/gro/drk/Tao/Dd/sxc/vap/cv/rl/Ptp61F/wit/sfl/Dsor1/Mad/nord/Src64B/csw/RasGAP1/spin/Ack/Cul2/lwr/lili/tkv/cnk/MAN1/cv-2/nst/trol/hiw/sty/faf/cv-d/PRAS40
GO:BP	cellular response to growth factor stimulus	GO:0071363	47/3338	104/12653	2.57226e-05	0.000169215	9.07606e-05	Ras85D/ths/dally/bnl/Lpin/anchor/Med/Ptp10D/aop/lqf/Raf/p38b/Dad/Ptp4E/gro/drk/Tao/Dd/sxc/vap/cv/rl/Ptp61F/wit/sfl/Dsor1/Mad/nord/Src64B/csw/RasGAP1/spin/Ack/Cul2/lwr/lili/tkv/cnk/MAN1/cv-2/nst/trol/hiw/sty/faf/cv-d/PRAS40
GO:BP	dendrite development	GO:0016358	72/3338	178/12653	2.7195e-05	0.000178502	9.57414e-05	sli/Hasp/CadN/TER94/Dlic/shrb/dally/futsch/Khc/prel/AMPKalpha/ct/ena/jim/Nedd4/Ulp1/nudC/Nak/Abl/GM130/nudE/Rop/S6k/stan/fra/G9a/TrpRS/Sema2a/E(Pc)/meigo/fry/Dhc64C/Cul3/Tm1/Akt/Rho1/Sec23/Ret/wit/Sar1/Fmr1/pho/tutl/Sema1a/Wnt5/Pi3K92E/pum/SMC1/trc/Rab5/hid/vvl/robl/GlyRS/Rab1/sn/TBPH/Tor/Rac1/Pten/Sox14/Ptp69D/brm/pira/lva/ash2/sqz/spas/Cdc42/path/cv-c/kay
GO:BP	regulation of protein depolymerization	GO:1901879	18/3338	28/12653	2.81446e-05	0.000184322	9.88631e-05	atl/tmod/futsch/Patronin/beta-Spec/LRR/CG31715/alpha-Spec/Apc/cpb/tacc/twf/Svil/Mnat9/Vhl/spas/Gel/cpa
GO:BP	regulation of tube architecture, open tracheal system	GO:0035152	43/3338	93/12653	2.84052e-05	0.000185615	9.95565e-05	Rbcn-3A/Dlic/Sac1/Atpalpha/zip/Sec24CD/shi/CCT3/IKKepsilon/garz/deltaCOP/Nrx-IV/stan/gammaCOP/Mcr/Smn/Dhc64C/kkv/Rho1/Sec23/chico/Rab35/Blimp-1/mmy/DAAM/vari/Moe/pasi1/wkd/sqh/dsh/sano/kune/mew/DCTN1-p150/crok/awd/mys/Vhl/sinu/pasi2/cv-c/cora
GO:BP	nucleoside phosphate metabolic process	GO:0006753	91/3338	237/12653	2.95506e-05	0.00019267	0.000103341	Gapdh1/Pfk/Ac3/Hex-A/Ald1/Pde11/Cmpk/Acsl/CG6330/PyK/Eno/AMPdeam/blw/AdSS/ATPsyngamma/Pgi/ATPsynbeta/Pdhb/Tpi/Hmgs/CG8891/Scox/Gapdh2/Mdh1/ATPsynF/Aps/Sik3/ScsbetaG/Men/Nmnat/CG42813/Ak1/ATPsynD/CLS/Pgk/Pdha/Adk2/ATPsynCF6/sun/Papss/cu/bur/fbl/Gpdh1/Gycbeta100B/CG31183/Pglym78/Vha68-1/muc/Dg/CG8080/ScsbetaA/ATPCL/Nadsyn/CG11035/Sarm/CG33156/Ac76E/Dhod/DIP2/Gyc89Da/dnk/ras/ATPsyndelta/CG2246/Ak2/D…
GO:BP	positive regulation of endocytosis	GO:0045807	23/3338	40/12653	3.06314e-05	0.000199274	0.000106883	mnb/CASK/Pkc53E/lap/Syx7/drpr/cindr/garz/Nedd4/Graf/BicD/drk/Tao/Nrx-1/O-fut1/Cortactin/Sec71/Cbl/Moe/PICK1/AP-2alpha/krz/Uvrag
GO:BP	cellularization	GO:0007349	52/3338	119/12653	3.07949e-05	0.000199453	0.000106979	Septin2/TER94/pnut/shi/gcl/Rab11/Taz/AGO2/dop/aux/Lkb1/nes/Cip4/kuk/Graf/orb2/Past1/Duba/Npc1a/CLIP-190/Osbp/cnn/Dhc64C/Cul3/poe/Capr/Rho1/ScsbetaA/Fmr1/kel/Src64B/Sec5/sw/Rab5/Ack/porin/sqh/Act5C/aub/DCTN1-p150/tacc/jar/grau/Cds/Dab/faf/lva/HBS1/pelo/Septin1/Cdc42/zld
GO:BP	cellular cation homeostasis	GO:0030003	52/3338	119/12653	3.07949e-05	0.000199453	0.000106979	VhaAC45/Cbp53E/Rbcn-3A/IscU/CG1090/CG10470/Atpalpha/EMRE/Nckx30C/CG42542/Nhe2/nrv3/Scox/SPoCk/Raf/ABCB7/SERCA/Ctr1A/VhaAC39-1/Zip99C/CG6523/AGBE/ZnT49B/PMCA/emei/Fer1HCH/Stim/SelG/Syx5/MICU3/Nhe1/Vha68-1/CG10362/CG17593/Nhe3/Vha100-1/ClC-c/Irp-1B/MICU1/RyR/Itpr/Zip71B/CG11367/Ae2/GPHR/Catsup/anne/sesB/ZnT77C/zyd/Cisd2/scaf6
GO:BP	regulation of ERK1 and ERK2 cascade	GO:0070372	25/3338	45/12653	3.11571e-05	0.000201355	0.000107999	Ras85D/Vav/Usp47/Raf/CG6180/ATPsynD/drk/spg/Ubc6/poe/Ptp61F/alph/Cbl/Cdc37/M1BP/sNPF-R/step/Alk/Ufd4/cnk/Kcmf1/sty/Spred/RhoGAP5A/PTP-ER
GO:BP	epithelial cell migration	GO:0010631	73/3338	182/12653	3.35491e-05	0.000216336	0.000116034	sli/Ras85D/CASK/baz/dally/bnl/Vav/zip/shi/Rab11/spoon/ena/aop/dop/cindr/Raf/nudE/Sdc/Stat92E/Stam/drk/par-1/slmb/Dhc64C/Socs36E/Akt/Rho1/hep/sfl/Dsor1/chico/Vang/veli/kel/Cortactin/Ptpmeg2/dome/Cbl/Pi3K92E/csw/Sec5/Sin3A/Rab5/sqh/dsh/puc/kis/brn/Rab7/bsk/cpb/cnk/Hrs/jar/hop/Abi/Rac1/psidin/CG42674/twf/Catsup/Rme-8/Sec6/awd/robo2/mys/InR/Sec15/Vhl/Pu/AdamTS-A/Sec8/kay
GO:BP	Golgi to plasma membrane transport	GO:0006893	17/3338	26/12653	3.41844e-05	0.00021995	0.000117972	comt/Rab11/Nsf2/sau/fidipidine/Exo84/Sec10/Arfrp1/Sec71/wls/Sec5/Gga/Crag/Sec6/CG5447/Sec15/Sec8
GO:BP	cell motility	GO:0048870	140/3338	395/12653	3.43152e-05	0.000220308	0.000118165	kl-3/sli/Ras85D/CASK/Msp300/baz/SCAR/Evi5/ths/dally/bnl/Vav/zip/shi/fz2/sima/Rab11/spoon/alphaTub84D/ena/aop/dop/cindr/chb/Raf/fzr/not/nes/jeb/Abl/nudE/Sdc/Dad/wun/orb2/fra/Stat92E/Stam/drk/Sema2a/par-1/wol/slmb/Frl/LRR/Arpc5/Ostgamma/Dhc64C/Socs36E/nej/Akt/Rho1/hep/sfl/Dsor1/chico/p130CAS/Fmr1/Apc/Vang/veli/kel/Cortactin/Ptpmeg2/disp/CSN5/mask/dome/Plp/ttv/Sema1a/Cbl/Pi3K92E/pum/Invadolysin/csw/…
GO:BP	regulation of mRNA processing	GO:0050684	47/3338	105/12653	3.47714e-05	0.00022275	0.000119474	mbl/CG8565/CG6999/Hrb87F/Srpk79D/HnRNP-K/x16/Sxl/CG4119/CG14641/CG11360/snf/snRNP-U1-70K/Doa/Srp54/qkr58E-1/snRNP-U1-C/U2af38/qkr58E-2/swm/Prp39/SRPK/SF1/Fmr1/SF2/Cpsf6/Psi/CG2926/hfp/Dbp45A/Pep/ps/Tnpo-SR/ZC3H3/CG10418/Saf-B/Hrb98DE/pea/qkr54B/Spx/fand/Mettl3/Sf3a1/fl(2)d/pps/Prp19/CG5728
GO:BP	cell-cell adhesion	GO:0098609	61/3338	146/12653	3.51492e-05	0.000224679	0.000120509	sli/beat-IIa/plum/baz/CadN/beat-Ib/Nlg4/fred/Sec24CD/beat-IIb/Cad87A/beat-Ic/hbs/beat-VI/aop/mbt/Fas3/CadN2/beat-Vc/Lkb1/kirre/tei/arm/beat-IIIb/CG7166/stan/fra/Nrt/Nlg2/par-1/beat-Va/Cad96Ca/Sec23/Rab4/beat-Ia/p130CAS/tutl/Dscam3/CG34353/Cont/Src64B/glec/sns/brn/mew/tkv/caps/mop/POSH/CG13506/pygo/RanBPM/Dscam2/alpha-Cat/robo2/Bsg/Nlg3/mys/beat-Vb/Con/CG45049
GO:BP	dorsal/ventral pattern formation	GO:0009953	64/3338	155/12653	3.53913e-05	0.000225735	0.000121076	loco/orb/flw/gammaSnap1/dally/cic/Khc/rin/sno/Mpcp2/spoon/enc/Dp/drpr/tub/milt/capt/Raf/bai/lig/tara/BicD/Parp/tral/Axn/CalpA/wol/Cf2/CG14073/nmd/Hs3st-B/Dhc64C/osa/Dsor1/CG8405/Fmr1/S/CSN5/Su(dx)/spn-A/Cbl/lilli/csw/CG1943/sbb/nmo/skd/MFS14/tkv/Rab7/sty/Sulf1/tsu/faf/CkIIalpha/wek/CG5890/asun/Syp/sll/eca/mus301/Psn/jvl
GO:BP	mitotic cell cycle process	GO:1903047	123/3338	340/12653	3.57512e-05	0.000227043	0.000121777	E2f1/tws/Wdr62/TER94/ALiX/gammaTub23C/Eip63E/shrb/zip/pnut/shi/luna/alphaSnap/Mnn1/Patronin/Cdc27/DCTN2-p50/chb/Lkb1/fzr/Asap/Rheb/dmt/Wee1/nudE/sgg/Sap30/PhKgamma/sau/slmb/Lam/Rpn10/cnn/msps/DCTN6-p27/Ran/Dhc64C/Aven/nej/Rho1/Su(var)2-HP2/CG31687/Prp38/Pkn/Dsor1/Mad/Mad1/Rab35/Ocrl/Cdc7/RecQ5/endos/Nnf1a/Top2/Eb1/Synd/Mau2/spn-A/Rae1/twe/Invadolysin/ric8a/Moe/Klp10A/CG8188/mor/SA/CG5181/CG15237/…
GO:BP	positive regulation of programmed cell death	GO:0043068	37/3338	77/12653	3.57303e-05	0.000227043	0.000121777	E2f1/Atg1/TER94/pnut/Cp1/MED24/Dp/sigmar/Idh3b/rdx/Lkb1/Der-1/Clbn/Den1/Tspo/lncRNA:Hsromega/Drak/CG9231/l(3)psg2/SCCRO3/26-29-p/HtrA2/CG32202/Mdh2/Fmr1/PDCD-5/Cbl/hid/morgue/Utx/kto/Atg13/Pten/bel/Septin1/Pi3K59F/rpr
GO:BP	dorsal closure	GO:0007391	48/3338	108/12653	3.61322e-05	0.000228967	0.000122809	Ras85D/Sac1/Vav/zip/Rab11/ena/aop/Lkb1/raw/arm/Sec61alpha/slpr/Abl/Nrx-IV/Mcr/Rho1/hep/Pkn/mmy/Rab30/yrt/alph/Traf6/Nmt/Rab5/step/Ggamma1/Ack/dsh/lwr/puc/tkv/bsk/jar/POSH/Rac1/Dab/alpha-Cat/FER/mys/Mbs/Cdc42/sinu/Jra/Mtl/cv-c/kay/cora
GO:BP	epithelial tube morphogenesis	GO:0060562	49/3338	111/12653	3.73925e-05	0.000236443	0.000126819	Ras85D/Vha26/baz/TSG101/hdc/bnl/zip/Ptp10D/ct/trh/CCT3/Raf/raw/Nsf2/arm/Rheb/dmt/Dad/Ptp4E/gammaCOP/VhaAC39-1/Lam/noc/rl/kkv/Rho1/Dsor1/mmy/S/Vha100-1/Sec5/Moe/Hph/bs/VhaPPA1-1/aPKC/caps/wal/Tor/ecd/vkg/Cds/sty/form3/fand/stac/Cdc42/barr/cv-c
GO:BP	developmental cell growth	GO:0048588	38/3338	80/12653	3.89496e-05	0.000245759	0.000131816	CadN/Atg1/atl/SCAR/fz2/CadN2/eag/Liprin-alpha/stan/Nf1/Sema2a/Frl/poe/Ythdf/hep/chico/Fmr1/Vang/DAAM/Sema1a/Wnt5/Rab5/CG15019/dsh/Sema1b/bsk/DCTN1-p150/Nup154/Abi/Rac1/InR/jagn/spas/Cdc42/path/Strip/bif/kay
GO:BP	wing disc morphogenesis	GO:0007472	116/3338	318/12653	3.90906e-05	0.00024612	0.000132009	Ras85D/Actbeta/hth/flw/Gclc/dally/cic/zip/Hs6st/pnut/Lpin/fz2/lgs/alphaSnap/anchor/sno/svr/ct/unk/Nedd4/Raf/EloB/arm/Cip4/p38b/sgg/Dad/mam/stan/Stat92E/Axn/drk/Past1/Drak/Pcyt1/par-1/Dd/Grasp65/fry/peng/Hs3st-B/cv/msk/rl/Socs36E/Stim/Cul3/fbl/Rho1/sfl/Pkn/ebi/osa/ATP6AP2/Dg/Mad/EloA/nord/Vang/S/Asx/Su(dx)/dome/Dys/Cbl/wls/cos/RasGAP1/Su(var)3-3/sbb/mor/trc/Lpt/nmo/Pal1/bs/step/LIMK1/hyx/sqh/dsh/k…
GO:BP	negative regulation of supramolecular fiber organization	GO:1902904	22/3338	38/12653	3.93831e-05	0.000246901	0.000132428	Kank/tmod/Patronin/spoon/Cip4/beta-Spec/Efa6/LRR/RhoGAP68F/CG31715/alpha-Spec/Apc/RhoGAP92B/cpb/tacc/twf/Svil/Mnat9/Vhl/spas/Gel/cpa
GO:BP	positive regulation of establishment of protein localization	GO:1904951	22/3338	38/12653	3.93831e-05	0.000246901	0.000132428	Rab11/Abl/tral/Tom7/Klp64D/AdipoR/Vps35/CG6454/Sar1/Rab35/Flo2/S/RhoGAP92B/wls/Ttd14/Crag/Rab1/mop/Hrs/Nup154/RanBPM/rempA
GO:BP	negative regulation of hippo signaling	GO:0035331	24/3338	43/12653	4.04231e-05	0.000252882	0.000135636	mnb/Usp7/Cul1/Patronin/Herc4/Sik3/p38b/Prosap/par-1/slmb/Pp2A-29B/Akt/Su(dx)/SkpA/Ack/aPKC/Sik2/Mekk1/CkIalpha/wap/POSH/Mnat9/jub/Strip
GO:BP	cellular ion homeostasis	GO:0006873	52/3338	120/12653	4.05578e-05	0.000253184	0.000135798	VhaAC45/Cbp53E/Rbcn-3A/IscU/CG1090/CG10470/Atpalpha/EMRE/Nckx30C/CG42542/Nhe2/nrv3/Scox/SPoCk/Raf/ABCB7/SERCA/Ctr1A/VhaAC39-1/Zip99C/CG6523/AGBE/ZnT49B/PMCA/emei/Fer1HCH/Stim/SelG/Syx5/MICU3/Nhe1/Vha68-1/CG10362/CG17593/Nhe3/Vha100-1/ClC-c/Irp-1B/MICU1/RyR/Itpr/Zip71B/CG11367/Ae2/GPHR/Catsup/anne/sesB/ZnT77C/zyd/Cisd2/scaf6
GO:BP	epithelium migration	GO:0090132	73/3338	183/12653	4.15906e-05	0.00025908	0.000138961	sli/Ras85D/CASK/baz/dally/bnl/Vav/zip/shi/Rab11/spoon/ena/aop/dop/cindr/Raf/nudE/Sdc/Stat92E/Stam/drk/par-1/slmb/Dhc64C/Socs36E/Akt/Rho1/hep/sfl/Dsor1/chico/Vang/veli/kel/Cortactin/Ptpmeg2/dome/Cbl/Pi3K92E/csw/Sec5/Sin3A/Rab5/sqh/dsh/puc/kis/brn/Rab7/bsk/cpb/cnk/Hrs/jar/hop/Abi/Rac1/psidin/CG42674/twf/Catsup/Rme-8/Sec6/awd/robo2/mys/InR/Sec15/Vhl/Pu/AdamTS-A/Sec8/kay
GO:BP	imaginal disc morphogenesis	GO:0007560	149/3338	426/12653	4.19591e-05	0.00026027	0.000139599	Ras85D/Actbeta/hth/flw/Gclc/dally/cic/zip/Hs6st/pnut/Lpin/fz2/lgs/alphaSnap/RhoGAP19D/Mnn1/anchor/sno/svr/ct/unk/Nedd4/Raf/fzr/EloB/arm/Cip4/p38b/slpr/sds22/sgg/Dad/hyd/mam/stan/Stat92E/Axn/drk/Past1/Drak/Pcyt1/par-1/Dd/l(3)psg2/Grasp65/fry/peng/RhoGAP68F/Hs3st-B/KLHL18/cv/msk/rl/Socs36E/Stim/Cul3/fbl/Rho1/hep/sfl/Pkn/ebi/osa/ATP6AP2/Dg/Mad/EloA/nord/Rab30/Vang/S/Asx/RhoGAP92B/Su(dx)/dome/CycC/al…
GO:BP	post-embryonic animal organ morphogenesis	GO:0048563	149/3338	426/12653	4.19591e-05	0.00026027	0.000139599	Ras85D/Actbeta/hth/flw/Gclc/dally/cic/zip/Hs6st/pnut/Lpin/fz2/lgs/alphaSnap/RhoGAP19D/Mnn1/anchor/sno/svr/ct/unk/Nedd4/Raf/fzr/EloB/arm/Cip4/p38b/slpr/sds22/sgg/Dad/hyd/mam/stan/Stat92E/Axn/drk/Past1/Drak/Pcyt1/par-1/Dd/l(3)psg2/Grasp65/fry/peng/RhoGAP68F/Hs3st-B/KLHL18/cv/msk/rl/Socs36E/Stim/Cul3/fbl/Rho1/hep/sfl/Pkn/ebi/osa/ATP6AP2/Dg/Mad/EloA/nord/Rab30/Vang/S/Asx/RhoGAP92B/Su(dx)/dome/CycC/al…
GO:BP	cellular response to organonitrogen compound	GO:0071417	55/3338	129/12653	4.28071e-05	0.00026497	0.00014212	Cul1/5-HT7/Lpin/sima/Usp47/Ns3/GlyP/Mkrn1/Sik3/Rheb/Crtc/sgg/S6k/drk/Lamtor1/5-HT2A/Glo1/slmb/raptor/Sirt1/rl/Lamtor3/wrd/Ptp61F/Pp2A-29B/Akt/Dsor1/chico/Fmr1/Pi3K92E/Cdc37/SkpA/HDAC4/RagA-B/step/STUB1/5-HT2B/srl/CG32638/Pdk1/Sik2/Roc1a/Rab10/cnk/nclb/Tor/Pten/Pi3K21B/InR/Gbeta5/RagC-D/Lamtor4/Thor/Ide/PRAS40
GO:BP	nucleoside phosphate biosynthetic process	GO:1901293	56/3338	132/12653	4.33614e-05	0.000267836	0.000143657	Ac3/Cmpk/Acsl/AMPdeam/blw/AdSS/ATPsyngamma/ATPsynbeta/Pdhb/Scox/ATPsynF/Nmnat/Ak1/ATPsynD/CLS/Pdha/Adk2/ATPsynCF6/sun/Papss/bur/fbl/Gycbeta100B/CG31183/muc/ATPCL/Nadsyn/CG11035/CG33156/Ac76E/Dhod/DIP2/Gyc89Da/dnk/ras/ATPsyndelta/CG2246/Ak2/Dpck/Gycalpha99B/Ack/Naprt/ATPsynbetaL/Ac13E/ATPsynE/ATPsynO/ATPsynG/ATPsynC/CTPsyn/r/CG2846/RnrS/awd/CG3337/sesB/Ts
GO:BP	negative regulation of stress-activated protein kinase signaling cascade	GO:0070303	19/3338	31/12653	4.46194e-05	0.000275028	0.000147514	HUWE1/flw/Sac1/Mnn1/Usp5/raw/sgg/Ptp61F/ebi/alph/fmt/Urm1/SkpA/puc/cpb/Mnat9/Strip/cpa/JMJD6
GO:BP	regulation of protein phosphorylation	GO:0001932	46/3338	103/12653	4.49596e-05	0.000275965	0.000148017	Dap160/Actbeta/bnl/Ccm3/shi/SNF4Agamma/CG9098/svr/dco/Lk6/p38b/CG14408/Wee1/Hexim/sgg/Dad/Mob2/Axn/par-1/Atg17/fry/raptor/CG30291/Rho1/Ssrp/CG40191/CycY/pcs/Cbl/Pi3K92E/ASPP/mats/CG10376/step/Mat1/Mekk1/Cdk7/Tor/Abi/Rac1/Atg13/Pten/CG7044/sty/Cdc42/PRAS40
GO:BP	regulation of secretion	GO:0051046	46/3338	103/12653	4.49596e-05	0.000275965	0.000148017	Frq1/CASK/Frq2/Syt4/Sec24CD/dco/Septin4/Ih/SrpRalpha/BicD/hob/NFAT/Fur2/AdipoR/Fam92/Vps35/Rab3/Akt/Sec23/Flo2/S/RhoGAP92B/Rab3-GAP/Dys/wls/Rab3GAP1/PICK1/Tango1/cpx/Syt1/CG9650/Glut1/Cadps/Itpr/Mctp/CG15537/Rab1/Rab8/mop/Rph/Hrs/jar/InR/Septin1/Cdc42/SH3PX1
GO:BP	nucleotide metabolic process	GO:0009117	89/3338	233/12653	4.5079e-05	0.000276121	0.000148101	Gapdh1/Pfk/Ac3/Hex-A/Ald1/Pde11/Cmpk/Acsl/CG6330/PyK/Eno/AMPdeam/blw/AdSS/ATPsyngamma/Pgi/ATPsynbeta/Pdhb/Tpi/Hmgs/Scox/Gapdh2/Mdh1/ATPsynF/Aps/Sik3/ScsbetaG/Men/Nmnat/Ak1/ATPsynD/CLS/Pgk/Pdha/Adk2/ATPsynCF6/sun/Papss/cu/bur/fbl/Gpdh1/Gycbeta100B/CG31183/Pglym78/Vha68-1/muc/Dg/CG8080/ScsbetaA/ATPCL/Nadsyn/CG11035/Sarm/CG33156/Ac76E/Dhod/DIP2/Gyc89Da/dnk/ras/ATPsyndelta/CG2246/Ak2/Dpck/Gycalpha99B…
GO:BP	regulation of cell size	GO:0008361	47/3338	106/12653	4.66517e-05	0.000284018	0.000152337	Ras85D/CadN/pico/atl/RhoGAPp190/kcc/AMPKalpha/mbt/dop/Madm/Liprin-alpha/Rheb/p38b/S6k/stan/drk/Sema2a/raptor/MAPk-Ak2/RhoGAP1A/Cad96Ca/rl/Ythdf/Akt/chico/Fmr1/Vang/Sema1a/Wnt5/Pi3K92E/RasGAP1/CG10413/dsh/Pdk1/Sema1b/Alk/Mekk1/Tor/Rac1/Pten/Pi3K21B/InR/spas/Lamtor4/Thor/bif/icln
GO:BP	axonal transport of mitochondrion	GO:0019896	9/3338	10/12653	4.68524e-05	0.000284018	0.000152337	Marf/Khc/milt/Dhc64C/Arp10/Arp1/Aplip1/DCTN1-p150/Miro
GO:BP	regulation of nurse cell apoptotic process	GO:0045477	9/3338	10/12653	4.68524e-05	0.000284018	0.000152337	E2f1/Atg1/Dp/Bruce/slmb/spin/Nup154/Atg13/Pi3K59F
GO:BP	regulation of viral process	GO:0050792	9/3338	10/12653	4.68524e-05	0.000284018	0.000152337	TER94/Cbp20/AGO2/Sec61alpha/Ars2/Sar1/betaCOP/Rab1/Cbp80
GO:BP	regulation of viral life cycle	GO:1903900	9/3338	10/12653	4.68524e-05	0.000284018	0.000152337	TER94/Cbp20/AGO2/Sec61alpha/Ars2/Sar1/betaCOP/Rab1/Cbp80
GO:BP	lipid biosynthetic process	GO:0008610	100/3338	268/12653	4.73306e-05	0.000285736	0.000153258	Acsl/Marf/elm/FASN1/Lpin/Pcyt2/SREBP/CG2201/Hydr2/frj/Hmgs/Taz/alpha4GT1/Ipp/woc/ND-ACP/Pect/C1GalTA/nes/fwd/SERCA/Ttc7/bbc/PIG-T/Sccpdh1/Pcyt1/CLS/Npc2a/Npc1a/Dd/CG9391/Hydr1/SCAP/GAA1/CG7990/lace/Fatp1/Socs36E/PIG-G/schlank/ghi/Sc2/PIG-L/Dpm3/Hyccin/ATPCL/eIF4EHP/adp/PIG-F/CG42233/Socs16D/Mppe/Pdss2/PGAP5/Pi3K92E/GlcAT-S/CG2765/CG12170/ORMDL/iPLA2-VIA/Tango14/PGS1/Gnpat/Hmgcr/Agpat1/Fdx1/PIG-K/…
GO:BP	embryo development ending in birth or egg hatching	GO:0009792	78/3338	199/12653	4.73191e-05	0.000285736	0.000153258	Ras85D/Eip63E/Sac1/Vav/zip/Rab11/ena/aop/AGO2/Lkb1/kirre/raw/arm/Sec61alpha/slpr/Wee1/Abl/sgg/Nrx-IV/Bx42/Mcr/Smn/SelG/Rho1/hep/Arp3/Pkn/mmy/Cdc7/Rab30/yrt/Eb1/alph/Traf6/pum/Nmt/oc/Ddx1/Rab5/hid/step/Deaf1/Ggamma1/Ack/sns/sqh/dsh/lwr/puc/Sema1b/Trf/tkv/wal/bsk/jar/POSH/Rac1/ecd/scyl/Dab/chrb/sced/faf/alpha-Cat/FER/mys/ash1/l(3)mbt/InR/Mbs/Cdc42/sinu/barr/Jra/Mtl/cv-c/kay/cora
GO:BP	regulation of cell migration	GO:0030334	41/3338	89/12653	4.80238e-05	0.000288733	0.000154865	sli/Evi5/ths/bnl/zip/sima/ena/aop/fra/Stam/Sema2a/par-1/slmb/LRR/Akt/Rho1/hep/chico/Sema1a/Cbl/Pi3K92E/Sin3A/sqh/puc/kis/Rab1/Sema1b/bsk/Hrs/PlexB/Rac1/Pten/Catsup/Rme-8/robo2/Arl1/mys/Rap2l/InR/Pu/kay
GO:BP	regulation of dendrite development	GO:0050773	27/3338	51/12653	4.80183e-05	0.000288733	0.000154865	Hasp/CadN/Dlic/Nedd4/nudC/GM130/nudE/Rop/fra/G9a/fry/Akt/Sec23/Ret/Sar1/Fmr1/tutl/Pi3K92E/trc/vvl/Rab1/TBPH/Rac1/Pten/lva/spas/cv-c
GO:BP	positive regulation of protein kinase activity	GO:0045860	15/3338	22/12653	4.83673e-05	0.000290204	0.000155654	Dap160/Ccm3/Axn/Atg17/fry/raptor/Rho1/Pi3K92E/ASPP/step/Mat1/Abi/Rac1/Atg13/Cdc42
GO:BP	oocyte differentiation	GO:0009994	74/3338	187/12653	5.06148e-05	0.000303069	0.000162555	Ras85D/loco/slmo/baz/capu/orb/TER94/flw/cic/Khc/14-3-3zeta/lost/Rab11/tud/enc/drosha/milt/IKKepsilon/capt/DCTN2-p50/chb/Lkb1/Sxl/bai/nudE/Rop/BicD/Atx2/hts/stau/par-1/slmb/lsn/DCP2/Pat1/fry/Smn/msps/Dhc64C/Tm1/alpha-Spec/Ge-1/Dg/MESR4/Fmr1/CG7483/CSN5/spn-A/spn-F/Sec5/Moe/btz/Syt1/sqh/Rab6/aPKC/mago/muskelin/aub/Nup154/mon2/Sry-delta/tsu/papi/CkIIalpha/wek/jagn/asun/Syp/sll/mus301/cpa/jvl/TBCB
GO:BP	negative regulation of developmental growth	GO:0048640	42/3338	92/12653	5.07884e-05	0.000303489	0.00016278	plum/nwk/TSG101/cic/Syx7/RASSF8/ena/dbo/stj/Cip4/Abl/sgg/Dad/lig/Mob2/Fak/Nf1/RtGEF/Sema2a/Tao/dj-1beta/raptor/Ythdf/Akt/Liprin-gamma/Fmr1/Fsn/Ac76E/Src64B/Sema1a/Rae1/SkpA/Sema1b/Patr-1/TBPH/Pten/hiw/spas/Syp/Strip/Ide/bif
GO:BP	Rab protein signal transduction	GO:0032482	25/3338	46/12653	5.1225e-05	0.000304856	0.000163513	CG18659/Rab11/RabX4/Rab3/RabX1/Rab4/Rab18/Rab35/Rab30/Gapvd1/CG6607/Rab3GAP1/pns/Rab5/Crag/Sbf/Rab39/Rab6/Rab1/Rab8/Rab7/Rab10/Rab21/Rab3-GEF/ca
GO:BP	positive regulation of synapse assembly	GO:0051965	25/3338	46/12653	5.1225e-05	0.000304856	0.000163513	mnb/Octbeta2R/Nedd4/Pak3/Rheb/Sdc/Arp2/caz/stau/RhoGAP68F/Smn/Arp3/wit/Mad/simj/RhoGAP92B/Synd/Pi3K92E/nmo/Arfip/tkv/cpb/Tor/spas/Sec8
GO:BP	negative regulation of multicellular organismal process	GO:0051241	70/3338	175/12653	5.34589e-05	0.000316865	0.000169954	plum/nwk/tws/CadN/hdc/cic/Ctr9/RASSF8/ena/aop/lqf/dbo/stj/Cip4/Abl/sgg/Dad/Mob2/Fak/Doa/Nf1/RtGEF/Sema2a/Tao/slmb/trsn/raptor/Hs3st-B/Socs36E/Ythdf/Akt/MAGE/osa/Liprin-gamma/Mad/Fmr1/Fsn/Ac76E/alph/Src64B/Sema1a/Rae1/Pi3K92E/RasGAP1/CG9636/Sin3A/cdi/mor/SkpA/CG15537/Sema1b/tkv/Patr-1/TBPH/Pten/hiw/sty/brm/Spn/Ntan1/Bap60/Fbxl4/Pi3K21B/brat/InR/spas/sd/Syp/Strip/bif
GO:BP	regulation of mRNA metabolic process	GO:1903311	70/3338	175/12653	5.34589e-05	0.000316865	0.000169954	mbl/CG8565/CG6999/Pop2/Pabp2/Hrb87F/bsf/Rga/Srpk79D/Not1/HnRNP-K/x16/Sxl/CG4119/CG14641/CG11360/snf/snRNP-U1-70K/Doa/Srp54/qkr58E-1/snRNP-U1-C/U2af38/DCP2/qkr58E-2/CG2124/twin/PAN2/swm/Prp39/CG13850/Ythdf/SRPK/SF1/Ge-1/Fmr1/SF2/Cpsf6/Psi/CG2926/pum/roq/hfp/Not3/Dbp45A/Pep/ps/Tnpo-SR/ZC3H3/CG10418/aub/Saf-B/Patr-1/Hrb98DE/pea/qkr54B/Spx/fand/Suv3/Mettl3/smg/PAN3/Rrp42/Sf3a1/fl(2)d/pps/Prp19/mbf1/C…
GO:BP	carbohydrate metabolic process	GO:0005975	101/3338	272/12653	5.43715e-05	0.000321625	0.000172507	Gapdh1/Pfk/CG13937/Hex-A/Ald1/Actbeta/CG7766/PyK/Atg1/NUCB1/GCS2alpha/Mgat2/Eno/CG8613/FASN1/Synj/Pgi/l(1)G0196/Tpi/Gapdh2/Pgant2/Ipp/GlyP/UGP/Sik3/Atg3/GlyS/alpha-Man-Ib/Pgant5/Gabat/sgg/CD98hc/PhKgamma/Gbs-76A/Axn/AGBE/CG9391/GCS1/crc/Pgk/Atg17/Treh/5PtaseI/Gpdh1/sfl/Edem1/Pglym78/Dg/betaGlu/Ocrl/adp/Mpi/alpha-Man-IIa/kdn/ttv/Cbl/Gale/CG6805/GlcAT-S/CG11594/Gk2/CG8460/CG8475/Pgm2a/Pgant35A/alph…
GO:BP	histone modification	GO:0016570	54/3338	127/12653	5.473e-05	0.000323094	0.000173295	DMAP1/Ctr9/Set1/Dpy-30L1/Hmt4-20/atms/msl-2/hyd/Bre1/Wdr82/MBD-R2/G9a/escl/wcy/Ubc6/Sirt1/Taf10b/nej/Rcd1/ebi/l(3)73Ah/Spt20/Asx/CG14220/Gcn5/HDAC6/Ing5/Su(var)3-3/Sin3A/HDAC4/CG1620/hyx/HDAC11/ear/Utx/Su(z)2/CG16779/Spt3/CG5466/enok/CoRest/dgt1/ash2/CG17440/ash1/wds/msl-3/MTA1-like/Sce/MrgBP/msl-1/e(y)2/CG9246/Ndf
GO:BP	embryonic morphogenesis	GO:0048598	95/3338	253/12653	5.48824e-05	0.000323344	0.000173429	sli/Ras85D/baz/ths/Sac1/Vav/zip/Rab11/ct/CG41099/ena/aop/trh/Lkb1/Raf/raw/arm/Sec61alpha/jeb/slpr/kuk/Abl/Dad/Nrx-IV/PhKgamma/mam/5-HT2A/wol/RhoGAP68F/Mcr/SelG/kkv/Ptp61F/Rho1/hep/sfl/Pkn/Prosalpha6/Mad/Rab35/mmy/Rab30/yrt/S/sage/alph/Traf6/pum/ric8a/Nmt/Rab5/hid/step/Ggamma1/Ack/sqh/dsh/lwr/puc/aPKC/gol/tkv/wal/bsk/jar/nst/smog/Drp1/POSH/hop/Patj/Rac1/ecd/scyl/vkg/Dab/fand/chrb/alpha-Cat/btd/FER…
GO:BP	negative regulation of programmed cell death	GO:0043069	56/3338	133/12653	5.5881e-05	0.000326125	0.000174921	Ras85D/Cul1/CG2918/futsch/Tango9/Nf-YB/alpha4GT1/dco/Raf/Usp5/RYBP/zda/dmt/Bruce/CG9922/Pink1/Ubr3/pix/DUBAI/slmb/CG4238/Drep1/Met/Ubc6/Prx3/msk/Aatf/wrd/Akt/MAGE/ebi/Apc/gce/Naa20A/CG17019/Diap2/syd/SkpA/Ack/porin/puc/vito/qless/Pdk1/GlcT/Det/Naam/TBPH/Tor/psidin/Galphaq/sesB/Psn/CG15547/rpr/JMJD6
GO:BP	regulation of secretion by cell	GO:1903530	44/3338	98/12653	5.58445e-05	0.000326125	0.000174921	Frq1/CASK/Frq2/Syt4/Sec24CD/dco/Septin4/Ih/SrpRalpha/BicD/hob/NFAT/AdipoR/Fam92/Vps35/Rab3/Akt/Sec23/Flo2/S/RhoGAP92B/Rab3-GAP/Dys/wls/Rab3GAP1/PICK1/cpx/Syt1/CG9650/Glut1/Cadps/Itpr/Mctp/CG15537/Rab1/Rab8/mop/Rph/Hrs/jar/InR/Septin1/Cdc42/SH3PX1
GO:BP	positive regulation of intracellular transport	GO:0032388	18/3338	29/12653	5.59103e-05	0.000326125	0.000174921	DCTN2-p50/Abl/tral/Tom7/Klp64D/swm/PGAP1/CG6454/Sar1/Moe/Ttd14/BORCS5/Rab7/ScpX/Nup154/RanBPM/rempA/Nup358
GO:BP	negative regulation of JNK cascade	GO:0046329	18/3338	29/12653	5.59103e-05	0.000326125	0.000174921	HUWE1/flw/Sac1/Mnn1/Usp5/raw/sgg/Ptp61F/ebi/alph/fmt/Urm1/SkpA/cpb/Mnat9/Strip/cpa/JMJD6
GO:BP	protein deacetylation	GO:0006476	14/3338	20/12653	5.58351e-05	0.000326125	0.000174921	Sirt4/Sirt1/Sirt2/ebi/CG14220/HDAC6/Sin3A/HDAC4/CG1620/HDAC11/CG16779/CoRest/msl-3/MTA1-like
GO:BP	regulation of phosphorylation	GO:0042325	58/3338	139/12653	5.65741e-05	0.000329342	0.000176646	l(3)80Fj/Dap160/Actbeta/bnl/Ccm3/shi/SNF4Agamma/CG9098/svr/dco/Lk6/p38b/CG14408/Wee1/Hexim/sgg/Dad/Mob2/Axn/Eph/par-1/Atg17/fry/raptor/Cad96Ca/CG30291/Rho1/Ret/Ssrp/CG40191/Dg/CycY/Atg14/pcs/Cbl/Pi3K92E/ASPP/mats/CG10376/step/Mat1/Ankle2/Alk/Mekk1/Cdk7/Tor/Abi/Rac1/Atg13/Pten/CG7044/sty/Pi3K21B/InR/dnt/Cdc42/Drl-2/PRAS40
GO:BP	positive regulation of apoptotic process	GO:0043065	28/3338	54/12653	5.71843e-05	0.000331578	0.000177846	E2f1/Atg1/TER94/pnut/Cp1/Dp/sigmar/rdx/Lkb1/Der-1/Clbn/Den1/Tspo/lncRNA:Hsromega/Drak/CG9231/SCCRO3/26-29-p/HtrA2/CG32202/PDCD-5/Cbl/hid/morgue/Atg13/Pten/Septin1/Pi3K59F
GO:BP	axon extension	GO:0048675	28/3338	54/12653	5.71843e-05	0.000331578	0.000177846	CadN/Atg1/atl/SCAR/fz2/CadN2/Liprin-alpha/stan/Sema2a/Frl/Ythdf/hep/Fmr1/Vang/DAAM/Sema1a/Wnt5/Rab5/dsh/Sema1b/bsk/DCTN1-p150/Abi/Rac1/spas/Cdc42/Strip/bif
GO:BP	ribosome biogenesis	GO:0042254	86/3338	225/12653	5.84918e-05	0.000338491	0.000181554	CG6999/CG4866/drosha/mRpL20/Ns3/Nopp140/mRpS11/Rheb/CG1789/CG32706/CG11563/CG11030/P32/pix/emb/Nmd3/CG2260/CG6724/CG32262/dbe/Rrp47/CG11123/CG10286/Ran/Non3/CG1463/CG7488/Mtr4/CG14805/CG33158/LTV1/CG12608/Pop5/mRpS7/Trmt112/CG7637/Snp/CG4364/Nop60B/RpL35A/CG32409/CG7275/CG32708/Nsun5/Sas10/Dbp45A/CG6833/CG10903/CG11417/NHP2/Pop4/Rexo5/CG3817/RpS5b/nclb/Tor/l(1)G0020/CG6769/CG15916/mRpL36/kz/pit/C…
GO:BP	establishment of protein localization to extracellular region	GO:0035592	39/3338	84/12653	5.87443e-05	0.000339283	0.000181978	tbc/Sec24CD/Use1/Tango9/Tango5/Tpst/Bet3/garz/Madm/deltaCOP/SrpRalpha/gammaCOP/Doa/gry/AdipoR/CG5021/Fam92/Vps35/Rab3/Syx5/Tango11/Sar1/Flo2/S/RhoGAP92B/Ehbp1/wls/Tango6/PICK1/Tango14/Tango10/Crag/Tango1/puc/Rab1/Rab8/Rab10/mop/Hrs
GO:BP	gland development	GO:0048732	76/3338	194/12653	6.00389e-05	0.000346079	0.000185623	sli/Ras85D/E2f1/exd/hth/HUWE1/Marf/ths/hdc/zip/shi/fz2/MED24/drosha/drpr/trh/sigmar/Idh3b/garz/Raf/deltaCOP/raw/jeb/dmt/fra/Stat92E/gammaCOP/Tnpo/l(3)psg2/Atg17/rl/Syx5/Rho1/DCAF12/Mdh2/Mad/CSN5/sage/Src64B/Wnt5/Pi3K92E/Gale/hid/dsh/lwr/Itpr/GlyRS/Eip74EF/mew/tkv/caps/Utx/kto/CTPsyn/Drp1/hop/Tor/Zif/Rac1/ecd/Pten/sty/robo2/bel/Arl1/mys/InR/dnt/AdamTS-A/Drl-2/Dif/Scr/rpr/Mtl/Nup98-96/prod
GO:BP	tissue migration	GO:0090130	75/3338	191/12653	6.11326e-05	0.000351692	0.000188634	sli/Ras85D/CASK/baz/dally/bnl/Vav/zip/shi/Rab11/spoon/ena/aop/dop/cindr/Raf/jeb/nudE/Sdc/Stat92E/Stam/drk/par-1/wol/slmb/Dhc64C/Socs36E/Akt/Rho1/hep/sfl/Dsor1/chico/Vang/veli/kel/Cortactin/Ptpmeg2/dome/Cbl/Pi3K92E/csw/Sec5/Sin3A/Rab5/sqh/dsh/puc/kis/brn/Rab7/bsk/cpb/cnk/Hrs/jar/hop/Abi/Rac1/psidin/CG42674/twf/Catsup/Rme-8/Sec6/awd/robo2/mys/InR/Sec15/Vhl/Pu/AdamTS-A/Sec8/kay
GO:BP	positive regulation of cell development	GO:0010720	40/3338	87/12653	6.24394e-05	0.000357807	0.000191914	Dap160/Actbeta/Cul1/atl/ari-1/mbt/Mkrn1/sif/nudC/Rheb/GM130/nudE/stan/G9a/slmb/Dhc64C/Sec23/Sar1/Fmr1/Vang/Sec71/Wnt5/Pi3K92E/spn-F/oc/Cdc37/dsh/aPKC/Rab1/Roc1a/bsk/DCTN1-p150/PlexB/Rac1/trol/Sox14/lva/InR/spas/zld
GO:BP	regulation of kinase activity	GO:0043549	40/3338	87/12653	6.24394e-05	0.000357807	0.000191914	l(3)80Fj/Dap160/Ccm3/SNF4Agamma/CG14408/Wee1/Hexim/sgg/Axn/Eph/Atg17/fry/raptor/Cad96Ca/CG30291/Rho1/Ret/CG40191/CycY/Atg14/pcs/Cbl/Pi3K92E/ASPP/CG10376/step/Mat1/Alk/Cdk7/Abi/Rac1/Atg13/Pten/sty/Pi3K21B/InR/dnt/Cdc42/Drl-2/PRAS40
GO:BP	maintenance of cell polarity	GO:0030011	13/3338	18/12653	6.25697e-05	0.000357855	0.00019194	alc/tws/TSG101/Sec24CD/Lkb1/Exo84/Rho1/Sec23/p130CAS/veli/aPKC/trol/Cdc42
GO:BP	protein deubiquitination	GO:0016579	26/3338	49/12653	6.28029e-05	0.00035849	0.00019228	Usp7/Usp2/Usp47/CG7332/Usp5/not/scny/puf/CG7222/Duba/DUBAI/Uch/Usp30/Usp32/Usp15-31/CG8209/CG4968/Usp14/Asx/CG2224/Uch-L5/Rpn11/Usp1/Usp10/faf/e(y)2
GO:BP	response to abiotic stimulus	GO:0009628	157/3338	456/12653	6.63739e-05	0.000378138	0.000202819	slgA/Hsp67Ba/Nmdar1/mnb/Syn/loco/E2f1/Trap1/shep/CG2918/CG6330/Sdhaf3/Atpalpha/zip/Arl8/MagR/lap/nocte/kcc/14-3-3zeta/Mnn1/Tpi/sima/spoon/nrv3/Hrb87F/CG5446/dco/Tsp42Ej/DCTN2-p50/hang/rdgB/UGP/Su(var)205/Ulp1/CG11779/Dyrk2/stj/CG33129/p38b/slpr/dmt/Ih/Fkbp59/Rop/Stat92E/Hsp60A/Parp/VhaAC39-1/nonA/emb/Camta/cdm/Droj2/Nf1/Pdfr/Hsc70Cb/Sema2a/CG9231/NFAT/sxc/Clic/Tom40/MAPk-Ak2/CG17059/cu/Tm1/ktub/P…
GO:BP	positive regulation of transferase activity	GO:0051347	29/3338	57/12653	6.66242e-05	0.000378829	0.000203189	l(3)80Fj/Dap160/Ccm3/SCCRO/fzr/SCCRO4/Axn/Eph/Atg17/fry/raptor/SCCRO3/Cad96Ca/Rho1/Ret/Atg14/Pi3K92E/ASPP/step/Mat1/Alk/Abi/Rac1/Atg13/InR/dnt/Cdc42/Drl-2/mtSSB
GO:BP	protein quality control for misfolded or incompletely synthesized proteins	GO:0006515	12/3338	16/12653	6.72212e-05	0.000380747	0.000204218	TER94/rdx/Der-1/sordd1/Ufd1/sordd2/Cul3/Lon/STUB1/Uggt/ClpP/CG5199
GO:BP	protein export from nucleus	GO:0006611	12/3338	16/12653	6.72212e-05	0.000380747	0.000204218	Abl/Clbn/emb/Ran/Ranbp16/RanBP3/Ranbp21/Hph/RanBPM/Vhl/ebo/mbo
GO:BP	compound eye photoreceptor cell differentiation	GO:0001751	80/3338	207/12653	6.73927e-05	0.000380983	0.000204345	mbl/Ras85D/Actbeta/hth/CadN/SP2353/14-3-3zeta/Nf-YB/rin/Rab11/hbs/Usp47/aop/mbt/capt/CadN2/Raf/Usp5/Liprin-alpha/jeb/Mob2/stan/Atx2/Doa/drk/Past1/Tao/vimar/Fur2/fry/spg/noc/Kr-h1/GAA1/msk/rl/Amph/Socs36E/Syn2/nej/Ire1/Dsor1/Mad/Vps4/tutl/S/CSN5/Synd/Su(dx)/mask/alph/Src64B/Cbl/csw/dysc/RasGAP1/oc/Moe/cdi/AP-1sigma/Afti/dsh/Rab6/PIG-S/tkv/Alk/cnk/DCTN1-p150/hop/sv/Rac1/Pten/Dab/Sec6/sty/p47/Mbs/EM…
GO:BP	protein depolymerization	GO:0051261	22/3338	39/12653	6.79172e-05	0.000381742	0.000204751	atl/tmod/futsch/Patronin/Usp5/beta-Spec/EndoA/LRR/CG31715/alpha-Spec/Apc/Klp10A/cpb/tacc/psidin/twf/Svil/Mnat9/Vhl/spas/Gel/cpa
GO:BP	negative regulation of cytoskeleton organization	GO:0051494	22/3338	39/12653	6.79172e-05	0.000381742	0.000204751	Kank/tmod/Patronin/spoon/Cip4/beta-Spec/Efa6/LRR/RhoGAP68F/CG31715/alpha-Spec/Apc/RhoGAP92B/cpb/tacc/twf/Svil/Mnat9/Vhl/spas/Gel/cpa
GO:BP	ubiquitin-dependent protein catabolic process via the multivesicular body sorting pathway	GO:0043162	11/3338	14/12653	6.78055e-05	0.000381742	0.000204751	ALiX/shrb/Stam/lsn/Vps28/Vps37B/Vps20/Vps4/mop/Vsp37A/CG10435
GO:BP	response to starvation	GO:0042594	64/3338	158/12653	7.05923e-05	0.000396019	0.000212409	l(3)80Fj/Ras85D/loco/Atg1/Lpin/SNF4Agamma/rin/Hrb87F/AMPKalpha/Aps/Sik3/Atg3/Raf/GlyS/zda/Rheb/p38b/Crtc/Bruce/EndoA/car/Axn/Sirt4/crc/Atg17/trsn/rudhira/raptor/Kr-h1/REPTOR-BP/Vps16A/rl/Ire1/chico/Atg14/CG7536/Ac76E/CG12384/DopEcR/Pi3K92E/spin/Syx17/hid/HDAC4/RagA-B/Itpr/Sik2/mthl8/Atg9/Jafrac1/Pten/cyc/CG10483/Mitf/Hr96/Atg8a/Wdr59/InR/RagC-D/Pi3K59F/Thor/Tmem18/Atg18a/Mesh1
GO:BP	protein targeting to membrane	GO:0006612	27/3338	52/12653	7.49217e-05	0.000419505	0.000225006	Trp1/CG2918/GABPI/boca/Sgt/CG1598/Sec61beta/Srp19/Sec61alpha/SrpRalpha/CG8860/CG6454/Pex19/CG1407/Vps37B/Srp14/Srp9/Srp68/Srp72/Dnz1/Srp54k/Sec63/Vsp37A/Pex3/CG5885/CG5447/cora
GO:BP	positive regulation of protein phosphorylation	GO:0001934	25/3338	47/12653	8.21583e-05	0.000458275	0.000245801	Dap160/Actbeta/bnl/Ccm3/CG9098/Lk6/p38b/Mob2/Axn/Atg17/fry/raptor/Rho1/Pi3K92E/ASPP/mats/step/Mat1/Mekk1/Tor/Abi/Rac1/Atg13/CG7044/Cdc42
GO:BP	positive regulation of cell junction assembly	GO:1901890	25/3338	47/12653	8.21583e-05	0.000458275	0.000245801	mnb/Octbeta2R/Nedd4/Pak3/Rheb/Sdc/Arp2/caz/stau/RhoGAP68F/Smn/Arp3/wit/Mad/simj/RhoGAP92B/Synd/Pi3K92E/nmo/Arfip/tkv/cpb/Tor/spas/Sec8
GO:BP	cytokinesis	GO:0000910	48/3338	111/12653	8.40495e-05	0.000467934	0.000250982	Septin2/ALiX/flw/shrb/zip/pnut/shi/alphaSnap/Rab11/cindr/Septin4/Asap/fwd/Bruce/Graf/hyd/gammaCOP/sau/Lam/brun/Exo84/Syx5/fbl/ghi/Rho1/Pkn/Rab35/Ocrl/vib/Synd/fws/sqh/Act5C/Cp110/Rab1/AP-2alpha/Cog7/Det/CG30183/alphaCOP/Act88F/l(2)gd1/Zw10/Septin1/Act87E/Sec8/cv-c/Act57B
GO:BP	protein localization to extracellular region	GO:0071692	40/3338	88/12653	8.55951e-05	0.000475536	0.000255059	tbc/dally/Sec24CD/Use1/Tango9/Tango5/Tpst/Bet3/garz/Madm/deltaCOP/SrpRalpha/gammaCOP/Doa/gry/AdipoR/CG5021/Fam92/Vps35/Rab3/Syx5/Tango11/Sar1/Flo2/S/RhoGAP92B/Ehbp1/wls/Tango6/PICK1/Tango14/Tango10/Crag/Tango1/puc/Rab1/Rab8/Rab10/mop/Hrs
GO:BP	lipid storage	GO:0019915	31/3338	63/12653	8.5739e-05	0.000475536	0.000255059	Ubc2/Acsl/elm/blw/FASN1/SREBP/SNF4Agamma/Uba1/AMPKalpha/zetaCOP/CG5946/deltaCOP/SERCA/gammaCOP/Grasp65/Akt/adp/betaCOP/Su(dx)/Pi3K92E/Invadolysin/Itpr/puml/apolpp/Atf3/Pten/Cds/alphaCOP/Pi3K21B/InR/ca
GO:BP	positive regulation of synaptic assembly at neuromuscular junction	GO:0045887	23/3338	42/12653	8.70659e-05	0.000481325	0.000258164	mnb/Octbeta2R/Rheb/Sdc/Arp2/caz/stau/RhoGAP68F/Smn/Arp3/wit/Mad/simj/RhoGAP92B/Synd/Pi3K92E/nmo/Arfip/tkv/cpb/Tor/spas/Sec8
GO:BP	fibroblast growth factor receptor signaling pathway	GO:0008543	21/3338	37/12653	8.79311e-05	0.000481325	0.000258164	Ras85D/ths/dally/bnl/Ptp10D/aop/Raf/Ptp4E/gro/drk/sxc/vap/rl/sfl/Dsor1/Src64B/csw/cnk/nst/trol/sty
GO:BP	cellular response to fibroblast growth factor stimulus	GO:0044344	21/3338	37/12653	8.79311e-05	0.000481325	0.000258164	Ras85D/ths/dally/bnl/Ptp10D/aop/Raf/Ptp4E/gro/drk/sxc/vap/rl/sfl/Dsor1/Src64B/csw/cnk/nst/trol/sty
GO:BP	positive regulation of protein transport	GO:0051222	21/3338	37/12653	8.79311e-05	0.000481325	0.000258164	Rab11/Abl/tral/Tom7/Klp64D/AdipoR/Vps35/CG6454/Sar1/Flo2/S/RhoGAP92B/wls/Ttd14/Crag/Rab1/mop/Hrs/Nup154/RanBPM/rempA
GO:BP	response to fibroblast growth factor	GO:0071774	21/3338	37/12653	8.79311e-05	0.000481325	0.000258164	Ras85D/ths/dally/bnl/Ptp10D/aop/Raf/Ptp4E/gro/drk/sxc/vap/rl/sfl/Dsor1/Src64B/csw/cnk/nst/trol/sty
GO:BP	terminal button organization	GO:0072553	21/3338	37/12653	8.79311e-05	0.000481325	0.000258164	Syn/CASK/Atg1/Vap33/p38b/Nrx-IV/ND-20/S6k/Arp2/Nlg2/Smn/Arp3/Nrx-1/Fmr1/Aplip1/TBPH/Tor/hiw/spas/Thor/Nup75
GO:BP	regulation of protein modification by small protein conjugation or removal	GO:1903320	21/3338	37/12653	8.79311e-05	0.000481325	0.000258164	Cul1/SCCRO/dod/fzr/SCCRO4/hyd/bchs/car/Ndfip/SCCRO3/CG17059/CG8209/Diap2/STUB1/Cand1/krz/CG4911/Atg8a/rpr/Rca1/CSN8
GO:BP	regulation of reproductive process	GO:2000241	52/3338	123/12653	8.93147e-05	0.000487988	0.000261738	Drip/E2f1/Cul1/Atg1/TER94/zip/Khc/Rab11/enc/Dp/aop/Mkrn1/CG11700/Bruce/Rop/Doa/stau/par-1/slmb/Akt/hep/chico/endos/Cbl/twe/Pi3K92E/spn-F/spin/SkpA/Syt1/sqh/puc/kis/mago/aub/bsk/Adi1/Hrs/Nup154/Tor/Rac1/Atg13/Catsup/Rme-8/tsu/elgi/InR/asun/Pi3K59F/Ide/Rca1/kay
GO:BP	regulation of cell motility	GO:2000145	41/3338	91/12653	8.97187e-05	0.000489284	0.000262433	sli/Evi5/ths/bnl/zip/sima/ena/aop/fra/Stam/Sema2a/par-1/slmb/LRR/Akt/Rho1/hep/chico/Sema1a/Cbl/Pi3K92E/Sin3A/sqh/puc/kis/Rab1/Sema1b/bsk/Hrs/PlexB/Rac1/Pten/Catsup/Rme-8/robo2/Arl1/mys/Rap2l/InR/Pu/kay
GO:BP	nucleotide biosynthetic process	GO:0009165	54/3338	129/12653	9.0699e-05	0.000493712	0.000264808	Ac3/Cmpk/Acsl/AMPdeam/blw/AdSS/ATPsyngamma/ATPsynbeta/Pdhb/Scox/ATPsynF/Nmnat/ATPsynD/CLS/Pdha/Adk2/ATPsynCF6/sun/Papss/bur/fbl/Gycbeta100B/CG31183/muc/ATPCL/Nadsyn/CG11035/CG33156/Ac76E/Dhod/DIP2/Gyc89Da/ras/ATPsyndelta/CG2246/Ak2/Dpck/Gycalpha99B/Ack/Naprt/ATPsynbetaL/Ac13E/ATPsynE/ATPsynO/ATPsynG/ATPsynC/CTPsyn/r/CG2846/RnrS/awd/CG3337/sesB/Ts
GO:BP	cytoskeleton-dependent cytokinesis	GO:0061640	44/3338	100/12653	0.000100233	0.000544598	0.000292102	Septin2/ALiX/flw/shrb/zip/pnut/shi/alphaSnap/Rab11/Septin4/Asap/fwd/Graf/hyd/gammaCOP/sau/Lam/brun/Exo84/Syx5/ghi/Rho1/Pkn/Rab35/Ocrl/vib/Synd/fws/sqh/Act5C/Rab1/AP-2alpha/Cog7/Det/CG30183/alphaCOP/Act88F/l(2)gd1/Zw10/Septin1/Act87E/Sec8/cv-c/Act57B
GO:BP	actomyosin structure organization	GO:0031032	45/3338	103/12653	0.000103106	0.000559172	0.000299918	Msp300/flw/SCAR/tmod/zip/shi/Rab11/Nedd4/SelR/fwd/Graf/Actn/hts/sau/gek/Lam/brun/C3G/RhoGAP68F/Smn/CanB2/CG5022/Exo84/Tm1/ghi/Rho1/Dg/Ocrl/yrt/vib/DAAM/mask/Src64B/fws/step/Cog7/Det/spdi/Abi/CG30183/Act88F/Bsg/mys/Sec8/cora
GO:BP	imaginal disc-derived wing morphogenesis	GO:0007476	110/3338	305/12653	0.000104366	0.000563925	0.000302468	Ras85D/Actbeta/hth/flw/Gclc/dally/cic/zip/Hs6st/pnut/Lpin/fz2/lgs/alphaSnap/anchor/sno/svr/ct/unk/Nedd4/Raf/EloB/arm/Cip4/p38b/sgg/Dad/mam/stan/Axn/drk/Past1/Drak/Pcyt1/par-1/Dd/Grasp65/fry/peng/Hs3st-B/cv/msk/rl/Socs36E/Stim/Cul3/fbl/Rho1/sfl/ebi/osa/ATP6AP2/Dg/Mad/EloA/nord/Vang/S/Asx/Su(dx)/Dys/Cbl/wls/cos/RasGAP1/Su(var)3-3/sbb/mor/trc/Lpt/nmo/Pal1/bs/step/LIMK1/hyx/sqh/dsh/kis/Chd1/wmd/mew/t…
GO:BP	regulation of chromosome organization	GO:0033044	33/3338	69/12653	0.00010434	0.000563925	0.000302468	tws/Usp7/Cul1/wde/Cdc27/Su(var)205/Ulp1/ZAP3/cal1/sgg/Stat92E/slmb/Dhc64C/bur/CG31687/Mad1/Invadolysin/Su(var)3-3/Moe/SkpA/CG15237/pds5/hop/Mi-2/Bub1/Bap60/CoRest/Zw10/Cenp-C/ida/Tnks/cv-c/ncd
GO:BP	heterophilic cell-cell adhesion via plasma membrane cell adhesion molecules	GO:0007157	18/3338	30/12653	0.000105364	0.000564121	0.000302573	beat-IIa/beat-Ib/beat-IIb/beat-Ic/hbs/beat-VI/Fas3/beat-Vc/kirre/beat-IIIb/Nrt/beat-Va/beat-Ia/glec/sns/mew/mys/beat-Vb
GO:BP	negative regulation of autophagy	GO:0010507	18/3338	30/12653	0.000105364	0.000564121	0.000302573	Ras85D/CG5026/Sec61beta/Raf/scny/Sec61alpha/Rheb/Bruce/wcy/rl/mask/CG12384/Pi3K92E/Rab39/Tor/sesB/InR/Rubicon
GO:BP	negative regulation of stress-activated MAPK cascade	GO:0032873	18/3338	30/12653	0.000105364	0.000564121	0.000302573	HUWE1/flw/Sac1/Mnn1/Usp5/raw/sgg/Ptp61F/ebi/alph/fmt/Urm1/SkpA/cpb/Mnat9/Strip/cpa/JMJD6
GO:BP	ATP synthesis coupled proton transport	GO:0015986	15/3338	23/12653	0.000105102	0.000564121	0.000302573	blw/ATPsyngamma/ATPsynbeta/ATPsynF/ATPsynD/ATPsynCF6/sun/CG11035/ATPsyndelta/ATPsynbetaL/ATPsynE/ATPsynO/ATPsynG/ATPsynC/CG3337
GO:BP	membrane biogenesis	GO:0044091	15/3338	23/12653	0.000105102	0.000564121	0.000302573	Nlg4/Lpin/Nrx-IV/Nlg2/Dd/Lam/GAA1/Amph/Nrx-1/Synd/Moe/PIG-S/Sec6/Nlg3/p47
GO:BP	eye photoreceptor cell development	GO:0042462	46/3338	106/12653	0.000105664	0.000564698	0.000302882	mbl/CadN/SP2353/Rab11/mbt/capt/CadN2/Raf/Liprin-alpha/jeb/Mob2/stan/Atx2/Doa/vimar/fry/Kr-h1/GAA1/msk/Amph/Syn2/Ire1/Vps4/yrt/tutl/Synd/Su(dx)/csw/dysc/oc/Moe/AP-1sigma/Afti/tinc/Rab6/PIG-S/Alk/DCTN1-p150/Rac1/Pten/Dab/Sec6/sty/p47/Mbs/EMC3
GO:BP	positive regulation of kinase activity	GO:0033674	24/3338	45/12653	0.000107505	0.000572447	0.000307039	l(3)80Fj/Dap160/Ccm3/Axn/Eph/Atg17/fry/raptor/Cad96Ca/Rho1/Ret/Atg14/Pi3K92E/ASPP/step/Mat1/Alk/Abi/Rac1/Atg13/InR/dnt/Cdc42/Drl-2
GO:BP	exocytic process	GO:0140029	24/3338	45/12653	0.000107505	0.000572447	0.000307039	CASK/comt/gammaSnap1/alphaSnap/Syx13/Nsf2/Vps45/Vap33/Rop/gammaSnap2/nSyb/Rab3/Exo84/Syx6/Sec10/Sec5/Syx17/Syx8/Rab8/Sec6/stac/Sec15/Snap25/Sec8
GO:BP	regulation of RNA splicing	GO:0043484	47/3338	109/12653	0.000107914	0.000573589	0.000307651	mbl/sm/CG6999/Hrb87F/HnRNP-K/x16/Sxl/CG4119/CG14641/CG11360/snf/snRNP-U1-70K/Parp/Doa/Srp54/qkr58E-1/snRNP-U1-C/U2af38/qkr58E-2/Prp39/SF1/Ire1/barc/SF2/Cpsf6/Psi/CG2926/hfp/Dbp45A/Pep/ps/Tnpo-SR/CG10418/Saf-B/Hrb98DE/TBPH/pea/qkr54B/Spx/fand/Mettl3/Pcf11/Sf3a1/fl(2)d/pps/Prp19/CG5728
GO:BP	dendrite morphogenesis	GO:0048813	65/3338	163/12653	0.000108161	0.00057386	0.000307797	sli/CadN/TER94/Dlic/shrb/dally/futsch/Khc/prel/AMPKalpha/ct/ena/jim/Nedd4/Ulp1/nudC/Nak/Abl/GM130/nudE/S6k/stan/fra/G9a/TrpRS/Sema2a/E(Pc)/meigo/fry/Dhc64C/Cul3/Tm1/Rho1/Sec23/wit/Sar1/Fmr1/pho/tutl/Sema1a/Wnt5/Pi3K92E/pum/SMC1/trc/Rab5/hid/vvl/robl/GlyRS/Rab1/Tor/Rac1/Sox14/Ptp69D/brm/pira/lva/ash2/sqz/spas/Cdc42/path/cv-c/kay
GO:BP	axis specification	GO:0009798	83/3338	219/12653	0.000109537	0.000580112	0.00031115	Ras85D/loco/baz/capu/orb/TER94/flw/cic/zip/Khc/14-3-3zeta/rin/lost/Rab11/spoon/tud/enc/Dp/milt/IKKepsilon/capt/Mkrn1/DCTN2-p50/Raf/bai/Rop/lig/BicD/Parp/stau/par-1/slmb/lsn/DCP2/Pat1/msps/rl/Dhc64C/Tm1/Pc/Ge-1/Dsor1/Dg/Rab35/Fmr1/pho/Pcl/CG7483/Asx/CSN5/spn-A/Cbl/pum/csw/spn-F/RasGAP1/oc/Moe/btz/wkd/Syt1/sqh/Rab6/aPKC/mago/aub/cnk/mon2/Sry-delta/sty/tsu/papi/faf/CkIIalpha/wek/asun/Syp/sll/Sce/mus…
GO:BP	cellular response to starvation	GO:0009267	39/3338	86/12653	0.000111102	0.000587338	0.000315026	l(3)80Fj/Ras85D/Atg1/Lpin/SNF4Agamma/AMPKalpha/Atg3/Raf/GlyS/Bruce/EndoA/car/Sirt4/Atg17/raptor/Vps16A/rl/Ire1/chico/Atg14/CG7536/CG12384/DopEcR/Pi3K92E/spin/Syx17/hid/HDAC4/RagA-B/Itpr/Atg9/CG10483/Mitf/Atg8a/Wdr59/InR/RagC-D/Pi3K59F/Atg18a
GO:BP	regulation of protein kinase activity	GO:0045859	30/3338	61/12653	0.000112372	0.000592983	0.000318053	Dap160/Ccm3/SNF4Agamma/CG14408/Wee1/Hexim/sgg/Axn/Atg17/fry/raptor/CG30291/Rho1/CG40191/CycY/pcs/Cbl/Pi3K92E/ASPP/CG10376/step/Mat1/Cdk7/Abi/Rac1/Atg13/Pten/sty/Cdc42/PRAS40
GO:BP	regulation of lipid metabolic process	GO:0019216	27/3338	53/12653	0.00011459	0.000603606	0.000323751	elm/Lpin/SREBP/Sik3/Lkb1/Dd/SCAP/Akt/schlank/chico/Atg14/eIF4EHP/adp/CG42233/CG2765/iPLA2-VIA/STUB1/Fdx1/Pex3/CG3589/PIP5K59B/Cds/Pdp1/bwa/spas/Fdx2/CG13601
GO:BP	response to nutrient levels	GO:0031667	71/3338	182/12653	0.000120374	0.000632935	0.000339482	l(3)80Fj/CG9674/Ras85D/loco/Atg1/CG17691/shi/Lpin/SNF4Agamma/rin/Hrb87F/AMPKalpha/Aps/Sik3/Atg3/Raf/GlyS/zda/Rheb/p38b/Crtc/Ih/Bruce/EndoA/car/Axn/Sirt4/crc/Atg17/trsn/rudhira/raptor/Kr-h1/REPTOR-BP/Vps16A/rl/Ire1/chico/Atg14/CG7536/endos/Ac76E/CG12384/DopEcR/Pi3K92E/spin/Syx17/hid/HDAC4/RagA-B/Ggamma1/Itpr/Sik2/mthl8/Atg9/Jafrac1/Tor/Pten/cyc/CG10483/Mitf/Hr96/Atg8a/Wdr59/InR/RagC-D/Pi3K59F/Thor…
GO:BP	locomotor rhythm	GO:0045475	35/3338	75/12653	0.000121664	0.000638575	0.000342507	Ac3/kairos/Kdm5/dco/dod/Mid1/Ih/sgg/Pink1/tara/unc80/Atx2/Nf1/Pdfr/slmb/sxc/na/Cul3/cu/fbl/nej/Rho1/jet/Fmr1/unc79/dome/dysc/Dh44/hop/Rac1/cyc/CkIIalpha/Mbs/tyf/kay
GO:BP	vesicle budding from membrane	GO:0006900	14/3338	21/12653	0.000126763	0.000664146	0.000356222	shrb/Sec24CD/shi/lap/ArfGAP3/sau/Sec24AB/Sec23/Sar1/Vps20/Fmr1/Sec13/CG17765/Vps24
GO:BP	neutral lipid metabolic process	GO:0006638	25/3338	48/12653	0.000128757	0.000671001	0.000359899	FASN1/Lpin/Xbp1/Hydr2/CG1309/CG15111/Sik3/Lkb1/CG17646/Dd/crc/inaE/Akt/schlank/Gpdh1/Ire1/chico/Hsl/Gk2/CG31140/Cds/ACC/rdgA/CG1271/Thor
GO:BP	acylglycerol metabolic process	GO:0006639	25/3338	48/12653	0.000128757	0.000671001	0.000359899	FASN1/Lpin/Xbp1/Hydr2/CG1309/CG15111/Sik3/Lkb1/CG17646/Dd/crc/inaE/Akt/schlank/Gpdh1/Ire1/chico/Hsl/Gk2/CG31140/Cds/ACC/rdgA/CG1271/Thor
GO:BP	establishment or maintenance of cytoskeleton polarity	GO:0030952	25/3338	48/12653	0.000128757	0.000671001	0.000359899	baz/Khc/14-3-3zeta/Rab11/capt/DCTN2-p50/chb/Lkb1/nudE/Kap3/BicD/par-1/Klp64D/msps/Rho1/Apc/Eb1/spn-F/Klp68D/btz/Ggamma1/Rab6/mago/smog/jvl
GO:BP	central nervous system development	GO:0007417	108/3338	300/12653	0.000130393	0.000678323	0.000363826	LpR2/loco/E2f1/exd/LpR1/Actbeta/hth/CG6083/nolo/robo3/siz/RhoGAPp190/Vav/Ctr9/Rbp9/Uba1/Ptp10D/ct/drosha/mbt/C1GalTA/Ulp1/raw/Abl/Nrx-IV/Ptp4E/mam/stan/bchs/cib/Nrt/Eph/Tao/vap/Dmtn/Lam/Frl/spg/noc/Smn/cnn/Dhc64C/Pc/wit/alpha-Spec/PsGEF/Dg/Mad/mmy/Fmr1/Apc/Pcl/CG11035/PrBP/Hr3/Cont/DAAM/mask/Src64B/Trc8/Invadolysin/csw/oc/spin/HSPC300/lov/pasi1/SMC1/vvl/Rcc1/kune/robl/Itpr/bsk/mop/fdl/SoxN/CG4853…
GO:BP	positive regulation of cell death	GO:0010942	44/3338	101/12653	0.000132742	0.000689318	0.000369724	E2f1/Atg1/TER94/pnut/Cp1/MED24/ben/Dp/sigmar/Idh3b/rdx/Lkb1/Der-1/Sec61alpha/Rheb/Clbn/Den1/Tspo/Atx2/lncRNA:Hsromega/Drak/CG9231/l(3)psg2/SCCRO3/26-29-p/HtrA2/hep/CG32202/Mdh2/Fmr1/PDCD-5/Traf6/Cbl/hid/morgue/Utx/bsk/kto/Atg13/Pten/bel/Septin1/Pi3K59F/rpr
GO:BP	positive regulation of neuron projection development	GO:0010976	17/3338	28/12653	0.000133698	0.000693056	0.000371729	atl/AMPKalpha/Rheb/Rop/S6k/stan/raptor/Akt/mmy/Vang/Wnt5/dsh/TBPH/Tor/Rac1/twf/spas
GO:BP	negative regulation of cell death	GO:0060548	63/3338	158/12653	0.000137419	0.000709839	0.00038073	Ras85D/HUWE1/Cul1/CG2918/futsch/Tango9/Nf-YB/alpha4GT1/dco/aux/Raf/Usp5/RYBP/zda/dmt/Bruce/CG9922/Pink1/Ubr3/pix/DUBAI/slmb/vimar/CG4238/dj-1beta/Drep1/Met/Ubc6/Prx3/msk/Aatf/wrd/Akt/MAGE/ebi/Apc/gce/Naa20A/CG17019/Diap2/syd/SkpA/Ack/porin/Fer2/puc/vito/qless/Pdk1/GlcT/Det/Naam/TBPH/POSH/Drep2/Tor/psidin/Galphaq/sesB/Psn/CG15547/rpr/JMJD6
GO:BP	centrosome cycle	GO:0007098	37/3338	81/12653	0.000137199	0.000709839	0.00038073	tws/Wdr62/gammaTub23C/Khc/Prosbeta5/Patronin/Map205/chb/ens/Wee1/nudE/hts/emb/CCT6/slmb/CG32425/Prosbeta7/Ubc6/cnn/msps/Dhc64C/Pp2A-29B/Rcd1/CG17493/spd-2/Plp/Grip84/Invadolysin/Klp10A/SkpA/mgr/Cp110/DCTN1-p150/Vhl/Rcd4/Sas-6/ncd
GO:BP	ribose phosphate biosynthetic process	GO:0046390	47/3338	110/12653	0.00014077	0.000724597	0.000388646	Ac3/Cmpk/Acsl/AMPdeam/blw/AdSS/ATPsyngamma/ATPsynbeta/Pdhb/Scox/ATPsynF/ATPsynD/CLS/Pdha/Adk2/ATPsynCF6/sun/Papss/bur/fbl/Gycbeta100B/CG31183/muc/ATPCL/CG11035/Ac76E/Dhod/DIP2/Gyc89Da/ras/ATPsyndelta/CG2246/Ak2/Dpck/Gycalpha99B/Ack/ATPsynbetaL/ATPsynE/ATPsynO/ATPsynG/ATPsynC/CTPsyn/r/CG2846/awd/CG3337/sesB
GO:BP	positive regulation of supramolecular fiber organization	GO:1902905	23/3338	43/12653	0.000140705	0.000724597	0.000388646	nwk/SCAR/shi/svr/dco/chb/Nedd4/p38b/Naus/Lam/LRR/cnn/msps/hep/Ssrp/Cortactin/Vrp1/DAAM/Abi/mv/Mnat9/spas/Nup98-96
GO:BP	inorganic ion homeostasis	GO:0098771	50/3338	119/12653	0.000145408	0.000747156	0.000400746	Cbp53E/Nmdar1/IscU/CG1090/CG10470/CG14757/Atpalpha/EMRE/kcc/Nckx30C/CG42542/nrv3/Scox/SPoCk/mfrn/ABCB7/SERCA/Ctr1A/VhaAC39-1/Zip99C/CG6523/Pdfr/AGBE/ZnT49B/PMCA/Mvl/emei/Fer1HCH/Grx1/Stim/SelG/Syx5/MICU3/CG10362/CG17593/Irp-1B/CG10413/MICU1/RyR/Itpr/Zip71B/CG11367/Catsup/anne/sesB/ZnT77C/zyd/Cisd2/Atox1/scaf6
GO:BP	border follicle cell migration	GO:0007298	55/3338	134/12653	0.000146805	0.000750912	0.00040276	Ras85D/CASK/baz/Vav/zip/shi/Rab11/spoon/ena/aop/dop/cindr/Raf/nudE/Stat92E/par-1/slmb/Dhc64C/Socs36E/Akt/Rho1/hep/Dsor1/chico/Vang/veli/Cortactin/Ptpmeg2/dome/Cbl/Pi3K92E/Sec5/Rab5/sqh/dsh/puc/kis/brn/Rab7/bsk/cpb/Hrs/jar/hop/Rac1/psidin/twf/Catsup/Rme-8/Sec6/mys/InR/Sec15/Sec8/kay
GO:BP	morphogenesis of embryonic epithelium	GO:0016331	52/3338	125/12653	0.000146828	0.000750912	0.00040276	Ras85D/Sac1/Vav/zip/Rab11/ena/aop/Lkb1/raw/arm/Sec61alpha/slpr/kuk/Abl/Nrx-IV/Mcr/kkv/Rho1/hep/Pkn/mmy/Rab30/yrt/alph/Traf6/Nmt/Rab5/step/Ggamma1/Ack/dsh/lwr/puc/aPKC/tkv/bsk/jar/POSH/Patj/Rac1/Dab/alpha-Cat/FER/mys/Mbs/Cdc42/sinu/Jra/Mtl/cv-c/kay/cora
GO:BP	retrograde transport, endosome to Golgi	GO:0042147	19/3338	33/12653	0.000146907	0.000750912	0.00040276	CG2747/Vps29/Vps53/Snx3/Vps26/Vps35/Syx6/CG4074/Arl5/Snx6/SIDL/CG32576/Vps52/cert/Rab6/Vps50/mop/CG1116/Snx1
GO:BP	protein N-linked glycosylation	GO:0006487	21/3338	38/12653	0.000147902	0.000754687	0.000404785	FucT6/Mgat2/Dad1/Alg11/Ost48/sff/CG33303/CG33774/Mgat4a/GalT1/Stt3A/wol/GCS1/crc/meigo/Ostgamma/CG3149/Uggt/Alg12/kud/Alg13
GO:BP	regulation of axonogenesis	GO:0050770	26/3338	51/12653	0.000150385	0.000762052	0.000408735	HUWE1/atl/RhoGAPp190/fz2/sif/Pak3/stan/fra/Sema2a/Ythdf/Rho1/Fmr1/Vang/DAAM/Sema1a/Wnt5/LIMK1/dsh/Sema1b/DCTN1-p150/Trim9/PlexB/Rac1/spas/Cdc42/bif
GO:BP	endoplasmic reticulum unfolded protein response	GO:0030968	13/3338	19/12653	0.000150154	0.000762052	0.000408735	Xbp1/Der-2/Der-1/Herp/crc/Ire1/Edem1/sip3/CG32276/CG6766/PEK/Atf6/Edem2
GO:BP	Arp2/3 complex-mediated actin nucleation	GO:0034314	13/3338	19/12653	0.000150154	0.000762052	0.000408735	Arpc3A/nwk/SCAR/Arp2/Naus/LRR/Arpc5/Arpc2/Arp3/Cortactin/PICK1/Arfip/Arpc4
GO:BP	germ-line cyst encapsulation	GO:0048138	13/3338	19/12653	0.000150154	0.000762052	0.000408735	CSN7/Cip4/alien/slmb/CSN6/CSN5/Src64B/Cul2/Mettl3/CSN3/CSN1b/Sce/Scm
GO:BP	positive regulation of phosphorylation	GO:0042327	34/3338	73/12653	0.000158678	0.000802693	0.000430533	l(3)80Fj/Dap160/Actbeta/bnl/Ccm3/CG9098/Lk6/p38b/Mob2/Axn/Eph/Atg17/fry/raptor/Cad96Ca/Rho1/Ret/Atg14/Pi3K92E/ASPP/mats/step/Mat1/Alk/Mekk1/Tor/Abi/Rac1/Atg13/CG7044/InR/dnt/Cdc42/Drl-2
GO:BP	cytokinetic process	GO:0032506	24/3338	46/12653	0.000168901	0.000848552	0.00045513	flw/shi/Rab11/Asap/fwd/Graf/sau/Lam/brun/Exo84/ghi/Rho1/Pkn/Ocrl/vib/Synd/fws/AP-2alpha/Cog7/Det/CG30183/Zw10/Sec8/cv-c
GO:BP	positive regulation of cytoskeleton organization	GO:0051495	24/3338	46/12653	0.000168901	0.000848552	0.00045513	nwk/SCAR/Vav/shi/svr/dco/chb/Nedd4/p38b/Naus/Lam/LRR/cnn/msps/hep/Ssrp/Cortactin/Vrp1/DAAM/Abi/mv/Mnat9/spas/Nup98-96
GO:BP	negative regulation of protein-containing complex assembly	GO:0031333	16/3338	26/12653	0.000168845	0.000848552	0.00045513	Kank/tmod/spoon/Cip4/Dad/Efa6/LRR/CG31715/RhoGAP92B/cpb/twf/Svil/4E-T/Gel/Thor/cpa
GO:BP	actin nucleation	GO:0045010	16/3338	26/12653	0.000168845	0.000848552	0.00045513	Arpc3A/nwk/capu/SCAR/Cip4/Arp2/Naus/LRR/Arpc5/Arpc2/Arp3/Cortactin/PICK1/Arfip/Arpc4/Strump
GO:BP	lipid localization	GO:0010876	62/3338	156/12653	0.000172275	0.000864024	0.000463429	LpR2/Ubc2/slmo/Acsl/scramb1/elm/blw/FASN1/SREBP/SNF4Agamma/CG31729/Uba1/prel/CG1902/AMPKalpha/zetaCOP/dco/ATP8A/rdgB/CG5946/deltaCOP/Eato/Abcd3/SERCA/gammaCOP/Npc2a/Npc1a/Grasp65/CG3149/Akt/CG33298/Nrx-1/CG30392/adp/vib/betaCOP/Su(dx)/sPLA2/Pi3K92E/Invadolysin/lilli/CDC50/cert/Abca3/Itpr/CG13893/CG32485/puml/ScpX/apolpp/Atf3/Pten/Cds/alphaCOP/scramb2/Pi3K21B/CG30109/InR/ca/cv-d/GramD1B/Start1
GO:BP	cotranslational protein targeting to membrane	GO:0006613	12/3338	17/12653	0.000173476	0.000865612	0.000464281	Sec61beta/Srp19/Sec61alpha/SrpRalpha/CG8860/Srp14/Srp9/Srp68/Srp72/Srp54k/Sec63/CG5885
GO:BP	SRP-dependent cotranslational protein targeting to membrane	GO:0006614	12/3338	17/12653	0.000173476	0.000865612	0.000464281	Sec61beta/Srp19/Sec61alpha/SrpRalpha/CG8860/Srp14/Srp9/Srp68/Srp72/Srp54k/Sec63/CG5885
GO:BP	vesicle targeting	GO:0006903	12/3338	17/12653	0.000173476	0.000865612	0.000464281	CASK/ArfGAP3/Exo84/Sec23/Sar1/Sec10/Sec5/CG17765/Sec6/Sec15/Sec8/Start1
GO:BP	programmed cell death involved in cell development	GO:0010623	44/3338	102/12653	0.000174496	0.000869223	0.000466218	Ras85D/E2f1/cathD/Atg1/TER94/hdc/shi/Uba1/MED24/Dp/drpr/Idh3b/arm/Bruce/Pink1/wun/slmb/l(3)psg2/Atg17/raptor/Drep1/HtrA2/DCAF12/Mdh2/Apc/S/spin/hid/morgue/aPKC/Itpr/Eip74EF/Utx/Atg9/kto/Nup154/Tor/Atg13/Galphaq/Atg8a/bel/Pi3K59F/Atg18a/rpr
GO:BP	response to extracellular stimulus	GO:0009991	71/3338	184/12653	0.00017801	0.000885225	0.0004748	l(3)80Fj/CG9674/Ras85D/loco/Atg1/CG17691/shi/Lpin/SNF4Agamma/rin/Hrb87F/AMPKalpha/Aps/Sik3/Atg3/Raf/GlyS/zda/Rheb/p38b/Crtc/Ih/Bruce/EndoA/car/Axn/Sirt4/crc/Atg17/trsn/rudhira/raptor/Kr-h1/REPTOR-BP/Vps16A/rl/Ire1/chico/Atg14/CG7536/endos/Ac76E/CG12384/DopEcR/Pi3K92E/spin/Syx17/hid/HDAC4/RagA-B/Ggamma1/Itpr/Sik2/mthl8/Atg9/Jafrac1/Tor/Pten/cyc/CG10483/Mitf/Hr96/Atg8a/Wdr59/InR/RagC-D/Pi3K59F/Thor…
GO:BP	regulation of hippo signaling	GO:0035330	36/3338	79/12653	0.000178349	0.000885405	0.000474897	mnb/Usp7/Cul1/14-3-3zeta/Patronin/dco/Herc4/Sik3/p38b/lig/pod1/RtGEF/Prosap/Tao/par-1/slmb/Leash/Pp2A-29B/Akt/alpha-Spec/Su(dx)/Src64B/Rae1/SkpA/Ack/aPKC/Sik2/Mekk1/CkIalpha/wap/POSH/Prp4k/elgi/Mnat9/jub/Strip
GO:BP	ribonucleotide biosynthetic process	GO:0009260	46/3338	108/12653	0.000180275	0.000893459	0.000479217	Ac3/Cmpk/Acsl/AMPdeam/blw/AdSS/ATPsyngamma/ATPsynbeta/Pdhb/Scox/ATPsynF/ATPsynD/CLS/Pdha/Adk2/ATPsynCF6/sun/Papss/bur/fbl/Gycbeta100B/CG31183/muc/ATPCL/CG11035/Ac76E/Dhod/DIP2/Gyc89Da/ras/ATPsyndelta/Ak2/Dpck/Gycalpha99B/Ack/ATPsynbetaL/ATPsynE/ATPsynO/ATPsynG/ATPsynC/CTPsyn/r/CG2846/awd/CG3337/sesB
GO:BP	glycogen metabolic process	GO:0005977	22/3338	41/12653	0.000184206	0.000905293	0.000485564	Actbeta/CG7766/Atg1/FASN1/GlyP/UGP/Atg3/GlyS/sgg/PhKgamma/Gbs-76A/Axn/AGBE/Atg17/CG8475/Pgm1/Atg9/Hr96/Pask/ACC/CG9485/Atg18a
GO:BP	cellular glucan metabolic process	GO:0006073	22/3338	41/12653	0.000184206	0.000905293	0.000485564	Actbeta/CG7766/Atg1/FASN1/GlyP/UGP/Atg3/GlyS/sgg/PhKgamma/Gbs-76A/Axn/AGBE/Atg17/CG8475/Pgm1/Atg9/Hr96/Pask/ACC/CG9485/Atg18a
GO:BP	energy reserve metabolic process	GO:0006112	22/3338	41/12653	0.000184206	0.000905293	0.000485564	Actbeta/CG7766/Atg1/FASN1/GlyP/UGP/Atg3/GlyS/sgg/PhKgamma/Gbs-76A/Axn/AGBE/Atg17/CG8475/Pgm1/Atg9/Hr96/Pask/ACC/CG9485/Atg18a
GO:BP	establishment or maintenance of microtubule cytoskeleton polarity	GO:0030951	22/3338	41/12653	0.000184206	0.000905293	0.000485564	baz/Khc/14-3-3zeta/Rab11/capt/DCTN2-p50/chb/Lkb1/nudE/Kap3/BicD/par-1/Klp64D/msps/Apc/Eb1/spn-F/Klp68D/btz/Rab6/mago/jvl
GO:BP	glucan metabolic process	GO:0044042	22/3338	41/12653	0.000184206	0.000905293	0.000485564	Actbeta/CG7766/Atg1/FASN1/GlyP/UGP/Atg3/GlyS/sgg/PhKgamma/Gbs-76A/Axn/AGBE/Atg17/CG8475/Pgm1/Atg9/Hr96/Pask/ACC/CG9485/Atg18a
GO:BP	spindle organization	GO:0007051	55/3338	135/12653	0.000184933	0.000907348	0.000486666	Wdr62/TER94/gammaTub23C/Patronin/DCTN2-p50/chb/Lkb1/fwd/Wee1/wac/nudE/sgg/hts/sau/Lam/brun/cnn/msps/DCTN6-p27/Ran/Exo84/Dhc64C/Pp2A-29B/SRPK/ghi/larp/vib/Eb1/Synd/spd-2/Grip84/fws/Invadolysin/Moe/Klp10A/sw/mgr/Ptpa/Grip163/mop/DCTN1-p150/Det/tacc/jar/Nup154/Tap42/Mnat9/Vhl/pelo/Aladin/Axs/Sec8/Tnks/cv-c/ncd
GO:BP	autophagy of mitochondrion	GO:0000422	18/3338	31/12653	0.000189472	0.000921909	0.000494476	SREBP/Sod2/Atg3/Pink1/ref(2)P/CG5676/Atg17/Ubc6/Atg18b/Hsc70-5/Atg14/CG11975/mask/Atg9/Atg13/Atg8a/Vps13D/Atg18a
GO:BP	torso signaling pathway	GO:0008293	18/3338	31/12653	0.000189472	0.000921909	0.000494476	Ras85D/cic/gcl/14-3-3zeta/Raf/gro/drk/vap/rl/Cul3/Dsor1/Src64B/csw/RasGAP1/cnk/Hrs/krz/sty
GO:BP	actomyosin contractile ring organization	GO:0044837	18/3338	31/12653	0.000189472	0.000921909	0.000494476	flw/shi/Rab11/fwd/Graf/sau/Lam/brun/Exo84/ghi/Rho1/Ocrl/vib/fws/Cog7/Det/CG30183/Sec8
GO:BP	mitochondrion disassembly	GO:0061726	18/3338	31/12653	0.000189472	0.000921909	0.000494476	SREBP/Sod2/Atg3/Pink1/ref(2)P/CG5676/Atg17/Ubc6/Atg18b/Hsc70-5/Atg14/CG11975/mask/Atg9/Atg13/Atg8a/Vps13D/Atg18a
GO:BP	positive regulation of plasma membrane bounded cell projection assembly	GO:0120034	18/3338	31/12653	0.000189472	0.000921909	0.000494476	pico/SCAR/ena/sif/Abl/hep/Arp3/PsGEF/Rab35/Flo2/DAAM/HSPC300/aPKC/Abi/Rac1/psidin/Cdc42/cpa
GO:BP	regulation of filopodium assembly	GO:0051489	20/3338	36/12653	0.000192701	0.000933009	0.00050043	baz/pico/SCAR/ena/sif/C1GalTA/Arp2/Rho1/hep/Arp3/Rab35/Flo2/DAAM/HSPC300/aPKC/cpb/Abi/Rac1/Cdc42/cpa
GO:BP	autophagosome organization	GO:1905037	20/3338	36/12653	0.000192701	0.000933009	0.00050043	Atg1/Synj/Atg3/EndoA/bchs/Atg17/Atg18b/EMC6/Atg14/CG11975/Rab1/Atg9/mv/Atg13/Aduk/Atg8a/p47/Pi3K59F/SH3PX1/Atg18a
GO:BP	actomyosin contractile ring contraction	GO:0000916	11/3338	15/12653	0.000193343	0.000933009	0.00050043	flw/Rab11/fwd/Graf/brun/Exo84/ghi/vib/fws/Cog7/Sec8
GO:BP	dorsal/ventral axis specification, ovarian follicular epithelium	GO:0008069	11/3338	15/12653	0.000193343	0.000933009	0.00050043	loco/orb/rin/spoon/Dp/Raf/lig/Parp/Cbl/csw/sty
GO:BP	contractile ring contraction	GO:0036213	11/3338	15/12653	0.000193343	0.000933009	0.00050043	flw/Rab11/fwd/Graf/brun/Exo84/ghi/vib/fws/Cog7/Sec8
GO:BP	hippo signaling	GO:0035329	38/3338	85/12653	0.00019514	0.000940133	0.000504251	mnb/Usp7/Cul1/14-3-3zeta/Patronin/dco/Herc4/Sik3/p38b/lig/pod1/RtGEF/Prosap/Tao/par-1/slmb/Leash/Pp2A-29B/Akt/alpha-Spec/Su(dx)/Src64B/Rae1/mats/SkpA/Ack/aPKC/Sik2/Mekk1/CkIalpha/wap/POSH/Prp4k/elgi/Mnat9/sd/jub/Strip
GO:BP	dorsal closure, amnioserosa morphology change	GO:0046664	9/3338	11/12653	0.000196814	0.000946644	0.000507743	Sac1/zip/Rab11/Rab5/Ack/tkv/Rac1/alpha-Cat/FER
GO:BP	chaeta development	GO:0022416	39/3338	88/12653	0.00020241	0.00097038	0.000520474	dally/Hs6st/Rab11/hbs/unk/IKKepsilon/capt/kirre/SelR/sgg/bchs/Atx2/fry/Hs3st-B/Stim/Arp3/ebi/nvy/Cul4/NAT1/da/CycC/spn-F/Diap2/trc/skd/hyx/sns/sn/kto/Abi/Amun/twf/holn1/CkIIalpha/Sec15/jagn/CtBP/Cdk8
GO:BP	RNA 3'-end processing	GO:0031123	39/3338	88/12653	0.00020241	0.00097038	0.000520474	orb/Pabp2/bsf/x16/su(f)/Srp54/Wdr33/Nbr/swm/hrg/Fmr1/Trf4-1/SF2/Snp/Cpsf6/omd/IntS9/Nop60B/CycC/IntS6/CG9018/CstF50/IntS1/hyx/ZC3H3/Rexo5/Cpsf73/Cpsf100/Suv3/Ski6/IntS2/Pcf11/CG16790/asun/IntS12/Rrp42/Rrp6/CG4266/Cdk8
GO:BP	regulation of apoptotic process involved in development	GO:1904748	10/3338	13/12653	0.000204024	0.00097652	0.000523767	E2f1/Atg1/Dp/Bruce/slmb/spin/hid/Nup154/Atg13/Pi3K59F
GO:BP	regulation of response to external stimulus	GO:0032101	103/3338	287/12653	0.000210797	0.0010073	0.000540275	sli/Cul1/atl/PPP4R2r/TM9SF2/DMAP1/bnl/SP2353/EMRE/sima/ben/Usp2/AMPKalpha/drpr/tub/GlyP/IKKepsilon/Herc4/rdgB/Hr78/Ulp1/scny/Rheb/puf/p38b/GstO2/hyd/S6k/wun/stan/Ntf-2/Stat92E/Parp/Doa/Camta/Sema2a/Npc2a/key/MED6/slmb/raptor/senju/ktub/Akt/Ubc4/Pli/hep/mmy/PDCD-5/Vang/Sarm/betaCOP/Etl1/flfl/Sema1a/Traf6/Wnt5/Nxt1/Diap2/Nsun5/CG13994/mor/SkpA/Crag/vvl/dsh/lwr/Su(var)2-10/puc/UbcE2M/Sema1b/aub/bsk/…
GO:BP	establishment or maintenance of epithelial cell apical/basal polarity	GO:0045197	15/3338	24/12653	0.000211943	0.00100948	0.000541447	baz/AMPKalpha/Exo84/Dhc64C/Rho1/Dg/Vps4/yrt/veli/Cont/Moe/aPKC/DCTN1-p150/trol/gkt
GO:BP	positive regulation of chromosome organization	GO:2001252	15/3338	24/12653	0.000211943	0.00100948	0.000541447	Usp7/Cul1/wde/Su(var)205/Ulp1/Stat92E/slmb/bur/Su(var)3-3/Moe/SkpA/hop/Bap60/CoRest/Tnks
GO:BP	regulation of mRNA splicing, via spliceosome	GO:0048024	41/3338	94/12653	0.000214701	0.00102096	0.000547605	mbl/CG6999/Hrb87F/HnRNP-K/x16/Sxl/CG4119/CG14641/CG11360/snf/snRNP-U1-70K/Doa/Srp54/qkr58E-1/snRNP-U1-C/U2af38/qkr58E-2/Prp39/SF1/SF2/Cpsf6/Psi/CG2926/hfp/Dbp45A/Pep/ps/Tnpo-SR/CG10418/Saf-B/Hrb98DE/pea/qkr54B/Spx/fand/Mettl3/Sf3a1/fl(2)d/pps/Prp19/CG5728
GO:BP	negative regulation of canonical Wnt signaling pathway	GO:0090090	23/3338	44/12653	0.000221664	0.00105067	0.000563537	HUWE1/Cul1/TER94/aop/sgg/gro/Axn/Duba/slmb/nej/Rho1/RanBP3/Apc/Bili/Sin3A/SkpA/nmo/Roc1a/CkIalpha/SoxN/nkd/Sulf1/CtBP
GO:BP	positive regulation of neuromuscular junction development	GO:1904398	23/3338	44/12653	0.000221664	0.00105067	0.000563537	mnb/Octbeta2R/Rheb/Sdc/Arp2/caz/stau/RhoGAP68F/Smn/Arp3/wit/Mad/simj/RhoGAP92B/Synd/Pi3K92E/nmo/Arfip/tkv/cpb/Tor/spas/Sec8
GO:BP	compound eye photoreceptor development	GO:0042051	44/3338	103/12653	0.000227737	0.00107771	0.000578042	mbl/CadN/SP2353/Rab11/mbt/capt/CadN2/Raf/Liprin-alpha/jeb/Mob2/stan/Atx2/Doa/vimar/fry/Kr-h1/GAA1/msk/Amph/Syn2/Ire1/Vps4/tutl/Synd/Su(dx)/csw/dysc/oc/Moe/AP-1sigma/Afti/Rab6/PIG-S/Alk/DCTN1-p150/Rac1/Pten/Dab/Sec6/sty/p47/Mbs/EMC3
GO:BP	asymmetric cell division	GO:0008356	45/3338	106/12653	0.000230736	0.00109014	0.000584711	loco/baz/tws/ALiX/CSN7/shrb/dally/enc/IKKepsilon/chb/Lkb1/Sxl/Nak/mam/orb2/Sara/alien/hts/clu/cnn/msps/twin/Dhc64C/chico/CSN5/flfl/Ehbp1/ric8a/hfp/mgr/Ggamma1/aPKC/AP-2alpha/NHP2/Tor/Zif/l(2)gd1/Pfdn2/CSN3/CSN1b/brat/InR/pelo/Cdc42/Arl2
GO:BP	regulation of protein transport	GO:0051223	30/3338	63/12653	0.00023367	0.00110223	0.000591194	Rab11/rdx/Abl/sgg/SrpRalpha/tral/Tom7/Klp64D/AdipoR/Fam92/Vps35/CG6454/Sar1/Flo2/Apc/S/RhoGAP92B/Gapvd1/wls/PICK1/Ttd14/Crag/Rab1/mop/Hrs/Nup154/RanBPM/Arl1/rempA/mbo
GO:BP	salivary gland development	GO:0007431	51/3338	124/12653	0.000236765	0.00111147	0.00059615	sli/exd/hth/HUWE1/hdc/zip/shi/fz2/MED24/drosha/drpr/trh/sigmar/Idh3b/garz/deltaCOP/raw/jeb/dmt/fra/gammaCOP/l(3)psg2/Atg17/Rho1/DCAF12/Mdh2/Mad/sage/Src64B/Wnt5/hid/dsh/Itpr/Eip74EF/mew/tkv/caps/Utx/kto/Rac1/robo2/bel/Arl1/mys/dnt/AdamTS-A/Drl-2/Dif/Scr/rpr/Mtl
GO:BP	exocrine system development	GO:0035272	51/3338	124/12653	0.000236765	0.00111147	0.00059615	sli/exd/hth/HUWE1/hdc/zip/shi/fz2/MED24/drosha/drpr/trh/sigmar/Idh3b/garz/deltaCOP/raw/jeb/dmt/fra/gammaCOP/l(3)psg2/Atg17/Rho1/DCAF12/Mdh2/Mad/sage/Src64B/Wnt5/hid/dsh/Itpr/Eip74EF/mew/tkv/caps/Utx/kto/Rac1/robo2/bel/Arl1/mys/dnt/AdamTS-A/Drl-2/Dif/Scr/rpr/Mtl
GO:BP	negative regulation of apoptotic process	GO:0043066	51/3338	124/12653	0.000236765	0.00111147	0.00059615	Ras85D/Cul1/CG2918/futsch/Tango9/Nf-YB/alpha4GT1/dco/Raf/Usp5/RYBP/zda/dmt/Bruce/CG9922/Pink1/Ubr3/pix/DUBAI/slmb/CG4238/Drep1/Ubc6/Prx3/msk/wrd/Akt/MAGE/ebi/Naa20A/CG17019/Diap2/syd/SkpA/Ack/porin/puc/vito/qless/Pdk1/GlcT/Det/Naam/TBPH/Tor/psidin/sesB/Psn/CG15547/rpr/JMJD6
GO:BP	regulation of protein ubiquitination	GO:0031396	17/3338	29/12653	0.000243897	0.00114312	0.000613126	Cul1/SCCRO/dod/fzr/SCCRO4/hyd/bchs/car/Ndfip/SCCRO3/CG8209/Diap2/STUB1/CG4911/Atg8a/rpr/Rca1
GO:BP	autophagosome assembly	GO:0000045	19/3338	34/12653	0.000250979	0.00117257	0.000628919	Atg1/Synj/Atg3/EndoA/bchs/Atg17/Atg18b/EMC6/Atg14/CG11975/Rab1/Atg9/Atg13/Aduk/Atg8a/p47/Pi3K59F/SH3PX1/Atg18a
GO:BP	regulation of dendrite morphogenesis	GO:0048814	19/3338	34/12653	0.000250979	0.00117257	0.000628919	CadN/Dlic/Nedd4/nudC/GM130/nudE/G9a/fry/Sec23/Sar1/Fmr1/tutl/trc/vvl/Rab1/Rac1/lva/spas/cv-c
GO:BP	regulation of establishment of protein localization	GO:0070201	31/3338	66/12653	0.000252417	0.00117741	0.000631517	Rab11/rdx/Abl/sgg/SrpRalpha/tral/Tom7/Klp64D/AdipoR/Fam92/Vps35/CG6454/Sar1/Rab35/Flo2/Apc/S/RhoGAP92B/Gapvd1/wls/PICK1/Ttd14/Crag/Rab1/mop/Hrs/Nup154/RanBPM/Arl1/rempA/mbo
GO:BP	ribose phosphate metabolic process	GO:0019693	72/3338	189/12653	0.000253198	0.00117918	0.000632467	Gapdh1/Pfk/Ac3/Hex-A/Ald1/Pde11/Cmpk/Acsl/PyK/Eno/AMPdeam/blw/AdSS/ATPsyngamma/Pgi/ATPsynbeta/Pdhb/Tpi/Hmgs/Scox/Gapdh2/ATPsynF/Aps/ScsbetaG/CG42813/Ak1/ATPsynD/CLS/Pgk/Pdha/Adk2/ATPsynCF6/sun/Papss/bur/fbl/Gycbeta100B/CG31183/Pglym78/Vha68-1/muc/Dg/ScsbetaA/ATPCL/CG11035/Ac76E/Dhod/DIP2/Gyc89Da/ras/ATPsyndelta/CG2246/Ak2/Dpck/Gycalpha99B/Ack/ATPsynbetaL/Hmgcr/ATPsynE/ATPsynO/ATPsynG/ATPsynC/Pmvk…
GO:BP	polysaccharide metabolic process	GO:0005976	24/3338	47/12653	0.000259414	0.00120431	0.000645943	Actbeta/CG7766/Atg1/FASN1/GlyP/UGP/Atg3/GlyS/sgg/PhKgamma/Gbs-76A/Axn/AGBE/Atg17/sfl/ttv/CG8475/Pgm1/Atg9/Hr96/Pask/ACC/CG9485/Atg18a
GO:BP	cellular polysaccharide metabolic process	GO:0044264	24/3338	47/12653	0.000259414	0.00120431	0.000645943	Actbeta/CG7766/Atg1/FASN1/GlyP/UGP/Atg3/GlyS/sgg/PhKgamma/Gbs-76A/Axn/AGBE/Atg17/sfl/ttv/CG8475/Pgm1/Atg9/Hr96/Pask/ACC/CG9485/Atg18a
GO:BP	establishment of protein localization to plasma membrane	GO:0061951	14/3338	22/12653	0.000263955	0.00122345	0.000656211	comt/Rab11/Nsf2/sau/Vps26/Vps35/Rab35/Arfrp1/Sec71/wls/Sec5/Crag/Sec6/CG5447
GO:BP	post-embryonic appendage morphogenesis	GO:0035120	122/3338	351/12653	0.000269842	0.00124876	0.000669788	Ras85D/Actbeta/hth/flw/Gclc/dally/cic/zip/Hs6st/pnut/Lpin/fz2/lgs/alphaSnap/RhoGAP19D/anchor/sno/svr/ct/unk/Nedd4/Raf/EloB/arm/Cip4/p38b/sgg/Dad/mam/stan/Axn/drk/Past1/Drak/Pcyt1/par-1/Dd/l(3)psg2/Grasp65/fry/peng/RhoGAP68F/Hs3st-B/cv/msk/rl/Socs36E/Stim/Cul3/fbl/Rho1/sfl/ebi/osa/ATP6AP2/Dg/Mad/EloA/nord/Vang/S/Asx/RhoGAP92B/Su(dx)/CycC/Dys/Cbl/wls/cos/RasGAP1/Su(var)3-3/sbb/mor/trc/Lpt/nmo/skd/P…
GO:BP	tube development	GO:0035295	91/3338	250/12653	0.000277317	0.00128133	0.000687258	sli/Rbcn-3A/Ras85D/Vha26/hth/baz/TSG101/Dlic/Sac1/hdc/bnl/zip/Sec24CD/fz2/hbs/Ptp10D/ct/trh/CCT3/garz/Raf/raw/Nsf2/arm/Rheb/dmt/Dad/Ptp4E/Stat92E/gammaCOP/VhaAC39-1/drk/Lam/noc/Smn/cnn/rl/Dhc64C/kkv/Rho1/Sec23/Sar1/Dsor1/Rab35/mmy/Fmr1/Gp93/S/Vha100-1/dome/da/Sec5/Moe/Hph/bs/wkd/VhaPPA1-1/Ggamma1/Hmgcr/sqh/Act5C/puc/aPKC/mew/tkv/Alk/caps/wal/bsk/cnk/DCTN1-p150/hop/Tor/Rac1/ecd/Uvrag/vkg/Cds/sty/f…
GO:BP	purine-containing compound metabolic process	GO:0072521	86/3338	234/12653	0.000279894	0.00129121	0.000692555	Gapdh1/Pfk/Ac3/Hex-A/Ald1/Pde11/Acsl/PyK/Eno/AMPdeam/blw/AdSS/ATPsyngamma/Pgi/ATPsynbeta/Pdhb/Tpi/Hmgs/Scox/Gapdh2/Mdh1/ATPsynF/Aps/Sik3/ScsbetaG/Men/Adk3/Nmnat/AhcyL1/Ak1/ATPsynD/CLS/Pgk/Pdha/Adk2/ATPsynCF6/sun/Papss/Nt5b/cu/bur/fbl/Gpdh1/Gycbeta100B/CG31183/Pglym78/Vha68-1/muc/Dg/CG33056/CG8080/ScsbetaA/ATPCL/Nadsyn/CG11035/Sarm/CG33156/Ac76E/DIP2/Gyc89Da/ras/ATPsyndelta/CG2246/Ak2/Dpck/Gycalph…
GO:BP	cellular chemical homeostasis	GO:0055082	55/3338	137/12653	0.000289174	0.00132984	0.000713275	VhaAC45/Cbp53E/Rbcn-3A/Hex-A/IscU/CG1090/CG10470/Atpalpha/FASN1/EMRE/Nckx30C/CG42542/Nhe2/nrv3/Scox/SPoCk/Raf/ABCB7/SERCA/Ctr1A/VhaAC39-1/Zip99C/CG6523/AGBE/ZnT49B/PMCA/emei/Fer1HCH/Stim/SelG/Syx5/MICU3/Nhe1/Vha68-1/CG10362/CG17593/Nhe3/Vha100-1/ClC-c/ORMDL/Irp-1B/MICU1/RyR/Itpr/Zip71B/CG11367/Ae2/GPHR/Catsup/anne/sesB/ZnT77C/zyd/Cisd2/scaf6
GO:BP	cellular response to nitrogen compound	GO:1901699	55/3338	137/12653	0.000289174	0.00132984	0.000713275	Cul1/5-HT7/Lpin/sima/Usp47/Ns3/GlyP/Mkrn1/Sik3/Rheb/Crtc/sgg/S6k/drk/Lamtor1/5-HT2A/Glo1/slmb/raptor/Sirt1/rl/Lamtor3/wrd/Ptp61F/Pp2A-29B/Akt/Dsor1/chico/Fmr1/Pi3K92E/Cdc37/SkpA/HDAC4/RagA-B/step/STUB1/5-HT2B/srl/CG32638/Pdk1/Sik2/Roc1a/Rab10/cnk/nclb/Tor/Pten/Pi3K21B/InR/Gbeta5/RagC-D/Lamtor4/Thor/Ide/PRAS40
GO:BP	synaptic target recognition	GO:0008039	25/3338	50/12653	0.000296721	0.00135816	0.000728465	hig/sli/robo3/fz2/CG5758/dsd/Fas3/CG32373/Nrx-IV/CG8668/Sema2a/Npc2a/gek/tutl/nrm/Sema1a/dpr12/dsh/Fur1/Ptp69D/Sulf1/loaf/robo2/Con/Drl-2
GO:BP	regulation of cell projection assembly	GO:0060491	25/3338	50/12653	0.000296721	0.00135816	0.000728465	baz/pico/SCAR/ena/sif/C1GalTA/Abl/Arp2/Tm1/Rho1/hep/Arp3/PsGEF/Rab35/Flo2/DAAM/HSPC300/aPKC/cpb/Abi/Rac1/psidin/twf/Cdc42/cpa
GO:BP	regulation of plasma membrane bounded cell projection assembly	GO:0120032	25/3338	50/12653	0.000296721	0.00135816	0.000728465	baz/pico/SCAR/ena/sif/C1GalTA/Abl/Arp2/Tm1/Rho1/hep/Arp3/PsGEF/Rab35/Flo2/DAAM/HSPC300/aPKC/cpb/Abi/Rac1/psidin/twf/Cdc42/cpa
GO:BP	purine nucleotide metabolic process	GO:0006163	78/3338	209/12653	0.000305217	0.00139487	0.000748154	Gapdh1/Pfk/Ac3/Hex-A/Ald1/Pde11/Acsl/PyK/Eno/AMPdeam/blw/AdSS/ATPsyngamma/Pgi/ATPsynbeta/Pdhb/Tpi/Hmgs/Scox/Gapdh2/Mdh1/ATPsynF/Aps/Sik3/ScsbetaG/Men/Nmnat/Ak1/ATPsynD/CLS/Pgk/Pdha/Adk2/ATPsynCF6/sun/Papss/cu/bur/fbl/Gpdh1/Gycbeta100B/CG31183/Pglym78/Vha68-1/muc/Dg/CG8080/ScsbetaA/ATPCL/Nadsyn/CG11035/Sarm/CG33156/Ac76E/DIP2/Gyc89Da/ras/ATPsyndelta/CG2246/Ak2/Dpck/Gycalpha99B/Naprt/ATPsynbetaL/Hm…
GO:BP	oocyte development	GO:0048599	64/3338	165/12653	0.00030615	0.00139696	0.000749274	Ras85D/loco/baz/capu/orb/TER94/flw/cic/Khc/14-3-3zeta/lost/Rab11/tud/enc/milt/IKKepsilon/capt/DCTN2-p50/chb/Lkb1/bai/Rop/BicD/stau/par-1/slmb/lsn/DCP2/Pat1/fry/Smn/msps/Dhc64C/Tm1/alpha-Spec/Ge-1/Dg/Fmr1/CG7483/CSN5/spn-F/Sec5/Moe/btz/Syt1/sqh/Rab6/aPKC/mago/muskelin/aub/Nup154/mon2/Sry-delta/tsu/papi/CkIIalpha/wek/jagn/asun/Syp/sll/jvl/TBCB
GO:BP	germarium-derived oocyte fate determination	GO:0007294	16/3338	27/12653	0.000313185	0.00142684	0.000765302	baz/14-3-3zeta/enc/drosha/nudE/BicD/hts/par-1/Dhc64C/alpha-Spec/Fmr1/spn-A/aPKC/tsu/mus301/cpa
GO:BP	negative regulation of organelle organization	GO:0010639	35/3338	78/12653	0.000314972	0.00143276	0.000768476	Kank/tmod/Tango9/Patronin/spoon/Cip4/beta-Spec/Pink1/Efa6/LRR/RhoGAP68F/CG31715/alpha-Spec/Mad1/Apc/Sps1/RhoGAP92B/mask/CG15237/pds5/cpb/tacc/mv/Mi-2/twf/Bub1/Svil/Mnat9/sesB/Zw10/Vhl/spas/Gel/cpa/Rca1
GO:BP	regulation of synaptic plasticity	GO:0048167	20/3338	37/12653	0.000315959	0.00143502	0.00076969	Sap47/Cbp53E/comt/Syt4/shi/Sod2/Cat/kek6/dj-1beta/Rab3/Akt/chico/Src64B/Dys/Pi3K92E/Rab3GAP1/Neto/Mctp/Pten/Snap25
GO:BP	germarium-derived oocyte differentiation	GO:0030706	18/3338	32/12653	0.000326724	0.00147026	0.00078859	slmo/baz/14-3-3zeta/enc/drosha/nudE/BicD/hts/par-1/Dhc64C/alpha-Spec/MESR4/Fmr1/spn-A/aPKC/tsu/mus301/cpa
GO:BP	germ-line cyst formation	GO:0048134	18/3338	32/12653	0.000326724	0.00147026	0.00078859	CSN7/enc/drosha/Sxl/alien/hts/slmb/Dhc64C/alpha-Spec/Fmr1/CSN5/Cbl/NHP2/nsl1/Tor/CSN3/CSN1b/Pdcd4
GO:BP	vesicle docking	GO:0048278	18/3338	32/12653	0.000326724	0.00147026	0.00078859	CASK/Syx7/Syx13/Rop/nSyb/Rab3/Exo84/Syx6/Syx5/Sec10/Sec5/Syx17/Syx8/Rab8/Sec6/Snap25/Sec8/p115
GO:BP	mitochondrial electron transport, NADH to ubiquinone	GO:0006120	13/3338	20/12653	0.000325318	0.00147026	0.00078859	ND-B14.5B/ND-B14.5A/ND-B22/ND-51/ND-42/Pink1/ND-49/ND-B17/ND-19/ND-ASHI/ND-13A/ND-24/ND-23
GO:BP	cystoblast division	GO:0007282	13/3338	20/12653	0.000325318	0.00147026	0.00078859	CSN7/enc/chb/Sxl/alien/hts/Dhc64C/CSN5/hfp/NHP2/Tor/CSN3/CSN1b
GO:BP	negative regulation of protein polymerization	GO:0032272	13/3338	20/12653	0.000325318	0.00147026	0.00078859	Kank/tmod/spoon/Cip4/Efa6/LRR/CG31715/RhoGAP92B/cpb/twf/Svil/Gel/cpa
GO:BP	response to oxygen levels	GO:0070482	36/3338	81/12653	0.000327255	0.00147039	0.000788662	CG2918/Sdhaf3/Arl8/Mnn1/sima/UGP/Ulp1/CG11779/CG33129/VhaAC39-1/emb/CG9231/Tom40/Tm1/Ptp61F/Gpdh1/Gycbeta100B/Vha68-1/chico/MESR4/Drat/Gyc89Da/Hph/Srlp/Gycalpha99B/eIF2Bbeta/MFS14/tzn/Hsp70Ba/InR/Vhl/tko/jub/SH3PX1/eIF2Bgamma/CngA
GO:BP	peptidyl-serine phosphorylation	GO:0018105	26/3338	53/12653	0.000332983	0.00149384	0.00080124	mnb/Atg1/Dyrk3/Pkc53E/CG9098/CG32944/dco/mbt/IKKepsilon/dop/CG17528/Lk6/Dyrk2/Pink1/MAPk-Ak2/Akt/SRPK/Pkn/trc/Tlk/aPKC/Pdk1/CkIalpha/Prp4k/Aduk/awd
GO:BP	rhabdomere development	GO:0042052	23/3338	45/12653	0.000341013	0.0015252	0.000818059	mbl/SP2353/Rab11/capt/Mob2/vimar/fry/GAA1/msk/Amph/Syn2/Ire1/Synd/dysc/oc/Moe/PIG-S/DCTN1-p150/Rac1/Pten/Sec6/p47/EMC3
GO:BP	regulation of photoreceptor cell differentiation	GO:0046532	23/3338	45/12653	0.000341013	0.0015252	0.000818059	Ras85D/Nf-YB/Usp47/aop/mbt/Raf/spg/Kr-h1/rl/Socs36E/mask/alph/Src64B/csw/RasGAP1/oc/cdi/tinc/mop/sv/Dab/sty/Mbs
GO:BP	cellular response to nutrient levels	GO:0031669	40/3338	93/12653	0.000363119	0.0016216	0.000869762	l(3)80Fj/Ras85D/Atg1/Lpin/SNF4Agamma/AMPKalpha/Atg3/Raf/GlyS/Bruce/EndoA/car/Sirt4/Atg17/raptor/Vps16A/rl/Ire1/chico/Atg14/CG7536/CG12384/DopEcR/Pi3K92E/spin/Syx17/hid/HDAC4/RagA-B/Itpr/Atg9/Tor/CG10483/Mitf/Atg8a/Wdr59/InR/RagC-D/Pi3K59F/Atg18a
GO:BP	cellular response to chemical stress	GO:0062197	27/3338	56/12653	0.000367722	0.00163966	0.000879451	Atg1/Sirup/Chchd2/MsrA/kcc/Sod2/p38b/dj-1beta/CG32262/Grx1/Atg18b/rl/Egm/MTF-1/Fer2/puc/Mekk1/bsk/CG5056/Atg9/Jafrac1/sesB/CG14777/CG15547/Thor/CG1662/Idh
GO:BP	regulation of small molecule metabolic process	GO:0062012	21/3338	40/12653	0.000382393	0.00170249	0.00091315	Actbeta/Atg1/Lpin/SREBP/Scox/GlyP/Sik3/GlyS/Gabat/SCAP/Dg/eIF4EHP/adp/CG11035/CG42233/Fdx1/CG3589/CG3337/sesB/Pdk/Fdx2
GO:BP	synaptic vesicle docking	GO:0016081	12/3338	18/12653	0.00039529	0.00175193	0.00093967	CASK/Syx13/nSyb/Exo84/Syx6/Sec10/Sec5/Syx17/Syx8/Sec6/Snap25/Sec8
GO:BP	histone deacetylation	GO:0016575	12/3338	18/12653	0.00039529	0.00175193	0.00093967	Sirt1/ebi/CG14220/HDAC6/Sin3A/HDAC4/CG1620/HDAC11/CG16779/CoRest/msl-3/MTA1-like
GO:BP	negative regulation of actin filament polymerization	GO:0030837	12/3338	18/12653	0.00039529	0.00175193	0.00093967	Kank/tmod/spoon/Cip4/LRR/CG31715/RhoGAP92B/cpb/twf/Svil/Gel/cpa
GO:BP	imaginal disc-derived wing vein specification	GO:0007474	28/3338	59/12653	0.000400573	0.00176875	0.000948687	Ras85D/cic/Lpin/Raf/EloB/Past1/Dd/Hs3st-B/cv/msk/rl/sfl/Dg/EloA/S/Dys/Su(var)3-3/mor/Lpt/nmo/step/cnk/cv-2/corto/sty/brm/ash2/cv-d
GO:BP	anatomical structure regression	GO:0060033	28/3338	59/12653	0.000400573	0.00176875	0.000948687	Atg1/TER94/hdc/Uba1/MED24/drosha/drpr/Idh3b/l(3)psg2/Atg17/raptor/DCAF12/Mdh2/hid/Itpr/Eip74EF/Utx/Atg9/kto/Tor/Atg13/Pten/Atg8a/bel/Dif/Pi3K59F/Atg18a/rpr
GO:BP	postsynapse organization	GO:0099173	15/3338	25/12653	0.000400892	0.00176875	0.000948687	Nlg4/CG42673/Ulp1/Nmnat/pod1/Nlg2/Prosap/Smn/Nrx-1/PICK1/Neto/Fur1/cin/pira/Nlg3
GO:BP	imaginal disc-derived appendage morphogenesis	GO:0035114	124/3338	361/12653	0.000415479	0.00183035	0.00098173	Ras85D/Actbeta/hth/flw/Gclc/dally/cic/zip/Hs6st/pnut/Lpin/fz2/lgs/alphaSnap/RhoGAP19D/anchor/sno/svr/ct/unk/Nedd4/Raf/EloB/arm/Cip4/p38b/sgg/Dad/mam/stan/Axn/drk/Past1/Drak/Pcyt1/par-1/Dd/l(3)psg2/Grasp65/fry/peng/RhoGAP68F/Hs3st-B/cv/msk/rl/Socs36E/Stim/Cul3/fbl/Rho1/sfl/ebi/osa/ATP6AP2/Dg/Mad/EloA/nord/Vang/S/Asx/RhoGAP92B/Su(dx)/CycC/Dys/Cbl/wls/cos/RasGAP1/Su(var)3-3/sbb/mor/trc/Lpt/nmo/skd/P…
GO:BP	appendage development	GO:0048736	127/3338	371/12653	0.000416498	0.00183209	0.000982663	Ras85D/Actbeta/hth/flw/Gclc/dally/cic/zip/Hs6st/pnut/Lpin/fz2/lgs/alphaSnap/RhoGAP19D/anchor/sno/svr/ct/trh/unk/Nedd4/Raf/EloB/arm/Cip4/p38b/sgg/Dad/mam/stan/Axn/drk/Past1/Drak/Pcyt1/par-1/Dd/l(3)psg2/Grasp65/fry/peng/RhoGAP68F/Hs3st-B/cv/msk/rl/Socs36E/Stim/Cul3/fbl/Rho1/sfl/ebi/osa/ATP6AP2/Dg/Mad/EloA/nord/Vang/S/Asx/RhoGAP92B/Su(dx)/CycC/Dys/Cbl/wls/cos/RasGAP1/Su(var)3-3/sbb/mor/trc/Lpt/nmo/s…
GO:BP	positive regulation of protein-containing complex assembly	GO:0031334	17/3338	30/12653	0.000425056	0.00186136	0.000998363	shi/svr/dco/chb/Su(var)205/p38b/Lam/LRR/cnn/msps/Ssrp/Vrp1/DAAM/Rpt4/mv/Mnat9/Nup98-96
GO:BP	sevenless signaling pathway	GO:0045500	17/3338	30/12653	0.000425056	0.00186136	0.000998363	Ras85D/Usp47/aop/Raf/drk/spg/rl/Socs36E/Dsor1/mask/alph/Src64B/csw/RasGAP1/cdi/cnk/Dab
GO:BP	regulation of chromatin organization	GO:1902275	17/3338	30/12653	0.000425056	0.00186136	0.000998363	Usp7/wde/Su(var)205/Ulp1/Stat92E/Parp/bur/Ssrp/dre4/Su(var)3-3/Acf/mrt/lwr/Mekk1/hop/Bap60/CoRest
GO:BP	response to lipid	GO:0033993	29/3338	62/12653	0.000431269	0.00188576	0.00101145	MED24/Hydr2/Idh3b/Stat92E/G9a/Iswi/CG5412/l(3)psg2/Kr-h1/rig/Blimp-1/swi2/Sec13/DopEcR/Nurf-38/Lpt/hid/trr/Utx/kto/TBPH/pzg/su(Hw)/ash2/bel/lncRNA:let7C/Oatp74D/rpr/Nup98-96
GO:BP	imaginal disc-derived appendage development	GO:0048737	126/3338	368/12653	0.000433749	0.00189378	0.00101575	Ras85D/Actbeta/hth/flw/Gclc/dally/cic/zip/Hs6st/pnut/Lpin/fz2/lgs/alphaSnap/RhoGAP19D/anchor/sno/svr/ct/unk/Nedd4/Raf/EloB/arm/Cip4/p38b/sgg/Dad/mam/stan/Axn/drk/Past1/Drak/Pcyt1/par-1/Dd/l(3)psg2/Grasp65/fry/peng/RhoGAP68F/Hs3st-B/cv/msk/rl/Socs36E/Stim/Cul3/fbl/Rho1/sfl/ebi/osa/ATP6AP2/Dg/Mad/EloA/nord/Vang/S/Asx/RhoGAP92B/Su(dx)/CycC/Dys/Cbl/wls/cos/RasGAP1/Su(var)3-3/sbb/mor/trc/Lpt/nmo/skd/P…
GO:BP	positive regulation of canonical Wnt signaling pathway	GO:0090263	25/3338	51/12653	0.00043743	0.00190701	0.00102285	tws/flw/Eip63E/dally/Usp47/dco/Ssdp/hyd/Kap3/Klp64D/Nulp1/Wnk/nej/CycY/Rnf146/skd/ebd1/hyx/kto/apolpp/Pp1alpha-96A/nkd/rempA/CtBP/Tnks
GO:BP	ribonucleotide metabolic process	GO:0009259	70/3338	186/12653	0.000460071	0.00200274	0.00107419	Gapdh1/Pfk/Ac3/Hex-A/Ald1/Pde11/Cmpk/Acsl/PyK/Eno/AMPdeam/blw/AdSS/ATPsyngamma/Pgi/ATPsynbeta/Pdhb/Tpi/Hmgs/Scox/Gapdh2/ATPsynF/Aps/ScsbetaG/Ak1/ATPsynD/CLS/Pgk/Pdha/Adk2/ATPsynCF6/sun/Papss/bur/fbl/Gycbeta100B/CG31183/Pglym78/Vha68-1/muc/Dg/ScsbetaA/ATPCL/CG11035/Ac76E/Dhod/DIP2/Gyc89Da/ras/ATPsyndelta/Ak2/Dpck/Gycalpha99B/Ack/ATPsynbetaL/Hmgcr/ATPsynE/ATPsynO/ATPsynG/ATPsynC/Pmvk/CTPsyn/r/CG284…
GO:BP	regulation of cellular macromolecule biosynthetic process	GO:2000112	75/3338	202/12653	0.000470792	0.00204638	0.0010976	l(3)80Fj/orb/Larp4B/mxt/CG4612/Pop2/Xbp1/Pabp2/spoon/eIF3j/bsf/CG3662/Rga/Mkrn1/CG8963/Dp1/Not1/Sxl/Rheb/mEFTs/eIF4E1/bin3/eIF3a/Pink1/orb2/CG1578/Gbs-76A/Atx2/La/stau/DCP2/peng/twin/senju/Dph3/PAN2/Ythdf/Ge-1/eIF3d1/CG5726/mmy/Fmr1/larp/sip3/Srp9/eIF4EHP/rswl/eIF4G1/CG3862/Pi3K92E/pum/Dph5/Sbp2/roq/Not3/Rcd-1/SecS/aub/Patr-1/Hrb98DE/GAPsec/Suv3/smg/Pask/4E-T/Zfrp8/brat/PAN3/Syp/mus301/Rrp42/tyf/…
GO:BP	circadian behavior	GO:0048512	49/3338	121/12653	0.000477132	0.00207087	0.00111073	Ac3/Hk/qvr/kairos/Kdm5/dco/dod/inc/Sik3/Mid1/Ih/homer/Gabat/sgg/Pink1/tara/unc80/Atx2/Nf1/Pdfr/slmb/sxc/trsn/na/Cul3/cu/fbl/nej/Rho1/jet/Fmr1/unc79/S/dome/dysc/Dh44/Rdl/BTBD9/Acer/hop/Rac1/speck/cyc/Fbxl4/CkIIalpha/InR/Mbs/tyf/kay
GO:BP	peptidyl-serine modification	GO:0018209	26/3338	54/12653	0.000482471	0.00209095	0.0011215	mnb/Atg1/Dyrk3/Pkc53E/CG9098/CG32944/dco/mbt/IKKepsilon/dop/CG17528/Lk6/Dyrk2/Pink1/MAPk-Ak2/Akt/SRPK/Pkn/trc/Tlk/aPKC/Pdk1/CkIalpha/Prp4k/Aduk/awd
GO:BP	morphogenesis of a polarized epithelium	GO:0001738	43/3338	103/12653	0.000484479	0.00209498	0.00112366	Ras85D/baz/CadN/fred/zip/shi/rin/hbs/aop/dco/CadN2/stan/Pcyt1/par-1/Frl/kmr/msk/Dhc64C/nej/Rho1/ATP6AP2/Vang/yrt/S/nmo/LIMK1/dsh/sano/aPKC/Ankrd49/DCTN1-p150/SMC3/hop/Patj/Abi/Rac1/Pten/sty/Cdc42/tow/Jra/Mtl/kay
GO:BP	nuclear-transcribed mRNA catabolic process	GO:0000956	31/3338	68/12653	0.000485543	0.00209498	0.00112366	Rat1/Pop2/Pabp2/Rga/Not1/pix/DCP2/twin/PAN2/Ge-1/Upf2/pum/Smg5/LSm7/roq/Not3/Smg6/Rai1/Cbp80/aub/Zcchc7/Patr-1/Edc3/Ski6/smg/pelo/PAN3/Rrp42/Rrp6/RpLP0-like/LSm1
GO:BP	positive regulation of reproductive process	GO:2000243	31/3338	68/12653	0.000485543	0.00209498	0.00112366	E2f1/Cul1/Atg1/zip/Dp/aop/Mkrn1/par-1/slmb/Akt/hep/chico/Cbl/twe/Pi3K92E/SkpA/sqh/puc/kis/bsk/Adi1/Hrs/Nup154/Tor/Rac1/Atg13/Catsup/Rme-8/InR/Pi3K59F/kay
GO:BP	tricarboxylic acid cycle	GO:0006099	20/3338	38/12653	0.000502688	0.00216259	0.00115993	SdhA/CG5214/CG14757/SdhB/SdhC/mAcon1/Mdh1/Idh3b/SdhD/Ogdh/ScsbetaG/Idh3a/Scsalpha1/Mdh2/ScsbetaA/ATPCL/Fum1/kdn/Irp-1B/CG12895
GO:BP	positive regulation of secretion	GO:0051047	20/3338	38/12653	0.000502688	0.00216259	0.00115993	Sec24CD/BicD/hob/AdipoR/Vps35/Sec23/Flo2/S/RhoGAP92B/wls/Rab3GAP1/Tango1/Glut1/Cadps/Itpr/Rab1/mop/Hrs/jar/SH3PX1
GO:BP	lipid modification	GO:0030258	32/3338	71/12653	0.000508957	0.00218635	0.00117268	sp3/Sac1/Synj/frj/CG14411/nes/INPP5E/Abcd3/SERCA/wun/AdipoR/Egm/5PtaseI/Acat2/Ocrl/Mtpbeta/FIG4/ACOX1/CG6805/CG6707/CROT/Etf-QO/CG8778/wal/CG31140/CG3589/Pten/CRAT/rdgA/Mulk/Ech1/CG31717
GO:BP	synaptic vesicle transport	GO:0048489	14/3338	23/12653	0.00051106	0.00219218	0.0011758	shi/Khc/lap/Liprin-alpha/Rop/Blos1/Fmr1/Aplip1/BORCS5/AP-2alpha/DCTN1-p150/sesB/Snap25/Miro
GO:BP	negative regulation of Wnt signaling pathway	GO:0030178	23/3338	46/12653	0.000513125	0.00219782	0.00117883	HUWE1/Cul1/TER94/aop/sgg/gro/Axn/Duba/slmb/nej/Rho1/RanBP3/Apc/Bili/Sin3A/SkpA/nmo/Roc1a/CkIalpha/SoxN/nkd/Sulf1/CtBP
GO:BP	oocyte construction	GO:0007308	58/3338	149/12653	0.000515141	0.00220324	0.00118173	Ras85D/loco/baz/capu/orb/TER94/flw/cic/Khc/14-3-3zeta/lost/Rab11/tud/enc/milt/IKKepsilon/capt/DCTN2-p50/chb/Lkb1/bai/Rop/BicD/stau/par-1/slmb/lsn/DCP2/Pat1/msps/Dhc64C/Tm1/alpha-Spec/Ge-1/Dg/Fmr1/CG7483/CSN5/spn-F/Moe/btz/Syt1/sqh/Rab6/aPKC/mago/aub/mon2/Sry-delta/tsu/papi/CkIIalpha/wek/asun/Syp/sll/jvl/TBCB
GO:BP	intracellular protein transmembrane transport	GO:0065002	27/3338	57/12653	0.00052474	0.00223777	0.00120025	Trp1/CG2918/Sec61beta/Pex13/CG11779/Sec61alpha/CG7382/Roe1/CG8860/Hsp60A/Tom7/Tim23/CG7394/Tom40/Tom70/Hsc70-5/CG6454/Pex14/Srp54k/blp/Sec63/Pex5/CG8206/mge/CG8531/CG12379/Pex6
GO:BP	protein transmembrane transport	GO:0071806	27/3338	57/12653	0.00052474	0.00223777	0.00120025	Trp1/CG2918/Sec61beta/Pex13/CG11779/Sec61alpha/CG7382/Roe1/CG8860/Hsp60A/Tom7/Tim23/CG7394/Tom40/Tom70/Hsc70-5/CG6454/Pex14/Srp54k/blp/Sec63/Pex5/CG8206/mge/CG8531/CG12379/Pex6
GO:BP	appendage morphogenesis	GO:0035107	124/3338	363/12653	0.000531854	0.00226482	0.00121476	Ras85D/Actbeta/hth/flw/Gclc/dally/cic/zip/Hs6st/pnut/Lpin/fz2/lgs/alphaSnap/RhoGAP19D/anchor/sno/svr/ct/unk/Nedd4/Raf/EloB/arm/Cip4/p38b/sgg/Dad/mam/stan/Axn/drk/Past1/Drak/Pcyt1/par-1/Dd/l(3)psg2/Grasp65/fry/peng/RhoGAP68F/Hs3st-B/cv/msk/rl/Socs36E/Stim/Cul3/fbl/Rho1/sfl/ebi/osa/ATP6AP2/Dg/Mad/EloA/nord/Vang/S/Asx/RhoGAP92B/Su(dx)/CycC/Dys/Cbl/wls/cos/RasGAP1/Su(var)3-3/sbb/mor/trc/Lpt/nmo/skd/P…
GO:BP	ovarian nurse cell to oocyte transport	GO:0007300	18/3338	33/12653	0.000542506	0.00227927	0.00122251	loco/Msp300/flw/SCAR/Khc/ena/Abl/hts/rngo/kel/Cortactin/pcs/Src64B/sqh/cpb/jar/Nup154/Catsup
GO:BP	actin cytoskeleton reorganization	GO:0031532	18/3338	33/12653	0.000542506	0.00227927	0.00122251	RhoGEF3/SCAR/Vav/Rab11/pod1/Actn/LRR/Rho1/Arp3/Pkn/Dg/p130CAS/Akap200/Rac1/mon2/sced/Cdc42/Mtl
GO:BP	ribosomal subunit export from nucleus	GO:0000054	10/3338	14/12653	0.00054457	0.00227927	0.00122251	Ns3/pix/emb/Nmd3/CG11123/Ran/LTV1/CG32409/CG13185/mbo
GO:BP	regulation of cell morphogenesis involved in differentiation	GO:0010769	10/3338	14/12653	0.00054457	0.00227927	0.00122251	nudC/GM130/nudE/G9a/Sec23/Sar1/Rab35/Rab1/lva/spas
GO:BP	positive regulation of neuron maturation	GO:0014042	10/3338	14/12653	0.00054457	0.00227927	0.00122251	Cul1/slmb/Dhc64C/Sec71/Pi3K92E/spn-F/Roc1a/bsk/Sox14/InR
GO:BP	ribosome localization	GO:0033750	10/3338	14/12653	0.00054457	0.00227927	0.00122251	Ns3/pix/emb/Nmd3/CG11123/Ran/LTV1/CG32409/CG13185/mbo
GO:BP	regulation of neuronal synaptic plasticity	GO:0048168	10/3338	14/12653	0.00054457	0.00227927	0.00122251	Sap47/comt/shi/Rab3/Dys/Pi3K92E/Rab3GAP1/Neto/Mctp/Snap25
GO:BP	protein autoubiquitination	GO:0051865	10/3338	14/12653	0.00054457	0.00227927	0.00122251	Iru/Herc4/rdx/dbo/msl-2/Ubr3/KLHL18/CG12099/Keap1/CG7694
GO:BP	positive regulation of wound healing	GO:0090303	10/3338	14/12653	0.00054457	0.00227927	0.00122251	Cad96Ca/rl/Rho1/Pkn/Tor/Rac1/holn1/InR/Cdc42/Mtl
GO:BP	positive regulation of intracellular protein transport	GO:0090316	10/3338	14/12653	0.00054457	0.00227927	0.00122251	Abl/tral/Tom7/Klp64D/CG6454/Sar1/Ttd14/Nup154/RanBPM/rempA
GO:BP	positive regulation of cell maturation	GO:1903431	10/3338	14/12653	0.00054457	0.00227927	0.00122251	Cul1/slmb/Dhc64C/Sec71/Pi3K92E/spn-F/Roc1a/bsk/Sox14/InR
GO:BP	positive regulation of neuron remodeling	GO:1904801	10/3338	14/12653	0.00054457	0.00227927	0.00122251	Cul1/slmb/Dhc64C/Sec71/Pi3K92E/spn-F/Roc1a/bsk/Sox14/InR
GO:BP	mitochondrial transport	GO:0006839	34/3338	77/12653	0.0005483	0.00228836	0.00122739	Tango9/CG14130/UQCR-C1/CG31229/CG11779/CG7382/Roe1/OXA1L/CG7639/Hsp60A/Tom7/Tim23/CG7394/Tom40/Tom70/Rim2/Hsc70-5/CG14894/Tim9a/Tim8/CG7791/CG8728/blp/CG8206/Ucp4A/mge/CG11110/sesB/CG4942/CG1847/CG8531/CG12379/Cisd2/Miro
GO:BP	mitochondrial transmembrane transport	GO:1990542	34/3338	77/12653	0.0005483	0.00228836	0.00122739	Sfxn2/GC1/CG9399/EMRE/Mpcp2/mfrn/CG11779/Mpc1/CG7382/ABCB7/Roe1/Hsp60A/Tom7/Tim23/mRpL18/CG7394/Tom40/CG7943/Tom70/Rim2/Hsc70-5/MICU3/Sfxn1-3/blp/Tpc1/CG8206/MICU1/mge/porin/sesB/aralar1/DPCoAC/CG8531/CG12379
GO:BP	peptidyl-amino acid modification	GO:0018193	117/3338	340/12653	0.000551146	0.0022896	0.00122805	mnb/Atg1/Dyrk3/GABPI/DMAP1/Pkc53E/Ctr9/CG9098/Tpst/Set1/CG32944/Pgant2/Dpy-30L1/dco/mbt/IKKepsilon/dop/CG17528/ND-ACP/Sik3/Lkb1/Ulp1/Lk6/Dyrk2/TTLL4A/CG14408/Wee1/Abl/Hmt4-20/msl-2/Pink1/Fak/CG1578/Wdr82/MBD-R2/G9a/Naa80/gek/CG9804/l(3)02640/MAPk-Ak2/Sirt1/Dph3/Taf10b/nej/Akt/SRPK/Rcd1/isoQC/Pkn/CG1407/Naa20A/cyp33/Spt20/pcs/Gcn5/Dnz1/Ing5/Src64B/Cbl/Dph5/Moca-cyp/Nmt/ASPP/CG9643/CG2852/CG15864/t…
GO:BP	membrane invagination	GO:0010324	16/3338	28/12653	0.000552501	0.0022896	0.00122805	drpr/Asap/Graf/sau/hep/Rab35/crq/vib/Synd/csw/AP-2alpha/Mekk1/bsk/Rac1/psidin/Zw10
GO:BP	negative regulation of cell projection organization	GO:0031345	16/3338	28/12653	0.000552501	0.0022896	0.00122805	baz/CadN/Abl/Sema2a/fry/Kr-h1/Ythdf/Fmr1/Sema1a/trc/Sema1b/cpb/Rac1/Pten/bif/cpa
GO:BP	regulation of intracellular protein transport	GO:0033157	16/3338	28/12653	0.000552501	0.0022896	0.00122805	rdx/Abl/sgg/tral/Tom7/Klp64D/CG6454/Sar1/Apc/wls/Ttd14/Nup154/RanBPM/Arl1/rempA/mbo
GO:BP	plasma membrane invagination	GO:0099024	16/3338	28/12653	0.000552501	0.0022896	0.00122805	drpr/Asap/Graf/sau/hep/Rab35/crq/vib/Synd/csw/AP-2alpha/Mekk1/bsk/Rac1/psidin/Zw10
GO:BP	positive regulation of autophagy	GO:0010508	24/3338	49/12653	0.000574978	0.00237939	0.00127621	Atg1/shi/Synj/sima/AMPKalpha/Pink1/S6k/AP-1-2beta/Doa/hep/Cpsf6/CycC/Traf6/hid/Sbf/Fer2/AP-2alpha/bsk/Rab21/Aduk/Mitf/PEK/Lerp/Cdk8
GO:BP	microtubule organizing center organization	GO:0031023	37/3338	86/12653	0.000589475	0.00243594	0.00130655	tws/Wdr62/gammaTub23C/Khc/Prosbeta5/Patronin/Map205/chb/ens/Wee1/nudE/hts/emb/CCT6/slmb/CG32425/Prosbeta7/Ubc6/cnn/msps/Dhc64C/Pp2A-29B/Rcd1/CG17493/spd-2/Plp/Grip84/Invadolysin/Klp10A/SkpA/mgr/Cp110/DCTN1-p150/Vhl/Rcd4/Sas-6/ncd
GO:BP	rhythmic behavior	GO:0007622	49/3338	122/12653	0.000596005	0.00245946	0.00131916	Ac3/Hk/qvr/kairos/Kdm5/dco/dod/inc/Sik3/Mid1/Ih/homer/Gabat/sgg/Pink1/tara/unc80/Atx2/Nf1/Pdfr/slmb/sxc/trsn/na/Cul3/cu/fbl/nej/Rho1/jet/Fmr1/unc79/S/dome/dysc/Dh44/Rdl/BTBD9/Acer/hop/Rac1/speck/cyc/Fbxl4/CkIIalpha/InR/Mbs/tyf/kay
GO:BP	axonal defasciculation	GO:0007414	9/3338	12/12653	0.00060188	0.00246636	0.00132286	RhoGAPp190/beat-Ic/beat-Ia/p130CAS/tutl/mew/trol/Ptp69D/Ptp99A
GO:BP	positive regulation of cell morphogenesis involved in differentiation	GO:0010770	9/3338	12/12653	0.00060188	0.00246636	0.00132286	nudC/GM130/nudE/G9a/Sec23/Sar1/Rab1/lva/spas
GO:BP	regulation of fibroblast growth factor receptor signaling pathway	GO:0040036	9/3338	12/12653	0.00060188	0.00246636	0.00132286	dally/Ptp10D/Ptp4E/sxc/vap/Src64B/nst/trol/sty
GO:BP	vesicle transport along microtubule	GO:0047496	9/3338	12/12653	0.00060188	0.00246636	0.00132286	Khc-73/milt/Liprin-alpha/nudE/Dhc64C/Aplip1/BORCS5/DCTN1-p150/Klp98A
GO:BP	positive regulation of dendrite morphogenesis	GO:0050775	9/3338	12/12653	0.00060188	0.00246636	0.00132286	nudC/GM130/nudE/G9a/Sec23/Sar1/Rab1/lva/spas
GO:BP	cellular response to extracellular stimulus	GO:0031668	40/3338	95/12653	0.000611611	0.00250274	0.00134237	l(3)80Fj/Ras85D/Atg1/Lpin/SNF4Agamma/AMPKalpha/Atg3/Raf/GlyS/Bruce/EndoA/car/Sirt4/Atg17/raptor/Vps16A/rl/Ire1/chico/Atg14/CG7536/CG12384/DopEcR/Pi3K92E/spin/Syx17/hid/HDAC4/RagA-B/Itpr/Atg9/Tor/CG10483/Mitf/Atg8a/Wdr59/InR/RagC-D/Pi3K59F/Atg18a
GO:BP	positive regulation of protein serine/threonine kinase activity	GO:0071902	8/3338	10/12653	0.000616212	0.00251806	0.00135059	Ccm3/fry/raptor/Rho1/Pi3K92E/step/Mat1/Rac1
GO:BP	cell adhesion	GO:0007155	81/3338	223/12653	0.000628011	0.0025627	0.00137454	sli/beat-IIa/plum/baz/CadN/SCAR/beat-Ib/Nlg4/fred/Sec24CD/beat-IIb/Cad87A/beat-Ic/hbs/CG5758/beat-VI/aop/mbt/Fas3/CadN2/beat-Vc/Lkb1/kirre/tei/arm/beat-IIIb/CG7166/Nrx-IV/stan/fra/Nrt/Nlg2/par-1/beat-Va/Cad96Ca/Sec23/Ret/Rab4/beat-Ia/p130CAS/Flo2/tutl/Dscam3/CG34353/Cont/Src64B/Invadolysin/alpha-Catr/glec/Ggamma1/sns/brn/mew/Arpc4/tkv/caps/muskelin/mop/Jafrac1/POSH/PlexB/CG13506/Abi/Rac1/pygo/Ran…
GO:BP	cellular response to oxidative stress	GO:0034599	25/3338	52/12653	0.00063334	0.00258086	0.00138427	Atg1/Sirup/Chchd2/MsrA/Sod2/p38b/dj-1beta/CG32262/Grx1/Atg18b/rl/Egm/MTF-1/Fer2/puc/bsk/CG5056/Atg9/Jafrac1/sesB/CG14777/CG15547/Thor/CG1662/Idh
GO:BP	ovarian follicle cell migration	GO:0007297	57/3338	147/12653	0.000641097	0.00260885	0.00139928	Ras85D/CASK/baz/Vav/zip/shi/Rab11/spoon/ena/aop/dop/cindr/Raf/nudE/Stat92E/par-1/slmb/Dhc64C/Socs36E/Akt/Rho1/hep/Dsor1/chico/Vang/veli/kel/Cortactin/Ptpmeg2/dome/Cbl/Pi3K92E/Sec5/Rab5/sqh/dsh/puc/kis/brn/Rab7/bsk/cpb/Hrs/jar/hop/Abi/Rac1/psidin/twf/Catsup/Rme-8/Sec6/mys/InR/Sec15/Sec8/kay
GO:BP	axonal fasciculation	GO:0007413	13/3338	21/12653	0.000647969	0.00262952	0.00141037	CadN/SCAR/uzip/Fas3/bchs/Nrt/Arp3/mmy/Fmr1/Hsc70-4/Rac1/Ptp69D/Con
GO:BP	phospholipid dephosphorylation	GO:0046839	13/3338	21/12653	0.000647969	0.00262952	0.00141037	sp3/Sac1/Synj/CG14411/INPP5E/wun/5PtaseI/Ocrl/FIG4/CG6805/CG6707/Pten/CG31717
GO:BP	regulation of microtubule-based process	GO:0032886	31/3338	69/12653	0.000661382	0.00267286	0.00143362	tws/atl/futsch/Patronin/sigmar/DCTN2-p50/chb/ens/CG18675/beta-Spec/sgg/Efa6/BicD/slmb/Lam/Pat1/cnn/msps/alpha-Spec/Apc/Eb1/Moe/BORCS5/tacc/CG8031/TBPH/mv/Mnat9/Vhl/spas/ncd
GO:BP	organophosphate ester transport	GO:0015748	19/3338	36/12653	0.00066126	0.00267286	0.00143362	slmo/scramb1/SCaMC/CG31729/prel/ATP8A/rdgB/Rim2/CG33298/vib/CDC50/Tpc1/CG13893/CG32485/ScpX/scramb2/sesB/CG30109/sll
GO:BP	positive regulation of secretion by cell	GO:1903532	19/3338	36/12653	0.00066126	0.00267286	0.00143362	Sec24CD/BicD/hob/AdipoR/Vps35/Sec23/Flo2/S/RhoGAP92B/wls/Rab3GAP1/Glut1/Cadps/Itpr/Rab1/mop/Hrs/jar/SH3PX1
GO:BP	positive regulation of smoothened signaling pathway	GO:0045880	22/3338	44/12653	0.000675484	0.00272609	0.00146217	tws/Usp7/dally/dco/Sxl/Ubr3/Tnpo/C3G/bur/nej/hyx/lwr/Su(var)2-10/aPKC/Rpn13/CkIalpha/Uch-L5/apolpp/trol/Gprk1/Sulf1/CkIIalpha
GO:BP	female germ-line stem cell population maintenance	GO:0036099	17/3338	31/12653	0.000711121	0.00286598	0.0015372	CSN7/mxt/Rga/Nedd8/S6k/alien/AdipoR/CSN6/CSN5/Pi3K92E/lili/Hrb98DE/Tif-IA/enok/CSN3/CSN1b/InR
GO:BP	positive regulation of protein polymerization	GO:0032273	15/3338	26/12653	0.000717319	0.00286732	0.00153792	shi/svr/dco/chb/p38b/Lam/LRR/cnn/msps/Ssrp/Vrp1/DAAM/mv/Mnat9/Nup98-96
GO:BP	dsRNA transport	GO:0033227	15/3338	26/12653	0.000717319	0.00286732	0.00153792	HUWE1/VhaSFD/RASSF8/Bet3/AGO2/CG8671/Sap-r/CG5382/Srp72/CG4572/Rab7/Arl1/Pi3K59F/Trs20/Cog2
GO:BP	regulation of receptor-mediated endocytosis	GO:0048259	15/3338	26/12653	0.000717319	0.00286732	0.00153792	Pkc53E/lap/cindr/aux/Nedd4/Nak/Graf/BicD/drk/Cortactin/Cbl/PICK1/krz/Uvrag/CG8507
GO:BP	positive regulation of filopodium assembly	GO:0051491	15/3338	26/12653	0.000717319	0.00286732	0.00153792	pico/SCAR/ena/sif/hep/Arp3/Rab35/Flo2/DAAM/HSPC300/aPKC/Abi/Rac1/Cdc42/cpa
GO:BP	synaptic vesicle localization	GO:0097479	15/3338	26/12653	0.000717319	0.00286732	0.00153792	shi/Khc/lap/Liprin-alpha/Rop/wrd/Blos1/Fmr1/Aplip1/BORCS5/AP-2alpha/DCTN1-p150/sesB/Snap25/Miro
GO:BP	macromolecule deacylation	GO:0098732	15/3338	26/12653	0.000717319	0.00286732	0.00153792	Sirt4/Sirt1/Sirt2/ebi/CG14220/HDAC6/Ppt2/Sin3A/HDAC4/CG1620/HDAC11/CG16779/CoRest/msl-3/MTA1-like
GO:BP	protein import into nucleus	GO:0006606	27/3338	58/12653	0.000737558	0.00294421	0.00157916	Ripalpha/rdx/sgg/Ntf-2/cdm/Tnpo/Klp64D/CG10286/Ran/msk/Sec13/Nxt1/Nup93-2/Arts/Nup50/Rcc1/Tnpo-SR/Nup154/Kap-alpha3/rempA/Nup358/Kap-alpha1/mbo/Apl/Nup75/Nup98-96/Fs(2)Ket
GO:BP	regulation of alternative mRNA splicing, via spliceosome	GO:0000381	37/3338	87/12653	0.000768333	0.00306289	0.00164282	mbl/CG6999/Hrb87F/HnRNP-K/x16/Sxl/CG4119/CG14641/CG11360/snf/snRNP-U1-70K/Doa/Srp54/qkr58E-1/snRNP-U1-C/U2af38/qkr58E-2/Prp39/SF2/Cpsf6/Psi/CG2926/hfp/Dbp45A/ps/CG10418/Saf-B/Hrb98DE/pea/qkr54B/fand/Mettl3/Sf3a1/fl(2)d/pps/Prp19/CG5728
GO:BP	regulation of immune system process	GO:0002682	95/3338	270/12653	0.000778418	0.00308676	0.00165562	Ras85D/E2f1/Cul1/PPP4R2r/TM9SF2/DMAP1/bnl/SP2353/Pkc53E/fz2/EMRE/sima/ben/Usp2/Sod2/tub/GlyP/IKKepsilon/Herc4/Cat/Hr78/RYBP/scny/puf/p38b/GstO2/hyd/wun/Ntf-2/Stat92E/Parp/Doa/key/MED6/slmb/Lam/LRR/senju/Akt/Ubc4/Pli/hep/Bgb/chico/PDCD-5/crq/Sarm/CSN5/betaCOP/Etl1/flfl/Traf6/Pi3K92E/Nxt1/CG9636/Nurf-38/Sin3A/Diap2/Nsun5/CG13994/mor/SkpA/Crag/vvl/Deaf1/RyR/lwr/Su(var)2-10/puc/UbcE2M/aub/bsk/mop/smo…
GO:BP	rRNA metabolic process	GO:0016072	64/3338	170/12653	0.000779581	0.00308676	0.00165562	CG6999/CG4866/drosha/Nopp140/mRpS11/CG1789/CG32706/CG11030/CG2260/CG6724/dbe/Rrp47/CG11123/Non3/CG1463/Mtr4/CG14805/LTV1/Pop5/Trmt112/CG7637/Snp/CG4364/Nop60B/CG32409/CG7275/Rpt4/CG32708/Nsun5/Sas10/Dbp45A/TAF1B/CG6833/CG10903/CG11417/NHP2/Pop4/Zcchc7/Rexo5/udd/CG3817/nclb/Tif-IA/l(1)G0020/CG15916/kz/Ski6/pit/CG3735/CG8204/brat/pelo/CG4338/CG3008/CG2691/Rrp42/Rrp6/CG6686/CG6712/mRpL44/RpS16/RpLP0…
GO:BP	stem cell population maintenance	GO:0019827	44/3338	108/12653	0.000779062	0.00308676	0.00165562	CSN7/dally/mxt/Kdm5/Rab11/Rga/chb/Nedd8/scny/arm/sgg/Dad/mam/S6k/Stat92E/alien/Axn/Treh/AdipoR/Socs36E/CSN6/Mad/CSN5/da/Pi3K92E/lilli/dsh/lili/tkv/nsl1/Hrb98DE/hop/nclb/Tif-IA/enok/CSN3/CSN1b/bel/mys/Rap2l/InR/pelo/Nup98-96/shv
GO:BP	maintenance of cell number	GO:0098727	44/3338	108/12653	0.000779062	0.00308676	0.00165562	CSN7/dally/mxt/Kdm5/Rab11/Rga/chb/Nedd8/scny/arm/sgg/Dad/mam/S6k/Stat92E/alien/Axn/Treh/AdipoR/Socs36E/CSN6/Mad/CSN5/da/Pi3K92E/lilli/dsh/lili/tkv/nsl1/Hrb98DE/hop/nclb/Tif-IA/enok/CSN3/CSN1b/bel/mys/Rap2l/InR/pelo/Nup98-96/shv
GO:BP	cellular response to unfolded protein	GO:0034620	20/3338	39/12653	0.00077792	0.00308676	0.00165562	Trap1/Spp/Xbp1/Der-2/Der-1/Hsp60A/Herp/crc/Hsc70-5/Ire1/Edem1/sip3/CG32276/Hsc70-1/Hsc70-4/CG6766/Hsp70Ba/PEK/Atf6/Edem2
GO:BP	late endosome to vacuole transport	GO:0045324	12/3338	19/12653	0.000815523	0.00322472	0.00172962	shrb/Vta1/CG30423/Stam/lsn/Vps28/CHMP2B/Vps20/CG15012/mop/Chmp1/Vps24
GO:BP	regulation of cellular response to growth factor stimulus	GO:0090287	29/3338	64/12653	0.000823448	0.00325168	0.00174407	dally/Lpin/anchor/Ptp10D/lqf/p38b/Dad/Ptp4E/Tao/Dd/sxc/vap/cv/Ptp61F/nord/Src64B/RasGAP1/spin/Cul2/lili/MAN1/cv-2/nst/trol/hiw/sty/faf/cv-d/PRAS40
GO:BP	positive regulation of stress-activated MAPK cascade	GO:0032874	18/3338	34/12653	0.000870474	0.00342815	0.00183873	ALiX/Mnn1/ben/sigmar/rdx/slpr/lncRNA:Hsromega/crc/Traf6/Alg-2/Mekk1/slim/Atg9/POSH/Rac1/PEK/Cdc42/rpr
GO:BP	positive regulation of stress-activated protein kinase signaling cascade	GO:0070304	18/3338	34/12653	0.000870474	0.00342815	0.00183873	ALiX/Mnn1/ben/sigmar/rdx/slpr/lncRNA:Hsromega/crc/Traf6/Alg-2/Mekk1/slim/Atg9/POSH/Rac1/PEK/Cdc42/rpr
GO:BP	meiotic spindle organization	GO:0000212	21/3338	42/12653	0.000889919	0.00350003	0.00187728	gammaTub23C/fwd/wac/hts/sau/brun/Ran/Exo84/SRPK/ghi/larp/vib/Synd/fws/Klp10A/mgr/Nup154/pelo/Axs/Sec8/ncd
GO:BP	response to ecdysone	GO:0035075	25/3338	53/12653	0.000901515	0.00353616	0.00189666	MED24/Idh3b/G9a/Iswi/l(3)psg2/Kr-h1/rig/Blimp-1/swi2/Sec13/DopEcR/Nurf-38/Lpt/hid/trr/Utx/kto/pzg/su(Hw)/ash2/bel/lncRNA:let7C/Oatp74D/rpr/Nup98-96
GO:BP	response to sterol	GO:0036314	25/3338	53/12653	0.000901515	0.00353616	0.00189666	MED24/Idh3b/G9a/Iswi/l(3)psg2/Kr-h1/rig/Blimp-1/swi2/Sec13/DopEcR/Nurf-38/Lpt/hid/trr/Utx/kto/pzg/su(Hw)/ash2/bel/lncRNA:let7C/Oatp74D/rpr/Nup98-96
GO:BP	female germ-line cyst formation	GO:0048135	14/3338	24/12653	0.000929823	0.00363263	0.0019484	CSN7/drosha/Sxl/alien/hts/slmb/alpha-Spec/CSN5/NHP2/nsl1/Tor/CSN3/CSN1b/Pdcd4
GO:BP	protein localization to vacuole	GO:0072665	14/3338	24/12653	0.000929823	0.00363263	0.0019484	car/Stam/lsn/Vps28/Mon1/Vps37B/Su(dx)/p/mop/Vsp37A/Vps13/Vps8/Vps13D/Lamtor4
GO:BP	positive regulation of response to wounding	GO:1903036	14/3338	24/12653	0.000929823	0.00363263	0.0019484	atl/drpr/Cad96Ca/rl/Akt/Rho1/Pkn/Tor/Rac1/holn1/InR/spas/Cdc42/Mtl
GO:BP	RNA polyadenylation	GO:0043631	16/3338	29/12653	0.000932322	0.00363271	0.00194845	orb/Pabp2/bsf/Wdr33/swm/hrg/Fmr1/Trf4-1/Cpsf6/ZC3H3/Zcchc7/Cpsf73/Cpsf100/Suv3/Pcf11/CG4266
GO:BP	autophagic cell death	GO:0048102	16/3338	29/12653	0.000932322	0.00363271	0.00194845	hdc/MED24/drpr/Idh3b/l(3)psg2/Atg17/DCAF12/Mdh2/crq/hid/Itpr/Eip74EF/Utx/kto/bel/rpr
GO:BP	instar larval development	GO:0002168	33/3338	76/12653	0.000940337	0.00365908	0.00196259	Ras85D/Eip63E/fz2/lgs/Raf/deltaCOP/arm/sds22/sgg/Dad/gammaCOP/Axn/Sec23/Sar1/Apc/Sec13/Pi3K92E/Moe/blp/bs/caps/jar/SoxN/ecd/pygo/Alh/Top1/ash2/bel/Pu/AdamTS-A/Eogt/SrpRbeta
GO:BP	purine nucleotide biosynthetic process	GO:0006164	45/3338	112/12653	0.0009675	0.00375979	0.00201661	Ac3/Acsl/AMPdeam/blw/AdSS/ATPsyngamma/ATPsynbeta/Pdhb/Scox/ATPsynF/Nmnat/ATPsynD/CLS/Pdha/Adk2/ATPsynCF6/sun/Papss/bur/fbl/Gycbeta100B/CG31183/muc/ATPCL/Nadsyn/CG11035/CG33156/Ac76E/DIP2/Gyc89Da/ras/ATPsyndelta/CG2246/Ak2/Dpck/Gycalpha99B/Naprt/ATPsynbetaL/ATPsynE/ATPsynO/ATPsynG/ATPsynC/awd/CG3337/sesB
GO:BP	regulation of cell morphogenesis	GO:0022604	35/3338	82/12653	0.000973891	0.00377962	0.00202724	SCAR/Sec24CD/Rab11/capt/raw/nudC/slpr/Abl/GM130/nudE/G9a/Naus/fry/Frl/Arpc2/Rho1/Sec23/Sar1/Rab35/Moe/HSPC300/trc/Rab1/Arpc4/hop/PlexB/Abi/Rac1/Pten/lva/FER/mys/spas/Cdc42/Mtl
GO:BP	alternative mRNA splicing, via spliceosome	GO:0000380	37/3338	88/12653	0.000993293	0.00384282	0.00206114	mbl/CG6999/Hrb87F/HnRNP-K/x16/Sxl/CG4119/CG14641/CG11360/snf/snRNP-U1-70K/Doa/Srp54/qkr58E-1/snRNP-U1-C/U2af38/qkr58E-2/Prp39/SF2/Cpsf6/Psi/CG2926/hfp/Dbp45A/ps/CG10418/Saf-B/Hrb98DE/pea/qkr54B/fand/Mettl3/Sf3a1/fl(2)d/pps/Prp19/CG5728
GO:BP	tube formation	GO:0035148	22/3338	45/12653	0.000995414	0.00384282	0.00206114	Rbcn-3A/Dlic/Sac1/Sec24CD/ct/trh/CCT3/garz/gammaCOP/Smn/Dhc64C/kkv/Rho1/Sec23/Rab35/mmy/Moe/wkd/sqh/Act5C/DCTN1-p150/Vhl
GO:BP	filopodium assembly	GO:0046847	22/3338	45/12653	0.000995414	0.00384282	0.00206114	baz/pico/SCAR/bnl/ena/sif/C1GalTA/Arp2/Rho1/hep/Arp3/Rab35/Flo2/DAAM/HSPC300/aPKC/cpb/sn/Abi/Rac1/Cdc42/cpa
GO:BP	nucleus localization	GO:0051647	22/3338	45/12653	0.000995414	0.00384282	0.00206114	Msp300/flw/Khc/AGO2/nudC/ens/nudE/BicD/Lam/Dhc64C/koi/sqh/DCTN1-p150/tacc/kud/jar/tsu/faf/Bsg/l(3)mbt/asun/jvl
GO:BP	wound healing	GO:0042060	38/3338	91/12653	0.000998306	0.00384892	0.00206441	RhoGEF3/Ras85D/zip/TTLL4A/Stam/Csgalnact/Cad96Ca/rl/Eaf/Pc/Akt/Rho1/hep/Pkn/Eb1/mask/Gs1l/CG30010/LeuRS/sqh/Coq3/puc/Arpc4/CkIalpha/Utx/bsk/sn/Tor/Rac1/holn1/CG42259/aralar1/InR/Cdc42/EMC3/Jra/Mtl/kay
GO:BP	alcohol metabolic process	GO:0006066	39/3338	94/12653	0.00100052	0.00385239	0.00206627	Marf/Synj/l(1)G0196/Tpi/Ipp/Gpo1/woc/Pect/Idh3b/Aps/Idh3a/CG9391/dj-1beta/SCAP/lace/5PtaseI/Gpdh1/Ocrl/CG14721/Tbh/Drat/Hsl/CG6805/Gk2/Tango14/CG14883/Pmvk/Fdh/ecd/Pten/speck/Inos/CG1271/Pu/CG7789/scu/CG15743/Sodh-2/Idh
GO:BP	regulation of neuron maturation	GO:0014041	11/3338	17/12653	0.00101593	0.00389129	0.00208714	Cul1/hdc/slmb/Dhc64C/Sec71/Pi3K92E/spn-F/Roc1a/bsk/Sox14/InR
GO:BP	Golgi to plasma membrane protein transport	GO:0043001	11/3338	17/12653	0.00101593	0.00389129	0.00208714	comt/Rab11/Nsf2/sau/Arfrp1/Sec71/wls/Sec5/Crag/Sec6/CG5447
GO:BP	regulation of cell maturation	GO:1903429	11/3338	17/12653	0.00101593	0.00389129	0.00208714	Cul1/hdc/slmb/Dhc64C/Sec71/Pi3K92E/spn-F/Roc1a/bsk/Sox14/InR
GO:BP	regulation of neuron remodeling	GO:1904799	11/3338	17/12653	0.00101593	0.00389129	0.00208714	Cul1/hdc/slmb/Dhc64C/Sec71/Pi3K92E/spn-F/Roc1a/bsk/Sox14/InR
GO:BP	negative regulation of RNA metabolic process	GO:0051253	114/3338	335/12653	0.00101921	0.00389879	0.00209116	E2f1/scrt/DMAP1/cic/CG12236/gcl/ct/aop/Sxl/Su(var)205/arm/CG9776/Hexim/snRNP-U1-70K/alien/Wdr82/Eip78C/gro/Kdm4B/G9a/Iswi/escl/Nulp1/Ssb-c31a/CG14073/noc/Smr/Sirt1/swm/CG32767/CG10631/CG12605/Pc/Mnt/CG4360/ebi/nvy/Mad/Blimp-1/Fmr1/simj/pho/Pcl/Psi/ph-d/Asx/CG14220/Hr3/HDAC6/CG12384/CG2199/CG3847/pum/Su(var)3-3/oc/Sap130/Max/e(y)3/Sin3A/sbb/CG3065/Bin1/Acf/HDAC4/CG1620/CG1529/CG12071/mrt/CG14655/H…
GO:BP	oxoacid metabolic process	GO:0043436	129/3338	386/12653	0.00109922	0.00419936	0.00225237	slgA/Gapdh1/Pfk/Hex-A/SdhA/Ald1/CG9674/Acsl/PyK/Eno/Sdhaf3/ThrRS/CG17691/MsrA/FASN1/Lpin/CG12173/SREBP/P5cr/CG44242/Men-b/Pgi/Pdhb/Hydr2/P5CDh1/Tpi/CG14130/Gapdh2/Mdh1/CG7430/CG16935/TyrRS/ND-ACP/Idh3b/Ogdh/Mpc1/Idh3a/Ssadh/CG5191/CG1486/CG8814/Abcd3/Gabat/SERCA/Men/GatA/AhcyL1/AspRS-m/TrpRS/AlaRS/dj-1beta/Pgk/Pdha/Sply/Hydr1/Gdh/AdipoR/Papss/GLS/Fatp1/CysRS-m/inaE/Egm/Sc2/Kyat/Pglym78/CG1764/muc…
GO:BP	regulation of immune response	GO:0050776	78/3338	217/12653	0.00110836	0.00422878	0.00226815	Cul1/PPP4R2r/TM9SF2/DMAP1/bnl/SP2353/EMRE/sima/ben/Usp2/tub/GlyP/IKKepsilon/Herc4/Hr78/RYBP/scny/puf/p38b/GstO2/hyd/wun/Ntf-2/Stat92E/Parp/Doa/key/MED6/slmb/Lam/LRR/senju/Ubc4/Pli/hep/chico/PDCD-5/crq/Sarm/betaCOP/Etl1/flfl/Traf6/Nxt1/Diap2/Nsun5/CG13994/mor/SkpA/Crag/vvl/Deaf1/lwr/Su(var)2-10/puc/UbcE2M/aub/bsk/mop/smog/Rac1/Pp1alpha-96A/Aos1/psidin/Pp4-19C/brm/faf/DPCoAC/HBS1/imd/akirin/MED25/D…
GO:BP	dephosphorylation	GO:0016311	73/3338	201/12653	0.00113684	0.00433181	0.00232342	tws/sp3/Sac1/Synj/CG9578/Ptp10D/Ipp/CG14411/CG12091/INPP5E/Ptp4E/wun/CG7115/CG5567/Dd/CG9391/janA/CanB2/I-2/wrd/Ptp61F/Pp2A-29B/5PtaseI/Pp2B-14D/Ocrl/endos/CG34183/Ptpmeg2/FIG4/flfl/Mppe/alph/fmt/twe/csw/CG10417/CG6805/CG16890/Pdp/Mipp2/CG13994/PRL-1/CG6707/CG17294/Acph-1/CG10376/CG17746/puc/Ankle2/Epp/mop/Fcp1/PpD3/PPP1R15/Patj/Pp1alpha-96A/mtm/Pten/Ptp69D/Tap42/Pp2C1/Pp4-19C/Pgam5/CG10089/CG268…
GO:BP	positive regulation of JNK cascade	GO:0046330	17/3338	32/12653	0.00114677	0.00435833	0.00233764	ALiX/Mnn1/ben/sigmar/rdx/slpr/lncRNA:Hsromega/crc/Traf6/Alg-2/Mekk1/Atg9/POSH/Rac1/PEK/Cdc42/rpr
GO:BP	regulation of response to wounding	GO:1903034	17/3338	32/12653	0.00114677	0.00435833	0.00233764	Cbp53E/atl/Csp/drpr/Cad96Ca/rl/Akt/Rho1/Pkn/Tor/Rac1/Pten/holn1/InR/spas/Cdc42/Mtl
GO:BP	positive regulation of transcription by RNA polymerase II	GO:0045944	108/3338	316/12653	0.00115294	0.00437611	0.00234718	tou/E2f1/exd/hth/ADD1/Lpin/Ctr9/lgs/Wbp2/Xbp1/sno/sima/Kdm5/trh/Cdk12/Ssdp/Su(var)205/arm/Crtc/mam/Camta/MBD-R2/Iswi/key/CG12054/crc/Axud1/Ssb-c31a/Cf2/Met/CG10555/Rtf1/nej/Rcd1/CG1603/MED19/Mad/gce/MTF-1/Asx/Hr3/Gcn5/Sec13/sage/mask/da/CG10543/CycC/CG2199/Rpt4/dre4/lilli/wda/Su(var)3-3/oc/Max/M1BP/Lpt/MED10/bs/ebd1/vvl/Sbf/Nup50/srl/hyx/Hsf/Nelf-E/Eip74EF/GATAd/trr/CG4496/nsl1/kto/SoxN/spt4/sv/C…
GO:BP	membrane docking	GO:0022406	20/3338	40/12653	0.00117345	0.00444245	0.00238276	CASK/Syx7/Syx13/Vap33/Rop/nSyb/Rab3/Exo84/Syx6/Syx5/Sec10/CG10362/Sec5/Syx17/Syx8/Rab8/Sec6/Snap25/Sec8/p115
GO:BP	organelle localization by membrane tethering	GO:0140056	20/3338	40/12653	0.00117345	0.00444245	0.00238276	CASK/Syx7/Syx13/Vap33/Rop/nSyb/Rab3/Exo84/Syx6/Syx5/Sec10/CG10362/Sec5/Syx17/Syx8/Rab8/Sec6/Snap25/Sec8/p115
GO:BP	regulation of cell population proliferation	GO:0042127	80/3338	224/12653	0.00119495	0.00451803	0.0024233	Dap160/Ras85D/E2f1/Actbeta/hth/tws/bnl/Pkc53E/Ctr9/fz2/Syx7/Tango9/Mnn1/Sod2/Cat/Nedd4/Raf/Madm/Rheb/sds22/Stat92E/Doa/Prosap/key/slmb/Axud1/Lam/rl/Cul3/CG17059/Ptp61F/Akt/MAGE/osa/Bgb/chico/Fmr1/CSN5/vsg/dome/Ing5/Rae1/Cbl/Pi3K92E/Nurf-38/Moe/Sin3A/mor/mats/hfp/Cdc37/Rab5/CG6770/RyR/lwr/vito/aPKC/Utx/SoxN/hop/Nup154/trol/Uvrag/Pten/brm/Ntan1/Bap60/Xrp1/Pi3K21B/btd/brat/l(3)mbt/InR/msl-3/sd/Dif/N…
GO:BP	regulation of cell cycle	GO:0051726	104/3338	303/12653	0.00119829	0.00451805	0.0024233	mnb/Septin2/E2f1/tws/Cul1/Wdr62/flw/gammaTub23C/dally/Lpin/SNF4Agamma/Mnn1/ben/Cdc27/CG9578/Dp/cindr/chb/fzr/Bruce/Wee1/Cdc2rk/Hexim/sgg/Sap30/PhKgamma/Graf/Stam/COX5A/slmb/Lam/cnn/Smr/Ran/Dhc64C/Aven/Capr/CG30291/fbl/nej/Mnt/CG31687/Prp38/Pkn/CG40191/Dsor1/Mad/Mad1/CycY/Ocrl/Fmr1/Cdc7/RecQ5/endos/CSN5/Grip84/Rae1/twe/Pi3K92E/pum/Invadolysin/Moe/Sin3A/Diap2/mor/SkpA/CG5181/ssp/CG6770/CG15237/Rcc1…
GO:BP	positive regulation of neuron differentiation	GO:0045666	13/3338	22/12653	0.00120266	0.00451805	0.0024233	mnb/Ras85D/Nf-YB/mbt/Raf/rl/omd/RasGAP1/oc/CG13001/IntS1/mop/IntS2
GO:BP	negative chemotaxis	GO:0050919	13/3338	22/12653	0.00120266	0.00451805	0.0024233	sli/robo3/fz2/wun/Sema2a/Sema1a/Wnt5/dsh/Sema1b/Ptp69D/Sulf1/robo2/Drl-2
GO:BP	negative regulation of ERK1 and ERK2 cascade	GO:0070373	13/3338	22/12653	0.00120266	0.00451805	0.0024233	CG6180/ATPsynD/Ubc6/poe/Ptp61F/alph/Cbl/Ufd4/Kcmf1/sty/Spred/RhoGAP5A/PTP-ER
GO:BP	neuron projection fasciculation	GO:0106030	13/3338	22/12653	0.00120266	0.00451805	0.0024233	CadN/SCAR/uzip/Fas3/bchs/Nrt/Arp3/mmy/Fmr1/Hsc70-4/Rac1/Ptp69D/Con
GO:BP	negative regulation of cell population proliferation	GO:0008285	32/3338	74/12653	0.0012131	0.00455147	0.00244123	tws/Ctr9/Syx7/Mnn1/sds22/Doa/key/slmb/Axud1/Lam/Ptp61F/MAGE/osa/Fmr1/CSN5/Ing5/mor/mats/hfp/Rab5/CG6770/lwr/Utx/Uvrag/Pten/brm/Ntan1/Bap60/Xrp1/brat/l(3)mbt/sd
GO:BP	axon choice point recognition	GO:0016198	15/3338	27/12653	0.00122249	0.00456914	0.00245071	sli/Sac1/RhoGAP93B/Nedd4/Abl/beta-Spec/fra/alpha-Spec/beat-Ia/eIF2beta/tutl/Sema1a/Trim9/Rac1/Galphaq
GO:BP	autophagosome maturation	GO:0097352	15/3338	27/12653	0.00122249	0.00456914	0.00245071	TER94/stj/car/Vps28/Vps16A/CG8155/Vps4/Vamp7/Vha100-1/ema/Syx17/Sbf/Rab39/Rab21/Mitf
GO:BP	regulation of presynapse organization	GO:0099174	15/3338	27/12653	0.00122249	0.00456914	0.00245071	CASK/Atg1/p38b/ND-20/S6k/Nlg2/Nrx-1/Aplip1/TBPH/Tor/hiw/Spn/spas/Thor/Nup75
GO:BP	synaptic vesicle priming	GO:0016082	10/3338	15/12653	0.00124702	0.00464901	0.00249355	comt/gammaSnap1/alphaSnap/Nsf2/Vps45/Vap33/Rop/gammaSnap2/stac/Snap25
GO:BP	positive regulation of lipid biosynthetic process	GO:0046889	10/3338	15/12653	0.00124702	0.00464901	0.00249355	elm/Dd/schlank/eIF4EHP/iPLA2-VIA/Fdx1/Pex3/PIP5K59B/Cds/Fdx2
GO:BP	regulation of gene expression, epigenetic	GO:0040029	59/3338	157/12653	0.00128594	0.00478801	0.0025681	lncRNA:roX2/Usp7/ADD1/wde/scf/AGO2/dop/Dp1/Sxl/Su(var)205/Ulp1/scny/Hmt4-20/msl-2/Stat92E/tara/G9a/Iswi/escl/Lam/phol/Sirt1/bur/Pc/Su(var)2-HP2/Fmr1/pho/Top2/Su(var)3-3/Bin1/Acf/lwr/Mekk1/aub/Utx/Su(z)2/hop/corto/XNP/su(Hw)/Pp2C1/brm/Hers/CG10038/Mettl3/Bap60/CoRest/ash2/CG8677/ash1/HP1c/msl-3/Sce/MBD-like/Scm/msl-1/e(y)2/Ibf2/Ndf
GO:BP	negative regulation of protein modification process	GO:0031400	26/3338	57/12653	0.00133412	0.00495482	0.00265757	shi/svr/dco/SCCRO4/CG14408/Wee1/Hexim/sgg/Dad/hyd/I-2/CG17059/Ssrp/CG8209/endos/pcs/Cbl/CG13994/CG10376/Cand1/Patj/Pten/sty/PRAS40/Rca1/CG9246
GO:BP	response to ketone	GO:1901654	26/3338	57/12653	0.00133412	0.00495482	0.00265757	MED24/Idh3b/G9a/Iswi/l(3)psg2/Kr-h1/Vps35/rig/Blimp-1/swi2/Sec13/DopEcR/Nurf-38/Lpt/hid/trr/Utx/kto/pzg/su(Hw)/ash2/bel/lncRNA:let7C/Oatp74D/rpr/Nup98-96
GO:BP	response to alcohol	GO:0097305	50/3338	129/12653	0.00134815	0.00500058	0.00268212	Nmdar1/Syn/CASK/Bacc/MED24/hang/Idh3b/slpr/homer/Efa6/G9a/Iswi/Tao/l(3)psg2/vap/Clic/Kr-h1/Sirt1/rig/rl/Blimp-1/Tbh/CG17734/Drat/S/Vrp1/swi2/vsg/Sec13/DopEcR/rogdi/pum/Nurf-38/Akap200/Lpt/hid/Arfip/Itpr/trr/Utx/kto/pzg/su(Hw)/Atat/ash2/bel/lncRNA:let7C/Oatp74D/rpr/Nup98-96
GO:BP	R7 cell fate commitment	GO:0007465	18/3338	35/12653	0.00135384	0.00501535	0.00269004	Ras85D/Usp47/aop/Raf/drk/spg/rl/Socs36E/Dsor1/mask/alph/Src64B/Cbl/csw/RasGAP1/cdi/cnk/Dab
GO:BP	import into nucleus	GO:0051170	27/3338	60/12653	0.00139659	0.00516722	0.0027715	Ripalpha/rdx/sgg/Ntf-2/cdm/Tnpo/Klp64D/CG10286/Ran/msk/Sec13/Nxt1/Nup93-2/Arts/Nup50/Rcc1/Tnpo-SR/Nup154/Kap-alpha3/rempA/Nup358/Kap-alpha1/mbo/Apl/Nup75/Nup98-96/Fs(2)Ket
GO:BP	carboxylic acid metabolic process	GO:0019752	128/3338	385/12653	0.00142694	0.00527284	0.00282815	slgA/Gapdh1/Pfk/Hex-A/SdhA/Ald1/CG9674/Acsl/PyK/Eno/Sdhaf3/ThrRS/CG17691/MsrA/FASN1/Lpin/CG12173/SREBP/P5cr/CG44242/Men-b/Pgi/Pdhb/Hydr2/P5CDh1/Tpi/CG14130/Gapdh2/Mdh1/CG7430/CG16935/TyrRS/ND-ACP/Idh3b/Ogdh/Mpc1/Idh3a/Ssadh/CG5191/CG1486/CG8814/Abcd3/Gabat/SERCA/Men/GatA/AhcyL1/AspRS-m/TrpRS/AlaRS/dj-1beta/Pgk/Pdha/Sply/Hydr1/Gdh/AdipoR/GLS/Fatp1/CysRS-m/inaE/Egm/Sc2/Kyat/Pglym78/CG1764/muc/Dg/Md…
GO:BP	positive regulation of cell growth	GO:0030307	22/3338	46/12653	0.00143751	0.00530523	0.00284552	atl/dco/Rheb/puf/mRpL12/S6k/stan/raptor/Akt/Vang/Wnt5/Pi3K92E/Hph/RagA-B/srl/dsh/vito/Pdk1/Rac1/Tcs5/InR/spas
GO:BP	oocyte axis specification	GO:0007309	55/3338	145/12653	0.00144009	0.00530806	0.00284704	Ras85D/loco/baz/capu/orb/TER94/flw/cic/Khc/14-3-3zeta/lost/Rab11/tud/enc/milt/IKKepsilon/capt/DCTN2-p50/bai/Rop/BicD/stau/par-1/slmb/lsn/DCP2/Pat1/msps/Dhc64C/Tm1/Ge-1/Dg/Fmr1/CG7483/CSN5/spn-F/Moe/btz/Syt1/sqh/Rab6/aPKC/mago/aub/mon2/Sry-delta/tsu/papi/CkIIalpha/wek/asun/Syp/sll/jvl/TBCB
GO:BP	positive regulation of cell migration	GO:0030335	28/3338	63/12653	0.00145044	0.00533284	0.00286033	sli/ths/zip/ena/aop/fra/Sema2a/par-1/slmb/LRR/Akt/hep/chico/Sema1a/Cbl/Pi3K92E/sqh/puc/kis/Sema1b/bsk/Hrs/Rac1/Catsup/Rme-8/robo2/InR/kay
GO:BP	TOR signaling	GO:0031929	28/3338	63/12653	0.00145044	0.00533284	0.00286033	Ras85D/Atg1/CG9578/AMPKalpha/Rheb/S6k/ATPsynD/drk/Lamtor1/wcy/raptor/REPTOR-BP/Lamtor3/wrd/Akt/Sec13/Socs16D/Mipp2/RagA-B/Atg9/Tor/scyl/Tcs5/chrb/Wdr59/RagC-D/Lamtor4/PRAS40
GO:BP	larval development	GO:0002164	70/3338	193/12653	0.00147796	0.00542042	0.0029073	Ras85D/E2f1/Msp300/Marf/Eip63E/ths/fz2/Khc/lgs/Kdm5/tub/unk/Kdm2/kirre/Raf/deltaCOP/EloB/arm/ens/sds22/sgg/Dad/Stat92E/gammaCOP/Axn/Tnpo/Smn/rl/Syx5/Sec23/Sar1/Apc/CSN5/Sec13/Pi3K92E/Gale/Moe/blp/Sin3A/skd/bs/sns/lwr/GlyRS/caps/nsl1/CTPsyn/jar/SoxN/Drp1/hop/Tor/Zif/ecd/pygo/Alh/Pten/sty/Gug/Top1/ash2/bel/mys/akirin/Pu/AdamTS-A/Eogt/Oatp74D/SrpRbeta/Nup98-96
GO:BP	regulation of translation	GO:0006417	70/3338	193/12653	0.00147796	0.00542042	0.0029073	l(3)80Fj/orb/Larp4B/mxt/CG4612/Pop2/Xbp1/Pabp2/spoon/eIF3j/bsf/Rga/Mkrn1/CG8963/Dp1/Not1/Sxl/Rheb/mEFTs/eIF4E1/bin3/eIF3a/Pink1/orb2/CG1578/Atx2/La/stau/DCP2/peng/twin/Dph3/PAN2/Ythdf/Ge-1/eIF3d1/CG5726/Fmr1/larp/sip3/Srp9/eIF4EHP/rswl/eIF4G1/CG3862/Pi3K92E/pum/Dph5/Sbp2/roq/Not3/Rcd-1/SecS/aub/Patr-1/Hrb98DE/GAPsec/Suv3/smg/4E-T/Zfrp8/brat/PAN3/Syp/mus301/Rrp42/tyf/Thor/eIF3b/LSm1
GO:BP	postsynaptic membrane organization	GO:0001941	9/3338	13/12653	0.00149706	0.00543609	0.00291571	Nlg4/pod1/Nlg2/Smn/Nrx-1/Neto/Fur1/cin/Nlg3
GO:BP	NAD metabolic process	GO:0019674	9/3338	13/12653	0.00149706	0.00543609	0.00291571	Mdh1/Men/Nmnat/Gpdh1/CG8080/Nadsyn/Sarm/CG33156/Naprt
GO:BP	late endosome to vacuole transport via multivesicular body sorting pathway	GO:0032511	9/3338	13/12653	0.00149706	0.00543609	0.00291571	shrb/Vta1/CG30423/Stam/lsn/Vps28/Vps20/CG15012/mop
GO:BP	autophagy of nucleus	GO:0044804	9/3338	13/12653	0.00149706	0.00543609	0.00291571	Atg1/Atg3/Atg17/Atg18b/CG11975/Atg9/Atg13/Aduk/Atg18a
GO:BP	protein neddylation	GO:0045116	9/3338	13/12653	0.00149706	0.00543609	0.00291571	SCCRO/Nedd8/SCCRO4/SCCRO3/CG17059/UbcE2M/Cand1/Roc1a/APP-BP1
GO:BP	establishment or maintenance of neuroblast polarity	GO:0045196	9/3338	13/12653	0.00149706	0.00543609	0.00291571	tws/Lkb1/msps/mgr/aPKC/Zif/Pfdn2/Cdc42/Arl2
GO:BP	regulation of sevenless signaling pathway	GO:0045501	9/3338	13/12653	0.00149706	0.00543609	0.00291571	Usp47/spg/Socs36E/mask/alph/Src64B/RasGAP1/cdi/Dab
GO:BP	positive regulation of organ growth	GO:0046622	9/3338	13/12653	0.00149706	0.00543609	0.00291571	mnb/bchs/Akt/chico/Pi3K92E/Pdk1/kis/wap/InR
GO:BP	regulation of neuromuscular synaptic transmission	GO:1900073	16/3338	30/12653	0.00151205	0.00548377	0.00294128	CASK/comt/Csp/jeb/Nmnat/dj-1beta/Nrx-1/Fmr1/Nadsyn/dysc/Syt1/Alk/hiw/Galphaq/spas/Syp
GO:BP	organic acid metabolic process	GO:0006082	129/3338	389/12653	0.00152505	0.00552408	0.0029629	slgA/Gapdh1/Pfk/Hex-A/SdhA/Ald1/CG9674/Acsl/PyK/Eno/Sdhaf3/ThrRS/CG17691/MsrA/FASN1/Lpin/CG12173/SREBP/P5cr/CG44242/Men-b/Pgi/Pdhb/Hydr2/P5CDh1/Tpi/CG14130/Gapdh2/Mdh1/CG7430/CG16935/TyrRS/ND-ACP/Idh3b/Ogdh/Mpc1/Idh3a/Ssadh/CG5191/CG1486/CG8814/Abcd3/Gabat/SERCA/Men/GatA/AhcyL1/AspRS-m/TrpRS/AlaRS/dj-1beta/Pgk/Pdha/Sply/Hydr1/Gdh/AdipoR/Papss/GLS/Fatp1/CysRS-m/inaE/Egm/Sc2/Kyat/Pglym78/CG1764/muc…
GO:BP	carbohydrate catabolic process	GO:0016052	30/3338	69/12653	0.00153383	0.0055422	0.00297262	Gapdh1/Pfk/Hex-A/Ald1/Actbeta/PyK/Atg1/Eno/Pgi/Tpi/Gapdh2/GlyP/Sik3/Atg3/GlyS/PhKgamma/Pgk/Atg17/Treh/Pglym78/Dg/betaGlu/Gale/Atg9/CG15117/CG10467/CG9485/Atg18a/CG7059/Sodh-2
GO:BP	protein localization to nucleus	GO:0034504	30/3338	69/12653	0.00153383	0.0055422	0.00297262	Ripalpha/hth/rdx/sgg/Ntf-2/Parp/cdm/Tnpo/Klp64D/Lam/CG10286/Ran/msk/Sec13/Nxt1/Nup93-2/Arts/Nup50/Rcc1/Tnpo-SR/Nup154/Kap-alpha3/rempA/Nup358/Kap-alpha1/mbo/Apl/Nup75/Nup98-96/Fs(2)Ket
GO:BP	actin filament bundle organization	GO:0061572	19/3338	38/12653	0.0015488	0.00557615	0.00299083	Khc/IKKepsilon/Actn/hts/Naus/RhoGAP68F/Tm1/Rho1/hep/DAAM/Src64B/dsh/sn/Abi/Rac1/FER/mys/Mtl/jvl
GO:BP	chitin-based larval cuticle pattern formation	GO:0035293	12/3338	20/12653	0.00155083	0.00557615	0.00299083	fz2/lgs/arm/sgg/Axn/Sec23/Sar1/Apc/Sec13/SoxN/pygo/SrpRbeta
GO:BP	positive regulation of receptor-mediated endocytosis	GO:0048260	12/3338	20/12653	0.00155083	0.00557615	0.00299083	Pkc53E/lap/cindr/Nedd4/Graf/BicD/drk/Cortactin/Cbl/PICK1/krz/Uvrag
GO:BP	dendrite self-avoidance	GO:0070593	12/3338	20/12653	0.00155083	0.00557615	0.00299083	stan/fry/Rho1/Vang/tutl/Dscam3/Cont/trc/PlexB/Dscam2/Bsg/esn
GO:BP	cellular response to external stimulus	GO:0071496	41/3338	102/12653	0.0015743	0.00565359	0.00303237	l(3)80Fj/Ras85D/Atg1/zip/Lpin/SNF4Agamma/AMPKalpha/Atg3/Raf/GlyS/Bruce/EndoA/car/Sirt4/Atg17/raptor/Vps16A/rl/Ire1/chico/Atg14/CG7536/CG12384/DopEcR/Pi3K92E/spin/Syx17/hid/HDAC4/RagA-B/Itpr/Atg9/Tor/CG10483/Mitf/Atg8a/Wdr59/InR/RagC-D/Pi3K59F/Atg18a
GO:BP	axon midline choice point recognition	GO:0016199	14/3338	25/12653	0.00160301	0.00572169	0.00306889	sli/Sac1/RhoGAP93B/Nedd4/Abl/beta-Spec/fra/alpha-Spec/eIF2beta/tutl/Sema1a/Trim9/Rac1/Galphaq
GO:BP	larval midgut cell programmed cell death	GO:0035096	14/3338	25/12653	0.00160301	0.00572169	0.00306889	Atg1/TER94/Uba1/Atg17/raptor/Mdh2/hid/Atg9/Tor/Atg13/Atg8a/Pi3K59F/Atg18a/rpr
GO:BP	protein deacylation	GO:0035601	14/3338	25/12653	0.00160301	0.00572169	0.00306889	Sirt4/Sirt1/Sirt2/ebi/CG14220/HDAC6/Sin3A/HDAC4/CG1620/HDAC11/CG16779/CoRest/msl-3/MTA1-like
GO:BP	regulation of animal organ morphogenesis	GO:2000027	14/3338	25/12653	0.00160301	0.00572169	0.00306889	baz/fred/zip/aop/dco/par-1/kmr/rl/Vang/nmo/aPKC/Ankrd49/Pten/sd
GO:BP	regulation of terminal button organization	GO:2000331	14/3338	25/12653	0.00160301	0.00572169	0.00306889	CASK/Atg1/p38b/ND-20/S6k/Nlg2/Nrx-1/Aplip1/TBPH/Tor/hiw/spas/Thor/Nup75
GO:BP	microtubule cytoskeleton organization	GO:0000226	125/3338	376/12653	0.00161566	0.00574586	0.00308186	kl-3/l(2)41Ab/Msp300/baz/tws/Wdr62/TER94/atl/Dlic/gammaTub23C/Sac1/futsch/Khc/14-3-3zeta/Prosbeta5/Patronin/Khc-73/Rab11/Tbce/Map205/alphaTub84D/sigmar/IKKepsilon/capt/DCTN2-p50/chb/hook/Lkb1/CG4511/ens/Vap33/fwd/TTLL4A/Wee1/wac/beta-Spec/nudE/sgg/Kap3/orb2/bchs/Efa6/BicD/hts/emb/tral/CCT6/sau/par-1/Nop17l/slmb/Klp64D/Lam/CG32425/brun/Prosbeta7/Ubc6/cnn/msps/DCTN6-p27/Ran/Exo84/Dhc64C/Pp2A-29B/SR…
GO:BP	establishment of planar polarity	GO:0001736	38/3338	93/12653	0.0016146	0.00574586	0.00308186	Ras85D/baz/CadN/fred/zip/rin/hbs/aop/dco/CadN2/stan/Pcyt1/par-1/Frl/kmr/msk/nej/Rho1/ATP6AP2/Vang/S/nmo/LIMK1/dsh/sano/Ankrd49/SMC3/hop/Patj/Abi/Rac1/Pten/sty/Cdc42/tow/Jra/Mtl/kay
GO:BP	establishment of tissue polarity	GO:0007164	38/3338	93/12653	0.0016146	0.00574586	0.00308186	Ras85D/baz/CadN/fred/zip/rin/hbs/aop/dco/CadN2/stan/Pcyt1/par-1/Frl/kmr/msk/nej/Rho1/ATP6AP2/Vang/S/nmo/LIMK1/dsh/sano/Ankrd49/SMC3/hop/Patj/Abi/Rac1/Pten/sty/Cdc42/tow/Jra/Mtl/kay
GO:BP	germ-line stem cell population maintenance	GO:0030718	35/3338	84/12653	0.00162302	0.00576507	0.00309216	CSN7/dally/mxt/Kdm5/Rab11/Rga/Nedd8/scny/Dad/mam/S6k/Stat92E/alien/AdipoR/Socs36E/CSN6/Mad/CSN5/Pi3K92E/lili/tkv/nsl1/Hrb98DE/nclb/Tif-IA/enok/CSN3/CSN1b/bel/mys/Rap2l/InR/pelo/Nup98-96/shv
GO:BP	learning or memory	GO:0007611	62/3338	168/12653	0.00165294	0.0058575	0.00314174	Sap47/Nmdar1/mnb/Syn/CASK/futsch/CG4612/shi/14-3-3zeta/dbr/Scamp/svr/spoon/Ptp10D/eag/arm/Abl/sgg/Pink1/Mob2/orb2/Stat92E/sra/Atx2/gry/G9a/drk/Nf1/stau/wcy/Socs36E/CRMP/Blos1/Nrx-1/ATP6AP2/CenG1A/chico/Fmr1/simj/Tbh/vsg/dome/Src64B/DopEcR/pum/lilli/bs/HDAC4/MICU1/Rdl/BOD1/aPKC/kis/Alk/bsk/hop/Fdh/Rac1/hiw/Psn/cer/ebo
GO:BP	regulation of epithelial cell migration	GO:0010632	24/3338	52/12653	0.00165304	0.0058575	0.00314174	sli/zip/aop/Stam/par-1/slmb/Akt/hep/chico/Cbl/Pi3K92E/Sin3A/sqh/puc/kis/bsk/Hrs/Rac1/Catsup/Rme-8/robo2/InR/Pu/kay
GO:BP	pyruvate metabolic process	GO:0006090	20/3338	41/12653	0.00172865	0.00604434	0.00324195	Gapdh1/Pfk/Hex-A/Ald1/PyK/Eno/Men-b/Pgi/Pdhb/Tpi/Gapdh2/Mpc1/Men/Pgk/Pdha/Pglym78/muc/Dg/CG31075/CG7059
GO:BP	response to unfolded protein	GO:0006986	20/3338	41/12653	0.00172865	0.00604434	0.00324195	Trap1/Spp/Xbp1/Der-2/Der-1/Hsp60A/Herp/crc/Hsc70-5/Ire1/Edem1/sip3/CG32276/Hsc70-1/Hsc70-4/CG6766/Hsp70Ba/PEK/Atf6/Edem2
GO:BP	tRNA aminoacylation	GO:0043039	20/3338	41/12653	0.00172865	0.00604434	0.00324195	ThrRS/TyrRS/GatA/AspRS-m/TrpRS/AlaRS/CysRS-m/alpha-PheRS/SerRS/LeuRS/TyrRS-m/TrpRS-m/GlyRS/IleRS/GatB/AsnRS/Slimp/PheRS-m/ArgRS/ArgRS-m
GO:BP	protein deneddylation	GO:0000338	8/3338	11/12653	0.00173461	0.00604434	0.00324195	CSN7/Den1/alien/CSN6/CSN5/CSN3/CSN1b/CSN8
GO:BP	posttranslational protein targeting to endoplasmic reticulum membrane	GO:0006620	8/3338	11/12653	0.00173461	0.00604434	0.00324195	Trp1/CG2918/Sgt/CG1598/Sec61beta/Sec61alpha/CG8860/Sec63
GO:BP	retrograde axonal transport	GO:0008090	8/3338	11/12653	0.00173461	0.00604434	0.00324195	Dlc90F/DCTN2-p50/Dhc64C/Arp10/Arp1/Aplip1/DCTN5-p25/DCTN1-p150
GO:BP	negative regulation of actin filament depolymerization	GO:0030835	8/3338	11/12653	0.00173461	0.00604434	0.00324195	tmod/LRR/CG31715/cpb/twf/Svil/Gel/cpa
GO:BP	lysosome localization	GO:0032418	8/3338	11/12653	0.00173461	0.00604434	0.00324195	Arl8/prd1/Rilpl/CG10681/bchs/Blos2/BORCS6/BORCS5
GO:BP	protein localization to Golgi apparatus	GO:0034067	8/3338	11/12653	0.00173461	0.00604434	0.00324195	Arl5/Arfrp1/Rab6/Rab1/Cog7/Vps13/Arl1/Vps13D
GO:BP	regulation of oxidoreductase activity	GO:0051341	8/3338	11/12653	0.00173461	0.00604434	0.00324195	Sirup/su(f)/levy/Pdp/Fdx1/ecd/CG6179/Fdx2
GO:BP	actin filament capping	GO:0051693	8/3338	11/12653	0.00173461	0.00604434	0.00324195	tmod/LRR/CG31715/cpb/twf/Svil/Gel/cpa
GO:BP	synapse maturation	GO:0060074	8/3338	11/12653	0.00173461	0.00604434	0.00324195	Sac1/ben/Vap33/Nlg2/Pi3K92E/Sec5/mys/shv
GO:BP	presynapse assembly	GO:0099054	8/3338	11/12653	0.00173461	0.00604434	0.00324195	Nlg4/Arl8/Liprin-alpha/Nrx-IV/Nlg2/Nrx-1/Spn/Nlg3
GO:BP	maintenance of vacuolar location	GO:1990849	8/3338	11/12653	0.00173461	0.00604434	0.00324195	Arl8/prd1/Rilpl/CG10681/bchs/Blos2/BORCS6/BORCS5
GO:BP	translational elongation	GO:0006414	17/3338	33/12653	0.0017888	0.0062258	0.00333928	drosha/mEFTs/Clbn/CG1578/Dph3/eEF1delta/mEFG1/Srp9/Dph5/Sbp2/mEFTu2/SecS/CG11414/eEF1gamma/GAPsec/mRpL44/CG4849
GO:BP	protein localization to mitochondrion	GO:0070585	28/3338	64/12653	0.00193811	0.00672948	0.00360943	UQCR-C1/CG31229/CG11779/CG7382/Roe1/OXA1L/CG7639/Pink1/Hsp60A/Tom7/Tim23/CG7394/Tom40/Tom70/Hsc70-5/CG14894/Tim9a/Tim8/CG7791/CG8728/blp/CG8206/mge/CG11110/CG4942/CG1847/CG8531/CG12379
GO:BP	establishment of protein localization to mitochondrion	GO:0072655	28/3338	64/12653	0.00193811	0.00672948	0.00360943	UQCR-C1/CG31229/CG11779/CG7382/Roe1/OXA1L/CG7639/Pink1/Hsp60A/Tom7/Tim23/CG7394/Tom40/Tom70/Hsc70-5/CG14894/Tim9a/Tim8/CG7791/CG8728/blp/CG8206/mge/CG11110/CG4942/CG1847/CG8531/CG12379
GO:BP	cognition	GO:0050890	62/3338	169/12653	0.00194993	0.00676254	0.00362716	Sap47/Nmdar1/mnb/Syn/CASK/futsch/CG4612/shi/14-3-3zeta/dbr/Scamp/svr/spoon/Ptp10D/eag/arm/Abl/sgg/Pink1/Mob2/orb2/Stat92E/sra/Atx2/gry/G9a/drk/Nf1/stau/wcy/Socs36E/CRMP/Blos1/Nrx-1/ATP6AP2/CenG1A/chico/Fmr1/simj/Tbh/vsg/dome/Src64B/DopEcR/pum/lilli/bs/HDAC4/MICU1/Rdl/BOD1/aPKC/kis/Alk/bsk/hop/Fdh/Rac1/hiw/Psn/cer/ebo
GO:BP	purine ribonucleotide biosynthetic process	GO:0009152	40/3338	100/12653	0.00198608	0.00686392	0.00368154	Ac3/Acsl/AMPdeam/blw/AdSS/ATPsyngamma/ATPsynbeta/Pdhb/Scox/ATPsynF/ATPsynD/CLS/Pdha/Adk2/ATPsynCF6/sun/Papss/bur/fbl/Gycbeta100B/CG31183/muc/ATPCL/CG11035/Ac76E/DIP2/Gyc89Da/ras/ATPsyndelta/Ak2/Dpck/Gycalpha99B/ATPsynbetaL/ATPsynE/ATPsynO/ATPsynG/ATPsynC/awd/CG3337/sesB
GO:BP	larval midgut histolysis	GO:0035069	15/3338	28/12653	0.00199554	0.00686392	0.00368154	Atg1/TER94/Uba1/Atg17/raptor/Mdh2/hid/Atg9/Tor/Atg13/Pten/Atg8a/Pi3K59F/Atg18a/rpr
GO:BP	salivary gland cell autophagic cell death	GO:0035071	15/3338	28/12653	0.00199554	0.00686392	0.00368154	hdc/MED24/drpr/Idh3b/l(3)psg2/Atg17/DCAF12/Mdh2/hid/Itpr/Eip74EF/Utx/kto/bel/rpr
GO:BP	regulation of nucleocytoplasmic transport	GO:0046822	15/3338	28/12653	0.00199554	0.00686392	0.00368154	rdx/Abl/sgg/Klp64D/swm/Su(fu)/Rcc1/ZC3H3/Nup154/RanBPM/rempA/Nup358/mbo/Nup98-96/Fs(2)Ket
GO:BP	regulation of lipid biosynthetic process	GO:0046890	15/3338	28/12653	0.00199554	0.00686392	0.00368154	elm/SREBP/Dd/SCAP/schlank/eIF4EHP/adp/CG42233/CG2765/iPLA2-VIA/Fdx1/Pex3/PIP5K59B/Cds/Fdx2
GO:BP	nurse cell apoptotic process	GO:0045476	11/3338	18/12653	0.00199122	0.00686392	0.00368154	E2f1/cathD/Atg1/Dp/Bruce/slmb/Drep1/spin/Nup154/Atg13/Pi3K59F
GO:BP	presynaptic active zone organization	GO:1990709	11/3338	18/12653	0.00199122	0.00686392	0.00368154	Lrp4/Synj/Srpk79D/Liprin-alpha/beta-Spec/Nlg2/Rab3/alpha-Spec/Dys/Spn/SH3PX1
GO:BP	neuroblast proliferation	GO:0007405	39/3338	97/12653	0.00201034	0.00690673	0.0037045	Dap160/loco/Actbeta/baz/tws/Ctr9/Lkb1/Rheb/clu/cnn/msps/Dhc64C/MAGE/Rho1/osa/Fmr1/Apc/flfl/ric8a/mor/Cdc37/mgr/Ggamma1/aPKC/jar/Zif/trol/brm/enok/Pfdn2/Bap60/btd/brat/l(3)mbt/InR/sd/Cdc42/Arl2/zld
GO:BP	dorsal/ventral axis specification	GO:0009950	31/3338	73/12653	0.00204157	0.00700582	0.00375765	loco/orb/flw/cic/Khc/rin/spoon/enc/Dp/milt/Raf/bai/lig/BicD/Parp/Dhc64C/Fmr1/CSN5/spn-A/Cbl/csw/sty/tsu/faf/CkIIalpha/wek/asun/Syp/sll/mus301/jvl
GO:BP	positive regulation of transmembrane transport	GO:0034764	18/3338	36/12653	0.00204641	0.00701422	0.00376216	Hk/elm/qvr/CG6329/eag/stj/Sec61alpha/SERCA/levy/Mvl/Wnk/stol/Stim/CG6454/dysc/CG7781/crok/CG3337
GO:BP	epidermal growth factor receptor signaling pathway	GO:0007173	32/3338	76/12653	0.0020589	0.00704059	0.0037763	Ras85D/Vav/cic/Usp47/Ptp10D/aop/Raf/Mvb12/Graf/Ptp4E/gro/drk/rl/Socs36E/Ptp61F/ebi/Dsor1/Vps4/Src64B/Cbl/pum/csw/RasGAP1/step/mop/cnk/sty/Sulf1/Gug/RhoGAP5A/tay/Rgl
GO:BP	ERBB signaling pathway	GO:0038127	32/3338	76/12653	0.0020589	0.00704059	0.0037763	Ras85D/Vav/cic/Usp47/Ptp10D/aop/Raf/Mvb12/Graf/Ptp4E/gro/drk/rl/Socs36E/Ptp61F/ebi/Dsor1/Vps4/Src64B/Cbl/pum/csw/RasGAP1/step/mop/cnk/sty/Sulf1/Gug/RhoGAP5A/tay/Rgl
GO:BP	cell-cell junction organization	GO:0045216	34/3338	82/12653	0.00207218	0.00707773	0.00379622	loco/baz/Vav/Atpalpha/shi/Rab11/cindr/kirre/arm/Cip4/Nrx-IV/wun/wol/Mcr/Rho1/Cont/Src64B/vari/pasi1/shakB/sns/kune/aPKC/jar/Patj/Rac1/crok/alpha-Cat/awd/RhoGAP5A/GckIII/sinu/pasi2/cora
GO:BP	pyridine nucleotide metabolic process	GO:0019362	13/3338	23/12653	0.00210173	0.0071454	0.00383252	Mdh1/Sik3/Men/Nmnat/cu/Gpdh1/CG8080/Nadsyn/Sarm/CG33156/Naprt/Rpi/Idh
GO:BP	germarium-derived female germ-line cyst formation	GO:0030727	13/3338	23/12653	0.00210173	0.0071454	0.00383252	CSN7/drosha/Sxl/alien/slmb/alpha-Spec/CSN5/NHP2/nsl1/Tor/CSN3/CSN1b/Pdcd4
GO:BP	nicotinamide nucleotide metabolic process	GO:0046496	13/3338	23/12653	0.00210173	0.0071454	0.00383252	Mdh1/Sik3/Men/Nmnat/cu/Gpdh1/CG8080/Nadsyn/Sarm/CG33156/Naprt/Rpi/Idh
GO:BP	establishment of protein localization to vacuole	GO:0072666	13/3338	23/12653	0.00210173	0.0071454	0.00383252	car/Stam/lsn/Vps28/Mon1/Vps37B/Su(dx)/p/mop/Vsp37A/Vps13/Vps8/Vps13D
GO:BP	positive regulation of immune response	GO:0050778	59/3338	160/12653	0.00215546	0.0073196	0.00392595	Cul1/PPP4R2r/TM9SF2/DMAP1/bnl/EMRE/ben/Usp2/tub/IKKepsilon/Herc4/Hr78/scny/puf/hyd/Ntf-2/Parp/Doa/key/slmb/senju/Ubc4/Pli/hep/chico/PDCD-5/Sarm/betaCOP/Etl1/flfl/Traf6/Diap2/Nsun5/CG13994/SkpA/Crag/vvl/lwr/Su(var)2-10/puc/UbcE2M/aub/bsk/mop/smog/Pp1alpha-96A/Aos1/psidin/Pp4-19C/DPCoAC/HBS1/imd/akirin/MED25/Dif/grass/Ide/Ubc7/kay
GO:BP	regulation of tube size, open tracheal system	GO:0035151	23/3338	50/12653	0.00216466	0.00734233	0.00393814	Atpalpha/zip/Sec24CD/garz/deltaCOP/Nrx-IV/stan/gammaCOP/Mcr/kkv/Rho1/chico/mmy/vari/pasi1/sqh/dsh/sano/kune/crok/sinu/pasi2/cora
GO:BP	regulation of neurogenesis	GO:0050767	52/3338	138/12653	0.00225428	0.00763747	0.00409644	Dap160/Actbeta/tws/CadN/atl/hdc/Ctr9/ari-1/aop/unk/sif/nudC/Rheb/GM130/nudE/stan/G9a/Sema2a/slmb/Hs3st-B/Ythdf/MAGE/Sec23/Sar1/osa/barc/Fmr1/Vang/Sema1a/Wnt5/mor/Cdc37/Rcc1/dsh/aPKC/Rab1/Sema1b/DCTN1-p150/SoxN/PlexB/Rac1/trol/brm/Ntan1/Bap60/lva/brat/InR/spas/sd/zld/bif
GO:BP	triglyceride metabolic process	GO:0006641	19/3338	39/12653	0.00228114	0.00771067	0.0041357	FASN1/Lpin/Xbp1/Sik3/Lkb1/CG17646/Dd/crc/Akt/schlank/Gpdh1/Ire1/chico/Hsl/Gk2/Cds/ACC/CG1271/Thor
GO:BP	oocyte dorsal/ventral axis specification	GO:0007310	19/3338	39/12653	0.00228114	0.00771067	0.0041357	loco/orb/flw/cic/Khc/enc/milt/bai/BicD/Dhc64C/Fmr1/CSN5/tsu/CkIIalpha/wek/asun/Syp/sll/jvl
GO:BP	protein targeting to mitochondrion	GO:0006626	25/3338	56/12653	0.0023687	0.00799743	0.00428951	UQCR-C1/CG31229/CG11779/CG7382/Roe1/CG7639/Hsp60A/Tom7/Tim23/CG7394/Tom40/Tom70/Hsc70-5/CG14894/Tim9a/Tim8/CG7791/CG8728/blp/CG8206/mge/CG11110/CG1847/CG8531/CG12379
GO:BP	brain development	GO:0007420	49/3338	129/12653	0.00245286	0.00827207	0.00443682	LpR2/exd/LpR1/Actbeta/hth/CG6083/robo3/RhoGAPp190/Uba1/drosha/mbt/stan/bchs/cib/Eph/Tao/vap/Dmtn/Frl/noc/Dhc64C/PsGEF/Dg/Fmr1/Apc/CG11035/PrBP/Hr3/DAAM/Src64B/Invadolysin/oc/SMC1/vvl/robl/Itpr/bsk/fdl/CG4853/ecd/Dab/twf/enok/robo2/ash2/brat/bwa/lncRNA:let7C/ebo
GO:BP	positive regulation of actin filament polymerization	GO:0030838	10/3338	16/12653	0.00254071	0.00851937	0.00456946	shi/svr/dco/p38b/Lam/LRR/Ssrp/Vrp1/DAAM/Nup98-96
GO:BP	regulation of microtubule depolymerization	GO:0031114	10/3338	16/12653	0.00254071	0.00851937	0.00456946	atl/futsch/Patronin/beta-Spec/alpha-Spec/Apc/tacc/Mnat9/Vhl/spas
GO:BP	intercellular bridge organization	GO:0043063	10/3338	16/12653	0.00254071	0.00851937	0.00456946	flw/cindr/fwd/hts/rngo/kel/Cortactin/pcs/Src64B/Mbs
GO:BP	response to misfolded protein	GO:0051788	10/3338	16/12653	0.00254071	0.00851937	0.00456946	TER94/rdx/sordd1/Ufd1/sordd2/CG3061/Cul3/STUB1/Uggt/CG5199
GO:BP	cellular response to misfolded protein	GO:0071218	10/3338	16/12653	0.00254071	0.00851937	0.00456946	TER94/rdx/sordd1/Ufd1/sordd2/CG3061/Cul3/STUB1/Uggt/CG5199
GO:BP	transcription initiation from RNA polymerase II promoter	GO:0006367	28/3338	65/12653	0.00255985	0.00855421	0.00458815	x16/Taf4/TfIIFbeta/Srp54/caz/Ssb-c31a/TfIIB/Taf10b/Taf11/TfIIA-L/SF2/Sec13/Rpt4/TfIIEbeta/M1BP/skd/Mat1/Trf/ear/Tfb1/TfIIEalpha/Polr2I/MED14/Saf6/Xpd/Taf1/Nup98-96/mrn
GO:BP	phosphatidylinositol biosynthetic process	GO:0006661	28/3338	65/12653	0.00255985	0.00855421	0.00458815	frj/Ipp/fwd/Ttc7/PIG-T/CG9391/GAA1/CG7990/Socs36E/PIG-G/PIG-L/Dpm3/Hyccin/PIG-F/Socs16D/Mppe/PGAP5/Pi3K92E/PIG-K/PIG-S/PIG-Q/PIP5K59B/Cds/rdgA/Pi3K21B/CG7789/Pi3K59F/CG15743
GO:BP	positive regulation of cell motility	GO:2000147	28/3338	65/12653	0.00255985	0.00855421	0.00458815	sli/ths/zip/ena/aop/fra/Sema2a/par-1/slmb/LRR/Akt/hep/chico/Sema1a/Cbl/Pi3K92E/sqh/puc/kis/Sema1b/bsk/Hrs/Rac1/Catsup/Rme-8/robo2/InR/kay
GO:BP	regulation of ion transport	GO:0043269	29/3338	68/12653	0.00259718	0.0086691	0.00464977	Teh1/Hk/Cnx99A/elm/qvr/NKAIN/CG6329/Usp2/Nedd4/eag/stj/Sec61alpha/homer/Fkbp59/SERCA/levy/Mvl/Orai/Wnk/stol/Stim/dysc/Neto/ATPsynbetaL/CG7781/porin/CG3078/crok/CG3337
GO:BP	mRNA polyadenylation	GO:0006378	14/3338	26/12653	0.00263631	0.00877973	0.00470911	orb/Pabp2/bsf/Wdr33/swm/hrg/Fmr1/Cpsf6/ZC3H3/Cpsf73/Cpsf100/Suv3/Pcf11/CG4266
GO:BP	phospholipid transport	GO:0015914	14/3338	26/12653	0.00263631	0.00877973	0.00470911	slmo/scramb1/CG31729/prel/ATP8A/rdgB/CG33298/vib/CDC50/CG13893/CG32485/ScpX/scramb2/CG30109
GO:BP	cell-cell adhesion via plasma-membrane adhesion molecules	GO:0098742	33/3338	80/12653	0.00264332	0.00879308	0.00471627	beat-IIa/CadN/beat-Ib/beat-IIb/Cad87A/beat-Ic/hbs/beat-VI/Fas3/CadN2/beat-Vc/kirre/beat-IIIb/CG7166/stan/Nrt/beat-Va/Cad96Ca/beat-Ia/tutl/Dscam3/CG34353/Cont/glec/sns/mew/caps/CG13506/Dscam2/Bsg/mys/beat-Vb/Con
GO:BP	lumen formation, open tracheal system	GO:0035149	17/3338	34/12653	0.00270713	0.00896471	0.00480832	Rbcn-3A/Dlic/Sac1/Sec24CD/CCT3/garz/gammaCOP/Smn/Dhc64C/kkv/Rho1/Sec23/Rab35/Moe/wkd/DCTN1-p150/Vhl
GO:BP	nucleotide phosphorylation	GO:0046939	17/3338	34/12653	0.00270713	0.00896471	0.00480832	Gapdh1/Pfk/Hex-A/Ald1/PyK/Eno/Pgi/Tpi/Gapdh2/Ak1/Pgk/Pglym78/Dg/dnk/PNKP/awd/CG7059
GO:BP	regulation of protein serine/threonine kinase activity	GO:0071900	17/3338	34/12653	0.00270713	0.00896471	0.00480832	Ccm3/SNF4Agamma/Wee1/Hexim/sgg/fry/raptor/CG30291/Rho1/CG40191/CycY/Pi3K92E/step/Mat1/Cdk7/Rac1/sty
GO:BP	negative regulation of neuron death	GO:1901215	17/3338	34/12653	0.00270713	0.00896471	0.00480832	futsch/aux/Pink1/pix/vimar/dj-1beta/msk/Akt/MAGE/ebi/Naa20A/Fer2/Naam/TBPH/Drep2/psidin/rpr
GO:BP	positive regulation of protein modification by small protein conjugation or removal	GO:1903322	12/3338	21/12653	0.00275465	0.00911176	0.0048872	Cul1/SCCRO/dod/fzr/SCCRO4/Ndfip/SCCRO3/Diap2/STUB1/krz/CG4911/rpr
GO:BP	circadian rhythm	GO:0007623	61/3338	168/12653	0.00278445	0.00919998	0.00493451	Ac3/mnb/Hk/qvr/kairos/nocte/Kdm5/dco/dod/CG5273/inc/Sik3/Mid1/p38b/Ih/homer/Gabat/sgg/Pink1/tara/unc80/Atx2/Nf1/Pdfr/Iswi/slmb/sxc/trsn/na/Cul3/cu/fbl/nej/Akt/Rho1/jet/nvy/Fmr1/unc79/S/dome/dysc/Akap200/Dh44/hid/Rdl/BTBD9/Acer/hop/Rac1/speck/Pdp1/cyc/B4/Fbxl4/CkIIalpha/InR/Mbs/tyf/kay/prod
GO:BP	rRNA processing	GO:0006364	56/3338	152/12653	0.00281287	0.00928343	0.00497927	CG6999/CG4866/drosha/Nopp140/mRpS11/CG1789/CG32706/CG11030/CG2260/CG6724/dbe/Rrp47/CG11123/Non3/CG1463/Mtr4/CG14805/LTV1/Pop5/Trmt112/CG7637/Snp/CG4364/Nop60B/CG32409/CG7275/CG32708/Nsun5/Sas10/Dbp45A/CG6833/CG10903/CG11417/NHP2/Pop4/Rexo5/CG3817/nclb/l(1)G0020/CG15916/kz/pit/CG3735/CG8204/CG4338/CG3008/CG2691/Rrp42/Rrp6/CG6686/CG6712/mRpL44/RpS16/RpLP0-like/CG5728/l(3)72Dn
GO:BP	segmentation	GO:0035282	89/3338	260/12653	0.00283283	0.0093388	0.00500897	Ras85D/hth/baz/capu/orb/Acsl/TER94/dally/cic/fz2/Khc/lgs/lost/Rab11/tud/enc/AGO2/Kdm2/IKKepsilon/Mkrn1/DCTN2-p50/rdx/Raf/arm/sgg/Rop/stan/Stat92E/Doa/Axn/stau/par-1/wol/lsn/DCP2/Pat1/Hs3st-B/msps/rl/SelG/Tm1/Pc/sfl/osa/Ge-1/Dsor1/Dg/Mad/Apc/CG7483/disp/CSN5/Su(dx)/dome/CycC/wls/pum/lilli/csw/spn-F/RasGAP1/oc/Moe/btz/skd/vvl/Syt1/sqh/dsh/Rab6/aPKC/kis/mago/aub/cnk/kto/SoxN/hop/mon2/pygo/nkd/Sry-de…
GO:BP	purine ribonucleotide metabolic process	GO:0009150	64/3338	178/12653	0.00291693	0.00960524	0.00515188	Gapdh1/Pfk/Ac3/Hex-A/Ald1/Pde11/Acsl/PyK/Eno/AMPdeam/blw/AdSS/ATPsyngamma/Pgi/ATPsynbeta/Pdhb/Tpi/Hmgs/Scox/Gapdh2/ATPsynF/Aps/ScsbetaG/Ak1/ATPsynD/CLS/Pgk/Pdha/Adk2/ATPsynCF6/sun/Papss/bur/fbl/Gycbeta100B/CG31183/Pglym78/Vha68-1/muc/Dg/ScsbetaA/ATPCL/CG11035/Ac76E/DIP2/Gyc89Da/ras/ATPsyndelta/Ak2/Dpck/Gycalpha99B/ATPsynbetaL/Hmgcr/ATPsynE/ATPsynO/ATPsynG/ATPsynC/Pmvk/awd/CG3337/sesB/scu/CG7059/M…
GO:BP	mitotic cytokinesis	GO:0000281	23/3338	51/12653	0.00297151	0.00977401	0.0052424	ALiX/shrb/zip/pnut/shi/alphaSnap/Asap/sau/Rho1/Pkn/Rab35/Ocrl/Synd/sqh/Act5C/Rab1/AP-2alpha/Det/CG30183/Act88F/l(2)gd1/Act87E/Act57B
GO:BP	positive regulation of ion transport	GO:0043270	18/3338	37/12653	0.00301336	0.00990056	0.00531028	Hk/elm/qvr/CG6329/eag/stj/Sec61alpha/SERCA/levy/Mvl/Orai/Wnk/stol/Stim/dysc/CG7781/crok/CG3337
GO:BP	regulation of tube size	GO:0035150	24/3338	54/12653	0.00308477	0.0101238	0.00543004	Atpalpha/zip/Sec24CD/garz/deltaCOP/raw/Nrx-IV/stan/gammaCOP/Mcr/kkv/Rho1/chico/mmy/vari/pasi1/sqh/dsh/sano/kune/crok/sinu/pasi2/cora
GO:BP	purine-containing compound biosynthetic process	GO:0072522	47/3338	124/12653	0.00311843	0.0102229	0.00548315	Ac3/Acsl/AMPdeam/blw/AdSS/ATPsyngamma/ATPsynbeta/Pdhb/Scox/ATPsynF/Adk3/Nmnat/ATPsynD/CLS/Pdha/Adk2/ATPsynCF6/sun/Papss/bur/fbl/Gycbeta100B/CG31183/muc/ATPCL/Nadsyn/CG11035/CG33156/Ac76E/DIP2/Gyc89Da/ras/ATPsyndelta/CG2246/Ak2/Dpck/Gycalpha99B/Naprt/ATPsynbetaL/Pgm2a/ATPsynE/ATPsynO/ATPsynG/ATPsynC/awd/CG3337/sesB
GO:BP	vesicle docking involved in exocytosis	GO:0006904	15/3338	29/12653	0.00313471	0.0102305	0.00548726	CASK/Syx13/Rop/nSyb/Rab3/Exo84/Syx6/Sec10/Sec5/Syx17/Syx8/Rab8/Sec6/Snap25/Sec8
GO:BP	lysosomal transport	GO:0007041	15/3338	29/12653	0.00313471	0.0102305	0.00548726	comt/TSG101/Arl8/Mvb12/car/Vps16A/Mon1/Vamp7/Su(dx)/ema/p/spin/Vps52/Rab7/Lerp
GO:BP	regulation of axon extension	GO:0030516	15/3338	29/12653	0.00313471	0.0102305	0.00548726	CadN/atl/Liprin-alpha/stan/Sema2a/Ythdf/Fmr1/Vang/Sema1a/Wnt5/dsh/Sema1b/Rac1/spas/bif
GO:BP	regulation of extent of cell growth	GO:0061387	15/3338	29/12653	0.00313471	0.0102305	0.00548726	CadN/atl/Liprin-alpha/stan/Sema2a/Ythdf/Fmr1/Vang/Sema1a/Wnt5/dsh/Sema1b/Rac1/spas/bif
GO:BP	salivary gland morphogenesis	GO:0007435	37/3338	93/12653	0.00320009	0.0104117	0.00558446	hdc/zip/shi/fz2/MED24/drosha/drpr/trh/sigmar/Idh3b/deltaCOP/raw/jeb/gammaCOP/l(3)psg2/Atg17/Rho1/DCAF12/Mdh2/Src64B/Wnt5/hid/dsh/Itpr/Eip74EF/mew/caps/Utx/kto/Rac1/bel/dnt/AdamTS-A/Drl-2/Dif/rpr/Mtl
GO:BP	gland morphogenesis	GO:0022612	37/3338	93/12653	0.00320009	0.0104117	0.00558446	hdc/zip/shi/fz2/MED24/drosha/drpr/trh/sigmar/Idh3b/deltaCOP/raw/jeb/gammaCOP/l(3)psg2/Atg17/Rho1/DCAF12/Mdh2/Src64B/Wnt5/hid/dsh/Itpr/Eip74EF/mew/caps/Utx/kto/Rac1/bel/dnt/AdamTS-A/Drl-2/Dif/rpr/Mtl
GO:BP	protein monoubiquitination	GO:0006513	9/3338	14/12653	0.00321153	0.0104117	0.00558446	ari-1/CG10254/Bre1/wcy/l(3)73Ah/Cbl/CG7220/Su(z)2/Sce
GO:BP	negative regulation of microtubule polymerization or depolymerization	GO:0031111	9/3338	14/12653	0.00321153	0.0104117	0.00558446	Patronin/beta-Spec/Efa6/alpha-Spec/Apc/tacc/Mnat9/Vhl/spas
GO:BP	regulation of actin nucleation	GO:0051125	9/3338	14/12653	0.00321153	0.0104117	0.00558446	nwk/SCAR/Cip4/Naus/LRR/Cortactin/PICK1/Arfip/Strump
GO:BP	synaptic vesicle endosomal processing	GO:0099532	9/3338	14/12653	0.00321153	0.0104117	0.00558446	Dap160/shi/lap/Synj/EndoA/Blos1/Rab35/Rab5/Syt1
GO:BP	rhythmic process	GO:0048511	61/3338	169/12653	0.0032558	0.0105436	0.00565519	Ac3/mnb/Hk/qvr/kairos/nocte/Kdm5/dco/dod/CG5273/inc/Sik3/Mid1/p38b/Ih/homer/Gabat/sgg/Pink1/tara/unc80/Atx2/Nf1/Pdfr/Iswi/slmb/sxc/trsn/na/Cul3/cu/fbl/nej/Akt/Rho1/jet/nvy/Fmr1/unc79/S/dome/dysc/Akap200/Dh44/hid/Rdl/BTBD9/Acer/hop/Rac1/speck/Pdp1/cyc/B4/Fbxl4/CkIIalpha/InR/Mbs/tyf/kay/prod
GO:BP	hemopoiesis	GO:0030097	35/3338	87/12653	0.00328675	0.0105971	0.00568386	Ras85D/E2f1/Marf/ths/chb/C1GalTA/Raf/ytr/Stat92E/Tnpo/rl/Syx5/nej/Rho1/CSN5/Pi3K92E/Gale/lwr/GlyRS/sn/CTPsyn/Drp1/hop/Tor/Zif/Rac1/Pten/sty/Zfrp8/mys/spas/mxc/Cdc42/Mtl/Nup98-96
GO:BP	snRNA metabolic process	GO:0016073	19/3338	40/12653	0.00328334	0.0105971	0.00568386	bin3/CG7637/omd/IntS10/IntS9/Nop60B/CycC/IntS6/IntS1/NHP2/Zcchc7/Ski6/IntS2/CG16790/asun/IntS12/Rrp42/Rrp6/Cdk8
GO:BP	negative regulation of cellular response to growth factor stimulus	GO:0090288	19/3338	40/12653	0.00328334	0.0105971	0.00568386	Lpin/anchor/Ptp10D/Dad/Ptp4E/Tao/Dd/vap/cv/Ptp61F/nord/RasGAP1/spin/Cul2/MAN1/trol/hiw/sty/PRAS40
GO:BP	positive regulation of border follicle cell migration	GO:1903688	19/3338	40/12653	0.00328334	0.0105971	0.00568386	zip/aop/par-1/slmb/Akt/hep/chico/Cbl/Pi3K92E/sqh/puc/kis/bsk/Hrs/Rac1/Catsup/Rme-8/InR/kay
GO:BP	negative regulation of macromolecule biosynthetic process	GO:0010558	137/3338	424/12653	0.00332359	0.0107041	0.00574125	E2f1/orb/Larp4B/scrt/DMAP1/cic/CG12236/gcl/Pop2/Pabp2/ct/bsf/aop/CG3662/Rga/Not1/Sxl/Su(var)205/arm/bin3/CG9776/Hexim/Pink1/orb2/alien/Wdr82/Eip78C/gro/Kdm4B/G9a/Iswi/escl/Nulp1/Ssb-c31a/DCP2/CG14073/noc/Smr/Sirt1/twin/PAN2/CG32767/CG10631/CG12605/Pc/Ythdf/Mnt/CG4360/ebi/Ge-1/nvy/Mad/Blimp-1/Fmr1/simj/larp/Srp9/pho/eIF4EHP/Pcl/ph-d/Asx/CG14220/Hr3/HDAC6/CG12384/CG2199/CG3847/pum/Su(var)3-3/oc/Sap…
GO:BP	translational initiation	GO:0006413	30/3338	72/12653	0.0033795	0.0108722	0.00583142	mxt/eIF5/eIF3j/CG8963/Sxl/eIF4E1/eIF4H1/eIF3a/pix/mRpL49/eIF3d1/CG5726/eIF2beta/eIF4EHP/eIF2Balpha/mIF2/eIF2alpha/eIF3g1/eIF4G1/NAT1/eIF2Bbeta/MCTS1/eIF2gamma/CG31957/eIF3h/eIF1A/eIF5B/eIF2Bgamma/Thor/eIF3b
GO:BP	RNA catabolic process	GO:0006401	50/3338	134/12653	0.00341438	0.0109724	0.00588517	Rat1/Dora/Pop2/Tudor-SN/Pabp2/bsf/Rga/Not1/pix/Wdr82/DCP2/CG2124/twin/PAN2/CG13850/Ythdf/Mtr4/Ire1/Ge-1/Fmr1/Trf4-1/Upf2/pum/Smg5/LSm7/roq/Not3/Rcd-1/Smg6/Rai1/Cbp80/aub/RNaseX25/Zcchc7/Patr-1/DIP1/Edc3/CG42458/Suv3/Ski6/CG30105/smg/rnh1/pelo/PAN3/Rrp42/Rrp6/mbf1/RpLP0-like/LSm1
GO:BP	phosphatidylinositol 3-kinase signaling	GO:0014065	13/3338	24/12653	0.00348671	0.0111438	0.00597711	Cul1/Atg1/Lpin/dj-1beta/Cad96Ca/Ptp61F/chico/Pi3K92E/step/Pten/Pi3K21B/InR/Atg18a
GO:BP	snRNA processing	GO:0016180	13/3338	24/12653	0.00348671	0.0111438	0.00597711	omd/IntS10/IntS9/CycC/IntS6/IntS1/Ski6/IntS2/CG16790/asun/IntS12/Rrp42/Cdk8
GO:BP	regulation of heterochromatin assembly	GO:0031445	13/3338	24/12653	0.00348671	0.0111438	0.00597711	Usp7/wde/Su(var)205/Ulp1/Stat92E/bur/Su(var)3-3/Acf/lwr/Mekk1/hop/Bap60/CoRest
GO:BP	cellular component maintenance	GO:0043954	13/3338	24/12653	0.00348671	0.0111438	0.00597711	shi/Synj/Rab11/beta-Spec/Nmnat/Nlg2/Rab3/Rho1/alpha-Spec/Dys/PICK1/jar/Patj
GO:BP	regulation of heterochromatin organization	GO:0120261	13/3338	24/12653	0.00348671	0.0111438	0.00597711	Usp7/wde/Su(var)205/Ulp1/Stat92E/bur/Su(var)3-3/Acf/lwr/Mekk1/hop/Bap60/CoRest
GO:BP	epithelial cell migration, open tracheal system	GO:0007427	20/3338	43/12653	0.00351715	0.0112045	0.00600964	sli/Ras85D/dally/bnl/shi/Raf/Sdc/Stam/drk/Akt/sfl/csw/cnk/Hrs/Catsup/awd/robo2/Vhl/Pu/AdamTS-A
GO:BP	amino acid activation	GO:0043038	20/3338	43/12653	0.00351715	0.0112045	0.00600964	ThrRS/TyrRS/GatA/AspRS-m/TrpRS/AlaRS/CysRS-m/alpha-PheRS/SerRS/LeuRS/TyrRS-m/TrpRS-m/GlyRS/IleRS/GatB/AsnRS/Slimp/PheRS-m/ArgRS/ArgRS-m
GO:BP	positive regulation of translation	GO:0045727	20/3338	43/12653	0.00351715	0.0112045	0.00600964	Larp4B/mxt/CG4612/spoon/Mkrn1/Dp1/Rheb/orb2/La/Fmr1/larp/rswl/CG3862/Pi3K92E/pum/Dph5/aub/Hrb98DE/Suv3/tyf
GO:BP	regulation of neurotransmitter secretion	GO:0046928	16/3338	32/12653	0.00358599	0.011399	0.006114	Frq1/CASK/Frq2/Syt4/Ih/BicD/NFAT/Rab3/Rab3-GAP/Dys/Rab3GAP1/cpx/Mctp/mop/Cdc42/SH3PX1
GO:BP	regulation of neurotransmitter transport	GO:0051588	16/3338	32/12653	0.00358599	0.011399	0.006114	Frq1/CASK/Frq2/Syt4/Ih/BicD/NFAT/Rab3/Rab3-GAP/Dys/Rab3GAP1/cpx/Mctp/mop/Cdc42/SH3PX1
GO:BP	positive regulation of protein ubiquitination	GO:0031398	11/3338	19/12653	0.00360779	0.0114312	0.00613124	Cul1/SCCRO/dod/fzr/SCCRO4/Ndfip/SCCRO3/Diap2/STUB1/CG4911/rpr
GO:BP	negative regulation of neuron apoptotic process	GO:0043524	11/3338	19/12653	0.00360779	0.0114312	0.00613124	futsch/Pink1/pix/msk/MAGE/ebi/Naa20A/Naam/TBPH/psidin/rpr
GO:BP	negative regulation of synaptic transmission	GO:0050805	11/3338	19/12653	0.00360779	0.0114312	0.00613124	jeb/Nmnat/Nlg2/Akt/Nadsyn/dysc/Rdl/Alk/Fbxl4/spas/TkR99D
GO:BP	regulation of mitochondrion organization	GO:0010821	21/3338	46/12653	0.00371603	0.0117487	0.00630157	QIL1/Marf/SREBP/Tango9/spoon/Sod2/mRpL12/Pink1/CG9231/vimar/larp/Sps1/CG9855/pn/mask/Miga/Drp1/Pgam5/sesB/Miro/mtSSB
GO:BP	regulation of lipid storage	GO:0010883	21/3338	46/12653	0.00371603	0.0117487	0.00630157	Acsl/elm/FASN1/zetaCOP/CG5946/deltaCOP/SERCA/gammaCOP/Grasp65/Akt/adp/betaCOP/Pi3K92E/Itpr/Atf3/Pten/Cds/alphaCOP/Pi3K21B/InR/ca
GO:BP	mRNA transport	GO:0051028	22/3338	49/12653	0.00388194	0.0122469	0.00656876	Dlic/DCTN2-p50/BicD/CG18259/CG9915/Fmr1/CG6961/Nxt1/Nup93-2/tho2/ZC3H3/tex/Cbp80/DCTN1-p150/Ref1/thoc6/Sem1/mbo/e(y)2/Nup75/thoc7/ncd
GO:BP	regulation of microtubule cytoskeleton organization	GO:0070507	22/3338	49/12653	0.00388194	0.0122469	0.00656876	atl/futsch/Patronin/sigmar/chb/beta-Spec/sgg/Efa6/BicD/Lam/cnn/msps/alpha-Spec/Apc/Eb1/tacc/TBPH/mv/Mnat9/Vhl/spas/ncd
GO:BP	regulation of cellular amide metabolic process	GO:0034248	84/3338	246/12653	0.00393774	0.0124096	0.00665603	l(3)80Fj/orb/Larp4B/mxt/CG4612/Pop2/Xbp1/Pabp2/spoon/eIF3j/bsf/Rga/Mkrn1/CG8963/Sik3/Dp1/Not1/Sxl/Rheb/mEFTs/eIF4E1/bin3/eIF3a/Gabat/Pink1/orb2/CG1578/Ntf-2/Parp/Atx2/La/stau/key/DCP2/peng/twin/Dph3/PAN2/Ythdf/Ge-1/eIF3d1/CG5726/Fmr1/larp/sip3/Srp9/eIF4EHP/rswl/eIF4G1/CG3862/Pi3K92E/pum/Dph5/Sbp2/Diap2/iPLA2-VIA/roq/Not3/Rcd-1/vvl/SecS/aub/Patr-1/Pex3/Hrb98DE/smog/GAPsec/Suv3/smg/4E-T/imd/Zfrp8/b…
GO:BP	nuclear-transcribed mRNA catabolic process, deadenylation-dependent decay	GO:0000288	17/3338	35/12653	0.00398525	0.012472	0.0066895	Pop2/Pabp2/Rga/Not1/DCP2/twin/PAN2/Ge-1/pum/roq/Not3/aub/Patr-1/smg/PAN3/Rrp42/LSm1
GO:BP	adherens junction organization	GO:0034332	17/3338	35/12653	0.00398525	0.012472	0.0066895	baz/Vav/shi/Rab11/cindr/kirre/arm/Cip4/Rho1/Src64B/sns/aPKC/Patj/Rac1/alpha-Cat/awd/RhoGAP5A
GO:BP	positive regulation of ion transmembrane transport	GO:0034767	17/3338	35/12653	0.00398525	0.012472	0.0066895	Hk/elm/qvr/CG6329/eag/stj/Sec61alpha/SERCA/levy/Mvl/Wnk/stol/Stim/dysc/CG7781/crok/CG3337
GO:BP	salivary gland histolysis	GO:0035070	17/3338	35/12653	0.00398525	0.012472	0.0066895	hdc/MED24/drosha/drpr/Idh3b/l(3)psg2/Atg17/DCAF12/Mdh2/hid/Itpr/Eip74EF/Utx/kto/bel/Dif/rpr
GO:BP	protein insertion into membrane	GO:0051205	17/3338	35/12653	0.00398525	0.012472	0.0066895	CG31229/EMC8-9/EMC1/OXA1L/CG7639/Tom7/Tom70/CG10674/EMC6/Tim9a/Tim8/EMC4/mge/CG32022/CG4942/EMC3/CG9853
GO:BP	negative regulation of microtubule depolymerization	GO:0007026	8/3338	12/12653	0.00400006	0.012472	0.0066895	Patronin/beta-Spec/alpha-Spec/Apc/tacc/Mnat9/Vhl/spas
GO:BP	regulation of actin filament depolymerization	GO:0030834	8/3338	12/12653	0.00400006	0.012472	0.0066895	tmod/LRR/CG31715/cpb/twf/Svil/Gel/cpa
GO:BP	regulation of Rab protein signal transduction	GO:0032483	8/3338	12/12653	0.00400006	0.012472	0.0066895	CG18659/Gapvd1/Rab3GAP1/pns/Crag/Sbf/Rab3-GEF/ca
GO:BP	germarium-derived cystoblast division	GO:0048142	8/3338	12/12653	0.00400006	0.012472	0.0066895	CSN7/Sxl/alien/CSN5/NHP2/Tor/CSN3/CSN1b
GO:BP	regulation of ubiquitin-protein transferase activity	GO:0051438	8/3338	12/12653	0.00400006	0.012472	0.0066895	CG6966/SCCRO/fzr/Nedd8/SCCRO4/SCCRO3/Fem-1/Rca1
GO:BP	cellular calcium ion homeostasis	GO:0006874	23/3338	52/12653	0.0040172	0.0125122	0.00671104	Cbp53E/CG1090/CG10470/EMRE/Nckx30C/CG42542/SPoCk/SERCA/PMCA/emei/Stim/SelG/MICU3/CG10362/CG17593/MICU1/RyR/Itpr/CG11367/anne/sesB/zyd/scaf6
GO:BP	ion transmembrane transport	GO:0034220	103/3338	310/12653	0.00402721	0.01253	0.00672062	nAChRalpha3/Hk/nAChRalpha2/Cnx99A/Vha26/CG1090/elm/blw/Atpalpha/qvr/EMRE/kcc/Nckx30C/ATPsynbeta/VhaSFD/CG42542/CG43066/Nhe2/CG6329/nrv3/SPoCk/mfrn/ATPsynF/Nedd4/eag/Mid1/OtopLc/CG15270/nAChRalpha4/stj/Sec61alpha/ABCB7/Ih/SERCA/ND-20/Ctr1A/levy/Vha44/VhaAC39-1/Zip99C/SK/ATPsynD/PMCA/Mvl/Fer1HCH/ATPsynCF6/Orai/sun/Wnk/Ostgamma/stol/CG10353/Stim/CG4239/sei/MICU3/Vha36-1/CG1824/Lcch3/Nhe1/ATP6AP2/Vha…
GO:BP	positive regulation of response to external stimulus	GO:0032103	63/3338	177/12653	0.00408546	0.0126978	0.00681062	sli/Cul1/atl/PPP4R2r/TM9SF2/DMAP1/bnl/EMRE/ben/Usp2/drpr/tub/IKKepsilon/Herc4/Hr78/scny/puf/hyd/Ntf-2/Parp/Doa/Npc2a/key/slmb/senju/Akt/Ubc4/Pli/hep/PDCD-5/Sarm/betaCOP/Etl1/flfl/Traf6/Diap2/Nsun5/CG13994/SkpA/Crag/vvl/lwr/Su(var)2-10/puc/UbcE2M/aub/bsk/mop/smog/Pp1alpha-96A/Aos1/Pp4-19C/DPCoAC/HBS1/imd/akirin/spas/MED25/Dif/grass/Ide/Ubc7/kay
GO:BP	embryonic pattern specification	GO:0009880	80/3338	233/12653	0.00409427	0.0127036	0.00681369	Ras85D/loco/hth/baz/capu/orb/TER94/dally/cic/fz2/Khc/lgs/lost/Rab11/tud/enc/AGO2/IKKepsilon/Mkrn1/DCTN2-p50/Ssdp/rdx/Raf/arm/sgg/Rop/stan/Stat92E/Doa/Axn/stau/par-1/lsn/DCP2/Pat1/msps/rl/SelG/Tm1/Pc/sfl/Ge-1/Dsor1/Dg/Mad/Apc/CG7483/disp/CSN5/dome/wls/twe/pum/lilli/csw/spn-F/RasGAP1/oc/Moe/btz/Syt1/sqh/dsh/Rab6/aPKC/kis/mago/aub/cnk/SoxN/hop/mon2/pygo/nkd/Sry-delta/tsu/papi/Gug/btd/Pu
GO:BP	sleep	GO:0030431	35/3338	88/12653	0.00409596	0.0127036	0.00681369	Calr/Hk/Nlg4/qvr/CG6329/inc/Sik3/Nedd8/nAChRalpha4/Ih/homer/Men/tara/sra/Nf1/trsn/CanB2/Cul3/Pp2B-14D/Fmr1/rogdi/bs/CG7781/Rdl/BTBD9/Acer/GABA-B-R3/crok/speck/cyc/Fbxl4/Shaw/InR/VGAT/cv-c
GO:BP	calcium ion homeostasis	GO:0055074	24/3338	55/12653	0.00412432	0.012778	0.00685362	Cbp53E/Nmdar1/CG1090/CG10470/EMRE/Nckx30C/CG42542/SPoCk/SERCA/PMCA/emei/Stim/SelG/MICU3/CG10362/CG17593/MICU1/RyR/Itpr/CG11367/anne/sesB/zyd/scaf6
GO:BP	lipid homeostasis	GO:0055088	34/3338	85/12653	0.00415602	0.012858	0.00689652	LpR1/FASN1/Lpin/SREBP/SNF4Agamma/Aps/Sik3/Rheb/S6k/Lamtor1/Npc2a/Npc1a/Sap-r/AdipoR/Fatp1/wrd/ktub/fbl/Akt/Egm/hep/Ire1/chico/ACOX1/Pi3K92E/ORMDL/iPLA2-VIA/Itpr/puml/Atf3/Pten/Hr96/CG17841/InR
GO:BP	selective autophagy	GO:0061912	14/3338	27/12653	0.0041589	0.012858	0.00689652	Atg1/AMPKalpha/Atg3/GlyS/Rheb/ref(2)P/Atg17/Atg14/Atg9/Atg13/Aduk/Lamp1/Vps13D/Atg18a
GO:BP	regulation of metal ion transport	GO:0010959	25/3338	58/12653	0.00420586	0.0129895	0.00696705	Teh1/Hk/Cnx99A/elm/qvr/NKAIN/CG6329/Usp2/Nedd4/eag/stj/Sec61alpha/homer/Fkbp59/SERCA/Mvl/Orai/Wnk/stol/Stim/Neto/CG7781/porin/CG3078/crok
GO:BP	cell fate commitment	GO:0045165	107/3338	324/12653	0.00422814	0.0130446	0.00699659	Ras85D/loco/exd/Actbeta/hth/baz/tws/ths/fz2/gcl/14-3-3zeta/rin/Patronin/Rab11/enc/Usp47/drosha/aop/trh/lqf/Lkb1/Raf/arm/jeb/nudE/mam/Sara/BicD/hts/drk/stau/Tao/par-1/clu/Fur2/spg/noc/cnn/msps/Sirt1/msk/rl/Dhc64C/Socs36E/Cul3/nej/CG9849/alpha-Spec/osa/Dsor1/Gmd/Mad/O-fut1/Blimp-1/Fmr1/simj/Apc/S/Asx/pcs/flfl/mask/da/alph/Src64B/spn-A/Wnt5/Cbl/csw/RasGAP1/oc/Klp10A/cdi/skd/mgr/Ptpa/Ggamma1/CG9650/a…
GO:BP	SCF-dependent proteasomal ubiquitin-dependent protein catabolic process	GO:0031146	26/3338	61/12653	0.00426431	0.0131423	0.00704904	Cul1/CG11658/CG9003/CG12402/Kdm2/RYBP/dmpd/CG7148/CG2247/slmb/CG5961/pall/jet/Cul5/Fsn/SkpA/Cul2/CG13085/morgue/CG5003/CG4911/Fbxl4/CG34025/Rca1/CG33969/CG32085
GO:BP	tRNA aminoacylation for protein translation	GO:0006418	18/3338	38/12653	0.00433146	0.0133353	0.00715252	ThrRS/TyrRS/AspRS-m/TrpRS/AlaRS/CysRS-m/alpha-PheRS/SerRS/LeuRS/TyrRS-m/TrpRS-m/GlyRS/IleRS/AsnRS/Slimp/PheRS-m/ArgRS/ArgRS-m
GO:BP	anterior/posterior axis specification	GO:0009948	57/3338	158/12653	0.00439968	0.0135311	0.00725755	Ras85D/baz/capu/orb/TER94/cic/Khc/lost/Rab11/tud/enc/IKKepsilon/Mkrn1/DCTN2-p50/Raf/Rop/stau/par-1/lsn/DCP2/Pat1/msps/rl/Tm1/Pc/Ge-1/Dsor1/Dg/pho/Pcl/CG7483/Asx/CSN5/spn-A/pum/csw/spn-F/RasGAP1/oc/Moe/btz/Syt1/sqh/Rab6/aPKC/mago/aub/cnk/mon2/Sry-delta/tsu/papi/asun/Sce/mus301/Scm/jvl
GO:BP	chromosome organization	GO:0051276	111/3338	338/12653	0.00441373	0.0135349	0.00725958	tws/Usp7/Cul1/gammaTub23C/Arl8/wde/luna/scf/Kdm5/Cdc27/enc/DCTN2-p50/chb/Dp1/Su(var)205/Ulp1/dmt/ZAP3/nudE/cal1/sgg/mam/Stat92E/Nap1/Parp/sau/slmb/Rpn10/Smn/msps/Dhc64C/wrd/bur/SRPK/Su(var)2-HP2/CG31687/cav/HipHop/Mad1/pho/RecQ5/kel/Nnf1a/Top2/Eb1/Sec13/Blm/Src64B/Mau2/CG2199/spn-A/Rae1/Invadolysin/Su(var)3-3/Moe/Klp10A/Ddx1/SMC1/SA/SkpA/CG15237/mgr/Nup50/Su(var)2-10/Cap-D3/aub/pds5/DCTN1-p150/vt…
GO:BP	blastoderm segmentation	GO:0007350	75/3338	217/12653	0.00441475	0.0135349	0.00725958	Ras85D/hth/baz/capu/orb/TER94/dally/cic/fz2/Khc/lgs/lost/Rab11/tud/enc/AGO2/IKKepsilon/Mkrn1/DCTN2-p50/rdx/Raf/arm/sgg/Rop/stan/Stat92E/Doa/Axn/stau/par-1/lsn/DCP2/Pat1/msps/rl/SelG/Tm1/Pc/sfl/Ge-1/Dsor1/Dg/Mad/Apc/CG7483/disp/CSN5/dome/wls/pum/lilli/csw/spn-F/RasGAP1/oc/Moe/btz/Syt1/sqh/dsh/Rab6/aPKC/kis/mago/aub/cnk/SoxN/hop/mon2/pygo/nkd/Sry-delta/tsu/papi/btd
GO:BP	positive regulation of immune system process	GO:0002684	61/3338	171/12653	0.00440906	0.0135349	0.00725958	Ras85D/Cul1/PPP4R2r/TM9SF2/DMAP1/bnl/EMRE/ben/Usp2/tub/IKKepsilon/Herc4/Hr78/scny/puf/hyd/Ntf-2/Parp/Doa/key/slmb/senju/Ubc4/Pli/hep/chico/PDCD-5/Sarm/betaCOP/Etl1/flfl/Traf6/Pi3K92E/Diap2/Nsun5/CG13994/SkpA/Crag/vvl/lwr/Su(var)2-10/puc/UbcE2M/aub/bsk/mop/smog/Pp1alpha-96A/Aos1/psidin/Pp4-19C/DPCoAC/HBS1/imd/akirin/MED25/Dif/grass/Ide/Ubc7/kay
GO:BP	non-membrane-bounded organelle assembly	GO:0140694	81/3338	237/12653	0.00445544	0.0136454	0.00731885	tws/Wdr62/tmod/zip/CG6999/SREBP/rin/mRpL20/chb/Nedd4/SelR/mRpS11/Wee1/CG32706/wac/cal1/P32/Actn/Atx2/hts/emb/tral/CCT6/sau/stau/slmb/CG32262/Lam/CG32425/DCP2/C3G/Smn/cnn/CanB2/Dhc64C/Pp2A-29B/Non3/CG7488/SRPK/Rcd1/CG17493/Ge-1/CG33158/Dg/larp/mRpS7/Eb1/Synd/DAAM/mask/Grip84/Klp10A/CG32708/mgr/Grip163/Cp110/mop/DCTN1-p150/Det/Patr-1/Nup154/spdi/RpS5b/Edc3/Act88F/Mnat9/Bsg/CG7006/CG13185/mys/Vhl/Ce…
GO:BP	snRNA 3'-end processing	GO:0034472	12/3338	22/12653	0.00461703	0.0140815	0.00755276	omd/IntS9/CycC/IntS6/IntS1/Ski6/IntS2/CG16790/asun/IntS12/Rrp42/Cdk8
GO:BP	regulation of neuron apoptotic process	GO:0043523	12/3338	22/12653	0.00461703	0.0140815	0.00755276	TER94/futsch/Pink1/pix/msk/MAGE/ebi/Naa20A/Naam/TBPH/psidin/rpr
GO:BP	positive regulation of lipid metabolic process	GO:0045834	12/3338	22/12653	0.00461703	0.0140815	0.00755276	elm/Dd/schlank/Atg14/eIF4EHP/iPLA2-VIA/Fdx1/Pex3/PIP5K59B/Cds/spas/Fdx2
GO:BP	regulation of axon guidance	GO:1902667	12/3338	22/12653	0.00461703	0.0140815	0.00755276	AMPKalpha/Rheb/S6k/stan/raptor/mmy/Vang/Sema1a/Wnt5/dsh/Tor/Rac1
[truncated: 533 more rows]

## Sheet: Cluster B
source	term_name	term_id	GeneRatio	BgRatio	pvalue	p.adjust < 0.05	qvalue	geneID
[truncated: 1,775 more rows]

## Sheet: Cluster C
source	term_name	term_id	GeneRatio	BgRatio	pvalue	p.adjust < 0.05	qvalue	geneID
GO:MF	structural constituent of ribosome	GO:0003735	24/353	289/12393	2.67703e-06	0.00112435	0.000997546	mRpL20/RpL18A/mRpL3/mRpS33/RpL39/CG4866/RpS21/RpL37a/RpL3/mRpL12/RpL23/mRpS25/mRpL33/RpL34b/mRpL21/mRpL50/RpS7/mRpL24/RpS5a/mRpL41/drosha/sta/mRpS28/RpS4
[truncated: 368 more rows]
