# Supplementary material for: A memory transcriptome time course reveals essential long-term memory transcription factors.
Source: Research Square preprint supplement (doi:10.21203/rs.3.rs-5746840/v1), 2025-01-08
Supplement: Supplementary file 5 [file b4470dabe0fcde7e0c13ea12.xlsx]

## Sheet: TIG overlap summary
Training induced genes (TIG)
333	423	815
MB Only	MBWH (Overlap)	WH Only
sls	FASN1	ACC
trpl	SERCA	Mhc
Svil	CG9674	Xrp1
blw	Argk	ATPCL
Nc73EF	AcCoAS	cv-c
CG46385	EbpIII	scyl
Sarm	PCB	Chc
CG43078	Men	CG9297
cnc	CG4577	Tep4
Acsl	Eno	emp
ATPsynbeta	mAcon1	CG8036
CG18135	PyK	prage
CAP	fry	CG31729
Lpin	kdn	Inos
CG31689	GlyP	cathD
Strn-Mlck	Idh	Atg1
Nuak1	Gpdh1	up
Gapdh1	CLIP-190	Map205
Pde11	shn	Usp32
Eaat1	spin	sws
SREBP	Pdk1	Letm1
Zasp52	CG7920	Sccpdh1
CG1640	vir-1	CG1607
SdhA	svr	Dlg5
Unc-89	DOR	RasGAP1
ND-75	Gdh	wupA
CG2082	CG3036	Klp98A
dnr1	Dp1	Tm2
tacc	UQCR-C1	Ubi-p63E
Pfk	Ttd14	sev
UQCR-C2	Pino	egl
CG11073	CG6910	AOX3
Nedd4	cwo	CG8485
CG30069	snu	CG31694
CG4928	CG10737	CG9485
foxo	CG43658	cdm
bdl	bel	ALiX
CG31038	CG33970	CG9336
Mrtf	CG9005	Mvl
Ncc69	Treh	NimB2
CG17646	Pli	Hsf
nrv2	Diap1	ine
how	Mlc2	Gfat1
CG41520	Hr38	Mlc1
axo	CG40006	cv-2
uzip	dsx	CAH2
CG17549	CG14186	CG7120
baz	SCaMC	Tmem63
Fhos	Cpr	CG45076
CG5455	Atf3	rdog
aralar1	sty	ScpX
CG44085	cact	CG8839
ap	CG32369	Dic1
FER	CG7720	Reg-5
nrv1	sbm	Mdr49
svp	CG5151	Mlp60A
ATPsyngamma	Vps13	CG7115
CG5214	Aldh-III	MTF-1
VhaSFD	Kr-h1	RhoGAP15B
if	raw	CG7778
CG6040	puc	l(2)k01209
CG42673	Pmp70	CG8399
Pax	bon	CG9572
pio	MESR3	Snp
CG2841	CG1648	SdhC
ClC-a	CG32425	c12.2
CG8547	CG42672	CTPsyn
CG13124	Sik3	CG1441
CG5028	cher	Spg7
Pgk	oys	Pex5
SdhB	D2hgdh	Mgstl
Vha68-2	Actn	CG4239
Rgk3	Zasp66	Rpn9
CG5867	AANAT1	CCT7
Fum1	Prm	kraken
Naprt	Pect	Sp7
RtGEF	CG15096	Dip-C
Npl4	Lsd-1	CG6236
uif	muc	Sugb
CG33978	GstD1	CG14830
CG1673	S6k	CG17919
l(3)05822	Gclc	CG11200
TM9SF2	Pura	Hsc70-1
CG32547	CG5973	CG7724
Mtpbeta	Cyp4d21	CG31886
CG12065	CG10237	CG6201
Pkcdelta	CG3764	CG15279
Tab2	CG2865	Grik
CG15186	Gpo1	Obp19b
tup	CG14207	poly
Mlc-c	ELOVL	Fatp2
CG8180	ND-49	Gadd45
CG12290	CG2201	meso18E
Hil	Obp56d	lbm
sqa	CG10345	CG11425
CG33521	Mtpalpha	TpnC41C
Edem1	CG31324	CG1143
DCX-EMAP	CG13315	yellow-c
CG44245	lbk	Cyp4e3
CG6006	Trxr-1	spirit
CG7888	CG32694	AQP
Ets65A	Vinc	CG4213
CG5687	Usp1	CG4945
Rh50	AnxB9	CG7560
SP1029	dl	Cyp4e1
CG10311	CG11050	CG10352
CG6231	CG5191	CG14892
Nsf2	CG5059	CG2065
Cad86C	Tsp42Ee	metl
Gli	CG42390	Ser
CG12746	sr	CG12866
Keap1	Act79B	unc-4
Proc-R	LUBEL	Vha16-1
stac	bgm	Gs2
CHKov1	NKCC	Oda
rgr	zfh1	eIF4G1
DIP-eta	l(3)77CDf	vsg
CPT2	Clk	CG32647
Tina-1	coro	Glut4EF
CG44325	rictor	Mnt
fw	wdp	PAPLA1
Coq8	Mctp	Obp99c
ham	Scp1	Mkp3
AdamTS-B	Pvr	CG10960
CG9338	CG9812	tok
Hsp68	tnc	CNBP
sosie	CG10947	gol
htl	CG5618	CG10433
CG6847	tn	vri
CG8520	gukh	Col4a1
lbl	Irp-1B	Su(dx)
Grip	Pgd	Gnmt
ort	Vha100-2	NUCB1
CG4991	l(2)01289	Rab11
Dhc93AB	CG6145	vkg
CG9449	Lac	cv-d
CG31103	CrebA	Mapmodulin
Ccdc85	Picot	roq
CG12344	CG1674	eRF3
Odc1	CG5945	CG6330
ss	Mp20	l(1)G0320
CG6225	h	Sec61alpha
pbl	ple	glec
CG10126	PRAS40	CG3829
Rcd2	AdSS	RpS21
CG15890	bur	CG10680
CG17572	CG8306	CG13887
Cyp12a5	blot	Trx-2
Traf4	CG5009	Rab10
NPF	CG10550	Hydr2
CG5599	betaTub97EF	Gp210
nompC	Act87E	akirin
CG1265	meng	CG11857
rau	fbl	Surf4
CG7900	CG14661	CG5162
CG31036	Cpr67B	CG8814
CG8768	Mmp1	eIF3j
CG42534	CG43693	CG13631
CG3339	ry	CG6870
CG10513	CG6701	CG10576
Vha36-3	CG17111	Fkbp14
Sox15	fng	ergic53
SmydA-7	CG7530	eIF2beta
CG15528	daw	KdelR
CG9626	CG10621	CG15201
CG45105	su(r)	Usp8
r-l	Thor	vig2
Tsp42Eh	CG9837	Naa30A
dom	CG12814	CG17271
Dmtn	MFS14	Tom40
Baldspot	Dll	eEF1delta
crb	CG9399	U2af50
ome	pot	Rab6
chb	Hmgs	RpL24-like
tsl	CG33110	Sec22
CG11313	CG4199	CG11076
NAAT1	bark	CG6805
Drip	r	Lst
CG10939	pes	CG9911
Arpc2	Myo31DF	GstE3
Tg	Gk2	ReepB
CG11550	Ance-3	Sec61beta
ClpP	AnxB10	Tapdelta
CG10055	CG8745	CG7272
Adgf-A	ITP	CG31997
CG17834	loco	CG11334
CG5721	CG9436	CG17574
CG10553	Fmo-2	Adi1
CG11980	CG9498	SsRbeta
Loxl2	CG14439	CG11378
firl	b	CG32278
CG12268	Mrp4	p24-1
Nup54	pain	Alg1
CG31436	CG14687	CG7016
Pex2	Cdc7	RabX1
NtR	LKRSDH	bai
Art3	Asph	Nmd3
DCTN5-p25	CG5080	Nnp-1
Ten-m	CG5346	CG11811
CG14762	SerT	CG13220
Ndae1	CG3630	Ostgamma
spg	GILT1	CG2608
CG13743	MsrA	CG7872
CG1358	CG5177	CG2199
robo3	LanB2	SamDC
CG6123	ppl	CG12355
Akr1B	CG11899	Sec61gamma
CG8034	AnxB11	CG32344
CoRest	CG5023	CG2681
GABA-B-R3	kon	Zip89B
dpr4	CG10512	BomS1
CG13579	CG10527	Rs1
Jabba	Nep2	CG13364
Dcr-2	CG6175	CG15202
CG6126	CG14688	CG1532
CG6356	Jra	mRpL24
nvy	phu	CG12811
snRNA:U2:34ABa	Sp1	Fkbp39
snoRNA:Psi28S-3342	CG8008	mRpL30
DAT	CG4733	CG6665
AkhR	alpha-Est10	CG31777
kn	plh	NO66
Rx	Ugt302C1	CG8414
RpL17	CG11241	robl
Cyp28d1	Mocs1	CG1236
Cpr72Ec	CG4374	Pfdn5
scaf	Spn42Dd	Nop56
Npc2h	CG12512	CG1785
eIF3f1	Fatp3	Prx2540-2
CG31663	Tsp42Ef	nclb
e	CG9717	Srp9
ND-PDSW	Tep3	CG12325
CG7997	CG31121	CG31248
Mct1	sug	CG8303
CG7322	Mes2	CG7800
ND-B14.5A	CG4461	Srp19
Cyp309a1	CG15673	CG2811
Sec5	CG4797	Fib
DhpD	Sidpn	loj
wmd	CG5707	Rbm13
CG7299	CG5955	CG9922
CG1552	mol	CG15019
CG2004	CG3842	RpLP0-like
Gga	CG1628	CG30033
Taf12	slow	Dph5
CG5382	Root	CG6429
grass	CG13428	mRpL19
unc-104	CG17278	l(1)G0020
rut	egr	Nph
Pka-C1	Sobp	CG4115
CG17816	CG13794	Agpat4
Rbp	CG32091	RpII18
sdt	fit	CG6712
Plc21C	Wnt6	CG34228
CG11319	CG15544	gammaSnap1
btsz	CG10026	mRpL18
rdgB	Neurochondrin	dmrt99B
Rgk1	CG10348	CG30151
jdp	Duox	AOX1
CG31522	Kah	CG11854
CG12531	Agpat2	CG17124
sNPF	CG9451	CG4829
Pka-R1	CG32032	comm2
CG30158	MFS9	GstD9
Dop1R2	CG6142	CG7509
CG31523	Nep7	ninaE
Pxn	Ude	Atpalpha
CG32204	ZnT77C	Sh
5-HT1A	insc	Ggamma30A
ey	Crg-1	ps
Elk	Nha1	Cam
CG42339	edl	Rbp6
dac	Irk1	shep
Syngr	FipoQ	Lk6
a	CG17221	norpA
Octbeta3R	MME1	Rim
Mi-2	CG5849	lola
CG31760	Tsp42Ei	Rdl
CG8500	CG18622	mamo
eIF3b	Lrt	nrv3
Rgl	SmydA-9	aqz
nahoda	CG13912	14-3-3zeta
Ktl	Esp	Sap47
emb	CG33296	pAbp
CG4502	CG9815	Nplp2
metro	CG14694	nSyb
CG3625	CG6972	Pdp1
dia	CG5104	dysc
by	CG14401	Cow
Tak1	CG11529	sgg
CG1814	Mco1	CG42795
Rgk2	CG7365	Bsg
cnk	CG5377	Ih
CG5326	Tre1	Hrb27C
Ac78C	CG5909	SK
Cen	CG3348	bol
fkh	Apoltp	Mob2
Snap24	jeb	qvr
ADPS	tim	mura
CG8042	Moe	eEF1alpha2
Irk2	CG13784	AGO1
CG42319	Ppn	wdb
CG5787	eIF1A	14-3-3epsilon
Cyp4aa1	Arf79F	Rm62
CG4660	pst	scrt
Vha14-1	aop	CG9813
CG13284	Pisd	Tlk
lwr	Tudor-SN	sqd
Hr51	Pu	Hk
RpA-70	Trp1	CG15765
HDAC1	alpha-Est8	CG45050
Ns2	Tig	Bacc
CG8289	per	His3.3B
hec	slf	rudhira
Rat1	msk	CanA-14F
Chmp1	CG8665	Larp4B
kni	CG13185	CG6329
Lgr3	subdued	dtn
CngA	CG32276	ctp
CG2921	mod	DopEcR
Syx17	out	tna
hui	Sod3	CG14989
ash2	CG5958	Gdap2
Rbsn-5	CG5773	CG18067
CysRS	ImpL2	flw
CG14407	spz	Vmat
Cyp9h1	CG3597	Rbp1-like
Mat89Ba	CG10560	Idgf4
CG14220	CG17193	ens
CG3823	CROT	hwt
CG7133	CG1572	CG43066
grk	Ent2	CG12605
btl	Ns4	Rab3
	Elal	porin
	atk	CG5273
	pit	tyf
	Nlp	RpS7
	Sardh	Slik
	CG10205	corto
	Nop60B	Wnk
	Tsp42Eg	Atx2
	CG13360	CG11000
	CG8939	Lsd-2
	CG44242	Fer2LCH
	CG16743	RpS29
	CG5033	RpL6
	drm	Ptpmeg2
	NimC1	mahe
	Kaz1-ORFB	path
	CG16820	Vha44
	CG31126	stau
	Drat	Frq1
	dsb	tau
	Ppcs	inaD
	ZnT63C	Pdi
	Jafrac1	fax
	Lgr1	l(1)G0289
	CG8654	Trf2
	Mip	Vap33
	AstA	CkIalpha
	Phk-3	CG8677
	RpS15	RpS23
	Pdh	CG44838
	Droj2	CycT
	bic	tral
	RpL31	Imp
	RpS19a	chic
	RpS17	Cyp1
	RpS9	ssx
	ATPsynF	Hrb98DE
	RpL29	CG30389
	COX5B	cg
	CG8369	Atg8a
	CG15021	Cnx99A
	CG2016	kra
	COX8	RpL14
	ND-B12	SRPK
	CG9034	Rab5
	Hsc70-4	Cnot4
	CG5065	DCP2
	plx	RpL28
	CG44247	CG4612
	Sam-S	RpS28b
	wat	CG33181
	Hex-A	eff
	Dgk	RanBPM
	Fer1HCH	miple1
	Achl	mts
	ClC-c	RpS11
	qm	Lamp1
	CG11368	Pits
	krz	Rilpl
	trc	RpL12
	puml	Ssdp
	Obp49a	Reph
	Vha36-1	Atg17
	Cdc27	Rho1
	knrl	COX6B
	Kr-h2	Cpn
	Obp56g	Idh3a
	Sec63	Acn
	CG14277	Mnn1
	Sply	CG7220
	Hacd1	CG42258
	CG5597	RpL9
	Vps60	CG12239
	Nopp140	CG14478
	srl	Vrp1
	CG4554	kek1
	CG43324	Top1
	CG30172	Cyt-c-p
	RpI1	Rh6
	CG8051	COX5A
	beta4GalNAcTA	Pp1-87B
	CG9253	ltl
	SelG	RpS27
	CG14894	eIF5B
	Max	TM4SF
	imd	CG7378
	CG13096	sd
	CG4968	Mlf
	CG8157	Trf4-1
	CG10341	Dlic
		Tsp97E
		wcy
		CkIIbeta
		Synd
		Flo2
		Amun
		RpS13
		Chd64
		Crtc
		Ubqn
		Aps
		levy
		Rip11
		Ubc6
		CG2918
		CG16953
		His4r
		MtnA
		Kap-alpha3
		CG8405
		eIF4H1
		alph
		fon
		Frq2
		Chchd2
		RpS20
		Rok
		Sar1
		Cyp6w1
		Fmr1
		ari-1
		tbc
		SoxN
		Rap1
		TMS1
		hrg
		BomS2
		eIF4E1
		CG10600
		vvl
		CG3198
		CG12071
		Nelf-A
		BomS3
		Nplp3
		Rab2
		CG8910
		UbcE2H
		CG15312
		oc
		FBXO11
		Cbl
		CG7990
		Cyt-b5
		Vha13
		Edc3
		IscU
		Deaf1
		CG1316
		Cyp4e2
		MSBP
		Rab7
		Pglym78
		CG10508
		UBL3
		roh
		Galphas
		CG7546
		CG14591
		Aef1
		mrva
		homer
		CG5522
		CG3061
		HmgZ
		laza
		Ndf
		CG15771
		ATPsyndelta
		bsk
		COX7C
		CG8963
		CG42240
		CG18815
		Naus
		CG16772
		CG17321
		Stam
		Tango5
		lolal
		ATPsynE
		CG11211
		CG1468
		CG11317
		eIF3h
		sau
		CG4364
		CG6983
		CG13585
		CG8188
		CG6912
		CG7630
		Ran
		CG2162
		RhoGAP68F
		Dp
		nudE
		Scamp
		CG1910
		CanB
		Fkbp12
		CG12213
		CG14435
		Mtp
		cype
		D1
		Mo25
		Faf2
		Hrb87F
		Dhit
		CG3907
		CG9132
		Rb97D
		Rab14
		Rsf1
		EloB
		SkpA
		Vps26
		CG6357
		casp
		GV1
		Cdc42
		Dh44
		Nca
		sun
		CG11791
		Ms
		endos
		CG8668
		tsr
		Arf51F
		eIF3g1
		dmpd
		Agpat1
		dpr20
		ND-B17
		sip3
		Cpr49Ae
		MICAL-like
		qkr58E-1
		Proc
		Neb-cGP
		mge
		Idgf3
		pyr
		Yeti
		ncm
		Hdc
		Syx5
		Snx3
		CG3008
		tgo
		Hr3
		nes
		eIF1
		spab
		Vsx1
		Arl8
		Abi
		CAH3
		SCCRO4
		scf
		TM9SF4
		His3.3A
		hook
		schlank
		Rac1
		Ntf-2
		CG17734
		CG1161
		smt3
		ND-ASHI
		CG6656
		Pc
		CG1703
		CG5316
		CG7878
		Rheb
		CG6115
		EMC7
		CG8206
		Rap2l
		Psc
		AstC
		Ccm3
		UQCR-11
		BTBD9
		Sgt
		CG34134
		Lsm12a
		ND-B18
		eIF3k
		ox
		ND-B14
		pr
		CG10333
		CG17454
		CARPA
		CG14024
		Drep1
		Ubc4
		Ubc10
		CG30423
		Jwa
		UQCR-6.4
		salm
		Sirup
		CG11267
		RagC-D
		e(r)
		REG
		ken
		CG13024
		bc10
		CG17778
		STUB1
		CG17385
		CG3760
		Manf
		GNBP2
		CG9705
		Tom7
		CG9065
		RabX4
		Dlc90F
		Ykt6
		Fip1
		CG4511
		TfIIFalpha
		frma
		Gasp
		CG7339
		TfIIS
		GIIIspla2
		Spase22-23
		Mtap
		CG14274
		EMC4
		MBD-like
		Sf3b6
		CG11927
		Tmc
		CG8360
		CG10209
		zetaCOP
		GstO3
		Pcmt
		CG34331
		UbcE2M
		Pfdn2
		CG7203
		Rpn12
		Cka
		bocks
		Nap1
		HIP
		CG10340
		CG12608
		CG4806
		nmd
		CG8611
		maf-S
		CG14275
		CG15715
		CG14184
		CG12093
		Tspo
		san
		Fdx2
		CG14132
		Obp18a
		CG8149
		TfIIA-S
		mRpS26
		CRIF
		CG8389
		CG11417
		CG7772
		CG13367
		CG17202
		Atg6
		boca
		CG9706
		MED6
		wds
		CSN6
		zye
		ghi
		CG13625
		RhoGAP5A
		CG9849
		CG6843
		Cpr47Ee
		CG13751
		Sem1
		CIA30
		CG9586
		Pfdn4
		FRG1
		CG10395
		CG13606
		CG18428
		coil
		MrgBP
		Idi
		CG30026
		Dad1
		gb
		Vps29
		l(2)09851
		PDCD-5
		CG7484
		mRpS11
		CG3335
		CG15602
		CG14715
		CG5645
		CG5800
		CG10470
		CG2972
		Acbp1
		Meics
		CG7275
		Taf10
		Ing5
		CG32726
		Sbp2
		Arl1
		Ufc1
		Obp56h
		CG5567
		CG4328
		sds22
		Mat1
		CG46338
		CG32576
		mRpL47
		Elp2
		mRpS14
		fd102C
		mRpL9
		CG34200
		Rpb12
		holn1
		Sas10
		mRpL27
		Pepck2
		CG11180
		CG11583
		Sting
		CG30285
		nero
		Cbp20
		JTBR
		VepD
		CG9004
		EMC5
		dbe
		Rpt6
		CG13722
		CG12301
		Rlb1
		Adk2
		CG18178
		SNRPG
		CG12173
		Srp14
		Pfdn1
		MED22
		CG7168
		mRpL33
		mRpS33
		CG1789
		CG30109
		CG14341
		Pop1
		Cht11
		CG13994
		CG2662
		EMC6
		snRNP-U1-C
		CG7130

## Sheet: MB-only & MBWH
source	term_name	term_id	GeneRatio	BgRatio	adjusted_p_value	negative_log10_of_adjusted_p_value	geneID
GO:MF	transmembrane transporter activity	GO:0022857	0.133835	0.0677525	8.47975e-08	7.07162	SERCA,SPIN,CG3036,SNU,CG33970,SCAMC,CG7720,SBM,CG15096,ND-49,NKCC,VHA100-2,PICOT,BLOT,CG43693,MFS14,CG9399,CG14439,MRP4,PAIN,SERT,CG8008,CG9717,CG31121,CG4797,CG1628,CG13794,CG32091,MFS9,ZNT77C,NHA1,IRK1,MME1,ESP,CG33296,CG14694,TRP1,SUBDUED,OUT,ENT2,ZNT63C,CG8654,ATPSYNF,CLC-C,VHA36-1,SEC63,CG8051,CG14894,TRPL,BLW,ATPSYNBETA,CG31689,EAAT1,ND-75,NCC69,CG17646,ARALAR1,ATPSYNGAMMA,VHASFD,CLC-A,VHA6…
GO:MF	transporter activity	GO:0005215	0.138346	0.0723701	2.30587e-07	6.63717	SERCA,SPIN,CG3036,SNU,CG33970,SCAMC,CG7720,SBM,CG15096,ND-49,NKCC,VHA100-2,PICOT,BLOT,CG43693,MFS14,CG9399,CG14439,MRP4,PAIN,SERT,CG8008,FATP3,CG9717,CG31121,CG4797,CG1628,CG13794,CG32091,MFS9,ZNT77C,NHA1,IRK1,MME1,ESP,CG33296,CG14694,APOLTP,TRP1,SUBDUED,OUT,ENT2,ZNT63C,CG8654,ATPSYNF,CLC-C,VHA36-1,SEC63,CG8051,CG14894,TRPL,BLW,ATPSYNBETA,CG31689,EAAT1,ND-75,NCC69,CG17646,ARALAR1,ATPSYNGAMMA,VHAS…
GO:MF	oxidoreductase activity	GO:0016491	0.108271	0.055411	8.28508e-06	5.0817	FASN1,CG9674,MEN,IDH,GPDH1,GDH,CG6910,CPR,ALDH-III,D2HGDH,GSTD1,CYP4D21,GPO1,ND-49,MTPALPHA,TRXR-1,PGD,PLE,CG8306,CG5009,RY,SU(R),CG4199,CG9436,FMO-2,LKRSDH,ASPH,CG5346,GILT1,MSRA,CG10512,CG14688,CG5955,CG3842,DUOX,CG6142,CG17221,MCO1,CG8665,SOD3,CG3597,SARDH,DRAT,JAFRAC1,PDH,COX8,ND-B12,CG5065,WAT,FER1HCH,GAPDH1,SDHA,ND-75,CG5214,CG5028,SDHB,MTPBETA,CYP12A5,LOXL2,FIRL,CG12268,AKR1B,CYP28D1,ND-PD…
GO:MF	small molecule binding	GO:0036094	0.342857	0.251532	1.29724e-05	4.88698	FASN1,SERCA,CG9674,ACCOAS,PCB,MEN,ENO,MACON1,PYK,GLYP,IDH,GPDH1,SHN,PDK1,SVR,GDH,UQCR-C1,TTD14,CG6910,SNU,CG10737,BEL,CG33970,DIAP1,MLC2,HR38,DSX,SCAMC,CPR,CG32369,KR-H1,BON,SIK3,D2HGDH,ACTN,S6K,GCLC,CYP4D21,GPO1,CG14207,ND-49,MTPALPHA,TRXR-1,ANXB9,DL,CG11050,ACT79B,LUBEL,BGM,ZFH1,MCTP,SCP1,PVR,CG5618,TN,IRP-1B,PGD,CG6145,PLE,ADSS,BUR,CG5009,BETATUB97EF,ACT87E,MENG,FBL,MMP1,RY,FNG,CG7530,CG10621,…
GO:MF	ion binding	GO:0043167	0.32782	0.243221	8.08931e-05	4.09209	SERCA,CG9674,ACCOAS,PCB,MEN,ENO,MACON1,PYK,GLYP,IDH,SHN,PDK1,SVR,GDH,UQCR-C1,TTD14,CG6910,SNU,CG10737,BEL,CG33970,DIAP1,MLC2,HR38,DSX,SCAMC,CPR,CG32369,KR-H1,BON,SIK3,D2HGDH,ACTN,S6K,GCLC,CYP4D21,GPO1,CG14207,MTPALPHA,TRXR-1,ANXB9,DL,CG11050,ACT79B,LUBEL,BGM,ZFH1,MCTP,SCP1,PVR,CG5618,TN,IRP-1B,CG6145,PLE,ADSS,BUR,CG5009,BETATUB97EF,ACT87E,MENG,FBL,MMP1,RY,FNG,CG7530,CG10621,SU(R),CG4199,R,MYO31DF…
GO:MF	heterocyclic compound binding	GO:1901363	0.168421	0.105533	8.17336e-05	4.0876	SERCA,CG9674,ACCOAS,PCB,MEN,PYK,GLYP,IDH,GPDH1,PDK1,GDH,TTD14,SNU,BEL,CG33970,CPR,SIK3,D2HGDH,S6K,GCLC,ND-49,MTPALPHA,TRXR-1,ACT79B,BGM,PVR,CG5618,PGD,ADSS,BUR,CG5009,BETATUB97EF,ACT87E,MENG,FBL,RY,SU(R),CG4199,R,MYO31DF,GK2,CG8745,FMO-2,B,MRP4,CDC7,CG5346,SERT,CG11899,CG11241,MOCS1,CG31121,CG32091,CG6142,PU,CG13185,CG3597,NS4,PIT,PDH,DROJ2,HSC70-4,SAM-S,HEX-A,DGK,TRC,SPLY,CG9253,BLW,ATPSYNBETA,C…
GO:MF	anion binding	GO:0043168	0.160902	0.103014	0.000454372	3.34259	SERCA,CG9674,ACCOAS,PCB,PYK,GLYP,PDK1,GDH,TTD14,SNU,BEL,CG33970,CPR,SIK3,D2HGDH,S6K,GCLC,MTPALPHA,TRXR-1,ACT79B,BGM,PVR,CG5618,ADSS,BUR,CG5009,BETATUB97EF,ACT87E,MENG,FBL,RY,CG4199,R,MYO31DF,GK2,CG8745,FMO-2,B,MRP4,CDC7,CG5346,CG11899,CG11241,MOCS1,CG31121,CG32091,CG6142,MOE,PU,CG13185,NS4,PIT,DROJ2,HSC70-4,SAM-S,HEX-A,DGK,TRC,SPLY,CG9253,TRPL,SVIL,BLW,ATPSYNBETA,CG31689,STRN-MLCK,CG1640,SDHA,UNC…
GO:MF	catalytic activity	GO:0003824	0.433083	0.349005	0.000791279	3.10167	FASN1,SERCA,CG9674,ACCOAS,PCB,MEN,ENO,MACON1,PYK,KDN,GLYP,IDH,GPDH1,PDK1,CG7920,SVR,GDH,UQCR-C1,CG6910,SNU,BEL,CG33970,TREH,PLI,DIAP1,CPR,CG32369,ALDH-III,PUC,BON,SIK3,OYS,D2HGDH,PRM,PECT,MUC,GSTD1,S6K,GCLC,CYP4D21,GPO1,ND-49,CG2201,MTPALPHA,TRXR-1,USP1,CG11050,CG5191,SR,ACT79B,LUBEL,BGM,PVR,CG10947,CG5618,TN,IRP-1B,PGD,CG6145,PLE,ADSS,BUR,CG8306,CG5009,CG10550,BETATUB97EF,ACT87E,MENG,FBL,MMP1,RY…
GO:MF	inorganic anion transmembrane transporter activity	GO:0015103	0.0240602	0.00621274	0.000800228	3.09679	NKCC,PICOT,SERT,CG9717,CG13794,NHA1,ESP,CG33296,SUBDUED,CLC-C,NCC69,CLC-A,ORT,CG12344,NDAE1,DAT
GO:MF	inorganic molecular entity transmembrane transporter activity	GO:0015318	0.0616541	0.028629	0.000894124	3.0486	SERCA,NKCC,VHA100-2,PICOT,BLOT,PAIN,SERT,CG9717,CG13794,ZNT77C,NHA1,IRK1,MME1,ESP,CG33296,SUBDUED,ZNT63C,ATPSYNF,CLC-C,VHA36-1,TRPL,BLW,ATPSYNBETA,EAAT1,NCC69,ATPSYNGAMMA,VHASFD,CLC-A,VHA68-2,RH50,ORT,CG12344,NOMPC,VHA36-3,NAAT1,DRIP,NDAE1,DAT,ELK,IRK2,VHA14-1
GO:MF	actin binding	GO:0003779	0.0360902	0.0126774	0.00102971	2.98728	CLIP-190,CHER,ACTN,ZASP66,VINC,CORO,GUKH,CG1674,MP20,MYO31DF,CG3630,CG5023,MOE,SLS,SVIL,ZASP52,UNC-89,FHOS,KEAP1,ARPC2,ROBO3,DIA,BY,CG42319
GO:MF	chloride transmembrane transporter activity	GO:0015108	0.0180451	0.00386198	0.00186342	2.72969	NKCC,SERT,CG13794,NHA1,CG33296,SUBDUED,CLC-C,NCC69,CLC-A,ORT,CG12344,DAT
GO:MF	nucleotide binding	GO:0000166	0.150376	0.0986483	0.0030871	2.51045	SERCA,CG9674,ACCOAS,PCB,MEN,PYK,IDH,GPDH1,PDK1,GDH,TTD14,SNU,BEL,CG33970,CPR,SIK3,D2HGDH,S6K,GCLC,ND-49,MTPALPHA,TRXR-1,ACT79B,BGM,PVR,PGD,ADSS,BUR,CG5009,BETATUB97EF,ACT87E,MENG,FBL,RY,SU(R),CG4199,R,MYO31DF,GK2,FMO-2,MRP4,CDC7,MOCS1,CG31121,CG32091,CG6142,PU,CG13185,CG3597,NS4,PIT,PDH,DROJ2,HSC70-4,SAM-S,HEX-A,DGK,TRC,CG9253,BLW,ATPSYNBETA,CG31689,STRN-MLCK,GAPDH1,SDHA,UNC-89,PFK,CG17646,FER,PG…
GO:MF	nucleoside phosphate binding	GO:1901265	0.150376	0.0986483	0.0030871	2.51045	SERCA,CG9674,ACCOAS,PCB,MEN,PYK,IDH,GPDH1,PDK1,GDH,TTD14,SNU,BEL,CG33970,CPR,SIK3,D2HGDH,S6K,GCLC,ND-49,MTPALPHA,TRXR-1,ACT79B,BGM,PVR,PGD,ADSS,BUR,CG5009,BETATUB97EF,ACT87E,MENG,FBL,RY,SU(R),CG4199,R,MYO31DF,GK2,FMO-2,MRP4,CDC7,MOCS1,CG31121,CG32091,CG6142,PU,CG13185,CG3597,NS4,PIT,PDH,DROJ2,HSC70-4,SAM-S,HEX-A,DGK,TRC,CG9253,BLW,ATPSYNBETA,CG31689,STRN-MLCK,GAPDH1,SDHA,UNC-89,PFK,CG17646,FER,PG…
GO:MF	monoatomic anion transmembrane transporter activity	GO:0008509	0.0195489	0.00470154	0.00308796	2.51033	NKCC,SERT,CG13794,NHA1,CG33296,SUBDUED,CLC-C,NCC69,CLC-A,ORT,CG12344,NDAE1,DAT
GO:MF	solute:sodium symporter activity	GO:0015370	0.0150376	0.00293846	0.00470893	2.32708	NKCC,BLOT,SERT,CG13794,CG33296,EAAT1,NCC69,NAAT1,NDAE1,DAT
GO:MF	oxidoreductase activity, acting on CH-OH group of donors	GO:0016614	0.0315789	0.0115859	0.00833535	2.07908	FASN1,MEN,IDH,GPDH1,D2HGDH,GPO1,MTPALPHA,PGD,CG9436,CG5955,CG3842,CG6142,CG17221,CG3597,DRAT,PDH,CG5028,MTPBETA,FIRL,AKR1B,CG7322
GO:MF	active monoatomic ion transmembrane transporter activity	GO:0022853	0.0285714	0.00990681	0.00899388	2.04605	SERCA,NKCC,VHA100-2,BLOT,SERT,CG13794,NHA1,CG33296,VHA36-1,ATPSYNBETA,EAAT1,NCC69,VHASFD,VHA68-2,VHA36-3,NAAT1,NDAE1,DAT,VHA14-1
GO:MF	monoatomic anion:sodium symporter activity	GO:0015373	0.00902256	0.00109143	0.012079	1.91797	NKCC,SERT,CG13794,CG33296,NCC69,DAT
GO:MF	sodium:chloride symporter activity	GO:0015378	0.00902256	0.00109143	0.012079	1.91797	NKCC,SERT,CG13794,CG33296,NCC69,DAT
GO:MF	organic acid transmembrane transporter activity	GO:0005342	0.0285714	0.0101587	0.0128888	1.88979	SBM,NKCC,CG43693,CG9399,CG1628,CG13794,CG33296,OUT,CG8051,EAAT1,NCC69,ARALAR1,CG7888,CG4991,NAAT1,CG13743,CG8034,MCT1,CG12531
GO:MF	carboxylic acid transmembrane transporter activity	GO:0046943	0.0285714	0.0101587	0.0128888	1.88979	SBM,NKCC,CG43693,CG9399,CG1628,CG13794,CG33296,OUT,CG8051,EAAT1,NCC69,ARALAR1,CG7888,CG4991,NAAT1,CG13743,CG8034,MCT1,CG12531
GO:MF	purine nucleotide binding	GO:0017076	0.135338	0.089749	0.0138534	1.85845	SERCA,ACCOAS,PCB,MEN,PYK,IDH,GPDH1,PDK1,GDH,TTD14,SNU,BEL,CG33970,CPR,SIK3,S6K,GCLC,ND-49,MTPALPHA,ACT79B,BGM,PVR,PGD,ADSS,BUR,BETATUB97EF,ACT87E,MENG,FBL,SU(R),R,MYO31DF,GK2,FMO-2,MRP4,CDC7,MOCS1,CG31121,CG32091,PU,CG13185,NS4,PIT,DROJ2,HSC70-4,SAM-S,HEX-A,DGK,TRC,CG9253,BLW,ATPSYNBETA,CG31689,STRN-MLCK,GAPDH1,UNC-89,PFK,CG17646,FER,PGK,VHA68-2,RGK3,PKCDELTA,SQA,NSF2,HSP68,HTL,CG8520,DHC93AB,CG3…
GO:MF	active transmembrane transporter activity	GO:0022804	0.0466165	0.0216606	0.0149589	1.8251	SERCA,SNU,CG33970,CG7720,ND-49,NKCC,VHA100-2,PICOT,BLOT,MRP4,SERT,CG31121,CG13794,CG32091,NHA1,CG33296,VHA36-1,ATPSYNBETA,CG31689,EAAT1,ND-75,NCC69,CG17646,VHASFD,VHA68-2,CG5687,VHA36-3,NAAT1,NDAE1,DAT,VHA14-1
GO:MF	inorganic cation transmembrane transporter activity	GO:0022890	0.0481203	0.0233398	0.0261597	1.58237	SERCA,NKCC,VHA100-2,BLOT,PAIN,SERT,CG13794,ZNT77C,NHA1,IRK1,MME1,CG33296,ZNT63C,ATPSYNF,VHA36-1,TRPL,BLW,ATPSYNBETA,EAAT1,NCC69,ATPSYNGAMMA,VHASFD,VHA68-2,RH50,NOMPC,VHA36-3,NAAT1,NDAE1,DAT,ELK,IRK2,VHA14-1
GO:MF	cytoskeletal protein binding	GO:0008092	0.0586466	0.0308119	0.0267236	1.5731	CLIP-190,MLC2,CHER,ACTN,ZASP66,VINC,ANXB9,CORO,GUKH,CG1674,MP20,MYO31DF,CG3630,CG5023,MOE,SLS,SVIL,CG18135,ZASP52,UNC-89,CG2082,TACC,NEDD4,CG30069,FHOS,MLC-C,DCX-EMAP,KEAP1,NOMPC,CRB,CHB,ARPC2,TEN-M,ROBO3,UNC-104,CG17816,DIA,BY,CG42319
GO:MF	oxidoreductase activity, acting on the CH-OH group of donors, NAD or NADP as acceptor	GO:0016616	0.0270677	0.00982285	0.026942	1.56957	FASN1,MEN,IDH,GPDH1,MTPALPHA,PGD,CG9436,CG5955,CG3842,CG17221,CG3597,DRAT,PDH,CG5028,MTPBETA,FIRL,AKR1B,CG7322
GO:MF	organic anion transmembrane transporter activity	GO:0008514	0.0315789	0.0125934	0.0292306	1.53416	SCAMC,SBM,NKCC,CG43693,CG9399,CG1628,CG13794,CG33296,OUT,CG8051,EAAT1,NCC69,ARALAR1,CG7888,CG4991,NAAT1,NDAE1,CG13743,CG8034,MCT1,CG12531
GO:MF	symporter activity	GO:0015293	0.0195489	0.00579296	0.0322991	1.49081	CG7720,NKCC,PICOT,BLOT,SERT,CG13794,CG33296,EAAT1,NCC69,CG5687,NAAT1,NDAE1,DAT
GO:MF	monoatomic cation transmembrane transporter activity	GO:0008324	0.0511278	0.0257745	0.0341192	1.467	SERCA,NKCC,VHA100-2,BLOT,PAIN,SERT,CG13794,ZNT77C,NHA1,IRK1,MME1,CG33296,SUBDUED,ZNT63C,ATPSYNF,VHA36-1,TRPL,BLW,ATPSYNBETA,EAAT1,NCC69,ATPSYNGAMMA,VHASFD,VHA68-2,NOMPC,VHA36-3,NAAT1,NTR,NDAE1,DAT,ELK,IRK2,VHA14-1,CNGA
GO:MF	adenyl nucleotide binding	GO:0030554	0.114286	0.0749727	0.0411149	1.386	SERCA,ACCOAS,PCB,MEN,PYK,IDH,GPDH1,PDK1,GDH,SNU,BEL,CG33970,CPR,SIK3,S6K,GCLC,ND-49,MTPALPHA,ACT79B,BGM,PVR,PGD,BUR,ACT87E,MENG,FBL,SU(R),R,MYO31DF,GK2,FMO-2,MRP4,CDC7,CG31121,CG32091,CG13185,PIT,DROJ2,HSC70-4,SAM-S,HEX-A,DGK,TRC,CG9253,BLW,ATPSYNBETA,CG31689,STRN-MLCK,GAPDH1,UNC-89,PFK,CG17646,FER,PGK,VHA68-2,PKCDELTA,SQA,NSF2,HSP68,HTL,CG8520,DHC93AB,CG3339,DOM,DCR-2,UNC-104,RUT,PKA-C1,PKA-R1,M…
GO:MF	amino acid transmembrane transporter activity	GO:0015171	0.0210526	0.00680044	0.0465974	1.33164	SBM,NKCC,CG43693,CG1628,CG13794,CG33296,EAAT1,NCC69,ARALAR1,CG7888,CG4991,NAAT1,CG13743,CG12531
GO:MF	monoatomic anion:monoatomic cation symporter activity	GO:0015296	0.00902256	0.0013433	0.0487779	1.31178	NKCC,SERT,CG13794,CG33296,NCC69,DAT
GO:MF	chloride:monoatomic cation symporter activity	GO:0015377	0.00902256	0.0013433	0.0487779	1.31178	NKCC,SERT,CG13794,CG33296,NCC69,DAT
GO:BP	cellular process	GO:0009987	0.870229	0.731668	9.49157e-16	15.0227	FASN1,SERCA,CG9674,ACCOAS,PCB,MEN,ENO,MACON1,PYK,FRY,KDN,GLYP,IDH,GPDH1,CLIP-190,SHN,SPIN,PDK1,CG7920,SVR,DOR,GDH,CG3036,DP1,UQCR-C1,TTD14,CWO,SNU,CG43658,BEL,CG33970,PLI,DIAP1,MLC2,HR38,CG40006,DSX,CG14186,SCAMC,ATF3,STY,CACT,CG7720,SBM,VPS13,ALDH-III,KR-H1,RAW,PUC,BON,MESR3,CG32425,CG42672,SIK3,CHER,OYS,D2HGDH,ACTN,ZASP66,PRM,PECT,CG15096,LSD-1,MUC,GSTD1,S6K,GCLC,PURA,CG10237,GPO1,CG14207,ND-49…
GO:BP	organic acid metabolic process	GO:0006082	0.10229	0.0335415	1.05901e-13	12.9751	FASN1,SERCA,CG9674,ACCOAS,PCB,MEN,ENO,PYK,KDN,IDH,CG7920,GDH,D2HGDH,MUC,MTPALPHA,CG5191,BGM,CG5618,TN,IRP-1B,PGD,PLE,BUR,CG5009,RY,CG10621,SU(R),CG33110,R,B,LKRSDH,MSRA,PPL,CG11899,CG11241,CG12512,FATP3,CG5955,CG8665,CROT,SARDH,CG44242,HEX-A,SPLY,HACD1,ACSL,LPIN,GAPDH1,SREBP,CG1640,SDHA,PFK,CG5214,CG5028,PGK,FUM1,CG1673,MTPBETA,CPT2,ODC1,CG5599,CG7900,BALDSPOT,E,CG31522,CG31523,CG5326
GO:BP	small molecule metabolic process	GO:0044281	0.164885	0.072217	1.08735e-13	12.9636	FASN1,SERCA,CG9674,ACCOAS,PCB,MEN,ENO,PYK,KDN,GLYP,IDH,CG7920,GDH,CG6910,SIK3,D2HGDH,PECT,MUC,GPO1,MTPALPHA,CG5191,BGM,CG5618,TN,IRP-1B,PGD,CG6145,PLE,ADSS,BUR,CG8306,CG5009,FBL,RY,CG10621,SU(R),HMGS,CG33110,R,GK2,B,LKRSDH,MSRA,PPL,CG11899,CG11241,CG12512,FATP3,CG5955,CG3842,PU,CG8665,CG3597,CROT,SARDH,CG44242,DRAT,PPCS,PDH,ATPSYNF,CG5065,SAM-S,WAT,HEX-A,SPLY,HACD1,BLW,SARM,ACSL,ATPSYNBETA,LPIN,G…
GO:BP	carboxylic acid metabolic process	GO:0019752	0.100763	0.0331993	2.34286e-13	12.6303	FASN1,SERCA,CG9674,ACCOAS,PCB,MEN,ENO,PYK,KDN,IDH,CG7920,GDH,MUC,MTPALPHA,CG5191,BGM,CG5618,TN,IRP-1B,PGD,PLE,BUR,CG5009,RY,CG10621,SU(R),CG33110,R,B,LKRSDH,MSRA,PPL,CG11899,CG11241,CG12512,FATP3,CG5955,CG8665,CROT,SARDH,CG44242,HEX-A,SPLY,HACD1,ACSL,LPIN,GAPDH1,SREBP,CG1640,SDHA,PFK,CG5214,CG5028,PGK,FUM1,CG1673,MTPBETA,CPT2,ODC1,CG5599,CG7900,BALDSPOT,E,CG31522,CG31523,CG5326
GO:BP	oxoacid metabolic process	GO:0043436	0.100763	0.0332848	2.67753e-13	12.5723	FASN1,SERCA,CG9674,ACCOAS,PCB,MEN,ENO,PYK,KDN,IDH,CG7920,GDH,MUC,MTPALPHA,CG5191,BGM,CG5618,TN,IRP-1B,PGD,PLE,BUR,CG5009,RY,CG10621,SU(R),CG33110,R,B,LKRSDH,MSRA,PPL,CG11899,CG11241,CG12512,FATP3,CG5955,CG8665,CROT,SARDH,CG44242,HEX-A,SPLY,HACD1,ACSL,LPIN,GAPDH1,SREBP,CG1640,SDHA,PFK,CG5214,CG5028,PGK,FUM1,CG1673,MTPBETA,CPT2,ODC1,CG5599,CG7900,BALDSPOT,E,CG31522,CG31523,CG5326
GO:BP	homeostatic process	GO:0042592	0.10687	0.0395311	1.28891e-11	10.8898	FASN1,SERCA,CG9674,ENO,PYK,TTD14,ATF3,SIK3,S6K,TRXR-1,BGM,NKCC,ZFH1,WDP,PVR,TN,IRP-1B,VHA100-2,LAC,H,CG5009,FBL,DAW,ITP,FATP3,EGR,ZNT77C,MME1,TIM,MOE,PPCS,ZNT63C,JAFRAC1,HEX-A,FER1HCH,CLC-C,PUML,SRL,SELG,TRPL,CNC,LPIN,SREBP,PFK,CG4928,FOXO,NCC69,NRV2,FHOS,NRV1,SVP,IF,CLC-A,PGK,VHA68-2,UIF,TUP,SQA,RH50,CPT2,CRB,DRIP,CG10939,NDAE1,JABBA,DAT,AKHR,PLC21C,DOP1R2,SYX17
GO:BP	multicellular organismal process	GO:0032501	0.430534	0.305382	2.41473e-09	8.61713	SERCA,EBPIII,MEN,FRY,KDN,GLYP,CLIP-190,SHN,SPIN,PDK1,SVR,TTD14,PINO,CWO,SNU,CG43658,BEL,TREH,DIAP1,MLC2,HR38,DSX,CPR,ATF3,STY,CACT,KR-H1,RAW,PUC,SIK3,CHER,OYS,MUC,S6K,GCLC,PURA,GPO1,OBP56D,MTPALPHA,TRXR-1,ANXB9,DL,SR,BGM,ZFH1,CLK,RICTOR,WDP,PVR,TNC,TN,LAC,CREBA,CG5945,H,PLE,BUR,BETATUB97EF,MENG,FBL,CG14661,CPR67B,MMP1,RY,CG6701,FNG,DAW,THOR,MFS14,DLL,POT,BARK,MYO31DF,ITP,LOCO,B,MRP4,PAIN,CDC7,MSR…
GO:BP	animal organ development	GO:0048513	0.189313	0.101994	3.01169e-09	8.52119	FRY,SHN,SVR,CG43658,DIAP1,DSX,STY,KR-H1,RAW,PUC,CHER,GCLC,PURA,ANXB9,DL,SR,ZFH1,WDP,PVR,TNC,LAC,CREBA,H,PLE,BETATUB97EF,FBL,MMP1,FNG,DAW,MFS14,DLL,POT,MYO31DF,LOCO,MRP4,LANB2,KON,JRA,SP1,SLOW,CG17278,SOBP,DUOX,INSC,EDL,IRK1,CG17221,JEB,MOE,AOP,MSK,ATK,NOP60B,DRM,PPCS,CG8369,QM,TRC,SLS,CAP,LPIN,DNR1,NEDD4,CG30069,FOXO,BDL,MRTF,NRV2,HOW,BAZ,FHOS,AP,SVP,IF,PAX,PIO,VHA68-2,UIF,TUP,SQA,NSF2,GLI,TINA-1…
GO:BP	imaginal disc development	GO:0007444	0.114504	0.0492855	3.9449e-09	8.40396	FRY,SHN,SVR,CG43658,DIAP1,DSX,STY,PUC,GCLC,PURA,ANXB9,DL,PVR,TNC,H,PLE,BETATUB97EF,FBL,MMP1,FNG,DAW,MFS14,DLL,POT,MYO31DF,MRP4,JRA,SP1,CG17278,DUOX,IRK1,MOE,MSK,NOP60B,DRM,PPCS,CG8369,TRC,LPIN,NEDD4,CG30069,MRTF,HOW,FHOS,AP,IF,PAX,PIO,VHA68-2,TUP,SQA,GLI,FW,ADAMTS-B,LBL,SS,TRAF4,SOX15,DOM,CRB,KN,SCAF,WMD,PKA-C1,DAC,BY,TAK1,CNK,IRK2,HR51,HUI,ASH2,RBSN-5,GRK,BTL
GO:BP	transmembrane transport	GO:0055085	0.151145	0.0754685	9.56854e-09	8.01915	SERCA,SPIN,CG3036,SNU,CG33970,SCAMC,CG7720,SBM,CG15096,NKCC,VHA100-2,PICOT,BLOT,CG43693,MFS14,CG9399,CG14439,MRP4,PAIN,SERT,CG8008,CG9717,CG31121,CG4797,CG1628,CG13794,CG32091,MFS9,ZNT77C,NHA1,IRK1,MME1,ESP,CG33296,CG14694,CG14401,TRP1,SUBDUED,OUT,ENT2,ZNT63C,CG8654,ATPSYNF,FER1HCH,CLC-C,VHA36-1,SEC63,CG8051,CG14894,TRPL,BLW,ATPSYNBETA,CG31689,EAAT1,NEDD4,NCC69,CG17646,NRV2,ARALAR1,NRV1,ATPSYNGAM…
GO:BP	imaginal disc morphogenesis	GO:0007560	0.0885496	0.0347395	3.31982e-08	7.47889	FRY,SHN,SVR,CG43658,DIAP1,STY,PUC,GCLC,PURA,DL,PVR,TNC,H,BETATUB97EF,FBL,MMP1,FNG,DAW,DLL,POT,MYO31DF,JRA,SP1,CG17278,DUOX,MOE,MSK,DRM,PPCS,TRC,LPIN,NEDD4,CG30069,MRTF,HOW,FHOS,AP,IF,PIO,SQA,GLI,FW,ADAMTS-B,LBL,SS,TRAF4,KN,SCAF,WMD,PKA-C1,DAC,BY,TAK1,CNK,HR51,ASH2,RBSN-5,GRK
GO:BP	chemical homeostasis	GO:0048878	0.070229	0.0241294	4.53563e-08	7.34336	FASN1,SERCA,CG9674,ENO,PYK,ATF3,SIK3,S6K,NKCC,IRP-1B,VHA100-2,CG5009,FBL,DAW,ITP,FATP3,ZNT77C,MME1,PPCS,ZNT63C,HEX-A,FER1HCH,CLC-C,PUML,SELG,TRPL,LPIN,SREBP,PFK,CG4928,FOXO,NCC69,NRV2,NRV1,SVP,CLC-A,VHA68-2,RH50,CPT2,DRIP,NDAE1,JABBA,DAT,AKHR,PLC21C,DOP1R2
GO:BP	monocarboxylic acid metabolic process	GO:0032787	0.0580153	0.0179687	1.06319e-07	6.97339	FASN1,SERCA,ACCOAS,PCB,MEN,ENO,PYK,IDH,CG7920,MUC,MTPALPHA,CG5191,BGM,TN,PGD,CG5009,CG33110,B,CG11241,CG12512,FATP3,CROT,HEX-A,HACD1,ACSL,LPIN,GAPDH1,SREBP,PFK,PGK,MTPBETA,CPT2,CG7900,BALDSPOT,E,CG31522,CG31523,CG5326
GO:BP	instar larval or pupal development	GO:0002165	0.10687	0.0477454	1.22763e-07	6.91093	FRY,SHN,SPIN,SVR,CG43658,BEL,DIAP1,STY,PUC,GCLC,PURA,DL,PVR,TNC,CREBA,H,BETATUB97EF,FBL,MMP1,FNG,DAW,DLL,POT,MYO31DF,JRA,SP1,MES2,CG17278,DUOX,UDE,MOE,PU,MSK,DRM,PPCS,MIP,ASTA,TRC,LPIN,NEDD4,CG30069,MRTF,HOW,FHOS,AP,IF,PIO,SQA,GLI,FW,ADAMTS-B,LBL,SS,TRAF4,TSL,KN,SCAF,WMD,PKA-C1,BTSZ,DAC,BY,TAK1,CNK,CYP4AA1,HR51,LGR3,ASH2,RBSN-5,GRK
GO:BP	anatomical structure morphogenesis	GO:0009653	0.222901	0.134337	1.26661e-07	6.89736	FRY,CLIP-190,SHN,SPIN,SVR,CWO,CG43658,DIAP1,MLC2,DSX,STY,CACT,KR-H1,RAW,PUC,CHER,OYS,ACTN,ZASP66,PRM,S6K,GCLC,PURA,DL,SR,ZFH1,RICTOR,PVR,TNC,TN,LAC,MP20,H,BUR,BETATUB97EF,FBL,MMP1,CG6701,CG17111,FNG,DAW,DLL,POT,MYO31DF,LOCO,CDC7,LANB2,KON,JRA,SP1,CG17278,WNT6,DUOX,CRG-1,JEB,MOE,AOP,TIG,MSK,IMPL2,SPZ,DRM,PPCS,HSC70-4,WAT,TRC,SELG,SLS,CNC,ACSL,LPIN,STRN-MLCK,SREBP,ZASP52,UNC-89,DNR1,TACC,NEDD4,CG30…
GO:BP	wing disc development	GO:0035220	0.0839695	0.0333704	1.82457e-07	6.73884	FRY,SHN,SVR,STY,GCLC,ANXB9,DL,TNC,H,PLE,FBL,FNG,DAW,MFS14,DLL,POT,MRP4,CG17278,DUOX,IRK1,MSK,NOP60B,PPCS,CG8369,TRC,LPIN,NEDD4,CG30069,MRTF,HOW,FHOS,AP,IF,PAX,PIO,TUP,GLI,FW,ADAMTS-B,SOX15,DOM,CRB,KN,SCAF,WMD,PKA-C1,BY,TAK1,CNK,IRK2,HR51,HUI,ASH2,RBSN-5,GRK
GO:BP	purine-containing compound metabolic process	GO:0072521	0.0641221	0.021648	1.85862e-07	6.73081	ACCOAS,MEN,ENO,PYK,IDH,GDH,SIK3,MUC,GPO1,TN,PGD,CG6145,ADSS,BUR,CG8306,FBL,RY,HMGS,LKRSDH,PPCS,ATPSYNF,CG5065,WAT,HEX-A,BLW,SARM,ACSL,ATPSYNBETA,GAPDH1,PDE11,PFK,ATPSYNGAMMA,CG5214,PGK,VHA68-2,NAPRT,ADGF-A,CG12268,DHPD,RUT,SDT,AC78C
GO:BP	localization	GO:0051179	0.309924	0.208094	1.94926e-07	6.71013	FASN1,SERCA,SPIN,CG3036,UQCR-C1,TTD14,SNU,CG33970,CG40006,SCAMC,ATF3,CACT,CG7720,SBM,VPS13,RAW,PUC,CHER,CG15096,LSD-1,CG10237,CG10345,ANXB9,DL,CG5059,NKCC,RICTOR,WDP,MCTP,SCP1,GUKH,VHA100-2,PICOT,BLOT,CG43693,MFS14,CG9399,BARK,PES,MYO31DF,ITP,LOCO,CG14439,MRP4,PAIN,SERT,CG8008,FATP3,TSP42EF,CG9717,CG31121,CG4797,MOL,CG1628,CG17278,EGR,CG13794,CG32091,CG10026,MFS9,ZNT77C,INSC,NHA1,EDL,IRK1,MME1,ES…
GO:BP	purine nucleotide metabolic process	GO:0006163	0.059542	0.0195089	3.42315e-07	6.46557	ACCOAS,MEN,ENO,PYK,IDH,GDH,SIK3,MUC,GPO1,TN,PGD,CG6145,ADSS,BUR,CG8306,FBL,HMGS,LKRSDH,PPCS,ATPSYNF,CG5065,WAT,HEX-A,BLW,SARM,ACSL,ATPSYNBETA,GAPDH1,PDE11,PFK,ATPSYNGAMMA,CG5214,PGK,VHA68-2,NAPRT,CG12268,RUT,SDT,AC78C
GO:BP	metamorphosis	GO:0007552	0.0931298	0.0399589	4.20992e-07	6.37573	EBPIII,FRY,SHN,SVR,CG43658,DIAP1,STY,KR-H1,PUC,GCLC,PURA,DL,PVR,TNC,H,BETATUB97EF,FBL,MMP1,FNG,DAW,DLL,POT,MYO31DF,JRA,SP1,CG17278,DUOX,MOE,MSK,DRM,PPCS,PHK-3,TRC,LPIN,NEDD4,CG30069,MRTF,HOW,FHOS,AP,IF,PIO,SQA,GLI,FW,ADAMTS-B,LBL,SS,TRAF4,KN,SCAF,WMD,PKA-C1,DAC,BY,TAK1,CNK,HR51,ASH2,RBSN-5,GRK
GO:BP	post-embryonic animal morphogenesis	GO:0009886	0.0916031	0.0390177	4.42038e-07	6.35454	FRY,SHN,SPIN,SVR,CG43658,DIAP1,STY,PUC,GCLC,PURA,DL,PVR,TNC,H,BETATUB97EF,FBL,MMP1,FNG,DAW,DLL,POT,MYO31DF,JRA,SP1,CG17278,DUOX,MOE,MSK,DRM,PPCS,TRC,LPIN,NEDD4,CG30069,MRTF,HOW,FHOS,AP,IF,PIO,SQA,GLI,FW,ADAMTS-B,LBL,SS,TRAF4,KN,SCAF,WMD,PKA-C1,BTSZ,DAC,BY,TAK1,CNK,HR51,ASH2,RBSN-5,GRK
GO:BP	nucleotide metabolic process	GO:0009117	0.0641221	0.0225892	7.24365e-07	6.14004	ACCOAS,MEN,ENO,PYK,IDH,GDH,SIK3,MUC,GPO1,TN,PGD,CG6145,ADSS,BUR,CG8306,FBL,SU(R),HMGS,R,LKRSDH,PPCS,ATPSYNF,CG5065,WAT,HEX-A,BLW,SARM,ACSL,ATPSYNBETA,GAPDH1,PDE11,PFK,ATPSYNGAMMA,CG5214,PGK,VHA68-2,NAPRT,R-L,CG12268,RUT,SDT,AC78C
GO:BP	nucleobase-containing small molecule metabolic process	GO:0055086	0.0717557	0.0272097	8.61988e-07	6.0645	ACCOAS,MEN,ENO,PYK,IDH,GDH,SIK3,MUC,GPO1,TN,PGD,CG6145,ADSS,BUR,CG8306,FBL,RY,SU(R),HMGS,R,B,LKRSDH,PPCS,ATPSYNF,CG5065,WAT,HEX-A,BLW,SARM,ACSL,ATPSYNBETA,GAPDH1,PDE11,PFK,ATPSYNGAMMA,CG5214,PGK,VHA68-2,NAPRT,CG12065,R-L,ADGF-A,CG12268,DHPD,RUT,SDT,AC78C
GO:BP	instar larval or pupal morphogenesis	GO:0048707	0.0885496	0.0377342	8.97292e-07	6.04707	FRY,SHN,SVR,CG43658,DIAP1,STY,PUC,GCLC,PURA,DL,PVR,TNC,H,BETATUB97EF,FBL,MMP1,FNG,DAW,DLL,POT,MYO31DF,JRA,SP1,CG17278,DUOX,MOE,MSK,DRM,PPCS,TRC,LPIN,NEDD4,CG30069,MRTF,HOW,FHOS,AP,IF,PIO,SQA,GLI,FW,ADAMTS-B,LBL,SS,TRAF4,KN,SCAF,WMD,PKA-C1,DAC,BY,TAK1,CNK,HR51,ASH2,RBSN-5,GRK
GO:BP	nucleoside phosphate metabolic process	GO:0006753	0.0641221	0.0228459	1.03372e-06	5.9856	ACCOAS,MEN,ENO,PYK,IDH,GDH,SIK3,MUC,GPO1,TN,PGD,CG6145,ADSS,BUR,CG8306,FBL,SU(R),HMGS,R,LKRSDH,PPCS,ATPSYNF,CG5065,WAT,HEX-A,BLW,SARM,ACSL,ATPSYNBETA,GAPDH1,PDE11,PFK,ATPSYNGAMMA,CG5214,PGK,VHA68-2,NAPRT,R-L,CG12268,RUT,SDT,AC78C
GO:BP	post-embryonic development	GO:0009791	0.116031	0.056473	1.06445e-06	5.97287	FRY,SHN,SPIN,SVR,CG43658,BEL,DIAP1,MLC2,STY,PUC,CHER,GCLC,PURA,DL,PVR,TNC,CREBA,H,BETATUB97EF,FBL,MMP1,FNG,DAW,DLL,POT,MYO31DF,JRA,SP1,MES2,CG17278,DUOX,UDE,MOE,PU,MSK,SPZ,DRM,PPCS,MIP,ASTA,TRC,LPIN,NEDD4,CG30069,MRTF,HOW,FHOS,AP,IF,PIO,SQA,GLI,FW,ADAMTS-B,HTL,LBL,SS,TRAF4,TSL,ADGF-A,KN,SCAF,WMD,PKA-C1,BTSZ,DAC,BY,TAK1,CNK,CYP4AA1,LWR,HR51,LGR3,ASH2,RBSN-5,GRK
GO:BP	generation of precursor metabolites and energy	GO:0006091	0.0610687	0.0211346	1.09082e-06	5.96225	FASN1,MEN,ENO,MACON1,PYK,KDN,GLYP,IDH,SIK3,GPO1,ND-49,TN,IRP-1B,PGD,CG5009,ATPSYNF,COX5B,COX8,ND-B12,CG9034,HEX-A,SRL,CG9253,BLW,ATPSYNBETA,GAPDH1,SDHA,ND-75,PFK,UQCR-C2,ARALAR1,CG5214,CG5028,PGK,SDHB,FUM1,CPT2,AKHR,ND-PDSW,ND-B14.5A
GO:BP	animal organ morphogenesis	GO:0009887	0.128244	0.0652007	1.10509e-06	5.9566	FRY,SHN,SVR,CG43658,DIAP1,STY,KR-H1,RAW,PUC,GCLC,PURA,DL,PVR,TNC,LAC,H,BETATUB97EF,FBL,MMP1,FNG,DAW,DLL,POT,MYO31DF,LANB2,JRA,SP1,CG17278,DUOX,JEB,MOE,AOP,MSK,DRM,PPCS,TRC,LPIN,DNR1,NEDD4,CG30069,FOXO,BDL,MRTF,NRV2,HOW,BAZ,FHOS,AP,SVP,IF,PIO,UIF,TUP,SQA,NSF2,GLI,FW,ADAMTS-B,LBL,GRIP,SS,TRAF4,RAU,CRB,TEN-M,SPG,NVY,KN,SCAF,WMD,PKA-C1,BTSZ,DAC,DIA,BY,TAK1,CNK,FKH,HR51,NS2,ASH2,RBSN-5,GRK,BTL
GO:BP	inorganic ion transmembrane transport	GO:0098660	0.0778626	0.0314024	1.4673e-06	5.83348	SERCA,NKCC,VHA100-2,PICOT,BLOT,PAIN,SERT,CG9717,CG13794,ZNT77C,NHA1,IRK1,MME1,ESP,CG33296,CG14401,SUBDUED,ZNT63C,ATPSYNF,FER1HCH,CLC-C,VHA36-1,TRPL,BLW,ATPSYNBETA,NEDD4,NCC69,NRV2,ARALAR1,NRV1,ATPSYNGAMMA,VHASFD,CLC-A,VHA68-2,RGK3,RH50,CG9338,ORT,CG12344,NOMPC,VHA36-3,NAAT1,NDAE1,DAT,PLC21C,CG11319,RGK1,ELK,RGK2,IRK2,VHA14-1
GO:BP	monoatomic cation transport	GO:0006812	0.080916	0.0338838	2.68165e-06	5.5716	SERCA,CG7720,NKCC,VHA100-2,PICOT,BLOT,PAIN,SERT,CG13794,ZNT77C,NHA1,IRK1,MME1,CG33296,CG14401,MCO1,SUBDUED,ENT2,ZNT63C,ATPSYNF,FER1HCH,VHA36-1,SELG,TRPL,BLW,ATPSYNBETA,NEDD4,CG4928,NCC69,NRV2,ARALAR1,NRV1,ATPSYNGAMMA,VHASFD,VHA68-2,RGK3,CG5687,CG9338,NOMPC,VHA36-3,NAAT1,NDAE1,CG1358,DAT,PLC21C,CG11319,RDGB,RGK1,ELK,RGK2,IRK2,VHA14-1,CNGA
GO:BP	imaginal disc-derived appendage morphogenesis	GO:0035114	0.0717557	0.0284076	3.63103e-06	5.43997	FRY,SHN,SVR,CG43658,DIAP1,STY,GCLC,PURA,DL,TNC,H,FBL,FNG,DAW,DLL,POT,SP1,CG17278,DUOX,MSK,DRM,PPCS,TRC,LPIN,NEDD4,CG30069,MRTF,HOW,FHOS,AP,IF,PIO,GLI,FW,ADAMTS-B,LBL,SS,KN,WMD,PKA-C1,DAC,BY,CNK,HR51,ASH2,RBSN-5,GRK
GO:BP	transport	GO:0006810	0.261069	0.172927	3.85492e-06	5.41398	SERCA,SPIN,CG3036,TTD14,SNU,CG33970,CG40006,SCAMC,CG7720,SBM,VPS13,PUC,CHER,CG15096,LSD-1,CG10237,CG10345,ANXB9,CG5059,NKCC,WDP,MCTP,SCP1,VHA100-2,PICOT,BLOT,CG43693,MFS14,CG9399,BARK,PES,MYO31DF,ITP,CG14439,MRP4,PAIN,SERT,CG8008,FATP3,CG9717,CG31121,CG4797,MOL,CG1628,EGR,CG13794,CG32091,CG10026,MFS9,ZNT77C,NHA1,EDL,IRK1,MME1,ESP,CG33296,CG14694,CG5104,CG14401,MCO1,APOLTP,TIM,MOE,CG13784,PST,AOP,…
GO:BP	appendage morphogenesis	GO:0035107	0.0717557	0.0285788	4.42284e-06	5.3543	FRY,SHN,SVR,CG43658,DIAP1,STY,GCLC,PURA,DL,TNC,H,FBL,FNG,DAW,DLL,POT,SP1,CG17278,DUOX,MSK,DRM,PPCS,TRC,LPIN,NEDD4,CG30069,MRTF,HOW,FHOS,AP,IF,PIO,GLI,FW,ADAMTS-B,LBL,SS,KN,WMD,PKA-C1,DAC,BY,CNK,HR51,ASH2,RBSN-5,GRK
GO:BP	imaginal disc-derived appendage development	GO:0048737	0.0717557	0.0290066	7.18087e-06	5.14382	FRY,SHN,SVR,CG43658,DIAP1,STY,GCLC,PURA,DL,TNC,H,FBL,FNG,DAW,DLL,POT,SP1,CG17278,DUOX,MSK,DRM,PPCS,TRC,LPIN,NEDD4,CG30069,MRTF,HOW,FHOS,AP,IF,PIO,GLI,FW,ADAMTS-B,LBL,SS,KN,WMD,PKA-C1,DAC,BY,CNK,HR51,ASH2,RBSN-5,GRK
GO:BP	appendage development	GO:0048736	0.0717557	0.0292633	9.5494e-06	5.02002	FRY,SHN,SVR,CG43658,DIAP1,STY,GCLC,PURA,DL,TNC,H,FBL,FNG,DAW,DLL,POT,SP1,CG17278,DUOX,MSK,DRM,PPCS,TRC,LPIN,NEDD4,CG30069,MRTF,HOW,FHOS,AP,IF,PIO,GLI,FW,ADAMTS-B,LBL,SS,KN,WMD,PKA-C1,DAC,BY,CNK,HR51,ASH2,RBSN-5,GRK
GO:BP	post-embryonic appendage morphogenesis	GO:0035120	0.0687023	0.0276375	1.30736e-05	4.8836	FRY,SHN,SVR,CG43658,STY,GCLC,PURA,DL,TNC,H,FBL,FNG,DAW,DLL,POT,SP1,CG17278,DUOX,MSK,DRM,PPCS,TRC,LPIN,NEDD4,CG30069,MRTF,HOW,FHOS,AP,IF,PIO,GLI,FW,ADAMTS-B,LBL,SS,KN,WMD,PKA-C1,BY,CNK,HR51,ASH2,RBSN-5,GRK
GO:BP	establishment of localization	GO:0051234	0.268702	0.182853	1.63895e-05	4.78543	SERCA,SPIN,CG3036,UQCR-C1,TTD14,SNU,CG33970,CG40006,SCAMC,CG7720,SBM,VPS13,PUC,CHER,CG15096,LSD-1,CG10237,CG10345,ANXB9,CG5059,NKCC,WDP,MCTP,SCP1,VHA100-2,PICOT,BLOT,CG43693,MFS14,CG9399,BARK,PES,MYO31DF,ITP,CG14439,MRP4,PAIN,SERT,CG8008,FATP3,CG9717,CG31121,CG4797,MOL,CG1628,CG17278,EGR,CG13794,CG32091,CG10026,MFS9,ZNT77C,INSC,NHA1,EDL,IRK1,MME1,ESP,CG33296,CG14694,CG5104,CG14401,MCO1,APOLTP,TIM…
GO:BP	regulation of multicellular organismal process	GO:0051239	0.103817	0.0515102	1.92173e-05	4.71631	SHN,PDK1,CWO,DIAP1,STY,CACT,PUC,CHER,PURA,DL,BGM,CLK,RICTOR,PVR,PLE,DAW,ITP,PAIN,JRA,SIDPN,EGR,INSC,CG14401,TIM,AOP,PU,CG1572,CG5033,MIP,SELG,SLS,EAAT1,NEDD4,CG4928,FOXO,HOW,FER,RTGEF,GLI,ADAMTS-B,CG9338,HTL,CG12344,DOM,CRB,TSL,DRIP,CG10939,KN,SCAF,UNC-104,RUT,PKA-C1,BTSZ,SNPF,PKA-R1,DOP1R2,5-HT1A,KTL,DIA,FKH,LWR,HR51,HDAC1,LGR3,CG14220,GRK,BTL
GO:BP	organophosphate metabolic process	GO:0019637	0.0854962	0.0390177	2.16327e-05	4.66489	ACCOAS,MEN,ENO,PYK,IDH,GPDH1,GDH,SIK3,OYS,PECT,MUC,GPO1,CG2201,TN,PGD,CG6145,ADSS,BUR,CG8306,FBL,RY,SU(R),HMGS,R,GK2,LKRSDH,MOCS1,AGPAT2,CG7365,PISD,PPCS,ATPSYNF,CG5065,WAT,HEX-A,PUML,BLW,SARM,ACSL,ATPSYNBETA,CG18135,GAPDH1,PDE11,PFK,ATPSYNGAMMA,CG5214,PGK,VHA68-2,NAPRT,CG12746,R-L,CG12268,RUT,SDT,RDGB,AC78C
GO:BP	cellular anatomical entity morphogenesis	GO:0032989	0.100763	0.0496278	2.37465e-05	4.6244	FRY,SHN,CWO,MLC2,DSX,CACT,PUC,CHER,ZASP66,PRM,S6K,GCLC,PURA,ZFH1,RICTOR,TN,BUR,CG6701,DAW,CDC7,KON,JRA,JEB,MOE,TIG,IMPL2,SPZ,PPCS,HSC70-4,TRC,SLS,CNC,ACSL,STRN-MLCK,ZASP52,UNC-89,NEDD4,FOXO,BDL,HOW,UZIP,AP,FER,IF,PAX,TUP,HAM,HTL,SS,PBL,DOM,CRB,CHB,TEN-M,ROBO3,NVY,KN,UNC-104,RUT,DAC,DIA,HR51,HDAC1,ASH2,GRK,BTL
GO:BP	anatomical structure development	GO:0048856	0.326718	0.235646	3.21638e-05	4.49263	SERCA,EBPIII,FRY,CLIP-190,SHN,SPIN,PDK1,SVR,CWO,SNU,CG43658,BEL,DIAP1,MLC2,HR38,DSX,CPR,ATF3,STY,CACT,KR-H1,RAW,PUC,BON,CHER,OYS,ACTN,ZASP66,PRM,S6K,GCLC,PURA,ANXB9,DL,SR,ZFH1,CLK,CORO,RICTOR,WDP,PVR,TNC,TN,LAC,CREBA,MP20,H,PLE,BUR,BETATUB97EF,FBL,CPR67B,MMP1,CG6701,CG17111,FNG,DAW,MFS14,DLL,POT,BARK,MYO31DF,LOCO,MRP4,CDC7,LANB2,KON,JRA,SP1,SUG,MES2,SIDPN,SLOW,CG17278,EGR,SOBP,WNT6,NEUROCHONDRIN,…
GO:BP	wing disc morphogenesis	GO:0007472	0.0625954	0.0248995	4.2951e-05	4.36703	FRY,SHN,SVR,STY,GCLC,DL,TNC,H,FBL,FNG,DAW,DLL,POT,CG17278,DUOX,MSK,PPCS,TRC,LPIN,NEDD4,CG30069,MRTF,HOW,FHOS,AP,IF,PIO,GLI,FW,ADAMTS-B,KN,SCAF,WMD,PKA-C1,BY,TAK1,CNK,HR51,ASH2,RBSN-5,GRK
GO:BP	inorganic cation transmembrane transport	GO:0098662	0.0656489	0.0268675	4.62987e-05	4.33443	SERCA,NKCC,VHA100-2,BLOT,PAIN,SERT,CG13794,ZNT77C,NHA1,IRK1,MME1,CG33296,CG14401,ZNT63C,ATPSYNF,FER1HCH,VHA36-1,TRPL,BLW,ATPSYNBETA,NEDD4,NCC69,NRV2,ARALAR1,NRV1,ATPSYNGAMMA,VHASFD,VHA68-2,RGK3,RH50,CG9338,NOMPC,VHA36-3,NAAT1,NDAE1,DAT,PLC21C,CG11319,RGK1,ELK,RGK2,IRK2,VHA14-1
GO:BP	ribonucleotide metabolic process	GO:0009259	0.0503817	0.0177976	5.40819e-05	4.26695	ACCOAS,ENO,PYK,MUC,TN,ADSS,BUR,CG8306,FBL,SU(R),HMGS,R,LKRSDH,PPCS,ATPSYNF,CG5065,WAT,HEX-A,BLW,ACSL,ATPSYNBETA,GAPDH1,PDE11,PFK,ATPSYNGAMMA,CG5214,PGK,VHA68-2,R-L,CG12268,RUT,SDT,AC78C
GO:BP	developmental process	GO:0032502	0.341985	0.250963	5.59066e-05	4.25254	SERCA,EBPIII,FRY,CLIP-190,SHN,SPIN,PDK1,SVR,CWO,SNU,CG43658,BEL,TREH,DIAP1,MLC2,HR38,DSX,CPR,ATF3,STY,CACT,KR-H1,RAW,PUC,BON,CHER,OYS,ACTN,ZASP66,PRM,S6K,GCLC,PURA,ANXB9,DL,SR,ZFH1,CLK,CORO,RICTOR,WDP,PVR,TNC,TN,LAC,CREBA,MP20,H,PLE,BUR,BETATUB97EF,FBL,CPR67B,MMP1,CG6701,CG17111,FNG,DAW,MFS14,DLL,POT,BARK,MYO31DF,LOCO,MRP4,CDC7,LANB2,KON,JRA,SP1,SUG,MES2,SIDPN,SLOW,CG17278,EGR,SOBP,WNT6,NEUROCHON…
GO:BP	determination of adult lifespan	GO:0008340	0.0442748	0.0144605	6.13659e-05	4.21207	MEN,GLYP,PUC,CHER,S6K,MTPALPHA,TRXR-1,RY,DAW,THOR,MRP4,MSRA,TSP42EF,AOP,IMPL2,JAFRAC1,SAM-S,SELG,CNC,EAAT1,FOXO,VHASFD,MTPBETA,EDEM1,HSP68,RUT,SNPF,FKH,HDAC1
GO:BP	actin filament-based process	GO:0030029	0.0687023	0.0290922	6.2849e-05	4.2017	SVR,CG43658,MLC2,PUC,CHER,ZASP66,PRM,DL,CORO,TN,GUKH,CG1674,MP20,MYO31DF,LOCO,CG5023,KON,MOE,PPCS,SLS,SVIL,CAP,ZASP52,UNC-89,NEDD4,MRTF,HOW,FHOS,FER,IF,CG42673,L(3)05822,MLC-C,CG33521,PBL,TRAF4,CRB,TSL,CG10939,ARPC2,PKA-C1,BTSZ,PKA-R1,DIA,CG42319
GO:BP	response to stimulus	GO:0050896	0.351145	0.259776	6.62383e-05	4.17889	FASN1,CG9674,EBPIII,MEN,PYK,GLYP,IDH,SHN,SPIN,PDK1,VIR-1,DOR,TTD14,PINO,CG43658,PLI,DIAP1,HR38,CPR,ATF3,STY,CACT,KR-H1,RAW,PUC,SIK3,CHER,GSTD1,S6K,GCLC,PURA,CG14207,OBP56D,CG10345,MTPALPHA,TRXR-1,DL,CG5059,LUBEL,BGM,CLK,CORO,RICTOR,WDP,PVR,TNC,IRP-1B,H,PLE,PRAS40,BUR,ACT87E,FBL,MMP1,FNG,DAW,THOR,MFS14,BARK,CG8745,ITP,LOCO,B,MRP4,PAIN,CDC7,LKRSDH,CG3630,GILT1,MSRA,ANXB11,JRA,PHU,PLH,SPN42DD,TEP3,S…
GO:BP	nicotinamide nucleotide metabolic process	GO:0046496	0.0244275	0.00496278	7.38093e-05	4.13189	MEN,ENO,PYK,IDH,GDH,SIK3,GPO1,TN,PGD,CG6145,HEX-A,SARM,GAPDH1,PFK,PGK,NAPRT
GO:BP	pyridine nucleotide metabolic process	GO:0019362	0.0244275	0.00496278	7.38093e-05	4.13189	MEN,ENO,PYK,IDH,GDH,SIK3,GPO1,TN,PGD,CG6145,HEX-A,SARM,GAPDH1,PFK,PGK,NAPRT
GO:BP	metal ion transport	GO:0030001	0.0625954	0.0254129	7.66602e-05	4.11543	SERCA,CG7720,NKCC,PICOT,BLOT,PAIN,SERT,CG13794,ZNT77C,NHA1,IRK1,MME1,CG33296,CG14401,MCO1,ENT2,ZNT63C,FER1HCH,SELG,TRPL,NEDD4,CG4928,NCC69,NRV2,ARALAR1,NRV1,RGK3,CG5687,CG9338,NOMPC,NAAT1,NDAE1,CG1358,DAT,PLC21C,CG11319,RDGB,RGK1,ELK,RGK2,IRK2
GO:BP	monoatomic ion transport	GO:0006811	0.0946565	0.0469753	8.64448e-05	4.06326	SERCA,CG3036,CG7720,CG15096,NKCC,VHA100-2,PICOT,BLOT,MFS14,PAIN,SERT,CG13794,MFS9,ZNT77C,NHA1,IRK1,MME1,CG33296,CG14401,MCO1,SUBDUED,ENT2,ZNT63C,ATPSYNF,FER1HCH,CLC-C,VHA36-1,SELG,TRPL,BLW,ATPSYNBETA,NEDD4,CG4928,NCC69,NRV2,ARALAR1,NRV1,ATPSYNGAMMA,VHASFD,CLC-A,VHA68-2,RGK3,CG5687,CG9338,ORT,CG12344,NOMPC,VHA36-3,NAAT1,NTR,NDAE1,CG1358,DAT,PLC21C,CG11319,RDGB,RGK1,ELK,RGK2,IRK2,VHA14-1,CNGA
GO:BP	monoatomic cation transmembrane transport	GO:0098655	0.0671756	0.0284932	9.29929e-05	4.03155	SERCA,NKCC,VHA100-2,BLOT,PAIN,SERT,CG13794,ZNT77C,NHA1,IRK1,MME1,CG33296,CG14401,SUBDUED,ZNT63C,ATPSYNF,FER1HCH,VHA36-1,TRPL,BLW,ATPSYNBETA,NEDD4,NCC69,NRV2,ARALAR1,NRV1,ATPSYNGAMMA,VHASFD,VHA68-2,RGK3,CG9338,NOMPC,VHA36-3,NAAT1,NDAE1,DAT,PLC21C,CG11319,RGK1,ELK,RGK2,IRK2,VHA14-1,CNGA
GO:BP	system development	GO:0048731	0.201527	0.130059	9.3548e-05	4.02897	FRY,SHN,SPIN,PDK1,CWO,DIAP1,DSX,ATF3,STY,CACT,KR-H1,RAW,PUC,CHER,S6K,GCLC,PURA,DL,SR,ZFH1,RICTOR,WDP,PVR,TNC,LAC,CREBA,PLE,BUR,MMP1,CG6701,FNG,DAW,DLL,POT,BARK,MYO31DF,LOCO,LANB2,JRA,SUG,SIDPN,SLOW,EGR,SOBP,WNT6,NEUROCHONDRIN,INSC,EDL,CG17221,JEB,MOE,AOP,PU,TIG,MSK,IMPL2,SPZ,DRM,HSC70-4,WAT,QM,TRC,KNRL,IMD,CNC,ACSL,STRN-MLCK,DNR1,NEDD4,FOXO,BDL,MRTF,NRV2,HOW,UZIP,BAZ,FHOS,AP,FER,SVP,IF,PIO,VHA68-…
GO:BP	imaginal disc-derived wing morphogenesis	GO:0007476	0.059542	0.0237871	0.000104076	3.98265	FRY,SHN,SVR,STY,GCLC,DL,TNC,H,FBL,FNG,DAW,DLL,POT,CG17278,DUOX,MSK,PPCS,TRC,LPIN,NEDD4,CG30069,MRTF,HOW,FHOS,AP,IF,PIO,GLI,FW,ADAMTS-B,KN,WMD,PKA-C1,BY,CNK,HR51,ASH2,RBSN-5,GRK
GO:BP	ribose phosphate metabolic process	GO:0019693	0.0503817	0.0183965	0.000121689	3.91475	ACCOAS,ENO,PYK,MUC,TN,ADSS,BUR,CG8306,FBL,SU(R),HMGS,R,LKRSDH,PPCS,ATPSYNF,CG5065,WAT,HEX-A,BLW,ACSL,ATPSYNBETA,GAPDH1,PDE11,PFK,ATPSYNGAMMA,CG5214,PGK,VHA68-2,R-L,CG12268,RUT,SDT,AC78C
GO:BP	cellular homeostasis	GO:0019725	0.0519084	0.0193377	0.000128523	3.89102	FASN1,SERCA,CG9674,TRXR-1,BGM,NKCC,ZFH1,TN,IRP-1B,VHA100-2,DAW,EGR,ZNT77C,MME1,ZNT63C,JAFRAC1,HEX-A,FER1HCH,CLC-C,SRL,SELG,TRPL,NCC69,NRV2,FHOS,NRV1,PGK,VHA68-2,UIF,NDAE1,DAT,PLC21C,DOP1R2,SYX17
GO:BP	muscle cell differentiation	GO:0042692	0.0335878	0.00941217	0.000157257	3.80339	MLC2,STY,CHER,ZASP66,PRM,ZFH1,TN,MP20,KON,JEB,AOP,SLS,ZASP52,UNC-89,NEDD4,HOW,IF,PAX,TUP,HTL,KN,DIA
GO:BP	muscle cell development	GO:0055001	0.0244275	0.00521947	0.000159877	3.79621	MLC2,STY,CHER,ZASP66,PRM,TN,KON,AOP,SLS,ZASP52,UNC-89,NEDD4,HOW,IF,HTL,DIA
GO:BP	pyridine-containing compound metabolic process	GO:0072524	0.0244275	0.0053906	0.000260016	3.585	MEN,ENO,PYK,IDH,GDH,SIK3,GPO1,TN,PGD,CG6145,HEX-A,SARM,GAPDH1,PFK,PGK,NAPRT
GO:BP	signaling	GO:0023052	0.244275	0.169162	0.000313905	3.5032	SERCA,MEN,GLYP,SHN,SPIN,PDK1,DOR,CG43658,PLI,DIAP1,HR38,STY,CACT,RAW,PUC,SIK3,S6K,PURA,DL,CG5059,LUBEL,RICTOR,WDP,MCTP,PVR,TNC,H,PRAS40,BUR,FNG,DAW,THOR,ITP,LOCO,CDC7,LKRSDH,CG3630,JRA,CG17278,EGR,WNT6,NEUROCHONDRIN,DUOX,EDL,LRT,CG14401,TRE1,JEB,TIM,AOP,CG32276,IMPL2,SPZ,ENT2,LGR1,MIP,ASTA,HSC70-4,DGK,KRZ,TRC,KNRL,SRL,CG43324,IMD,CG4968,TRPL,SARM,ACSL,LPIN,STRN-MLCK,PDE11,EAAT1,SREBP,CG2082,DNR1,…
GO:BP	actin cytoskeleton organization	GO:0030036	0.0641221	0.0278942	0.000370915	3.43073	SVR,CG43658,MLC2,PUC,CHER,ZASP66,PRM,DL,CORO,TN,GUKH,CG1674,MP20,MYO31DF,LOCO,CG5023,KON,MOE,PPCS,SLS,SVIL,CAP,ZASP52,UNC-89,NEDD4,MRTF,HOW,FHOS,FER,IF,CG42673,L(3)05822,CG33521,PBL,CRB,CG10939,ARPC2,PKA-C1,BTSZ,PKA-R1,DIA,CG42319
GO:BP	purine ribonucleotide metabolic process	GO:0009150	0.0458015	0.0165996	0.000389528	3.40946	ACCOAS,ENO,PYK,MUC,TN,ADSS,BUR,CG8306,FBL,HMGS,LKRSDH,PPCS,ATPSYNF,CG5065,WAT,HEX-A,BLW,ACSL,ATPSYNBETA,GAPDH1,PDE11,PFK,ATPSYNGAMMA,CG5214,PGK,VHA68-2,CG12268,RUT,SDT,AC78C
GO:BP	cell communication	GO:0007154	0.248855	0.173697	0.000389863	3.40909	SERCA,MEN,GLYP,SHN,SPIN,PDK1,DOR,CG43658,PLI,DIAP1,HR38,STY,CACT,RAW,PUC,SIK3,S6K,PURA,DL,CG5059,LUBEL,RICTOR,WDP,MCTP,PVR,TNC,H,PRAS40,BUR,FNG,DAW,THOR,ITP,LOCO,CDC7,LKRSDH,CG3630,JRA,SUG,CG17278,EGR,WNT6,NEUROCHONDRIN,DUOX,EDL,LRT,CG14401,TRE1,JEB,TIM,AOP,CG32276,IMPL2,SPZ,ENT2,LGR1,MIP,ASTA,HSC70-4,DGK,KRZ,TRC,KNRL,SRL,CG43324,IMD,CG4968,TRPL,SARM,ACSL,LPIN,STRN-MLCK,PDE11,EAAT1,SREBP,CG2082,D…
GO:BP	cellular lipid metabolic process	GO:0044255	0.0778626	0.0372208	0.000413601	3.38342	FASN1,SERCA,GPDH1,SIK3,OYS,PECT,LSD-1,CG2201,MTPALPHA,CG5191,BGM,CG5009,RY,THOR,HMGS,CG33110,GK2,CG12512,FATP3,CG3842,AGPAT2,CG7365,PISD,CROT,MIP,ASTA,PDH,CG5065,DGK,QM,PUML,SPLY,HACD1,BETA4GALNACTA,ACSL,CG18135,LPIN,SREBP,FOXO,CG17646,MTPBETA,CG12746,CPT2,CG7900,BALDSPOT,E,CG7997,RDGB,CG31522,CG31523,CG5326
GO:BP	circadian rhythm	GO:0007623	0.0412214	0.0141183	0.000474201	3.32404	CWO,SIK3,PURA,CG31324,BGM,CLK,FBL,ITP,IRK1,CG14401,TIM,FOXO,CG9338,CG12344,NPF,CG6123,NVY,DAT,E,RUT,PKA-C1,PLC21C,SNPF,DOP1R2,5-HT1A,AC78C,HR51
GO:BP	cellular response to chemical stimulus	GO:0070887	0.080916	0.0397022	0.000556052	3.25488	FASN1,GLYP,IDH,PDK1,DOR,HR38,CACT,PUC,SIK3,GSTD1,S6K,TRXR-1,RICTOR,PRAS40,DAW,THOR,LKRSDH,MSRA,PLH,SUG,EGR,DUOX,LRT,CG32276,SOD3,IMPL2,DRAT,JAFRAC1,LGR1,HSC70-4,SRL,TRPL,LPIN,FOXO,MRTF,TAB2,CG12290,EDEM1,RH50,KEAP1,HSP68,SS,TRAF4,AKHR,PKA-C1,DOP1R2,PXN,5-HT1A,EMB,TAK1,CNK,FKH,LGR3
GO:BP	rhythmic process	GO:0048511	0.0412214	0.0143749	0.000686058	3.16364	CWO,SIK3,PURA,CG31324,BGM,CLK,FBL,ITP,IRK1,CG14401,TIM,FOXO,CG9338,CG12344,NPF,CG6123,NVY,DAT,E,RUT,PKA-C1,PLC21C,SNPF,DOP1R2,5-HT1A,AC78C,HR51
GO:BP	multicellular organism development	GO:0007275	0.270229	0.194318	0.000776945	3.10961	EBPIII,FRY,CLIP-190,SHN,SPIN,PDK1,SVR,CWO,SNU,CG43658,BEL,DIAP1,MLC2,HR38,DSX,CPR,ATF3,STY,CACT,KR-H1,RAW,PUC,CHER,OYS,S6K,GCLC,PURA,ANXB9,DL,SR,ZFH1,CLK,RICTOR,WDP,PVR,TNC,LAC,CREBA,H,PLE,BUR,BETATUB97EF,FBL,CPR67B,MMP1,CG6701,FNG,DAW,MFS14,DLL,POT,BARK,MYO31DF,LOCO,MRP4,CDC7,LANB2,JRA,SP1,SUG,MES2,SIDPN,SLOW,CG17278,EGR,SOBP,WNT6,NEUROCHONDRIN,DUOX,UDE,INSC,EDL,CG17221,JEB,TIM,MOE,AOP,PU,TIG,MS…
GO:BP	myofibril assembly	GO:0030239	0.0198473	0.00402156	0.00121847	2.91419	MLC2,CHER,ZASP66,PRM,TN,KON,SLS,ZASP52,UNC-89,NEDD4,HOW,IF,DIA
GO:BP	striated muscle cell development	GO:0055002	0.0198473	0.00402156	0.00121847	2.91419	MLC2,CHER,ZASP66,PRM,TN,KON,SLS,ZASP52,UNC-89,NEDD4,HOW,IF,DIA
GO:BP	behavior	GO:0007610	0.0946565	0.0506546	0.00123363	2.90882	SERCA,EBPIII,KDN,SPIN,SVR,PINO,DSX,SIK3,CHER,MUC,S6K,PURA,GPO1,OBP56D,BGM,CLK,TN,PLE,MENG,FBL,ITP,B,PAIN,NEP2,MOCS1,MOL,ROOT,AGPAT2,IRK1,ESP,CG14401,TIM,PST,ENT2,MIP,KRZ,BETA4GALNACTA,EAAT1,FOXO,DCX-EMAP,CG9338,ORT,SS,NPF,NOMPC,DRIP,CG6123,DCR-2,DAT,E,UNC-104,RUT,PKA-C1,PLC21C,RGK1,SNPF,PKA-R1,DOP1R2,5-HT1A,KTL,HR51,HEC
GO:BP	muscle structure development	GO:0061061	0.0503817	0.0203645	0.00132741	2.87699	MLC2,STY,CHER,ZASP66,PRM,SR,ZFH1,CORO,TN,MP20,KON,SLOW,INSC,JEB,AOP,MSK,SPZ,SPLY,SLS,CAP,ZASP52,UNC-89,NEDD4,HOW,AP,IF,PAX,TUP,HTL,GRIP,KN,DIA,CG42319
GO:BP	tissue development	GO:0009888	0.103817	0.0576709	0.00141157	2.8503	SERCA,FRY,SHN,DIAP1,STY,RAW,PUC,BON,CHER,ZASP66,PRM,DL,SR,ZFH1,PVR,TNC,LAC,MMP1,FNG,DAW,MYO31DF,LOCO,LANB2,JRA,INSC,JEB,MOE,AOP,MSK,PPCS,HSC70-4,QM,TRC,SLS,NEDD4,MRTF,HOW,BAZ,FHOS,FER,SVP,IF,TUP,SQA,CG44245,NSF2,GLI,STAC,FW,SOSIE,HTL,LBL,PBL,TRAF4,CRB,TSL,SCAF,SEC5,SDT,BTSZ,EIF3B,DIA,TAK1,FKH,LWR,RBSN-5,GRK,BTL
GO:BP	cellular response to organic substance	GO:0071310	0.0564885	0.0243005	0.0014227	2.84689	FASN1,GLYP,PDK1,DOR,HR38,CACT,PUC,SIK3,S6K,RICTOR,PRAS40,DAW,THOR,LKRSDH,EGR,DUOX,CG32276,IMPL2,DRAT,LGR1,HSC70-4,SRL,LPIN,FOXO,TAB2,CG12290,EDEM1,HSP68,TRAF4,AKHR,PKA-C1,DOP1R2,5-HT1A,TAK1,CNK,FKH,LGR3
GO:BP	response to oxygen-containing compound	GO:1901700	0.0656489	0.0303756	0.00146172	2.83514	FASN1,PYK,GLYP,PDK1,DOR,HR38,KR-H1,SIK3,CHER,S6K,CLK,RICTOR,PLE,PRAS40,DAW,THOR,ITP,LKRSDH,PLH,DUOX,AGPAT2,SOD3,IMPL2,SPZ,DRAT,JAFRAC1,SRL,LPIN,PFK,FOXO,CG12290,EDEM1,ORT,RUT,PKA-C1,PKA-R1,DOP1R2,5-HT1A,TAK1,CNK,AC78C,FKH,ASH2
GO:BP	cell morphogenesis	GO:0000902	0.0916031	0.0486866	0.00148064	2.82955	FRY,SHN,CWO,DSX,RAW,CHER,S6K,GCLC,PURA,DL,ZFH1,RICTOR,BUR,CG6701,CG17111,DAW,JEB,MOE,TIG,IMPL2,SPZ,PPCS,HSC70-4,TRC,CNC,ACSL,STRN-MLCK,SREBP,NEDD4,FOXO,BDL,UZIP,BAZ,AP,FER,IF,TUP,HAM,HTL,SS,PBL,TRAF4,DOM,CRB,CHB,TSL,ARPC2,TEN-M,ROBO3,NVY,KN,SCAF,UNC-104,RUT,DAC,DIA,HR51,HDAC1,ASH2,BTL
GO:BP	cell migration	GO:0016477	0.0610687	0.027552	0.00181508	2.7411	SPIN,DIAP1,PUC,OYS,DL,SR,ZFH1,PVR,PLE,LANB2,EGR,LRT,TRE1,JEB,AOP,PU,PPCS,JAFRAC1,QM,KNRL,MRTF,HOW,BAZ,FHOS,IF,L(3)05822,GLI,SOSIE,HTL,LBL,PBL,CG45105,CHB,SEC5,CNK,LWR,KNI,CG14220,GRK,BTL
GO:BP	response to external stimulus	GO:0009605	0.128244	0.0770942	0.00200497	2.69789	CG9674,EBPIII,GLYP,SPIN,VIR-1,PLI,CACT,KR-H1,PUC,SIK3,S6K,CG10345,MTPALPHA,LUBEL,CLK,CORO,RICTOR,PVR,PLE,DAW,THOR,LOCO,PAIN,GILT1,JRA,SPN42DD,TEP3,SUG,ROOT,EGR,DUOX,INSC,LRT,TIM,SUBDUED,IMPL2,SPZ,NIMC1,JAFRAC1,PHK-3,FER1HCH,KRZ,IMD,CG4968,TRPL,SARM,LPIN,DNR1,FOXO,NCC69,FER,SVP,NPL4,TM9SF2,TAB2,DCX-EMAP,CPT2,FW,HSP68,HTL,ORT,TRAF4,NPF,NOMPC,TG,ADGF-A,TEN-M,ROBO3,DCR-2,AKHR,KN,NPC2H,SEC5,GRASS,PLC2…
GO:BP	small molecule catabolic process	GO:0044282	0.0396947	0.0144605	0.00257706	2.58888	SERCA,ENO,GDH,CG6910,MTPALPHA,CG5191,CG5009,GK2,LKRSDH,PPL,CG11241,CG5955,CG8665,CG3597,CROT,SARDH,LPIN,CG1640,PFK,CG5214,CG1673,MTPBETA,CPT2,CG5599,CG7900,ADGF-A
GO:BP	NAD metabolic process	GO:0019674	0.0122137	0.00162574	0.00432008	2.36451	MEN,ENO,GDH,GPO1,CG6145,SARM,PFK,NAPRT
GO:BP	regulation of monoatomic ion transmembrane transport	GO:0034765	0.021374	0.00530504	0.00661897	2.17921	SERCA,IRK1,CG14401,NEDD4,NRV2,NRV1,CLC-A,RGK3,CG9338,CG11319,RGK1,ELK,RGK2,IRK2
GO:BP	regulation of monoatomic ion transport	GO:0043269	0.0244275	0.00684521	0.00783914	2.10573	SERCA,IRK1,CG14401,ENT2,NEDD4,CG4928,NRV2,NRV1,CLC-A,RGK3,CG9338,CG11319,RGK1,ELK,RGK2,IRK2
GO:BP	phosphate-containing compound metabolic process	GO:0006796	0.132824	0.0835116	0.00794031	2.10016	ACCOAS,MEN,ENO,PYK,FRY,IDH,GPDH1,PDK1,SVR,GDH,STY,PUC,BON,SIK3,OYS,PECT,MUC,S6K,GPO1,CG2201,PVR,TN,PGD,CG6145,PRAS40,ADSS,BUR,CG8306,MENG,FBL,RY,SU(R),HMGS,R,GK2,CDC7,LKRSDH,PHU,CG4733,MOCS1,AGPAT2,CG9451,EDL,CG7365,PISD,PPCS,ATPSYNF,CG5065,WAT,HEX-A,DGK,TRC,PUML,BLW,SARM,ACSL,ATPSYNBETA,CG18135,STRN-MLCK,GAPDH1,PDE11,UNC-89,PFK,CG41520,FER,ATPSYNGAMMA,CG5214,PGK,VHA68-2,NAPRT,PKCDELTA,SQA,CG1274…
GO:BP	regulation of transmembrane transport	GO:0034762	0.021374	0.0053906	0.00807817	2.09269	SERCA,IRK1,CG14401,NEDD4,NRV2,NRV1,CLC-A,RGK3,CG9338,CG11319,RGK1,ELK,RGK2,IRK2
GO:BP	organic acid catabolic process	GO:0016054	0.0305344	0.0100967	0.00850422	2.07037	SERCA,GDH,MTPALPHA,CG5191,CG5009,LKRSDH,PPL,CG11241,CG5955,CG8665,CROT,SARDH,LPIN,CG1640,CG5214,CG1673,MTPBETA,CPT2,CG5599,CG7900
GO:BP	carboxylic acid catabolic process	GO:0046395	0.0305344	0.0100967	0.00850422	2.07037	SERCA,GDH,MTPALPHA,CG5191,CG5009,LKRSDH,PPL,CG11241,CG5955,CG8665,CROT,SARDH,LPIN,CG1640,CG5214,CG1673,MTPBETA,CPT2,CG5599,CG7900
GO:BP	cell projection morphogenesis	GO:0048858	0.0748092	0.0390177	0.00852649	2.06923	FRY,SHN,CWO,DSX,CHER,S6K,GCLC,PURA,ZFH1,RICTOR,BUR,CG6701,DAW,JEB,MOE,TIG,IMPL2,SPZ,HSC70-4,TRC,CNC,ACSL,STRN-MLCK,NEDD4,FOXO,BDL,UZIP,AP,FER,IF,TUP,HAM,HTL,SS,PBL,DOM,CRB,CHB,TEN-M,ROBO3,NVY,KN,UNC-104,RUT,DAC,HR51,HDAC1,ASH2,BTL
GO:BP	neuron projection development	GO:0031175	0.0793893	0.0424403	0.00908612	2.04162	FRY,SHN,CWO,DSX,KR-H1,CHER,S6K,GCLC,PURA,ZFH1,RICTOR,BUR,MMP1,CG6701,DAW,NEUROCHONDRIN,JEB,MOE,TIG,IMPL2,SPZ,HSC70-4,TRC,CNC,ACSL,STRN-MLCK,NEDD4,FOXO,BDL,UZIP,AP,FER,IF,TUP,HAM,SS,PBL,DOM,CRB,CHB,TEN-M,ROBO3,NVY,KN,UNC-104,RUT,PKA-C1,DAC,HR51,HDAC1,ASH2,BTL
GO:BP	actomyosin structure organization	GO:0031032	0.0274809	0.00855652	0.0101612	1.99306	CG43658,MLC2,CHER,ZASP66,PRM,TN,CG5023,KON,SLS,ZASP52,UNC-89,NEDD4,HOW,FHOS,IF,PBL,CRB,DIA
GO:BP	energy derivation by oxidation of organic compounds	GO:0015980	0.0412214	0.0165141	0.010373	1.9841	FASN1,MACON1,KDN,GLYP,IDH,GPO1,ND-49,IRP-1B,ATPSYNF,COX5B,COX8,ND-B12,CG9034,SRL,CG9253,ATPSYNBETA,SDHA,ND-75,UQCR-C2,ARALAR1,CG5214,CG5028,SDHB,FUM1,AKHR,ND-PDSW,ND-B14.5A
GO:BP	cell morphogenesis involved in neuron differentiation	GO:0048667	0.0732824	0.0382476	0.010765	1.96799	FRY,SHN,CWO,DSX,CHER,S6K,GCLC,ZFH1,RICTOR,BUR,CG6701,DAW,JEB,MOE,TIG,IMPL2,SPZ,HSC70-4,TRC,CNC,ACSL,STRN-MLCK,NEDD4,FOXO,BDL,UZIP,BAZ,AP,FER,IF,TUP,HAM,SS,PBL,DOM,CRB,CHB,TEN-M,ROBO3,NVY,KN,UNC-104,RUT,DAC,HR51,HDAC1,ASH2,BTL
GO:BP	signal transduction	GO:0007165	0.212214	0.151023	0.0108134	1.96604	MEN,GLYP,SHN,SPIN,PDK1,DOR,CG43658,PLI,DIAP1,HR38,STY,CACT,RAW,PUC,SIK3,S6K,PURA,DL,CG5059,LUBEL,RICTOR,WDP,PVR,TNC,H,PRAS40,BUR,FNG,DAW,THOR,ITP,LOCO,CDC7,LKRSDH,CG3630,JRA,CG17278,EGR,WNT6,DUOX,EDL,LRT,TRE1,JEB,TIM,AOP,CG32276,IMPL2,SPZ,LGR1,MIP,ASTA,DGK,KRZ,TRC,KNRL,SRL,CG43324,IMD,CG4968,TRPL,SARM,LPIN,STRN-MLCK,PDE11,EAAT1,SREBP,CG2082,DNR1,NEDD4,FOXO,CG41520,CG44085,FER,SVP,IF,RGK3,RTGEF,NP…
GO:BP	cellular respiration	GO:0045333	0.0366412	0.013776	0.0108819	1.9633	MACON1,KDN,IDH,GPO1,ND-49,IRP-1B,ATPSYNF,COX5B,COX8,ND-B12,CG9034,SRL,CG9253,ATPSYNBETA,SDHA,ND-75,UQCR-C2,ARALAR1,CG5214,CG5028,SDHB,FUM1,ND-PDSW,ND-B14.5A
GO:BP	supramolecular fiber organization	GO:0097435	0.0549618	0.0254984	0.011303	1.94681	CLIP-190,SVR,CG43658,MLC2,CHER,ZASP66,PRM,DL,CORO,TN,CG1674,MP20,MYO31DF,CG5023,KON,MOE,SLS,SVIL,CAP,ZASP52,UNC-89,TACC,NEDD4,CG30069,HOW,FHOS,FER,IF,L(3)05822,CHB,ARPC2,TEN-M,BTSZ,PKA-R1,PXN,DIA
GO:BP	response to endogenous stimulus	GO:0009719	0.0549618	0.0254984	0.011303	1.94681	GLYP,SHN,SPIN,PDK1,DOR,HR38,CPR,STY,SIK3,S6K,RICTOR,TNC,PRAS40,DAW,THOR,LKRSDH,AOP,IMPL2,LGR1,SRL,LPIN,FOXO,CG12290,GLI,HTL,PBL,RAU,AKHR,DOP1R2,5-HT1A,CNK,FKH,LWR,LGR3,CG14220,BTL
GO:BP	monoatomic ion transmembrane transport	GO:0034220	0.0748092	0.0394455	0.0114807	1.94003	SERCA,NKCC,VHA100-2,BLOT,PAIN,SERT,CG13794,ZNT77C,NHA1,IRK1,MME1,CG33296,CG14401,SUBDUED,ZNT63C,ATPSYNF,FER1HCH,CLC-C,VHA36-1,TRPL,BLW,ATPSYNBETA,NEDD4,NCC69,NRV2,ARALAR1,NRV1,ATPSYNGAMMA,VHASFD,CLC-A,VHA68-2,RGK3,CG9338,ORT,CG12344,NOMPC,VHA36-3,NAAT1,NTR,NDAE1,DAT,PLC21C,CG11319,RGK1,ELK,RGK2,IRK2,VHA14-1,CNGA
GO:BP	phosphorus metabolic process	GO:0006793	0.132824	0.0843672	0.0118219	1.92731	ACCOAS,MEN,ENO,PYK,FRY,IDH,GPDH1,PDK1,SVR,GDH,STY,PUC,BON,SIK3,OYS,PECT,MUC,S6K,GPO1,CG2201,PVR,TN,PGD,CG6145,PRAS40,ADSS,BUR,CG8306,MENG,FBL,RY,SU(R),HMGS,R,GK2,CDC7,LKRSDH,PHU,CG4733,MOCS1,AGPAT2,CG9451,EDL,CG7365,PISD,PPCS,ATPSYNF,CG5065,WAT,HEX-A,DGK,TRC,PUML,BLW,SARM,ACSL,ATPSYNBETA,CG18135,STRN-MLCK,GAPDH1,PDE11,UNC-89,PFK,CG41520,FER,ATPSYNGAMMA,CG5214,PGK,VHA68-2,NAPRT,PKCDELTA,SQA,CG1274…
GO:BP	transmembrane receptor protein tyrosine kinase signaling pathway	GO:0007169	0.0458015	0.0195944	0.0127636	1.89403	GLYP,PDK1,STY,SIK3,S6K,RICTOR,PVR,PRAS40,THOR,EDL,JEB,AOP,IMPL2,KRZ,SRL,LPIN,FOXO,CG41520,FER,ADAMTS-B,HTL,PBL,RAU,TSL,SPG,RGL,CNK,FKH,GRK,BTL
GO:BP	neuron development	GO:0048666	0.0961832	0.0556174	0.0129969	1.88616	FRY,SHN,CWO,DSX,STY,KR-H1,CHER,S6K,GCLC,PURA,DL,ZFH1,RICTOR,WDP,BUR,MMP1,CG6701,DAW,POT,SLOW,NEUROCHONDRIN,EDL,JEB,MOE,TIG,MSK,IMPL2,SPZ,HSC70-4,TRC,CNC,ACSL,STRN-MLCK,NEDD4,FOXO,BDL,UZIP,BAZ,AP,FER,IF,TUP,GLI,HAM,SS,PBL,RAU,DOM,CRB,CHB,TEN-M,ROBO3,NVY,KN,UNC-104,RUT,PKA-C1,SDT,DAC,HR51,HDAC1,ASH2,BTL
GO:BP	response to organic substance	GO:0010033	0.0763359	0.0408146	0.0136581	1.86461	FASN1,PYK,GLYP,PDK1,DOR,HR38,CPR,CACT,KR-H1,PUC,SIK3,CHER,S6K,OBP56D,CLK,RICTOR,PRAS40,DAW,THOR,LKRSDH,EGR,DUOX,AGPAT2,CG32276,IMPL2,DRAT,LGR1,HSC70-4,SRL,LPIN,PFK,FOXO,TAB2,CG12290,EDEM1,HSP68,ORT,TRAF4,AKHR,RUT,PKA-C1,PKA-R1,DOP1R2,5-HT1A,TAK1,CNK,AC78C,FKH,LGR3,ASH2
GO:BP	neuron projection morphogenesis	GO:0048812	0.0732824	0.0386755	0.0144872	1.83901	FRY,SHN,CWO,DSX,CHER,S6K,GCLC,PURA,ZFH1,RICTOR,BUR,CG6701,DAW,JEB,MOE,TIG,IMPL2,SPZ,HSC70-4,TRC,CNC,ACSL,STRN-MLCK,NEDD4,FOXO,BDL,UZIP,AP,FER,IF,TUP,HAM,SS,PBL,DOM,CRB,CHB,TEN-M,ROBO3,NVY,KN,UNC-104,RUT,DAC,HR51,HDAC1,ASH2,BTL
GO:BP	plasma membrane bounded cell projection morphogenesis	GO:0120039	0.0732824	0.0388466	0.0162844	1.78823	FRY,SHN,CWO,DSX,CHER,S6K,GCLC,PURA,ZFH1,RICTOR,BUR,CG6701,DAW,JEB,MOE,TIG,IMPL2,SPZ,HSC70-4,TRC,CNC,ACSL,STRN-MLCK,NEDD4,FOXO,BDL,UZIP,AP,FER,IF,TUP,HAM,SS,PBL,DOM,CRB,CHB,TEN-M,ROBO3,NVY,KN,UNC-104,RUT,DAC,HR51,HDAC1,ASH2,BTL
GO:BP	cellular response to endogenous stimulus	GO:0071495	0.0534351	0.0248995	0.0164764	1.78314	GLYP,SHN,SPIN,PDK1,DOR,HR38,STY,SIK3,S6K,RICTOR,TNC,PRAS40,DAW,THOR,LKRSDH,AOP,IMPL2,LGR1,SRL,LPIN,FOXO,CG12290,GLI,HTL,PBL,RAU,AKHR,DOP1R2,5-HT1A,CNK,FKH,LWR,LGR3,CG14220,BTL
GO:BP	locomotory behavior	GO:0007626	0.0381679	0.0150595	0.0168722	1.77283	SERCA,PURA,GPO1,CLK,TN,PLE,FBL,ITP,PAIN,IRK1,TIM,KRZ,BETA4GALNACTA,EAAT1,FOXO,DCX-EMAP,NPF,CG6123,DCR-2,DAT,E,UNC-104,PLC21C,KTL,HR51
GO:BP	response to oxidative stress	GO:0006979	0.0335878	0.0123214	0.0170284	1.76883	IDH,PUC,S6K,PLE,FBL,THOR,LOCO,MRP4,MSRA,PLH,MOL,DUOX,SOD3,SPZ,JAFRAC1,SRL,CNC,FOXO,NAPRT,KEAP1,RUT,PXN
GO:BP	carboxylic acid biosynthetic process	GO:0046394	0.0320611	0.0114657	0.0177814	1.75003	FASN1,CG9674,BGM,TN,CG10621,SU(R),CG33110,R,B,LKRSDH,CG11899,CG12512,FATP3,HACD1,ACSL,SREBP,CG1673,BALDSPOT,CG31522,CG31523,CG5326
GO:BP	locomotion	GO:0040011	0.048855	0.0219902	0.0189018	1.7235	SPIN,DIAP1,MLC2,PUC,S6K,LBK,PVR,PLE,FBL,PAIN,EGR,LRT,TIM,AOP,PU,ATK,SLS,FHOS,SVP,PKCDELTA,GLI,HTL,ORT,PBL,NOMPC,TEN-M,ROBO3,UNC-104,KTL,HR51,CG14220,GRK
GO:BP	neurogenesis	GO:0022008	0.129771	0.0829982	0.0195754	1.70829	FRY,SHN,SPIN,CWO,DSX,STY,KR-H1,CHER,S6K,GCLC,PURA,DL,ZFH1,RICTOR,WDP,PVR,BUR,MMP1,CG6701,DAW,POT,LOCO,JRA,SIDPN,SLOW,EGR,WNT6,NEUROCHONDRIN,INSC,EDL,JEB,MOE,AOP,TIG,MSK,IMPL2,SPZ,HSC70-4,TRC,CNC,ACSL,STRN-MLCK,DNR1,NEDD4,FOXO,BDL,NRV2,HOW,UZIP,BAZ,AP,FER,SVP,IF,TUP,GLI,FW,HAM,HTL,LBL,SS,PBL,RAU,CG45105,DOM,CRB,CHB,TEN-M,SPG,ROBO3,NVY,KN,WMD,UNC-104,RUT,PKA-C1,SDT,DAC,CNK,FKH,HR51,HDAC1,ASH2,RBSN-…
GO:BP	organic acid biosynthetic process	GO:0016053	0.0320611	0.0115513	0.0199732	1.69955	FASN1,CG9674,BGM,TN,CG10621,SU(R),CG33110,R,B,LKRSDH,CG11899,CG12512,FATP3,HACD1,ACSL,SREBP,CG1673,BALDSPOT,CG31522,CG31523,CG5326
GO:BP	response to stress	GO:0006950	0.163359	0.111406	0.0246797	1.60766	GLYP,IDH,SPIN,VIR-1,PLI,STY,CACT,KR-H1,PUC,SIK3,S6K,CG14207,CG10345,MTPALPHA,LUBEL,BGM,CORO,RICTOR,PVR,PLE,ACT87E,FBL,MMP1,THOR,MFS14,BARK,ITP,LOCO,MRP4,PAIN,CDC7,GILT1,MSRA,JRA,PHU,PLH,SPN42DD,TEP3,SUG,CG4461,MOL,EGR,DUOX,ZNT77C,INSC,TIM,SUBDUED,CG32276,SOD3,IMPL2,SPZ,NIMC1,DRAT,ZNT63C,JAFRAC1,DROJ2,HSC70-4,KRZ,SRL,IMD,CG4968,TRPL,SARM,CNC,LPIN,SREBP,DNR1,FOXO,MRTF,FHOS,ARALAR1,FER,NAPRT,TM9SF2,…
GO:BP	cell surface receptor signaling pathway	GO:0007166	0.10687	0.0652007	0.0255393	1.59279	GLYP,SHN,SPIN,PDK1,PLI,DIAP1,STY,CACT,PUC,SIK3,S6K,DL,RICTOR,WDP,PVR,TNC,H,PRAS40,BUR,FNG,DAW,THOR,CG17278,EGR,WNT6,DUOX,EDL,LRT,JEB,AOP,IMPL2,SPZ,KRZ,SRL,LPIN,EAAT1,NEDD4,FOXO,CG41520,FER,IF,NPL4,UIF,TAB2,GLI,HAM,ADAMTS-B,HTL,PBL,TRAF4,RAU,CRB,TSL,NTR,SPG,DCR-2,EIF3F1,WMD,PKA-C1,PKA-R1,RGL,TAK1,CNK,FKH,LWR,HDAC1,HEC,CG14220,GRK,BTL
GO:BP	lipid metabolic process	GO:0006629	0.0885496	0.0509968	0.026009	1.58488	FASN1,SERCA,GPDH1,SIK3,OYS,PECT,LSD-1,CG2201,MTPALPHA,CG5191,BGM,CG8306,CG5009,RY,THOR,HMGS,CG33110,GK2,CG12512,FATP3,CG3842,AGPAT2,CG7365,PISD,CROT,MIP,ASTA,PDH,CG5065,WAT,DGK,QM,PUML,SPLY,HACD1,BETA4GALNACTA,ACSL,CG18135,LPIN,SREBP,FOXO,CG17646,MTPBETA,CG12746,CPT2,CG6847,CG7900,BALDSPOT,CG12268,AKHR,E,CG7997,PLC21C,RDGB,CG31522,CG31523,CG5326,CYP4AA1
GO:BP	aerobic respiration	GO:0009060	0.0335878	0.0126636	0.0264224	1.57803	MACON1,KDN,IDH,ND-49,IRP-1B,ATPSYNF,COX5B,COX8,ND-B12,CG9034,SRL,CG9253,ATPSYNBETA,SDHA,ND-75,UQCR-C2,CG5214,CG5028,SDHB,FUM1,ND-PDSW,ND-B14.5A
GO:BP	fatty acid metabolic process	GO:0006631	0.0335878	0.0126636	0.0264224	1.57803	FASN1,SERCA,MTPALPHA,CG5191,BGM,CG5009,CG33110,CG12512,FATP3,CROT,HACD1,ACSL,LPIN,SREBP,MTPBETA,CPT2,CG7900,BALDSPOT,E,CG31522,CG31523,CG5326
GO:BP	tissue morphogenesis	GO:0048729	0.0610687	0.0308035	0.0272962	1.5639	SHN,STY,RAW,PUC,CHER,DL,PVR,TNC,LAC,MMP1,LOCO,JRA,JEB,MOE,AOP,MSK,PPCS,BAZ,FHOS,FER,SVP,TUP,SQA,NSF2,STAC,FW,HTL,PBL,TRAF4,CRB,SCAF,SEC5,SDT,BTSZ,TAK1,FKH,LWR,RBSN-5,GRK,BTL
GO:BP	response to chemical	GO:0042221	0.132824	0.0863352	0.0284285	1.54625	FASN1,PYK,GLYP,IDH,PDK1,DOR,PINO,HR38,CPR,CACT,KR-H1,PUC,SIK3,CHER,GSTD1,S6K,GCLC,OBP56D,TRXR-1,CLK,RICTOR,IRP-1B,PLE,PRAS40,DAW,THOR,CG8745,ITP,PAIN,LKRSDH,MSRA,ANXB11,PHU,PLH,SUG,EGR,DUOX,AGPAT2,ZNT77C,LRT,CG32276,SOD3,IMPL2,SPZ,ELAL,DRAT,ZNT63C,JAFRAC1,LGR1,HSC70-4,FER1HCH,SRL,TRPL,LPIN,PFK,FOXO,MRTF,TAB2,CG12290,EDEM1,RH50,KEAP1,HSP68,ORT,CG12344,SS,TRAF4,NPF,TEN-M,ROBO3,DAT,AKHR,RUT,PKA-C1,S…
GO:BP	morphogenesis of an epithelium	GO:0002009	0.0580153	0.0288355	0.031329	1.50405	SHN,STY,RAW,PUC,CHER,DL,PVR,TNC,LAC,MMP1,LOCO,JRA,MOE,AOP,MSK,PPCS,BAZ,FHOS,FER,SVP,TUP,SQA,NSF2,STAC,FW,PBL,TRAF4,CRB,SCAF,SEC5,SDT,BTSZ,TAK1,FKH,LWR,RBSN-5,GRK,BTL
GO:BP	tube morphogenesis	GO:0035239	0.0366412	0.0147172	0.0334905	1.47508	SHN,STY,RAW,PUC,PVR,TNC,MMP1,LANB2,MOE,DRM,WAT,BAZ,SVP,VHA68-2,NSF2,STAC,PBL,CG45105,CRB,SEC5,BTSZ,CNK,FKH,BTL
GO:BP	nervous system development	GO:0007399	0.151145	0.102079	0.0356778	1.4476	FRY,SHN,SPIN,PDK1,CWO,DSX,ATF3,STY,CACT,KR-H1,RAW,CHER,S6K,GCLC,PURA,DL,SR,ZFH1,RICTOR,WDP,PVR,BUR,MMP1,CG6701,DAW,DLL,POT,LOCO,JRA,SUG,SIDPN,SLOW,EGR,WNT6,NEUROCHONDRIN,INSC,EDL,CG17221,JEB,MOE,AOP,TIG,MSK,IMPL2,SPZ,HSC70-4,TRC,IMD,CNC,ACSL,STRN-MLCK,DNR1,NEDD4,FOXO,BDL,NRV2,HOW,UZIP,BAZ,AP,FER,SVP,IF,TUP,NSF2,GLI,FW,HAM,HTL,LBL,SS,PBL,RAU,CG45105,DOM,DMTN,CRB,CHB,TEN-M,SPG,ROBO3,NVY,KN,SEC5,WMD…
GO:BP	amino acid transmembrane transport	GO:0003333	0.0183206	0.00462052	0.0360409	1.4432	SBM,NKCC,CG43693,CG1628,EAAT1,NCC69,ARALAR1,CG7888,CG4991,NAAT1,CG13743,CG12531
GO:BP	circadian behavior	GO:0048512	0.0290076	0.0102678	0.0384221	1.41542	SIK3,PURA,BGM,CLK,FBL,ITP,IRK1,CG14401,TIM,FOXO,CG9338,NPF,CG6123,DAT,E,PKA-C1,DOP1R2,5-HT1A,HR51
GO:BP	sleep	GO:0030431	0.0229008	0.00693078	0.0393651	1.40489	MEN,SIK3,BGM,CLK,CG14401,TIM,DNR1,CG9338,GABA-B-R3,DAT,RUT,PKA-C1,DOP1R2,5-HT1A,KTL
GO:BP	cellular response to stimulus	GO:0051716	0.256489	0.194404	0.0403848	1.39378	FASN1,MEN,GLYP,IDH,SHN,SPIN,PDK1,DOR,TTD14,CG43658,PLI,DIAP1,HR38,STY,CACT,RAW,PUC,SIK3,GSTD1,S6K,PURA,TRXR-1,DL,CG5059,LUBEL,BGM,RICTOR,WDP,PVR,TNC,H,PRAS40,BUR,ACT87E,FBL,FNG,DAW,THOR,BARK,ITP,LOCO,CDC7,LKRSDH,CG3630,MSRA,JRA,PLH,SUG,CG17278,EGR,WNT6,DUOX,EDL,LRT,TRE1,JEB,TIM,AOP,CG32276,SOD3,IMPL2,SPZ,DRAT,JAFRAC1,LGR1,MIP,ASTA,HSC70-4,DGK,KRZ,TRC,KNRL,SRL,CG43324,IMD,CG4968,TRPL,SARM,CNC,LPIN…
GO:BP	neuron differentiation	GO:0030182	0.112977	0.0710191	0.0405814	1.39167	FRY,SHN,CWO,DSX,STY,KR-H1,CHER,S6K,GCLC,PURA,DL,ZFH1,RICTOR,WDP,BUR,MMP1,CG6701,DAW,POT,JRA,SLOW,WNT6,NEUROCHONDRIN,EDL,JEB,MOE,AOP,TIG,MSK,IMPL2,SPZ,HSC70-4,TRC,CNC,ACSL,STRN-MLCK,DNR1,NEDD4,FOXO,BDL,UZIP,BAZ,AP,FER,SVP,IF,TUP,GLI,FW,HAM,LBL,SS,PBL,RAU,DOM,CRB,CHB,TEN-M,SPG,ROBO3,NVY,KN,UNC-104,RUT,PKA-C1,SDT,DAC,CNK,FKH,HR51,HDAC1,ASH2,RBSN-5,BTL
GO:BP	rhythmic behavior	GO:0007622	0.0290076	0.0103534	0.0432427	1.36409	SIK3,PURA,BGM,CLK,FBL,ITP,IRK1,CG14401,TIM,FOXO,CG9338,NPF,CG6123,DAT,E,PKA-C1,DOP1R2,5-HT1A,HR51
GO:BP	enzyme-linked receptor protein signaling pathway	GO:0007167	0.0549618	0.0271242	0.0435509	1.361	GLYP,SHN,SPIN,PDK1,STY,SIK3,S6K,RICTOR,PVR,TNC,PRAS40,DAW,THOR,EDL,JEB,AOP,IMPL2,KRZ,SRL,LPIN,FOXO,CG41520,FER,GLI,ADAMTS-B,HTL,PBL,RAU,TSL,SPG,RGL,CNK,FKH,CG14220,GRK,BTL
GO:BP	maintenance of location	GO:0051235	0.0274809	0.00949773	0.0442426	1.35416	FASN1,SERCA,ATF3,CACT,VPS13,LSD-1,IMPL2,FER1HCH,PUML,BLW,ACSL,SREBP,FOXO,SVP,IF,PBL,PLC21C,DIA
GO:BP	cellular response to oxygen-containing compound	GO:1901701	0.0412214	0.0178831	0.0443516	1.35309	FASN1,GLYP,PDK1,DOR,HR38,SIK3,S6K,RICTOR,PRAS40,DAW,THOR,LKRSDH,PLH,SOD3,IMPL2,DRAT,JAFRAC1,SRL,LPIN,FOXO,CG12290,PKA-C1,DOP1R2,5-HT1A,TAK1,CNK,FKH
GO:BP	tube development	GO:0035295	0.0458015	0.0209635	0.0472943	1.32519	SHN,STY,RAW,PUC,PVR,TNC,MMP1,MYO31DF,LANB2,INSC,MOE,DRM,WAT,QM,CNC,BAZ,SVP,IF,VHA68-2,TUP,NSF2,STAC,PBL,CG45105,CRB,SEC5,BTSZ,CNK,FKH,BTL
GO:BP	cell motility	GO:0048870	0.0641221	0.0337982	0.0488133	1.31146	SPIN,DIAP1,PUC,OYS,DL,SR,ZFH1,PVR,PLE,LANB2,EGR,LRT,TRE1,JEB,AOP,PU,PPCS,JAFRAC1,QM,KNRL,MRTF,HOW,BAZ,FHOS,IF,L(3)05822,GLI,SOSIE,HTL,LBL,DHC93AB,PBL,CG3339,CG45105,CHB,SEC5,CNK,LWR,KNI,CG14220,GRK,BTL
GO:CC	plasma membrane	GO:0005886	0.263473	0.145452	4.46063e-14	13.3506	ENO,PDK1,CG3036,SNU,CG33970,PLI,CG40006,STY,RAW,CHER,CG15096,CG10345,LBK,VINC,DL,TSP42EE,WDP,PVR,GUKH,VHA100-2,LAC,PICOT,H,BLOT,FBL,MMP1,CG43693,DAW,MFS14,BARK,PES,MYO31DF,ANCE-3,LOCO,PAIN,CG5080,SERT,GILT1,NEP2,TSP42EF,CG9717,CG31121,CG4797,MOL,EGR,CG13794,CG32091,DUOX,NEP7,ZNT77C,IRK1,CG5849,TSP42EI,LRT,ESP,CG33296,CG14694,CG14401,MCO1,TRE1,APOLTP,MOE,SUBDUED,SOD3,IMPL2,ENT2,TSP42EG,NIMC1,DSB,Z…
GO:CC	cell periphery	GO:0071944	0.29491	0.178539	6.38762e-12	11.1947	ENO,FRY,PDK1,CG3036,SNU,CG33970,PLI,CG40006,STY,SBM,RAW,CHER,CG15096,CG10345,LBK,VINC,ANXB9,DL,TSP42EE,WDP,PVR,TNC,GUKH,VHA100-2,LAC,PICOT,H,BLOT,FBL,CPR67B,MMP1,CG43693,DAW,MFS14,BARK,PES,MYO31DF,ANCE-3,LOCO,PAIN,CG5080,SERT,GILT1,LANB2,NEP2,TSP42EF,CG9717,CG31121,CG4797,MOL,EGR,CG13794,CG32091,DUOX,NEP7,ZNT77C,INSC,IRK1,CG5849,TSP42EI,LRT,ESP,CG33296,CG14694,CG14401,MCO1,TRE1,APOLTP,MOE,PPN,TIG…
GO:CC	cellular anatomical entity	GO:0110165	0.958084	0.880504	1.92271e-10	9.71609	SERCA,EBPIII,PCB,MEN,ENO,MACON1,PYK,FRY,KDN,GLYP,IDH,GPDH1,CLIP-190,SHN,SPIN,PDK1,CG7920,SVR,DOR,GDH,CG3036,DP1,UQCR-C1,TTD14,CG6910,CWO,SNU,CG10737,BEL,CG33970,CG9005,TREH,PLI,DIAP1,MLC2,HR38,CG40006,DSX,CG14186,SCAMC,CPR,ATF3,STY,CACT,CG32369,CG7720,SBM,VPS13,ALDH-III,KR-H1,RAW,PUC,BON,MESR3,CG32425,CG42672,SIK3,CHER,OYS,D2HGDH,ACTN,ZASP66,PRM,PECT,CG15096,LSD-1,MUC,GSTD1,S6K,GCLC,CYP4D21,CG102…
GO:CC	membrane	GO:0016020	0.48503	0.367278	2.91828e-08	7.53487	SERCA,ENO,KDN,SHN,SPIN,PDK1,SVR,CG3036,SNU,CG10737,CG33970,PLI,CG40006,CG14186,SCAMC,CPR,STY,CG7720,SBM,VPS13,ALDH-III,RAW,CG42672,CHER,OYS,CG15096,CYP4D21,GPO1,ND-49,CG10345,LBK,CG32694,VINC,DL,CG5059,TSP42EE,CG42390,NKCC,WDP,MCTP,PVR,GUKH,VHA100-2,LAC,PICOT,H,CG8306,BLOT,CG10550,FBL,MMP1,CG43693,CG17111,FNG,CG7530,DAW,CG12814,MFS14,CG9399,POT,CG33110,BARK,PES,MYO31DF,GK2,ANCE-3,ANXB10,LOCO,FMO-…
GO:CC	apical part of cell	GO:0045177	0.0479042	0.0162534	8.76852e-06	5.05707	FRY,SNU,CG33970,STY,CHER,VINC,DL,POT,LOCO,INSC,MOE,ZNT63C,WAT,ZASP52,BAZ,IF,PIO,CLC-A,UIF,SOSIE,TRAF4,CRB,DRIP,CG10939,ARPC2,SCAF,SDT,BTSZ,A,DIA,CNK,CHMP1
GO:CC	cell junction	GO:0030054	0.100299	0.0502529	9.89781e-06	5.00446	SERCA,SPIN,PDK1,CACT,ZASP66,S6K,VINC,MCTP,GUKH,LAC,THOR,BARK,MYO31DF,SERT,KON,SLOW,LRT,JEB,MOE,ENT2,HSC70-4,CLC-C,ACSL,CAP,EAAT1,ZASP52,DNR1,NEDD4,NRV2,BAZ,FER,SVP,IF,CG42673,PAX,PGK,RTGEF,CG12290,NSF2,GLI,STAC,FW,HTL,GRIP,ORT,CCDC85,CG12344,CRB,NTR,TEN-M,DAT,SEC5,UNC-104,RUT,RBP,SDT,RGK1,PKA-R1,DOP1R2,5-HT1A,SYNGR,A,METRO,BY,SNAP24,CG42319,SYX17
GO:CC	contractile fiber	GO:0043292	0.0269461	0.00621942	2.63238e-05	4.57965	MLC2,CHER,ZASP66,PRM,CG14207,TN,CG1674,CG3630,KON,SLS,GAPDH1,ZASP52,UNC-89,CG4928,PGK,ROBO3,DIA,CG42319
GO:CC	cytoplasm	GO:0005737	0.520958	0.425325	5.47928e-05	4.26128	SERCA,PCB,MEN,ENO,MACON1,PYK,FRY,KDN,GLYP,IDH,GPDH1,CLIP-190,SPIN,PDK1,CG7920,SVR,DOR,GDH,DP1,UQCR-C1,TTD14,CG6910,SNU,BEL,TREH,PLI,DIAP1,MLC2,HR38,CG40006,SCAMC,CPR,STY,CACT,CG32369,SBM,VPS13,ALDH-III,KR-H1,PUC,BON,SIK3,CHER,OYS,D2HGDH,ACTN,ZASP66,PRM,PECT,LSD-1,MUC,GSTD1,S6K,GCLC,CYP4D21,CG10237,CG3764,GPO1,CG14207,ND-49,CG2201,CG10345,MTPALPHA,TRXR-1,VINC,USP1,ANXB9,DL,CG5191,CG5059,TSP42EE,CG…
GO:CC	myofibril	GO:0030016	0.0254491	0.00588772	6.2081e-05	4.20704	MLC2,CHER,ZASP66,PRM,CG14207,TN,CG1674,CG3630,KON,SLS,GAPDH1,ZASP52,UNC-89,PGK,ROBO3,DIA,CG42319
GO:CC	sarcomere	GO:0030017	0.0239521	0.00555602	0.000146483	3.83421	CHER,ZASP66,PRM,CG14207,TN,CG1674,CG3630,KON,SLS,GAPDH1,ZASP52,UNC-89,PGK,ROBO3,DIA,CG42319
GO:CC	anchoring junction	GO:0070161	0.0419162	0.0149266	0.000177869	3.7499	ZASP66,VINC,LAC,BARK,MYO31DF,KON,SLOW,LRT,MOE,CAP,ZASP52,DNR1,NRV2,BAZ,FER,IF,PAX,GLI,FW,GRIP,CCDC85,CRB,SEC5,SDT,A,METRO,BY,CG42319
GO:CC	Z disc	GO:0030018	0.0179641	0.00373165	0.00112773	2.94779	CHER,ZASP66,CG14207,TN,CG1674,KON,SLS,GAPDH1,ZASP52,PGK,DIA,CG42319
GO:CC	I band	GO:0031674	0.0179641	0.00381458	0.00144976	2.8387	CHER,ZASP66,CG14207,TN,CG1674,KON,SLS,GAPDH1,ZASP52,PGK,DIA,CG42319
GO:CC	apical plasma membrane	GO:0016324	0.0299401	0.0097023	0.00165898	2.78016	SNU,CG33970,VINC,LOCO,MOE,ZNT63C,WAT,BAZ,IF,CLC-A,UIF,SOSIE,CRB,DRIP,CG10939,SCAF,SDT,BTSZ,A,DIA
GO:CC	adherens junction	GO:0005912	0.0194611	0.00497554	0.0053293	2.27333	ZASP66,VINC,BARK,MYO31DF,MOE,ZASP52,BAZ,FER,GRIP,CCDC85,SDT,A,CG42319
GO:CC	oxidoreductase complex	GO:1990204	0.0254491	0.00804378	0.00586484	2.23174	GPDH1,MUC,GPO1,ND-49,PPL,DUOX,CG44242,ND-B12,CG9034,SDHA,ND-75,UQCR-C2,CG5214,CG5028,SDHB,ND-PDSW,ND-B14.5A
GO:CC	proton-transporting two-sector ATPase complex, catalytic domain	GO:0033178	0.010479	0.00149266	0.00810174	2.09142	VHA36-1,BLW,ATPSYNBETA,ATPSYNGAMMA,VHASFD,VHA68-2,VHA14-1
GO:CC	cell-cell junction	GO:0005911	0.0299401	0.011112	0.0129782	1.88679	ZASP66,VINC,LAC,BARK,MYO31DF,MOE,ZASP52,NRV2,BAZ,FER,GLI,FW,GRIP,CCDC85,CRB,SEC5,SDT,A,METRO,CG42319
GO:CC	supramolecular fiber	GO:0099512	0.0479042	0.023385	0.0250688	1.60087	CLIP-190,DIAP1,MLC2,CHER,ZASP66,PRM,CG14207,TN,CG1674,BETATUB97EF,CG3630,KON,MOE,SLS,GAPDH1,ZASP52,UNC-89,CG2082,TACC,CG30069,CG4928,PGK,DCX-EMAP,DHC93AB,NOMPC,CG3339,CHB,ROBO3,UNC-104,CG17816,DIA,CG42319
GO:CC	M band	GO:0031430	0.00898204	0.00124388	0.0258096	1.58822	PRM,GAPDH1,UNC-89,PGK,ROBO3,DIA
GO:CC	cytosol	GO:0005829	0.136228	0.0927938	0.0285624	1.54421	MEN,ENO,MACON1,PYK,IDH,PDK1,CG7920,DOR,GDH,TTD14,BEL,PLI,DIAP1,CPR,STY,CACT,KR-H1,PUC,CHER,LSD-1,S6K,CG14207,TRXR-1,USP1,IRP-1B,PRAS40,BUR,FBL,CG6701,SU(R),THOR,R,LOCO,CG9436,FMO-2,LKRSDH,JRA,TIM,MOE,CG13784,EIF1A,PST,AOP,TUDOR-SN,MSK,PPCS,JAFRAC1,RPS15,DROJ2,BIC,RPL31,RPS19A,RPS17,RPS9,RPL29,HSC70-4,SAM-S,HEX-A,KRZ,SRL,IMD,CG13096,CG46385,LPIN,GAPDH1,PDE11,CG1640,PFK,FOXO,PAX,CG13124,PGK,NAPRT,N…
GO:CC	supramolecular polymer	GO:0099081	0.0479042	0.0236338	0.0306425	1.51368	CLIP-190,DIAP1,MLC2,CHER,ZASP66,PRM,CG14207,TN,CG1674,BETATUB97EF,CG3630,KON,MOE,SLS,GAPDH1,ZASP52,UNC-89,CG2082,TACC,CG30069,CG4928,PGK,DCX-EMAP,DHC93AB,NOMPC,CG3339,CHB,ROBO3,UNC-104,CG17816,DIA,CG42319
GO:CC	cytoplasmic side of plasma membrane	GO:0009898	0.0179641	0.00522431	0.0418277	1.37854	PLI,STY,VINC,MOE,CG43324,BAZ,FER,RGK3,CG10939,RGK1,RGK2,CNK
GO:CC	cell cortex	GO:0005938	0.0374251	0.0169168	0.0438596	1.35794	FRY,SBM,CHER,ANXB9,DL,MYO31DF,LOCO,INSC,TRE1,MOE,MSK,TRC,STRN-MLCK,BAZ,PAX,HIL,PBL,TRAF4,CHB,ARPC2,SEC5,RBP,SDT,DIA,CNK
GO:CC	actin cytoskeleton	GO:0015629	0.0284431	0.011195	0.0444657	1.35197	MLC2,CHER,ZASP66,PRM,VINC,CG1674,MP20,MYO31DF,CG3630,CG5023,MOE,SVIL,ZASP52,CLC-A,MLC-C,ARPC2,DCTN5-P25,DIA,CG42319
GO:CC	plasma membrane protein complex	GO:0098797	0.0329341	0.0140974	0.0489314	1.31041	SNU,CG33970,VHA100-2,CG31121,DUOX,MOE,VHA36-1,CG43324,TRPL,NRV2,NRV1,VHASFD,IF,VHA68-2,ORT,CRB,GABA-B-R3,SEC5,SDT,CG11319,ELK,VHA14-1
GO:CC	apical junction complex	GO:0043296	0.0164671	0.00456091	0.0498768	1.3021	LAC,BARK,MOE,ZASP52,NRV2,BAZ,GLI,FW,CRB,SEC5,SDT
KEGG	Carbon metabolism	KEGG:01200	0.105932	0.0341711	8.784e-06	5.05631	ACCOAS,PCB,MEN,ENO,MACON1,PYK,KDN,IDH,GDH,MUC,IRP-1B,PGD,CG5009,PPL,CG11899,HEX-A,GAPDH1,CG1640,SDHA,PFK,CG5214,CG5028,PGK,SDHB,FUM1
KEGG	Biosynthesis of amino acids	KEGG:01230	0.0677966	0.0192036	0.000269372	3.56965	CG9674,PCB,ENO,MACON1,PYK,KDN,IDH,IRP-1B,CG11899,SAM-S,GAPDH1,CG1640,PFK,CG5028,PGK,CG1673
KEGG	Metabolic pathways	KEGG:01100	0.457627	0.324485	0.00031853	3.49685	FASN1,CG9674,ACCOAS,PCB,MEN,ENO,MACON1,PYK,KDN,GLYP,IDH,GDH,CG6910,TREH,ALDH-III,PECT,MUC,GSTD1,GCLC,ND-49,CG2201,MTPALPHA,CG11050,BGM,CG10947,CG5618,IRP-1B,PGD,VHA100-2,CG6145,PLE,ADSS,BUR,CG5009,FBL,RY,CG10621,SU(R),HMGS,R,GK2,CG8745,CG9436,B,LKRSDH,CG5177,PPL,CG11899,PHU,CG11241,MOCS1,CG5955,PISD,PU,CG8665,CG3597,SARDH,PPCS,ATPSYNF,COX5B,COX8,ND-B12,SAM-S,HEX-A,DGK,QM,VHA36-1,SPLY,HACD1,BLW,AC…
KEGG	2-Oxocarboxylic acid metabolism	KEGG:01210	0.0466102	0.0101666	0.000567464	3.24606	MACON1,KDN,IDH,MUC,IRP-1B,CG11241,CG1640,CG5214,CG5028,CG1673,CG5599
KEGG	Citrate cycle (TCA cycle)	KEGG:00020	0.0466102	0.0121435	0.00357465	2.44677	PCB,MACON1,KDN,IDH,MUC,IRP-1B,SDHA,CG5214,CG5028,SDHB,FUM1
KEGG	Pantothenate and CoA biosynthesis	KEGG:00770	0.0254237	0.00395369	0.00719766	2.14281	CG5618,FBL,SU(R),B,PPCS,CG1673
KEGG	Longevity regulating pathway - multiple species	KEGG:04213	0.0466102	0.0155323	0.0363677	1.43928	S6K,THOR,SOD3,HSC70-4,FOXO,HSP68,RUT,PKA-C1,AC78C,FKH,HDAC1
WP	Fatty acid beta oxidation 1	WP:WP39	0.241379	0.0473684	0.000595203	3.22533	ACCOAS,GPO1,MTPALPHA,GK2,ACSL,MTPBETA,CPT2
WP	Fatty acid biosynthesis	WP:WP568	0.137931	0.0315789	0.0411199	1.38595	FASN1,ACCOAS,PCB,ACSL
TF	Factor: slou; motif: TTAATTR; match class: 1	TF:M02363_1	0.401617	0.315142	6.5597e-05	4.18312	FASN1,CG9674,PCB,MEN,KDN,IDH,SHN,SPIN,PDK1,DOR,DP1,TTD14,SNU,CG10737,CG43658,CG33970,CG9005,TREH,CG40006,CACT,CG7720,CG5151,KR-H1,RAW,BON,MESR3,CG32425,CG42672,ZASP66,MUC,GCLC,PURA,CG5973,CYP4D21,CG14207,ND-49,OBP56D,CG13315,TRXR-1,VINC,ANXB9,CG42390,LUBEL,BGM,ZFH1,MCTP,SCP1,TNC,CG5618,VHA100-2,CG5945,MP20,H,PRAS40,ADSS,BLOT,CG5009,CG10550,ACT87E,FBL,CPR67B,CG43693,RY,CG7530,DAW,CG9837,MFS14,HMGS…
TF	Factor: CG15696; motif: TTAATTR; match class: 1	TF:M02294_1	0.401617	0.315142	6.5597e-05	4.18312	FASN1,CG9674,PCB,MEN,KDN,IDH,SHN,SPIN,PDK1,DOR,DP1,TTD14,SNU,CG10737,CG43658,CG33970,CG9005,TREH,CG40006,CACT,CG7720,CG5151,KR-H1,RAW,BON,MESR3,CG32425,CG42672,ZASP66,MUC,GCLC,PURA,CG5973,CYP4D21,CG14207,ND-49,OBP56D,CG13315,TRXR-1,VINC,ANXB9,CG42390,LUBEL,BGM,ZFH1,MCTP,SCP1,TNC,CG5618,VHA100-2,CG5945,MP20,H,PRAS40,ADSS,BLOT,CG5009,CG10550,ACT87E,FBL,CPR67B,CG43693,RY,CG7530,DAW,CG9837,MFS14,HMGS…
TF	Factor: Ubx; motif: NTTAATTA	TF:M02376	0.501348	0.414777	0.0002095	3.67882	FASN1,CG9674,PCB,MEN,ENO,KDN,IDH,GPDH1,CLIP-190,SHN,SPIN,PDK1,VIR-1,DOR,GDH,DP1,TTD14,SNU,CG10737,CG43658,CG9005,TREH,DIAP1,CG40006,CPR,CACT,CG7720,CG5151,ALDH-III,KR-H1,RAW,PUC,BON,MESR3,CG32425,CG42672,CHER,D2HGDH,ZASP66,LSD-1,GCLC,PURA,CG5973,CYP4D21,CG10237,CG14207,ND-49,CG2201,OBP56D,CG13315,LBK,TRXR-1,VINC,ANXB9,CG5059,LUBEL,BGM,ZFH1,CLK,CORO,WDP,MCTP,SCP1,TNC,CG5618,TN,GUKH,VHA100-2,CG6145…
TF	Factor: CG32532; motif: TTAATTR	TF:M02297	0.501348	0.41492	0.000218332	3.66088	FASN1,CG9674,PCB,MEN,ENO,KDN,IDH,GPDH1,CLIP-190,SHN,SPIN,PDK1,VIR-1,DOR,GDH,DP1,TTD14,SNU,CG10737,CG43658,CG9005,TREH,DIAP1,CG40006,CPR,CACT,CG7720,CG5151,ALDH-III,KR-H1,RAW,PUC,BON,MESR3,CG32425,CG42672,CHER,D2HGDH,ZASP66,LSD-1,GCLC,PURA,CG5973,CYP4D21,CG10237,CG14207,ND-49,CG2201,OBP56D,CG13315,LBK,TRXR-1,VINC,ANXB9,CG5059,LUBEL,BGM,ZFH1,CLK,CORO,WDP,MCTP,SCP1,TNC,CG5618,TN,GUKH,VHA100-2,CG6145…
TF	Factor: E5; motif: NTAATKA	TF:M02307	0.501348	0.41492	0.000218332	3.66088	FASN1,CG9674,PCB,MEN,ENO,KDN,IDH,GPDH1,CLIP-190,SHN,SPIN,PDK1,VIR-1,DOR,GDH,DP1,TTD14,SNU,CG10737,CG43658,CG9005,TREH,DIAP1,CG40006,CPR,CACT,CG7720,CG5151,ALDH-III,KR-H1,RAW,PUC,BON,MESR3,CG32425,CG42672,CHER,D2HGDH,ZASP66,LSD-1,GCLC,PURA,CG5973,CYP4D21,CG10237,CG14207,ND-49,CG2201,OBP56D,CG13315,LBK,TRXR-1,VINC,ANXB9,CG5059,LUBEL,BGM,ZFH1,CLK,CORO,WDP,MCTP,SCP1,TNC,CG5618,TN,GUKH,VHA100-2,CG6145…
TF	Factor: en; motif: YTAATTR	TF:M02338	0.501348	0.41492	0.000218332	3.66088	FASN1,CG9674,PCB,MEN,ENO,KDN,IDH,GPDH1,CLIP-190,SHN,SPIN,PDK1,VIR-1,DOR,GDH,DP1,TTD14,SNU,CG10737,CG43658,CG9005,TREH,DIAP1,CG40006,CPR,CACT,CG7720,CG5151,ALDH-III,KR-H1,RAW,PUC,BON,MESR3,CG32425,CG42672,CHER,D2HGDH,ZASP66,LSD-1,GCLC,PURA,CG5973,CYP4D21,CG10237,CG14207,ND-49,CG2201,OBP56D,CG13315,LBK,TRXR-1,VINC,ANXB9,CG5059,LUBEL,BGM,ZFH1,CLK,CORO,WDP,MCTP,SCP1,TNC,CG5618,TN,GUKH,VHA100-2,CG6145…
TF	Factor: H2.0; motif: TTWATDA	TF:M03144	0.501348	0.41492	0.000218332	3.66088	FASN1,CG9674,PCB,MEN,ENO,KDN,IDH,GPDH1,CLIP-190,SHN,SPIN,PDK1,VIR-1,DOR,GDH,DP1,TTD14,SNU,CG10737,CG43658,CG9005,TREH,DIAP1,CG40006,CPR,CACT,CG7720,CG5151,ALDH-III,KR-H1,RAW,PUC,BON,MESR3,CG32425,CG42672,CHER,D2HGDH,ZASP66,LSD-1,GCLC,PURA,CG5973,CYP4D21,CG10237,CG14207,ND-49,CG2201,OBP56D,CG13315,LBK,TRXR-1,VINC,ANXB9,CG5059,LUBEL,BGM,ZFH1,CLK,CORO,WDP,MCTP,SCP1,TNC,CG5618,TN,GUKH,VHA100-2,CG6145…
TF	Factor: CG11294; motif: TTAATTA	TF:M02290	0.501348	0.41492	0.000218332	3.66088	FASN1,CG9674,PCB,MEN,ENO,KDN,IDH,GPDH1,CLIP-190,SHN,SPIN,PDK1,VIR-1,DOR,GDH,DP1,TTD14,SNU,CG10737,CG43658,CG9005,TREH,DIAP1,CG40006,CPR,CACT,CG7720,CG5151,ALDH-III,KR-H1,RAW,PUC,BON,MESR3,CG32425,CG42672,CHER,D2HGDH,ZASP66,LSD-1,GCLC,PURA,CG5973,CYP4D21,CG10237,CG14207,ND-49,CG2201,OBP56D,CG13315,LBK,TRXR-1,VINC,ANXB9,CG5059,LUBEL,BGM,ZFH1,CLK,CORO,WDP,MCTP,SCP1,TNC,CG5618,TN,GUKH,VHA100-2,CG6145…
TF	Factor: C15; motif: TTAAWKR	TF:M02288	0.501348	0.41492	0.000218332	3.66088	FASN1,CG9674,PCB,MEN,ENO,KDN,IDH,GPDH1,CLIP-190,SHN,SPIN,PDK1,VIR-1,DOR,GDH,DP1,TTD14,SNU,CG10737,CG43658,CG9005,TREH,DIAP1,CG40006,CPR,CACT,CG7720,CG5151,ALDH-III,KR-H1,RAW,PUC,BON,MESR3,CG32425,CG42672,CHER,D2HGDH,ZASP66,LSD-1,GCLC,PURA,CG5973,CYP4D21,CG10237,CG14207,ND-49,CG2201,OBP56D,CG13315,LBK,TRXR-1,VINC,ANXB9,CG5059,LUBEL,BGM,ZFH1,CLK,CORO,WDP,MCTP,SCP1,TNC,CG5618,TN,GUKH,VHA100-2,CG6145…
TF	Factor: Awh; motif: YTAATTA	TF:M02285	0.501348	0.41492	0.000218332	3.66088	FASN1,CG9674,PCB,MEN,ENO,KDN,IDH,GPDH1,CLIP-190,SHN,SPIN,PDK1,VIR-1,DOR,GDH,DP1,TTD14,SNU,CG10737,CG43658,CG9005,TREH,DIAP1,CG40006,CPR,CACT,CG7720,CG5151,ALDH-III,KR-H1,RAW,PUC,BON,MESR3,CG32425,CG42672,CHER,D2HGDH,ZASP66,LSD-1,GCLC,PURA,CG5973,CYP4D21,CG10237,CG14207,ND-49,CG2201,OBP56D,CG13315,LBK,TRXR-1,VINC,ANXB9,CG5059,LUBEL,BGM,ZFH1,CLK,CORO,WDP,MCTP,SCP1,TNC,CG5618,TN,GUKH,VHA100-2,CG6145…
TF	Factor: Vsx1; motif: YTAATTA	TF:M02299	0.501348	0.41492	0.000218332	3.66088	FASN1,CG9674,PCB,MEN,ENO,KDN,IDH,GPDH1,CLIP-190,SHN,SPIN,PDK1,VIR-1,DOR,GDH,DP1,TTD14,SNU,CG10737,CG43658,CG9005,TREH,DIAP1,CG40006,CPR,CACT,CG7720,CG5151,ALDH-III,KR-H1,RAW,PUC,BON,MESR3,CG32425,CG42672,CHER,D2HGDH,ZASP66,LSD-1,GCLC,PURA,CG5973,CYP4D21,CG10237,CG14207,ND-49,CG2201,OBP56D,CG13315,LBK,TRXR-1,VINC,ANXB9,CG5059,LUBEL,BGM,ZFH1,CLK,CORO,WDP,MCTP,SCP1,TNC,CG5618,TN,GUKH,VHA100-2,CG6145…
TF	Factor: hbn; motif: TTAATTR	TF:M02344	0.501348	0.41492	0.000218332	3.66088	FASN1,CG9674,PCB,MEN,ENO,KDN,IDH,GPDH1,CLIP-190,SHN,SPIN,PDK1,VIR-1,DOR,GDH,DP1,TTD14,SNU,CG10737,CG43658,CG9005,TREH,DIAP1,CG40006,CPR,CACT,CG7720,CG5151,ALDH-III,KR-H1,RAW,PUC,BON,MESR3,CG32425,CG42672,CHER,D2HGDH,ZASP66,LSD-1,GCLC,PURA,CG5973,CYP4D21,CG10237,CG14207,ND-49,CG2201,OBP56D,CG13315,LBK,TRXR-1,VINC,ANXB9,CG5059,LUBEL,BGM,ZFH1,CLK,CORO,WDP,MCTP,SCP1,TNC,CG5618,TN,GUKH,VHA100-2,CG6145…
TF	Factor: HGTX; motif: TTAATTA	TF:M02309	0.501348	0.41492	0.000218332	3.66088	FASN1,CG9674,PCB,MEN,ENO,KDN,IDH,GPDH1,CLIP-190,SHN,SPIN,PDK1,VIR-1,DOR,GDH,DP1,TTD14,SNU,CG10737,CG43658,CG9005,TREH,DIAP1,CG40006,CPR,CACT,CG7720,CG5151,ALDH-III,KR-H1,RAW,PUC,BON,MESR3,CG32425,CG42672,CHER,D2HGDH,ZASP66,LSD-1,GCLC,PURA,CG5973,CYP4D21,CG10237,CG14207,ND-49,CG2201,OBP56D,CG13315,LBK,TRXR-1,VINC,ANXB9,CG5059,LUBEL,BGM,ZFH1,CLK,CORO,WDP,MCTP,SCP1,TNC,CG5618,TN,GUKH,VHA100-2,CG6145…
TF	Factor: lab; motif: TTAATKA	TF:M02348	0.501348	0.41492	0.000218332	3.66088	FASN1,CG9674,PCB,MEN,ENO,KDN,IDH,GPDH1,CLIP-190,SHN,SPIN,PDK1,VIR-1,DOR,GDH,DP1,TTD14,SNU,CG10737,CG43658,CG9005,TREH,DIAP1,CG40006,CPR,CACT,CG7720,CG5151,ALDH-III,KR-H1,RAW,PUC,BON,MESR3,CG32425,CG42672,CHER,D2HGDH,ZASP66,LSD-1,GCLC,PURA,CG5973,CYP4D21,CG10237,CG14207,ND-49,CG2201,OBP56D,CG13315,LBK,TRXR-1,VINC,ANXB9,CG5059,LUBEL,BGM,ZFH1,CLK,CORO,WDP,MCTP,SCP1,TNC,CG5618,TN,GUKH,VHA100-2,CG6145…
TF	Factor: Lim1; motif: TTAATTA	TF:M02312	0.501348	0.41492	0.000218332	3.66088	FASN1,CG9674,PCB,MEN,ENO,KDN,IDH,GPDH1,CLIP-190,SHN,SPIN,PDK1,VIR-1,DOR,GDH,DP1,TTD14,SNU,CG10737,CG43658,CG9005,TREH,DIAP1,CG40006,CPR,CACT,CG7720,CG5151,ALDH-III,KR-H1,RAW,PUC,BON,MESR3,CG32425,CG42672,CHER,D2HGDH,ZASP66,LSD-1,GCLC,PURA,CG5973,CYP4D21,CG10237,CG14207,ND-49,CG2201,OBP56D,CG13315,LBK,TRXR-1,VINC,ANXB9,CG5059,LUBEL,BGM,ZFH1,CLK,CORO,WDP,MCTP,SCP1,TNC,CG5618,TN,GUKH,VHA100-2,CG6145…
TF	Factor: al; motif: TAATTAA	TF:M02326	0.501348	0.41492	0.000218332	3.66088	FASN1,CG9674,PCB,MEN,ENO,KDN,IDH,GPDH1,CLIP-190,SHN,SPIN,PDK1,VIR-1,DOR,GDH,DP1,TTD14,SNU,CG10737,CG43658,CG9005,TREH,DIAP1,CG40006,CPR,CACT,CG7720,CG5151,ALDH-III,KR-H1,RAW,PUC,BON,MESR3,CG32425,CG42672,CHER,D2HGDH,ZASP66,LSD-1,GCLC,PURA,CG5973,CYP4D21,CG10237,CG14207,ND-49,CG2201,OBP56D,CG13315,LBK,TRXR-1,VINC,ANXB9,CG5059,LUBEL,BGM,ZFH1,CLK,CORO,WDP,MCTP,SCP1,TNC,CG5618,TN,GUKH,VHA100-2,CG6145…
TF	Factor: zen2; motif: NTAATKA	TF:M02375	0.501348	0.41492	0.000218332	3.66088	FASN1,CG9674,PCB,MEN,ENO,KDN,IDH,GPDH1,CLIP-190,SHN,SPIN,PDK1,VIR-1,DOR,GDH,DP1,TTD14,SNU,CG10737,CG43658,CG9005,TREH,DIAP1,CG40006,CPR,CACT,CG7720,CG5151,ALDH-III,KR-H1,RAW,PUC,BON,MESR3,CG32425,CG42672,CHER,D2HGDH,ZASP66,LSD-1,GCLC,PURA,CG5973,CYP4D21,CG10237,CG14207,ND-49,CG2201,OBP56D,CG13315,LBK,TRXR-1,VINC,ANXB9,CG5059,LUBEL,BGM,ZFH1,CLK,CORO,WDP,MCTP,SCP1,TNC,CG5618,TN,GUKH,VHA100-2,CG6145…
TF	Factor: abd-A; motif: TTAATTA	TF:M02324	0.501348	0.41492	0.000218332	3.66088	FASN1,CG9674,PCB,MEN,ENO,KDN,IDH,GPDH1,CLIP-190,SHN,SPIN,PDK1,VIR-1,DOR,GDH,DP1,TTD14,SNU,CG10737,CG43658,CG9005,TREH,DIAP1,CG40006,CPR,CACT,CG7720,CG5151,ALDH-III,KR-H1,RAW,PUC,BON,MESR3,CG32425,CG42672,CHER,D2HGDH,ZASP66,LSD-1,GCLC,PURA,CG5973,CYP4D21,CG10237,CG14207,ND-49,CG2201,OBP56D,CG13315,LBK,TRXR-1,VINC,ANXB9,CG5059,LUBEL,BGM,ZFH1,CLK,CORO,WDP,MCTP,SCP1,TNC,CG5618,TN,GUKH,VHA100-2,CG6145…
TF	Factor: Lim3; motif: NTAATTA	TF:M02313	0.501348	0.41492	0.000218332	3.66088	FASN1,CG9674,PCB,MEN,ENO,KDN,IDH,GPDH1,CLIP-190,SHN,SPIN,PDK1,VIR-1,DOR,GDH,DP1,TTD14,SNU,CG10737,CG43658,CG9005,TREH,DIAP1,CG40006,CPR,CACT,CG7720,CG5151,ALDH-III,KR-H1,RAW,PUC,BON,MESR3,CG32425,CG42672,CHER,D2HGDH,ZASP66,LSD-1,GCLC,PURA,CG5973,CYP4D21,CG10237,CG14207,ND-49,CG2201,OBP56D,CG13315,LBK,TRXR-1,VINC,ANXB9,CG5059,LUBEL,BGM,ZFH1,CLK,CORO,WDP,MCTP,SCP1,TNC,CG5618,TN,GUKH,VHA100-2,CG6145…
TF	Factor: otp; motif: YTAATTA	TF:M02354	0.501348	0.41492	0.000218332	3.66088	FASN1,CG9674,PCB,MEN,ENO,KDN,IDH,GPDH1,CLIP-190,SHN,SPIN,PDK1,VIR-1,DOR,GDH,DP1,TTD14,SNU,CG10737,CG43658,CG9005,TREH,DIAP1,CG40006,CPR,CACT,CG7720,CG5151,ALDH-III,KR-H1,RAW,PUC,BON,MESR3,CG32425,CG42672,CHER,D2HGDH,ZASP66,LSD-1,GCLC,PURA,CG5973,CYP4D21,CG10237,CG14207,ND-49,CG2201,OBP56D,CG13315,LBK,TRXR-1,VINC,ANXB9,CG5059,LUBEL,BGM,ZFH1,CLK,CORO,WDP,MCTP,SCP1,TNC,CG5618,TN,GUKH,VHA100-2,CG6145…
TF	Factor: pb; motif: YTAATKA	TF:M02356	0.501348	0.41492	0.000218332	3.66088	FASN1,CG9674,PCB,MEN,ENO,KDN,IDH,GPDH1,CLIP-190,SHN,SPIN,PDK1,VIR-1,DOR,GDH,DP1,TTD14,SNU,CG10737,CG43658,CG9005,TREH,DIAP1,CG40006,CPR,CACT,CG7720,CG5151,ALDH-III,KR-H1,RAW,PUC,BON,MESR3,CG32425,CG42672,CHER,D2HGDH,ZASP66,LSD-1,GCLC,PURA,CG5973,CYP4D21,CG10237,CG14207,ND-49,CG2201,OBP56D,CG13315,LBK,TRXR-1,VINC,ANXB9,CG5059,LUBEL,BGM,ZFH1,CLK,CORO,WDP,MCTP,SCP1,TNC,CG5618,TN,GUKH,VHA100-2,CG6145…
TF	Factor: PHDP; motif: YTAATTN	TF:M03153	0.501348	0.41492	0.000218332	3.66088	FASN1,CG9674,PCB,MEN,ENO,KDN,IDH,GPDH1,CLIP-190,SHN,SPIN,PDK1,VIR-1,DOR,GDH,DP1,TTD14,SNU,CG10737,CG43658,CG9005,TREH,DIAP1,CG40006,CPR,CACT,CG7720,CG5151,ALDH-III,KR-H1,RAW,PUC,BON,MESR3,CG32425,CG42672,CHER,D2HGDH,ZASP66,LSD-1,GCLC,PURA,CG5973,CYP4D21,CG10237,CG14207,ND-49,CG2201,OBP56D,CG13315,LBK,TRXR-1,VINC,ANXB9,CG5059,LUBEL,BGM,ZFH1,CLK,CORO,WDP,MCTP,SCP1,TNC,CG5618,TN,GUKH,VHA100-2,CG6145…
TF	Factor: repo; motif: TTAATTA	TF:M02358	0.501348	0.41492	0.000218332	3.66088	FASN1,CG9674,PCB,MEN,ENO,KDN,IDH,GPDH1,CLIP-190,SHN,SPIN,PDK1,VIR-1,DOR,GDH,DP1,TTD14,SNU,CG10737,CG43658,CG9005,TREH,DIAP1,CG40006,CPR,CACT,CG7720,CG5151,ALDH-III,KR-H1,RAW,PUC,BON,MESR3,CG32425,CG42672,CHER,D2HGDH,ZASP66,LSD-1,GCLC,PURA,CG5973,CYP4D21,CG10237,CG14207,ND-49,CG2201,OBP56D,CG13315,LBK,TRXR-1,VINC,ANXB9,CG5059,LUBEL,BGM,ZFH1,CLK,CORO,WDP,MCTP,SCP1,TNC,CG5618,TN,GUKH,VHA100-2,CG6145…
TF	Factor: CG32105; motif: TTAATTA	TF:M02296	0.501348	0.41492	0.000218332	3.66088	FASN1,CG9674,PCB,MEN,ENO,KDN,IDH,GPDH1,CLIP-190,SHN,SPIN,PDK1,VIR-1,DOR,GDH,DP1,TTD14,SNU,CG10737,CG43658,CG9005,TREH,DIAP1,CG40006,CPR,CACT,CG7720,CG5151,ALDH-III,KR-H1,RAW,PUC,BON,MESR3,CG32425,CG42672,CHER,D2HGDH,ZASP66,LSD-1,GCLC,PURA,CG5973,CYP4D21,CG10237,CG14207,ND-49,CG2201,OBP56D,CG13315,LBK,TRXR-1,VINC,ANXB9,CG5059,LUBEL,BGM,ZFH1,CLK,CORO,WDP,MCTP,SCP1,TNC,CG5618,TN,GUKH,VHA100-2,CG6145…
TF	Factor: unpg; motif: YTAATTA	TF:M02369	0.501348	0.41492	0.000218332	3.66088	FASN1,CG9674,PCB,MEN,ENO,KDN,IDH,GPDH1,CLIP-190,SHN,SPIN,PDK1,VIR-1,DOR,GDH,DP1,TTD14,SNU,CG10737,CG43658,CG9005,TREH,DIAP1,CG40006,CPR,CACT,CG7720,CG5151,ALDH-III,KR-H1,RAW,PUC,BON,MESR3,CG32425,CG42672,CHER,D2HGDH,ZASP66,LSD-1,GCLC,PURA,CG5973,CYP4D21,CG10237,CG14207,ND-49,CG2201,OBP56D,CG13315,LBK,TRXR-1,VINC,ANXB9,CG5059,LUBEL,BGM,ZFH1,CLK,CORO,WDP,MCTP,SCP1,TNC,CG5618,TN,GUKH,VHA100-2,CG6145…
TF	Factor: Atf3; motif: NRTGACGTCAYN	TF:M07666	0.0579515	0.0264645	0.000359221	3.44464	FRY,SVR,CG10737,TREH,HR38,CG14186,RAW,D2HGDH,CG13315,MFS14,PES,GK2,CG9436,CG14687,CG5023,CG13794,UDE,TIM,DSB,SAM-S,SEC63,VPS60,CG46385,ACSL,FOXO,HOW,CG17549,CG5214,IF,UIF,CG33978,L(3)05822,MLC-C,LBL,ORT,TG,LOXL2,RPL17,EIF3F1,UNC-104,SNPF,PKA-R1,CYSRS
TF	Factor: Atf3; motif: NRTGACGTCAYN; match class: 1	TF:M07666_1	0.0539084	0.0238896	0.000399311	3.39869	FRY,SVR,CG10737,TREH,HR38,CG14186,RAW,MFS14,PES,GK2,CG9436,CG14687,CG5023,CG13794,UDE,TIM,DSB,SAM-S,SEC63,VPS60,CG46385,ACSL,HOW,CG17549,CG5214,IF,UIF,CG33978,L(3)05822,MLC-C,LBL,ORT,TG,LOXL2,RPL17,EIF3F1,UNC-104,SNPF,PKA-R1,CYSRS
TF	Factor: CG18599; motif: YTAATTA	TF:M02295	0.561995	0.477148	0.000402448	3.39529	FASN1,CG9674,PCB,MEN,ENO,KDN,IDH,GPDH1,CLIP-190,SHN,SPIN,PDK1,VIR-1,DOR,GDH,DP1,TTD14,SNU,CG10737,CG43658,CG9005,TREH,DIAP1,CG40006,CG14186,CPR,CACT,CG32369,CG7720,CG5151,ALDH-III,KR-H1,RAW,PUC,BON,MESR3,CG1648,CG32425,CG42672,CHER,D2HGDH,ACTN,ZASP66,PRM,LSD-1,MUC,GCLC,PURA,CG5973,CYP4D21,CG10237,GPO1,CG14207,ND-49,CG2201,OBP56D,CG13315,LBK,TRXR-1,VINC,USP1,ANXB9,CG11050,CG5059,LUBEL,BGM,ZFH1,CLK…
TF	Factor: slou; motif: TTAATTR	TF:M02363	0.67655	0.59681	0.000835635	3.07798	FASN1,CG9674,PCB,MEN,ENO,PYK,KDN,IDH,GPDH1,CLIP-190,SHN,SPIN,PDK1,CG7920,VIR-1,SVR,DOR,GDH,DP1,TTD14,SNU,CG10737,CG43658,CG33970,CG9005,TREH,DIAP1,CG40006,SCAMC,CPR,STY,CACT,CG7720,CG5151,VPS13,ALDH-III,KR-H1,RAW,PUC,BON,MESR3,CG32425,CG42672,CHER,OYS,D2HGDH,ZASP66,PRM,PECT,CG15096,LSD-1,MUC,GCLC,PURA,CG5973,CYP4D21,CG10237,CG2865,CG14207,ND-49,CG2201,OBP56D,CG10345,CG31324,CG13315,LBK,TRXR-1,VIN…
TF	Factor: CG15696; motif: TTAATTR	TF:M02294	0.67655	0.59681	0.000835635	3.07798	FASN1,CG9674,PCB,MEN,ENO,PYK,KDN,IDH,GPDH1,CLIP-190,SHN,SPIN,PDK1,CG7920,VIR-1,SVR,DOR,GDH,DP1,TTD14,SNU,CG10737,CG43658,CG33970,CG9005,TREH,DIAP1,CG40006,SCAMC,CPR,STY,CACT,CG7720,CG5151,VPS13,ALDH-III,KR-H1,RAW,PUC,BON,MESR3,CG32425,CG42672,CHER,OYS,D2HGDH,ZASP66,PRM,PECT,CG15096,LSD-1,MUC,GCLC,PURA,CG5973,CYP4D21,CG10237,CG2865,CG14207,ND-49,CG2201,OBP56D,CG10345,CG31324,CG13315,LBK,TRXR-1,VIN…
TF	Factor: Ubx; motif: GYAATTAN	TF:M07834	0.567385	0.485874	0.000988462	3.00504	FASN1,CG9674,PCB,MEN,ENO,KDN,IDH,GPDH1,CLIP-190,SHN,SPIN,PDK1,VIR-1,DOR,GDH,DP1,TTD14,SNU,CG10737,CG43658,CG9005,TREH,DIAP1,CG40006,CPR,CACT,CG7720,SBM,CG5151,ALDH-III,KR-H1,RAW,PUC,BON,MESR3,CG32425,CG42672,CHER,D2HGDH,ACTN,ZASP66,PRM,CG15096,LSD-1,MUC,GCLC,PURA,CG5973,CYP4D21,CG10237,CG3764,CG2865,CG14207,ND-49,CG2201,OBP56D,CG13315,LBK,TRXR-1,VINC,ANXB9,CG11050,CG5191,CG5059,LUBEL,BGM,ZFH1,CLK…
TF	Factor: GAGA; motif: MCTCTCTCCC	TF:M07665	0.138814	0.0894071	0.00117334	2.93057	CG9674,PCB,CG4577,KDN,GLYP,PDK1,SVR,CG6910,CWO,CG10737,STY,CG32369,GSTD1,CG10237,CG2865,CG14207,LBK,SR,MCTP,CG10947,PGD,CREBA,PICOT,BETATUB97EF,CG14661,FNG,THOR,CG12814,PES,FMO-2,CG5080,MSRA,CG5177,CG10527,CG6175,JRA,CG4733,ALPHA-EST10,CG9717,MES2,CG3842,DUOX,AGPAT2,INSC,JEB,PST,PU,TRP1,OUT,CG10560,CG1572,DRAT,LGR1,RPS19A,HEX-A,FER1HCH,KNRL,CG43324,BLW,LPIN,NEDD4,FOXO,CG17549,NRV1,SVP,IF,CG32547,…
TF	Factor: Trl; motif: YYNCTCTCTN; match class: 1	TF:M02323_1	0.0619946	0.0308991	0.00170503	2.76827	SNU,DSX,CG14186,GSTD1,CG2865,CG14207,DL,CREBA,CG14661,FNG,THOR,CG12814,ITP,LOCO,CG6175,CG4733,CG3842,CG13794,MCO1,PU,OUT,RPS19A,HEX-A,KNRL,LPIN,FOXO,CG17646,HOW,FHOS,FER,NRV1,PKCDELTA,CG12290,CAD86C,LBL,RCD2,TEN-M,DPR4,RX,CG31663,RDGB,RGK1,CG12531,DAC,RGL,KNI
TF	Factor: Adf-1; motif: VCGCYGCMGYCGCTGMCNGCG	TF:M00923	0.0121294	0.00193119	0.00210778	2.67617	SVR,CG6175,AOP,CG1640,CG44325,CG6123,CG42339,FKH,CG3823
TF	Factor: CG18599; motif: YTAATTA; match class: 1	TF:M02295_1	0.354447	0.282383	0.0022721	2.64357	FASN1,MEN,IDH,CLIP-190,SHN,SPIN,PDK1,DOR,DP1,TTD14,SNU,CG10737,CG43658,CG9005,TREH,DIAP1,CPR,CACT,CG7720,CG5151,RAW,BON,MESR3,CG32425,CG42672,D2HGDH,ZASP66,LSD-1,GCLC,CG5973,CYP4D21,GPO1,CG14207,ND-49,CG13315,TRXR-1,VINC,ANXB9,LUBEL,BGM,ZFH1,CLK,MCTP,SCP1,TNC,GUKH,VHA100-2,PICOT,H,ADSS,BLOT,CG5009,BETATUB97EF,ACT87E,CPR67B,CG43693,CG7530,SU(R),THOR,CG9837,MFS14,HMGS,GK2,ANXB10,ITP,LOCO,FMO-2,CG94…
TF	Factor: lbl; motif: TAATKA	TF:M02350	0.62938	0.55461	0.00445774	2.35089	FASN1,SERCA,CG9674,PCB,MEN,ENO,KDN,IDH,GPDH1,CLIP-190,SHN,SPIN,PDK1,VIR-1,DOR,GDH,DP1,TTD14,SNU,CG10737,CG43658,CG9005,TREH,DIAP1,CG40006,CG14186,CPR,CACT,CG32369,CG7720,SBM,CG5151,ALDH-III,KR-H1,RAW,PUC,BON,MESR3,CG1648,CG32425,CG42672,CHER,D2HGDH,ACTN,ZASP66,PRM,CG15096,LSD-1,MUC,GCLC,PURA,CG5973,CYP4D21,CG10237,CG3764,CG2865,GPO1,CG14207,ND-49,CG2201,OBP56D,CG13315,LBK,TRXR-1,VINC,USP1,ANXB9,C…
TF	Factor: lbl; motif: TAATKA; match class: 1	TF:M02350_1	0.62938	0.55461	0.00445774	2.35089	FASN1,SERCA,CG9674,PCB,MEN,ENO,KDN,IDH,GPDH1,CLIP-190,SHN,SPIN,PDK1,VIR-1,DOR,GDH,DP1,TTD14,SNU,CG10737,CG43658,CG9005,TREH,DIAP1,CG40006,CG14186,CPR,CACT,CG32369,CG7720,SBM,CG5151,ALDH-III,KR-H1,RAW,PUC,BON,MESR3,CG1648,CG32425,CG42672,CHER,D2HGDH,ACTN,ZASP66,PRM,CG15096,LSD-1,MUC,GCLC,PURA,CG5973,CYP4D21,CG10237,CG3764,CG2865,GPO1,CG14207,ND-49,CG2201,OBP56D,CG13315,LBK,TRXR-1,VINC,USP1,ANXB9,C…
TF	Factor: ftz; motif: TTAATKA	TF:M02343	0.601078	0.528074	0.00781571	2.10703	FASN1,SERCA,CG9674,PCB,MEN,ENO,FRY,KDN,IDH,GPDH1,CLIP-190,SHN,SPIN,PDK1,VIR-1,DOR,GDH,DP1,TTD14,CG6910,CWO,SNU,CG10737,CG43658,CG9005,TREH,DIAP1,CG40006,CPR,CACT,CG32369,CG7720,CG5151,ALDH-III,KR-H1,RAW,PUC,BON,MESR3,CG1648,CG32425,CG42672,CHER,OYS,D2HGDH,ZASP66,LSD-1,MUC,GCLC,PURA,CG5973,CYP4D21,CG10237,CG14207,ND-49,CG2201,OBP56D,CG31324,CG13315,LBK,TRXR-1,VINC,USP1,ANXB9,CG11050,CG5059,LUBEL,B…
TF	Factor: HGTX; motif: NTMATTAN	TF:M07801	0.280323	0.218511	0.00923017	2.03479	CG9674,MEN,KDN,IDH,SHN,VIR-1,DOR,CWO,SNU,CG43658,CG9005,DIAP1,CG40006,CPR,CG7720,ALDH-III,MESR3,CG32425,CG42672,CHER,D2HGDH,ZASP66,LSD-1,PURA,CG5973,CG14207,ND-49,CG2201,OBP56D,CG13315,LBK,TRXR-1,VINC,ANXB9,CG5059,BGM,CLK,WDP,MCTP,SCP1,TNC,CG10947,GUKH,VHA100-2,PICOT,CG5945,BLOT,BETATUB97EF,MENG,CG43693,FNG,SU(R),THOR,CG9837,CG12814,MFS14,CG9399,GK2,ANCE-3,ITP,CG9498,CG14687,ASPH,CG5080,CG5346,GI…
TF	Factor: repo; motif: NYYAATTAAN	TF:M07822	0.210243	0.15707	0.0162601	1.78888	FASN1,MEN,IDH,SPIN,PDK1,DOR,SNU,CG43658,CG9005,DIAP1,CPR,CG5151,RAW,MESR3,CG32425,CG42672,D2HGDH,ZASP66,LSD-1,GCLC,CG5973,CG14207,ND-49,CG13315,VINC,LUBEL,CLK,MCTP,SCP1,TNC,GUKH,VHA100-2,PICOT,ADSS,CG5009,BETATUB97EF,CG7530,SU(R),THOR,CG9837,MFS14,HMGS,ANXB10,ITP,LOCO,CG9498,CG14687,PPL,CG10512,PLH,CG12512,SIDPN,CG5707,NEUROCHONDRIN,NEP7,UDE,NHA1,FIPOQ,LRT,CG9815,CG6972,MCO1,TRE1,TIM,CG13784,SUBD…
TF	Factor: lbl; motif: CTMRTTAN	TF:M07806	0.145553	0.100923	0.0169285	1.77138	MEN,IDH,DOR,SNU,CG43658,CG9005,DIAP1,CPR,CG32425,CG42672,D2HGDH,LSD-1,CG14207,CG13315,VINC,CLK,MCTP,SCP1,TNC,GUKH,VHA100-2,PICOT,BETATUB97EF,SU(R),THOR,CG9837,MFS14,ITP,CG9498,CG14687,PPL,CG10512,PLH,CG12512,SIDPN,CG5707,NEUROCHONDRIN,NEP7,UDE,NHA1,FIPOQ,LRT,CG9815,CG6972,MCO1,TRE1,TIM,SUBDUED,CG10560,ENT2,CG16743,DRM,DSB,DROJ2,RPS9,CG9034,HSC70-4,CG44247,SRL,CG43324,CG13096,CG4968,CG10341,TRPL,S…
TF	Factor: Ems; motif: NTMATTAN; match class: 1	TF:M07789_1	0.648248	0.581074	0.0239674	1.62038	FASN1,SERCA,CG9674,PCB,MEN,ENO,MACON1,KDN,IDH,GPDH1,CLIP-190,SHN,SPIN,PDK1,VIR-1,DOR,GDH,DP1,TTD14,SNU,CG10737,CG43658,CG9005,TREH,DIAP1,CG40006,CG14186,CPR,CACT,CG32369,CG7720,SBM,CG5151,ALDH-III,KR-H1,RAW,PUC,BON,MESR3,CG1648,CG32425,CG42672,CHER,D2HGDH,ACTN,ZASP66,PRM,CG15096,LSD-1,MUC,GCLC,PURA,CG5973,CYP4D21,CG10237,CG3764,CG2865,GPO1,CG14207,ND-49,CG2201,OBP56D,MTPALPHA,CG13315,LBK,TRXR-1,V…
TF	Factor: Trl; motif: YYNCTCTCTN	TF:M02323	0.121294	0.0819684	0.031255	1.50508	FASN1,PCB,PDK1,CWO,SNU,DSX,CG14186,D2HGDH,GSTD1,CG2865,CG14207,DL,CREBA,PICOT,CG14661,FNG,THOR,CG12814,PES,ANCE-3,ITP,LOCO,B,CG10527,CG6175,CG4733,ALPHA-EST10,PLH,CG12512,FATP3,TEP3,MOL,CG3842,CG13428,CG13794,AGPAT2,INSC,MCO1,PISD,PU,TRP1,OUT,RPS19A,ND-B12,SAM-S,HEX-A,KNRL,SLS,LPIN,CG30069,CG4928,FOXO,CG17646,NRV2,HOW,FHOS,FER,NRV1,IF,NAPRT,UIF,PKCDELTA,CG12290,CAD86C,LBL,CG31103,CG6225,RCD2,CYP1…
TF	Factor: Hairy; motif: NNGGCACGCGMCNN	TF:M00067	0.102426	0.0664473	0.0317939	1.49766	MEN,ENO,VIR-1,HR38,SCAMC,CG7720,ALDH-III,CG42672,D2HGDH,S6K,SR,VHA100-2,MP20,PLE,CG17111,CG9399,ASPH,CG14688,SP1,CG4733,CG3842,CG15544,CG32032,MFS9,IRK1,CG5909,TIM,MOE,PST,CG5958,ELAL,NOP60B,CG31126,RPS19A,ATPSYNF,CG8369,CG15021,SAM-S,HACD1,VPS60,MAX,CG13096,CG43078,CG18135,UNC-89,DNR1,UZIP,CG44085,NRV1,CG2841,HIL,CG12746,DIP-ETA,CG12344,SS,R-L,BALDSPOT,NVY,DAT,MCT1,DHPD,WMD,SDT,CG31522,PXN,CG423…
TF	Factor: Adf-1; motif: CCGCYGCYGYNGCCGV	TF:M00171	0.0579515	0.0319004	0.03671	1.43522	SVR,CG3036,UQCR-C1,KR-H1,MESR3,CG2865,CG42390,TNC,CG5023,CG6175,SP1,CG4733,CG4374,SIDPN,KAH,ZNT77C,AOP,SLF,ACHL,NOPP140,MAX,CG46385,CAP,CG1640,NEDD4,CG30069,UZIP,CG6231,CG44325,GRIP,CG15890,CG5599,SOX15,CG6123,COREST,E,WMD,GRASS,SDT,CG42339,RGL,FKH,CG3823
HP	Thyrotoxicosis with diffuse goiter	HP:0011784	0.0262009	0.00248447	0.0057963	2.23685	IRK1,LGR1,CLC-C,NCC69,CLC-A,IRK2
HP	Muscle spasm	HP:0003394	0.122271	0.0521739	0.0230112	1.63806	GLYP,VPS13,CG14207,MTPALPHA,ANXB9,CG8306,CG6701,ANXB11,IRK1,OUT,CG5065,WAT,CLC-C,SRL,CG8051,LPIN,PFK,NCC69,CLC-A,PGK,MTPBETA,HIL,CPT2,CG12268,CG1358,CG7997,MCT1,IRK2
HP	Exercise-induced muscle fatigue	HP:0009020	0.0305677	0.00434783	0.036049	1.44311	IRK1,OUT,CG8051,PFK,PGK,MCT1,IRK2

## Sheet: WH-only
source	term_name	term_id	GeneRatio	BgRatio	adjusted_p_value	negative_log10_of_adjusted_p_value	geneID
GO:MF	binding	GO:0005488	0.588448	0.708155	2.96e-09	8.52902	ACC,MHC,XRP1,ATPCL,CV-C,CHC,CG8036,PRAGE,CG31729,ATG1,UP,USP32,SWS,LETM1,DLG5,RASGAP1,WUPA,KLP98A,TM2,UBI-P63E,SEV,EGL,AOX3,CG8485,CDM,ALIX,CG9336,HSF,GFAT1,MLC1,CV-2,CAH2,RDOG,SCPX,MDR49,MLP60A,CG7115,MTF-1,RHOGAP15B,L(2)K01209,CG8399,SNP,SDHC,C12.2,CTPSYN,SPG7,PEX5,CG4239,RPN9,CCT7,SP7,DIP-C,CG17919,HSC70-1,OBP19B,POLY,TPNC41C,CYP4E3,CG4945,CG7560,CYP4E1,CG10352,SER,UNC-4,GS2,EIF4G1,GLUT4EF,MNT…
GO:MF	RNA binding	GO:0003723	0.0621274	0.128755	4.68e-09	8.32932	EGL,EIF4G1,CNBP,ROQ,EIF2BETA,VIG2,U2AF50,CG32344,MRPL24,NOP56,CG1785,SRP9,SRP19,FIB,L(1)G0020,NPH,CG6712,MRPL18,PS,RBP6,SHEP,PABP,HRB27C,BOL,AGO1,RM62,SQD,LARP4B,RBP1-LIKE,ATX2,RPL6,MAHE,STAU,TRAL,IMP,SSX,HRB98DE,RPL14,CNOT4,DCP2,CG4612,RPS11,RPL12,RPL9,RPS27,RPS13,EIF4H1,RPS20,FMR1,HRG,EIF4E1,CG3198,NELF-A,EDC3,CG1316,CG8963,CG4364,HRB87F,RB97D,RSF1,EIF3G1,QKR58E-1,NCM,EIF1,CG5316,CG7878,LSM12A,…
GO:MF	mRNA binding	GO:0003729	0.0199815	0.0572246	4e-07	6.39777	EGL,EIF4G1,CNBP,ROQ,EIF2BETA,U2AF50,PS,RBP6,SHEP,PABP,HRB27C,BOL,RM62,SQD,LARP4B,RBP1-LIKE,ATX2,STAU,TRAL,IMP,SSX,HRB98DE,CG4612,EIF4H1,FMR1,CG3198,EDC3,CG1316,HRB87F,RB97D,EIF3G1,QKR58E-1,CG9705,SF3B6,CG4806,MRPS11,CG3335,SBP2,CBP20,SNRNP-U1-C
GO:MF	organic cyclic compound binding	GO:0097159	0.263874	0.360515	1.32873e-06	5.87656	ACC,MHC,XRP1,ATPCL,CG8036,PRAGE,CG31729,ATG1,KLP98A,SEV,EGL,AOX3,CG8485,HSF,RDOG,MDR49,MTF-1,L(2)K01209,SNP,C12.2,CTPSYN,SPG7,CCT7,HSC70-1,CYP4E3,CG4945,CG7560,CYP4E1,UNC-4,GS2,EIF4G1,GLUT4EF,MNT,CNBP,GOL,VRI,GNMT,RAB11,ROQ,ERF3,RAB10,CG8814,EIF3J,CG6870,EIF2BETA,VIG2,EEF1DELTA,U2AF50,RAB6,RABX1,CG11811,CG2608,CG2199,CG32344,RS1,MRPL24,FKBP39,CG8414,CG1236,NOP56,CG1785,NCLB,SRP9,SRP19,FIB,L(1)G00…
GO:MF	mRNA 3'-UTR binding	GO:0003730	0.00402989	0.0214592	1.60281e-05	4.79512	SHEP,PABP,HRB27C,BOL,SQD,LARP4B,STAU,IMP,SSX,HRB98DE,CG4612,FMR1,HRB87F,CG9705,SBP2
GO:MF	nucleic acid binding	GO:0003676	0.163294	0.23319	0.00016365	3.78608	XRP1,PRAGE,EGL,HSF,MTF-1,SNP,UNC-4,EIF4G1,GLUT4EF,MNT,CNBP,GOL,VRI,ROQ,ERF3,EIF3J,EIF2BETA,VIG2,EEF1DELTA,U2AF50,CG2608,CG2199,CG32344,RS1,MRPL24,FKBP39,NOP56,CG1785,NCLB,SRP9,SRP19,FIB,L(1)G0020,NPH,CG6712,MRPL18,DMRT99B,PS,RBP6,SHEP,LOLA,MAMO,PABP,PDP1,HRB27C,BOL,EEF1ALPHA2,AGO1,RM62,SCRT,SQD,CG45050,HIS3.3B,LARP4B,RBP1-LIKE,CG12605,CORTO,ATX2,RPL6,MAHE,STAU,TRF2,TRAL,IMP,SSX,HRB98DE,CG,RPL14,C…
GO:MF	structural constituent of ribosome	GO:0003735	0.0150281	0.0414878	0.000170142	3.76919	RPS21,RPL24-LIKE,MRPL24,MRPL30,RPLP0-LIKE,MRPL19,MRPL18,RPS7,RPS29,RPL6,RPS23,RPL14,RPL28,RPS28B,RPS11,RPL12,RPL9,RPS27,RPS13,RPS20,CG14184,MRPS26,MRPS11,MRPL47,MRPS14,MRPL9,MRPL27,MRPL33,MRPS33
GO:MF	poly-purine tract binding	GO:0070717	0.00100747	0.0100143	0.000441643	3.35493	SHEP,PABP,HRB27C,SSX,HRB98DE,CG4612,HRB87F
GO:MF	GTPase activity	GO:0003924	0.0125934	0.0357654	0.00060242	3.2201	RAB11,ERF3,RAB10,RAB6,RABX1,EEF1ALPHA2,RAB3,RAB5,RHO1,EIF5B,SAR1,RAP1,RAB2,RAB7,GALPHAS,RAN,RAB14,CDC42,ARL8,RAC1,RHEB,RAP2L,RAGC-D,RABX4,ARL1
GO:MF	translation regulator activity	GO:0045182	0.00889934	0.0286123	0.000906745	3.04251	EIF4G1,CNBP,ERF3,EIF3J,EIF2BETA,EEF1DELTA,HRB27C,BOL,EEF1ALPHA2,EIF5B,EIF4H1,FMR1,EIF4E1,NELF-A,CG8963,EIF3H,EIF3G1,EIF1,EIF3K,TFIIS
GO:MF	single-stranded RNA binding	GO:0003727	0.00352615	0.0171674	0.00102043	2.99122	CNBP,U2AF50,RBP6,SHEP,PABP,HRB27C,AGO1,SSX,HRB98DE,CG4612,EIF4H1,HRB87F
GO:MF	translation regulator activity, nucleic acid binding	GO:0090079	0.00805978	0.0257511	0.00309	2.51004	EIF4G1,ERF3,EIF3J,EIF2BETA,EEF1DELTA,BOL,EEF1ALPHA2,EIF5B,EIF4H1,FMR1,EIF4E1,NELF-A,CG8963,EIF3H,EIF3G1,EIF1,EIF3K,TFIIS
GO:MF	guanyl ribonucleotide binding	GO:0032561	0.0164554	0.0386266	0.00917364	2.03746	RAB11,ERF3,RAB10,RAB6,RABX1,EEF1ALPHA2,RAB3,RAB5,RHO1,EIF5B,SAR1,RAP1,RAB2,RAB7,GALPHAS,RAN,RAB14,CDC42,ARL8,RAC1,RHEB,RAP2L,RAGC-D,RABX4,ARL1,PEPCK2,STING
GO:MF	guanyl nucleotide binding	GO:0019001	0.0164554	0.0386266	0.00917364	2.03746	RAB11,ERF3,RAB10,RAB6,RABX1,EEF1ALPHA2,RAB3,RAB5,RHO1,EIF5B,SAR1,RAP1,RAB2,RAB7,GALPHAS,RAN,RAB14,CDC42,ARL8,RAC1,RHEB,RAP2L,RAGC-D,RABX4,ARL1,PEPCK2,STING
GO:MF	translation factor activity, RNA binding	GO:0008135	0.00646461	0.0214592	0.0105184	1.97805	EIF4G1,ERF3,EIF3J,EIF2BETA,EEF1DELTA,EEF1ALPHA2,EIF5B,EIF4H1,EIF4E1,NELF-A,EIF3H,EIF3G1,EIF1,EIF3K,TFIIS
GO:MF	GTP binding	GO:0005525	0.0158677	0.037196	0.0131368	1.88151	RAB11,ERF3,RAB10,RAB6,RABX1,EEF1ALPHA2,RAB3,RAB5,RHO1,EIF5B,SAR1,RAP1,RAB2,RAB7,GALPHAS,RAN,RAB14,CDC42,ARL8,RAC1,RHEB,RAP2L,RAGC-D,RABX4,ARL1,PEPCK2
GO:MF	ubiquitin-like protein conjugating enzyme activity	GO:0061650	0.00260264	0.0128755	0.0152438	1.81691	EFF,CG7220,UBC6,UBCE2H,CG8188,UBC4,UBC10,UBCE2M,UFC1
GO:MF	poly(U) RNA binding	GO:0008266	0.000755604	0.00715308	0.0220283	1.65702	RBP6,SHEP,PABP,SSX,CG4612
GO:MF	poly-pyrimidine tract binding	GO:0008187	0.00117538	0.00858369	0.0248265	1.60508	U2AF50,RBP6,SHEP,PABP,SSX,CG4612
GO:BP	cellular process	GO:0009987	0.731668	0.874136	8.92e-19	18.0497	ACC,XRP1,ATPCL,CV-C,SCYL,CHC,CG9297,EMP,PRAGE,CG31729,INOS,CATHD,ATG1,UP,SWS,LETM1,SCCPDH1,CG1607,DLG5,RASGAP1,WUPA,KLP98A,TM2,UBI-P63E,SEV,EGL,AOX3,CG8485,CG9485,CDM,ALIX,CG9336,MVL,HSF,INE,GFAT1,CV-2,CAH2,TMEM63,CG45076,RDOG,SCPX,CG8839,DIC1,MDR49,MLP60A,CG7115,MTF-1,RHOGAP15B,L(2)K01209,CG8399,CG9572,SNP,SDHC,CTPSYN,CG1441,SPG7,PEX5,MGSTL,CG4239,CCT7,SP7,SUGB,CG11200,HSC70-1,CG15279,GRIK,POLY,…
GO:BP	amide biosynthetic process	GO:0043604	0.0464619	0.109267	5.39e-10	9.26842	ACC,ATPCL,EGL,CG12866,EIF4G1,CNBP,ERF3,RPS21,EIF3J,EIF2BETA,EEF1DELTA,RPL24-LIKE,MRPL24,MRPL30,SRP9,RPLP0-LIKE,DPH5,MRPL19,MRPL18,RBP6,LOLA,PABP,HRB27C,BOL,EEF1ALPHA2,AGO1,RM62,SQD,LARP4B,TYF,RPS7,ATX2,RPS29,RPL6,STAU,RPS23,IMP,HRB98DE,KRA,RPL14,RPL28,CG4612,RPS28B,RPS11,RPL12,RPL9,RPS27,EIF5B,RPS13,EIF4H1,RPS20,FMR1,EIF4E1,VVL,NELF-A,CG15771,CG8963,EIF3H,CASP,EIF3G1,SIP3,EIF1,SCHLANK,NTF-2,RHEB,…
GO:BP	peptide biosynthetic process	GO:0043043	0.0422692	0.102351	7.22e-10	9.14168	EGL,EIF4G1,CNBP,ERF3,RPS21,EIF3J,EIF2BETA,EEF1DELTA,RPL24-LIKE,MRPL24,MRPL30,SRP9,RPLP0-LIKE,DPH5,MRPL19,MRPL18,RBP6,LOLA,PABP,HRB27C,BOL,EEF1ALPHA2,AGO1,RM62,SQD,LARP4B,TYF,RPS7,ATX2,RPS29,RPL6,STAU,RPS23,IMP,HRB98DE,KRA,RPL14,RPL28,CG4612,RPS28B,RPS11,RPL12,RPL9,RPS27,EIF5B,RPS13,EIF4H1,RPS20,FMR1,EIF4E1,VVL,NELF-A,CG8963,EIF3H,CASP,EIF3G1,SIP3,EIF1,NTF-2,RHEB,EIF3K,TFIIS,CG14184,MRPS26,MRPS11,…
GO:BP	translation	GO:0006412	0.0379909	0.0954357	7.87e-10	9.1039	EGL,EIF4G1,CNBP,ERF3,RPS21,EIF3J,EIF2BETA,EEF1DELTA,RPL24-LIKE,MRPL24,MRPL30,SRP9,RPLP0-LIKE,DPH5,MRPL19,MRPL18,RBP6,PABP,HRB27C,BOL,EEF1ALPHA2,AGO1,RM62,SQD,LARP4B,TYF,RPS7,ATX2,RPS29,RPL6,STAU,RPS23,IMP,HRB98DE,KRA,RPL14,RPL28,CG4612,RPS28B,RPS11,RPL12,RPL9,RPS27,EIF5B,RPS13,EIF4H1,RPS20,FMR1,EIF4E1,NELF-A,CG8963,EIF3H,EIF3G1,SIP3,EIF1,RHEB,EIF3K,TFIIS,CG14184,MRPS26,MRPS11,SBP2,MRPL47,MRPS14,M…
GO:BP	ribonucleoprotein complex biogenesis	GO:0022613	0.0298622	0.0816044	1.11e-09	8.95558	SNP,RPS21,EIF3J,EIF2BETA,RPL24-LIKE,NMD3,NNP-1,CG32344,CG8414,NOP56,CG1785,NCLB,CG12325,FIB,RBM13,RPLP0-LIKE,L(1)G0020,CG6712,AGO1,RPS7,RPL6,RPL14,SRPK,RPS28B,RPS27,RPS13,EIF4H1,CG3198,FBXO11,EIF3H,CG4364,RAN,EIF3G1,CG3008,EIF1,RHEB,EIF3K,CG12608,CG8611,CG11417,FRG1,L(2)09851,MRPS11,CG5645,CG5800,CG2972,CG7275,SAS10,CG11180,CG11583,CG9004,DBE,CG12301,RLB1,CG18178,SNRPG,CG1789,POP1,SNRNP-U1-C
GO:BP	positive regulation of biological process	GO:0048518	0.160007	0.257261	3.42e-09	8.46639	CV-C,CHC,ATG1,RASGAP1,TM2,CDM,ALIX,CG9336,MVL,HSF,CV-2,SCPX,MTF-1,CG9572,SP7,POLY,ODA,TOK,CNBP,VRI,SU(DX),RAB11,CV-D,ROQ,SEC61ALPHA,AKIRIN,FKBP14,USP8,U2AF50,CG6805,ADI1,RABX1,CG2199,NCLB,DPH5,DMRT99B,SH,PS,CAM,LK6,NORPA,RIM,LOLA,14-3-3ZETA,PABP,NSYB,PDP1,DYSC,COW,SGG,IH,HRB27C,BOL,MOB2,QVR,AGO1,WDB,14-3-3EPSILON,HK,CG45050,LARP4B,CG6329,CTP,DOPECR,TNA,FLW,VMAT,TYF,SLIK,WNK,ATX2,LSD-2,STAU,CKIALP…
GO:BP	ribosome biogenesis	GO:0042254	0.021648	0.0636238	3.07e-08	7.51291	SNP,RPS21,RPL24-LIKE,NMD3,NNP-1,CG32344,CG8414,NOP56,CG1785,NCLB,CG12325,FIB,RBM13,RPLP0-LIKE,L(1)G0020,CG6712,RPS7,RPL6,RPL14,RPS28B,RPS27,RPS13,CG4364,RAN,CG3008,RHEB,CG12608,CG8611,CG11417,FRG1,L(2)09851,MRPS11,CG5645,CG5800,CG2972,CG7275,SAS10,CG11180,CG11583,CG9004,DBE,CG12301,RLB1,CG18178,CG1789,POP1
GO:BP	regulation of protein metabolic process	GO:0051246	0.0430393	0.0982019	3.83e-08	7.41678	SWS,EGL,ODA,EIF4G1,CNBP,RPS21,EIF3J,USP8,RABX1,SRP9,DPH5,RBP6,LK6,PABP,SGG,HRB27C,BOL,MOB2,AGO1,WDB,RM62,SQD,LARP4B,TYF,SLIK,ATX2,STAU,CKIALPHA,IMP,HRB98DE,ATG8A,KRA,CG4612,RANBPM,MTS,ATG17,RHO1,KEK1,CYT-C-P,CKIIBETA,UBC6,CG8405,ROK,FMR1,ARI-1,EIF4E1,UBCE2H,CBL,CG8963,EIF3H,ELOB,SKPA,CASP,CDC42,ENDOS,SIP3,EIF1,ABI,SCCRO4,RAC1,RHEB,CCM3,EIF3K,REG,STUB1,CKA,WDS,SBP2,MAT1,RPT6,CG13994
GO:BP	peptide metabolic process	GO:0006518	0.0509968	0.109267	6.67e-08	7.17603	EGL,EIF4G1,CNBP,ERF3,RPS21,EIF3J,EIF2BETA,EEF1DELTA,RPL24-LIKE,GSTE3,MRPL24,MRPL30,SRP9,RPLP0-LIKE,DPH5,MRPL19,MRPL18,CG4829,GSTD9,RBP6,LOLA,PABP,HRB27C,BOL,EEF1ALPHA2,AGO1,RM62,SQD,LARP4B,TYF,RPS7,ATX2,RPS29,RPL6,STAU,RPS23,IMP,HRB98DE,KRA,RPL14,RPL28,CG4612,RPS28B,RPS11,RPL12,RPL9,RPS27,EIF5B,RPS13,EIF4H1,RPS20,FMR1,EIF4E1,VVL,NELF-A,CG8963,EIF3H,CASP,EIF3G1,SIP3,EIF1,NTF-2,RHEB,EIF3K,TFIIS,SPA…
GO:BP	cellular metabolic process	GO:0044237	0.42774	0.543568	7.87e-08	7.10392	ACC,XRP1,ATPCL,CHC,PRAGE,INOS,ATG1,SWS,SCCPDH1,KLP98A,UBI-P63E,SEV,EGL,AOX3,CG8485,CG9485,HSF,GFAT1,CAH2,CG8839,CG7115,MTF-1,L(2)K01209,SNP,SDHC,CTPSYN,CG1441,SPG7,CCT7,SP7,CG11200,HSC70-1,POLY,FATP2,CG11425,SPIRIT,CG4945,CG7560,CG10352,CG2065,CG12866,UNC-4,GS2,EIF4G1,GLUT4EF,MNT,PAPLA1,MKP3,TOK,CNBP,VRI,GNMT,ROQ,ERF3,CG6330,SEC61ALPHA,RPS21,HYDR2,AKIRIN,CG8814,EIF3J,EIF2BETA,NAA30A,EEF1DELTA,U2A…
GO:BP	cellular localization	GO:0051641	0.106357	0.183956	8.48e-08	7.07139	CV-C,CHC,CG9297,ATG1,SWS,LETM1,KLP98A,EGL,CDM,ALIX,CG45076,SCPX,PEX5,PAPLA1,SU(DX),RAB11,MAPMODULIN,SEC61ALPHA,CG13887,RAB10,GP210,CG11857,SURF4,ERGIC53,KDELR,TOM40,U2AF50,RAB6,SEC22,REEPB,SEC61BETA,P24-1,RABX1,BAI,NMD3,SEC61GAMMA,SRP9,SRP19,LOJ,GAMMASNAP1,NORPA,RIM,14-3-3ZETA,NSYB,COW,SGG,BSG,IH,HRB27C,14-3-3EPSILON,SQD,CTP,FLW,VMAT,ENS,RAB3,SLIK,LSD-2,FER2LCH,STAU,FRQ1,INAD,VAP33,TRAL,CHIC,CNX9…
GO:BP	amide metabolic process	GO:0043603	0.0592967	0.118949	2.77e-07	6.55722	ACC,ATPCL,EGL,CG1441,CG12866,EIF4G1,CNBP,ERF3,RPS21,EIF3J,EIF2BETA,EEF1DELTA,RPL24-LIKE,GSTE3,MRPL24,MRPL30,SRP9,CG8303,RPLP0-LIKE,DPH5,MRPL19,MRPL18,CG4829,GSTD9,RBP6,LOLA,PABP,HRB27C,BOL,EEF1ALPHA2,AGO1,RM62,SQD,LARP4B,TYF,RPS7,ATX2,RPS29,RPL6,STAU,RPS23,IMP,HRB98DE,KRA,RPL14,RPL28,CG4612,RPS28B,RPS11,RPL12,RPL9,RPS27,EIF5B,RPS13,EIF4H1,RPS20,FMR1,EIF4E1,VVL,NELF-A,CG15771,CG8963,EIF3H,CASP,EIF…
GO:BP	positive regulation of protein metabolic process	GO:0051247	0.0201078	0.0567082	1.3844e-06	5.85874	ODA,CNBP,RABX1,DPH5,LK6,PABP,SGG,HRB27C,BOL,MOB2,LARP4B,TYF,SLIK,CKIALPHA,HRB98DE,CG4612,RANBPM,ATG17,RHO1,CYT-C-P,UBC6,CG8405,FMR1,ARI-1,UBCE2H,CG8963,ELOB,SKPA,CDC42,SIP3,ABI,SCCRO4,RAC1,RHEB,CCM3,REG,STUB1,CKA,WDS,MAT1,RPT6
GO:BP	establishment of localization in cell	GO:0051649	0.0672542	0.125864	2.98819e-06	5.52459	CV-C,CHC,CG9297,ATG1,LETM1,KLP98A,EGL,CDM,ALIX,SCPX,PEX5,PAPLA1,SU(DX),RAB11,MAPMODULIN,SEC61ALPHA,CG13887,GP210,ERGIC53,KDELR,U2AF50,RAB6,SEC22,REEPB,SEC61BETA,P24-1,RABX1,BAI,NMD3,SEC61GAMMA,LOJ,GAMMASNAP1,RIM,NSYB,SGG,IH,SQD,CTP,FLW,VMAT,ENS,RAB3,SLIK,LSD-2,FER2LCH,STAU,FRQ1,VAP33,TRAL,RAB5,RANBPM,RHO1,PP1-87B,DLIC,UBC6,KAP-ALPHA3,FRQ2,ROK,SAR1,FMR1,RAP1,RAB2,RAB7,STAM,RAN,RHOGAP68F,NUDE,SCAMP…
GO:BP	rRNA processing	GO:0006364	0.0150595	0.0456432	9.36433e-06	5.02852	SNP,RPS21,NNP-1,CG32344,CG8414,NOP56,CG1785,NCLB,CG12325,FIB,RBM13,RPLP0-LIKE,L(1)G0020,CG6712,RPS7,RPS28B,CG4364,CG3008,CG11417,FRG1,MRPS11,CG5645,CG5800,CG2972,CG7275,SAS10,CG11583,DBE,CG12301,RLB1,CG18178,CG1789,POP1
GO:BP	gene expression	GO:0010467	0.235561	0.325035	1.12877e-05	4.94739	EGL,HSF,MTF-1,SNP,SPG7,CCT7,HSC70-1,POLY,SPIRIT,UNC-4,EIF4G1,GLUT4EF,MNT,TOK,CNBP,VRI,ROQ,ERF3,RPS21,AKIRIN,EIF3J,EIF2BETA,NAA30A,EEF1DELTA,U2AF50,RPL24-LIKE,CG9911,NNP-1,CG7872,CG2199,CG32344,MRPL24,MRPL30,NO66,CG8414,PFDN5,NOP56,CG1785,NCLB,SRP9,CG12325,FIB,RBM13,RPLP0-LIKE,DPH5,MRPL19,L(1)G0020,CG6712,MRPL18,DMRT99B,PS,RBP6,LOLA,MAMO,14-3-3ZETA,PABP,PDP1,HRB27C,BOL,EEF1ALPHA2,AGO1,14-3-3EPSILO…
GO:BP	export from cell	GO:0140352	0.0207923	0.055325	1.24777e-05	4.90387	CHC,LETM1,ALIX,RAB11,RAB10,RAB6,SEC22,LST,P24-1,BAI,GAMMASNAP1,ATPALPHA,RIM,NRV3,NSYB,IH,RAB3,FRQ1,VAP33,FLO2,RIP11,FRQ2,SAR1,TBC,RAP1,RAB2,RAB7,TANGO5,SCAMP,CANB,CDC42,TSR,SYX5,SNX3,ARL8,RABX4,ATG6,GB,ARL1,OBP56H
GO:BP	establishment of protein localization	GO:0045184	0.0490288	0.0982019	1.26172e-05	4.89904	CHC,CDM,CG45076,PEX5,SU(DX),RAB11,SEC61ALPHA,CG13887,RAB10,GP210,SURF4,KDELR,TOM40,RAB6,SEC22,SEC61BETA,P24-1,RABX1,BAI,NMD3,SEC61GAMMA,SRP9,SRP19,LOJ,GAMMASNAP1,RIM,COW,SGG,RAB3,TRAL,RAB5,RANBPM,LAMP1,RHO1,FLO2,RIP11,KAP-ALPHA3,ROK,SAR1,TBC,RAB2,STAM,TANGO5,SAU,RAN,SCAMP,CG9132,RAB14,VPS26,TSR,MGE,SYX5,SNX3,ARL8,NTF-2,EMC7,CG8206,SGT,TOM7,RABX4,SPASE22-23,EMC4,ZETACOP,NMD,ATG6,BOCA,VPS29,ARL1,EM…
GO:BP	biological regulation	GO:0065007	0.396167	0.495159	1.90321e-05	4.72051	XRP1,CV-C,SCYL,CHC,CG31729,ATG1,UP,SWS,LETM1,DLG5,RASGAP1,TM2,SEV,EGL,CG8485,CDM,ALIX,CG9336,MVL,HSF,INE,MLC1,CV-2,SCPX,MTF-1,RHOGAP15B,CG9572,SP7,CG11200,GRIK,POLY,GADD45,CG11425,CG2065,SER,UNC-4,VHA16-1,ODA,EIF4G1,VSG,GLUT4EF,MNT,MKP3,TOK,CNBP,CG10433,VRI,COL4A1,SU(DX),GNMT,RAB11,CV-D,ROQ,SEC61ALPHA,RPS21,RAB10,HYDR2,AKIRIN,EIF3J,FKBP14,USP8,U2AF50,RAB6,SEC22,CG6805,LST,REEPB,SEC61BETA,ADI1,P24…
GO:BP	positive regulation of cellular process	GO:0048522	0.143151	0.217151	2.1372e-05	4.67015	CV-C,CHC,ATG1,RASGAP1,TM2,CDM,ALIX,CG9336,MVL,HSF,CV-2,SCPX,MTF-1,CG9572,SP7,POLY,TOK,CNBP,SU(DX),RAB11,CV-D,ROQ,SEC61ALPHA,AKIRIN,FKBP14,USP8,U2AF50,CG6805,CG2199,NCLB,DPH5,DMRT99B,PS,CAM,LK6,NORPA,RIM,LOLA,14-3-3ZETA,PABP,NSYB,PDP1,DYSC,COW,SGG,HRB27C,BOL,MOB2,QVR,AGO1,WDB,14-3-3EPSILON,HK,CG45050,LARP4B,CG6329,CTP,DOPECR,TNA,FLW,VMAT,TYF,SLIK,WNK,ATX2,STAU,CKIALPHA,CG8677,CYCT,TRAL,IMP,CHIC,HR…
GO:BP	intracellular transport	GO:0046907	0.0537349	0.103734	2.34192e-05	4.63043	CHC,CG9297,ATG1,KLP98A,EGL,CDM,SCPX,PEX5,PAPLA1,SU(DX),RAB11,MAPMODULIN,SEC61ALPHA,CG13887,GP210,ERGIC53,KDELR,U2AF50,RAB6,SEC22,REEPB,SEC61BETA,P24-1,RABX1,BAI,NMD3,SEC61GAMMA,LOJ,GAMMASNAP1,RIM,SGG,SQD,FLW,ENS,RAB3,LSD-2,STAU,VAP33,TRAL,RAB5,RANBPM,RHO1,DLIC,UBC6,KAP-ALPHA3,ROK,SAR1,FMR1,RAB2,RAB7,STAM,RAN,RHOGAP68F,NUDE,RAB14,VPS26,MGE,SYX5,SNX3,ARL8,HOOK,NTF-2,CG30423,TOM7,DLC90F,YKT6,ZETACOP…
GO:BP	secretion	GO:0046903	0.0213057	0.055325	2.52917e-05	4.59702	CHC,LETM1,ALIX,RAB11,RAB10,RAB6,SEC22,LST,P24-1,BAI,GAMMASNAP1,RIM,NSYB,IH,RAB3,FRQ1,VAP33,FLO2,RIP11,FRQ2,SAR1,TBC,RAP1,RAB2,RAB7,TANGO5,SCAMP,CANB,CDC42,DH44,TSR,SYX5,SNX3,ARL8,RABX4,GIIISPLA2,ATG6,GB,ARL1,OBP56H
GO:BP	establishment of localization	GO:0051234	0.182853	0.262794	2.90267e-05	4.5372	CV-C,CHC,CG9297,EMP,CG31729,ATG1,LETM1,CG1607,KLP98A,EGL,CDM,ALIX,CG9336,MVL,INE,TMEM63,CG45076,RDOG,SCPX,DIC1,MDR49,CG8399,PEX5,CG4239,SUGB,HSC70-1,CG15279,GRIK,FATP2,AQP,CG12866,VHA16-1,GLUT4EF,PAPLA1,CG10960,SU(DX),RAB11,CV-D,MAPMODULIN,SEC61ALPHA,CG3829,CG13887,RAB10,GP210,CG11857,SURF4,ERGIC53,KDELR,TOM40,U2AF50,RAB6,SEC22,LST,REEPB,SEC61BETA,CG7272,P24-1,RABX1,BAI,NMD3,OSTGAMMA,SEC61GAMMA,Z…
GO:BP	regulation of biological process	GO:0050789	0.372636	0.46888	3.49086e-05	4.45707	XRP1,CV-C,SCYL,CHC,ATG1,UP,SWS,LETM1,DLG5,RASGAP1,TM2,SEV,EGL,CG8485,CDM,ALIX,CG9336,MVL,HSF,INE,CV-2,SCPX,MTF-1,RHOGAP15B,CG9572,SP7,GRIK,POLY,GADD45,CG11425,SER,UNC-4,ODA,EIF4G1,VSG,GLUT4EF,MNT,MKP3,TOK,CNBP,VRI,COL4A1,SU(DX),GNMT,RAB11,CV-D,ROQ,SEC61ALPHA,RPS21,RAB10,HYDR2,AKIRIN,EIF3J,FKBP14,USP8,U2AF50,RAB6,SEC22,CG6805,LST,REEPB,SEC61BETA,ADI1,P24-1,RABX1,BAI,CG2199,SEC61GAMMA,FKBP39,NO66,P…
GO:BP	secretion by cell	GO:0032940	0.0199367	0.0525588	3.77617e-05	4.42295	CHC,LETM1,ALIX,RAB11,RAB10,RAB6,SEC22,LST,P24-1,BAI,GAMMASNAP1,RIM,NSYB,IH,RAB3,FRQ1,VAP33,FLO2,RIP11,FRQ2,SAR1,TBC,RAP1,RAB2,RAB7,TANGO5,SCAMP,CANB,CDC42,TSR,SYX5,SNX3,ARL8,RABX4,ATG6,GB,ARL1,OBP56H
GO:BP	regulation of translation	GO:0006417	0.0136904	0.0414938	4.48866e-05	4.34788	EGL,EIF4G1,CNBP,RPS21,EIF3J,SRP9,DPH5,RBP6,PABP,HRB27C,BOL,AGO1,RM62,SQD,LARP4B,TYF,ATX2,STAU,IMP,HRB98DE,KRA,CG4612,FMR1,EIF4E1,CG8963,SIP3,EIF1,RHEB,EIF3K,SBP2
GO:BP	organonitrogen compound biosynthetic process	GO:1901566	0.0883032	0.147994	4.79626e-05	4.3191	ACC,ATPCL,EGL,GFAT1,L(2)K01209,CTPSYN,CG7560,CG12866,GS2,EIF4G1,PAPLA1,CNBP,GNMT,ERF3,RPS21,EIF3J,EIF2BETA,EEF1DELTA,RPL24-LIKE,CG11334,ADI1,ALG1,OSTGAMMA,SAMDC,MRPL24,MRPL30,SRP9,RPLP0-LIKE,DPH5,MRPL19,MRPL18,RBP6,LOLA,PABP,HRB27C,BOL,EEF1ALPHA2,AGO1,RM62,SQD,LARP4B,TYF,RPS7,ATX2,RPS29,RPL6,STAU,RPS23,IMP,HRB98DE,CNX99A,KRA,RPL14,RPL28,CG4612,RPS28B,RPS11,RPL12,RPL9,RPS27,EIF5B,RPS13,EIF4H1,RPS2…
GO:BP	regulation of amide metabolic process	GO:0034248	0.0179687	0.0484094	7.60132e-05	4.11911	EGL,EIF4G1,CNBP,RPS21,EIF3J,SRP9,DPH5,RBP6,LOLA,PABP,HRB27C,BOL,AGO1,RM62,SQD,LARP4B,TYF,ATX2,STAU,IMP,HRB98DE,KRA,CG4612,FMR1,EIF4E1,VVL,CG8963,CASP,SIP3,EIF1,NTF-2,RHEB,EIF3K,SBP2,STING
GO:BP	response to stimulus	GO:0050896	0.259776	0.345781	8.60995e-05	4.065	ACC,XRP1,CV-C,SCYL,TEP4,CATHD,ATG1,UP,LETM1,DLG5,RASGAP1,SEV,CG8485,CDM,ALIX,MVL,HSF,INE,CV-2,MDR49,MTF-1,RHOGAP15B,CG9572,SDHC,PEX5,MGSTL,KRAKEN,SP7,CG17919,HSC70-1,GRIK,POLY,GADD45,CG11425,SPIRIT,SER,CG12866,VSG,OBP99C,MKP3,TOK,CG10433,COL4A1,SU(DX),GNMT,NUCB1,RAB11,CV-D,CG6330,SEC61ALPHA,TRX-2,RAB10,HYDR2,AKIRIN,FKBP14,EIF2BETA,USP8,TOM40,RAB6,LST,RABX1,CG12355,ZIP89B,BOMS1,FKBP39,PRX2540-2,NC…
GO:BP	rRNA metabolic process	GO:0016072	0.0165996	0.0456432	0.000109846	3.95922	SNP,RPS21,NNP-1,CG32344,CG8414,NOP56,CG1785,NCLB,CG12325,FIB,RBM13,RPLP0-LIKE,L(1)G0020,CG6712,RPS7,RPS28B,CG4364,CG3008,CG11417,FRG1,MRPS11,CG5645,CG5800,CG2972,CG7275,SAS10,CG11583,DBE,CG12301,RLB1,CG18178,CG1789,POP1
GO:BP	macromolecule localization	GO:0033036	0.0924959	0.150761	0.000152366	3.81711	CHC,CG31729,SWS,KLP98A,EGL,CDM,CG45076,SCPX,PEX5,FATP2,VHA16-1,SU(DX),RAB11,CV-D,SEC61ALPHA,CG13887,RAB10,GP210,CG11857,SURF4,KDELR,TOM40,U2AF50,RAB6,SEC22,SEC61BETA,P24-1,RABX1,BAI,NMD3,SEC61GAMMA,SRP9,SRP19,LOJ,GAMMASNAP1,MRPL18,RIM,14-3-3ZETA,COW,SGG,BSG,HRB27C,WDB,14-3-3EPSILON,SQD,RAB3,LSD-2,STAU,INAD,TRAL,IMP,CHIC,RAB5,DCP2,RANBPM,LAMP1,RHO1,DLIC,CKIIBETA,SYND,FLO2,RIP11,KAP-ALPHA3,ROK,SAR1…
GO:BP	symbiont entry into host cell	GO:0046718	0.00265252	0.0165975	0.000158048	3.80121	MVL,RAB11,SEC61ALPHA,RAB10,RAB3,RAB5,SAR1,RAB2,RAB7,SAU,RAB14,VPS29
GO:BP	biological process involved in interaction with host	GO:0051701	0.00265252	0.0165975	0.000158048	3.80121	MVL,RAB11,SEC61ALPHA,RAB10,RAB3,RAB5,SAR1,RAB2,RAB7,SAU,RAB14,VPS29
GO:BP	symbiont entry into host	GO:0044409	0.00265252	0.0165975	0.000158048	3.80121	MVL,RAB11,SEC61ALPHA,RAB10,RAB3,RAB5,SAR1,RAB2,RAB7,SAU,RAB14,VPS29
GO:BP	metabolic process	GO:0008152	0.527167	0.61964	0.000166406	3.77883	ACC,XRP1,ATPCL,CHC,PRAGE,INOS,CATHD,ATG1,USP32,SWS,SCCPDH1,KLP98A,UBI-P63E,SEV,EGL,AOX3,CG8485,CG9485,ALIX,HSF,GFAT1,CAH2,CG8839,CG7115,MTF-1,L(2)K01209,SNP,SDHC,CTPSYN,CG1441,SPG7,RPN9,CCT7,SP7,DIP-C,CG11200,HSC70-1,CG7724,CG6201,POLY,FATP2,CG11425,SPIRIT,CG4945,CG7560,CG10352,CG14892,CG2065,CG12866,UNC-4,GS2,ODA,EIF4G1,GLUT4EF,MNT,PAPLA1,MKP3,TOK,CNBP,GOL,VRI,SU(DX),GNMT,NUCB1,ROQ,ERF3,CG6330,S…
GO:BP	vesicle-mediated transport	GO:0016192	0.0503123	0.0954357	0.000178901	3.74739	CHC,CG9297,EMP,CG31729,KLP98A,ALIX,HSC70-1,PAPLA1,SU(DX),RAB11,CG3829,CG13887,RAB10,CG11857,ERGIC53,KDELR,RAB6,SEC22,P24-1,RABX1,BAI,LOJ,GAMMASNAP1,NORPA,RIM,NSYB,RUDHIRA,VMAT,RAB3,VAP33,RAB5,RHO1,SYND,RIP11,UBC6,FRQ2,SAR1,FMR1,RAP1,RAB2,CBL,RAB7,BSK,STAM,SAU,RHOGAP68F,SCAMP,CANB,CG9132,RAB14,VPS26,CDC42,SYX5,SNX3,ARL8,TM9SF4,HOOK,RAC1,CG30423,RABX4,YKT6,ZETACOP,CG14184,ATG6,BOCA,GB,VPS29,ARL1,CG…
GO:BP	cellular component organization or biogenesis	GO:0071840	0.286301	0.372061	0.000190726	3.71959	XRP1,CV-C,CHC,CG31729,ATG1,UP,SWS,RASGAP1,WUPA,TM2,EGL,CDM,ALIX,MLP60A,SNP,SPG7,PEX5,POLY,LBM,GS2,MNT,TOK,VRI,COL4A1,SU(DX),GNMT,RAB11,VKG,ERF3,RPS21,RAB10,GP210,SURF4,EIF3J,ERGIC53,EIF2BETA,VIG2,RAB6,RPL24-LIKE,SEC22,REEPB,P24-1,RABX1,BAI,NMD3,NNP-1,CG2199,CG32344,NO66,CG8414,ROBL,PFDN5,NOP56,CG1785,NCLB,CG12325,SRP19,FIB,LOJ,RBM13,CG15019,RPLP0-LIKE,L(1)G0020,NPH,CG6712,GAMMASNAP1,COMM2,CG7509,…
GO:BP	viral process	GO:0016032	0.00376487	0.0193638	0.000249169	3.60351	MVL,RAB11,SEC61ALPHA,RAB10,RAB3,RAB5,SAR1,RAB2,RAB7,SAU,RAB14,ELOB,VPS29,CBP20
GO:BP	cellular component biogenesis	GO:0044085	0.139129	0.206086	0.000253689	3.5957	CV-C,CHC,ATG1,UP,WUPA,TM2,EGL,ALIX,SNP,SPG7,LBM,GS2,GNMT,RAB11,RPS21,EIF3J,EIF2BETA,RAB6,RPL24-LIKE,NMD3,NNP-1,CG32344,CG8414,PFDN5,NOP56,CG1785,NCLB,CG12325,SRP19,FIB,RBM13,RPLP0-LIKE,L(1)G0020,NPH,CG6712,GAMMASNAP1,ATPALPHA,SH,CAM,MAMO,DYSC,SGG,BSG,HRB27C,MOB2,AGO1,WDB,SQD,HIS3.3B,CTP,ENS,RPS7,SLIK,WNK,ATX2,LSD-2,RPL6,STAU,VAP33,TRAL,IMP,CHIC,ATG8A,KRA,RPL14,SRPK,DCP2,RPS28B,RANBPM,MTS,RILPL,AT…
GO:BP	organic substance biosynthetic process	GO:1901576	0.304355	0.390041	0.000290779	3.53644	ACC,ATPCL,INOS,SCCPDH1,EGL,CG9485,HSF,GFAT1,MTF-1,L(2)K01209,SNP,CTPSYN,SPG7,CCT7,HSC70-1,CG7724,POLY,FATP2,SPIRIT,CG7560,CG12866,UNC-4,GS2,EIF4G1,GLUT4EF,MNT,PAPLA1,TOK,CNBP,VRI,GNMT,ROQ,ERF3,RPS21,HYDR2,AKIRIN,EIF3J,CG6870,EIF2BETA,NAA30A,EEF1DELTA,U2AF50,RPL24-LIKE,CG9911,CG11334,ADI1,ALG1,NNP-1,OSTGAMMA,CG7872,CG2199,SAMDC,CG32344,MRPL24,MRPL30,NO66,CG8414,PFDN5,NOP56,CG1785,NCLB,SRP9,CG12325…
GO:BP	viral life cycle	GO:0019058	0.00333704	0.0179806	0.000367529	3.43471	MVL,RAB11,SEC61ALPHA,RAB10,RAB3,RAB5,SAR1,RAB2,RAB7,SAU,RAB14,VPS29,CBP20
GO:BP	post-transcriptional regulation of gene expression	GO:0010608	0.0208779	0.0511757	0.000386538	3.41281	EGL,EIF4G1,CNBP,ROQ,RPS21,EIF3J,SRP9,DPH5,RBP6,PABP,HRB27C,BOL,AGO1,RM62,SQD,LARP4B,TYF,ATX2,STAU,IMP,SSX,HRB98DE,KRA,DCP2,CG4612,FMR1,EIF4E1,FBXO11,CG8963,SIP3,EIF1,RHEB,EIF3K,CG9705,CRIF,SBP2,CBP20
GO:BP	localization within membrane	GO:0051668	0.0191666	0.0484094	0.00038683	3.41248	SWS,RAB11,SEC61ALPHA,RAB10,SEC61BETA,SEC61GAMMA,SRP9,SRP19,BSG,RAB3,RHO1,FLO2,UBC6,SAR1,RAB2,RAB7,SAU,RHOGAP68F,RAB14,VPS26,CDC42,MGE,SNX3,TM9SF4,EMC7,SGT,TOM7,RABX4,EMC4,NMD,BOCA,ARL1,EMC5,SRP14,EMC6
GO:BP	regulation of transport	GO:0051049	0.0298622	0.0650069	0.000392004	3.40671	CHC,CG9336,MVL,SCPX,SU(DX),RAB11,SEC61ALPHA,RAB10,U2AF50,LST,REEPB,SH,CAM,NORPA,NSYB,DYSC,SGG,IH,QVR,HK,CG6329,RAB3,PORIN,WNK,LSD-2,FRQ1,TRAL,CNX99A,RAB5,RANBPM,SYND,FLO2,LEVY,FRQ2,SAR1,RAP1,CBL,RAB7,HOMER,RHOGAP68F,CDC42,TSR,SNX3,RABX4,CG14275,VPS29,ARL1
GO:BP	biosynthetic process	GO:0009058	0.306666	0.391425	0.00040237	3.39537	ACC,ATPCL,INOS,SCCPDH1,EGL,CG9485,HSF,GFAT1,MTF-1,L(2)K01209,SNP,CTPSYN,SPG7,CCT7,HSC70-1,CG7724,POLY,FATP2,SPIRIT,CG7560,CG12866,UNC-4,GS2,EIF4G1,GLUT4EF,MNT,PAPLA1,TOK,CNBP,VRI,GNMT,ROQ,ERF3,RPS21,HYDR2,AKIRIN,EIF3J,CG6870,EIF2BETA,NAA30A,EEF1DELTA,U2AF50,RPL24-LIKE,CG9911,CG11334,ADI1,ALG1,NNP-1,OSTGAMMA,CG7872,CG2199,SAMDC,CG32344,MRPL24,MRPL30,NO66,CG8414,PFDN5,NOP56,CG1785,NCLB,SRP9,CG12325…
GO:BP	cellular macromolecule localization	GO:0070727	0.0747839	0.125864	0.000473809	3.3244	CHC,SWS,KLP98A,EGL,CDM,CG45076,PEX5,SU(DX),RAB11,SEC61ALPHA,CG13887,RAB10,GP210,CG11857,SURF4,KDELR,TOM40,RAB6,SEC22,SEC61BETA,P24-1,RABX1,BAI,NMD3,SEC61GAMMA,SRP9,SRP19,LOJ,GAMMASNAP1,RIM,14-3-3ZETA,COW,SGG,BSG,HRB27C,14-3-3EPSILON,SQD,RAB3,STAU,INAD,TRAL,CHIC,RAB5,DCP2,RANBPM,LAMP1,RHO1,CKIIBETA,SYND,FLO2,RIP11,KAP-ALPHA3,ROK,SAR1,TBC,RAB2,NAUS,STAM,TANGO5,SAU,RAN,SCAMP,CG9132,RAB14,VPS26,CDC42…
GO:BP	transport	GO:0006810	0.172927	0.24343	0.00050759	3.29449	CHC,CG9297,EMP,CG31729,ATG1,LETM1,CG1607,KLP98A,EGL,CDM,ALIX,CG9336,MVL,INE,TMEM63,CG45076,RDOG,SCPX,DIC1,MDR49,CG8399,PEX5,CG4239,SUGB,HSC70-1,CG15279,GRIK,FATP2,AQP,CG12866,VHA16-1,GLUT4EF,PAPLA1,CG10960,SU(DX),RAB11,CV-D,MAPMODULIN,SEC61ALPHA,CG3829,CG13887,RAB10,GP210,CG11857,SURF4,ERGIC53,KDELR,TOM40,U2AF50,RAB6,SEC22,LST,REEPB,SEC61BETA,CG7272,P24-1,RABX1,BAI,NMD3,OSTGAMMA,SEC61GAMMA,ZIP89B…
GO:BP	cellular biosynthetic process	GO:0044249	0.300933	0.384509	0.000510809	3.29174	ACC,ATPCL,SCCPDH1,EGL,CG9485,HSF,GFAT1,MTF-1,L(2)K01209,SNP,CTPSYN,SPG7,CCT7,HSC70-1,POLY,FATP2,SPIRIT,CG7560,CG12866,UNC-4,GS2,EIF4G1,GLUT4EF,MNT,PAPLA1,TOK,CNBP,VRI,GNMT,ROQ,ERF3,RPS21,HYDR2,AKIRIN,EIF3J,EIF2BETA,NAA30A,EEF1DELTA,U2AF50,RPL24-LIKE,CG9911,CG11334,ADI1,ALG1,NNP-1,OSTGAMMA,CG7872,CG2199,SAMDC,CG32344,MRPL24,MRPL30,NO66,CG8414,PFDN5,NOP56,CG1785,NCLB,SRP9,CG12325,FIB,RBM13,RPLP0-LI…
GO:BP	regulation of cellular process	GO:0050794	0.344913	0.430152	0.000659403	3.18085	XRP1,CV-C,SCYL,CHC,ATG1,UP,SWS,DLG5,RASGAP1,TM2,SEV,EGL,CG8485,CDM,ALIX,CG9336,MVL,HSF,CV-2,SCPX,MTF-1,RHOGAP15B,CG9572,SP7,GRIK,POLY,GADD45,CG11425,SER,UNC-4,EIF4G1,VSG,GLUT4EF,MNT,MKP3,TOK,CNBP,VRI,COL4A1,SU(DX),RAB11,CV-D,ROQ,SEC61ALPHA,RPS21,RAB10,HYDR2,AKIRIN,EIF3J,FKBP14,USP8,U2AF50,RAB6,CG6805,LST,REEPB,SEC61BETA,RABX1,CG2199,SEC61GAMMA,FKBP39,NO66,PFDN5,NCLB,SRP9,CG9922,RPLP0-LIKE,DPH5,DM…
GO:BP	biological process involved in symbiotic interaction	GO:0044403	0.00299478	0.0165975	0.00074257	3.12926	MVL,RAB11,SEC61ALPHA,RAB10,RAB3,RAB5,SAR1,RAB2,RAB7,SAU,RAB14,VPS29
GO:BP	nitrogen compound transport	GO:0071705	0.0595533	0.105118	0.000761796	3.11816	CHC,CG1607,EGL,CDM,CG45076,PEX5,CG15279,VHA16-1,SU(DX),RAB11,SEC61ALPHA,CG13887,RAB10,GP210,SURF4,KDELR,TOM40,U2AF50,RAB6,SEC22,LST,SEC61BETA,P24-1,RABX1,BAI,NMD3,SEC61GAMMA,LOJ,GAMMASNAP1,MRPL18,RIM,SGG,IH,SQD,VMAT,RAB3,PATH,TRAL,IMP,RAB5,RANBPM,DLIC,FLO2,RIP11,KAP-ALPHA3,SAR1,FMR1,TBC,RAB2,RAB7,STAM,TANGO5,SAU,RAN,SCAMP,CG9132,RAB14,VPS26,TSR,MGE,SYX5,SNX3,ARL8,NTF-2,CG8206,TOM7,RABX4,ZETACOP,C…
GO:BP	macromolecule biosynthetic process	GO:0009059	0.258749	0.337483	0.000822325	3.08496	EGL,CG9485,HSF,GFAT1,MTF-1,SNP,SPG7,CCT7,HSC70-1,POLY,SPIRIT,UNC-4,EIF4G1,GLUT4EF,MNT,PAPLA1,TOK,CNBP,VRI,ROQ,ERF3,RPS21,AKIRIN,EIF3J,EIF2BETA,NAA30A,EEF1DELTA,U2AF50,RPL24-LIKE,CG9911,ALG1,NNP-1,OSTGAMMA,CG7872,CG2199,CG32344,MRPL24,MRPL30,NO66,CG8414,PFDN5,NOP56,CG1785,NCLB,SRP9,CG12325,FIB,RBM13,RPLP0-LIKE,DPH5,MRPL19,L(1)G0020,CG6712,MRPL18,DMRT99B,PS,RBP6,LOLA,MAMO,14-3-3ZETA,PABP,PDP1,HRB27…
GO:BP	localization	GO:0051179	0.208094	0.280775	0.00110882	2.95514	CV-C,CHC,CG9297,EMP,CG31729,ATG1,SWS,LETM1,CG1607,KLP98A,EGL,CDM,ALIX,CG9336,MVL,INE,TMEM63,CG45076,RDOG,SCPX,DIC1,MDR49,CG8399,PEX5,CG4239,SUGB,HSC70-1,CG15279,GRIK,FATP2,AQP,CG12866,VHA16-1,GLUT4EF,PAPLA1,CG10960,SU(DX),RAB11,CV-D,MAPMODULIN,SEC61ALPHA,CG3829,CG13887,RAB10,GP210,CG11857,SURF4,ERGIC53,KDELR,TOM40,U2AF50,RAB6,SEC22,LST,REEPB,SEC61BETA,CG7272,P24-1,RABX1,BAI,NMD3,OSTGAMMA,SEC61GAM…
GO:BP	protein localization	GO:0008104	0.070848	0.118949	0.00113488	2.94505	CHC,SWS,KLP98A,CDM,CG45076,PEX5,SU(DX),RAB11,SEC61ALPHA,CG13887,RAB10,GP210,CG11857,SURF4,KDELR,TOM40,RAB6,SEC22,SEC61BETA,P24-1,RABX1,BAI,NMD3,SEC61GAMMA,SRP9,SRP19,LOJ,GAMMASNAP1,RIM,14-3-3ZETA,COW,SGG,BSG,14-3-3EPSILON,RAB3,STAU,INAD,TRAL,CHIC,RAB5,RANBPM,LAMP1,RHO1,SYND,FLO2,RIP11,KAP-ALPHA3,ROK,SAR1,TBC,RAB2,NAUS,STAM,TANGO5,SAU,RAN,SCAMP,CG9132,RAB14,VPS26,CDC42,TSR,MGE,SYX5,SNX3,ARL8,TM9SF…
GO:BP	rhabdomere development	GO:0042052	0.00376487	0.0179806	0.00176043	2.75438	RAB11,NINAE,CAM,DYSC,MOB2,SLIK,TAU,CPN,SYND,RIP11,OC,TSR,RAC1
GO:BP	response to external stimulus	GO:0009605	0.0770942	0.125864	0.00179403	2.74617	TEP4,CATHD,ATG1,CDM,HSF,SP7,CG17919,POLY,SPIRIT,CG12866,OBP99C,GNMT,NUCB1,CG6330,SEC61ALPHA,TRX-2,AKIRIN,RAB6,LST,BOMS1,CG6429,NINAE,ATPALPHA,SH,GGAMMA30A,CAM,SHEP,NORPA,LOLA,RDL,NRV3,SGG,IH,RM62,RUDHIRA,DOPECR,GDAP2,CG18067,PORIN,TYF,FER2LCH,INAD,VAP33,IMP,CHIC,SSX,CG30389,ATG8A,EFF,ATG17,RHO1,RH6,FLO2,CRTC,APS,FON,FMR1,BOMS2,VVL,BOMS3,LAZA,BSK,HRB87F,RAB14,SKPA,CASP,CDC42,ENDOS,HDC,TM9SF4,RAC1,…
GO:BP	organic substance transport	GO:0071702	0.0760674	0.124481	0.00186593	2.72911	CHC,CG31729,CG1607,EGL,CDM,CG45076,SCPX,DIC1,PEX5,CG15279,FATP2,CG12866,VHA16-1,GLUT4EF,CG10960,SU(DX),RAB11,CV-D,SEC61ALPHA,CG13887,RAB10,GP210,SURF4,KDELR,TOM40,U2AF50,RAB6,SEC22,LST,SEC61BETA,CG7272,P24-1,RABX1,BAI,NMD3,SEC61GAMMA,LOJ,GAMMASNAP1,MRPL18,RIM,SGG,IH,SQD,VMAT,RAB3,LSD-2,PATH,TRAL,IMP,RAB5,RANBPM,DLIC,FLO2,RIP11,KAP-ALPHA3,SAR1,FMR1,TBC,RAB2,RAB7,STAM,TANGO5,SAU,RAN,SCAMP,MTP,CG913…
GO:BP	cell communication	GO:0007154	0.173697	0.237898	0.00427174	2.3694	CV-C,SCYL,CHC,ATG1,UP,LETM1,DLG5,RASGAP1,SEV,CG8485,CDM,ALIX,CG9336,INE,CV-2,RHOGAP15B,CG9572,GRIK,POLY,GADD45,CG11425,SER,MKP3,TOK,COL4A1,SU(DX),GNMT,RAB11,CV-D,RAB10,HYDR2,AKIRIN,FKBP14,USP8,RAB6,SEC22,LST,P24-1,RABX1,BAI,FKBP39,GAMMASNAP1,NINAE,ATPALPHA,SH,GGAMMA30A,CAM,LK6,NORPA,RIM,LOLA,RDL,14-3-3ZETA,SAP47,PABP,NPLP2,NSYB,DYSC,COW,SGG,IH,MOB2,QVR,WDB,14-3-3EPSILON,TLK,CG45050,CANA-14F,CG632…
GO:BP	compound eye photoreceptor cell differentiation	GO:0001751	0.017712	0.0428769	0.00453324	2.34359	RASGAP1,SEV,SU(DX),RAB11,RAB6,NINAE,CAM,LOLA,14-3-3ZETA,PABP,DYSC,MOB2,14-3-3EPSILON,SLIK,ATX2,TAU,EFF,MTS,CPN,SYND,RIP11,ALPH,RAP1,OC,CBL,TSR,TGO,HR3,RAC1,SALM,CKA
GO:BP	protein localization to membrane	GO:0072657	0.0160862	0.0401107	0.00510883	2.29168	SWS,RAB11,SEC61ALPHA,RAB10,SEC61BETA,SEC61GAMMA,SRP9,SRP19,BSG,RAB3,FLO2,SAR1,RAB2,SAU,VPS26,CDC42,MGE,TM9SF4,EMC7,SGT,TOM7,RABX4,EMC4,NMD,BOCA,ARL1,EMC5,SRP14,EMC6
GO:BP	cell maturation	GO:0048469	0.0160862	0.0401107	0.00510883	2.29168	CHC,EGL,POLY,RAB11,HYDR2,USP8,RAB6,BAI,SHEP,RIM,14-3-3ZETA,HRB27C,14-3-3EPSILON,SQD,CTP,FLW,STAU,IMP,CHIC,DCP2,EFF,CKIIBETA,ROK,FMR1,BSK,STAM,SKPA,PC,ATG6
GO:BP	biological process involved in interspecies interaction between organisms	GO:0044419	0.0468041	0.0843707	0.00529161	2.27641	TEP4,CATHD,MVL,HSF,SP7,CG17919,POLY,SPIRIT,CG12866,OBP99C,NUCB1,RAB11,SEC61ALPHA,TRX-2,RAB10,AKIRIN,RAB6,BOMS1,CG6429,LOLA,RM62,CG18067,RAB3,TYF,FER2LCH,VAP33,SSX,RAB5,EFF,RHO1,FLO2,FON,SAR1,BOMS2,VVL,BOMS3,RAB2,RAB7,BSK,SAU,RAB14,SKPA,CASP,CDC42,TM9SF4,RAC1,NTF-2,CG10333,UBC4,GNBP2,PCMT,UBCE2M,CRIF,ATG6,MED6,GB,VPS29,PDCD-5,CG46338,STING,CG13994
GO:BP	positive regulation of monoatomic ion transmembrane transport	GO:0034767	0.00299478	0.0152144	0.00580125	2.23648	CG9336,MVL,SEC61ALPHA,CAM,DYSC,QVR,HK,CG6329,WNK,LEVY,CG14275
GO:BP	organonitrogen compound metabolic process	GO:1901564	0.268931	0.341632	0.00599236	2.2224	ACC,ATPCL,CATHD,ATG1,USP32,SWS,UBI-P63E,SEV,EGL,CG8485,ALIX,GFAT1,CG7115,L(2)K01209,CTPSYN,CG1441,SPG7,RPN9,CCT7,SP7,DIP-C,HSC70-1,CG6201,SPIRIT,CG4945,CG7560,CG10352,CG14892,CG12866,GS2,ODA,EIF4G1,PAPLA1,MKP3,TOK,CNBP,GOL,SU(DX),GNMT,ROQ,ERF3,CG6330,RPS21,EIF3J,EIF2BETA,USP8,NAA30A,EEF1DELTA,RPL24-LIKE,CG9911,GSTE3,CG11334,ADI1,ALG1,RABX1,CG11811,OSTGAMMA,CG7872,SAMDC,CG2681,MRPL24,MRPL30,PFDN5,…
GO:BP	protein transport	GO:0015031	0.0419269	0.077455	0.00633051	2.19856	CHC,CDM,CG45076,PEX5,SU(DX),RAB11,SEC61ALPHA,CG13887,RAB10,GP210,SURF4,KDELR,TOM40,RAB6,SEC22,SEC61BETA,P24-1,RABX1,BAI,NMD3,SEC61GAMMA,LOJ,GAMMASNAP1,RIM,SGG,RAB3,TRAL,RAB5,RANBPM,FLO2,RIP11,KAP-ALPHA3,SAR1,TBC,RAB2,STAM,TANGO5,SAU,RAN,SCAMP,CG9132,RAB14,VPS26,TSR,MGE,SYX5,SNX3,ARL8,NTF-2,CG8206,TOM7,RABX4,ZETACOP,ATG6,VPS29,ARL1
GO:BP	anatomical structure maturation	GO:0071695	0.0163429	0.0401107	0.00703208	2.15292	CHC,EGL,POLY,RAB11,HYDR2,USP8,RAB6,BAI,SHEP,RIM,14-3-3ZETA,HRB27C,14-3-3EPSILON,SQD,CTP,FLW,STAU,IMP,CHIC,DCP2,EFF,CKIIBETA,ROK,FMR1,BSK,STAM,SKPA,PC,ATG6
GO:BP	eye photoreceptor cell differentiation	GO:0001754	0.0181398	0.0428769	0.0074947	2.12525	RASGAP1,SEV,SU(DX),RAB11,RAB6,NINAE,CAM,LOLA,14-3-3ZETA,PABP,DYSC,MOB2,14-3-3EPSILON,SLIK,ATX2,TAU,EFF,MTS,CPN,SYND,RIP11,ALPH,RAP1,OC,CBL,TSR,TGO,HR3,RAC1,SALM,CKA
GO:BP	signaling	GO:0023052	0.169162	0.230982	0.00751204	2.12424	CV-C,SCYL,CHC,ATG1,UP,LETM1,DLG5,RASGAP1,SEV,CG8485,CDM,ALIX,CG9336,CV-2,RHOGAP15B,CG9572,GRIK,POLY,GADD45,CG11425,SER,MKP3,TOK,COL4A1,SU(DX),RAB11,CV-D,RAB10,HYDR2,AKIRIN,FKBP14,USP8,RAB6,SEC22,LST,P24-1,RABX1,BAI,FKBP39,GAMMASNAP1,NINAE,ATPALPHA,SH,GGAMMA30A,CAM,LK6,NORPA,RIM,LOLA,RDL,14-3-3ZETA,SAP47,PABP,NPLP2,NSYB,DYSC,COW,SGG,IH,MOB2,QVR,WDB,14-3-3EPSILON,TLK,CG45050,CANA-14F,CG6329,DOPECR,…
GO:BP	protein localization to endoplasmic reticulum	GO:0070972	0.00308035	0.0152144	0.00789106	2.10286	SEC61ALPHA,CG13887,CG11857,KDELR,SEC61BETA,SEC61GAMMA,SRP9,SRP19,SGT,SPASE22-23,SRP14
GO:BP	positive regulation of transmembrane transport	GO:0034764	0.00308035	0.0152144	0.00789106	2.10286	CG9336,MVL,SEC61ALPHA,CAM,DYSC,QVR,HK,CG6329,WNK,LEVY,CG14275
GO:BP	regulation of behavior	GO:0050795	0.00915547	0.0276625	0.00870864	2.06005	CG9336,GADD45,SH,RDL,IH,QVR,AGO1,HK,CG6329,ATX2,RHO1,FMR1,GALPHAS,HOMER,NCA,RAC1,ASTC,BTBD9,TMC,CG14275
GO:BP	cytoplasmic translation	GO:0002181	0.0123214	0.033195	0.00886599	2.05227	CNBP,RPS21,EIF3J,EIF2BETA,RPL24-LIKE,RPLP0-LIKE,RPS7,RPS29,RPL6,RPS23,RPL14,RPL28,RPS28B,RPS11,RPL12,RPL9,RPS27,RPS13,EIF4H1,RPS20,EIF3H,EIF3G1,EIF1,EIF3K
GO:BP	regulation of localization	GO:0032879	0.0405579	0.0746888	0.0102586	1.98891	CHC,CG9336,MVL,SCPX,SU(DX),RAB11,SEC61ALPHA,RAB10,U2AF50,LST,REEPB,SH,CAM,NORPA,NSYB,DYSC,SGG,IH,QVR,WDB,HK,CG6329,RAB3,PORIN,SLIK,WNK,LSD-2,STAU,FRQ1,TRAL,CNX99A,RAB5,RANBPM,SYND,FLO2,LEVY,FRQ2,SAR1,RAP1,RAB2,CBL,RAB7,HOMER,RAN,RHOGAP68F,CDC42,TSR,SNX3,TOM7,RABX4,ZETACOP,CG14275,VPS29,ARL1
GO:BP	positive regulation of monoatomic ion transport	GO:0043270	0.00316591	0.0152144	0.0106078	1.97437	CG9336,MVL,SEC61ALPHA,CAM,DYSC,QVR,HK,CG6329,WNK,LEVY,CG14275
GO:BP	cell-cell signaling	GO:0007267	0.0448361	0.0802213	0.0114988	1.93935	CV-C,CHC,ATG1,LETM1,CDM,CG9336,GRIK,USP8,SEC22,LST,P24-1,BAI,GAMMASNAP1,ATPALPHA,SH,RIM,RDL,SAP47,PABP,NSYB,DYSC,COW,SGG,IH,QVR,CG6329,DOPECR,FLW,RAB3,WNK,FRQ1,VAP33,CKIALPHA,MTS,SSDP,RHO1,PP1-87B,CKIIBETA,FLO2,FRQ2,FMR1,SOXN,RAP1,EIF4E1,GALPHAS,SCAMP,CANB,SKPA,VPS26,CDC42,SNX3,ARL8,BTBD9,MANF,CG14275,BOCA,ARL1,OBP56H
GO:BP	positive regulation of transport	GO:0051050	0.0142038	0.0359613	0.0119817	1.92148	CHC,CG9336,MVL,SCPX,SU(DX),RAB11,SEC61ALPHA,U2AF50,CAM,NORPA,NSYB,DYSC,QVR,HK,CG6329,WNK,TRAL,RANBPM,FLO2,LEVY,SAR1,CBL,RAB7,TSR,SNX3,CG14275
GO:BP	signal release	GO:0023061	0.0117224	0.0318119	0.0120775	1.91802	CHC,LETM1,SEC22,LST,P24-1,BAI,GAMMASNAP1,RIM,NSYB,IH,RAB3,FRQ1,VAP33,FLO2,FRQ2,RAP1,SCAMP,CANB,CDC42,SNX3,ARL8,ARL1,OBP56H
GO:BP	cortical actin cytoskeleton organization	GO:0030866	0.00504834	0.0193638	0.0121022	1.91713	CV-C,RAB11,FLW,SLIK,CHIC,DCP2,RHO1,ROK,SAU,CDC42,TSR,ABI,RAC1,GHI
GO:BP	regulation of cell communication	GO:0010646	0.0819714	0.127248	0.0128064	1.89257	CV-C,SCYL,ATG1,DLG5,RASGAP1,CDM,ALIX,CG9336,CV-2,CG9572,GRIK,POLY,MKP3,TOK,SU(DX),CV-D,AKIRIN,FKBP14,USP8,LST,SH,CAM,NORPA,RIM,LOLA,RDL,14-3-3ZETA,SAP47,DYSC,COW,SGG,IH,QVR,WDB,14-3-3EPSILON,CG45050,CG6329,DOPECR,FLW,RAB3,WNK,FRQ1,INAD,CKIALPHA,IMP,CNOT4,EFF,MTS,SSDP,RHO1,MNN1,KEK1,PP1-87B,LTL,CG7378,WCY,FLO2,UBC6,CG2918,ALPH,FRQ2,FMR1,SOXN,RAP1,EIF4E1,CBL,CG10508,CG5522,BSK,EIF3H,ELOB,SKPA,VPS26…
GO:BP	compound eye morphogenesis	GO:0001745	0.0270386	0.055325	0.0136563	1.86467	CHC,RASGAP1,SEV,SU(DX),RAB11,RAB6,NINAE,CAM,NORPA,LOLA,14-3-3ZETA,PABP,DYSC,MOB2,14-3-3EPSILON,SLIK,ATX2,TAU,HRB98DE,EFF,MTS,RHO1,CPN,SD,MLF,SYND,RIP11,ALPH,ROK,RAP1,OC,CBL,HRB87F,CDC42,TSR,TGO,HR3,RAC1,SALM,CKA
GO:BP	regulation of monoatomic cation transmembrane transport	GO:1904062	0.00385043	0.0165975	0.0144244	1.8409	CG9336,MVL,SEC61ALPHA,CAM,QVR,HK,CG6329,PORIN,WNK,CNX99A,LEVY,CG14275
GO:BP	rhythmic process	GO:0048511	0.0143749	0.0359613	0.0149217	1.82618	CG9336,REG-5,VRI,SH,NORPA,RDL,PDP1,DYSC,SGG,IH,QVR,HK,CG6329,CG5273,TYF,ATX2,RHO1,RH6,CKIIBETA,FMR1,HOMER,DH44,NCA,RAC1,BTBD9,CG14275
GO:BP	regulation of catabolic process	GO:0009894	0.0261829	0.0539419	0.0149469	1.82545	CHC,ATG1,ODA,ROQ,SEC61ALPHA,USP8,SEC61BETA,RABX1,SEC61GAMMA,FKBP39,SGG,BOL,AGO1,LSD-2,CKIALPHA,ATG8A,DCP2,RANBPM,ACN,WCY,UBC6,CG8405,FMR1,ARI-1,UBCE2H,BSK,EIF3H,ELOB,SKPA,SIP3,SCHLANK,RHEB,RAGC-D,REG,STUB1,CG9705,WDS,STING,RPT6
GO:BP	circadian behavior	GO:0048512	0.0102678	0.0290456	0.0150909	1.82129	CG9336,VRI,SH,RDL,DYSC,SGG,IH,QVR,HK,CG6329,TYF,ATX2,RHO1,CKIIBETA,FMR1,HOMER,DH44,NCA,RAC1,BTBD9,CG14275
GO:BP	rhythmic behavior	GO:0007622	0.0103534	0.0290456	0.01722	1.76397	CG9336,VRI,SH,RDL,DYSC,SGG,IH,QVR,HK,CG6329,TYF,ATX2,RHO1,CKIIBETA,FMR1,HOMER,DH44,NCA,RAC1,BTBD9,CG14275
GO:BP	regulation of protein phosphorylation	GO:0001932	0.00804312	0.0248963	0.0174692	1.75773	SWS,LK6,SGG,MOB2,WDB,SLIK,MTS,ATG17,RHO1,KEK1,ROK,CBL,CDC42,ABI,RAC1,CCM3,CKA,MAT1
GO:BP	regulation of response to stimulus	GO:0048583	0.0883032	0.134163	0.0175525	1.75566	CV-C,SCYL,ATG1,DLG5,RASGAP1,ALIX,INE,CV-2,CG9572,SP7,POLY,MKP3,TOK,SU(DX),CV-D,AKIRIN,FKBP14,USP8,LST,CAM,NORPA,LOLA,RDL,14-3-3ZETA,COW,SGG,QVR,AGO1,WDB,14-3-3EPSILON,RM62,CG45050,DOPECR,FLW,WNK,ATX2,INAD,CKIALPHA,IMP,CHIC,CNOT4,EFF,MTS,SSDP,RHO1,MNN1,KEK1,PP1-87B,LTL,CG7378,WCY,FLO2,UBC6,CG2918,CG8405,ALPH,ROK,FMR1,SOXN,RAP1,VVL,CBL,DEAF1,CG10508,CG5522,BSK,EIF3H,ELOB,SKPA,VPS26,CASP,CDC42,NCA,S…
GO:BP	regulation of signaling	GO:0023051	0.0815436	0.125864	0.0180043	1.74462	CV-C,SCYL,ATG1,DLG5,RASGAP1,CDM,ALIX,CG9336,CV-2,CG9572,GRIK,POLY,MKP3,TOK,SU(DX),CV-D,AKIRIN,FKBP14,USP8,LST,SH,CAM,NORPA,RIM,LOLA,RDL,14-3-3ZETA,SAP47,DYSC,COW,SGG,IH,QVR,WDB,14-3-3EPSILON,CG45050,CG6329,DOPECR,FLW,RAB3,WNK,FRQ1,INAD,CKIALPHA,IMP,CNOT4,EFF,MTS,SSDP,RHO1,MNN1,KEK1,PP1-87B,LTL,CG7378,WCY,FLO2,UBC6,CG2918,ALPH,FRQ2,FMR1,SOXN,RAP1,EIF4E1,CBL,CG10508,CG5522,EIF3H,ELOB,SKPA,VPS26,CAS…
GO:BP	pattern specification process	GO:0007389	0.0444939	0.0788382	0.0183363	1.73669	CHC,RASGAP1,EGL,CV-2,POLY,MKP3,TOK,SU(DX),RAB11,CV-D,RAB6,BAI,GAMMASNAP1,14-3-3ZETA,PABP,COW,SGG,HRB27C,AGO1,14-3-3EPSILON,SQD,CG45050,FLW,CORTO,STAU,TRAL,CHIC,DCP2,MTS,SSDP,RHO1,LTL,CKIIBETA,CG8405,ROK,SAR1,FMR1,SOXN,RAP1,VVL,OC,CBL,RAB7,BSK,LOLAL,DP,ELOB,CDC42,TSR,DMPD,TGO,RAC1,PC,PSC,SALM,NMD,CG8149
GO:BP	protein metabolic process	GO:0019538	0.216651	0.280775	0.0186264	1.72987	CATHD,ATG1,USP32,SWS,UBI-P63E,SEV,EGL,CG8485,ALIX,GFAT1,CG7115,SPG7,RPN9,CCT7,SP7,DIP-C,HSC70-1,SPIRIT,CG4945,CG10352,CG14892,ODA,EIF4G1,PAPLA1,MKP3,TOK,CNBP,GOL,SU(DX),ROQ,ERF3,RPS21,EIF3J,EIF2BETA,USP8,NAA30A,EEF1DELTA,RPL24-LIKE,CG9911,ALG1,RABX1,OSTGAMMA,CG7872,CG2681,MRPL24,MRPL30,PFDN5,SRP9,RPLP0-LIKE,DPH5,MRPL19,MRPL18,CAM,RBP6,LK6,14-3-3ZETA,PABP,DYSC,SGG,HRB27C,BOL,MOB2,MURA,EEF1ALPHA2,A…
GO:BP	photoreceptor cell differentiation	GO:0046530	0.0200222	0.04426	0.0217934	1.66167	RASGAP1,SEV,SU(DX),RAB11,RAB6,NINAE,CAM,LOLA,14-3-3ZETA,PABP,DYSC,BSG,MOB2,14-3-3EPSILON,SLIK,ATX2,TAU,EFF,MTS,CPN,SYND,RIP11,ALPH,RAP1,OC,CBL,TSR,TGO,HR3,RAC1,SALM,CKA
GO:BP	cortical cytoskeleton organization	GO:0030865	0.00598956	0.0207469	0.0221032	1.65554	CV-C,RAB11,FLW,RAB3,SLIK,CHIC,DCP2,RHO1,ROK,SAU,CDC42,TSR,ABI,RAC1,GHI
GO:BP	regulation of monoatomic ion transmembrane transport	GO:0034765	0.00530504	0.0193638	0.0222565	1.65254	CG9336,MVL,SEC61ALPHA,SH,CAM,DYSC,QVR,HK,CG6329,PORIN,WNK,CNX99A,LEVY,CG14275
GO:BP	habituation	GO:0046959	0.000941217	0.00829876	0.0225518	1.64682	SGG,AGO1,DOPECR,ATX2,WCY,FMR1
GO:BP	cellular nitrogen compound metabolic process	GO:0034641	0.259605	0.326418	0.0242313	1.61562	ACC,XRP1,ATPCL,PRAGE,EGL,HSF,GFAT1,MTF-1,L(2)K01209,SNP,CTPSYN,CG1441,POLY,CG12866,UNC-4,EIF4G1,GLUT4EF,MNT,CNBP,VRI,GNMT,ROQ,ERF3,CG6330,RPS21,AKIRIN,EIF3J,EIF2BETA,EEF1DELTA,U2AF50,RPL24-LIKE,NNP-1,CG11811,CG2199,SAMDC,CG32344,MRPL24,MRPL30,NO66,CG8414,PFDN5,NOP56,CG1785,NCLB,SRP9,CG12325,CG8303,FIB,RBM13,RPLP0-LIKE,DPH5,MRPL19,L(1)G0020,CG6712,MRPL18,DMRT99B,AOX1,PS,RBP6,LOLA,MAMO,14-3-3ZETA,P…
GO:BP	RNA processing	GO:0006396	0.0588688	0.0968188	0.0250662	1.60091	SNP,POLY,RPS21,U2AF50,NNP-1,CG32344,CG8414,NOP56,CG1785,NCLB,CG12325,FIB,RBM13,RPLP0-LIKE,L(1)G0020,CG6712,PS,PABP,HRB27C,AGO1,RM62,SQD,RBP1-LIKE,RPS7,TRAL,IMP,SSX,HRB98DE,SRPK,RPS28B,ACN,TRF4-1,FMR1,HRG,CG3198,CG4364,HRB87F,QKR58E-1,NCM,CG3008,CG5316,CG10333,CG17454,SALM,REG,FIP1,SF3B6,CRIF,CG11417,CG13625,FRG1,CG18428,MRPS11,CG3335,CG5645,CG5800,CG2972,CG7275,ELP2,SAS10,CG11583,CBP20,DBE,CG1230…
GO:BP	regulation of transmembrane transport	GO:0034762	0.0053906	0.0193638	0.0270119	1.56845	CG9336,MVL,SEC61ALPHA,SH,CAM,DYSC,QVR,HK,CG6329,PORIN,WNK,CNX99A,LEVY,CG14275
GO:BP	animal organ development	GO:0048513	0.101994	0.149378	0.0273641	1.56282	CV-C,CHC,UP,RASGAP1,WUPA,TM2,SEV,EGL,CV-2,MLP60A,RHOGAP15B,CTPSYN,MKP3,TOK,CNBP,VRI,COL4A1,SU(DX),RAB11,VKG,CV-D,RPS21,AKIRIN,FKBP14,USP8,RAB6,ROBL,NCLB,GAMMASNAP1,NINAE,ATPALPHA,CAM,NORPA,LOLA,14-3-3ZETA,PABP,DYSC,COW,SGG,MOB2,14-3-3EPSILON,CTP,FLW,IDGF4,SLIK,CORTO,WNK,ATX2,TAU,CYCT,CHIC,HRB98DE,CG,RAB5,EFF,MTS,RHO1,CPN,MNN1,VRP1,LTL,SD,MLF,CKIIBETA,SYND,AMUN,RIP11,UBC6,CG8405,ALPH,ROK,SAR1,FMR1…
GO:BP	positive regulation of circadian sleep/wake cycle, sleep	GO:0045938	0.00136904	0.00968188	0.0273757	1.56264	SH,IH,QVR,HK,HOMER,NCA,BTBD9
GO:BP	sensory organ morphogenesis	GO:0090596	0.0278942	0.055325	0.0285001	1.54515	CHC,RASGAP1,SEV,SU(DX),RAB11,RAB6,NINAE,CAM,NORPA,LOLA,14-3-3ZETA,PABP,DYSC,MOB2,14-3-3EPSILON,SLIK,ATX2,TAU,HRB98DE,EFF,MTS,RHO1,CPN,SD,MLF,SYND,RIP11,ALPH,ROK,RAP1,OC,CBL,HRB87F,CDC42,TSR,TGO,HR3,RAC1,SALM,CKA
GO:BP	eye morphogenesis	GO:0048592	0.0278942	0.055325	0.0285001	1.54515	CHC,RASGAP1,SEV,SU(DX),RAB11,RAB6,NINAE,CAM,NORPA,LOLA,14-3-3ZETA,PABP,DYSC,MOB2,14-3-3EPSILON,SLIK,ATX2,TAU,HRB98DE,EFF,MTS,RHO1,CPN,SD,MLF,SYND,RIP11,ALPH,ROK,RAP1,OC,CBL,HRB87F,CDC42,TSR,TGO,HR3,RAC1,SALM,CKA
GO:BP	developmental maturation	GO:0021700	0.0194233	0.0428769	0.0301506	1.5207	CHC,EGL,POLY,RAB11,HYDR2,USP8,RAB6,BAI,SHEP,RIM,14-3-3ZETA,HRB27C,14-3-3EPSILON,SQD,CTP,FLW,STAU,VAP33,IMP,CHIC,DCP2,EFF,CKIIBETA,ROK,FMR1,BSK,STAM,SKPA,PC,CG14274,ATG6
GO:BP	circadian rhythm	GO:0007623	0.0141183	0.0345781	0.0315638	1.50081	CG9336,VRI,SH,NORPA,RDL,PDP1,DYSC,SGG,IH,QVR,HK,CG6329,CG5273,TYF,ATX2,RHO1,RH6,CKIIBETA,FMR1,HOMER,DH44,NCA,RAC1,BTBD9,CG14275
GO:BP	compound eye photoreceptor development	GO:0042051	0.00838539	0.0248963	0.0315986	1.50033	SU(DX),RAB11,RAB6,NINAE,CAM,LOLA,PABP,DYSC,MOB2,SLIK,ATX2,TAU,CPN,SYND,RIP11,OC,TSR,RAC1
GO:BP	cellular response to organonitrogen compound	GO:0071417	0.0116369	0.0304288	0.0340386	1.46803	POLY,MKP3,RAB10,NCLB,SH,SGG,WDB,DOPECR,MTS,PP1-87B,CRTC,FMR1,RAP1,GALPHAS,SKPA,TGO,RHEB,RAGC-D,STUB1,RABX4,CG14184,PEPCK2
GO:BP	positive regulation of translation	GO:0045727	0.00419269	0.0165975	0.0368125	1.43401	CNBP,DPH5,PABP,HRB27C,BOL,LARP4B,TYF,HRB98DE,CG4612,FMR1,CG8963,RHEB
GO:BP	endoplasmic reticulum organization	GO:0007029	0.00419269	0.0165975	0.0368125	1.43401	ERGIC53,REEPB,BSG,VAP33,TRAL,SAR1,ARI-1,EMC7,EMC4,ARL1,EMC5,EMC6
GO:BP	positive regulation of protein phosphorylation	GO:0001934	0.00359374	0.0152144	0.0399616	1.39836	LK6,MOB2,SLIK,ATG17,RHO1,CDC42,ABI,RAC1,CCM3,CKA,MAT1
GO:BP	cellular response to oxygen-containing compound	GO:1901701	0.0178831	0.0401107	0.0405047	1.39249	ACC,POLY,MKP3,RAB10,LST,CG12355,NCLB,SH,GGAMMA30A,CAM,SGG,WDB,DOPECR,MTS,PP1-87B,CRTC,FMR1,RAP1,GALPHAS,BSK,SKPA,TGO,RHEB,SIRUP,RAGC-D,STUB1,RABX4,CG14184,PEPCK2
GO:BP	intracellular signaling cassette	GO:0141124	0.0363652	0.06639	0.0407234	1.39016	CV-C,UP,ALIX,GADD45,MKP3,RAB11,RAB10,RAB6,LST,RABX1,CAM,NORPA,14-3-3ZETA,SGG,WDB,14-3-3EPSILON,CANA-14F,DOPECR,FLW,RAB3,RAB5,MTS,RHO1,MNN1,PP1-87B,CG7378,UBC6,ALPH,ROK,RAP1,RAB2,CBL,RAB7,CG5522,BSK,RHOGAP68F,CANB,RAB14,SKPA,CDC42,RAC1,RHEB,RAP2L,CCM3,RABX4,CKA,CG14184,RHOGAP5A
GO:BP	small GTPase-mediated signal transduction	GO:0007264	0.0152306	0.0359613	0.0419919	1.37683	CV-C,RAB11,RAB10,RAB6,RABX1,14-3-3ZETA,14-3-3EPSILON,RAB3,RAB5,RHO1,PP1-87B,ALPH,ROK,RAP1,RAB2,RAB7,CG5522,RHOGAP68F,RAB14,CDC42,RAC1,RHEB,RAP2L,RABX4,CKA,RHOGAP5A
GO:BP	nitrogen compound metabolic process	GO:0006807	0.438607	0.510373	0.043234	1.36417	ACC,XRP1,ATPCL,PRAGE,CATHD,ATG1,USP32,SWS,UBI-P63E,SEV,EGL,CG8485,ALIX,HSF,GFAT1,CG7115,MTF-1,L(2)K01209,SNP,CTPSYN,CG1441,SPG7,RPN9,CCT7,SP7,DIP-C,HSC70-1,CG6201,POLY,SPIRIT,CG4945,CG7560,CG10352,CG14892,CG12866,UNC-4,GS2,ODA,EIF4G1,GLUT4EF,MNT,PAPLA1,MKP3,TOK,CNBP,GOL,VRI,SU(DX),GNMT,ROQ,ERF3,CG6330,RPS21,AKIRIN,EIF3J,EIF2BETA,USP8,NAA30A,EEF1DELTA,U2AF50,RPL24-LIKE,CG9911,GSTE3,CG11334,ADI1,AL…
GO:BP	endoplasmic reticulum to Golgi vesicle-mediated transport	GO:0006888	0.00633182	0.0207469	0.0443381	1.35322	PAPLA1,CG13887,ERGIC53,KDELR,SEC22,P24-1,BAI,LOJ,SAR1,RAB2,SYX5,YKT6,BOCA,ARL1,CG32576
GO:BP	establishment or maintenance of cell polarity	GO:0007163	0.017113	0.0387275	0.0467731	1.33	CV-C,CHC,EGL,POLY,RAB11,RAB6,LOLA,14-3-3ZETA,SGG,14-3-3EPSILON,SQD,CTP,SLIK,RAB5,MTS,RHO1,ROK,RAP1,CBL,RAN,DP,NUDE,CDC42,TSR,ABI,RAC1,PFDN2,SDS22
GO:BP	neuron maturation	GO:0042551	0.00496278	0.0179806	0.0478281	1.32032	USP8,SHEP,RIM,CTP,IMP,CHIC,EFF,FMR1,BSK,STAM,SKPA,PC,ATG6
GO:BP	cellular response to chemical stimulus	GO:0070887	0.0397022	0.0705394	0.0480929	1.31792	ACC,ATG1,LETM1,MTF-1,MGSTL,HSC70-1,POLY,MKP3,RAB10,HYDR2,TOM40,LST,CG12355,FKBP39,PRX2540-2,NCLB,SH,GGAMMA30A,CAM,SGG,WDB,DOPECR,WNK,MTS,PP1-87B,CHD64,CRTC,CG2918,MTNA,CHCHD2,CYP6W1,FMR1,RAP1,CYT-B5,GALPHAS,CG3061,BSK,SKPA,DH44,SIP3,TGO,EIF1,RAC1,RHEB,SIRUP,RAGC-D,STUB1,RABX4,GSTO3,CG14184,PEPCK2
GO:BP	eye photoreceptor cell development	GO:0042462	0.00864208	0.0248963	0.0481204	1.31767	SU(DX),RAB11,RAB6,NINAE,CAM,LOLA,PABP,DYSC,MOB2,SLIK,ATX2,TAU,CPN,SYND,RIP11,OC,TSR,RAC1
GO:CC	intracellular anatomical structure	GO:0005622	0.602538	0.794906	1.27e-28	27.8959	ACC,MHC,XRP1,ATPCL,CV-C,SCYL,CHC,CG9297,EMP,CG8036,PRAGE,CG31729,INOS,CATHD,ATG1,UP,SWS,LETM1,SCCPDH1,WUPA,KLP98A,TM2,UBI-P63E,AOX3,CG31694,CG9485,CDM,ALIX,MVL,HSF,MLC1,CAH2,TMEM63,SCPX,CG8839,DIC1,MLP60A,CG7115,MTF-1,RHOGAP15B,L(2)K01209,SNP,SDHC,C12.2,CTPSYN,CG1441,SPG7,PEX5,MGSTL,RPN9,CCT7,HSC70-1,CG6201,POLY,FATP2,GADD45,CYP4E3,AQP,CG7560,CYP4E1,CG10352,CG2065,UNC-4,VHA16-1,GS2,ODA,EIF4G1,VSG…
GO:CC	cytoplasm	GO:0005737	0.425325	0.603217	1.18e-21	20.9267	ACC,MHC,ATPCL,CV-C,SCYL,CHC,EMP,CG8036,CG31729,INOS,CATHD,ATG1,UP,SWS,LETM1,WUPA,KLP98A,UBI-P63E,AOX3,CG31694,CG9485,CDM,ALIX,MVL,MLC1,CAH2,TMEM63,SCPX,CG8839,DIC1,MLP60A,CG7115,MTF-1,RHOGAP15B,L(2)K01209,SNP,SDHC,C12.2,CTPSYN,CG1441,SPG7,PEX5,RPN9,CCT7,HSC70-1,CG6201,POLY,FATP2,GADD45,CYP4E3,AQP,CG7560,CYP4E1,CG10352,CG2065,VHA16-1,GS2,ODA,EIF4G1,VSG,PAPLA1,MKP3,CNBP,GOL,SU(DX),GNMT,NUCB1,RAB11,…
GO:CC	cellular anatomical entity	GO:0110165	0.880504	0.97185	4.89e-18	17.311	ACC,MHC,XRP1,ATPCL,CV-C,SCYL,CHC,CG9297,TEP4,EMP,CG8036,PRAGE,CG31729,INOS,CATHD,ATG1,UP,SWS,LETM1,SCCPDH1,CG1607,DLG5,RASGAP1,WUPA,KLP98A,TM2,UBI-P63E,SEV,AOX3,CG31694,CG9485,CDM,ALIX,CG9336,MVL,NIMB2,HSF,INE,MLC1,CV-2,CAH2,TMEM63,CG45076,RDOG,SCPX,CG8839,DIC1,MDR49,MLP60A,CG7115,MTF-1,RHOGAP15B,L(2)K01209,CG8399,CG9572,SNP,SDHC,C12.2,CTPSYN,CG1441,SPG7,PEX5,MGSTL,CG4239,RPN9,CCT7,SP7,CG6236,SUG…
GO:CC	intracellular membrane-bounded organelle	GO:0043231	0.459657	0.620643	1.39e-17	16.8584	ACC,XRP1,CHC,CG9297,EMP,PRAGE,CG31729,CATHD,ATG1,SWS,LETM1,WUPA,KLP98A,UBI-P63E,AOX3,CDM,ALIX,MVL,HSF,SCPX,CG8839,DIC1,MLP60A,CG7115,MTF-1,RHOGAP15B,L(2)K01209,SNP,SDHC,CG1441,SPG7,PEX5,MGSTL,RPN9,HSC70-1,CG6201,POLY,FATP2,GADD45,CYP4E3,CYP4E1,CG2065,UNC-4,VHA16-1,ODA,VSG,GLUT4EF,MNT,PAPLA1,CNBP,GOL,VRI,NUCB1,RAB11,MAPMODULIN,L(1)G0320,SEC61ALPHA,GLEC,RPS21,CG13887,TRX-2,RAB10,GP210,AKIRIN,CG1185…
GO:CC	intracellular organelle	GO:0043229	0.514719	0.670241	1.23e-16	15.9098	ACC,MHC,XRP1,CHC,CG9297,EMP,PRAGE,CG31729,CATHD,ATG1,UP,SWS,LETM1,SCCPDH1,WUPA,KLP98A,TM2,UBI-P63E,AOX3,CDM,ALIX,MVL,HSF,MLC1,SCPX,CG8839,DIC1,MLP60A,CG7115,MTF-1,RHOGAP15B,L(2)K01209,SNP,SDHC,CG1441,SPG7,PEX5,MGSTL,RPN9,HSC70-1,CG6201,POLY,FATP2,GADD45,CYP4E3,CYP4E1,CG2065,UNC-4,VHA16-1,ODA,VSG,GLUT4EF,MNT,PAPLA1,CNBP,GOL,VRI,NUCB1,RAB11,MAPMODULIN,ROQ,L(1)G0320,SEC61ALPHA,GLEC,RPS21,CG13887,TRX…
GO:CC	organelle	GO:0043226	0.524505	0.674263	1.91e-15	14.7199	ACC,MHC,XRP1,CHC,CG9297,EMP,PRAGE,CG31729,CATHD,ATG1,UP,SWS,LETM1,SCCPDH1,WUPA,KLP98A,TM2,UBI-P63E,AOX3,CDM,ALIX,MVL,HSF,MLC1,SCPX,CG8839,DIC1,MLP60A,CG7115,MTF-1,RHOGAP15B,L(2)K01209,SNP,SDHC,CG1441,SPG7,PEX5,MGSTL,RPN9,HSC70-1,CG6201,GRIK,POLY,FATP2,GADD45,CYP4E3,CYP4E1,CG2065,UNC-4,VHA16-1,ODA,VSG,GLUT4EF,MNT,PAPLA1,CNBP,GOL,VRI,NUCB1,RAB11,MAPMODULIN,ROQ,L(1)G0320,SEC61ALPHA,GLEC,RPS21,CG1388…
GO:CC	ribonucleoprotein complex	GO:1990904	0.0485115	0.123324	7.3e-15	14.1365	RPS21,EIF3J,EIF2BETA,U2AF50,RPL24-LIKE,NNP-1,MRPL24,MRPL30,NOP56,SRP9,CG12325,SRP19,FIB,RBM13,RPLP0-LIKE,MRPL19,L(1)G0020,CG6712,MRPL18,SHEP,PABP,HRB27C,AGO1,RM62,SQD,RBP1-LIKE,RPS7,RPS29,RPL6,MAHE,STAU,RPS23,TRAL,IMP,SSX,HRB98DE,RPL14,RPL28,CG4612,RPS28B,RPS11,RPL12,ACN,RPL9,RPS27,RPS13,RPS20,FMR1,EIF4E1,CG3198,EIF3H,CG4364,HRB87F,EIF3G1,QKR58E-1,NCM,CG3008,EIF1,CG5316,EIF3K,CG10333,CG17454,REG,…
GO:CC	membrane-bounded organelle	GO:0043227	0.478564	0.624665	2.16e-14	13.6646	ACC,XRP1,CHC,CG9297,EMP,PRAGE,CG31729,CATHD,ATG1,SWS,LETM1,WUPA,KLP98A,UBI-P63E,AOX3,CDM,ALIX,MVL,HSF,SCPX,CG8839,DIC1,MLP60A,CG7115,MTF-1,RHOGAP15B,L(2)K01209,SNP,SDHC,CG1441,SPG7,PEX5,MGSTL,RPN9,HSC70-1,CG6201,POLY,FATP2,GADD45,CYP4E3,CYP4E1,CG2065,UNC-4,VHA16-1,ODA,VSG,GLUT4EF,MNT,PAPLA1,CNBP,GOL,VRI,NUCB1,RAB11,MAPMODULIN,L(1)G0320,SEC61ALPHA,GLEC,RPS21,CG13887,TRX-2,RAB10,HYDR2,GP210,AKIRIN,…
GO:CC	intracellular organelle lumen	GO:0070013	0.0963596	0.171582	6.53e-09	8.18528	UBI-P63E,SNP,RPN9,ODA,MNT,PAPLA1,VRI,MAPMODULIN,GLEC,U2AF50,RPL24-LIKE,CG2199,CG32344,RS1,MRPL24,FKBP39,MRPL30,NO66,CG8414,NOP56,CG1785,NCLB,CG12325,SRP19,FIB,RBM13,CG15019,RPLP0-LIKE,MRPL19,L(1)G0020,NPH,CG6712,MRPL18,CAM,LOLA,MAMO,PDP1,SGG,HRB27C,WDB,14-3-3EPSILON,RM62,TLK,SQD,BACC,RBP1-LIKE,CG12605,CORTO,PDI,TRF2,CYCT,MTS,RPS11,PITS,IDH3A,MNN1,CYT-C-P,SD,TRF4-1,RPS13,CG2918,HIS4R,KAP-ALPHA3,CH…
GO:CC	organelle lumen	GO:0043233	0.0964425	0.171582	6.93e-09	8.15958	UBI-P63E,SNP,RPN9,ODA,MNT,PAPLA1,VRI,MAPMODULIN,GLEC,U2AF50,RPL24-LIKE,CG2199,CG32344,RS1,MRPL24,FKBP39,MRPL30,NO66,CG8414,NOP56,CG1785,NCLB,CG12325,SRP19,FIB,RBM13,CG15019,RPLP0-LIKE,MRPL19,L(1)G0020,NPH,CG6712,MRPL18,CAM,LOLA,MAMO,PDP1,SGG,HRB27C,WDB,14-3-3EPSILON,RM62,TLK,SQD,BACC,RBP1-LIKE,CG12605,CORTO,PDI,TRF2,CYCT,MTS,RPS11,PITS,IDH3A,MNN1,CYT-C-P,SD,TRF4-1,RPS13,CG2918,HIS4R,KAP-ALPHA3,CH…
GO:CC	membrane-enclosed lumen	GO:0031974	0.0964425	0.171582	6.93e-09	8.15958	UBI-P63E,SNP,RPN9,ODA,MNT,PAPLA1,VRI,MAPMODULIN,GLEC,U2AF50,RPL24-LIKE,CG2199,CG32344,RS1,MRPL24,FKBP39,MRPL30,NO66,CG8414,NOP56,CG1785,NCLB,CG12325,SRP19,FIB,RBM13,CG15019,RPLP0-LIKE,MRPL19,L(1)G0020,NPH,CG6712,MRPL18,CAM,LOLA,MAMO,PDP1,SGG,HRB27C,WDB,14-3-3EPSILON,RM62,TLK,SQD,BACC,RBP1-LIKE,CG12605,CORTO,PDI,TRF2,CYCT,MTS,RPS11,PITS,IDH3A,MNN1,CYT-C-P,SD,TRF4-1,RPS13,CG2918,HIS4R,KAP-ALPHA3,CH…
GO:CC	protein-containing complex	GO:0032991	0.255079	0.357909	1.93e-08	7.71475	MHC,XRP1,CHC,ATG1,UP,WUPA,KLP98A,SEV,CDM,HSF,MLC1,MDR49,SDHC,SPG7,RPN9,CCT7,POLY,VHA16-1,EIF4G1,COL4A1,VKG,ERF3,SEC61ALPHA,RPS21,GP210,AKIRIN,EIF3J,EIF2BETA,NAA30A,TOM40,EEF1DELTA,U2AF50,RPL24-LIKE,SEC22,SEC61BETA,NNP-1,OSTGAMMA,SEC61GAMMA,MRPL24,FKBP39,MRPL30,ROBL,PFDN5,NOP56,SRP9,CG12325,SRP19,FIB,RBM13,RPLP0-LIKE,MRPL19,L(1)G0020,CG6712,GAMMASNAP1,MRPL18,NINAE,ATPALPHA,SH,GGAMMA30A,CAM,SHEP,NO…
GO:CC	nuclear lumen	GO:0031981	0.0752965	0.13807	1.56e-07	6.80755	UBI-P63E,SNP,RPN9,ODA,MNT,PAPLA1,VRI,MAPMODULIN,GLEC,U2AF50,RPL24-LIKE,CG2199,CG32344,RS1,FKBP39,NO66,CG8414,NOP56,CG1785,NCLB,CG12325,SRP19,FIB,RBM13,CG15019,RPLP0-LIKE,L(1)G0020,NPH,CG6712,CAM,LOLA,MAMO,PDP1,SGG,HRB27C,WDB,14-3-3EPSILON,RM62,TLK,SQD,BACC,RBP1-LIKE,CG12605,CORTO,TRF2,CYCT,MTS,RPS11,PITS,MNN1,SD,TRF4-1,RPS13,HIS4R,KAP-ALPHA3,CHCHD2,EIF4E1,NELF-A,BSK,LOLAL,CG4364,CG1910,HRB87F,ELO…
GO:CC	nucleolus	GO:0005730	0.0228875	0.0603217	4.17e-07	6.37959	SNP,RPL24-LIKE,CG2199,CG32344,RS1,FKBP39,NO66,CG8414,NOP56,CG1785,NCLB,CG12325,SRP19,FIB,RBM13,CG15019,RPLP0-LIKE,L(1)G0020,NPH,CG6712,RM62,RPS11,TRF4-1,RPS13,CG4364,PC,CG12608,CG4806,CG11417,FRG1,CG18428,L(2)09851,CG3335,CG5645,CG7275,SAS10,CG11180,CG11583,CG9004,DBE,CG12301,CG18178,MED22,CG1789,POP1
GO:CC	cytosol	GO:0005829	0.0927938	0.156836	1.30057e-06	5.88587	ATPCL,CG8036,ATG1,KLP98A,UBI-P63E,CG31694,MLC1,CTPSYN,PEX5,RPN9,CCT7,HSC70-1,POLY,CG7560,CG10352,ODA,EIF4G1,MKP3,GNMT,ERF3,CG6330,RPS21,EIF2BETA,USP8,EEF1DELTA,RAB6,RPL24-LIKE,CG31997,CG11811,CG1236,PRX2540-2,CG2811,RPLP0-LIKE,PS,CAM,SHEP,LK6,14-3-3ZETA,PABP,SGG,WDB,14-3-3EPSILON,RM62,RUDHIRA,LARP4B,FLW,RPS7,LSD-2,RPS29,RPL6,PTPMEG2,CKIALPHA,RPS23,TRAL,IMP,CYP1,SSX,ATG8A,RPL14,RPL28,CG4612,RPS28B…
GO:CC	preribosome	GO:0030684	0.00671697	0.0281501	2.96177e-06	5.52845	NNP-1,NOP56,CG12325,FIB,RBM13,RPLP0-LIKE,L(1)G0020,CG6712,RPS7,RPS13,CG4364,CG3008,CG5645,CG2972,CG7275,SAS10,DBE,CG12301,RLB1,CG18178,CG1789
GO:CC	endomembrane system	GO:0012505	0.120159	0.189008	3.16218e-06	5.50001	CHC,CG31729,SWS,KLP98A,ALIX,MVL,CG8839,RHOGAP15B,CG11200,FATP2,CYP4E3,CYP4E1,CG2065,CNBP,GOL,NUCB1,RAB11,MAPMODULIN,L(1)G0320,SEC61ALPHA,RPS21,CG13887,RAB10,GP210,CG11857,SURF4,CG6870,FKBP14,ERGIC53,KDELR,RAB6,SEC22,CG9911,REEPB,SEC61BETA,TAPDELTA,CG7272,SSRBETA,P24-1,ALG1,RABX1,BAI,OSTGAMMA,CG7872,SEC61GAMMA,CG6665,LOJ,AGPAT4,NINAE,LK6,14-3-3ZETA,SAP47,NSYB,VMAT,RAB3,FER2LCH,RPS29,PATH,PDI,VAP33…
GO:CC	nucleus	GO:0005634	0.265777	0.353887	6.52392e-06	5.18549	XRP1,PRAGE,WUPA,UBI-P63E,CDM,HSF,MLP60A,CG7115,MTF-1,L(2)K01209,SNP,RPN9,HSC70-1,POLY,GADD45,UNC-4,ODA,GLUT4EF,MNT,PAPLA1,CNBP,GOL,VRI,RAB11,MAPMODULIN,GLEC,TRX-2,GP210,AKIRIN,VIG2,U2AF50,RPL24-LIKE,CG6805,CG11334,ADI1,NMD3,NNP-1,CG11811,CG2199,CG32344,RS1,FKBP39,NO66,CG8414,NOP56,CG1785,NCLB,CG12325,SRP19,FIB,RBM13,CG15019,RPLP0-LIKE,L(1)G0020,NPH,CG6712,DMRT99B,ATPALPHA,PS,CAM,SHEP,LK6,LOLA,MAM…
GO:CC	endoplasmic reticulum	GO:0005783	0.0577992	0.105898	1.9788e-05	4.7036	SWS,FATP2,CYP4E3,CYP4E1,CG2065,CNBP,MAPMODULIN,L(1)G0320,SEC61ALPHA,RPS21,CG13887,CG11857,SURF4,CG6870,FKBP14,ERGIC53,KDELR,SEC22,CG9911,REEPB,SEC61BETA,TAPDELTA,SSRBETA,P24-1,ALG1,BAI,OSTGAMMA,CG7872,SEC61GAMMA,LOJ,NINAE,RPS29,PDI,VAP33,RPS23,TRAL,CG30389,CNX99A,CG2918,CG8405,SAR1,CYP6W1,TBC,RAB2,CG7990,CYT-B5,CYP4E2,MSBP,HOMER,CG3061,TANGO5,CG13585,FKBP12,MTP,FAF2,CASP,AGPAT1,SIP3,SYX5,NES,SCF,…
GO:CC	intracellular non-membrane-bounded organelle	GO:0043232	0.160461	0.225201	0.000275551	3.5598	MHC,UP,SCCPDH1,WUPA,KLP98A,TM2,ALIX,HSF,MLC1,MLP60A,SNP,RAB11,ROQ,RPS21,AKIRIN,VIG2,RPL24-LIKE,CG2199,CG32344,RS1,MRPL24,FKBP39,MRPL30,NO66,CG8414,ROBL,NOP56,CG1785,NCLB,CG12325,SRP19,FIB,RBM13,CG15019,RPLP0-LIKE,MRPL19,L(1)G0020,NPH,CG6712,MRPL18,CAM,LK6,RIM,MAMO,PABP,SGG,BSG,HRB27C,AGO1,14-3-3EPSILON,RM62,TLK,SQD,HIS3.3B,LARP4B,CTP,TNA,ENS,RPS7,SLIK,CORTO,ATX2,LSD-2,RPS29,RPL6,STAU,TAU,TRF2,VAP…
GO:CC	non-membrane-bounded organelle	GO:0043228	0.160461	0.225201	0.000275551	3.5598	MHC,UP,SCCPDH1,WUPA,KLP98A,TM2,ALIX,HSF,MLC1,MLP60A,SNP,RAB11,ROQ,RPS21,AKIRIN,VIG2,RPL24-LIKE,CG2199,CG32344,RS1,MRPL24,FKBP39,MRPL30,NO66,CG8414,ROBL,NOP56,CG1785,NCLB,CG12325,SRP19,FIB,RBM13,CG15019,RPLP0-LIKE,MRPL19,L(1)G0020,NPH,CG6712,MRPL18,CAM,LK6,RIM,MAMO,PABP,SGG,BSG,HRB27C,AGO1,14-3-3EPSILON,RM62,TLK,SQD,HIS3.3B,LARP4B,CTP,TNA,ENS,RPS7,SLIK,CORTO,ATX2,LSD-2,RPS29,RPL6,STAU,TAU,TRF2,VAP…
GO:CC	membrane protein complex	GO:0098796	0.0471017	0.0857909	0.000444625	3.35201	CHC,MDR49,SDHC,SPG7,VHA16-1,SEC61ALPHA,TOM40,SEC22,SEC61BETA,OSTGAMMA,SEC61GAMMA,GAMMASNAP1,NINAE,ATPALPHA,SH,GGAMMA30A,NORPA,RDL,NRV3,NSYB,IH,HK,PORIN,VHA44,INAD,COX6B,COX5A,FLO2,LEVY,SAR1,VHA13,GALPHAS,ATPSYNDELTA,COX7C,ATPSYNE,CG7630,CYPE,CG9132,VPS26,SUN,ND-B17,SIP3,NEB-CGP,MGE,SYX5,SNX3,ND-ASHI,EMC7,UQCR-11,ND-B18,OX,ND-B14,UQCR-6.4,TOM7,YKT6,SPASE22-23,EMC4,ZETACOP,CG14184,ATG6,DAD1,VPS29,E…
GO:CC	ribosome	GO:0005840	0.01559	0.038874	0.00104313	2.98166	RPS21,RPL24-LIKE,MRPL24,MRPL30,RPLP0-LIKE,MRPL19,MRPL18,RPS7,RPS29,RPL6,RPS23,RPL14,RPL28,RPS28B,RPS11,RPL12,RPL9,RPS27,RPS13,RPS20,CG14184,MRPS26,MRPS11,MRPL47,MRPS14,MRPL9,MRPL27,MRPL33,MRPS33
GO:CC	nucleoplasm	GO:0005654	0.0473505	0.0844504	0.00107901	2.96697	UBI-P63E,RPN9,ODA,MNT,PAPLA1,VRI,MAPMODULIN,GLEC,U2AF50,CG1785,NCLB,FIB,NPH,CAM,LOLA,PDP1,SGG,HRB27C,WDB,14-3-3EPSILON,TLK,SQD,BACC,RBP1-LIKE,CG12605,CORTO,TRF2,CYCT,MTS,PITS,MNN1,SD,KAP-ALPHA3,CHCHD2,EIF4E1,NELF-A,BSK,CG4364,CG1910,HRB87F,ELOB,TSR,NCM,REG,KEN,TFIIFALPHA,MBD-LIKE,RPN12,CKA,BOCKS,TFIIA-S,MED6,WDS,SEM1,FRG1,CG18428,COIL,CG3335,TAF10,MAT1,DBE,RPT6,ADK2
GO:CC	intracellular vesicle	GO:0097708	0.0413799	0.0764075	0.00109062	2.96233	CHC,CG31729,KLP98A,ALIX,MVL,VSG,PAPLA1,GOL,RAB11,RAB10,ERGIC53,RAB6,SEC22,P24-1,RABX1,BAI,LOJ,NINAE,14-3-3ZETA,NSYB,VMAT,RAB3,PATH,VAP33,RAB5,LAMP1,RHO1,SYND,FLO2,RIP11,FRQ2,SAR1,TBC,RAB2,RAB7,MRVA,STAM,SAU,RHOGAP68F,SCAMP,CANB,CG9132,RAB14,VPS26,SNX3,SCF,TM9SF4,HOOK,RAC1,RAP2L,CG30423,RABX4,YKT6,ZETACOP,CG14184,VPS29,EMC5
GO:CC	cytoplasmic vesicle	GO:0031410	0.0413799	0.0764075	0.00109062	2.96233	CHC,CG31729,KLP98A,ALIX,MVL,VSG,PAPLA1,GOL,RAB11,RAB10,ERGIC53,RAB6,SEC22,P24-1,RABX1,BAI,LOJ,NINAE,14-3-3ZETA,NSYB,VMAT,RAB3,PATH,VAP33,RAB5,LAMP1,RHO1,SYND,FLO2,RIP11,FRQ2,SAR1,TBC,RAB2,RAB7,MRVA,STAM,SAU,RHOGAP68F,SCAMP,CANB,CG9132,RAB14,VPS26,SNX3,SCF,TM9SF4,HOOK,RAC1,RAP2L,CG30423,RABX4,YKT6,ZETACOP,CG14184,VPS29,EMC5
GO:CC	ribosomal subunit	GO:0044391	0.0148437	0.0375335	0.00115501	2.93741	RPS21,RPL24-LIKE,MRPL24,MRPL30,RPLP0-LIKE,MRPL19,MRPL18,RPS7,RPS29,RPL6,RPS23,RPL14,RPL28,RPS28B,RPS11,RPL12,RPL9,RPS27,RPS13,RPS20,MRPS26,MRPS11,MRPL47,MRPS14,MRPL9,MRPL27,MRPL33,MRPS33
GO:CC	rough endoplasmic reticulum	GO:0005791	0.00165851	0.0107239	0.00315045	2.50163	SEC61ALPHA,RPS21,SEC61BETA,SEC61GAMMA,RPS29,PDI,RPS23,CG30389
GO:CC	cytoplasmic stress granule	GO:0010494	0.00165851	0.0107239	0.00315045	2.50163	ROQ,PABP,LARP4B,ATX2,STAU,SSX,CG4612,FMR1
GO:CC	mitochondrial protein-containing complex	GO:0098798	0.0229704	0.0469169	0.0101286	1.99445	SDHC,SPG7,TOM40,MRPL24,MRPL30,MRPL19,MRPL18,COX6B,IDH3A,COX5A,LEVY,ATPSYNDELTA,COX7C,ATPSYNE,CG7630,CYPE,SUN,ND-B17,NEB-CGP,MGE,ND-ASHI,UQCR-11,ND-B18,OX,ND-B14,UQCR-6.4,TOM7,MRPS26,MRPS11,MRPL47,MRPS14,MRPL9,MRPL27,MRPL33,MRPS33
GO:CC	rhabdomere	GO:0016028	0.0035658	0.0147453	0.0103035	1.98701	NINAE,GGAMMA30A,CAM,NORPA,MOB2,SLIK,INAD,RH6,SYND,CDC42,RAC1
GO:CC	vesicle	GO:0031982	0.045692	0.077748	0.010376	1.98397	CHC,CG31729,KLP98A,ALIX,MVL,VSG,PAPLA1,GOL,RAB11,RAB10,ERGIC53,RAB6,SEC22,P24-1,RABX1,BAI,LOJ,NINAE,14-3-3ZETA,NSYB,VMAT,RAB3,PATH,VAP33,RAB5,LAMP1,RHO1,SYND,FLO2,RIP11,FRQ2,SAR1,TBC,RAB2,RAB7,MRVA,STAM,SAU,RHOGAP68F,SCAMP,CANB,CG9132,RAB14,VPS26,SNX3,SCF,TM9SF4,HOOK,RAC1,CG6656,RAP2L,CG30423,RABX4,YKT6,ZETACOP,CG14184,VPS29,EMC5
GO:CC	small-subunit processome	GO:0032040	0.00364873	0.0147453	0.0129795	1.88674	NOP56,CG12325,FIB,L(1)G0020,RPS7,RPS13,CG7275,SAS10,DBE,CG12301,CG1789
GO:CC	synapse	GO:0045202	0.0370678	0.0656836	0.0149301	1.82594	CV-C,CHC,LETM1,CDM,GRIK,LBM,RAB11,RAB10,RAB6,RABX1,GAMMASNAP1,ATPALPHA,RIM,RDL,SAP47,PABP,NSYB,DYSC,SGG,BSG,DOPECR,VMAT,RAB3,STAU,FRQ1,VAP33,ATG8A,RAB5,CKIIBETA,SYND,FRQ2,FMR1,EIF4E1,RAB2,RAB7,GALPHAS,HOMER,SCAMP,CANB,RAB14,CDC42,ARL8,HOOK,MANF,RABX4,GB,VPS29,ARL1,CBP20
GO:CC	organelle membrane	GO:0031090	0.104403	0.146113	0.0344143	1.46326	CHC,SWS,LETM1,SDHC,SPG7,PEX5,CYP4E3,CYP4E1,CG2065,VHA16-1,GOL,RAB11,L(1)G0320,SEC61ALPHA,CG13887,GP210,CG11857,SURF4,CG6870,ERGIC53,KDELR,TOM40,RAB6,SEC22,CG9911,SEC61BETA,TAPDELTA,CG7272,SSRBETA,OSTGAMMA,CG7872,SEC61GAMMA,CG8303,14-3-3ZETA,NSYB,VMAT,PORIN,PATH,VHA44,VAP33,CG30389,ATG8A,CNX99A,LAMP1,RILPL,COX6B,COX5A,LEVY,SAR1,CYP6W1,FMR1,RAB2,CG7990,CYT-B5,VHA13,CYP4E2,RAB7,CG3061,ATPSYNDELTA,CO…
GO:CC	cytosolic ribosome	GO:0022626	0.00854134	0.0227882	0.0424323	1.3723	RPS21,RPL24-LIKE,RPLP0-LIKE,RPS7,RPS29,RPL6,RPS23,RPL14,RPL28,RPS28B,RPS11,RPL12,RPL9,RPS27,RPS13,RPS20,MRPS11
GO:CC	cytochrome complex	GO:0070069	0.0029024	0.0120643	0.0489623	1.31014	COX6B,COX5A,LEVY,COX7C,CG7630,CYPE,UQCR-11,OX,UQCR-6.4
KEGG	Circadian rhythm - fly	KEGG:04711	0.00367128	0.0201342	0.0147812	1.83029	VRI,PDP1,SGG,TYF,ATX2,LSM12A
KEGG	Protein export	KEGG:03060	0.00847218	0.0302013	0.0232674	1.63325	SEC61ALPHA,SEC61BETA,SEC61GAMMA,SRP9,SRP19,CG7546,SGT,SPASE22-23,SRP14
WP	Translation factors	WP:WP537	0.1	0.333333	0.000213911	3.66977	EIF4G1,EIF3J,EIF2BETA,EEF1DELTA,PABP,EEF1ALPHA2,EIF5B,EIF4H1,EIF4E1,CG8963,EIF3H,EIF1
TF	Factor: BEAF32; motif: NTATCGATAKTTNN	TF:M12357	0.0788213	0.133498	8.57107e-06	5.06697	CHC,PRAGE,MAP205,USP32,CG31694,CG9485,TMEM63,CG7115,RHOGAP15B,CG8399,SDHC,CG4239,DIP-C,CG11200,CG31886,ODA,EIF4G1,CNBP,GP210,CG8814,CG10576,VIG2,NAA30A,NMD3,CG1532,CG8414,ROBL,PFDN5,SRP19,NRV3,PABP,14-3-3EPSILON,FLW,RBP1-LIKE,RPS7,WNK,MAHE,PDI,VAP33,CYCT,CG30389,CNOT4,DCP2,RPL28,EFF,RANBPM,MTS,LAMP1,RPL12,RHO1,IDH3A,ACN,PP1-87B,MLF,DLIC,RPS13,KAP-ALPHA3,CG8405,SAR1,NELF-A,DEAF1,CG4364,CG8188,RHOG…
TF	Factor: SRYDELTA; motif: YTATCGATAKTT	TF:M12368	0.106073	0.163164	6.70551e-05	4.17357	CHC,PRAGE,MAP205,USP32,SWS,CG31694,CG9485,TMEM63,CG7115,RHOGAP15B,L(2)K01209,SDHC,SPG7,CG4239,DIP-C,CG11200,CG31886,AQP,ODA,EIF4G1,TOK,CNBP,RAB11,GP210,CG8814,CG10576,KDELR,VIG2,EEF1DELTA,NMD3,CG11811,CG1532,CG8414,ROBL,PFDN5,SRP19,MRPL19,NRV3,PABP,14-3-3EPSILON,RBP1-LIKE,RPS7,WNK,RPL6,MAHE,PDI,VAP33,CG30389,CNOT4,DCP2,RPL28,EFF,RANBPM,MTS,LAMP1,RPL12,RHO1,IDH3A,CG14478,PP1-87B,MLF,DLIC,TSP97E,WC…
TF	Factor: BEAF-32A; motif: NNNMNAMTATCGATA	TF:M07142	0.0746012	0.122373	0.000161194	3.79265	CHC,PRAGE,MAP205,USP32,DLG5,CG31694,CG9485,CG7115,RHOGAP15B,SDHC,CG4239,DIP-C,CG11200,ODA,EIF4G1,GP210,CG8814,CG10576,ERGIC53,VIG2,NAA30A,RAB6,CG13364,CG1532,ROBL,PFDN5,MOB2,14-3-3EPSILON,FLW,RBP1-LIKE,RPS7,RPL6,MAHE,PDI,VAP33,CYCT,CG30389,CNOT4,DCP2,RPL28,EFF,RANBPM,MTS,RPL12,IDH3A,ACN,DLIC,RPS13,LEVY,KAP-ALPHA3,CG8405,NELF-A,DEAF1,RAB7,CG15771,CG8188,HRB87F,RB97D,ELOB,AGPAT1,SIP3,MICAL-LIKE,HDC…
TF	Factor: DREF; motif: ASCTATCGATADNY	TF:M00488	0.0952006	0.147095	0.000237353	3.62461	PRAGE,MAP205,USP32,CG31694,CG9485,CG7115,RHOGAP15B,L(2)K01209,SDHC,SPG7,CG4239,DIP-C,AQP,ODA,EIF4G1,TOK,L(1)G0320,GP210,CG8814,CG10576,KDELR,EEF1DELTA,RAB6,RPL24-LIKE,NMD3,CG11811,CG13364,CG1532,ROBL,SRP19,RBM13,CG15019,RPLP0-LIKE,MRPL19,NRV3,MOB2,14-3-3EPSILON,RM62,RBP1-LIKE,CG43066,RPS7,WNK,RPL6,MAHE,PDI,CG30389,CNOT4,DCP2,RPL28,RPS28B,EFF,RANBPM,MTS,LAMP1,RPL12,ATG17,ACN,PP1-87B,DLIC,TSP97E,RP…
TF	Factor: pnr; motif: TATCGATAGNY	TF:M07149	0.0668049	0.110012	0.00054955	3.25999	MAP205,USP32,CG9485,SCPX,CG7115,RHOGAP15B,L(2)K01209,CG8399,DIP-C,GP210,KDELR,NAA30A,RAB6,CG11811,SRP19,RBM13,CG15019,NRV3,MOB2,14-3-3EPSILON,RM62,FLW,RBP1-LIKE,CG43066,RPS7,WNK,RPL6,MAHE,CNOT4,RPL28,EFF,MTS,LAMP1,ACN,TRF4-1,DLIC,RPS13,LEVY,CG8405,ALPH,CHCHD2,NELF-A,RAB2,VHA13,DEAF1,RAB7,CG14591,CG4364,CG8188,CG14435,HRB87F,RB97D,ELOB,TSR,AGPAT1,MICAL-LIKE,SYX5,EIF1,ARL8,TM9SF4,HOOK,ND-ASHI,EMC7,…
TF	Factor: BEAF-32A; motif: NNNMNAMTATCGATA; match class: 1	TF:M07142_1	0.0178814	0.039555	0.00651049	2.18639	MAP205,CG4239,FLW,RBP1-LIKE,RPS7,PDI,VAP33,DCP2,EFF,MTS,ACN,DLIC,LEVY,KAP-ALPHA3,DEAF1,CG8188,RB97D,ELOB,MICAL-LIKE,NTF-2,ND-ASHI,LSM12A,CG11267,REG,CG3760,PCMT,FRG1,L(2)09851,CG5645,ADK2,SRP14,PFDN1
TF	Factor: pnr; motif: TATCGATAGNY; match class: 1	TF:M07149_1	0.0171662	0.0383189	0.00730482	2.13639	USP32,CG7115,RHOGAP15B,SRP19,MOB2,FLW,RPS7,WNK,EFF,MTS,ACN,RPS13,ALPH,DEAF1,CG14435,RB97D,ELOB,AGPAT1,MICAL-LIKE,SYX5,HOOK,ND-ASHI,JWA,CG11267,RAGC-D,REG,CG8389,UFC1,MRPS14,RLB1,SRP14
			#DIV/0!	#DIV/0!
			#DIV/0!	#DIV/0!
			#DIV/0!	#DIV/0!
			#DIV/0!	#DIV/0!
			#DIV/0!	#DIV/0!
			#DIV/0!	#DIV/0!
			#DIV/0!	#DIV/0!
			#DIV/0!	#DIV/0!
			#DIV/0!	#DIV/0!
			#DIV/0!	#DIV/0!
			#DIV/0!	#DIV/0!
			#DIV/0!	#DIV/0!
			#DIV/0!	#DIV/0!
			#DIV/0!	#DIV/0!
			#DIV/0!	#DIV/0!
			#DIV/0!	#DIV/0!
			#DIV/0!	#DIV/0!
			#DIV/0!	#DIV/0!
			#DIV/0!	#DIV/0!
			#DIV/0!	#DIV/0!
			#DIV/0!	#DIV/0!
			#DIV/0!	#DIV/0!
			#DIV/0!	#DIV/0!
			#DIV/0!	#DIV/0!
			#DIV/0!	#DIV/0!
			#DIV/0!	#DIV/0!
			#DIV/0!	#DIV/0!
			#DIV/0!	#DIV/0!
			#DIV/0!	#DIV/0!
			#DIV/0!	#DIV/0!
			#DIV/0!	#DIV/0!
			#DIV/0!	#DIV/0!
			#DIV/0!	#DIV/0!
			#DIV/0!	#DIV/0!
			#DIV/0!	#DIV/0!
			#DIV/0!	#DIV/0!
			#DIV/0!	#DIV/0!
			#DIV/0!	#DIV/0!
			#DIV/0!	#DIV/0!
			#DIV/0!	#DIV/0!
			#DIV/0!	#DIV/0!
			#DIV/0!	#DIV/0!
			#DIV/0!	#DIV/0!
			#DIV/0!	#DIV/0!
			#DIV/0!	#DIV/0!
			#DIV/0!	#DIV/0!
			#DIV/0!	#DIV/0!
			#DIV/0!	#DIV/0!
			#DIV/0!	#DIV/0!
			#DIV/0!	#DIV/0!
			#DIV/0!	#DIV/0!
			#DIV/0!	#DIV/0!
			#DIV/0!	#DIV/0!
			#DIV/0!	#DIV/0!
			#DIV/0!	#DIV/0!
			#DIV/0!	#DIV/0!
			#DIV/0!	#DIV/0!
			#DIV/0!	#DIV/0!
			#DIV/0!	#DIV/0!
			#DIV/0!	#DIV/0!
			#DIV/0!	#DIV/0!
			#DIV/0!	#DIV/0!
			#DIV/0!	#DIV/0!
			#DIV/0!	#DIV/0!
			#DIV/0!	#DIV/0!
			#DIV/0!	#DIV/0!
