# Supplementary material for: A memory transcriptome time course reveals essential long-term memory transcription factors.
Source: Research Square preprint supplement (doi:10.21203/rs.3.rs-5746840/v1), 2025-01-08
Supplement: Supplementary file 6 [file c2181fb8eed1fe865baccbdb.xlsx]

## Sheet: Genotypes
Table S9 - Crosses and genotypes1
Figure	Parental line A	Parental line B	Genotype
Figure 1, 2A,2E,2F,7E,7F,8A,8B,8D, S8A,S8B,S9A,S9B,S9C,S9D	w*; UAS-Unc84::2xGFP; R14H06-Gal4	Canton-R/Oregon-S	w*; UAS-Unc84::2xGP/+; R14H06-Gal4/+
	Genotype
Figure 2B	Canton-R/Oregon-S
	Parental line A	Parental line B	Genotype
Figure 3A	6xCRE-splitGal4AD	UAS-eGFP;R21B06-splitGal4DBD	6xCRE-splitGal4AD/UAS-eGFP; R21B06-splitGal4DBD/+
	rut2080; 6xCRE-splitGal4AD	UAS-eGFP;R21B06-splitGal4DBD	rut2080; 6xCRE-splitGal4AD/UAS-eGFP; R21B06-splitGal4DBD/+
	Parental line A	Parental line B	Genotype
Figure S6I	y[1]v[1];{UAS-Hr38-RNAi}attp2 (TRIP29376)	Canton-R/Oregon-S	+;{UAS-Hr38-RNAi}attp2/+
	y[1]v[1];{UAS-sr-RNAi}attp2 (TRIP27701)	Canton-R/Oregon-S	+;{UAS-sr-RNAi}attp2/+
LEGEND
1 - w* - indicates a w[1118] isogenic chromosome maintained in the lab

## Sheet: Suppl Fig S6
gene_name	UAS-RNAi line	Control parental line	Gal4 parental line (Suppl fig S6)	Gal4 parental line (Suppl fig S7)	Temperature conditions
HnRNP-K	BL42540	BL36304	w*;tubGal80(ts);R14H06-Gal4		17ºC during development and 29ºC 24h before the experiment
cora	BL51845	BL36304	w*;tubGal80(ts);R14H06-Gal4	w*;tubGal80(ts);MB247-gal4	17ºC during development and 29ºC 24h before the experiment
CG31345	BL61911	BL36304	w*;tubGal80(ts);R14H06-Gal4		17ºC during development and 29ºC 24h before the experiment
luna	BL62298	BL36304	w*;tubGal80(ts);R14H06-Gal4		17ºC during development and 29ºC 24h before the experiment
CG14190	BL62332	BL36304	w*;tubGal80(ts);R14H06-Gal4		17ºC during development and 29ºC 24h before the experiment
CG2915	BL63627	BL36304	w*;tubGal80(ts);R14H06-Gal4	w*;tubGal80(ts);MB247-gal4	17ºC during development and 29ºC 24h before the experiment
CG44247	VDRC105478	VDRC60100	w*;tubGal80(ts);R14H06-Gal4		17ºC during development and 29ºC 24h before the experiment
CG12531	VDRC105771	VDRC60100	w*;tubGal80(ts);R14H06-Gal4		17ºC during development and 29ºC 24h before the experiment
Jeb	VDRC103047	VDRC60100	w*;tubGal80(ts);R14H06-Gal4		17ºC during development and 29ºC 24h before the experiment
CG32204	BL28308	BDSC36303	w*;tubGal80(ts);R14H06-Gal4		17ºC during development and 29ºC 24h before the experiment
svr	BDSC44487	BDSC36303	w*;tubGal80(ts);R14H06-Gal4		17ºC during development and 29ºC 24h before the experiment
Hr38	BDSC29376	BDSC36303	w*;tubGal80(ts);R14H06-Gal4		17ºC during development and 29ºC 24h before the experiment
sr	BDSC27701	BDSC36303	w*;tubGal80(ts);R14H06-Gal4		17ºC during development and 29ºC 24h before the experiment
Eip75B	BL26717	BL36303	w*;UAS-dcr2;R14H06-Gal4		25ºC
CG8209	V100483	V60100	w*;tubGal80(ts);R14H06-Gal4		25ºC
nolo	BL55296	BL36303	w*; MB247-Gal4		25ºC
14-3-3zeta	BL31498	BL36303	w*;UAS-dcr2;R14H06-Gal4		25ºC
msl-2	BL31627	BL36303	w*;UAS-dcr2;R14H06-Gal4	w*;UAS-dcr2;R14H06-Gal5	25ºC
pum	BL26725	BL36303	w*;UAS-dcr2;R14H06-Gal4		25ºC
pan	BL26743	BL36303	w*;UAS-dcr2;R14H06-Gal4	w*;UAS-dcr2;R14H06-Gal4	25ºC
LpR1	BL27249	BL36303	w*;UAS-dcr2;R14H06-Gal4	w*;UAS-dcr2;R14H06-Gal4	25ºC
cpo	BL28360	BL36303	w*;UAS-dcr2;R14H06-Gal4	w*;UAS-dcr2;R14H06-Gal4	25ºC
hig	BL28376	BL36303	w*;UAS-dcr2;R14H06-Gal4		25ºC
mbl	BL28585	BL36303	w*;UAS-dcr2;R14H06-Gal4		25ºC
Ten-a	BL29439	BL36303	w*;UAS-dcr2;R14H06-Gal4	w*;UAS-dcr2;R14H06-Gal5	25ºC
CG8042	V103647	V60100	w*;tubGal80(ts);R14H06-Gal4		25ºC
CG4562	BL32842	BL36303	w*; MB247-Gal4		25ºC
mei-P26	BL57268	BL36304	w*;UAS-dcr2;R14H06-Gal4	w*;UAS-dcr2;R14H06-Gal5	25ºC
CG14903	BL38949	BL36303	w*; MB247-Gal4		25ºC
DIP-lambda	BL41980	BL36303	w*; MB247-Gal4		25ºC
ctp	BL44044	BL36303	w*; MB247-Gal4		25ºC
CG3558	V101967	V60100	w*;tubGal80(ts);R14H06-Gal4		25ºC
Drip	BL44661	BL36303	w*; MB247-Gal4		25ºC
CG11700	BL32933	BL36303	w*; MB247-Gal4	w*; MB247-Gal4	25ºC
LysRS	BL32967	BL36303	w*; MB247-Gal4	w*; MB247-Gal5	25ºC
CG6903	BL33423	BL36303	w*; MB247-Gal4		25ºC
sdt	BL33909	BL36303	w*; MB247-Gal4	w*; MB247-Gal5	25ºC
I(3)80Fj	BL34355	BL36303	w*; MB247-Gal4		25ºC
fs(1)h	BL41693	BL36303	w*;tubGal80(ts);R14H06-Gal4	w*;tubGal80(ts);R14H06-Gal5	17ºC during development and 29ºC 24h before the experiment
pyd	BL28920	BL36303	w*;UAS-dcr2;R14H06-Gal4	w*;UAS-dcr2;R14H06-Gal5	25ºC
tsu	BL55367	BL36304	w*;UAS-dcr2;R14H06-Gal4		25ºC
smox	BL41670	BL36304	w*;tubGal80(ts);R14H06-Gal4	w*;tubGal80(ts);R14H06-Gal5	25ºC
sqd	BL55169	BL36304	w*;tubGal80(ts);R14H06-Gal4		25ºC
CG31301	BL60121	BL36304	w*;UAS-dcr2;R14H06-Gal4	w*;UAS-dcr2;R14H06-Gal5	25ºC
CG17691	BL60133	BL36304	w*;tubGal80(ts);MB247-Gal4	w*;tubGal80(ts);R14H06-Gal5	25ºC
Sfxn2	BL61181	BL36304	w*;tubGal80(ts);R14H06-Gal4		25ºC
CG7378	BL65921	BL36304	w*;UAS-dcr2;MB247-Gal4	w*;UAS-dcr2;R14H06-Gal5	25ºC
g	BL67962	BL36304	w*;UAS-dcr2;R14H06-Gal4		25ºC
CG4467	BL77357	BL36304	w*;UAS-dcr2;R14H06-Gal4		25ºC
