# Supplementary material for: A memory transcriptome time course reveals essential long-term memory transcription factors.
Source: Research Square preprint supplement (doi:10.21203/rs.3.rs-5746840/v1), 2025-01-08
Supplement: Supplementary file 7 [file d5f952e702cb00da2ce15668.xlsx]

## Sheet: Curated
Cluster	source	term_name	term_id	GeneRatio	BgRatio	pvalue	p.adjust	qvalue	geneID
1	CC	neuron projection	GO:0043005	34/273	453/12100	6.41475e-10	1.69991e-07	1.2762e-07	Sdc/jeb/plum/DIP-delta/fra/CadN/dpr18/sli/dpr13/Dscam3/Syn/Pdfr/Cbp53E/nAChRalpha3/orb/klg/Rab11/par-1/AstA-R1/Ptp99A/Acsl/dpr15/Ca-alpha1T/CG44153/CASK/mnb/hep/Trim9/dpr2/gukh/Dscam2/AstC-R2/Ptp10D/nAChRalpha7
	CC	cytoplasmic vesicle	GO:0031410	32/273	443/12100	5.46841e-09	4.26769e-07	3.20395e-07	IA-2/CG1275/jeb/lovit/Fas3/Sytbeta/TM9SF2/Syn/7B2/Rab11/Pten/Mvb12/Ykt6/cmpy/Evi5/Arf79F/AP-2sigma/Sec24CD/bai/unc-13-4A/p24-1/Tbh/fz2/Gdi/Ist1/Syx6/Rph/Rab5/Frq2/vsg/cm/nwk
	CC	synapse	GO:0045202	23/273	306/12100	4.34203e-07	1.4383e-05	1.0798e-05	Sdc/jeb/lovit/Fas3/Sytbeta/Syn/Cbp53E/nAChRalpha3/orb/Rab11/par-1/CASK/mnb/unc-13-4A/Sap47/Gdi/Syx6/gukh/Rph/Rab5/Frq2/nwk/nAChRalpha7
	MF	calcium ion binding	GO:0005509	17/254	202/12049	1.26475e-06	0.000219434	0.000183056	Cnx99A/CadN/Sytbeta/stan/sli/Lrp4/Cbp53E/sqh/NUCB1/Cad87A/norpA/CadN2/Calr/AnxB11/Frq2/Dgk/Calx
	MF	GTPase regulator activity	GO:0030695	14/254	162/12049	8.22226e-06	0.000713281	0.000595032	RapGAP1/tbc/Epac/RhoGEF3/Cdep/Nf1/Evi5/siz/Asap/Rlip/CG1695/Gdi/CG3703/Tbc1d15-17
	BP	axon guidance	GO:0007411	26/282	260/12175	3.21235e-10	2.98266e-07	2.30782e-07	Sdc/jeb/fra/Fas3/CadN/stan/capt/sli/Dscam3/beat-Ib/nvy/SCAR/sm/dally/Ptp99A/CadN2/beat-IIb/uzip/beat-IIa/beat-IIIb/CG44153/hep/fz2/Trim9/Dscam2/Ptp10D
2	CC	mitochondrial protein-containing complex	GO:0098798	97/824	256/12100	4.0929e-48	1.68218e-45	1.18909e-45	Cyt-c1/ND-30/blw/COX4/ATPsynF/QIL1/ATPsynbeta/ATPsynC/COX5A/SdhD/ATPsynD/ND-B14.7/ATPsyngamma/SdhC/ND-B14.5B/ND-18/ND-49/ND-19/mRpL45/ND-20/mRpS33/SdhA/mRpS23/ND-75/COX5B/mRpL35/mRpL27/RFeSP/sun/ND-ACP/ND-39/UQCR-Q/mRpS30/mRpL24/CG7430/ND-B14.5A/ND-MWFE/ATPsynCF6/mRpL1/levy/mRpL51/ATPsynO/mRpS5/mRpL20/ND-42/ND-B22/ND-B17.2/SdhB/mRpL16/Pdhb/mRpL28/ND-23/muc/mRpL52/Chchd3/ATPsynE/ND-B17/ND-13B/Pdha…
	MF	cation transmembrane transporter activity	GO:0008324	65/785	338/12049	1.26188e-15	5.84588e-13	4.59255e-13	Cyt-c1/GC1/Atpalpha/blw/COX4/ATPsynF/ATPsynbeta/ATPsynC/COX5A/ATPsynD/Sfxn2/ATPsyngamma/cype/Hk/Vha26/COX5B/RFeSP/sun/UQCR-Q/ATPsynCF6/levy/mfrn/CG43066/ATPsynO/Nmdar1/COX7A/ATPsynE/CG1090/UQCR-6.4/CG42542/CG42594/Vha68-1/VhaSFD/Ih/Tmem63/CG15270/COX8/CG4743/ATPsyndelta/SPoCk/stj/Vha36-1/PMCA/Nckx30C/Mid1/ATPsynG/COX7C/Vha55/NaPi-III/nAChRbeta1/Vha44/CG6574/sei/nAChRalpha2/ZnT49B/Eaat2/SK/CG33181…
	BP	generation of precursor metabolites and energy	GO:0006091	77/830	216/12175	5.25963e-36	1.33069e-32	1.03366e-32	Cyt-c1/Gapdh1/GC1/CG14757/blw/COX4/ATPsynF/Ald1/ATPsynbeta/CG5214/COX5A/Pfk/SdhD/Hex-A/SdhC/ND-B14.5B/ND-18/Chchd2/ND-49/Tpi/ND-19/ND-20/SdhA/ND-75/COX5B/Mdh1/Eno/bsf/Pgk/RFeSP/sun/UQCR-Q/ND-B14.5A/kdn/levy/ATPsynO/ND-42/ND-B22/PyK/CG7766/ND-B17.2/SdhB/Gapdh2/Cyt-c-p/ND-23/CG5028/COX7A/ND-B17/Idh3b/ND-13B/Pglym78/Idh3a/mAcon1/Atg3/UQCR-C2/sgg/Actbeta/ND-51/Gpo1/ND-24/AGBE/Irp-1B/Oscillin/CG6115/M…
	BP	cellular respiration	GO:0045333	53/830	128/12175	8.57786e-29	5.4255e-26	4.21444e-26	Cyt-c1/GC1/CG14757/COX4/ATPsynF/ATPsynbeta/CG5214/COX5A/SdhD/SdhC/ND-B14.5B/Chchd2/ND-49/ND-19/ND-20/SdhA/ND-75/COX5B/Mdh1/bsf/RFeSP/sun/UQCR-Q/ND-B14.5A/kdn/levy/ATPsynO/ND-42/ND-B22/ND-B17.2/SdhB/Cyt-c-p/ND-23/CG5028/COX7A/ND-B17/Idh3b/ND-13B/Idh3a/mAcon1/UQCR-C2/ND-51/Gpo1/ND-24/Irp-1B/CG6115/Mdh2/ND-ASHI/COX7C/Scsalpha1/Fum1/ScsbetaA/AIF
3	CC	ribosomal subunit	GO:0044391	27/344	174/12100	5.01852e-13	1.73641e-10	1.39462e-10	CG11700/mRpL23/RpL38/RpL15/RpL36/RpS5b/RpL37A/RpL39/RpS25/RpS26/RpS27A/mRpS9/RpS29/RpS30/mRpS7/bonsai/mRpS10/RpLP1/RpL10/mRpL54/RpS20/RpS10b/mRpL22/RpS15/RpS14a/RpL27A/RpL36A
	CC	transferase complex	GO:1990234	32/344	481/12100	6.85563e-06	0.000395341	0.000317524	lncRNA:roX2/Ubr1/Ost48/Yippee/PhKgamma/EloB/Pa1/Rep/Der-1/Sf3b5/qless/fzr/TfIIFbeta/SkpA/Stt3A/Pi3K21B/Socs36E/CG4911/cerv/Fsn/Taf10/phyl/KLHL18/CG33774/CG15237/wds/Naa30A/Dad1/l(3)73Ah/Roc1a/Dpy-30L1/vih
	MF	structural constituent of ribosome	GO:0003735	27/329	271/12049	5.94293e-09	2.10974e-06	1.93927e-06	CG11700/mRpL23/RpL38/RpL15/RpL36/RpS5b/RpL37A/RpL39/RpS25/RpS26/RpS27A/mRpS9/RpS29/RpS30/mRpS7/bonsai/mRpS10/RpLP1/RpL10/mRpL54/RpS20/RpS10b/mRpL22/RpS15/RpS14a/RpL27A/RpL36A
	MF	ubiquitin-like protein ligase activity	GO:0061659	14/329	149/12049	5.68195e-05	0.0100855	0.00927055	Pli/Ubr1/CG13605/Prp19/cerv/CG7694/Cbl/CG5087/Su(dx)/mib2/CG3356/CG14435/Roc1a/ctrip
	BP	cytoplasmic translation	GO:0002181	21/344	135/12175	1.78769e-10	3.57537e-07	3.13315e-07	Pink1/RpL38/RpL15/RpL36/RpS5b/RpL37A/RpL39/RpS25/RpS26/RpS27A/RpS29/RpS30/RpLP1/RpL10/RpS20/RpS10b/RpS15/eIF2beta/RpS14a/RpL27A/RpL36A
	BP	protein catabolic process	GO:0030163	34/344	374/12175	1.64522e-09	9.50963e-07	8.33344e-07	CG11700/Pink1/Prosalpha4/CG7058/Ubr1/CG3061/Rpn9/Rpn10/EloB/DUBAI/Der-1/fzr/RpS27A/Cp1/SkpA/Rpn11/CG13605/Socs36E/CG4911/Fsn/phyl/Usp15-31/Cbl/CG5087/Su(dx)/Rpt4/wds/CG3356/Ubi-p63E/Roc1a/Faf2/ctrip/vih/Prosbeta4
4	CC	synapse	GO:0045202	22/128	306/12100	9.2077e-13	9.11563e-11	5.81539e-11	Dop1R2/dysc/Rab27/Rdl/scrib/dlg1/Rim/slo/g/pum/Rgk1/cpx/brp/Fas2/cac/Ten-a/unc-13/Esyt2/GluClalpha/Abp1/Tomosyn/Fife
	CC	neuron projection	GO:0043005	23/128	453/12100	3.19317e-10	1.58062e-08	1.00837e-08	Pka-C1/crb/dysc/rad/Rdl/Oamb/pyd/dlg1/sNPF/slo/g/DIP-kappa/Tmc/pum/dpr8/cpx/Fas2/unc-13/Lis-1/GluClalpha/dpr6/Abp1/Unc-76
	MF	signaling receptor activity	GO:0038023	14/129	399/12049	9.26524e-05	0.00532751	0.00419374	Dop1R2/Rdl/Oamb/rk/Hr51/Dh44-R2/fz/Dh44-R1/arr/ftz-f1/Octbeta1R/GluClalpha/Dop2R/Octbeta3R
	MF	syntaxin binding	GO:0019905	4/129	26/12049	0.000156175	0.00718406	0.00565519	Sytalpha/cpx/unc-13/Tomosyn
	BP	chemical synaptic transmission	GO:0007268	23/134	314/12175	4.29958e-13	2.47152e-10	1.72406e-10	Pka-C1/Plc21C/dysc/Rdl/Oamb/dlg1/Rim/slo/pum/Sytalpha/Slob/cpo/cpx/brp/Fas2/Sh/cac/Ten-a/unc-13/Esyt2/GluClalpha/Tomosyn/Fife
	BP	cell junction organization	GO:0034330	21/134	367/12175	5.09106e-10	1.09749e-07	7.65573e-08	crb/dysc/scrib/pyd/dlg1/slo/DIP-kappa/pum/dpr8/cpx/brp/Fas2/Octbeta1R/cac/sdt/Ten-a/unc-13/dpr6/Abp1/l(3)neo38/Fife
	BP	learning or memory	GO:0007611	14/134	165/12175	3.39272e-09	4.61619e-07	3.22011e-07	14-3-3zeta/Pka-C1/rad/Rdl/Oamb/scrib/pum/arr/Rgk1/brp/Fas2/Sh/Dop2R/Tomosyn
5	CC	heterotrimeric G-protein complex	GO:0005834	3/89	13/12100	0.000104309	0.00535453	0.00464816	Ggamma30A/Galphaq/Gbeta13F
	MF	calmodulin binding	GO:0005516	4/90	40/12049	0.000216601	0.0470024	0.0414962	rdgC/igl/Pde1c/CanB
	BP	neuron projection development	GO:0031175	17/93	474/12175	9.11875e-08	2.70466e-05	2.09301e-05	ab/fru/rut/dnc/kuz/Smox/chic/Sema1a/cv-c/Mical/stai/comm/tsr/trio/Galphaq/ap/Toll-7
	BP	G protein-coupled receptor signaling pathway	GO:0007186	11/93	230/12175	1.3458e-06	0.000118438	9.16534e-05	hec/rut/Lgr3/dnc/Ggamma30A/rdgC/rdgA/DopEcR/Galphaq/Gbeta13F/mGluR
	BP	response to oxygen-containing compound	GO:1901700	13/93	354/12175	2.70577e-06	0.000222211	0.000171959	Pka-R1/Bx/rut/dnc/Smox/Ggamma30A/DopEcR/Galphaq/Hr38/CycG/rl/HDAC4/wdb

## Sheet: Cluster 1
source	term_name	term_id	GeneRatio	BgRatio	pvalue	p.adjust	qvalue	geneID
GO:MF	cell adhesion molecule binding	GO:0050839	12/254	66/12049	1.06603e-08	3.69911e-06	3.08586e-06	plum/Fas3/CadN/fred/stan/Dscam3/CadN2/CG44153/siz/Dscam2/cno/CG2082
GO:MF	calcium ion binding	GO:0005509	17/254	202/12049	1.26475e-06	0.000219434	0.000183056	Cnx99A/CadN/Sytbeta/stan/sli/Lrp4/Cbp53E/sqh/NUCB1/Cad87A/norpA/CadN2/Calr/AnxB11/Frq2/Dgk/Calx
GO:MF	GTPase regulator activity	GO:0030695	14/254	162/12049	8.22226e-06	0.000713281	0.000595032	RapGAP1/tbc/Epac/RhoGEF3/Cdep/Nf1/Evi5/siz/Asap/Rlip/CG1695/Gdi/CG3703/Tbc1d15-17
GO:MF	nucleoside-triphosphatase regulator activity	GO:0060589	14/254	162/12049	8.22226e-06	0.000713281	0.000595032	RapGAP1/tbc/Epac/RhoGEF3/Cdep/Nf1/Evi5/siz/Asap/Rlip/CG1695/Gdi/CG3703/Tbc1d15-17
GO:MF	GTPase activator activity	GO:0005096	13/254	157/12049	2.73782e-05	0.00190005	0.00158506	RapGAP1/tbc/Epac/RhoGEF3/Cdep/Nf1/Evi5/siz/Asap/Rlip/CG1695/CG3703/Tbc1d15-17
GO:MF	enzyme regulator activity	GO:0030234	22/254	427/12049	0.000101944	0.0058844	0.00490887	jeb/RapGAP1/tbc/Epac/Drep1/7B2/mats/RhoGEF3/Cdep/Ras85D/Nf1/Evi5/siz/mnb/Asap/Rlip/MRG15/CG1695/Gdi/CG3703/Oda/Tbc1d15-17
GO:MF	cadherin binding	GO:0045296	4/254	13/12049	0.000118705	0.0058844	0.00490887	CadN/CadN2/siz/CG2082
GO:MF	phosphotransferase activity, alcohol group as acceptor	GO:0016773	17/254	294/12049	0.000165262	0.00716823	0.00597987	CG8311/par-1/CG31145/Eip63E/Dyrk3/Ire1/Sik3/CASK/mnb/hep/Dyrk2/fwd/Ror/MAPk-Ak2/Ddr/Wnk/Dgk
GO:MF	protein kinase activity	GO:0004672	14/254	219/12049	0.000224905	0.00834326	0.0069601	par-1/CG31145/Eip63E/Dyrk3/Ire1/Sik3/CASK/mnb/hep/Dyrk2/Ror/MAPk-Ak2/Ddr/Wnk
GO:MF	neuropeptide receptor activity	GO:0008188	6/254	43/12049	0.000262162	0.00834326	0.0069601	PK2-R1/Pdfr/AstA-R1/MsR1/NPFR/AstC-R2
GO:MF	transmembrane signaling receptor activity	GO:0004888	18/254	335/12049	0.000264484	0.00834326	0.0069601	fra/stan/PK2-R1/Pdfr/nAChRalpha3/klg/AstA-R1/Ptp99A/MsR1/CG44153/fz2/Ror/5-HT2B/Ddr/NPFR/AstC-R2/Ptp10D/nAChRalpha7
GO:MF	G protein-coupled peptide receptor activity	GO:0008528	6/254	46/12049	0.000382097	0.0102941	0.00858754	PK2-R1/Pdfr/AstA-R1/MsR1/NPFR/AstC-R2
GO:MF	kinase activity	GO:0016301	17/254	316/12049	0.000385659	0.0102941	0.00858754	CG8311/par-1/CG31145/Eip63E/Dyrk3/Ire1/Sik3/CASK/mnb/hep/Dyrk2/fwd/Ror/MAPk-Ak2/Ddr/Wnk/Dgk
GO:MF	phosphoric diester hydrolase activity	GO:0008081	5/254	31/12049	0.000434175	0.0107613	0.0089773	CG32052/CG16717/Pde6/Pde11/norpA
GO:MF	G protein-coupled receptor activity	GO:0004930	9/254	115/12049	0.000718257	0.0159663	0.0133194	stan/PK2-R1/Pdfr/AstA-R1/MsR1/CG44153/5-HT2B/NPFR/AstC-R2
GO:MF	signaling receptor activity	GO:0038023	19/254	399/12049	0.000799779	0.0159663	0.0133194	fra/stan/PK2-R1/Pdfr/nAChRalpha3/klg/AstA-R1/ATP6AP2/Ptp99A/MsR1/CG44153/fz2/Ror/5-HT2B/Ddr/NPFR/AstC-R2/Ptp10D/nAChRalpha7
GO:MF	molecular transducer activity	GO:0060089	19/254	399/12049	0.000799779	0.0159663	0.0133194	fra/stan/PK2-R1/Pdfr/nAChRalpha3/klg/AstA-R1/ATP6AP2/Ptp99A/MsR1/CG44153/fz2/Ror/5-HT2B/Ddr/NPFR/AstC-R2/Ptp10D/nAChRalpha7
GO:MF	peptide receptor activity	GO:0001653	6/254	53/12049	0.000828221	0.0159663	0.0133194	PK2-R1/Pdfr/AstA-R1/MsR1/NPFR/AstC-R2
GO:MF	protein serine/threonine kinase activity	GO:0004674	11/254	171/12049	0.0009971	0.0182102	0.0151913	par-1/CG31145/Eip63E/Dyrk3/Ire1/Sik3/CASK/mnb/Dyrk2/MAPk-Ak2/Wnk
GO:MF	peptide binding	GO:0042277	7/254	79/12049	0.00135684	0.0235411	0.0196384	CG3662/Pdfr/AstA-R1/CG2852/KdelR/NPFR/AstC-R2
GO:MF	amide binding	GO:0033218	8/254	103/12049	0.00148	0.0244552	0.020401	CG3662/Pdfr/AstA-R1/CG2852/KdelR/Naa80/NPFR/AstC-R2
GO:MF	adenylate cyclase activity	GO:0004016	3/254	13/12049	0.00226403	0.0314247	0.026215	CG43373/Ac76E/Ac3
GO:MF	calcium-dependent phospholipid binding	GO:0005544	3/254	13/12049	0.00226403	0.0314247	0.026215	Sytbeta/AnxB11/Rph
GO:MF	cell adhesion mediator activity	GO:0098631	3/254	13/12049	0.00226403	0.0314247	0.026215	Dscam3/CG44153/Dscam2
GO:MF	molecular function inhibitor activity	GO:0140678	3/254	13/12049	0.00226403	0.0314247	0.026215	Drep1/Oda/Wnk
GO:MF	protein disulfide isomerase activity	GO:0003756	3/254	15/12049	0.00349134	0.0448702	0.0374315	prtp/CaBP1/ERp60
GO:MF	intramolecular oxidoreductase activity, transposing S-S bonds	GO:0016864	3/254	15/12049	0.00349134	0.0448702	0.0374315	prtp/CaBP1/ERp60
GO:MF	small GTPase binding	GO:0031267	7/254	94/12049	0.00367202	0.0455068	0.0379626	CG31064/Evi5/cdm/Rlip/Rph/Tbc1d15-17/cno
GO:BP	taxis	GO:0042330	31/282	341/12175	6.6625e-11	1.23723e-07	9.57296e-08	Sdc/jeb/fra/Fas3/CadN/stan/Ddc/capt/sli/Dscam3/beat-Ib/Pdfr/nvy/SCAR/sm/dally/ATP6AP2/Ptp99A/norpA/CadN2/beat-IIb/uzip/beat-IIa/beat-IIIb/CG44153/cdm/hep/fz2/Trim9/Dscam2/Ptp10D
GO:BP	axon guidance	GO:0007411	26/282	260/12175	3.21235e-10	2.98266e-07	2.30782e-07	Sdc/jeb/fra/Fas3/CadN/stan/capt/sli/Dscam3/beat-Ib/nvy/SCAR/sm/dally/Ptp99A/CadN2/beat-IIb/uzip/beat-IIa/beat-IIIb/CG44153/hep/fz2/Trim9/Dscam2/Ptp10D
GO:BP	neuron projection guidance	GO:0097485	26/282	268/12175	6.22814e-10	3.85522e-07	2.98295e-07	Sdc/jeb/fra/Fas3/CadN/stan/capt/sli/Dscam3/beat-Ib/nvy/SCAR/sm/dally/Ptp99A/CadN2/beat-IIb/uzip/beat-IIa/beat-IIIb/CG44153/hep/fz2/Trim9/Dscam2/Ptp10D
GO:BP	axon development	GO:0061564	29/282	338/12175	1.11777e-09	4.72513e-07	3.65604e-07	Sdc/jeb/fra/Fas3/CadN/stan/capt/sli/Dscam3/beat-Ib/nvy/SCAR/sm/dally/Pten/Ptp99A/CadN2/beat-IIb/uzip/beat-IIa/beat-IIIb/CG44153/hep/ben/fz2/Trim9/Dscam2/Rab5/Ptp10D
GO:BP	chemotaxis	GO:0006935	26/282	277/12175	1.27225e-09	4.72513e-07	3.65604e-07	Sdc/jeb/fra/Fas3/CadN/stan/capt/sli/Dscam3/beat-Ib/nvy/SCAR/sm/dally/Ptp99A/CadN2/beat-IIb/uzip/beat-IIa/beat-IIIb/CG44153/hep/fz2/Trim9/Dscam2/Ptp10D
GO:BP	axonogenesis	GO:0007409	28/282	325/12175	2.00872e-09	5.95273e-07	4.60589e-07	Sdc/jeb/fra/Fas3/CadN/stan/capt/sli/Dscam3/beat-Ib/nvy/SCAR/sm/dally/Ptp99A/CadN2/beat-IIb/uzip/beat-IIa/beat-IIIb/CG44153/hep/ben/fz2/Trim9/Dscam2/Rab5/Ptp10D
GO:BP	cell-cell adhesion	GO:0098609	18/282	136/12175	2.24389e-09	5.95273e-07	4.60589e-07	plum/Fas3/CadN/fred/stan/sli/Dscam3/beat-Ib/klg/par-1/Cad87A/CadN2/beat-IIb/beat-IIa/beat-IIIb/CG44153/Sec24CD/Dscam2
GO:BP	cell-cell adhesion via plasma-membrane adhesion molecules	GO:0098742	13/282	73/12175	1.04398e-08	2.42335e-06	1.87505e-06	Fas3/CadN/stan/Dscam3/beat-Ib/klg/Cad87A/CadN2/beat-IIb/beat-IIa/beat-IIIb/CG44153/Dscam2
GO:BP	developmental growth	GO:0048589	28/282	366/12175	2.74564e-08	3.86719e-06	2.99222e-06	Sdc/jeb/cic/CadN/stan/Ac76E/Syn/SCAR/dally/Rab11/par-1/Pten/RASSF8/pnut/Eip63E/sqh/Ras85D/Nf1/CadN2/CASK/dbo/mnb/hep/ben/Arp2/brat/Rab5/nwk
GO:BP	synapse organization	GO:0050808	25/282	299/12175	2.80126e-08	3.86719e-06	2.99222e-06	Sdc/jeb/DIP-delta/dpr18/stan/dpr13/Lrp4/Syn/klg/Rab11/par-1/ATP6AP2/dpr15/cmpy/Nf1/CASK/dbo/mnb/ben/fz2/dpr2/Arp2/brat/Frq2/nwk
GO:BP	cell adhesion	GO:0007155	21/282	216/12175	2.85903e-08	3.86719e-06	2.99222e-06	plum/Fas3/CadN/fred/stan/sli/Dscam3/beat-Ib/SCAR/klg/par-1/Pten/Cad87A/CadN2/beat-IIb/beat-IIa/beat-IIIb/CG44153/Sec24CD/tyn/Dscam2
GO:BP	eye development	GO:0001654	30/282	414/12175	2.91549e-08	3.86719e-06	2.99222e-06	jeb/cic/fra/CadN/fred/stan/capt/bnl/SCAR/dally/klg/Rab11/Mitf/Pten/ATP6AP2/RASSF8/exd/msi/Ras85D/norpA/CadN2/Ire1/sty/Arf79F/siz/hth/Lim1/Asap/Trim9/cno
GO:BP	sensory system development	GO:0048880	30/282	414/12175	2.91549e-08	3.86719e-06	2.99222e-06	jeb/cic/fra/CadN/fred/stan/capt/bnl/SCAR/dally/klg/Rab11/Mitf/Pten/ATP6AP2/RASSF8/exd/msi/Ras85D/norpA/CadN2/Ire1/sty/Arf79F/siz/hth/Lim1/Asap/Trim9/cno
GO:BP	visual system development	GO:0150063	30/282	414/12175	2.91549e-08	3.86719e-06	2.99222e-06	jeb/cic/fra/CadN/fred/stan/capt/bnl/SCAR/dally/klg/Rab11/Mitf/Pten/ATP6AP2/RASSF8/exd/msi/Ras85D/norpA/CadN2/Ire1/sty/Arf79F/siz/hth/Lim1/Asap/Trim9/cno
GO:BP	adult behavior	GO:0030534	18/282	163/12175	4.07861e-08	5.04932e-06	3.90688e-06	Syn/Agpat2/sm/shep/klg/hang/Nf1/norpA/MsR1/CASK/ben/Tbh/pxb/twz/cyc/FMRFa/vsg/nAChRalpha7
GO:BP	biological adhesion	GO:0022610	21/282	225/12175	5.82326e-08	6.75863e-06	5.22944e-06	plum/Fas3/CadN/fred/stan/sli/Dscam3/beat-Ib/SCAR/klg/par-1/Pten/Cad87A/CadN2/beat-IIb/beat-IIa/beat-IIIb/CG44153/Sec24CD/tyn/Dscam2
GO:BP	cell morphogenesis involved in differentiation	GO:0000904	32/282	478/12175	6.32019e-08	6.90388e-06	5.34183e-06	Sdc/jeb/fra/Fas3/CadN/stan/capt/sli/Dscam3/beat-Ib/nvy/SCAR/sm/dally/Ptp99A/sqh/Ras85D/CadN2/beat-IIb/Ire1/uzip/beat-IIa/beat-IIIb/CG44153/hep/tyn/ben/fz2/Trim9/Dscam2/Rab5/Ptp10D
GO:BP	secretion	GO:0046903	22/282	250/12175	8.01254e-08	7.52552e-06	5.82282e-06	IA-2/Sytbeta/tbc/Syn/7B2/Rab11/NFAT/cmpy/Arf79F/CASK/Sec24CD/bai/unc-13-4A/p24-1/Dh44/Gdi/Syx13/Syx6/Rph/Frq2/cm/rho-5
GO:BP	cell morphogenesis involved in neuron differentiation	GO:0048667	30/282	434/12175	8.34934e-08	7.52552e-06	5.82282e-06	Sdc/jeb/fra/Fas3/CadN/stan/capt/sli/Dscam3/beat-Ib/nvy/SCAR/sm/dally/Ptp99A/Ras85D/CadN2/beat-IIb/Ire1/uzip/beat-IIa/beat-IIIb/CG44153/hep/ben/fz2/Trim9/Dscam2/Rab5/Ptp10D
GO:BP	G protein-coupled receptor signaling pathway	GO:0007186	21/282	230/12175	8.50721e-08	7.52552e-06	5.82282e-06	stan/CG43373/Ac76E/PK2-R1/Pdfr/7B2/rdgB/AstA-R1/Nplp1/hang/Ac3/norpA/MsR1/CG32638/Tbh/Dh44/5-HT2B/FMRFa/Dgk/NPFR/AstC-R2
GO:BP	compound eye development	GO:0048749	28/282	386/12175	8.51028e-08	7.52552e-06	5.82282e-06	jeb/fra/CadN/fred/stan/capt/bnl/SCAR/dally/klg/Rab11/Mitf/Pten/ATP6AP2/RASSF8/msi/Ras85D/norpA/CadN2/Ire1/sty/Arf79F/siz/hth/Lim1/Asap/Trim9/cno
GO:BP	cell projection morphogenesis	GO:0048858	30/282	441/12175	1.18683e-07	9.58239e-06	7.41431e-06	Sdc/jeb/fra/Fas3/CadN/stan/capt/sli/Dscam3/beat-Ib/bnl/nvy/SCAR/sm/dally/Ptp99A/CadN2/beat-IIb/Ire1/uzip/beat-IIa/beat-IIIb/CG44153/hep/ben/fz2/Trim9/Dscam2/Rab5/Ptp10D
GO:BP	plasma membrane bounded cell projection morphogenesis	GO:0120039	30/282	441/12175	1.18683e-07	9.58239e-06	7.41431e-06	Sdc/jeb/fra/Fas3/CadN/stan/capt/sli/Dscam3/beat-Ib/bnl/nvy/SCAR/sm/dally/Ptp99A/CadN2/beat-IIb/Ire1/uzip/beat-IIa/beat-IIIb/CG44153/hep/ben/fz2/Trim9/Dscam2/Rab5/Ptp10D
GO:BP	vesicle-mediated transport in synapse	GO:0099003	14/282	107/12175	1.63798e-07	1.20803e-05	9.34704e-06	Sytbeta/Syn/Rab11/NFAT/Arf79F/CASK/mnb/unc-13-4A/Syx13/Syx6/brat/Rph/Rab5/Arl1
GO:BP	synaptic vesicle cycle	GO:0099504	14/282	107/12175	1.63798e-07	1.20803e-05	9.34704e-06	Sytbeta/Syn/Rab11/NFAT/Arf79F/CASK/mnb/unc-13-4A/Syx13/Syx6/brat/Rph/Rab5/Arl1
GO:BP	neuron projection development	GO:0031175	31/282	474/12175	1.73895e-07	1.20803e-05	9.34704e-06	Sdc/jeb/fra/Fas3/CadN/stan/capt/sli/Dscam3/beat-Ib/nvy/SCAR/sm/dally/Pten/Ptp99A/CadN2/beat-IIb/Ire1/uzip/beat-IIa/beat-IIIb/CG44153/hep/ben/fz2/Ror/Trim9/Dscam2/Rab5/Ptp10D
GO:BP	cell part morphogenesis	GO:0032990	30/282	449/12175	1.75642e-07	1.20803e-05	9.34704e-06	Sdc/jeb/fra/Fas3/CadN/stan/capt/sli/Dscam3/beat-Ib/bnl/nvy/SCAR/sm/dally/Ptp99A/CadN2/beat-IIb/Ire1/uzip/beat-IIa/beat-IIIb/CG44153/hep/ben/fz2/Trim9/Dscam2/Rab5/Ptp10D
GO:BP	growth	GO:0040007	29/282	429/12175	2.23517e-07	1.4824e-05	1.147e-05	Sdc/jeb/cic/CadN/stan/Ac76E/Syn/SCAR/dally/Rab11/par-1/Pten/RASSF8/pnut/Eip63E/sqh/cmpy/Ras85D/Nf1/CadN2/CASK/dbo/mnb/hep/ben/Arp2/brat/Rab5/nwk
GO:BP	neuron recognition	GO:0008038	14/282	112/12175	2.91722e-07	1.86803e-05	1.44537e-05	fra/Fas3/CadN/stan/sli/Dscam3/hig/SCAR/Ptp99A/uzip/CG44153/fz2/Trim9/Dscam2
GO:BP	secretion by cell	GO:0032940	20/282	228/12175	3.3448e-07	2.07043e-05	1.60198e-05	Sytbeta/tbc/Syn/7B2/Rab11/NFAT/cmpy/Arf79F/CASK/Sec24CD/bai/unc-13-4A/p24-1/Gdi/Syx13/Syx6/Rph/Frq2/cm/rho-5
GO:BP	neuron projection morphogenesis	GO:0048812	29/282	439/12175	3.62424e-07	2.17104e-05	1.67983e-05	Sdc/jeb/fra/Fas3/CadN/stan/capt/sli/Dscam3/beat-Ib/nvy/SCAR/sm/dally/Ptp99A/CadN2/beat-IIb/Ire1/uzip/beat-IIa/beat-IIIb/CG44153/hep/ben/fz2/Trim9/Dscam2/Rab5/Ptp10D
GO:BP	cell junction organization	GO:0034330	26/282	367/12175	3.99951e-07	2.32096e-05	1.79583e-05	Sdc/jeb/DIP-delta/dpr18/stan/dpr13/Lrp4/Syn/klg/Rab11/par-1/Pten/ATP6AP2/dpr15/cmpy/Nf1/CASK/dbo/mnb/ben/fz2/dpr2/Arp2/brat/Frq2/nwk
GO:BP	cell recognition	GO:0008037	14/282	117/12175	5.03395e-07	2.83274e-05	2.19182e-05	fra/Fas3/CadN/stan/sli/Dscam3/hig/SCAR/Ptp99A/uzip/CG44153/fz2/Trim9/Dscam2
GO:BP	export from cell	GO:0140352	20/282	236/12175	5.81515e-07	3.12089e-05	2.41477e-05	Sytbeta/tbc/Syn/7B2/Rab11/NFAT/cmpy/Arf79F/CASK/Sec24CD/bai/unc-13-4A/p24-1/Gdi/Syx13/Syx6/Rph/Frq2/cm/rho-5
GO:BP	homophilic cell adhesion via plasma membrane adhesion molecules	GO:0007156	9/282	44/12175	5.88213e-07	3.12089e-05	2.41477e-05	Fas3/CadN/stan/Dscam3/klg/Cad87A/CadN2/CG44153/Dscam2
GO:BP	signal release	GO:0023061	15/282	142/12175	9.998e-07	5.1573e-05	3.99043e-05	Sytbeta/Syn/7B2/NFAT/cmpy/Arf79F/CASK/bai/unc-13-4A/p24-1/Gdi/Syx13/Syx6/Rph/Frq2
GO:BP	neuropeptide signaling pathway	GO:0007218	10/282	61/12175	1.20445e-06	6.04505e-05	4.67732e-05	PK2-R1/Pdfr/7B2/AstA-R1/Nplp1/MsR1/Dh44/FMRFa/NPFR/AstC-R2
GO:BP	regulation of neurotransmitter levels	GO:0001505	13/282	112/12175	1.83547e-06	8.96965e-05	6.94021e-05	Sytbeta/Syn/Ace/NFAT/Arf79F/CASK/unc-13-4A/Tbh/Gdi/Syx13/Syx6/Rph/Frq2
GO:BP	eye morphogenesis	GO:0048592	23/282	331/12175	2.67272e-06	0.000124081	9.60071e-05	jeb/cic/CadN/fred/stan/capt/bnl/SCAR/klg/Rab11/Mitf/Pten/msi/Ras85D/norpA/CadN2/Ire1/sty/Arf79F/siz/hth/Asap/cno
GO:BP	sensory organ morphogenesis	GO:0090596	23/282	331/12175	2.67272e-06	0.000124081	9.60071e-05	jeb/cic/CadN/fred/stan/capt/bnl/SCAR/klg/Rab11/Mitf/Pten/msi/Ras85D/norpA/CadN2/Ire1/sty/Arf79F/siz/hth/Asap/cno
GO:BP	regulation of locomotion	GO:0040012	13/282	118/12175	3.32018e-06	0.00015038	0.000116356	fra/stan/sli/bnl/par-1/Pten/sqh/Evi5/CASK/hep/Tbh/Trim9/Arl1
GO:BP	compound eye morphogenesis	GO:0001745	22/282	313/12175	3.68531e-06	0.000162943	0.000126076	jeb/CadN/fred/stan/capt/bnl/SCAR/klg/Rab11/Mitf/Pten/msi/Ras85D/norpA/CadN2/Ire1/sty/Arf79F/siz/hth/Asap/cno
GO:BP	regulation of transport	GO:0051049	21/282	299/12175	6.2388e-06	0.000269429	0.000208469	IA-2/Cnx99A/Sytbeta/7B2/Rab11/NFAT/Pde6/prtp/CaBP1/cmpy/norpA/Arf79F/CASK/Sec24CD/mnb/brat/Rab5/Frq2/Wnk/Arl1/rho-5
GO:BP	motor neuron axon guidance	GO:0008045	10/282	74/12175	7.36013e-06	0.000310631	0.000240349	Sdc/fra/beat-Ib/dally/Ptp99A/beat-IIb/beat-IIa/beat-IIIb/fz2/Ptp10D
GO:BP	locomotory behavior	GO:0007626	16/282	191/12175	9.28099e-06	0.000382996	0.000296341	Pdfr/shep/Ac3/Nf1/norpA/MsR1/CASK/ben/Tbh/Dh44/Fer2LCH/Trim9/twz/cyc/FMRFa/nAChRalpha7
GO:BP	protein transport	GO:0015031	27/282	467/12175	1.14194e-05	0.000460994	0.000356691	tbc/Rab11/Spase22-23/Pex13/cmpy/Evi5/Spase25/Arf79F/AP-2sigma/Sec24CD/bai/cdm/p24-1/CG1695/Gdi/Syx13/Ist1/CG3703/boca/Syx6/Rph/Rab5/Sgt/Tbc1d15-17/cm/Arl1/rho-5
GO:BP	chemical synaptic transmission	GO:0007268	21/282	314/12175	1.32154e-05	0.000511272	0.000395593	jeb/Sytbeta/Syn/Cbp53E/nAChRalpha3/Ace/NFAT/Pten/Arf79F/CASK/cdm/unc-13-4A/Sap47/Gdi/Syx13/Syx6/Rph/Frq2/FMRFa/nwk/nAChRalpha7
GO:BP	anterograde trans-synaptic signaling	GO:0098916	21/282	314/12175	1.32154e-05	0.000511272	0.000395593	jeb/Sytbeta/Syn/Cbp53E/nAChRalpha3/Ace/NFAT/Pten/Arf79F/CASK/cdm/unc-13-4A/Sap47/Gdi/Syx13/Syx6/Rph/Frq2/FMRFa/nwk/nAChRalpha7
GO:BP	trans-synaptic signaling	GO:0099537	21/282	316/12175	1.45484e-05	0.000551355	0.000426608	jeb/Sytbeta/Syn/Cbp53E/nAChRalpha3/Ace/NFAT/Pten/Arf79F/CASK/cdm/unc-13-4A/Sap47/Gdi/Syx13/Syx6/Rph/Frq2/FMRFa/nwk/nAChRalpha7
GO:BP	synaptic signaling	GO:0099536	21/282	324/12175	2.1179e-05	0.00075713	0.000585825	jeb/Sytbeta/Syn/Cbp53E/nAChRalpha3/Ace/NFAT/Pten/Arf79F/CASK/cdm/unc-13-4A/Sap47/Gdi/Syx13/Syx6/Rph/Frq2/FMRFa/nwk/nAChRalpha7
GO:BP	neurotransmitter secretion	GO:0007269	11/282	101/12175	2.12108e-05	0.00075713	0.000585825	Sytbeta/Syn/NFAT/Arf79F/CASK/unc-13-4A/Gdi/Syx13/Syx6/Rph/Frq2
GO:BP	signal release from synapse	GO:0099643	11/282	101/12175	2.12108e-05	0.00075713	0.000585825	Sytbeta/Syn/NFAT/Arf79F/CASK/unc-13-4A/Gdi/Syx13/Syx6/Rph/Frq2
GO:BP	intracellular protein transport	GO:0006886	22/282	350/12175	2.1609e-05	0.00075713	0.000585825	tbc/Spase22-23/Pex13/Evi5/Spase25/Arf79F/AP-2sigma/Sec24CD/bai/cdm/p24-1/CG1695/Syx13/CG3703/boca/Syx6/Rph/Rab5/Sgt/Tbc1d15-17/cm/Arl1
GO:BP	establishment of protein localization	GO:0045184	27/282	488/12175	2.50074e-05	0.000841228	0.000650895	tbc/Rab11/Spase22-23/Pex13/cmpy/Evi5/Spase25/Arf79F/AP-2sigma/Sec24CD/bai/cdm/p24-1/CG1695/Gdi/Syx13/Ist1/CG3703/boca/Syx6/Rph/Rab5/Sgt/Tbc1d15-17/cm/Arl1/rho-5
GO:BP	regulation of developmental growth	GO:0048638	17/282	230/12175	2.53137e-05	0.000841228	0.000650895	Sdc/cic/CadN/stan/Ac76E/dally/Pten/RASSF8/pnut/Ras85D/Nf1/CASK/dbo/mnb/Arp2/brat/nwk
GO:BP	regulation of vesicle-mediated transport	GO:0060627	12/282	122/12175	2.53682e-05	0.000841228	0.000650895	Sytbeta/Rab11/NFAT/prtp/CaBP1/norpA/Arf79F/CASK/mnb/brat/Rab5/Arl1
GO:BP	ommatidial rotation	GO:0016318	6/282	27/12175	2.87647e-05	0.000937123	0.000725093	CadN/stan/Ras85D/CadN2/sty/cno
GO:BP	synaptic vesicle endocytosis	GO:0048488	7/282	40/12175	3.21439e-05	0.00101171	0.000782808	Rab11/Arf79F/CASK/mnb/brat/Rab5/Arl1
GO:BP	presynaptic endocytosis	GO:0140238	7/282	40/12175	3.21439e-05	0.00101171	0.000782808	Rab11/Arf79F/CASK/mnb/brat/Rab5/Arl1
GO:BP	behavioral response to ethanol	GO:0048149	8/282	55/12175	3.55107e-05	0.00109906	0.000850389	Syn/Agpat2/klg/hang/CASK/Tbh/pxb/vsg
GO:BP	establishment of planar polarity	GO:0001736	10/282	89/12175	3.83858e-05	0.00114972	0.000889585	CadN/fred/stan/par-1/Pten/ATP6AP2/Ras85D/CadN2/sty/cno
GO:BP	establishment of tissue polarity	GO:0007164	10/282	89/12175	3.83858e-05	0.00114972	0.000889585	CadN/fred/stan/par-1/Pten/ATP6AP2/Ras85D/CadN2/sty/cno
GO:BP	photoreceptor cell development	GO:0042461	11/282	108/12175	3.98974e-05	0.00117602	0.000909941	jeb/CadN/stan/capt/Rab11/Pten/Ras85D/CadN2/Ire1/sty/ben
GO:BP	synaptic vesicle exocytosis	GO:0016079	8/282	57/12175	4.63014e-05	0.00133081	0.0010297	Sytbeta/Syn/NFAT/CASK/unc-13-4A/Syx13/Syx6/Rph
GO:BP	adult locomotory behavior	GO:0008344	10/282	91/12175	4.65818e-05	0.00133081	0.0010297	shep/Nf1/norpA/MsR1/CASK/ben/Tbh/twz/FMRFa/nAChRalpha7
GO:BP	regulation of anatomical structure morphogenesis	GO:0022603	14/282	177/12175	6.34422e-05	0.00178503	0.00138116	CadN/fred/stan/capt/SCAR/Rab11/par-1/zld/Pten/Sec24CD/tyn/fz2/Trim9/cno
GO:BP	activation of GTPase activity	GO:0090630	6/282	32/12175	7.98913e-05	0.0022143	0.0017133	RapGAP1/tbc/Evi5/CG1695/CG3703/Tbc1d15-17
GO:BP	synaptic vesicle recycling	GO:0036465	7/282	46/12175	8.19559e-05	0.00223812	0.00173173	Rab11/Arf79F/CASK/mnb/brat/Rab5/Arl1
GO:BP	neuromuscular junction development	GO:0007528	14/282	182/12175	8.57811e-05	0.00230863	0.00178629	Sdc/jeb/Syn/par-1/cmpy/Nf1/CASK/dbo/mnb/ben/Arp2/brat/Frq2/nwk
GO:BP	memory	GO:0007613	11/282	118/12175	9.02081e-05	0.00239309	0.00185164	Ddc/Syn/klg/Phm/ATP6AP2/Nf1/CASK/Tbh/pxb/vsg/Ptp10D
GO:BP	morphogenesis of a polarized epithelium	GO:0001738	10/282	99/12175	9.59767e-05	0.0024754	0.00191532	CadN/fred/stan/par-1/Pten/ATP6AP2/Ras85D/CadN2/sty/cno
GO:BP	exocytosis	GO:0006887	10/282	99/12175	9.59767e-05	0.0024754	0.00191532	Sytbeta/Syn/Rab11/NFAT/CASK/unc-13-4A/Syx13/Syx6/Rph/cm
GO:BP	synaptic assembly at neuromuscular junction	GO:0051124	12/282	140/12175	9.84423e-05	0.00250421	0.00193762	Sdc/jeb/Syn/par-1/Nf1/CASK/dbo/mnb/ben/Arp2/brat/nwk
GO:BP	regulated exocytosis	GO:0045055	8/282	64/12175	0.00010782	0.00270569	0.00209351	Sytbeta/Syn/NFAT/CASK/unc-13-4A/Syx13/Syx6/Rph
GO:BP	learning or memory	GO:0007611	13/282	165/12175	0.000120337	0.00297954	0.0023054	Ddc/Syn/klg/Phm/ATP6AP2/Nf1/CASK/mnb/Tbh/Sap47/pxb/vsg/Ptp10D
GO:BP	cognition	GO:0050890	13/282	166/12175	0.000127904	0.00312522	0.00241812	Ddc/Syn/klg/Phm/ATP6AP2/Nf1/CASK/mnb/Tbh/Sap47/pxb/vsg/Ptp10D
GO:BP	positive regulation of GTPase activity	GO:0043547	8/282	66/12175	0.000134431	0.00323786	0.00250527	RapGAP1/tbc/Evi5/Asap/Rlip/CG1695/CG3703/Tbc1d15-17
GO:BP	regulation of cell migration	GO:0030334	9/282	84/12175	0.000136	0.00323786	0.00250527	fra/sli/bnl/par-1/Pten/sqh/Evi5/hep/Arl1
GO:BP	protein phosphorylation	GO:0006468	20/282	342/12175	0.000138679	0.00325982	0.00252227	Hsp67Bc/bnl/mats/par-1/CG31145/Pten/svr/Eip63E/Dyrk3/Ire1/sty/Sik3/CASK/mnb/hep/Dyrk2/Ror/MAPk-Ak2/Ddr/Wnk
GO:BP	homeostatic process	GO:0042592	24/282	455/12175	0.000149378	0.00346744	0.00268291	VhaAC45/Cnx99A/capt/Pdfr/Cbp53E/CG7484/Rbcn-3A/Pten/sqh/CG10413/alc/Ras85D/norpA/Sik3/Arf79F/Pgi/hep/Fer2LCH/fz2/CG10470/CG31030/Xbp1/Wnk/FMRFa
GO:BP	synapse assembly	GO:0007416	13/282	169/12175	0.000153118	0.00351036	0.00271612	Sdc/jeb/stan/Syn/par-1/Nf1/CASK/dbo/mnb/ben/Arp2/brat/nwk
GO:BP	cell growth	GO:0016049	12/282	147/12175	0.000156837	0.00355178	0.00274817	cic/CadN/stan/SCAR/Rab11/Pten/sqh/cmpy/Nf1/CadN2/hep/Rab5
GO:BP	regulation of cell motility	GO:2000145	9/282	88/12175	0.000194732	0.00435684	0.00337108	fra/sli/bnl/par-1/Pten/sqh/Evi5/hep/Arl1
GO:BP	neurotransmitter transport	GO:0006836	11/282	129/12175	0.000200385	0.00442994	0.00342764	Sytbeta/Syn/NFAT/Arf79F/CASK/unc-13-4A/Gdi/Syx13/Syx6/Rph/Frq2
GO:BP	response to ethanol	GO:0045471	8/282	70/12175	0.000203996	0.00443863	0.00343436	Syn/Agpat2/klg/hang/CASK/Tbh/pxb/vsg
GO:BP	formation of anatomical boundary	GO:0048859	7/282	53/12175	0.000205558	0.00443863	0.00343436	fra/sli/dally/Rab11/exd/sqh/hth
GO:BP	regulation of growth	GO:0040008	18/282	299/12175	0.000209506	0.00447188	0.00346009	Sdc/cic/CadN/stan/Ac76E/dally/Pten/RASSF8/pnut/cmpy/Ras85D/Nf1/CASK/dbo/mnb/Arp2/brat/nwk
GO:BP	compound eye photoreceptor development	GO:0042051	9/282	90/12175	0.000231211	0.00487908	0.00377516	jeb/CadN/stan/capt/Rab11/Pten/CadN2/Ire1/sty
GO:BP	phosphorylation	GO:0016310	22/282	412/12175	0.00023808	0.00496757	0.00384363	Hsp67Bc/bnl/mats/par-1/CG31145/Pten/svr/Eip63E/Dyrk3/Ire1/sty/Sik3/CASK/Pgi/mnb/hep/Dyrk2/Ror/MAPk-Ak2/Ddr/Wnk/Dgk
GO:BP	long-term memory	GO:0007616	8/282	72/12175	0.000248522	0.00512783	0.00396763	Ddc/klg/ATP6AP2/Nf1/CASK/pxb/vsg/Ptp10D
GO:BP	eye photoreceptor cell development	GO:0042462	9/282	93/12175	0.000296437	0.00604927	0.00468058	jeb/CadN/stan/capt/Rab11/Pten/CadN2/Ire1/sty
GO:BP	actin cytoskeleton organization	GO:0030036	18/282	308/12175	0.000301049	0.00607662	0.00470175	capt/CG15236/SCAR/Rab11/Pten/svr/RhoGEF3/Kank/sqh/CG43901/CG32982/siz/hep/tyn/fwd/Arp2/gukh/nwk
GO:BP	cAMP metabolic process	GO:0046058	4/282	15/12175	0.000314344	0.00627675	0.0048566	CG43373/Ac76E/Pde11/Ac3
GO:BP	regulation of GTPase activity	GO:0043087	9/282	95/12175	0.000347854	0.00687197	0.00531714	RapGAP1/tbc/Nf1/Evi5/Asap/Rlip/CG1695/CG3703/Tbc1d15-17
GO:BP	cell migration	GO:0016477	18/282	313/12175	0.000365625	0.00714701	0.00552995	Sdc/jeb/fra/sli/bnl/SCAR/dally/Rab11/par-1/Pten/sqh/Ras85D/Evi5/CASK/hep/fz2/Rab5/Arl1
GO:BP	regulation of cellular component movement	GO:0051270	10/282	118/12175	0.000408435	0.00790066	0.00611308	fra/stan/sli/bnl/par-1/Pten/sqh/Evi5/hep/Arl1
GO:BP	transmembrane receptor protein tyrosine kinase signaling pathway	GO:0007169	14/282	212/12175	0.000421454	0.00806845	0.00624291	jeb/cic/bnl/dally/Pten/Mvb12/Ras85D/sty/Sik3/hep/Ror/Ddr/Ptp10D/rho-5
GO:BP	regulation of anatomical structure size	GO:0090066	15/282	238/12175	0.000434822	0.00823943	0.00637521	CadN/stan/CG15236/SCAR/Phm/Pten/svr/Kank/sqh/CG10413/Ras85D/Sec24CD/Arp2/MAPk-Ak2/nwk
GO:BP	ion homeostasis	GO:0050801	12/282	165/12175	0.000456915	0.00849466	0.00657269	VhaAC45/Cnx99A/Pdfr/Cbp53E/Rbcn-3A/CG10413/norpA/Fer2LCH/CG10470/CG31030/Wnk/FMRFa
GO:BP	compound eye photoreceptor cell differentiation	GO:0001751	13/282	189/12175	0.00045744	0.00849466	0.00657269	jeb/CadN/stan/capt/klg/Rab11/Pten/msi/Ras85D/CadN2/Ire1/sty/hth
GO:BP	establishment or maintenance of cell polarity	GO:0007163	13/282	190/12175	0.000481064	0.00884491	0.00684369	CadN/stan/capt/orb/Rab11/par-1/alc/Ras85D/CadN2/sty/Sec24CD/Rab5/cno
GO:BP	formation of animal organ boundary	GO:0010160	6/282	44/12175	0.000493073	0.00897682	0.00694576	fra/sli/dally/Rab11/exd/hth
GO:BP	positive regulation of hydrolase activity	GO:0051345	9/282	100/12175	0.000509313	0.00915131	0.00708077	RapGAP1/tbc/7B2/Evi5/Asap/Rlip/CG1695/CG3703/Tbc1d15-17
GO:BP	actin filament-based process	GO:0030029	18/282	322/12175	0.000512513	0.00915131	0.00708077	capt/CG15236/SCAR/Rab11/Pten/svr/RhoGEF3/Kank/sqh/CG43901/CG32982/siz/hep/tyn/fwd/Arp2/gukh/nwk
GO:BP	photoreceptor cell differentiation	GO:0046530	14/282	217/12175	0.000532443	0.00941663	0.00728606	jeb/CadN/stan/capt/klg/Rab11/Pten/msi/Ras85D/CadN2/Ire1/sty/hth/ben
GO:BP	regulation of cell junction assembly	GO:1901888	10/282	123/12175	0.000568233	0.0099548	0.00770246	Sdc/stan/Pten/Nf1/CASK/dbo/mnb/Arp2/brat/nwk
GO:BP	regulation of secretion	GO:0051046	9/282	102/12175	0.000589105	0.010224	0.00791075	IA-2/Sytbeta/7B2/NFAT/cmpy/CASK/Sec24CD/Frq2/rho-5
GO:BP	endocytosis	GO:0006897	12/282	170/12175	0.000597571	0.0102749	0.00795015	Rab11/norpA/Arf79F/AP-2sigma/CASK/mnb/hep/Rlip/brat/Rab5/cm/Arl1
GO:BP	response to endoplasmic reticulum stress	GO:0034976	8/282	82/12175	0.000606392	0.0103309	0.00799348	Cnx99A/shep/Ire1/Calr/ERp60/Xbp1/Sgt/Calx
GO:BP	eye photoreceptor cell differentiation	GO:0001754	13/282	196/12175	0.000645639	0.0108996	0.00843347	jeb/CadN/stan/capt/klg/Rab11/Pten/msi/Ras85D/CadN2/Ire1/sty/hth
GO:BP	cyclic nucleotide metabolic process	GO:0009187	5/282	31/12175	0.000667011	0.0110604	0.00855794	CG43373/Ac76E/Pde6/Pde11/Ac3
GO:BP	dendrite self-avoidance	GO:0070593	4/282	18/12175	0.00066708	0.0110604	0.00855794	stan/Dscam3/CG44153/Dscam2
GO:BP	positive regulation of catalytic activity	GO:0043085	12/282	174/12175	0.000734797	0.0120754	0.00934325	RapGAP1/tbc/7B2/Nf1/Evi5/Asap/Rlip/Ror/CG1695/CG3703/Ddr/Tbc1d15-17
GO:BP	cell junction assembly	GO:0034329	14/282	225/12175	0.000761506	0.0124045	0.00959792	Sdc/jeb/stan/Syn/par-1/Pten/Nf1/CASK/dbo/mnb/ben/Arp2/brat/nwk
GO:BP	negative regulation of developmental process	GO:0051093	13/282	200/12175	0.000779912	0.0125939	0.00974444	cic/CadN/Ac76E/bnl/Pten/RASSF8/Ras85D/Nf1/norpA/sty/dbo/brat/nwk
GO:BP	enzyme linked receptor protein signaling pathway	GO:0007167	16/282	280/12175	0.000823915	0.013057	0.0101028	jeb/cic/bnl/dally/Pten/Nplp1/Mvb12/cmpy/Ras85D/sty/Sik3/hep/Ror/Ddr/Ptp10D/rho-5
GO:BP	salivary gland boundary specification	GO:0007432	4/282	19/12175	0.000829686	0.013057	0.0101028	fra/sli/exd/hth
GO:BP	peptidyl-threonine phosphorylation	GO:0018107	4/282	19/12175	0.000829686	0.013057	0.0101028	Dyrk3/Sik3/mnb/Dyrk2
GO:BP	regulation of cellular component size	GO:0032535	12/282	178/12175	0.000897473	0.0138884	0.0107461	CadN/stan/CG15236/SCAR/Pten/svr/Kank/CG10413/Ras85D/Arp2/MAPk-Ak2/nwk
GO:BP	tissue migration	GO:0090130	12/282	178/12175	0.000897473	0.0138884	0.0107461	Sdc/jeb/sli/bnl/dally/Rab11/par-1/sqh/Ras85D/CASK/hep/Rab5
GO:BP	axon extension	GO:0048675	6/282	50/12175	0.000988411	0.0151693	0.0117371	CadN/stan/SCAR/CadN2/hep/Rab5
GO:BP	regulation of catalytic activity	GO:0050790	17/282	313/12175	0.00100429	0.0152508	0.0118002	capt/RapGAP1/tbc/7B2/Pten/alc/Nf1/Evi5/sty/Asap/Rlip/Ror/CG1695/CG3703/Ddr/Tbc1d15-17/NPFR
GO:BP	axonal fasciculation	GO:0007413	4/282	20/12175	0.00101836	0.0152508	0.0118002	Fas3/CadN/SCAR/uzip
GO:BP	peptidyl-threonine modification	GO:0018210	4/282	20/12175	0.00101836	0.0152508	0.0118002	Dyrk3/Sik3/mnb/Dyrk2
GO:BP	endoplasmic reticulum to Golgi vesicle-mediated transport	GO:0006888	7/282	70/12175	0.00114434	0.0169608	0.0131233	Ykt6/Sec24CD/bai/p24-1/boca/KdelR/Arl1
GO:BP	chemical homeostasis	GO:0048878	16/282	289/12175	0.00115081	0.0169608	0.0131233	VhaAC45/Cnx99A/Pdfr/Cbp53E/Rbcn-3A/Pten/CG10413/norpA/Sik3/Pgi/hep/Fer2LCH/CG10470/CG31030/Wnk/FMRFa
GO:BP	fibroblast growth factor receptor signaling pathway	GO:0008543	5/282	35/12175	0.00118171	0.0170111	0.0131623	bnl/dally/Ras85D/sty/Ptp10D
GO:BP	cellular response to fibroblast growth factor stimulus	GO:0044344	5/282	35/12175	0.00118171	0.0170111	0.0131623	bnl/dally/Ras85D/sty/Ptp10D
GO:BP	response to fibroblast growth factor	GO:0071774	5/282	35/12175	0.00118171	0.0170111	0.0131623	bnl/dally/Ras85D/sty/Ptp10D
GO:BP	establishment of ommatidial planar polarity	GO:0042067	6/282	52/12175	0.00121837	0.017404	0.0134662	CadN/stan/Ras85D/CadN2/sty/cno
GO:BP	neuron projection fasciculation	GO:0106030	4/282	21/12175	0.00123526	0.0174903	0.013533	Fas3/CadN/SCAR/uzip
GO:BP	inorganic ion homeostasis	GO:0098771	11/282	160/12175	0.00124325	0.0174903	0.013533	VhaAC45/Cnx99A/Pdfr/Cbp53E/Rbcn-3A/CG10413/norpA/Fer2LCH/CG10470/CG31030/FMRFa
GO:BP	negative regulation of multicellular organismal process	GO:0051241	11/282	161/12175	0.00130762	0.0181212	0.0140212	cic/CadN/Ac76E/Pten/RASSF8/Nf1/sty/dbo/brat/FMRFa/nwk
GO:BP	cation homeostasis	GO:0055080	11/282	161/12175	0.00130762	0.0181212	0.0140212	VhaAC45/Cnx99A/Pdfr/Cbp53E/Rbcn-3A/CG10413/norpA/Fer2LCH/CG10470/CG31030/FMRFa
GO:BP	neuron projection extension	GO:1990138	6/282	53/12175	0.00134767	0.0185379	0.0143436	CadN/stan/SCAR/CadN2/hep/Rab5
GO:BP	ameboidal-type cell migration	GO:0001667	12/282	187/12175	0.00137544	0.0187809	0.0145316	Sdc/jeb/sli/bnl/dally/Rab11/par-1/sqh/Ras85D/CASK/hep/Rab5
GO:BP	regulation of plasma membrane bounded cell projection organization	GO:0120035	10/282	139/12175	0.00146058	0.0197938	0.0153154	fra/CadN/stan/SCAR/Pten/hep/fz2/Ror/Trim9/Arp2
GO:BP	regulation of animal organ morphogenesis	GO:2000027	4/282	22/12175	0.00148252	0.0197938	0.0153154	fred/par-1/Pten/cno
GO:BP	animal organ formation	GO:0048645	6/282	54/12175	0.00148718	0.0197938	0.0153154	fra/sli/dally/Rab11/exd/hth
GO:BP	developmental growth involved in morphogenesis	GO:0060560	8/282	94/12175	0.00149227	0.0197938	0.0153154	CadN/stan/SCAR/Rab11/sqh/CadN2/hep/Rab5
GO:BP	regulation of synapse assembly	GO:0051963	9/282	118/12175	0.00166874	0.0218501	0.0169064	Sdc/stan/Nf1/CASK/dbo/mnb/Arp2/brat/nwk
GO:BP	small GTPase mediated signal transduction	GO:0007264	11/282	166/12175	0.0016719	0.0218501	0.0169064	RapGAP1/Epac/Rab11/Cdep/Ras85D/Nf1/sty/Arf79F/siz/Rlip/Gdi
GO:BP	positive regulation of cellular component organization	GO:0051130	15/282	272/12175	0.00169336	0.0218501	0.0169064	Sdc/stan/CG15236/SCAR/Mitf/svr/norpA/Arf79F/CASK/Sec24CD/mnb/hep/Ror/Arp2/nwk
GO:BP	positive regulation of molecular function	GO:0044093	13/282	218/12175	0.00171038	0.0218501	0.0169064	RapGAP1/tbc/7B2/Nf1/Evi5/Asap/Rlip/Ror/CG1695/CG3703/Ddr/Tbc1d15-17/Wnk
GO:BP	Golgi vesicle transport	GO:0048193	10/282	142/12175	0.00171439	0.0218501	0.0169064	Rab11/Ykt6/Arf79F/Sec24CD/bai/p24-1/boca/KdelR/Syx6/Arl1
GO:BP	developmental cell growth	GO:0048588	7/282	75/12175	0.00171789	0.0218501	0.0169064	CadN/stan/SCAR/Nf1/CadN2/hep/Rab5
GO:BP	calcium-dependent cell-cell adhesion via plasma membrane cell adhesion molecules	GO:0016339	4/282	23/12175	0.00176227	0.0221736	0.0171567	CadN/stan/Cad87A/CadN2
GO:BP	regulation of fibroblast growth factor receptor signaling pathway	GO:0040036	3/282	11/12175	0.0017672	0.0221736	0.0171567	dally/sty/Ptp10D
GO:BP	regulation of cell projection organization	GO:0031344	10/282	143/12175	0.00180652	0.0225148	0.0174207	fra/CadN/stan/SCAR/Pten/hep/fz2/Ror/Trim9/Arp2
GO:BP	response to alcohol	GO:0097305	9/282	120/12175	0.00187512	0.023214	0.0179617	Syn/Agpat2/klg/hang/CASK/DOR/Tbh/pxb/vsg
GO:BP	positive regulation of actin filament polymerization	GO:0030838	5/282	39/12175	0.00194376	0.0238094	0.0184223	CG15236/SCAR/svr/Arp2/nwk
GO:BP	regulation of secretion by cell	GO:1903530	8/282	98/12175	0.00194885	0.0238094	0.0184223	Sytbeta/7B2/NFAT/cmpy/CASK/Sec24CD/Frq2/rho-5
GO:BP	epithelial cell migration	GO:0010631	11/282	170/12175	0.00201969	0.0245135	0.0189672	Sdc/sli/bnl/dally/Rab11/par-1/sqh/Ras85D/CASK/hep/Rab5
GO:BP	phosphatidylinositol-mediated signaling	GO:0048015	4/282	24/12175	0.00207663	0.0250409	0.0193752	Pten/norpA/fwd/Ror
GO:BP	cellular homeostasis	GO:0019725	13/282	223/12175	0.00209094	0.0250508	0.0193829	VhaAC45/Cnx99A/capt/Cbp53E/CG7484/Rbcn-3A/CG10413/alc/norpA/Fer2LCH/CG10470/CG31030/FMRFa
GO:BP	epithelium migration	GO:0090132	11/282	171/12175	0.00211526	0.025145	0.0194558	Sdc/sli/bnl/dally/Rab11/par-1/sqh/Ras85D/CASK/hep/Rab5
GO:BP	regulation of endocytosis	GO:0030100	6/282	58/12175	0.00215788	0.025145	0.0194558	norpA/Arf79F/CASK/mnb/brat/Rab5
GO:BP	positive regulation of supramolecular fiber organization	GO:1902905	6/282	58/12175	0.00215788	0.025145	0.0194558	CG15236/SCAR/svr/hep/Arp2/nwk
GO:BP	developmental maturation	GO:0021700	13/282	224/12175	0.00217486	0.025145	0.0194558	plum/cic/Ddc/capt/orb/shep/Rab11/par-1/Ras85D/Arf79F/bai/ben/tud
GO:BP	epithelial cell migration, open tracheal system	GO:0007427	5/282	40/12175	0.00218005	0.025145	0.0194558	Sdc/sli/bnl/dally/Ras85D
GO:BP	regulation of hemocyte proliferation	GO:0035206	5/282	40/12175	0.00218005	0.025145	0.0194558	Pten/Ras85D/fz2/pxb/msl-3
GO:BP	cAMP biosynthetic process	GO:0006171	3/282	12/12175	0.00231613	0.0265497	0.0205426	CG43373/Ac76E/Ac3
GO:BP	plasmatocyte differentiation	GO:0042387	4/282	25/12175	0.00242767	0.0274889	0.0212694	bnl/Pten/Ras85D/sty
GO:BP	inositol lipid-mediated signaling	GO:0048017	4/282	25/12175	0.00242767	0.0274889	0.0212694	Pten/norpA/fwd/Ror
GO:BP	regulation of protein localization	GO:0032880	8/282	102/12175	0.00250906	0.0282383	0.0218492	dally/Rab11/cmpy/Evi5/Asap/Arl1/cno/rho-5
GO:BP	cell motility	GO:0048870	18/282	371/12175	0.00253696	0.0283803	0.0219591	Sdc/jeb/fra/sli/bnl/SCAR/dally/Rab11/par-1/Pten/sqh/Ras85D/Evi5/CASK/hep/fz2/Rab5/Arl1
GO:BP	actin polymerization or depolymerization	GO:0008154	7/282	81/12175	0.00267637	0.0297606	0.0230271	capt/CG15236/SCAR/svr/Kank/Arp2/nwk
GO:BP	adenylate cyclase-activating G protein-coupled receptor signaling pathway	GO:0007189	5/282	42/12175	0.0027144	0.0298263	0.0230779	CG43373/Ac76E/Pdfr/hang/Ac3
GO:BP	regulation of multicellular organism growth	GO:0040014	5/282	42/12175	0.0027144	0.0298263	0.0230779	Ac76E/Pten/RASSF8/Ras85D/Nf1
GO:BP	regulation of intracellular signal transduction	GO:1902531	17/282	344/12175	0.00274398	0.0299739	0.0231922	jeb/RapGAP1/Epac/Pdfr/par-1/Pten/Ras85D/Nf1/sty/Sik3/siz/mnb/ben/Rlip/Ror/MAPk-Ak2/cno
GO:BP	adenylate cyclase-modulating G protein-coupled receptor signaling pathway	GO:0007188	6/282	61/12175	0.00279435	0.0301692	0.0233432	CG43373/Ac76E/Pdfr/hang/Ac3/MsR1
GO:BP	positive regulation of cytoskeleton organization	GO:0051495	6/282	61/12175	0.00279435	0.0301692	0.0233432	CG15236/SCAR/svr/hep/Arp2/nwk
GO:BP	circadian rhythm	GO:0007623	10/282	152/12175	0.00282941	0.0303609	0.0234915	Pdfr/nvy/Ac3/Nf1/norpA/Sik3/Dh44/Fer2LCH/cyc/rho-5
GO:BP	regionalization	GO:0003002	22/282	498/12175	0.0028448	0.0303609	0.0234915	cic/fra/fred/stan/capt/sli/dally/orb/Rab11/par-1/exd/sqh/Acsl/Ras85D/sty/bai/hth/hep/Lim1/fz2/brat/tud
GO:BP	Golgi organization	GO:0007030	7/282	82/12175	0.00286957	0.0304502	0.0235607	Ire1/Sec24CD/bai/Asap/p24-1/fwd/Arl1
GO:BP	cellular cation homeostasis	GO:0030003	9/282	128/12175	0.00291352	0.0307409	0.0237856	VhaAC45/Cnx99A/Cbp53E/Rbcn-3A/norpA/Fer2LCH/CG10470/CG31030/FMRFa
GO:BP	cellular response to chemical stimulus	GO:0070887	21/282	468/12175	0.00293804	0.0307806	0.0238163	Sytbeta/bnl/Spp/dally/Pten/msi/CG5056/cmpy/Ras85D/Ire1/sty/Sik3/CG32638/kcc/hep/DOR/ben/Dh44/Xbp1/5-HT2B/Ptp10D
GO:BP	negative regulation of multicellular organism growth	GO:0040015	3/282	13/12175	0.00295972	0.0307806	0.0238163	Ac76E/Pten/RASSF8
GO:BP	rhythmic process	GO:0048511	10/282	153/12175	0.002967	0.0307806	0.0238163	Pdfr/nvy/Ac3/Nf1/norpA/Sik3/Dh44/Fer2LCH/cyc/rho-5
GO:BP	localization of cell	GO:0051674	18/282	377/12175	0.00301135	0.0310671	0.024038	Sdc/jeb/fra/sli/bnl/SCAR/dally/Rab11/par-1/Pten/sqh/Ras85D/Evi5/CASK/hep/fz2/Rab5/Arl1
GO:BP	regulation of cell shape	GO:0008360	6/282	62/12175	0.00303489	0.0311369	0.024092	capt/SCAR/Rab11/Pten/Sec24CD/tyn
GO:BP	cellular ion homeostasis	GO:0006873	9/282	129/12175	0.00307015	0.0313257	0.024238	VhaAC45/Cnx99A/Cbp53E/Rbcn-3A/norpA/Fer2LCH/CG10470/CG31030/FMRFa
GO:BP	heterophilic cell-cell adhesion via plasma membrane cell adhesion molecules	GO:0007157	4/282	27/12175	0.003248	0.0329592	0.0255019	beat-Ib/beat-IIb/beat-IIa/beat-IIIb
GO:BP	regulation of actin filament organization	GO:0110053	7/282	84/12175	0.00328787	0.0331825	0.0256747	CG15236/SCAR/svr/Kank/hep/Arp2/nwk
GO:BP	regulation of synapse organization	GO:0050807	10/282	157/12175	0.00357173	0.0358524	0.0277406	Sdc/stan/Rab11/Nf1/CASK/dbo/mnb/Arp2/brat/nwk
GO:BP	cellular response to organic substance	GO:0071310	17/282	354/12175	0.00367536	0.0363353	0.0281142	bnl/Spp/dally/Pten/cmpy/Ras85D/Ire1/sty/Sik3/CG32638/hep/DOR/ben/Dh44/Xbp1/5-HT2B/Ptp10D
GO:BP	amine biosynthetic process	GO:0009309	3/282	14/12175	0.00370289	0.0363353	0.0281142	Ddc/Sms/Tbh
GO:BP	cellular biogenic amine biosynthetic process	GO:0042401	3/282	14/12175	0.00370289	0.0363353	0.0281142	Ddc/Sms/Tbh
GO:BP	mesoderm morphogenesis	GO:0048332	4/282	28/12175	0.00372127	0.0363353	0.0281142	jeb/sli/miple1/Ras85D
GO:BP	regulation of cytosolic calcium ion concentration	GO:0051480	4/282	28/12175	0.00372127	0.0363353	0.0281142	Cnx99A/Cbp53E/norpA/FMRFa
GO:BP	glycerolipid metabolic process	GO:0046486	10/282	158/12175	0.00373723	0.0363353	0.0281142	Agpat2/rdgB/Pten/Acsl/norpA/Sik3/CG17646/fwd/5PtaseI/Dgk
GO:BP	cell-cell signaling by wnt	GO:0198738	9/282	133/12175	0.00376431	0.0364079	0.0281704	dally/ATP6AP2/Eip63E/bai/Dyrk2/p24-1/fz2/Wnk/Bili
GO:BP	circadian behavior	GO:0048512	8/282	109/12175	0.00378516	0.0364199	0.0281797	Pdfr/Ac3/Nf1/Sik3/Dh44/Fer2LCH/cyc/rho-5
GO:BP	epidermal growth factor receptor signaling pathway	GO:0007173	6/282	65/12175	0.00384963	0.0366604	0.0283657	cic/Mvb12/Ras85D/sty/Ptp10D/rho-5
GO:BP	ERBB signaling pathway	GO:0038127	6/282	65/12175	0.00384963	0.0366604	0.0283657	cic/Mvb12/Ras85D/sty/Ptp10D/rho-5
GO:BP	rhythmic behavior	GO:0007622	8/282	110/12175	0.00400225	0.0378659	0.0292985	Pdfr/Ac3/Nf1/Sik3/Dh44/Fer2LCH/cyc/rho-5
GO:BP	regulation of cell population proliferation	GO:0042127	12/282	213/12175	0.00404209	0.0378659	0.0292985	bnl/mats/zld/Pten/Ras85D/hth/fz2/pxb/brat/Rab5/vsg/msl-3
GO:BP	positive regulation of protein polymerization	GO:0032273	5/282	46/12175	0.00405779	0.0378659	0.0292985	CG15236/SCAR/svr/Arp2/nwk
GO:BP	hemocyte proliferation	GO:0035172	5/282	46/12175	0.00405779	0.0378659	0.0292985	Pten/Ras85D/fz2/pxb/msl-3
GO:BP	regulation of cellular component biogenesis	GO:0044087	15/282	299/12175	0.00416794	0.0386993	0.0299433	Sdc/stan/CG15236/SCAR/Pten/svr/Kank/Nf1/CASK/dbo/mnb/hep/Arp2/brat/nwk
GO:BP	regulation of synapse structure or activity	GO:0050803	11/282	187/12175	0.0042125	0.0387794	0.0300053	Sdc/stan/Rab11/Nf1/CASK/dbo/mnb/Arp2/brat/Rab5/nwk
GO:BP	regulation of synaptic assembly at neuromuscular junction	GO:0008582	8/282	111/12175	0.00422883	0.0387794	0.0300053	Sdc/Nf1/CASK/dbo/mnb/Arp2/brat/nwk
GO:BP	cellular biogenic amine metabolic process	GO:0006576	4/282	29/12175	0.00423921	0.0387794	0.0300053	Ddc/Ace/Sms/Tbh
GO:BP	regulation of multicellular organismal development	GO:2000026	14/282	271/12175	0.00430324	0.0391721	0.0303092	Sdc/CadN/stan/Rab11/par-1/zld/Pten/Nf1/dbo/mnb/tyn/Arp2/brat/nwk
GO:BP	negative regulation of developmental growth	GO:0048640	7/282	89/12175	0.00453712	0.0410165	0.0317363	cic/Ac76E/Pten/RASSF8/Nf1/dbo/nwk
GO:BP	cell-cell adhesion mediated by cadherin	GO:0044331	3/282	15/12175	0.00455003	0.0410165	0.0317363	CadN/Cad87A/CadN2
GO:BP	regulation of actin cytoskeleton organization	GO:0032956	8/282	113/12175	0.00471155	0.0422673	0.0327041	CG15236/SCAR/svr/Kank/sqh/hep/Arp2/nwk
GO:BP	regulation of actin filament polymerization	GO:0030833	6/282	68/12175	0.00481622	0.0424636	0.0328559	CG15236/SCAR/svr/Kank/Arp2/nwk
GO:BP	locomotor rhythm	GO:0045475	6/282	68/12175	0.00481622	0.0424636	0.0328559	Pdfr/Ac3/Nf1/Dh44/Fer2LCH/cyc
GO:BP	olfactory behavior	GO:0042048	7/282	90/12175	0.00482489	0.0424636	0.0328559	Syn/Nf1/Calr/mnb/Dyrk2/dare/NPFR
GO:BP	gliogenesis	GO:0042063	7/282	90/12175	0.00482489	0.0424636	0.0328559	Sdc/fra/sli/bnl/Nf1/sty/cno
GO:BP	multicellular organism growth	GO:0035264	5/282	48/12175	0.00488256	0.0427685	0.0330919	Ac76E/Pten/RASSF8/Ras85D/Nf1
GO:BP	regulation of actin filament-based process	GO:0032970	8/282	115/12175	0.00523547	0.0454531	0.0351691	CG15236/SCAR/svr/Kank/sqh/hep/Arp2/nwk
GO:BP	regulation of molecular function	GO:0065009	18/282	398/12175	0.00529161	0.0454531	0.0351691	capt/RapGAP1/tbc/7B2/Pten/alc/Nf1/Evi5/sty/Asap/Rlip/Ror/CG1695/CG3703/Ddr/Tbc1d15-17/Wnk/NPFR
GO:BP	amine metabolic process	GO:0009308	4/282	31/12175	0.00541653	0.0454531	0.0351691	Ddc/Ace/Sms/Tbh
GO:BP	actin cytoskeleton reorganization	GO:0031532	4/282	31/12175	0.00541653	0.0454531	0.0351691	SCAR/Rab11/RhoGEF3/CG32982
GO:BP	cellular amine metabolic process	GO:0044106	4/282	31/12175	0.00541653	0.0454531	0.0351691	Ddc/Ace/Sms/Tbh
GO:BP	protein localization to endoplasmic reticulum	GO:0070972	4/282	31/12175	0.00541653	0.0454531	0.0351691	Spase22-23/Spase25/KdelR/Sgt
GO:BP	photoreceptor cell morphogenesis	GO:0008594	3/282	16/12175	0.00550507	0.0454531	0.0351691	Ras85D/Ire1/ben
GO:BP	spermatocyte division	GO:0048137	3/282	16/12175	0.00550507	0.0454531	0.0351691	Rab11/Pex13/fwd
GO:BP	axon extension involved in axon guidance	GO:0048846	3/282	16/12175	0.00550507	0.0454531	0.0351691	CadN/SCAR/CadN2
GO:BP	neuron projection extension involved in neuron projection guidance	GO:1902284	3/282	16/12175	0.00550507	0.0454531	0.0351691	CadN/SCAR/CadN2
GO:BP	Ras protein signal transduction	GO:0007265	9/282	141/12175	0.00551786	0.0454531	0.0351691	Epac/Rab11/Cdep/Ras85D/Nf1/sty/Arf79F/siz/Rlip
GO:BP	modulation of chemical synaptic transmission	GO:0050804	9/282	141/12175	0.00551786	0.0454531	0.0351691	jeb/Cbp53E/NFAT/Pten/CASK/cdm/Sap47/Frq2/FMRFa
GO:BP	regulation of trans-synaptic signaling	GO:0099177	9/282	141/12175	0.00551786	0.0454531	0.0351691	jeb/Cbp53E/NFAT/Pten/CASK/cdm/Sap47/Frq2/FMRFa
GO:BP	response to abiotic stimulus	GO:0009628	19/282	431/12175	0.00553172	0.0454531	0.0351691	Ddc/Hsp67Bc/Syn/Pdfr/NFAT/rdgB/ATP6AP2/hang/msi/Nf1/norpA/Hsp67Ba/kcc/cdm/mnb/hep/Dyrk2/Calx/nAChRalpha7
GO:BP	cell maturation	GO:0048469	11/282	195/12175	0.00575406	0.0470717	0.0364215	plum/cic/capt/orb/shep/Rab11/par-1/Ras85D/Arf79F/bai/tud
GO:BP	regulation of neuromuscular junction development	GO:1904396	8/282	117/12175	0.00580283	0.0472625	0.0365691	Sdc/Nf1/CASK/dbo/mnb/Arp2/brat/nwk
GO:BP	regulation of actin polymerization or depolymerization	GO:0008064	6/282	71/12175	0.0059504	0.048043	0.037173	CG15236/SCAR/svr/Kank/Arp2/nwk
GO:BP	regulation of actin filament length	GO:0030832	6/282	71/12175	0.0059504	0.048043	0.037173	CG15236/SCAR/svr/Kank/Arp2/nwk
GO:BP	protein localization to extracellular region	GO:0071692	7/282	94/12175	0.00611526	0.0491603	0.0380375	tbc/dally/cmpy/Sec24CD/bai/p24-1/rho-5
GO:BP	anatomical structure maturation	GO:0071695	11/282	197/12175	0.00620149	0.0496387	0.0384076	plum/cic/capt/orb/shep/Rab11/par-1/Ras85D/Arf79F/bai/tud
GO:CC	neuron projection	GO:0043005	34/273	453/12100	6.41475e-10	1.69991e-07	1.2762e-07	Sdc/jeb/plum/DIP-delta/fra/CadN/dpr18/sli/dpr13/Dscam3/Syn/Pdfr/Cbp53E/nAChRalpha3/orb/klg/Rab11/par-1/AstA-R1/Ptp99A/Acsl/dpr15/Ca-alpha1T/CG44153/CASK/mnb/hep/Trim9/dpr2/gukh/Dscam2/AstC-R2/Ptp10D/nAChRalpha7
GO:CC	cytoplasmic vesicle	GO:0031410	32/273	443/12100	5.46841e-09	4.26769e-07	3.20395e-07	IA-2/CG1275/jeb/lovit/Fas3/Sytbeta/TM9SF2/Syn/7B2/Rab11/Pten/Mvb12/Ykt6/cmpy/Evi5/Arf79F/AP-2sigma/Sec24CD/bai/unc-13-4A/p24-1/Tbh/fz2/Gdi/Ist1/Syx6/Rph/Rab5/Frq2/vsg/cm/nwk
GO:CC	intracellular vesicle	GO:0097708	32/273	443/12100	5.46841e-09	4.26769e-07	3.20395e-07	IA-2/CG1275/jeb/lovit/Fas3/Sytbeta/TM9SF2/Syn/7B2/Rab11/Pten/Mvb12/Ykt6/cmpy/Evi5/Arf79F/AP-2sigma/Sec24CD/bai/unc-13-4A/p24-1/Tbh/fz2/Gdi/Ist1/Syx6/Rph/Rab5/Frq2/vsg/cm/nwk
GO:CC	cell junction	GO:0030054	32/273	446/12100	6.4418e-09	4.26769e-07	3.20395e-07	Sdc/jeb/plum/lovit/Fas3/CadN/fred/Sytbeta/stan/Syn/Cbp53E/nAChRalpha3/orb/Rab11/par-1/RASSF8/Kank/sqh/CASK/mnb/Asap/unc-13-4A/Sap47/Gdi/Syx6/gukh/Rph/Rab5/Frq2/nwk/cno/nAChRalpha7
GO:CC	axon	GO:0030424	22/273	237/12100	1.90585e-08	1.0101e-06	7.58326e-07	Sdc/jeb/plum/fra/CadN/sli/Dscam3/Syn/Cbp53E/klg/Rab11/par-1/Ptp99A/Acsl/CG44153/CASK/mnb/hep/Trim9/gukh/Dscam2/Ptp10D
GO:CC	secretory vesicle	GO:0099503	14/273	97/12100	3.32892e-08	1.47027e-06	1.1038e-06	IA-2/jeb/lovit/Sytbeta/Syn/7B2/Rab11/cmpy/unc-13-4A/Tbh/Gdi/Syx6/Rph/Frq2
GO:CC	vesicle	GO:0031982	32/273	488/12100	5.46623e-08	2.06936e-06	1.55356e-06	IA-2/CG1275/jeb/lovit/Fas3/Sytbeta/TM9SF2/Syn/7B2/Rab11/Pten/Mvb12/Ykt6/cmpy/Evi5/Arf79F/AP-2sigma/Sec24CD/bai/unc-13-4A/p24-1/Tbh/fz2/Gdi/Ist1/Syx6/Rph/Rab5/Frq2/vsg/cm/nwk
GO:CC	synapse	GO:0045202	23/273	306/12100	4.34203e-07	1.4383e-05	1.0798e-05	Sdc/jeb/lovit/Fas3/Sytbeta/Syn/Cbp53E/nAChRalpha3/orb/Rab11/par-1/CASK/mnb/unc-13-4A/Sap47/Gdi/Syx6/gukh/Rph/Rab5/Frq2/nwk/nAChRalpha7
GO:CC	integral component of plasma membrane	GO:0005887	30/273	496/12100	8.26984e-07	2.43501e-05	1.82807e-05	plum/DIP-delta/Fas3/fred/dpr13/Dscam3/CG43373/Ac76E/beat-Ib/PK2-R1/Pdfr/nAChRalpha3/rdgB/AstA-R1/Ac3/Cad87A/CadN2/MsR1/Ca-alpha1T/beat-IIa/kcc/Tsp97E/fz2/Ror/dpr2/Dscam2/Ddr/NPFR/AstC-R2/nAChRalpha7
GO:CC	transport vesicle	GO:0030133	12/273	102/12100	3.03465e-06	8.04183e-05	6.03736e-05	jeb/lovit/Sytbeta/Syn/Rab11/Ykt6/Sec24CD/unc-13-4A/Gdi/Syx6/Rph/Frq2
GO:CC	presynapse	GO:0098793	15/273	170/12100	6.9001e-06	0.00016623	0.000124796	jeb/lovit/Sytbeta/Syn/Cbp53E/Rab11/par-1/CASK/mnb/unc-13-4A/Gdi/Syx6/gukh/Rph/Frq2
GO:CC	synaptic vesicle	GO:0008021	9/273	74/12100	4.07003e-05	0.000898798	0.000674768	jeb/lovit/Sytbeta/Syn/unc-13-4A/Gdi/Syx6/Rph/Frq2
GO:CC	secretory granule	GO:0030141	6/273	30/12100	4.69961e-05	0.000957997	0.000719211	IA-2/7B2/Rab11/cmpy/Tbh/Rph
GO:CC	exocytic vesicle	GO:0070382	9/273	79/12100	6.86999e-05	0.00124939	0.00093797	jeb/lovit/Sytbeta/Syn/unc-13-4A/Gdi/Syx6/Rph/Frq2
GO:CC	distal axon	GO:0150034	10/273	98/12100	7.07199e-05	0.00124939	0.00093797	jeb/fra/Syn/Cbp53E/Rab11/par-1/CASK/mnb/Trim9/gukh
GO:CC	terminal bouton	GO:0043195	8/273	66/12100	0.000112058	0.00185597	0.00139336	jeb/Syn/Cbp53E/Rab11/par-1/CASK/mnb/gukh
GO:CC	apical part of cell	GO:0045177	13/273	172/12100	0.000140621	0.00219203	0.00164566	stan/SCAR/dally/ATP6AP2/Pde6/sqh/sty/Arf79F/tyn/Asap/boca/brat/Ptp10D
GO:CC	axon terminus	GO:0043679	8/273	72/12100	0.000207822	0.0030596	0.00229698	jeb/Syn/Cbp53E/Rab11/par-1/CASK/mnb/gukh
GO:CC	neuron projection terminus	GO:0044306	8/273	73/12100	0.000228913	0.00319273	0.00239693	jeb/Syn/Cbp53E/Rab11/par-1/CASK/mnb/gukh
GO:CC	cytoplasmic vesicle membrane	GO:0030659	10/273	137/12100	0.00107367	0.0142261	0.0106802	CG1275/Syn/Rab11/Pten/Mvb12/AP-2sigma/Sec24CD/Tbh/Syx6/Rph
GO:CC	vesicle membrane	GO:0012506	10/273	142/12100	0.00140989	0.0170136	0.0127729	CG1275/Syn/Rab11/Pten/Mvb12/AP-2sigma/Sec24CD/Tbh/Syx6/Rph
GO:CC	plasma membrane region	GO:0098590	17/273	332/12100	0.0014296	0.0170136	0.0127729	dpr18/stan/dpr13/nAChRalpha3/dally/Rab11/par-1/Pde6/pnut/sqh/dpr15/Arf79F/AP-2sigma/tyn/dpr2/gukh/nAChRalpha7
GO:CC	cell-cell junction	GO:0005911	9/273	119/12100	0.00147665	0.0170136	0.0127729	plum/Fas3/CadN/fred/stan/RASSF8/sqh/Asap/cno
GO:CC	anchoring junction	GO:0070161	10/273	152/12100	0.00233922	0.0258289	0.0193909	plum/Fas3/CadN/fred/stan/RASSF8/Kank/sqh/Asap/cno
GO:CC	intercellular bridge	GO:0045171	4/273	26/12100	0.00256184	0.0271208	0.0203608	par-1/pnut/sqh/vsg
GO:CC	proton-transporting V-type ATPase, V1 domain	GO:0033180	3/273	13/12100	0.00274703	0.0271208	0.0203608	VhaAC45/Vha14-1/CG31030
GO:CC	Golgi apparatus	GO:0005794	18/273	384/12100	0.00276325	0.0271208	0.0203608	ATP8A/CG3662/Rab11/CG31145/ATP6AP2/Ykt6/NUCB1/CG33129/Evi5/Arf79F/siz/bai/p24-1/fwd/Fer2LCH/Sap47/KdelR/Arl1
GO:CC	plasma membrane protein complex	GO:0098797	10/273	160/12100	0.00339274	0.0321099	0.0241063	VhaAC45/nAChRalpha3/norpA/CadN2/Ca-alpha1T/AP-2sigma/Vha14-1/fz2/CG31030/nAChRalpha7
GO:CC	synaptic vesicle membrane	GO:0030672	3/273	16/12100	0.00511632	0.0467526	0.0350992	Syn/Syx6/Rph
GO:CC	cleavage furrow	GO:0032154	4/273	32/12100	0.00554358	0.0489683	0.0367627	Rab11/pnut/sqh/Arf79F
GO:CC	exocytic vesicle membrane	GO:0099501	3/273	17/12100	0.00611016	0.052232	0.0392129	Syn/Syx6/Rph
GO:CC	perivitelline space	GO:0098595	3/273	18/12100	0.00721134	0.0581755	0.0436749	Sdc/fra/dally
GO:CC	transport vesicle membrane	GO:0030658	4/273	35/12100	0.00765743	0.0581755	0.0436749	Syn/Sec24CD/Syx6/Rph
GO:CC	proton-transporting V-type ATPase complex	GO:0033176	4/273	35/12100	0.00765743	0.0581755	0.0436749	VhaAC45/ATP6AP2/Vha14-1/CG31030
GO:CC	bounding membrane of organelle	GO:0098588	16/273	360/12100	0.00768355	0.0581755	0.0436749	CG1275/VhaAC45/Syn/Rab11/Pten/ATP6AP2/Mvb12/CG5065/Pex13/AP-2sigma/Sec24CD/siz/Vha14-1/Tbh/Syx6/Rph
GO:CC	plasma membrane proton-transporting V-type ATPase complex	GO:0033181	3/273	19/12100	0.00842248	0.0619988	0.0465453	VhaAC45/Vha14-1/CG31030
GO:CC	endoplasmic reticulum-Golgi intermediate compartment	GO:0005793	3/273	21/12100	0.0111834	0.0779896	0.0585503	NUCB1/bai/p24-1
GO:CC	proton-transporting two-sector ATPase complex, catalytic domain	GO:0033178	3/273	21/12100	0.0111834	0.0779896	0.0585503	VhaAC45/Vha14-1/CG31030
GO:CC	endoplasmic reticulum subcompartment	GO:0098827	12/273	251/12100	0.0116441	0.0791199	0.0593988	Cnx99A/CG8311/Spp/Spase22-23/rdgB/ATP6AP2/Ire1/Calr/Spase25/CG10470/EMC1/rho-5
GO:CC	SCF ubiquitin ligase complex	GO:0019005	5/273	63/12100	0.0136633	0.0905196	0.0679571	CG11658/CG5961/CG2247/CG12402/CG5003
GO:CC	germline ring canal	GO:0045172	3/273	23/12100	0.0144073	0.0931202	0.0699095	par-1/sqh/vsg
GO:CC	adherens junction	GO:0005912	4/273	43/12100	0.0156918	0.0990079	0.0743296	RASSF8/sqh/Asap/cno
GO:CC	cell surface	GO:0009986	5/273	69/12100	0.0196069	0.119263	0.0895363	Sdc/jeb/sli/dally/ATP6AP2
GO:CC	type I terminal bouton	GO:0061174	3/273	26/12100	0.0201308	0.119263	0.0895363	jeb/par-1/CASK
GO:CC	clathrin adaptor complex	GO:0030131	2/273	10/12100	0.0202523	0.119263	0.0895363	AP-2sigma/cm
GO:CC	coated vesicle	GO:0030135	5/273	70/12100	0.0207387	0.119276	0.0895457	Rab11/AP-2sigma/Sec24CD/bai/p24-1
GO:CC	cell division site	GO:0032153	4/273	47/12100	0.0211546	0.119276	0.0895457	Rab11/pnut/sqh/Arf79F
GO:CC	endoplasmic reticulum membrane	GO:0005789	11/273	244/12100	0.0226959	0.125082	0.0939049	Cnx99A/CG8311/Spp/Spase22-23/ATP6AP2/Ire1/Calr/Spase25/CG10470/EMC1/rho-5
GO:CC	receptor complex	GO:0043235	5/273	72/12100	0.0231284	0.125082	0.0939049	nAChRalpha3/Ror/cyc/Ddr/nAChRalpha7
GO:CC	perinuclear region of cytoplasm	GO:0048471	5/273	73/12100	0.0243873	0.127537	0.0957474	Cnx99A/Rab11/svr/sqh/ben
GO:CC	vacuolar proton-transporting V-type ATPase complex	GO:0016471	3/273	28/12100	0.0245448	0.127537	0.0957474	VhaAC45/ATP6AP2/Vha14-1
GO:CC	SNARE complex	GO:0031201	3/273	29/12100	0.0269315	0.136072	0.102156	Ykt6/Syx13/Syx6
GO:CC	nuclear outer membrane-endoplasmic reticulum membrane network	GO:0042175	11/273	251/12100	0.0272145	0.136072	0.102156	Cnx99A/CG8311/Spp/Spase22-23/ATP6AP2/Ire1/Calr/Spase25/CG10470/EMC1/rho-5
GO:CC	endoplasmic reticulum lumen	GO:0005788	2/273	12/12100	0.0288366	0.13894	0.104308	CG7484/boca
GO:CC	female germline ring canal	GO:0035324	2/273	12/12100	0.0288366	0.13894	0.104308	sqh/vsg
GO:CC	vacuole	GO:0005773	8/273	162/12100	0.0305209	0.14125	0.106043	CG1275/VhaAC45/cathD/Rab11/ATP6AP2/Arf79F/Vha14-1/DOR
GO:CC	recycling endosome	GO:0055037	4/273	53/12100	0.0313009	0.14125	0.106043	Fas3/Rab11/Evi5/nwk
GO:CC	organelle subcompartment	GO:0031984	14/273	357/12100	0.0319333	0.14125	0.106043	ATP8A/Cnx99A/CG8311/Spp/Spase22-23/rdgB/ATP6AP2/Ire1/Calr/Spase25/Arf79F/CG10470/EMC1/rho-5
GO:CC	COPII-coated ER to Golgi transport vesicle	GO:0030134	3/273	31/12100	0.0320627	0.14125	0.106043	Sec24CD/bai/p24-1
GO:CC	endosome	GO:0005768	11/273	259/12100	0.0331365	0.14125	0.106043	CG1275/Fas3/Rab11/Pten/Mvb12/Evi5/Arf79F/fz2/Ist1/Rab5/nwk
GO:CC	proteasome core complex, beta-subunit complex	GO:0019774	2/273	13/12100	0.0335801	0.14125	0.106043	Prosbeta5/Prosbeta3
GO:CC	AP-type membrane coat adaptor complex	GO:0030119	2/273	13/12100	0.0335801	0.14125	0.106043	AP-2sigma/cm
GO:CC	axonal growth cone	GO:0044295	2/273	13/12100	0.0335801	0.14125	0.106043	fra/Trim9
GO:CC	side of membrane	GO:0098552	5/273	81/12100	0.0360504	0.146967	0.110335	Spp/dally/ATP6AP2/sty/cno
GO:CC	membrane coat	GO:0030117	3/273	33/12100	0.0376669	0.146967	0.110335	AP-2sigma/Sec24CD/cm
GO:CC	coated membrane	GO:0048475	3/273	33/12100	0.0376669	0.146967	0.110335	AP-2sigma/Sec24CD/cm
GO:CC	integral component of endoplasmic reticulum membrane	GO:0030176	5/273	82/12100	0.0377124	0.146967	0.110335	Cnx99A/CG8311/Spp/CG10470/EMC1
GO:CC	neuromuscular junction	GO:0031594	5/273	82/12100	0.0377124	0.146967	0.110335	Sdc/Fas3/par-1/CASK/nwk
GO:CC	somatodendritic compartment	GO:0036477	11/273	267/12100	0.0399208	0.153319	0.115104	plum/fra/CadN/Pdfr/Cbp53E/klg/Rab11/kcc/brat/Rab5/nAChRalpha7
GO:CC	intrinsic component of endoplasmic reticulum membrane	GO:0031227	5/273	85/12100	0.0429768	0.159336	0.119621	Cnx99A/CG8311/Spp/CG10470/EMC1
GO:CC	fusome	GO:0045169	3/273	35/12100	0.0437366	0.159336	0.119621	Rab11/par-1/Calr
GO:CC	proton-transporting two-sector ATPase complex	GO:0016469	4/273	59/12100	0.0438706	0.159336	0.119621	VhaAC45/ATP6AP2/Vha14-1/CG31030
GO:CC	endoplasmic reticulum exit site	GO:0070971	2/273	15/12100	0.0438925	0.159336	0.119621	tbc/Sec24CD
GO:CC	apical plasma membrane	GO:0016324	5/273	88/12100	0.0486623	0.172362	0.1294	stan/dally/Pde6/sqh/tyn
GO:CC	external side of plasma membrane	GO:0009897	2/273	16/12100	0.049432	0.172362	0.1294	dally/ATP6AP2
GO:CC	clathrin coat	GO:0030118	2/273	16/12100	0.049432	0.172362	0.1294	AP-2sigma/cm

## Sheet: Cluster 2
source	term_name	term_id	GeneRatio	BgRatio	pvalue	p.adjust	qvalue	geneID
GO:MF	cation transmembrane transporter activity	GO:0008324	65/785	338/12049	1.26188e-15	5.84588e-13	4.59255e-13	Cyt-c1/GC1/Atpalpha/blw/COX4/ATPsynF/ATPsynbeta/ATPsynC/COX5A/ATPsynD/Sfxn2/ATPsyngamma/cype/Hk/Vha26/COX5B/RFeSP/sun/UQCR-Q/ATPsynCF6/levy/mfrn/CG43066/ATPsynO/Nmdar1/COX7A/ATPsynE/CG1090/UQCR-6.4/CG42542/CG42594/Vha68-1/VhaSFD/Ih/Tmem63/CG15270/COX8/CG4743/ATPsyndelta/SPoCk/stj/Vha36-1/PMCA/Nckx30C/Mid1/ATPsynG/COX7C/Vha55/NaPi-III/nAChRbeta1/Vha44/CG6574/sei/nAChRalpha2/ZnT49B/Eaat2/SK/CG33181…
GO:MF	proton transmembrane transporter activity	GO:0015078	32/785	95/12049	2.32167e-15	5.84588e-13	4.59255e-13	Cyt-c1/blw/COX4/ATPsynF/ATPsynbeta/ATPsynC/COX5A/ATPsynD/ATPsyngamma/cype/Vha26/COX5B/RFeSP/sun/UQCR-Q/ATPsynCF6/levy/ATPsynO/COX7A/ATPsynE/UQCR-6.4/Vha68-1/VhaSFD/COX8/ATPsyndelta/Vha36-1/ATPsynG/COX7C/Vha55/Vha44/VhaAC39-1/CG9706
GO:MF	electron transfer activity	GO:0009055	27/785	68/12049	3.22383e-15	5.84588e-13	4.59255e-13	Cyt-c1/ND-30/COX4/COX5A/SdhC/ND-B14.5B/cype/ND-49/ND-20/SdhA/ND-75/COX5B/RFeSP/UQCR-Q/ND-B14.5A/levy/SdhB/Cyt-c-p/ND-23/COX7A/UQCR-6.4/ND-B18/ND-51/ND-24/COX8/ND-ASHI/COX7C
GO:MF	primary active transmembrane transporter activity	GO:0015399	39/785	146/12049	1.30539e-14	1.77533e-12	1.39471e-12	Cyt-c1/Atpalpha/ND-30/COX4/COX5A/ND-B14.5B/cype/ND-49/Vha26/ND-20/ND-75/COX5B/RFeSP/UQCR-Q/ND-B14.5A/levy/ND-23/COX7A/UQCR-6.4/ND-B18/Vha68-1/Hsc70-5/VhaSFD/ND-51/ND-24/COX8/SPoCk/Vha36-1/PMCA/ND-ASHI/COX7C/Vha55/Vha44/Hmt-1/Eato/VhaAC39-1/CG3156/CG1824/rdog
GO:MF	active transmembrane transporter activity	GO:0022804	54/785	266/12049	3.51959e-14	3.82931e-12	3.00832e-12	Cyt-c1/GC1/Atpalpha/ND-30/COX4/COX5A/ND-B14.5B/cype/ND-49/Vha26/ND-20/Mpcp2/ND-75/COX5B/RFeSP/UQCR-Q/ND-B14.5A/levy/CG43066/ND-23/COX7A/CG1090/UQCR-6.4/ND-B18/Vha68-1/Hsc70-5/VhaSFD/ND-51/ND-24/COX8/Ent3/SPoCk/CG1907/Vha36-1/PMCA/Nckx30C/ND-ASHI/COX7C/Dic1/Vha55/NaPi-III/Vha44/kar/Eaat2/Hmt-1/Eato/Tpc1/CG6928/VhaAC39-1/CG3156/CG1824/CG14971/CG9706/rdog
GO:MF	inorganic cation transmembrane transporter activity	GO:0022890	59/785	319/12049	1.65639e-13	1.50179e-11	1.17982e-11	Cyt-c1/GC1/Atpalpha/blw/COX4/ATPsynF/ATPsynbeta/ATPsynC/COX5A/ATPsynD/ATPsyngamma/cype/Hk/Vha26/COX5B/RFeSP/sun/UQCR-Q/ATPsynCF6/levy/mfrn/CG43066/ATPsynO/Nmdar1/COX7A/ATPsynE/CG1090/UQCR-6.4/CG42542/CG42594/Vha68-1/VhaSFD/Ih/Tmem63/CG15270/COX8/ATPsyndelta/SPoCk/stj/Vha36-1/PMCA/Nckx30C/Mid1/ATPsynG/COX7C/Vha55/NaPi-III/nAChRbeta1/Vha44/sei/nAChRalpha2/Eaat2/SK/Stim/VhaAC39-1/eag/na/Piezo/CG9706
GO:MF	oxidoreduction-driven active transmembrane transporter activity	GO:0015453	23/785	58/12049	3.80905e-13	2.96018e-11	2.32553e-11	Cyt-c1/ND-30/COX4/COX5A/ND-B14.5B/cype/ND-49/ND-20/ND-75/COX5B/RFeSP/UQCR-Q/ND-B14.5A/levy/ND-23/COX7A/UQCR-6.4/ND-B18/ND-51/ND-24/COX8/ND-ASHI/COX7C
GO:MF	ion transmembrane transporter activity	GO:0015075	72/785	484/12049	2.28693e-11	1.55512e-09	1.2217e-09	Cyt-c1/GC1/Atpalpha/blw/COX4/ATPsynF/ATPsynbeta/ATPsynC/COX5A/ATPsynD/Sfxn2/ATPsyngamma/cype/Hk/Vha26/COX5B/RFeSP/CG9399/sun/UQCR-Q/porin/ATPsynCF6/levy/mfrn/CG43066/ATPsynO/Nmdar1/COX7A/ATPsynE/CG1090/UQCR-6.4/CG10353/CG42542/CG42594/Vha68-1/VhaSFD/Ih/Tmem63/CG15270/COX8/CG4743/ATPsyndelta/SPoCk/stj/CG1907/Vha36-1/PMCA/Nckx30C/Mid1/ATPsynG/COX7C/Dic1/Vha55/NaPi-III/nAChRbeta1/Vha44/CG6574/sei/nA…
GO:MF	inorganic molecular entity transmembrane transporter activity	GO:0015318	66/785	434/12049	6.22412e-11	3.76214e-09	2.95555e-09	Cyt-c1/GC1/Atpalpha/blw/COX4/ATPsynF/ATPsynbeta/ATPsynC/COX5A/ATPsynD/ATPsyngamma/cype/Hk/Vha26/Mpcp2/COX5B/RFeSP/sun/UQCR-Q/porin/ATPsynCF6/levy/mfrn/CG43066/ATPsynO/Nmdar1/COX7A/ATPsynE/CG1090/UQCR-6.4/CG10353/CG42542/CG42594/Vha68-1/VhaSFD/Ih/Tmem63/CG15270/COX8/ATPsyndelta/SPoCk/stj/CG1907/Vha36-1/PMCA/Nckx30C/Mid1/ATPsynG/COX7C/Dic1/Vha55/NaPi-III/nAChRbeta1/Vha44/sei/nAChRalpha2/Eaat2/SK/St…
GO:MF	oxidoreductase activity, acting on NAD(P)H	GO:0016651	15/785	41/12049	1.81802e-08	9.89004e-07	7.76965e-07	ND-30/ND-B14.5B/ND-18/ND-49/ND-20/ND-75/ND-B14.5A/ND-23/ND-B17/ND-B18/CG5946/ND-51/ND-24/ND-ASHI/AIF
GO:MF	active ion transmembrane transporter activity	GO:0022853	30/785	151/12049	3.14643e-08	1.55605e-06	1.22244e-06	Cyt-c1/GC1/Atpalpha/COX4/COX5A/cype/Vha26/COX5B/RFeSP/UQCR-Q/levy/CG43066/COX7A/CG1090/UQCR-6.4/Vha68-1/VhaSFD/COX8/SPoCk/Vha36-1/PMCA/Nckx30C/COX7C/Vha55/NaPi-III/Vha44/Eaat2/CG6928/VhaAC39-1/CG9706
GO:MF	proton-transporting ATP synthase activity, rotational mechanism	GO:0046933	10/785	18/12049	3.52933e-08	1.57515e-06	1.23744e-06	blw/ATPsynF/ATPsynbeta/ATPsynC/ATPsyngamma/sun/ATPsynCF6/ATPsynO/ATPsyndelta/ATPsynG
GO:MF	NADH dehydrogenase activity	GO:0003954	12/785	27/12049	3.76415e-08	1.57515e-06	1.23744e-06	ND-30/ND-B14.5B/ND-49/ND-20/ND-75/ND-B14.5A/ND-23/ND-B17/ND-B18/ND-51/ND-24/ND-ASHI
GO:MF	NAD(P)H dehydrogenase (quinone) activity	GO:0003955	11/785	23/12049	5.49053e-08	1.75697e-06	1.38028e-06	ND-30/ND-B14.5B/ND-49/ND-20/ND-75/ND-B14.5A/ND-23/ND-B18/ND-51/ND-24/ND-ASHI
GO:MF	NADH dehydrogenase (ubiquinone) activity	GO:0008137	11/785	23/12049	5.49053e-08	1.75697e-06	1.38028e-06	ND-30/ND-B14.5B/ND-49/ND-20/ND-75/ND-B14.5A/ND-23/ND-B18/ND-51/ND-24/ND-ASHI
GO:MF	oxidoreductase activity, acting on NAD(P)H, quinone or similar compound as acceptor	GO:0016655	11/785	23/12049	5.49053e-08	1.75697e-06	1.38028e-06	ND-30/ND-B14.5B/ND-49/ND-20/ND-75/ND-B14.5A/ND-23/ND-B18/ND-51/ND-24/ND-ASHI
GO:MF	NADH dehydrogenase (quinone) activity	GO:0050136	11/785	23/12049	5.49053e-08	1.75697e-06	1.38028e-06	ND-30/ND-B14.5B/ND-49/ND-20/ND-75/ND-B14.5A/ND-23/ND-B18/ND-51/ND-24/ND-ASHI
GO:MF	proton channel activity	GO:0015252	10/785	21/12049	2.3759e-07	7.18048e-06	5.64101e-06	blw/ATPsynF/ATPsynbeta/ATPsynC/ATPsyngamma/sun/ATPsynCF6/ATPsynO/ATPsyndelta/ATPsynG
GO:MF	ligase activity	GO:0016874	27/785	140/12049	2.8889e-07	8.27138e-06	6.49803e-06	blw/ATPsynF/ATPsynbeta/ATPsynC/ATPsyngamma/Gclc/sun/AspRS-m/ATPsynCF6/ATPsynO/ValRS-m/AdSS/PheRS-m/ATPsyndelta/ThrRS/ATPsynG/bur/Scsalpha1/MetRS-m/CG3961/PCB/ScsbetaA/TrpRS-m/TrpRS/LeuRS/AlaRS/RtcB
GO:MF	kinase activity	GO:0016301	44/785	316/12049	1.31108e-06	3.28999e-05	2.58463e-05	Argk/Pfk/Hex-A/CG8485/Pgk/CG6145/CG4629/Cdc2rk/Adk2/Wee1/CG2201/Dgkepsilon/Lk6/aux/CG8298/sgg/Ack/Adk3/PKD/Tao/sff/SRPK/Lkb1/hppy/dop/S6KL/Btk29A/IKKepsilon/p38b/Papss/Sik2/AMPKalpha/fbl/CG6650/Atg1/CkIalpha/gek/LIMK1/Gk2/CG6218/Cerk/Nak/Uck/Cdk12
GO:MF	iron-sulfur cluster binding	GO:0051536	14/785	48/12049	1.33051e-06	3.28999e-05	2.58463e-05	IscU/CG9674/ND-20/MagR/ND-75/Cisd2/RFeSP/SdhB/ND-23/Las/mAcon1/CG3420/ND-51/Irp-1B
GO:MF	metal cluster binding	GO:0051540	14/785	48/12049	1.33051e-06	3.28999e-05	2.58463e-05	IscU/CG9674/ND-20/MagR/ND-75/Cisd2/RFeSP/SdhB/ND-23/Las/mAcon1/CG3420/ND-51/Irp-1B
GO:MF	cation channel activity	GO:0005261	28/785	165/12049	2.59231e-06	6.13137e-05	4.81683e-05	blw/ATPsynF/ATPsynbeta/ATPsynC/ATPsyngamma/Hk/sun/ATPsynCF6/ATPsynO/Nmdar1/CG1090/CG42594/Ih/Tmem63/CG15270/ATPsyndelta/stj/Nckx30C/Mid1/ATPsynG/nAChRbeta1/sei/nAChRalpha2/SK/Stim/eag/na/Piezo
GO:MF	transferase activity, transferring phosphorus-containing groups	GO:0016772	51/785	406/12049	4.27836e-06	9.69761e-05	7.61848e-05	Argk/Pfk/Hex-A/CG8485/Pgk/Pcyt1/PyK/CG6145/CG4629/Cdc2rk/Adk2/Wee1/CG2201/Dgkepsilon/Lk6/aux/CG8298/Pect/sgg/Nmnat/Ack/Adk3/PKD/Tao/sff/CG7149/SRPK/Lkb1/hppy/dop/S6KL/Btk29A/IKKepsilon/p38b/Papss/Sik2/UGP/AMPKalpha/fbl/CG6650/Atg1/CkIalpha/gek/LIMK1/Gk2/CG6218/Cerk/Nak/Uck/mmy/Cdk12
GO:MF	cytochrome-c oxidase activity	GO:0004129	8/785	19/12049	1.24187e-05	0.000259837	0.000204129	COX4/COX5A/cype/COX5B/levy/COX7A/COX8/COX7C
GO:MF	oxidoreductase activity, acting on a heme group of donors	GO:0016675	8/785	19/12049	1.24187e-05	0.000259837	0.000204129	COX4/COX5A/cype/COX5B/levy/COX7A/COX8/COX7C
GO:MF	pyrophosphatase activity	GO:0016462	43/785	337/12049	1.64955e-05	0.000323406	0.000254069	shi/comt/Marf/Hsp60A/Arf51F/CCT8/CG14669/Khc/Trap1/TER94/CG11267/Lon/Rheb/Hsc70-5/Ras64B/Vps4/RabX1/CCT6/Arl8/mEFG1/Aps/bor/NTPase/SrpRalpha/Miro/nmd/RecQ5/smid/CG4908/bur/alphaTub84D/Hmt-1/Eato/CG13390/CCT2/Drp1/Kif3C/CG8641/CG3156/CG1824/Rai1/pix/rdog
GO:MF	phosphotransferase activity, alcohol group as acceptor	GO:0016773	39/785	294/12049	1.66459e-05	0.000323406	0.000254069	Pfk/Hex-A/CG8485/PyK/CG6145/CG4629/Cdc2rk/Wee1/CG2201/Dgkepsilon/Lk6/aux/CG8298/sgg/Ack/PKD/Tao/sff/SRPK/Lkb1/hppy/dop/S6KL/Btk29A/IKKepsilon/p38b/Papss/Sik2/AMPKalpha/fbl/CG6650/Atg1/CkIalpha/gek/LIMK1/Gk2/Cerk/Nak/Cdk12
GO:MF	hydrolase activity, acting on acid anhydrides, in phosphorus-containing anhydrides	GO:0016818	43/785	346/12049	3.14284e-05	0.000589553	0.000463155	shi/comt/Marf/Hsp60A/Arf51F/CCT8/CG14669/Khc/Trap1/TER94/CG11267/Lon/Rheb/Hsc70-5/Ras64B/Vps4/RabX1/CCT6/Arl8/mEFG1/Aps/bor/NTPase/SrpRalpha/Miro/nmd/RecQ5/smid/CG4908/bur/alphaTub84D/Hmt-1/Eato/CG13390/CCT2/Drp1/Kif3C/CG8641/CG3156/CG1824/Rai1/pix/rdog
GO:MF	hydrolase activity, acting on acid anhydrides	GO:0016817	43/785	348/12049	3.61042e-05	0.000654689	0.000514326	shi/comt/Marf/Hsp60A/Arf51F/CCT8/CG14669/Khc/Trap1/TER94/CG11267/Lon/Rheb/Hsc70-5/Ras64B/Vps4/RabX1/CCT6/Arl8/mEFG1/Aps/bor/NTPase/SrpRalpha/Miro/nmd/RecQ5/smid/CG4908/bur/alphaTub84D/Hmt-1/Eato/CG13390/CCT2/Drp1/Kif3C/CG8641/CG3156/CG1824/Rai1/pix/rdog
GO:MF	4 iron, 4 sulfur cluster binding	GO:0051539	8/785	23/12049	6.37503e-05	0.00111872	0.000878867	ND-20/ND-75/SdhB/ND-23/Las/mAcon1/ND-51/Irp-1B
GO:MF	nucleoside-triphosphatase activity	GO:0017111	39/785	313/12049	6.87666e-05	0.00115171	0.000904784	shi/comt/Marf/Hsp60A/Arf51F/CCT8/CG14669/Khc/Trap1/TER94/CG11267/Lon/Rheb/Hsc70-5/Ras64B/Vps4/RabX1/CCT6/Arl8/mEFG1/bor/SrpRalpha/Miro/nmd/RecQ5/smid/CG4908/alphaTub84D/Hmt-1/Eato/CG13390/CCT2/Drp1/Kif3C/CG8641/CG3156/CG1824/pix/rdog
GO:MF	ATPase-coupled cation transmembrane transporter activity	GO:0019829	10/785	36/12049	6.98645e-05	0.00115171	0.000904784	Atpalpha/Vha26/Vha68-1/VhaSFD/SPoCk/Vha36-1/PMCA/Vha55/Vha44/VhaAC39-1
GO:MF	phosphatidylinositol phosphate phosphatase activity	GO:0052866	7/785	18/12049	8.17702e-05	0.00130832	0.00102782	CG14411/Sac1/CG3632/INPP5E/Synj/CG6805/EDTP
GO:MF	ATPase-coupled transmembrane transporter activity	GO:0042626	16/785	88/12049	0.000156411	0.00243108	0.00190986	Atpalpha/Vha26/Vha68-1/Hsc70-5/VhaSFD/SPoCk/Vha36-1/PMCA/Vha55/Vha44/Hmt-1/Eato/VhaAC39-1/CG3156/CG1824/rdog
GO:MF	GTPase activator activity	GO:0005096	23/785	157/12049	0.000206984	0.00312776	0.00245718	TBC1D16/RhoGAP93B/RtGEF/sif/CG18659/CG34393/RN-tre/PsGEF/RhoGAP19D/GAPcenA/CG8155/ArfGAP1/drongo/CG3862/Efa6/CG34408/ArfGAP3/spri/CG42795/CG9098/Rabex-5/Trs31/HPS1
GO:MF	phosphatidylinositol monophosphate phosphatase activity	GO:0052744	5/785	10/12049	0.000221682	0.00325932	0.00256053	CG14411/Sac1/CG3632/Synj/EDTP
GO:MF	GTPase regulator activity	GO:0030695	23/785	162/12049	0.000330072	0.00460408	0.00361698	TBC1D16/RhoGAP93B/RtGEF/sif/CG18659/CG34393/RN-tre/PsGEF/RhoGAP19D/GAPcenA/CG8155/ArfGAP1/drongo/CG3862/Efa6/CG34408/ArfGAP3/spri/CG42795/CG9098/Rabex-5/Trs31/HPS1
GO:MF	nucleoside-triphosphatase regulator activity	GO:0060589	23/785	162/12049	0.000330072	0.00460408	0.00361698	TBC1D16/RhoGAP93B/RtGEF/sif/CG18659/CG34393/RN-tre/PsGEF/RhoGAP19D/GAPcenA/CG8155/ArfGAP1/drongo/CG3862/Efa6/CG34408/ArfGAP3/spri/CG42795/CG9098/Rabex-5/Trs31/HPS1
GO:MF	ATP hydrolysis activity	GO:0016887	23/785	166/12049	0.000470827	0.00621124	0.00487957	comt/Hsp60A/CCT8/Khc/Trap1/TER94/CG11267/Lon/Hsc70-5/Vps4/CCT6/bor/nmd/smid/CG4908/Hmt-1/Eato/CCT2/Kif3C/CG3156/CG1824/pix/rdog
GO:MF	aminoacyl-tRNA ligase activity	GO:0004812	9/785	37/12049	0.000479544	0.00621124	0.00487957	AspRS-m/ValRS-m/PheRS-m/ThrRS/MetRS-m/TrpRS-m/TrpRS/LeuRS/AlaRS
GO:MF	ligase activity, forming carbon-oxygen bonds	GO:0016875	9/785	37/12049	0.000479544	0.00621124	0.00487957	AspRS-m/ValRS-m/PheRS-m/ThrRS/MetRS-m/TrpRS-m/TrpRS/LeuRS/AlaRS
GO:MF	sulfur compound transmembrane transporter activity	GO:1901682	8/785	30/12049	0.000506197	0.00640398	0.00503099	CG4743/CG1907/Dic1/CG6574/Eaat2/Tpc1/CG6928/CG9706
GO:MF	calcium ion binding	GO:0005509	26/785	202/12049	0.000659691	0.00815619	0.00640753	AnxB10/Frq1/alpha-Man-Ib/LpR2/Syt4/elm/LpR1/CG6454/Dap160/SP2353/Gpo1/CG31345/alpha-Spec/PsGEF/Swip-1/Eps-15/Miro/Eip63F-1/Reps/CG44422/Mctp/LRP1/Mlc-c/Stim/Syt1/Cow
GO:MF	protein serine/threonine kinase activity	GO:0004674	23/785	171/12049	0.000718486	0.00859139	0.00674943	CG8485/CG4629/Cdc2rk/Lk6/sgg/PKD/Tao/sff/SRPK/Lkb1/hppy/dop/S6KL/IKKepsilon/p38b/Sik2/AMPKalpha/Atg1/CkIalpha/gek/LIMK1/Nak/Cdk12
GO:MF	NAD binding	GO:0051287	9/785	39/12049	0.000726478	0.00859139	0.00674943	Gapdh1/ND-49/Men-b/Gapdh2/Idh3a/ND-51/Gpdh1/CG9331/Sirt2
GO:MF	ion channel activity	GO:0005216	30/785	248/12049	0.00075511	0.00874	0.00686618	blw/ATPsynF/ATPsynbeta/ATPsynC/ATPsyngamma/Hk/sun/porin/ATPsynCF6/ATPsynO/Nmdar1/CG1090/CG10353/CG42594/Ih/Tmem63/CG15270/ATPsyndelta/stj/Nckx30C/Mid1/ATPsynG/nAChRbeta1/sei/nAChRalpha2/SK/Stim/eag/na/Piezo
GO:MF	channel activity	GO:0015267	31/785	263/12049	0.000959857	0.0104465	0.0082068	blw/ATPsynF/ATPsynbeta/ATPsynC/ATPsyngamma/Hk/sun/porin/ATPsynCF6/ATPsynO/Nmdar1/CG1090/CG10353/CG42594/Ih/Tmem63/CG15270/shakB/ATPsyndelta/stj/Nckx30C/Mid1/ATPsynG/nAChRbeta1/sei/nAChRalpha2/SK/Stim/eag/na/Piezo
GO:MF	passive transmembrane transporter activity	GO:0022803	31/785	263/12049	0.000959857	0.0104465	0.0082068	blw/ATPsynF/ATPsynbeta/ATPsynC/ATPsyngamma/Hk/sun/porin/ATPsynCF6/ATPsynO/Nmdar1/CG1090/CG10353/CG42594/Ih/Tmem63/CG15270/shakB/ATPsyndelta/stj/Nckx30C/Mid1/ATPsynG/nAChRbeta1/sei/nAChRalpha2/SK/Stim/eag/na/Piezo
GO:MF	calcium-dependent phospholipid binding	GO:0005544	5/785	13/12049	0.000960155	0.0104465	0.0082068	AnxB10/Syt4/CG6454/PsGEF/Syt1
GO:MF	protein kinase activity	GO:0004672	27/785	219/12049	0.00102091	0.0108897	0.00855501	CG8485/CG4629/Cdc2rk/Wee1/Lk6/aux/sgg/Ack/PKD/Tao/sff/SRPK/Lkb1/hppy/dop/S6KL/Btk29A/IKKepsilon/p38b/Sik2/AMPKalpha/Atg1/CkIalpha/gek/LIMK1/Nak/Cdk12
GO:MF	ATP-dependent activity	GO:0140657	41/785	382/12049	0.0010778	0.0112754	0.00885803	Atpalpha/comt/Vha26/Hsp60A/CCT8/Khc/Trap1/TER94/CG11267/Lon/Vha68-1/Hsc70-5/VhaSFD/Vps4/CCT6/CG9253/bor/SPoCk/Vha36-1/PMCA/nmd/RecQ5/Vha55/smid/Rs1/CG4908/CG14535/Khc-73/Vha44/CG3961/Hmt-1/Eato/spn-A/CCT2/Kif3C/Msh6/VhaAC39-1/CG3156/CG1824/pix/rdog
GO:MF	SNARE binding	GO:0000149	10/785	50/12049	0.00123186	0.012644	0.0099332	alphaSnap/Syt4/gammaSnap2/PsGEF/Rop/Snap25/Syx5/Syx18/nSyb/Syt1
GO:MF	2 iron, 2 sulfur cluster binding	GO:0051537	6/785	20/12049	0.00131857	0.0132834	0.0104355	IscU/MagR/Cisd2/RFeSP/SdhB/CG3420
GO:MF	oxidoreductase activity, acting on the CH-CH group of donors	GO:0016627	8/785	36/12049	0.00184902	0.0182884	0.0143675	SdhD/SdhC/SdhA/SdhB/Egm/CG9471/CG16935/Sc2
GO:MF	cytoskeletal protein binding	GO:0008092	34/785	313/12049	0.00228455	0.0221928	0.0174347	Arpc3A/shi/Ten-m/futsch/Vrp1/Khc/CG2258/Msp300/nudE/Tbce/robo3/Arl8/CG1890/alpha-Spec/Arp3/milt/pigs/beta-Spec/CG14535/ens/Hip1/alphaTub84D/Efa6/cpa/Mlc-c/Drp1/Kap3/elgi/Kif3C/inc/hts/Aplip1/Grip163/apolpp
GO:MF	pyrophosphate hydrolysis-driven proton transmembrane transporter activity	GO:0009678	7/785	30/12049	0.00263191	0.0236073	0.018546	Vha26/Vha68-1/VhaSFD/Vha36-1/Vha55/Vha44/VhaAC39-1
GO:MF	ATPase-coupled ion transmembrane transporter activity	GO:0042625	7/785	30/12049	0.00263191	0.0236073	0.018546	Vha26/Vha68-1/VhaSFD/Vha36-1/Vha55/Vha44/VhaAC39-1
GO:MF	ATPase activity, coupled to transmembrane movement of ions, rotational mechanism	GO:0044769	7/785	30/12049	0.00263191	0.0236073	0.018546	Vha26/Vha68-1/VhaSFD/Vha36-1/Vha55/Vha44/VhaAC39-1
GO:MF	proton-transporting ATPase activity, rotational mechanism	GO:0046961	7/785	30/12049	0.00263191	0.0236073	0.018546	Vha26/Vha68-1/VhaSFD/Vha36-1/Vha55/Vha44/VhaAC39-1
GO:MF	ubiquitin-like protein binding	GO:0032182	8/785	38/12049	0.0026626	0.0236073	0.018546	SCCRO/TSG101/Stam/CG2701/Npl4/Hrs/Atg1/CG12024
GO:MF	phosphatidylserine binding	GO:0001786	4/785	10/12049	0.00273393	0.0236073	0.018546	Syt4/PsGEF/drpr/Syt1
GO:MF	oxidoreductase activity, acting on diphenols and related substances as donors	GO:0016679	4/785	10/12049	0.00273393	0.0236073	0.018546	Cyt-c1/RFeSP/UQCR-Q/UQCR-6.4
GO:MF	enzyme regulator activity	GO:0030234	43/785	427/12049	0.00284244	0.0237706	0.0186743	Hasp/Frq1/Arf51F/TBC1D16/levy/Rpn7/RhoGAP93B/PPP4R2r/RtGEF/sif/CG18659/Hsc70-5/Rpn3/Rpn1/CG34393/RN-tre/Rpn2/Lkb1/tws/PsGEF/RhoGAP19D/GAPcenA/Eip63F-1/CG8155/ArfGAP1/drongo/bur/CG14408/CG3862/Efa6/CycC/sra/Mob2/Rab3-GAP/Asx/CG34408/ArfGAP3/spri/CG42795/CG9098/Rabex-5/Trs31/HPS1
GO:MF	phospholipid binding	GO:0005543	18/785	135/12049	0.00287851	0.0237706	0.0186743	AnxB10/EndoB/Syt4/Pcyt1/qvr/CG6454/CG18659/PsGEF/CG1902/beta-Spec/Snx3/Hip1/Efa6/Snx21/Snx17/EndoA/drpr/Syt1
GO:MF	catalytic activity, acting on a tRNA	GO:0140101	13/785	84/12049	0.00291677	0.0237706	0.0186743	AspRS-m/CG6094/ValRS-m/PheRS-m/ThrRS/CG1750/MetRS-m/rswl/TrpRS-m/TrpRS/LeuRS/AlaRS/CG9386
GO:MF	magnesium ion binding	GO:0000287	9/785	47/12049	0.00292763	0.0237706	0.0186743	Eno/PyK/Wee1/Idh3a/dop/Miro/CG13390/Pgm1/Fen1
GO:MF	transferase activity, transferring sulphur-containing groups	GO:0016782	7/785	32/12049	0.00388426	0.0310741	0.0244119	Las/CG7920/CG9164/Hs6st/Hs3st-B/CG31637/Nfs1
GO:MF	pyridoxal phosphate binding	GO:0030170	7/785	33/12049	0.00465835	0.036202	0.0284404	Gabat/CG1640/CG1983/CG1486/Nfs1/Gad1/CG8745
GO:MF	vitamin B6 binding	GO:0070279	7/785	33/12049	0.00465835	0.036202	0.0284404	Gabat/CG1640/CG1983/CG1486/Nfs1/Gad1/CG8745
GO:MF	transferase activity, transferring nitrogenous groups	GO:0016769	5/785	18/12049	0.00486644	0.0372865	0.0292924	Gapdh1/Gabat/Gapdh2/CG1640/CG8745
GO:MF	syntaxin binding	GO:0019905	6/785	26/12049	0.00560317	0.0415336	0.0326289	alphaSnap/gammaSnap2/Rop/Snap25/nSyb/Syt1
GO:MF	clathrin binding	GO:0030276	6/785	26/12049	0.00560317	0.0415336	0.0326289	Syt4/aux/AP-1sigma/PsGEF/Hip1/Syt1
GO:MF	lyase activity	GO:0016829	17/785	133/12049	0.00572866	0.0415336	0.0326289	Ald1/Eno/phr/Hmu/mAcon1/Cchl/Urod/Irp-1B/CG1486/Gycbeta100B/Fum1/Gad1/Uros1/CG8745/Gycalpha99B/CARPA/CG8778
GO:MF	aminoacyl-tRNA editing activity	GO:0002161	4/785	12/12049	0.00580248	0.0415336	0.0326289	ValRS-m/ThrRS/LeuRS/AlaRS
GO:MF	lysophospholipid acyltransferase activity	GO:0071617	4/785	12/12049	0.00580248	0.0415336	0.0326289	EndoB/frj/EndoA/nes
GO:MF	guanyl-nucleotide exchange factor activity	GO:0005085	12/785	81/12049	0.00596171	0.0421191	0.0330889	RtGEF/sif/CG18659/CG34393/PsGEF/CG3862/Efa6/spri/CG9098/Rabex-5/Trs31/HPS1
GO:MF	lipid binding	GO:0008289	22/785	192/12049	0.00692096	0.0482693	0.0379205	AnxB10/EndoB/Coq9/Syt4/Pcyt1/qvr/CG6454/CG6565/Npc2a/CG18659/PsGEF/CG1902/beta-Spec/Snx3/Hip1/Efa6/Snx21/Snx17/EndoA/drpr/Syt1/apolpp
	Description	ID	GeneRatio	BgRatio	pvalue	p.adjust	qvalue	geneID
GO:BP	generation of precursor metabolites and energy	GO:0006091	77/830	216/12175	5.25963e-36	1.33069e-32	1.03366e-32	Cyt-c1/Gapdh1/GC1/CG14757/blw/COX4/ATPsynF/Ald1/ATPsynbeta/CG5214/COX5A/Pfk/SdhD/Hex-A/SdhC/ND-B14.5B/ND-18/Chchd2/ND-49/Tpi/ND-19/ND-20/SdhA/ND-75/COX5B/Mdh1/Eno/bsf/Pgk/RFeSP/sun/UQCR-Q/ND-B14.5A/kdn/levy/ATPsynO/ND-42/ND-B22/PyK/CG7766/ND-B17.2/SdhB/Gapdh2/Cyt-c-p/ND-23/CG5028/COX7A/ND-B17/Idh3b/ND-13B/Pglym78/Idh3a/mAcon1/Atg3/UQCR-C2/sgg/Actbeta/ND-51/Gpo1/ND-24/AGBE/Irp-1B/Oscillin/CG6115/M…
GO:BP	energy derivation by oxidation of organic compounds	GO:0015980	63/830	167/12175	3.08119e-31	3.89771e-28	3.02767e-28	Cyt-c1/GC1/CG14757/COX4/ATPsynF/ATPsynbeta/CG5214/COX5A/SdhD/SdhC/ND-B14.5B/Chchd2/ND-49/ND-19/ND-20/SdhA/ND-75/COX5B/Mdh1/bsf/RFeSP/sun/UQCR-Q/ND-B14.5A/kdn/levy/ATPsynO/ND-42/ND-B22/CG7766/ND-B17.2/SdhB/Cyt-c-p/ND-23/CG5028/COX7A/ND-B17/Idh3b/ND-13B/Idh3a/mAcon1/Atg3/UQCR-C2/sgg/Actbeta/ND-51/Gpo1/ND-24/AGBE/Irp-1B/CG6115/Mdh2/ND-ASHI/COX7C/Gbs-76A/UGP/Scsalpha1/GlyS/Atg1/Fum1/ScsbetaA/Pgm1/AIF
GO:BP	ATP metabolic process	GO:0046034	57/830	137/12175	5.02112e-31	4.23448e-28	3.28927e-28	Cyt-c1/Gapdh1/CG14757/blw/COX4/ATPsynF/Ald1/ATPsynbeta/ATPsynC/COX5A/Pfk/SdhD/ATPsynD/Hex-A/ATPsyngamma/SdhC/ND-B14.5B/Chchd2/ND-49/Tpi/ND-19/SdhA/ND-75/COX5B/Eno/bsf/Pgk/RFeSP/sun/UQCR-Q/ND-B14.5A/ATPsynCF6/levy/ATPsynO/ND-42/ND-B22/PyK/ND-B17.2/SdhB/Gapdh2/Cyt-c-p/ND-23/COX7A/ATPsynE/ND-B17/Pglym78/Vha68-1/UQCR-C2/ND-51/ND-24/ATPsyndelta/ND-ASHI/ATPsynG/COX7C/Scox/Vha55/AIF
GO:BP	cellular respiration	GO:0045333	53/830	128/12175	8.57786e-29	5.4255e-26	4.21444e-26	Cyt-c1/GC1/CG14757/COX4/ATPsynF/ATPsynbeta/CG5214/COX5A/SdhD/SdhC/ND-B14.5B/Chchd2/ND-49/ND-19/ND-20/SdhA/ND-75/COX5B/Mdh1/bsf/RFeSP/sun/UQCR-Q/ND-B14.5A/kdn/levy/ATPsynO/ND-42/ND-B22/ND-B17.2/SdhB/Cyt-c-p/ND-23/CG5028/COX7A/ND-B17/Idh3b/ND-13B/Idh3a/mAcon1/UQCR-C2/ND-51/Gpo1/ND-24/Irp-1B/CG6115/Mdh2/ND-ASHI/COX7C/Scsalpha1/Fum1/ScsbetaA/AIF
GO:BP	aerobic respiration	GO:0009060	49/830	116/12175	3.50908e-27	1.77559e-24	1.37925e-24	Cyt-c1/CG14757/COX4/ATPsynF/ATPsynbeta/CG5214/COX5A/SdhD/SdhC/ND-B14.5B/Chchd2/ND-49/ND-19/ND-20/SdhA/ND-75/COX5B/Mdh1/bsf/RFeSP/sun/UQCR-Q/ND-B14.5A/kdn/levy/ATPsynO/ND-42/ND-B22/ND-B17.2/SdhB/Cyt-c-p/ND-23/CG5028/COX7A/ND-B17/Idh3b/Idh3a/mAcon1/UQCR-C2/ND-51/ND-24/Irp-1B/Mdh2/ND-ASHI/COX7C/Scsalpha1/Fum1/ScsbetaA/AIF
GO:BP	mitochondrion organization	GO:0007005	66/830	245/12175	4.75868e-23	1.95619e-20	1.51953e-20	CG14757/QIL1/ND-B14.7/Sod2/ND-B14.5B/ND-18/Marf/Chchd2/ND-19/ND-20/Hsp60A/ND-ACP/ND-39/CG11562/porin/Khc/ND-B22/ND-B17.2/UQCR-C1/ND-23/Chchd3/COX7A/Lon/Atg3/ND-B18/ND-15/Hsc70-5/ND-SGDH/COX6B/CG7382/ND-B14/Mitofilin/ND-PDSW/rho-7/CG5569/CG9393/bor/SREBP/Tom7/Roe1/Tom40/ND-ASHI/Miro/CG7791/milt/prel/CG5676/l(2)37Cc/OXA1L/HtrA2/Scox/Miga/CG4908/Tom70/CG3862/CG10340/ND-B16.6/CG4942/Atg1/ND-B12/sra/C…
GO:BP	electron transport chain	GO:0022900	37/830	78/12175	5.41237e-23	1.95619e-20	1.51953e-20	Cyt-c1/GC1/CG14757/blw/COX4/COX5A/SdhD/SdhC/ND-B14.5B/ND-18/Chchd2/ND-49/ND-19/SdhA/ND-75/COX5B/RFeSP/UQCR-Q/ND-B14.5A/levy/ND-42/ND-B22/ND-B17.2/SdhB/Cyt-c-p/ND-23/ND-B17/ND-13B/UQCR-C2/ND-51/Gpo1/ND-24/CG6115/ND-ASHI/COX7C/ND-B12/AIF
GO:BP	respiratory electron transport chain	GO:0022904	34/830	73/12175	6.61661e-21	2.0925e-18	1.62542e-18	Cyt-c1/GC1/CG14757/COX4/COX5A/SdhD/SdhC/ND-B14.5B/Chchd2/ND-49/ND-19/SdhA/ND-75/COX5B/RFeSP/UQCR-Q/ND-B14.5A/levy/ND-42/ND-B22/ND-B17.2/SdhB/Cyt-c-p/ND-23/ND-B17/ND-13B/UQCR-C2/ND-51/Gpo1/ND-24/CG6115/ND-ASHI/COX7C/AIF
GO:BP	oxidative phosphorylation	GO:0006119	36/830	84/12175	1.52136e-20	4.2767e-18	3.32207e-18	Cyt-c1/CG14757/COX4/ATPsynF/ATPsynbeta/COX5A/SdhD/SdhC/ND-B14.5B/Chchd2/ND-49/ND-19/SdhA/ND-75/COX5B/bsf/RFeSP/sun/UQCR-Q/ND-B14.5A/levy/ATPsynO/ND-42/ND-B22/ND-B17.2/SdhB/Cyt-c-p/ND-23/COX7A/ND-B17/UQCR-C2/ND-51/ND-24/ND-ASHI/COX7C/AIF
GO:BP	ATP synthesis coupled electron transport	GO:0042773	30/830	66/12175	3.20041e-18	8.09703e-16	6.28964e-16	Cyt-c1/CG14757/COX4/COX5A/SdhD/SdhC/ND-B14.5B/Chchd2/ND-49/ND-19/SdhA/ND-75/COX5B/RFeSP/UQCR-Q/ND-B14.5A/levy/ND-42/ND-B22/ND-B17.2/SdhB/Cyt-c-p/ND-23/ND-B17/UQCR-C2/ND-51/ND-24/ND-ASHI/COX7C/AIF
GO:BP	mitochondrial ATP synthesis coupled electron transport	GO:0042775	29/830	62/12175	4.39396e-18	1.01061e-15	7.85026e-16	Cyt-c1/CG14757/COX4/COX5A/SdhD/SdhC/ND-B14.5B/Chchd2/ND-49/ND-19/SdhA/COX5B/RFeSP/UQCR-Q/ND-B14.5A/levy/ND-42/ND-B22/ND-B17.2/SdhB/Cyt-c-p/ND-23/ND-B17/UQCR-C2/ND-51/ND-24/ND-ASHI/COX7C/AIF
GO:BP	aerobic electron transport chain	GO:0019646	26/830	54/12175	9.69718e-17	2.04449e-14	1.58813e-14	Cyt-c1/CG14757/COX4/COX5A/SdhD/SdhC/ND-B14.5B/ND-49/ND-19/SdhA/COX5B/RFeSP/UQCR-Q/ND-B14.5A/levy/ND-42/ND-B22/SdhB/Cyt-c-p/ND-23/ND-B17/UQCR-C2/ND-51/ND-24/ND-ASHI/COX7C
GO:BP	mitochondrial respiratory chain complex assembly	GO:0033108	27/830	68/12175	9.88421e-15	1.92362e-12	1.49424e-12	CG14757/ND-B14.7/ND-B14.5B/ND-18/ND-19/ND-20/ND-ACP/ND-39/CG11562/ND-B22/ND-B17.2/ND-23/ND-B18/ND-15/ND-SGDH/COX6B/ND-B14/ND-PDSW/CG5569/ND-ASHI/OXA1L/Scox/CG4908/ND-B16.6/CG4942/ND-B12/AIF
GO:BP	organophosphate metabolic process	GO:0019637	72/830	407/12175	3.56052e-14	6.43438e-12	4.99812e-12	Argk/Gapdh1/blw/ATPsynF/Ald1/ATPsynbeta/ATPsynC/Pfk/ATPsynD/CG6330/Hex-A/ATPsyngamma/Tpi/Eno/Pgk/Pcyt1/sun/elm/ATPsynCF6/ATPsynO/PyK/AMPdeam/Gapdh2/Pdhb/muc/CG6145/frj/Adk2/ATPsynE/CG2201/Pglym78/Ttc7/Pdha/CG14411/wun/CG8298/Sac1/Pect/Nmnat/AdSS/PGAP1/Ack/Adk3/CG3632/Gpo1/CG7149/Aps/Hmgs/ATPsyndelta/Ipp/Gpdh1/NTPase/ATPsynG/Vap33/Scox/Papss/CG3009/INPP5E/bur/Synj/Gycbeta100B/fbl/Idi/CG6805/CG7990…
GO:BP	NADH dehydrogenase complex assembly	GO:0010257	19/830	36/12175	1.60644e-13	2.54018e-11	1.97317e-11	ND-B14.7/ND-B14.5B/ND-18/ND-19/ND-20/ND-ACP/ND-39/ND-B22/ND-B17.2/ND-23/ND-B18/ND-15/ND-SGDH/ND-B14/ND-PDSW/CG5569/ND-ASHI/ND-B16.6/ND-B12
GO:BP	mitochondrial respiratory chain complex I assembly	GO:0032981	19/830	36/12175	1.60644e-13	2.54018e-11	1.97317e-11	ND-B14.7/ND-B14.5B/ND-18/ND-19/ND-20/ND-ACP/ND-39/ND-B22/ND-B17.2/ND-23/ND-B18/ND-15/ND-SGDH/ND-B14/ND-PDSW/CG5569/ND-ASHI/ND-B16.6/ND-B12
GO:BP	mitochondrial translation	GO:0032543	31/830	105/12175	1.24311e-12	1.85005e-10	1.43709e-10	mRpL45/mRpS33/mRpS23/mRpL35/bsf/mRpL27/mRpS30/mRpL24/mRpL1/mRpL51/mRpS5/mRpL16/mRpL28/mRpL52/mRpS2/CG6094/mRpL19/mRpL50/mRpL15/mRpL37/mRpS18B/mEFG1/mRpL3/mRpS11/mEFTs/mRpL4/mRF1/mRpS35/mRpS22/rswl/TrpRS-m
GO:BP	oxoacid metabolic process	GO:0043436	62/830	365/12175	1.42802e-11	2.00717e-09	1.55913e-09	slgA/Gapdh1/CG9674/P5CDh1/Ald1/Pfk/Hex-A/Tpi/SdhA/Gabat/Men-b/Ssadh/Mdh1/Eno/Pgk/P5cr/ND-ACP/AspRS-m/kdn/PyK/Gapdh2/Pdhb/muc/CG5028/Las/Idh3b/Pglym78/Idh3a/Pdha/Egm/ValRS-m/PheRS-m/CG7920/Irp-1B/Oscillin/SREBP/Gdh/CG12170/Mdh2/ThrRS/CG1486/CG16935/CG1440/Papss/Sc2/GLS/Fum1/MetRS-m/CG17896/CG3961/PCB/AhcyL1/beg/Gad1/TrpRS-m/TrpRS/Uros1/LeuRS/Mtpbeta/AlaRS/AdipoR/CG8778
GO:BP	mitochondrial gene expression	GO:0140053	33/830	129/12175	1.83411e-11	2.32735e-09	1.80785e-09	mRpL45/mRpS33/mRpS23/mRpL35/bsf/mRpL27/mRpS30/mRpL24/mRpL1/mRpL51/mRpS5/mRpL16/mRpL28/mRpL52/mRpS2/CG6094/mRpL19/mRpL50/mRpL15/mRpL37/mRpS18B/mEFG1/mRpL3/mRpS11/mEFTs/mRpL4/mRF1/mRpS35/mRpS22/Nfs1/rswl/CG4619/TrpRS-m
GO:BP	carbohydrate derivative metabolic process	GO:1901135	74/830	480/12175	1.83981e-11	2.32735e-09	1.80785e-09	Gapdh1/blw/ATPsynF/Ald1/ATPsynbeta/ATPsynC/Pfk/ATPsynD/CG6330/Hex-A/ATPsyngamma/alpha-Man-Ib/FucTA/Tpi/GCS1/FucT6/Eno/GlcAT-S/Pgk/sun/Mgat2/Alg11/ATPsynCF6/ATPsynO/PyK/AMPdeam/Gapdh2/Pdhb/muc/Adk2/ATPsynE/Pglym78/Pdha/CG9395/CG8298/AdSS/PGAP1/Ack/Adk3/Gpo1/sff/Aps/GCS2alpha/Hmgs/ATPsyndelta/Oscillin/Uggt/CG6659/Gpdh1/Hs6st/ATPsynG/Xxylt/Scox/Papss/bur/UGP/Pabp2/Gycbeta100B/fbl/CG3149/sotv/CG31690…
GO:BP	organic acid metabolic process	GO:0006082	62/830	370/12175	2.58794e-11	3.11785e-09	2.4219e-09	slgA/Gapdh1/CG9674/P5CDh1/Ald1/Pfk/Hex-A/Tpi/SdhA/Gabat/Men-b/Ssadh/Mdh1/Eno/Pgk/P5cr/ND-ACP/AspRS-m/kdn/PyK/Gapdh2/Pdhb/muc/CG5028/Las/Idh3b/Pglym78/Idh3a/Pdha/Egm/ValRS-m/PheRS-m/CG7920/Irp-1B/Oscillin/SREBP/Gdh/CG12170/Mdh2/ThrRS/CG1486/CG16935/CG1440/Papss/Sc2/GLS/Fum1/MetRS-m/CG17896/CG3961/PCB/AhcyL1/beg/Gad1/TrpRS-m/TrpRS/Uros1/LeuRS/Mtpbeta/AlaRS/AdipoR/CG8778
GO:BP	purine ribonucleotide metabolic process	GO:0009150	38/830	169/12175	3.69994e-11	4.13311e-09	3.21053e-09	Gapdh1/blw/ATPsynF/Ald1/ATPsynbeta/ATPsynC/Pfk/ATPsynD/Hex-A/ATPsyngamma/Tpi/Eno/Pgk/sun/ATPsynCF6/ATPsynO/PyK/AMPdeam/Gapdh2/Pdhb/muc/Adk2/ATPsynE/Pglym78/Pdha/AdSS/Adk3/Aps/Hmgs/ATPsyndelta/ATPsynG/Scox/Papss/bur/Gycbeta100B/fbl/ScsbetaA/Gycalpha99B
GO:BP	carboxylic acid metabolic process	GO:0019752	61/830	364/12175	3.75737e-11	4.13311e-09	3.21053e-09	slgA/Gapdh1/CG9674/P5CDh1/Ald1/Pfk/Hex-A/Tpi/SdhA/Gabat/Men-b/Ssadh/Mdh1/Eno/Pgk/P5cr/ND-ACP/AspRS-m/kdn/PyK/Gapdh2/Pdhb/muc/CG5028/Las/Idh3b/Pglym78/Idh3a/Pdha/Egm/ValRS-m/PheRS-m/CG7920/Irp-1B/Oscillin/SREBP/Gdh/CG12170/Mdh2/ThrRS/CG1486/CG16935/CG1440/Sc2/GLS/Fum1/MetRS-m/CG17896/CG3961/PCB/AhcyL1/beg/Gad1/TrpRS-m/TrpRS/Uros1/LeuRS/Mtpbeta/AlaRS/AdipoR/CG8778
GO:BP	ribonucleotide metabolic process	GO:0009259	39/830	178/12175	4.71631e-11	4.97177e-09	3.86199e-09	Gapdh1/blw/ATPsynF/Ald1/ATPsynbeta/ATPsynC/Pfk/ATPsynD/Hex-A/ATPsyngamma/Tpi/Eno/Pgk/sun/ATPsynCF6/ATPsynO/PyK/AMPdeam/Gapdh2/Pdhb/muc/Adk2/ATPsynE/Pglym78/Pdha/AdSS/Ack/Adk3/Aps/Hmgs/ATPsyndelta/ATPsynG/Scox/Papss/bur/Gycbeta100B/fbl/ScsbetaA/Gycalpha99B
GO:BP	tricarboxylic acid cycle	GO:0006099	17/830	37/12175	5.49859e-11	5.56457e-09	4.32247e-09	CG14757/CG5214/SdhD/SdhC/SdhA/Mdh1/kdn/SdhB/CG5028/Idh3b/Idh3a/mAcon1/Irp-1B/Mdh2/Scsalpha1/Fum1/ScsbetaA
GO:BP	ribose phosphate metabolic process	GO:0019693	39/830	181/12175	8.05223e-11	7.83544e-09	6.08645e-09	Gapdh1/blw/ATPsynF/Ald1/ATPsynbeta/ATPsynC/Pfk/ATPsynD/Hex-A/ATPsyngamma/Tpi/Eno/Pgk/sun/ATPsynCF6/ATPsynO/PyK/AMPdeam/Gapdh2/Pdhb/muc/Adk2/ATPsynE/Pglym78/Pdha/AdSS/Ack/Adk3/Aps/Hmgs/ATPsyndelta/ATPsynG/Scox/Papss/bur/Gycbeta100B/fbl/ScsbetaA/Gycalpha99B
GO:BP	nucleobase-containing small molecule metabolic process	GO:0055086	49/830	265/12175	1.02522e-10	9.60666e-09	7.4623e-09	Gapdh1/blw/ATPsynF/Ald1/ATPsynbeta/ATPsynC/Pfk/ATPsynD/CG6330/Hex-A/ATPsyngamma/Tpi/FucT6/Eno/Pgk/sun/ATPsynCF6/ATPsynO/PyK/AMPdeam/Gapdh2/Pdhb/muc/CG6145/Adk2/ATPsynE/Pglym78/Pdha/Nmnat/AdSS/Ack/Adk3/Aps/Hmgs/ATPsyndelta/Oscillin/NTPase/ATPsynG/Scox/Papss/bur/UGP/Gycbeta100B/fbl/CG17896/ScsbetaA/AhcyL1/Gycalpha99B/mmy
GO:BP	cation transport	GO:0006812	61/830	375/12175	1.32455e-10	1.19682e-08	9.29672e-09	Teh1/Atpalpha/blw/ATPsynF/ATPsynbeta/nrv3/ATPsynC/ATPsynD/Fkbp59/Sfxn2/ATPsyngamma/Hk/Vha26/ND-20/Syt4/qvr/sun/porin/ATPsynCF6/levy/mfrn/CG6329/ATPsynO/NKAIN/ATPsynE/CG1090/CG42542/CG42594/Vha68-1/VhaSFD/Ih/Tmem63/CG15270/CG4743/ATPsyndelta/SPoCk/stj/PsGEF/Vha36-1/PMCA/Nckx30C/Fer1HCH/Mid1/ATPsynG/CG1358/dpr3/Vha55/sei/nAChRalpha2/ZnT49B/Hmt-1/CG7781/SK/CG33181/Tpc1/Stim/VhaAC39-1/eag/CG1824/Piez…
GO:BP	nucleoside phosphate metabolic process	GO:0006753	43/830	217/12175	1.50998e-10	1.31733e-08	1.02328e-08	Gapdh1/blw/ATPsynF/Ald1/ATPsynbeta/ATPsynC/Pfk/ATPsynD/CG6330/Hex-A/ATPsyngamma/Tpi/Eno/Pgk/sun/ATPsynCF6/ATPsynO/PyK/AMPdeam/Gapdh2/Pdhb/muc/CG6145/Adk2/ATPsynE/Pglym78/Pdha/Nmnat/AdSS/Ack/Adk3/Aps/Hmgs/ATPsyndelta/NTPase/ATPsynG/Scox/Papss/bur/Gycbeta100B/fbl/ScsbetaA/Gycalpha99B
GO:BP	purine nucleotide metabolic process	GO:0006163	38/830	177/12175	1.57877e-10	1.33143e-08	1.03423e-08	Gapdh1/blw/ATPsynF/Ald1/ATPsynbeta/ATPsynC/Pfk/ATPsynD/Hex-A/ATPsyngamma/Tpi/Eno/Pgk/sun/ATPsynCF6/ATPsynO/PyK/AMPdeam/Gapdh2/Pdhb/muc/Adk2/ATPsynE/Pglym78/Pdha/AdSS/Adk3/Aps/Hmgs/ATPsyndelta/ATPsynG/Scox/Papss/bur/Gycbeta100B/fbl/ScsbetaA/Gycalpha99B
GO:BP	mitochondrial transport	GO:0006839	29/830	111/12175	1.78527e-10	1.45285e-08	1.12855e-08	GC1/ATPsynF/ATPsynbeta/Sfxn2/Hsp60A/Cisd2/CG9399/sun/porin/mfrn/ATPsynO/UQCR-C1/CG5532/Ucp4A/Hsc70-5/CG7382/CG9393/Tom7/Roe1/Tom40/Miro/CG7791/OXA1L/CG4908/Tom70/CG4942/CG8531/AIF/CG3156
GO:BP	organophosphate biosynthetic process	GO:0090407	47/830	252/12175	1.8376e-10	1.45285e-08	1.12855e-08	Argk/blw/ATPsynF/ATPsynbeta/ATPsynC/ATPsynD/ATPsyngamma/Tpi/Pcyt1/sun/elm/ATPsynCF6/ATPsynO/AMPdeam/Pdhb/muc/CG6145/frj/Adk2/ATPsynE/CG2201/Ttc7/Pdha/CG8298/Pect/Nmnat/AdSS/Ack/Adk3/CG7149/Hmgs/ATPsyndelta/Ipp/ATPsynG/Scox/Papss/bur/Gycbeta100B/fbl/Idi/CG7990/nes/Taz/Gk2/cin/PIG-Q/Gycalpha99B
GO:BP	membrane organization	GO:0061024	48/830	262/12175	2.22332e-10	1.70454e-08	1.32406e-08	EndoB/shi/comt/QIL1/Ten-m/Syt4/Fmr1/CG6454/Chchd3/TER94/scramb1/Mitofilin/Arl8/Sec5/crq/Nlg4/alpha-Spec/CG9393/PsGEF/Tom7/CG1902/Arp3/Miro/OXA1L/Vap33/Lam/Snap25/beta-Spec/Syx5/CG4908/Tom70/CG3862/Nrx-IV/shrb/fbl/CG3149/CG4942/EndoA/nes/Taz/Drp1/drpr/CG8531/ArfGAP3/cin/nSyb/Zw10/Syt1
GO:BP	nucleotide metabolic process	GO:0009117	42/830	213/12175	2.9094e-10	2.16494e-08	1.68169e-08	Gapdh1/blw/ATPsynF/Ald1/ATPsynbeta/ATPsynC/Pfk/ATPsynD/CG6330/Hex-A/ATPsyngamma/Tpi/Eno/Pgk/sun/ATPsynCF6/ATPsynO/PyK/AMPdeam/Gapdh2/Pdhb/muc/CG6145/Adk2/ATPsynE/Pglym78/Pdha/Nmnat/AdSS/Ack/Adk3/Aps/Hmgs/ATPsyndelta/ATPsynG/Scox/Papss/bur/Gycbeta100B/fbl/ScsbetaA/Gycalpha99B
GO:BP	carbohydrate derivative biosynthetic process	GO:1901137	51/830	294/12175	4.57457e-10	3.30676e-08	2.56864e-08	blw/ATPsynF/ATPsynbeta/ATPsynC/ATPsynD/ATPsyngamma/FucTA/Tpi/GCS1/FucT6/GlcAT-S/sun/Mgat2/Alg11/ATPsynCF6/ATPsynO/AMPdeam/Pdhb/muc/Adk2/ATPsynE/Pdha/CG8298/AdSS/Ack/Adk3/sff/ATPsyndelta/Oscillin/Uggt/CG6659/Hs6st/ATPsynG/Xxylt/Scox/Papss/bur/Pabp2/Gycbeta100B/fbl/CG3149/sotv/CG31690/CG7990/Sccpdh1/Gk2/Ostgamma/PIG-Q/Gycalpha99B/mmy/GalT1
GO:BP	ion transmembrane transport	GO:0034220	56/830	343/12175	6.77291e-10	4.75985e-08	3.69738e-08	GC1/Atpalpha/blw/ATPsynF/ATPsynbeta/nrv3/ATPsynC/ATPsynD/Sfxn2/ATPsyngamma/Hk/Vha26/ND-20/Mpcp2/CG9399/qvr/sun/porin/ATPsynCF6/levy/mfrn/CG6329/ATPsynO/ATPsynE/CG1090/CG10353/CG42542/CG42594/Vha68-1/VhaSFD/hrm/ATPsyndelta/SPoCk/stj/CG1907/Vha36-1/PMCA/Nckx30C/Fer1HCH/Mid1/ATPsynG/Dic1/Vha55/NaPi-III/nAChRbeta1/sei/nAChRalpha2/CG7781/SK/Tpc1/Stim/VhaAC39-1/eag/CG1824/Piezo/CG14971
GO:BP	synapse organization	GO:0050808	51/830	299/12175	8.44353e-10	5.77355e-08	4.4848e-08	Atpalpha/Frq1/Ten-m/ND-20/futsch/Fmr1/Octbeta2R/RtGEF/Rheb/dpr11/stau/Sac1/sgg/Med/Nmnat/Smg6/Tbce/Tao/sff/Nlg4/alpha-Spec/stj/dpr1/Dad/Arp3/Eps-15/DIP-gamma/Syn1/Vap33/dpr3/p38b/beta-Spec/Imp/Synj/Smu1/Nrx-IV/Atg1/CG13506/Mob2/DIP-theta/bchs/Gad1/LIMK1/Mad/drpr/Syp/DIP-zeta/cin/Syx18/Aplip1/dpr19
GO:BP	cell junction organization	GO:0034330	58/830	367/12175	1.19596e-09	7.96259e-08	6.18521e-08	Atpalpha/shi/Frq1/Ten-m/ND-20/futsch/Fmr1/Octbeta2R/RtGEF/Rheb/wun/dpr11/stau/Sac1/sgg/Med/Nmnat/Smg6/Tbce/Tao/shakB/sff/Nlg4/alpha-Spec/stj/dpr1/Dad/Arp3/Eps-15/arm/DIP-gamma/Syn1/Vap33/dpr3/p38b/beta-Spec/Imp/Synj/Smu1/Nrx-IV/Atg1/CG13506/Cont/Mob2/DIP-theta/bchs/Gad1/LIMK1/Mad/drpr/Syp/DIP-zeta/cin/vari/Syx18/Aplip1/Lac/dpr19
GO:BP	purine-containing compound metabolic process	GO:0072521	39/830	198/12175	1.30922e-09	8.49313e-08	6.59733e-08	Gapdh1/blw/ATPsynF/Ald1/ATPsynbeta/ATPsynC/Pfk/ATPsynD/Hex-A/ATPsyngamma/Tpi/Eno/Pgk/sun/ATPsynCF6/ATPsynO/PyK/AMPdeam/Gapdh2/Pdhb/muc/Adk2/ATPsynE/Pglym78/Pdha/AdSS/Adk3/Aps/Hmgs/ATPsyndelta/ATPsynG/Scox/Papss/bur/Gycbeta100B/fbl/ScsbetaA/AhcyL1/Gycalpha99B
GO:BP	regulation of synapse structure or activity	GO:0050803	37/830	187/12175	3.05676e-09	1.9334e-07	1.50183e-07	shi/Ten-m/ND-20/futsch/Fmr1/Octbeta2R/RtGEF/sif/Rheb/dpr11/stau/sgg/Med/Actbeta/Tbce/Tao/alpha-Spec/stj/Dad/Arp3/Eps-15/DIP-gamma/Syn1/p38b/beta-Spec/Khc-73/Synj/Atg1/Mob2/bchs/Rab3-GAP/EndoA/Mad/drpr/Syp/Aplip1/Syt1
GO:BP	ATP biosynthetic process	GO:0006754	13/830	27/12175	5.12968e-09	3.12834e-07	2.43004e-07	blw/ATPsynF/ATPsynbeta/ATPsynC/ATPsynD/ATPsyngamma/sun/ATPsynCF6/ATPsynO/ATPsynE/ATPsyndelta/ATPsynG/Scox
GO:BP	proton transmembrane transport	GO:1902600	21/830	71/12175	5.22418e-09	3.12834e-07	2.43004e-07	Atpalpha/blw/ATPsynF/ATPsynbeta/ATPsynC/ATPsynD/ATPsyngamma/Vha26/ND-20/sun/ATPsynCF6/levy/ATPsynO/ATPsynE/Vha68-1/VhaSFD/ATPsyndelta/Vha36-1/ATPsynG/Vha55/VhaAC39-1
GO:BP	cation transmembrane transport	GO:0098655	46/830	269/12175	5.31693e-09	3.12834e-07	2.43004e-07	Atpalpha/blw/ATPsynF/ATPsynbeta/nrv3/ATPsynC/ATPsynD/Sfxn2/ATPsyngamma/Hk/Vha26/ND-20/qvr/sun/porin/ATPsynCF6/levy/mfrn/CG6329/ATPsynO/ATPsynE/CG1090/CG42542/CG42594/Vha68-1/VhaSFD/ATPsyndelta/SPoCk/stj/Vha36-1/PMCA/Nckx30C/Fer1HCH/Mid1/ATPsynG/Vha55/sei/nAChRalpha2/CG7781/SK/Tpc1/Stim/VhaAC39-1/eag/CG1824/Piezo
GO:BP	purine ribonucleotide biosynthetic process	GO:0009152	25/830	98/12175	5.51576e-09	3.17156e-07	2.46362e-07	blw/ATPsynF/ATPsynbeta/ATPsynC/ATPsynD/ATPsyngamma/sun/ATPsynCF6/ATPsynO/AMPdeam/Pdhb/muc/Adk2/ATPsynE/Pdha/AdSS/Adk3/ATPsyndelta/ATPsynG/Scox/Papss/bur/Gycbeta100B/fbl/Gycalpha99B
GO:BP	energy coupled proton transport, down electrochemical gradient	GO:0015985	12/830	23/12175	6.25626e-09	3.43888e-07	2.67126e-07	blw/ATPsynF/ATPsynbeta/ATPsynC/ATPsynD/ATPsyngamma/sun/ATPsynCF6/ATPsynO/ATPsynE/ATPsyndelta/ATPsynG
GO:BP	ATP synthesis coupled proton transport	GO:0015986	12/830	23/12175	6.25626e-09	3.43888e-07	2.67126e-07	blw/ATPsynF/ATPsynbeta/ATPsynC/ATPsynD/ATPsyngamma/sun/ATPsynCF6/ATPsynO/ATPsynE/ATPsyndelta/ATPsynG
GO:BP	nucleoside triphosphate biosynthetic process	GO:0009142	15/830	37/12175	6.38843e-09	3.43888e-07	2.67126e-07	blw/ATPsynF/ATPsynbeta/ATPsynC/ATPsynD/ATPsyngamma/sun/ATPsynCF6/ATPsynO/ATPsynE/Ack/Adk3/ATPsyndelta/ATPsynG/Scox
GO:BP	ribonucleotide biosynthetic process	GO:0009260	26/830	106/12175	6.71969e-09	3.54184e-07	2.75124e-07	blw/ATPsynF/ATPsynbeta/ATPsynC/ATPsynD/ATPsyngamma/sun/ATPsynCF6/ATPsynO/AMPdeam/Pdhb/muc/Adk2/ATPsynE/Pdha/AdSS/Ack/Adk3/ATPsyndelta/ATPsynG/Scox/Papss/bur/Gycbeta100B/fbl/Gycalpha99B
GO:BP	homeostatic process	GO:0042592	65/830	455/12175	7.87813e-09	4.06769e-07	3.15971e-07	IscU/mbl/CG14757/Atpalpha/comt/Ald1/nrv3/Pfk/Hex-A/Tpi/Ho/Men-b/Eno/Cisd2/Pgk/CG7430/mfrn/PyK/Npc2a/Nmdar1/Gapdh2/TER94/CG1090/CG42542/SP2353/Rheb/Vha68-1/Egm/Nmnat/Actbeta/AGBE/Tao/shakB/Aps/Irp-1B/Lkb1/SPoCk/SREBP/Trx-2/mew/hppy/PMCA/Nckx30C/Fer1HCH/Csp/Miro/arm/Mid1/IKKepsilon/Scox/Vha55/Miga/Syx5/fbl/Atg1/CkIalpha/NLaz/Trxr-1/Cat/Sara/Stim/VhaAC39-1/Lac/per/AdipoR
GO:BP	inorganic ion transmembrane transport	GO:0098660	47/830	282/12175	8.44604e-09	4.2737e-07	3.31974e-07	Atpalpha/blw/ATPsynF/ATPsynbeta/nrv3/ATPsynC/ATPsynD/ATPsyngamma/Hk/Vha26/ND-20/Mpcp2/qvr/sun/porin/ATPsynCF6/levy/mfrn/CG6329/ATPsynO/ATPsynE/CG1090/CG10353/CG42542/CG42594/Vha68-1/VhaSFD/ATPsyndelta/SPoCk/stj/CG1907/Vha36-1/PMCA/Nckx30C/Fer1HCH/Mid1/ATPsynG/Dic1/Vha55/NaPi-III/sei/CG7781/SK/Stim/VhaAC39-1/eag/CG1824
GO:BP	ribose phosphate biosynthetic process	GO:0046390	26/830	108/12175	1.02526e-08	5.0861e-07	3.9508e-07	blw/ATPsynF/ATPsynbeta/ATPsynC/ATPsynD/ATPsyngamma/sun/ATPsynCF6/ATPsynO/AMPdeam/Pdhb/muc/Adk2/ATPsynE/Pdha/AdSS/Ack/Adk3/ATPsyndelta/ATPsynG/Scox/Papss/bur/Gycbeta100B/fbl/Gycalpha99B
GO:BP	mitochondrial electron transport, NADH to ubiquinone	GO:0006120	11/830	20/12175	1.31634e-08	6.40452e-07	4.97493e-07	ND-B14.5B/ND-49/ND-19/ND-B14.5A/ND-42/ND-B22/ND-23/ND-B17/ND-51/ND-24/ND-ASHI
GO:BP	ribonucleoside triphosphate metabolic process	GO:0009199	14/830	34/12175	1.6184e-08	7.58249e-07	5.88996e-07	blw/ATPsynF/ATPsynbeta/ATPsynC/ATPsynD/ATPsyngamma/sun/ATPsynCF6/ATPsynO/ATPsynE/Ack/ATPsyndelta/ATPsynG/Scox
GO:BP	ribonucleoside triphosphate biosynthetic process	GO:0009201	14/830	34/12175	1.6184e-08	7.58249e-07	5.88996e-07	blw/ATPsynF/ATPsynbeta/ATPsynC/ATPsynD/ATPsyngamma/sun/ATPsynCF6/ATPsynO/ATPsynE/Ack/ATPsyndelta/ATPsynG/Scox
GO:BP	trans-synaptic signaling	GO:0099537	50/830	316/12175	1.65271e-08	7.60247e-07	5.90547e-07	Atpalpha/shi/comt/P32/Frq1/Sod2/alphaSnap/Ten-m/Syt4/Pgk/qvr/gammaSnap2/Arf51F/Fmr1/CG6329/Nmdar1/scramb1/Nmnat/Ih/Smg6/Tbce/Arl8/Sec5/Nlg4/alpha-Spec/stj/Ipp/Csp/Vap33/Rop/Snap25/beta-Spec/Syx5/nAChRbeta1/Smu1/inaE/nAChRalpha2/Gycbeta100B/Atg1/Rab3-GAP/X11Lbeta/Mctp/CG7781/Cat/5-HT7/Syngr/Syp/Syx18/nSyb/Syt1
GO:BP	purine nucleotide biosynthetic process	GO:0006164	25/830	104/12175	2.03131e-08	9.17719e-07	7.12869e-07	blw/ATPsynF/ATPsynbeta/ATPsynC/ATPsynD/ATPsyngamma/sun/ATPsynCF6/ATPsynO/AMPdeam/Pdhb/muc/Adk2/ATPsynE/Pdha/AdSS/Adk3/ATPsyndelta/ATPsynG/Scox/Papss/bur/Gycbeta100B/fbl/Gycalpha99B
GO:BP	nucleoside triphosphate metabolic process	GO:0009141	15/830	40/12175	2.26095e-08	1.00355e-06	7.79538e-07	blw/ATPsynF/ATPsynbeta/ATPsynC/ATPsynD/ATPsyngamma/sun/ATPsynCF6/ATPsynO/ATPsynE/Ack/Adk3/ATPsyndelta/ATPsynG/Scox
GO:BP	nucleotide biosynthetic process	GO:0009165	28/830	129/12175	3.20553e-08	1.39828e-06	1.08616e-06	blw/ATPsynF/ATPsynbeta/ATPsynC/ATPsynD/ATPsyngamma/sun/ATPsynCF6/ATPsynO/AMPdeam/Pdhb/muc/CG6145/Adk2/ATPsynE/Pdha/Nmnat/AdSS/Ack/Adk3/ATPsyndelta/ATPsynG/Scox/Papss/bur/Gycbeta100B/fbl/Gycalpha99B
GO:BP	pyruvate metabolic process	GO:0006090	15/830	41/12175	3.3425e-08	1.43331e-06	1.11337e-06	Gapdh1/Ald1/Pfk/Hex-A/Tpi/Men-b/Eno/Pgk/PyK/Gapdh2/Pdhb/muc/Pglym78/Pdha/PCB
GO:BP	chemical synaptic transmission	GO:0007268	49/830	314/12175	3.62439e-08	1.50323e-06	1.16768e-06	Atpalpha/shi/comt/P32/Frq1/Sod2/alphaSnap/Ten-m/Syt4/Pgk/qvr/gammaSnap2/Arf51F/Fmr1/CG6329/Nmdar1/scramb1/Nmnat/Ih/Smg6/Tbce/Arl8/Sec5/Nlg4/alpha-Spec/stj/Ipp/Csp/Vap33/Rop/Snap25/beta-Spec/Syx5/nAChRbeta1/Smu1/nAChRalpha2/Gycbeta100B/Atg1/Rab3-GAP/X11Lbeta/Mctp/CG7781/Cat/5-HT7/Syngr/Syp/Syx18/nSyb/Syt1
GO:BP	anterograde trans-synaptic signaling	GO:0098916	49/830	314/12175	3.62439e-08	1.50323e-06	1.16768e-06	Atpalpha/shi/comt/P32/Frq1/Sod2/alphaSnap/Ten-m/Syt4/Pgk/qvr/gammaSnap2/Arf51F/Fmr1/CG6329/Nmdar1/scramb1/Nmnat/Ih/Smg6/Tbce/Arl8/Sec5/Nlg4/alpha-Spec/stj/Ipp/Csp/Vap33/Rop/Snap25/beta-Spec/Syx5/nAChRbeta1/Smu1/nAChRalpha2/Gycbeta100B/Atg1/Rab3-GAP/X11Lbeta/Mctp/CG7781/Cat/5-HT7/Syngr/Syp/Syx18/nSyb/Syt1
GO:BP	synaptic signaling	GO:0099536	50/830	324/12175	3.78961e-08	1.53635e-06	1.19341e-06	Atpalpha/shi/comt/P32/Frq1/Sod2/alphaSnap/Ten-m/Syt4/Pgk/qvr/gammaSnap2/Arf51F/Fmr1/CG6329/Nmdar1/scramb1/Nmnat/Ih/Smg6/Tbce/Arl8/Sec5/Nlg4/alpha-Spec/stj/Ipp/Csp/Vap33/Rop/Snap25/beta-Spec/Syx5/nAChRbeta1/Smu1/inaE/nAChRalpha2/Gycbeta100B/Atg1/Rab3-GAP/X11Lbeta/Mctp/CG7781/Cat/5-HT7/Syngr/Syp/Syx18/nSyb/Syt1
GO:BP	nucleoside phosphate biosynthetic process	GO:1901293	28/830	130/12175	3.8257e-08	1.53635e-06	1.19341e-06	blw/ATPsynF/ATPsynbeta/ATPsynC/ATPsynD/ATPsyngamma/sun/ATPsynCF6/ATPsynO/AMPdeam/Pdhb/muc/CG6145/Adk2/ATPsynE/Pdha/Nmnat/AdSS/Ack/Adk3/ATPsyndelta/ATPsynG/Scox/Papss/bur/Gycbeta100B/fbl/Gycalpha99B
GO:BP	purine nucleoside triphosphate biosynthetic process	GO:0009145	13/830	31/12175	4.0815e-08	1.56457e-06	1.21534e-06	blw/ATPsynF/ATPsynbeta/ATPsynC/ATPsynD/ATPsyngamma/sun/ATPsynCF6/ATPsynO/ATPsynE/ATPsyndelta/ATPsynG/Scox
GO:BP	purine ribonucleoside triphosphate metabolic process	GO:0009205	13/830	31/12175	4.0815e-08	1.56457e-06	1.21534e-06	blw/ATPsynF/ATPsynbeta/ATPsynC/ATPsynD/ATPsyngamma/sun/ATPsynCF6/ATPsynO/ATPsynE/ATPsyndelta/ATPsynG/Scox
GO:BP	purine ribonucleoside triphosphate biosynthetic process	GO:0009206	13/830	31/12175	4.0815e-08	1.56457e-06	1.21534e-06	blw/ATPsynF/ATPsynbeta/ATPsynC/ATPsynD/ATPsyngamma/sun/ATPsynCF6/ATPsynO/ATPsynE/ATPsyndelta/ATPsynG/Scox
GO:BP	inorganic cation transmembrane transport	GO:0098662	42/830	250/12175	4.19134e-08	1.5827e-06	1.22942e-06	Atpalpha/blw/ATPsynF/ATPsynbeta/nrv3/ATPsynC/ATPsynD/ATPsyngamma/Hk/Vha26/ND-20/qvr/sun/porin/ATPsynCF6/levy/mfrn/CG6329/ATPsynO/ATPsynE/CG1090/CG42542/CG42594/Vha68-1/VhaSFD/ATPsyndelta/SPoCk/stj/Vha36-1/PMCA/Nckx30C/Fer1HCH/Mid1/ATPsynG/Vha55/sei/CG7781/SK/Stim/VhaAC39-1/eag/CG1824
GO:BP	regulation of smoothened signaling pathway	GO:0008589	22/830	87/12175	5.39126e-08	2.00587e-06	1.55812e-06	Usp7/TER94/PPP4R2r/Sac1/sgg/flw/slmb/rdx/tws/Herc4/CG14182/Cul1/bur/Synj/Npl4/Hrs/Tnpo/sotv/CkIalpha/Cul4/pic/apolpp
GO:BP	neuromuscular junction development	GO:0007528	34/830	182/12175	5.95066e-08	2.18191e-06	1.69487e-06	Atpalpha/Frq1/Ten-m/futsch/Fmr1/Octbeta2R/Rheb/dpr11/stau/sgg/Med/Tbce/Tao/sff/alpha-Spec/stj/Dad/Arp3/Eps-15/DIP-gamma/Syn1/Vap33/beta-Spec/Imp/Smu1/Atg1/Mob2/Gad1/LIMK1/Mad/drpr/Syp/cin/Syx18
GO:BP	purine nucleoside triphosphate metabolic process	GO:0009144	13/830	32/12175	6.44754e-08	2.33033e-06	1.81016e-06	blw/ATPsynF/ATPsynbeta/ATPsynC/ATPsynD/ATPsyngamma/sun/ATPsynCF6/ATPsynO/ATPsynE/ATPsyndelta/ATPsynG/Scox
GO:BP	purine-containing compound biosynthetic process	GO:0072522	25/830	112/12175	9.78285e-08	3.486e-06	2.70787e-06	blw/ATPsynF/ATPsynbeta/ATPsynC/ATPsynD/ATPsyngamma/sun/ATPsynCF6/ATPsynO/AMPdeam/Pdhb/muc/Adk2/ATPsynE/Pdha/AdSS/Adk3/ATPsyndelta/ATPsynG/Scox/Papss/bur/Gycbeta100B/fbl/Gycalpha99B
GO:BP	negative regulation of smoothened signaling pathway	GO:0045879	16/830	51/12175	1.40747e-07	4.94568e-06	3.84173e-06	TER94/PPP4R2r/Sac1/sgg/flw/slmb/rdx/Herc4/CG14182/Cul1/Synj/Npl4/Hrs/CkIalpha/Cul4/pic
GO:BP	regulation of catabolic process	GO:0009894	44/830	280/12175	1.48378e-07	5.14242e-06	3.99455e-06	shi/Sod2/bsf/Fmr1/CG4238/TER94/Lon/Rheb/Rpn3/Rpn1/sgg/Actbeta/CG3632/Smg6/bol/Acn/Ufl1/slmb/Rpn2/Lkb1/rdx/SREBP/Rnf146/Traf6/Bruce/ari-1/CG8155/Cul1/HUWE1/Synj/schlank/AMPKalpha/Pabp2/CG15445/GlyS/Atg1/CycC/CkIalpha/PAN2/Cul4/Pop2/CG4619/CG9951/pic
GO:BP	smoothened signaling pathway	GO:0007224	22/830	92/12175	1.57997e-07	5.24478e-06	4.07406e-06	Usp7/TER94/PPP4R2r/Sac1/sgg/flw/slmb/rdx/tws/Herc4/CG14182/Cul1/bur/Synj/Npl4/Hrs/Tnpo/sotv/CkIalpha/Cul4/pic/apolpp
GO:BP	vesicle-mediated transport in synapse	GO:0099003	24/830	107/12175	1.5981e-07	5.24478e-06	4.07406e-06	shi/comt/alphaSnap/Syt4/gammaSnap2/Arf51F/Fmr1/Dap160/Sec5/Nlg4/stj/Csp/Eps-15/Vap33/Rop/Snap25/Syx5/Synj/EndoA/Drp1/Vps35/Syngr/nSyb/Syt1
GO:BP	synaptic vesicle cycle	GO:0099504	24/830	107/12175	1.5981e-07	5.24478e-06	4.07406e-06	shi/comt/alphaSnap/Syt4/gammaSnap2/Arf51F/Fmr1/Dap160/Sec5/Nlg4/stj/Csp/Eps-15/Vap33/Rop/Snap25/Syx5/Synj/EndoA/Drp1/Vps35/Syngr/nSyb/Syt1
GO:BP	purine nucleoside diphosphate metabolic process	GO:0009135	12/830	29/12175	1.6377e-07	5.24478e-06	4.07406e-06	Gapdh1/Ald1/Pfk/Hex-A/Tpi/Eno/Pgk/PyK/Gapdh2/Adk2/Pglym78/Adk3
GO:BP	purine ribonucleoside diphosphate metabolic process	GO:0009179	12/830	29/12175	1.6377e-07	5.24478e-06	4.07406e-06	Gapdh1/Ald1/Pfk/Hex-A/Tpi/Eno/Pgk/PyK/Gapdh2/Adk2/Pglym78/Adk3
GO:BP	ADP metabolic process	GO:0046031	12/830	29/12175	1.6377e-07	5.24478e-06	4.07406e-06	Gapdh1/Ald1/Pfk/Hex-A/Tpi/Eno/Pgk/PyK/Gapdh2/Adk2/Pglym78/Adk3
GO:BP	carbohydrate metabolic process	GO:0005975	43/830	272/12175	1.73147e-07	5.47579e-06	4.2535e-06	Gapdh1/Ald1/Pfk/Hex-A/alpha-Man-Ib/Tpi/GCS1/Gabat/Mdh1/Eno/GlcAT-S/Pgk/Mgat2/kdn/PyK/CG7766/Gapdh2/Pglym78/Atg3/CG8298/sgg/Actbeta/AGBE/GCS2alpha/Oscillin/Mdh2/Ipp/Gpdh1/Gbs-76A/Imp/Synj/UGP/CG9008/GlyS/CG6650/Atg1/sotv/PCB/CG6805/alpha-Man-IIa/Pgm1/Gk2/CG6218
GO:BP	axo-dendritic transport	GO:0008088	14/830	42/12175	3.67489e-07	1.1443e-05	8.88875e-06	Marf/Fmr1/Khc/Dlic/Sac1/Arl8/Miro/milt/Vap33/BORCS5/Atg1/Kap3/Kif3C/Aplip1
GO:BP	chemical homeostasis	GO:0048878	44/830	289/12175	3.70881e-07	1.1443e-05	8.88875e-06	IscU/CG14757/Atpalpha/Ald1/nrv3/Pfk/Hex-A/Tpi/Ho/Men-b/Eno/Cisd2/mfrn/PyK/Npc2a/Nmdar1/Gapdh2/CG1090/CG42542/Rheb/Vha68-1/Egm/Actbeta/AGBE/shakB/Aps/Irp-1B/Lkb1/SPoCk/SREBP/hppy/PMCA/Nckx30C/Fer1HCH/Mid1/Scox/Vha55/Syx5/fbl/CkIalpha/NLaz/Stim/VhaAC39-1/AdipoR
GO:BP	ribonucleoside diphosphate metabolic process	GO:0009185	12/830	31/12175	3.92077e-07	1.19513e-05	9.28355e-06	Gapdh1/Ald1/Pfk/Hex-A/Tpi/Eno/Pgk/PyK/Gapdh2/Adk2/Pglym78/Adk3
GO:BP	mitochondrial transmembrane transport	GO:1990542	19/830	75/12175	4.21525e-07	1.26959e-05	9.86201e-06	GC1/ATPsynF/ATPsynbeta/Sfxn2/Hsp60A/CG9399/sun/porin/mfrn/ATPsynO/Hsc70-5/CG7382/Tom7/Roe1/Tom40/Tom70/CG8531/AIF/CG3156
GO:BP	positive regulation of protein metabolic process	GO:0051247	38/830	234/12175	4.52147e-07	1.3458e-05	1.0454e-05	Mkrn1/lncRNA:Hsromega/Fmr1/CG4238/Dap160/SCCRO/Cyt-c-p/TER94/Lon/Rheb/Lk6/sgg/Actbeta/bol/slmb/rdx/Rnf146/ari-1/Ccm3/IKKepsilon/Cul1/spoon/HtrA2/HUWE1/Pabp2/fry/CkIalpha/Mob2/ScsbetaA/rswl/Cul4/Lpt/CG9951/CG9098/pic/Rabex-5/Dp1/mmy
GO:BP	nucleoside diphosphate metabolic process	GO:0009132	13/830	38/12175	6.84633e-07	2.01409e-05	1.56452e-05	Gapdh1/Ald1/Pfk/Hex-A/Tpi/Eno/Pgk/PyK/Gapdh2/Adk2/Pglym78/Adk3/NTPase
GO:BP	regulation of synapse organization	GO:0050807	29/830	157/12175	7.11697e-07	2.06965e-05	1.60767e-05	Ten-m/ND-20/futsch/Fmr1/Octbeta2R/RtGEF/Rheb/dpr11/stau/sgg/Med/Tbce/Tao/alpha-Spec/stj/Dad/Arp3/Eps-15/DIP-gamma/Syn1/p38b/beta-Spec/Atg1/Mob2/bchs/Mad/drpr/Syp/Aplip1
GO:BP	synaptic vesicle transport	GO:0048489	10/830	23/12175	1.03889e-06	2.9868e-05	2.3201e-05	shi/Fmr1/Khc/Miro/Rop/Snap25/BORCS5/Drp1/Syngr/Aplip1
GO:BP	monocarboxylic acid metabolic process	GO:0032787	31/830	181/12175	1.62898e-06	4.63069e-05	3.59705e-05	Gapdh1/Ald1/Pfk/Hex-A/Tpi/Gabat/Men-b/Ssadh/Eno/Pgk/ND-ACP/PyK/Gapdh2/Pdhb/muc/Las/Pglym78/Pdha/Egm/CG7920/SREBP/CG12170/CG16935/Sc2/CG3961/PCB/beg/Gad1/Mtpbeta/AdipoR/CG8778
GO:BP	carbohydrate homeostasis	GO:0033500	15/830	55/12175	2.54473e-06	7.15352e-05	5.55674e-05	Ald1/Pfk/Hex-A/Tpi/Men-b/Eno/PyK/Gapdh2/Rheb/Actbeta/Aps/Lkb1/CkIalpha/NLaz/AdipoR
GO:BP	protein-containing complex disassembly	GO:0032984	19/830	85/12175	3.26535e-06	9.07839e-05	7.05195e-05	comt/alphaSnap/futsch/Vps28/Khc/TER94/CG6094/aux/Vps4/flw/alpha-Spec/stj/CG8155/mRF1/tmod/beta-Spec/cpa/LRR/pix
GO:BP	mitochondrial membrane organization	GO:0007006	13/830	43/12175	3.36041e-06	9.24114e-05	7.17837e-05	QIL1/Chchd3/Mitofilin/CG9393/Tom7/Miro/OXA1L/CG4908/Tom70/CG3862/CG4942/Taz/CG8531
GO:BP	endocytosis	GO:0006897	29/830	170/12175	3.81143e-06	0.000103687	8.05427e-05	shi/LpR2/Pcyt1/Tsp42Ej/Arf51F/LpR1/Dap160/CG2258/CG9132/CG18659/aux/Tao/numb/crq/Nlg4/stj/Eps-15/Reps/ArfGAP1/Synj/Hip1/Hrs/EndoA/Drp1/drpr/Vps35/spri/Nak/Syt1
GO:BP	synaptic vesicle localization	GO:0097479	10/830	26/12175	3.99543e-06	0.000107537	8.35327e-05	shi/Fmr1/Khc/Miro/Rop/Snap25/BORCS5/Drp1/Syngr/Aplip1
GO:BP	transport along microtubule	GO:0010970	18/830	79/12175	4.41782e-06	0.000117654	9.13914e-05	Marf/Fmr1/Khc/nudE/Dlic/Sac1/Arl8/dop/Miro/milt/Vap33/Khc-73/BORCS5/Oseg6/Atg1/Kap3/Kif3C/Aplip1
GO:BP	cellular component disassembly	GO:0022411	27/830	154/12175	4.81365e-06	0.00012686	9.85425e-05	comt/Sod2/alphaSnap/futsch/Vps28/Fmr1/Khc/TER94/Atg3/Hsc70-5/CG6094/aux/Vps4/flw/Drep4/alpha-Spec/SREBP/stj/CG8155/mRF1/CG5676/tmod/beta-Spec/Atg1/cpa/LRR/pix
GO:BP	phosphorylation	GO:0016310	53/830	412/12175	5.17038e-06	0.000134856	0.000104754	Argk/Gapdh1/shi/Ald1/Pfk/Hex-A/Tpi/CG8485/Eno/Pgk/Dap160/PyK/Gapdh2/CG4629/Cdc2rk/Wee1/Pglym78/Dgkepsilon/Lk6/aux/CG8298/sgg/Actbeta/Ack/PKD/Tao/sff/SRPK/Lkb1/hppy/Dad/dop/S6KL/Ccm3/Btk29A/IKKepsilon/p38b/Sik2/CG14408/AMPKalpha/Atg1/fry/CkIalpha/Mob2/gek/LIMK1/Gk2/CG6218/Cerk/Nak/CG9098/per/Cdk12
GO:BP	establishment of vesicle localization	GO:0051650	15/830	58/12175	5.2469e-06	0.000135456	0.00010522	shi/Fmr1/Khc/nudE/Sec5/Miro/milt/Rop/Snap25/Khc-73/BORCS5/Drp1/Syngr/ArfGAP3/Aplip1
GO:BP	neuron recognition	GO:0008038	22/830	112/12175	5.48351e-06	0.000140134	0.000108854	Ten-m/CG5758/Fmr1/Npc2a/RhoGAP93B/beat-Ic/Sac1/robo3/alpha-Spec/mew/Arp3/beat-Ia/beta-Spec/Nrx-IV/fry/Cont/bchs/gek/Pvf3/Fas1/mmy/tutl
GO:BP	glucose homeostasis	GO:0042593	13/830	45/12175	5.90401e-06	0.000147831	0.000114833	Ald1/Pfk/Hex-A/Tpi/Men-b/Eno/PyK/Gapdh2/Actbeta/Aps/Lkb1/CkIalpha/AdipoR
GO:BP	glycolytic process	GO:0006096	10/830	27/12175	5.96e-06	0.000147831	0.000114833	Gapdh1/Ald1/Pfk/Hex-A/Tpi/Eno/Pgk/PyK/Gapdh2/Pglym78
GO:BP	ATP generation from ADP	GO:0006757	10/830	27/12175	5.96e-06	0.000147831	0.000114833	Gapdh1/Ald1/Pfk/Hex-A/Tpi/Eno/Pgk/PyK/Gapdh2/Pglym78
GO:BP	cellular lipid metabolic process	GO:0044255	51/830	394/12175	6.53348e-06	0.000160483	0.00012466	GlcAT-S/Pcyt1/ND-ACP/elm/Alg11/frj/Las/CG2201/Ttc7/CG14411/wun/Dgkepsilon/CG30491/CG8298/Sac1/Pect/Egm/PGAP1/Ack/CG3632/ghi/CG7920/CG7149/Lkb1/Hmgs/SREBP/CG12170/Ipp/Gpdh1/Vap33/CG16935/CG3009/Sc2/INPP5E/Synj/schlank/CG3149/Idi/CG3961/CG6805/CG7990/beg/nes/Taz/Sccpdh1/Gk2/Cerk/Mtpbeta/PIG-Q/AdipoR/CG8778
GO:BP	aging	GO:0007568	29/830	175/12175	6.87255e-06	0.000167188	0.000129869	Atpalpha/ATPsynD/SdhC/Sod2/Tpi/ND-20/Cisd2/Pcyt1/sun/levy/Mnn1/VhaSFD/ND-SGDH/Rpn1/AGBE/Lkb1/Trx-2/Prosalpha6/CG8155/Btk29A/p38b/Lam/miple2/NLaz/Trxr-1/Cat/Sirt2/Mtpbeta/per
GO:BP	microtubule-based transport	GO:0099111	18/830	82/12175	7.73317e-06	0.000185123	0.0001438	Marf/Fmr1/Khc/nudE/Dlic/Sac1/Arl8/dop/Miro/milt/Vap33/Khc-73/BORCS5/Oseg6/Atg1/Kap3/Kif3C/Aplip1
GO:BP	protein polymerization	GO:0051258	21/830	106/12175	7.75612e-06	0.000185123	0.0001438	Arpc3A/shi/SelR/Vrp1/Khc/ALiX/nudE/Tbce/PsGEF/Arp3/Btk29A/spoon/p38b/Lam/tmod/ens/Efa6/cpa/gek/LRR/Grip163
GO:BP	establishment of protein localization	GO:0045184	59/830	488/12175	1.07709e-05	0.000254678	0.000197829	comt/Trp1/GABPI/alphaSnap/Hsp60A/Vps28/gammaSnap2/Arf51F/TBC1D16/CG6454/app/UQCR-C1/deltaCOP/TSG101/Hsc70-5/RN-tre/sgg/CG7382/RabX1/Stam/CG34404/Arl8/Sec5/CG9393/rdx/AP-1sigma/Tom7/Roe1/Tom40/Arp3/SrpRalpha/GAPcenA/CG7791/nmd/CG8155/milt/OXA1L/Rop/Syx5/CG4908/Tom70/Vps29/Snx3/betaCOP/Hrs/Tnpo/CG4942/Snx21/Hph/Snx17/Pex19/CG8531/AIF/Vps35/msk/Leash/apolpp/Cow/AdipoR
GO:BP	cell recognition	GO:0008037	22/830	117/12175	1.14493e-05	0.00026575	0.00020643	Ten-m/CG5758/Fmr1/Npc2a/RhoGAP93B/beat-Ic/Sac1/robo3/alpha-Spec/mew/Arp3/beat-Ia/beta-Spec/Nrx-IV/fry/Cont/bchs/gek/Pvf3/Fas1/mmy/tutl
GO:BP	regulation of neuromuscular junction development	GO:1904396	22/830	117/12175	1.14493e-05	0.00026575	0.00020643	futsch/Fmr1/Octbeta2R/Rheb/dpr11/stau/sgg/Med/Tbce/Tao/alpha-Spec/stj/Dad/Arp3/Eps-15/DIP-gamma/Syn1/beta-Spec/Mob2/Mad/drpr/Syp
GO:BP	intracellular protein transport	GO:0006886	46/830	350/12175	1.24629e-05	0.000286646	0.000222662	Trp1/GABPI/alphaSnap/Hsp60A/Vps28/gammaSnap2/Arf51F/TBC1D16/CG6454/app/UQCR-C1/Hsc70-5/RN-tre/sgg/CG7382/RabX1/Stam/CG9393/rdx/AP-1sigma/Tom7/Roe1/Tom40/Arp3/SrpRalpha/GAPcenA/CG7791/CG8155/milt/OXA1L/Rop/Syx5/CG4908/Tom70/Vps29/betaCOP/Hrs/Tnpo/CG4942/Hph/Snx17/Pex19/CG8531/AIF/Vps35/msk
GO:BP	dicarboxylic acid metabolic process	GO:0043648	11/830	35/12175	1.26592e-05	0.000286739	0.000222735	slgA/CG9674/P5CDh1/SdhA/Gabat/Men-b/Mdh1/Gdh/GLS/Fum1/Gad1
GO:BP	vesicle localization	GO:0051648	15/830	62/12175	1.26936e-05	0.000286739	0.000222735	shi/Fmr1/Khc/nudE/Sec5/Miro/milt/Rop/Snap25/Khc-73/BORCS5/Drp1/Syngr/ArfGAP3/Aplip1
GO:BP	protein localization to mitochondrion	GO:0070585	15/830	63/12175	1.56252e-05	0.000346769	0.000269365	Hsp60A/UQCR-C1/Hsc70-5/CG7382/CG9393/Tom7/Roe1/Tom40/CG7791/OXA1L/CG4908/Tom70/CG4942/CG8531/AIF
GO:BP	establishment of protein localization to mitochondrion	GO:0072655	15/830	63/12175	1.56252e-05	0.000346769	0.000269365	Hsp60A/UQCR-C1/Hsc70-5/CG7382/CG9393/Tom7/Roe1/Tom40/CG7791/OXA1L/CG4908/Tom70/CG4942/CG8531/AIF
GO:BP	determination of adult lifespan	GO:0008340	27/830	166/12175	2.00349e-05	0.000440768	0.000342382	Atpalpha/ATPsynD/SdhC/Sod2/Tpi/ND-20/Pcyt1/sun/levy/Mnn1/VhaSFD/ND-SGDH/Rpn1/AGBE/Lkb1/Trx-2/Prosalpha6/CG8155/Btk29A/p38b/miple2/NLaz/Trxr-1/Cat/Sirt2/Mtpbeta/per
GO:BP	regulation of organelle organization	GO:0033043	43/830	325/12175	2.02483e-05	0.000441623	0.000343046	Arpc3A/shi/QIL1/Sod2/Marf/futsch/Syt4/CG6454/Vrp1/stau/sgg/Sec5/slmb/alpha-Spec/SREBP/tws/PsGEF/Arp3/Ggamma1/Miro/Ccm3/CG8155/Btk29A/IKKepsilon/Cul1/spoon/pigs/p38b/Lam/Miga/tmod/beta-Spec/Synj/Efa6/Cdc27/cpa/CG9231/gek/Drp1/rux/LRR/Zw10/Syt1
GO:BP	regulation of protein catabolic process	GO:0042176	19/830	96/12175	2.11245e-05	0.000456796	0.000354831	CG4238/TER94/Lon/Rpn3/Rpn1/sgg/Ufl1/slmb/Rpn2/rdx/Rnf146/ari-1/Cul1/HUWE1/CG15445/CkIalpha/Cul4/CG9951/pic
GO:BP	protein transport	GO:0015031	56/830	467/12175	2.29243e-05	0.000491513	0.000381799	comt/Trp1/GABPI/alphaSnap/Hsp60A/Vps28/gammaSnap2/Arf51F/TBC1D16/CG6454/app/UQCR-C1/deltaCOP/TSG101/Hsc70-5/RN-tre/sgg/CG7382/RabX1/Stam/Arl8/Sec5/CG9393/rdx/AP-1sigma/Tom7/Roe1/Tom40/Arp3/SrpRalpha/GAPcenA/CG7791/CG8155/milt/OXA1L/Rop/Syx5/CG4908/Tom70/Vps29/Snx3/betaCOP/Hrs/Tnpo/CG4942/Snx21/Hph/Snx17/Pex19/CG8531/AIF/Vps35/msk/Leash/apolpp/AdipoR
GO:BP	synaptic assembly at neuromuscular junction	GO:0051124	24/830	140/12175	2.36016e-05	0.000501782	0.000389776	Atpalpha/Ten-m/futsch/Fmr1/Octbeta2R/Rheb/stau/sgg/Med/Tbce/Tao/alpha-Spec/stj/Dad/Arp3/Eps-15/Syn1/beta-Spec/Imp/Atg1/Mob2/LIMK1/Mad/Syp
GO:BP	axon development	GO:0061564	44/830	338/12175	2.43826e-05	0.000514067	0.000399319	SelR/Ten-m/Gclc/futsch/Fmr1/Khc/RhoGAP93B/nudE/sif/Rheb/Dlic/dpr11/beat-Ic/Sac1/Med/robo3/sff/alpha-Spec/AP-1sigma/mew/Dad/side/Arp3/DIP-gamma/beat-Ia/not/HUWE1/beta-Spec/Imp/bur/AMPKalpha/Atg1/Cont/bchs/LRP1/LIMK1/vvl/hts/spri/beat-VI/Fas1/Ptp4E/mmy/tutl
GO:BP	positive regulation of cellular protein metabolic process	GO:0032270	32/830	216/12175	2.5292e-05	0.000528833	0.000410789	Mkrn1/lncRNA:Hsromega/Fmr1/Dap160/SCCRO/Cyt-c-p/TER94/Rheb/Lk6/sgg/Actbeta/bol/slmb/Rnf146/ari-1/Ccm3/IKKepsilon/Cul1/spoon/HtrA2/Pabp2/fry/CkIalpha/Mob2/ScsbetaA/rswl/Lpt/CG9951/CG9098/Rabex-5/Dp1/mmy
GO:BP	neuromuscular synaptic transmission	GO:0007274	17/830	81/12175	2.56891e-05	0.000532733	0.000413818	comt/P32/alphaSnap/Ten-m/Fmr1/Nmnat/Smg6/Tbce/alpha-Spec/stj/Csp/Snap25/beta-Spec/Smu1/Syp/Syx18/Syt1
GO:BP	glutamate metabolic process	GO:0006536	7/830	15/12175	2.64433e-05	0.000543915	0.000422504	slgA/CG9674/P5CDh1/Gabat/Gdh/GLS/Gad1
GO:BP	ubiquitin-dependent protein catabolic process	GO:0006511	43/830	329/12175	2.73197e-05	0.000557409	0.000432986	alpha-Man-Ib/Ate1/Usp7/Vps28/CG4238/Rpn7/TER94/ALiX/RYBP/Rpn3/Rpn1/sgg/CG9003/Stam/Ufl1/gcl/CG8188/slmb/Rpn2/rdx/Rnf146/Usp30/Der-2/ari-1/Prosalpha6/Herc4/Cul1/not/HUWE1/Rpn6/CG1317/Prosalpha3/shrb/Npl4/CG15445/Cdc27/CkIalpha/Cul4/Ltn1/CG9951/inc/pic/Kdm2
GO:BP	multicellular organism aging	GO:0010259	27/830	169/12175	2.78511e-05	0.000563706	0.000437878	Atpalpha/ATPsynD/SdhC/Sod2/Tpi/ND-20/Pcyt1/sun/levy/Mnn1/VhaSFD/ND-SGDH/Rpn1/AGBE/Lkb1/Trx-2/Prosalpha6/CG8155/Btk29A/p38b/miple2/NLaz/Trxr-1/Cat/Sirt2/Mtpbeta/per
GO:BP	regulation of ion transport	GO:0043269	16/830	74/12175	2.99566e-05	0.000598489	0.000464897	Teh1/Fkbp59/Hk/Syt4/qvr/porin/levy/CG6329/NKAIN/Ih/stj/PsGEF/CG7781/Stim/eag/Syt1
GO:BP	signal release	GO:0023061	24/830	142/12175	3.00427e-05	0.000598489	0.000464897	comt/Frq1/alphaSnap/Syt4/gammaSnap2/Arf51F/Ih/Arl8/Sec5/PsGEF/Csp/Vap33/Rop/Snap25/Syx5/Snx3/Hrs/Rab3-GAP/Mctp/Vps35/Syngr/nSyb/Syt1/AdipoR
GO:BP	nucleoside diphosphate phosphorylation	GO:0006165	10/830	32/12175	3.33285e-05	0.000658759	0.000511714	Gapdh1/Ald1/Pfk/Hex-A/Tpi/Eno/Pgk/PyK/Gapdh2/Pglym78
GO:BP	NADH metabolic process	GO:0006734	6/830	11/12175	3.38421e-05	0.000663725	0.000515571	Pfk/Mdh1/Eno/Gpo1/Gdh/Gpdh1
GO:BP	cytoskeleton-dependent intracellular transport	GO:0030705	18/830	91/12175	3.48951e-05	0.000679113	0.000527524	Marf/Fmr1/Khc/nudE/Dlic/Sac1/Arl8/dop/Miro/milt/Vap33/Khc-73/BORCS5/Oseg6/Atg1/Kap3/Kif3C/Aplip1
GO:BP	modification-dependent protein catabolic process	GO:0019941	43/830	333/12175	3.65938e-05	0.000706735	0.000548981	alpha-Man-Ib/Ate1/Usp7/Vps28/CG4238/Rpn7/TER94/ALiX/RYBP/Rpn3/Rpn1/sgg/CG9003/Stam/Ufl1/gcl/CG8188/slmb/Rpn2/rdx/Rnf146/Usp30/Der-2/ari-1/Prosalpha6/Herc4/Cul1/not/HUWE1/Rpn6/CG1317/Prosalpha3/shrb/Npl4/CG15445/Cdc27/CkIalpha/Cul4/Ltn1/CG9951/inc/pic/Kdm2
GO:BP	cellular macromolecule catabolic process	GO:0044265	58/830	499/12175	4.07576e-05	0.000781186	0.000606813	alpha-Man-Ib/Ate1/Usp7/bsf/Vps28/Fmr1/CG4238/Rpn7/TER94/ALiX/Lon/RYBP/Rpn3/Rpn1/sgg/CG9003/Smg6/bol/Stam/Ufl1/gcl/Tudor-SN/CG8188/slmb/Rpn2/Drep4/rdx/Rnf146/Uggt/Usp30/Der-2/ari-1/Prosalpha6/Herc4/Cul1/not/HUWE1/Rpn6/CG1317/Prosalpha3/Pabp2/shrb/Npl4/CG15445/Cdc27/CkIalpha/PAN2/Cul4/RpLP0-like/Pop2/CG4619/Ltn1/CG9951/inc/pic/Rai1/Kdm2/pix
GO:BP	iron ion homeostasis	GO:0055072	8/830	21/12175	4.12762e-05	0.00078518	0.000609915	IscU/Ho/Cisd2/mfrn/AGBE/Irp-1B/Fer1HCH/VhaAC39-1
GO:BP	proteolysis involved in cellular protein catabolic process	GO:0051603	45/830	357/12175	4.40883e-05	0.000825445	0.000641192	alpha-Man-Ib/Ate1/Usp7/Vps28/CG4238/Rpn7/TER94/ALiX/Lon/RYBP/Rpn3/Rpn1/sgg/CG9003/Stam/Ufl1/gcl/CG8188/slmb/Rpn2/rdx/Rnf146/Uggt/Usp30/Der-2/ari-1/Prosalpha6/Herc4/Cul1/not/HUWE1/Rpn6/CG1317/Prosalpha3/shrb/Npl4/CG15445/Cdc27/CkIalpha/Cul4/Ltn1/CG9951/inc/pic/Kdm2
GO:BP	neurotransmitter secretion	GO:0007269	19/830	101/12175	4.43717e-05	0.000825445	0.000641192	comt/Frq1/alphaSnap/Syt4/gammaSnap2/Arf51F/Ih/Arl8/Sec5/Csp/Vap33/Rop/Snap25/Syx5/Rab3-GAP/Mctp/Syngr/nSyb/Syt1
GO:BP	signal release from synapse	GO:0099643	19/830	101/12175	4.43717e-05	0.000825445	0.000641192	comt/Frq1/alphaSnap/Syt4/gammaSnap2/Arf51F/Ih/Arl8/Sec5/Csp/Vap33/Rop/Snap25/Syx5/Rab3-GAP/Mctp/Syngr/nSyb/Syt1
GO:BP	nucleotide phosphorylation	GO:0046939	10/830	33/12175	4.49229e-05	0.000829598	0.000644418	Gapdh1/Ald1/Pfk/Hex-A/Tpi/Eno/Pgk/PyK/Gapdh2/Pglym78
GO:BP	organelle transport along microtubule	GO:0072384	9/830	27/12175	4.66201e-05	0.000854702	0.000663919	Marf/Khc/nudE/dop/Miro/milt/Khc-73/BORCS5/Aplip1
GO:BP	synaptic vesicle endocytosis	GO:0048488	11/830	40/12175	5.12017e-05	0.000925288	0.000718749	shi/Arf51F/Dap160/Nlg4/stj/Eps-15/Synj/EndoA/Drp1/Vps35/Syt1
GO:BP	presynaptic endocytosis	GO:0140238	11/830	40/12175	5.12017e-05	0.000925288	0.000718749	shi/Arf51F/Dap160/Nlg4/stj/Eps-15/Synj/EndoA/Drp1/Vps35/Syt1
GO:BP	vesicle organization	GO:0016050	20/830	111/12175	5.36577e-05	0.000962794	0.000747883	comt/GABPI/Syt4/Vps28/Fmr1/CG6454/TER94/TSG101/Arl8/Sec5/PsGEF/dop/Snap25/Hs3st-B/Syx5/shrb/Drp1/ArfGAP3/nSyb/Syt1
GO:BP	cell junction assembly	GO:0034329	32/830	225/12175	5.7283e-05	0.00102	0.000792318	Atpalpha/Ten-m/futsch/Fmr1/Octbeta2R/Rheb/wun/stau/sgg/Med/Tbce/Tao/shakB/Nlg4/alpha-Spec/stj/Dad/Arp3/Eps-15/arm/Syn1/beta-Spec/Imp/Nrx-IV/Atg1/Cont/Mob2/LIMK1/Mad/Syp/vari/Lac
GO:BP	cellular protein catabolic process	GO:0044257	45/830	361/12175	5.78353e-05	0.00102	0.000792318	alpha-Man-Ib/Ate1/Usp7/Vps28/CG4238/Rpn7/TER94/ALiX/Lon/RYBP/Rpn3/Rpn1/sgg/CG9003/Stam/Ufl1/gcl/CG8188/slmb/Rpn2/rdx/Rnf146/Uggt/Usp30/Der-2/ari-1/Prosalpha6/Herc4/Cul1/not/HUWE1/Rpn6/CG1317/Prosalpha3/shrb/Npl4/CG15445/Cdc27/CkIalpha/Cul4/Ltn1/CG9951/inc/pic/Kdm2
GO:BP	cell part morphogenesis	GO:0032990	53/830	449/12175	5.80552e-05	0.00102	0.000792318	Marf/SelR/Ten-m/Gclc/futsch/Fmr1/Khc/RhoGAP93B/TER94/nudE/sif/Rheb/Dlic/Hsc70-5/dpr11/beat-Ic/Sac1/Med/robo3/Mitofilin/Tao/sff/alpha-Spec/AP-1sigma/mew/Dad/side/DIP-gamma/prel/beat-Ia/not/HUWE1/Miga/beta-Spec/bur/ct/AMPKalpha/shrb/Atg1/fry/Cont/LRP1/LIMK1/vvl/TrpRS/hts/spri/Nak/beat-VI/Fas1/Ptp4E/mmy/tutl
GO:BP	modification-dependent macromolecule catabolic process	GO:0043632	43/830	340/12175	6.0006e-05	0.001047	0.000813294	alpha-Man-Ib/Ate1/Usp7/Vps28/CG4238/Rpn7/TER94/ALiX/RYBP/Rpn3/Rpn1/sgg/CG9003/Stam/Ufl1/gcl/CG8188/slmb/Rpn2/rdx/Rnf146/Usp30/Der-2/ari-1/Prosalpha6/Herc4/Cul1/not/HUWE1/Rpn6/CG1317/Prosalpha3/shrb/Npl4/CG15445/Cdc27/CkIalpha/Cul4/Ltn1/CG9951/inc/pic/Kdm2
GO:BP	regulation of neurotransmitter levels	GO:0001505	20/830	112/12175	6.12254e-05	0.00106096	0.000824136	comt/Frq1/alphaSnap/Syt4/gammaSnap2/Arf51F/Ih/Arl8/Sec5/Csp/Vap33/Rop/Snap25/Syx5/inaE/Rab3-GAP/Mctp/Syngr/nSyb/Syt1
GO:BP	NAD metabolic process	GO:0019674	6/830	12/12175	6.37802e-05	0.00108922	0.000846092	Pfk/Eno/CG6145/Gpo1/Gdh/Gpdh1
GO:BP	phospholipid metabolic process	GO:0006644	25/830	158/12175	6.42737e-05	0.00108922	0.000846092	Pcyt1/elm/frj/CG2201/Ttc7/CG14411/wun/Sac1/Pect/PGAP1/Ack/CG3632/CG7149/Hmgs/Ipp/Vap33/CG3009/INPP5E/Synj/Idi/CG6805/CG7990/nes/Taz/PIG-Q
GO:BP	glycerolipid metabolic process	GO:0046486	25/830	158/12175	6.42737e-05	0.00108922	0.000846092	Pcyt1/frj/CG2201/Ttc7/CG14411/Dgkepsilon/CG8298/Sac1/Pect/PGAP1/CG3632/CG7149/Lkb1/Ipp/Gpdh1/Vap33/INPP5E/Synj/schlank/CG6805/CG7990/nes/Taz/Gk2/PIG-Q
GO:BP	axonal transport	GO:0098930	9/830	28/12175	6.45785e-05	0.00108922	0.000846092	Marf/Fmr1/Khc/Arl8/Miro/milt/BORCS5/Kap3/Aplip1
GO:BP	presynapse organization	GO:0099172	11/830	41/12175	6.57129e-05	0.00110102	0.000855253	Ten-m/ND-20/Fmr1/Nlg4/Arp3/Vap33/p38b/Smu1/Nrx-IV/Atg1/Aplip1
GO:BP	regulation of transport	GO:0051049	39/830	299/12175	6.69412e-05	0.00111422	0.000865507	Teh1/Fkbp59/Frq1/Hk/LpR2/Syt4/qvr/porin/CG6454/levy/CG6329/NKAIN/sgg/PGAP1/Ih/Tao/numb/Sec5/crq/rdx/stj/PsGEF/SrpRalpha/ArfGAP1/Snx3/BORCS5/Hrs/hob/Mctp/LRP1/CG7781/drpr/Stim/Vps35/eag/spri/Nak/Syt1/AdipoR
GO:BP	response to oxidative stress	GO:0006979	23/830	140/12175	6.90219e-05	0.00113482	0.00088151	ATPsynD/SdhC/Sod2/Chchd2/SelR/ND-20/Ho/sun/ND-B17.2/Trap1/Mnn1/Ucp4A/ND-SGDH/Egm/ND-B14/Trx-2/p38b/inaE/fbl/Atg1/NLaz/Cat/per
GO:BP	protein modification by small protein conjugation or removal	GO:0070647	40/830	310/12175	6.9076e-05	0.00113482	0.00088151	Mkrn1/Usp7/CG4238/CG9941/SCCRO/msl-2/CG7332/Ufl1/gcl/CG8188/slmb/rdx/CG2224/CG2218/Traf6/CG1812/CSN7/Usp30/CG17754/Bruce/ari-1/Herc4/Cul1/not/HUWE1/CG1317/bur/Bre1/alien/Cdc27/bchs/Asx/CG6325/elgi/Cul4/pic/CSN6/Kdm2/Rabex-5/CG10646
GO:BP	autophagy	GO:0006914	29/830	198/12175	7.38821e-05	0.00119822	0.000930755	shi/comt/Sod2/Vps28/TER94/Atg3/Rheb/Hsc70-5/CG3632/Vps4/Acn/Arl8/zda/SREBP/EMC6/stj/Traf6/Bruce/CG8155/CG5676/Synj/AMPKalpha/shrb/GlyS/Atg1/CycC/bchs/Rab3-GAP/EndoA
GO:BP	process utilizing autophagic mechanism	GO:0061919	29/830	198/12175	7.38821e-05	0.00119822	0.000930755	shi/comt/Sod2/Vps28/TER94/Atg3/Rheb/Hsc70-5/CG3632/Vps4/Acn/Arl8/zda/SREBP/EMC6/stj/Traf6/Bruce/CG8155/CG5676/Synj/AMPKalpha/shrb/GlyS/Atg1/CycC/bchs/Rab3-GAP/EndoA
GO:BP	positive regulation of transport	GO:0051050	24/830	150/12175	7.46676e-05	0.0012022	0.000933851	Hk/LpR2/Syt4/qvr/CG6454/levy/CG6329/PGAP1/Tao/numb/Sec5/stj/Snx3/BORCS5/Hrs/hob/CG7781/drpr/Stim/Vps35/eag/spri/Syt1/AdipoR
GO:BP	synapse assembly	GO:0007416	26/830	169/12175	7.50782e-05	0.0012022	0.000933851	Atpalpha/Ten-m/futsch/Fmr1/Octbeta2R/Rheb/stau/sgg/Med/Tbce/Tao/Nlg4/alpha-Spec/stj/Dad/Arp3/Eps-15/Syn1/beta-Spec/Imp/Nrx-IV/Atg1/Mob2/LIMK1/Mad/Syp
GO:BP	terminal button organization	GO:0072553	10/830	35/12175	7.86402e-05	0.001247	0.000968653	Ten-m/ND-20/Fmr1/Arp3/Vap33/p38b/Smu1/Nrx-IV/Atg1/Aplip1
GO:BP	regulation of intracellular signal transduction	GO:1902531	43/830	344/12175	7.8862e-05	0.001247	0.000968653	P32/ATPsynD/lncRNA:Hsromega/Usp7/Mnn1/ALiX/RtGEF/Rheb/CG18659/CG34393/Sac1/sgg/Ack/flw/Tao/slmb/Lkb1/alpha-Spec/rdx/PsGEF/hppy/Traf6/Herc4/Ccm3/ArfGAP1/Cul1/spoon/p38b/HUWE1/Sik2/AMPKalpha/Efa6/Atg1/sra/CkIalpha/cpa/elgi/CG34408/spri/Aplip1/LRR/CG9098/Rabex-5
GO:BP	regulated exocytosis	GO:0045055	14/830	64/12175	8.14336e-05	0.00127967	0.000994027	comt/alphaSnap/Syt4/gammaSnap2/Sec5/PsGEF/Csp/Vap33/Rop/Snap25/Syx5/Syngr/nSyb/Syt1
GO:BP	positive regulation of transmembrane transport	GO:0034764	9/830	29/12175	8.8021e-05	0.00137465	0.0010678	Hk/qvr/CG6454/levy/CG6329/stj/CG7781/Stim/eag
GO:BP	synaptic vesicle exocytosis	GO:0016079	13/830	57/12175	9.22931e-05	0.00143252	0.00111276	comt/alphaSnap/Syt4/gammaSnap2/Sec5/Csp/Vap33/Rop/Snap25/Syx5/Syngr/nSyb/Syt1
GO:BP	axonogenesis	GO:0007409	41/830	325/12175	9.37159e-05	0.00144574	0.00112303	SelR/Ten-m/Gclc/futsch/Fmr1/Khc/RhoGAP93B/nudE/sif/Rheb/Dlic/dpr11/beat-Ic/Sac1/Med/robo3/sff/alpha-Spec/AP-1sigma/mew/Dad/side/DIP-gamma/beat-Ia/not/HUWE1/beta-Spec/bur/AMPKalpha/Atg1/Cont/LRP1/LIMK1/vvl/hts/spri/beat-VI/Fas1/Ptp4E/mmy/tutl
GO:BP	cellular carbohydrate metabolic process	GO:0044262	18/830	98/12175	9.67438e-05	0.0014753	0.00114599	Tpi/CG7766/Atg3/CG8298/sgg/Actbeta/AGBE/Ipp/Gbs-76A/Synj/UGP/GlyS/Atg1/sotv/CG6805/Pgm1/Gk2/CG6218
GO:BP	localization within membrane	GO:0051668	29/830	201/12175	9.71408e-05	0.0014753	0.00114599	shi/comt/Trp1/GABPI/CG6454/app/Ttc7/CG18659/Sec5/CG9393/Tom7/dop/SrpRalpha/arm/Herc4/nmd/IKKepsilon/OXA1L/Lam/CG4908/Tom70/Snx3/Hrs/CG4942/X11Lbeta/Pex19/Vps35/fidipidine/cin
GO:BP	carbohydrate catabolic process	GO:0016052	14/830	65/12175	9.73814e-05	0.0014753	0.00114599	Gapdh1/Ald1/Pfk/Hex-A/Tpi/Eno/Pgk/PyK/Gapdh2/Pglym78/Atg3/Actbeta/GlyS/Atg1
GO:BP	actin filament polymerization	GO:0030041	15/830	73/12175	9.80724e-05	0.00147692	0.00114725	Arpc3A/shi/SelR/Vrp1/ALiX/PsGEF/Arp3/Btk29A/spoon/p38b/Lam/tmod/cpa/gek/LRR
GO:BP	glucose metabolic process	GO:0006006	12/830	50/12175	0.000101112	0.00151368	0.00117581	Gapdh1/Pfk/Tpi/Eno/Pgk/Gapdh2/Actbeta/Gbs-76A/GlyS/CG6650/Atg1/PCB
GO:BP	organelle fusion	GO:0048284	16/830	82/12175	0.000111239	0.00165154	0.00128289	comt/Marf/Syt4/CG6454/Chchd3/TER94/Arl8/Sec5/rho-7/PsGEF/Miga/Snap25/Syx5/CG3862/nSyb/Syt1
GO:BP	anterograde axonal transport	GO:0008089	6/830	13/12175	0.000111626	0.00165154	0.00128289	Fmr1/Khc/Arl8/BORCS5/Kap3/Aplip1
GO:BP	organelle localization	GO:0051640	31/830	223/12175	0.000114536	0.00168475	0.00130869	shi/comt/Marf/Fmr1/Khc/east/deltaCOP/Msp300/nudE/flw/Arl8/Sec5/dop/Miro/milt/Vap33/Rilpl/Lam/Rop/Snap25/Syx5/Khc-73/BORCS5/ens/CG11123/Drp1/Syngr/ArfGAP3/Aplip1/nSyb/pix
GO:BP	regulation of cellular catabolic process	GO:0031329	34/830	255/12175	0.000125679	0.00183796	0.0014277	shi/Sod2/bsf/Fmr1/TER94/Rheb/sgg/Actbeta/CG3632/Smg6/bol/Acn/Ufl1/slmb/Lkb1/SREBP/Rnf146/Traf6/Bruce/ari-1/CG8155/Cul1/Synj/AMPKalpha/Pabp2/CG15445/GlyS/Atg1/CycC/CkIalpha/PAN2/Pop2/CG4619/CG9951
GO:BP	neuron projection development	GO:0031175	54/830	474/12175	0.000127276	0.00185063	0.00143754	Hasp/SelR/Ten-m/Gclc/futsch/Fmr1/Khc/RhoGAP93B/TER94/nudE/sif/Rheb/Dlic/dpr11/beat-Ic/Sac1/Med/robo3/Tao/sff/alpha-Spec/AP-1sigma/mew/Dad/side/Arp3/DIP-gamma/prel/beat-Ia/not/HUWE1/Rop/beta-Spec/Imp/bur/ct/AMPKalpha/shrb/Atg1/fry/Cont/bchs/LRP1/LIMK1/vvl/TrpRS/hts/spri/Nak/beat-VI/Fas1/Ptp4E/mmy/tutl
GO:BP	protein catabolic process	GO:0030163	45/830	374/12175	0.000133907	0.00193591	0.00150378	alpha-Man-Ib/Ate1/Usp7/Vps28/CG4238/Rpn7/TER94/ALiX/Lon/RYBP/Rpn3/Rpn1/sgg/CG9003/Stam/Ufl1/gcl/CG8188/slmb/Rpn2/rdx/Rnf146/Uggt/Usp30/Der-2/ari-1/Prosalpha6/Herc4/Cul1/not/HUWE1/Rpn6/CG1317/Prosalpha3/shrb/Npl4/CG15445/Cdc27/CkIalpha/Cul4/Ltn1/CG9951/inc/pic/Kdm2
GO:BP	negative regulation of response to stimulus	GO:0048585	47/830	397/12175	0.00014099	0.00202674	0.00157434	ATPsynD/Usp7/Fmr1/Dap160/Mnn1/TER94/PPP4R2r/SP2353/Rheb/wun/RYBP/Sac1/sgg/Egm/Ack/flw/gcl/Tao/numb/slmb/rdx/hppy/Dad/Traf6/Csp/Herc4/CG14182/Cul1/pigs/Xxylt/p38b/HUWE1/Lam/Sik2/Synj/AMPKalpha/Npl4/Hrs/Atg1/CkIalpha/cpa/Cul4/LRR/pic/kek5/Ptp4E/Cow
GO:BP	regulation of growth	GO:0040008	38/830	299/12175	0.000143486	0.00205096	0.00159315	shi/futsch/Fmr1/Wbp2/SCCRO/Octbeta2R/TSG101/RtGEF/Rheb/Lk6/stau/sgg/Med/Actbeta/Tbce/Tao/Lkb1/alpha-Spec/stj/hppy/Dad/Arp3/Hs6st/Eps-15/Syn1/p38b/beta-Spec/AMPKalpha/Atg1/CG9328/Mob2/bchs/Hph/Mad/drpr/Syp/Rabex-5/pix
GO:BP	positive regulation of cation channel activity	GO:2001259	7/830	19/12175	0.000162603	0.00230857	0.00179326	Hk/qvr/CG6329/stj/CG7781/Stim/eag
GO:BP	polysaccharide metabolic process	GO:0005976	11/830	45/12175	0.000164246	0.00230857	0.00179326	CG7766/Atg3/sgg/Actbeta/AGBE/Gbs-76A/UGP/GlyS/Atg1/sotv/Pgm1
GO:BP	cellular polysaccharide metabolic process	GO:0044264	11/830	45/12175	0.000164246	0.00230857	0.00179326	CG7766/Atg3/sgg/Actbeta/AGBE/Gbs-76A/UGP/GlyS/Atg1/sotv/Pgm1
GO:BP	regulation of synaptic assembly at neuromuscular junction	GO:0008582	19/830	111/12175	0.00016623	0.00232355	0.0018049	futsch/Fmr1/Octbeta2R/Rheb/stau/sgg/Med/Tbce/Tao/alpha-Spec/stj/Dad/Arp3/Eps-15/Syn1/beta-Spec/Mob2/Mad/Syp
GO:BP	neuron remodeling	GO:0016322	12/830	53/12175	0.000183887	0.00251779	0.00195578	Vps28/Fmr1/hdc/TSG101/Vps4/Stam/slmb/Cul1/Imp/shrb/Hrs/drpr
GO:BP	cellular protein complex disassembly	GO:0043624	12/830	53/12175	0.000183887	0.00251779	0.00195578	comt/alphaSnap/futsch/CG6094/aux/alpha-Spec/mRF1/tmod/beta-Spec/cpa/LRR/pix
GO:BP	mitochondrial electron transport, cytochrome c to oxygen	GO:0006123	6/830	14/12175	0.000184107	0.00251779	0.00195578	COX4/COX5A/COX5B/levy/Cyt-c-p/COX7C
GO:BP	cellular iron ion homeostasis	GO:0006879	6/830	14/12175	0.000184107	0.00251779	0.00195578	IscU/Cisd2/AGBE/Irp-1B/Fer1HCH/VhaAC39-1
GO:BP	synaptic vesicle recycling	GO:0036465	11/830	46/12175	0.000202752	0.00275786	0.00214226	shi/Arf51F/Dap160/Nlg4/stj/Eps-15/Synj/EndoA/Drp1/Vps35/Syt1
GO:BP	establishment of organelle localization	GO:0051656	24/830	160/12175	0.000208382	0.00276694	0.00214931	shi/Marf/Fmr1/Khc/east/Msp300/nudE/flw/Sec5/dop/Miro/milt/Lam/Rop/Snap25/Khc-73/BORCS5/ens/CG11123/Drp1/Syngr/ArfGAP3/Aplip1/pix
GO:BP	endosomal transport	GO:0016197	19/830	113/12175	0.000211525	0.00276694	0.00214931	shi/Vps28/Dap160/CG18659/Vps4/Stam/Sec5/Eps-15/Reps/IKKepsilon/Synj/Vps29/Snx3/shrb/Hrs/EndoA/Sara/Vps35/Syt1
GO:BP	glycogen metabolic process	GO:0005977	10/830	39/12175	0.000212263	0.00276694	0.00214931	CG7766/Atg3/sgg/Actbeta/AGBE/Gbs-76A/UGP/GlyS/Atg1/Pgm1
GO:BP	cellular glucan metabolic process	GO:0006073	10/830	39/12175	0.000212263	0.00276694	0.00214931	CG7766/Atg3/sgg/Actbeta/AGBE/Gbs-76A/UGP/GlyS/Atg1/Pgm1
GO:BP	energy reserve metabolic process	GO:0006112	10/830	39/12175	0.000212263	0.00276694	0.00214931	CG7766/Atg3/sgg/Actbeta/AGBE/Gbs-76A/UGP/GlyS/Atg1/Pgm1
GO:BP	glucan metabolic process	GO:0044042	10/830	39/12175	0.000212263	0.00276694	0.00214931	CG7766/Atg3/sgg/Actbeta/AGBE/Gbs-76A/UGP/GlyS/Atg1/Pgm1
GO:BP	positive regulation of catabolic process	GO:0009896	25/830	170/12175	0.000212824	0.00276694	0.00214931	shi/CG4238/TER94/Lon/sgg/Actbeta/slmb/rdx/Rnf146/Traf6/ari-1/Cul1/HUWE1/Synj/AMPKalpha/Pabp2/GlyS/Atg1/CycC/CkIalpha/PAN2/Cul4/Pop2/CG9951/pic
GO:BP	modulation of chemical synaptic transmission	GO:0050804	22/830	141/12175	0.000213262	0.00276694	0.00214931	shi/comt/Frq1/Sod2/Syt4/qvr/Fmr1/CG6329/Nmnat/Ih/Nlg4/alpha-Spec/Csp/Snap25/beta-Spec/Atg1/Rab3-GAP/Mctp/CG7781/Cat/Syp/Syt1
GO:BP	regulation of trans-synaptic signaling	GO:0099177	22/830	141/12175	0.000213262	0.00276694	0.00214931	shi/comt/Frq1/Sod2/Syt4/qvr/Fmr1/CG6329/Nmnat/Ih/Nlg4/alpha-Spec/Csp/Snap25/beta-Spec/Atg1/Rab3-GAP/Mctp/CG7781/Cat/Syp/Syt1
GO:BP	positive regulation of transporter activity	GO:0032411	8/830	26/12175	0.000233383	0.00299725	0.00232822	Hk/qvr/levy/CG6329/stj/CG7781/Stim/eag
GO:BP	positive regulation of ion transmembrane transporter activity	GO:0032414	8/830	26/12175	0.000233383	0.00299725	0.00232822	Hk/qvr/levy/CG6329/stj/CG7781/Stim/eag
GO:BP	cellular homeostasis	GO:0019725	30/830	223/12175	0.000263484	0.00336674	0.00261523	IscU/mbl/Atpalpha/comt/nrv3/Hex-A/Cisd2/Pgk/CG7430/TER94/CG1090/CG42542/SP2353/Vha68-1/AGBE/Irp-1B/SPoCk/Trx-2/PMCA/Nckx30C/Fer1HCH/Csp/Miro/Mid1/Scox/Vha55/Syx5/Trxr-1/Stim/VhaAC39-1
GO:BP	protein targeting to mitochondrion	GO:0006626	12/830	55/12175	0.000266603	0.00337253	0.00261973	Hsp60A/UQCR-C1/Hsc70-5/CG7382/CG9393/Tom7/Roe1/Tom40/CG7791/Tom70/CG8531/AIF
GO:BP	neuron maturation	GO:0042551	12/830	55/12175	0.000266603	0.00337253	0.00261973	Vps28/Fmr1/hdc/TSG101/Vps4/Stam/slmb/Cul1/Imp/shrb/Hrs/drpr
GO:BP	supramolecular fiber organization	GO:0097435	35/830	276/12175	0.000270564	0.00340561	0.00264542	Arpc3A/shi/SelR/Ten-m/futsch/Vrp1/Khc/ALiX/Msp300/nudE/Sac1/Ack/Tbce/alpha-Spec/mew/PsGEF/Arp3/Ggamma1/Btk29A/IKKepsilon/spoon/pigs/Vap33/p38b/Lam/tmod/beta-Spec/ens/Hip1/Efa6/cpa/gek/hts/LRR/Grip163
GO:BP	axonal transport of mitochondrion	GO:0019896	5/830	10/12175	0.000274614	0.00343947	0.00267173	Marf/Khc/Miro/milt/Aplip1
GO:BP	metal ion homeostasis	GO:0055065	21/830	134/12175	0.000276778	0.0034495	0.00267952	IscU/CG14757/Atpalpha/nrv3/Ho/Cisd2/mfrn/Nmdar1/CG1090/CG42542/AGBE/Irp-1B/SPoCk/PMCA/Nckx30C/Fer1HCH/Mid1/Scox/Syx5/Stim/VhaAC39-1
GO:BP	synaptic vesicle priming	GO:0016082	6/830	15/12175	0.000289216	0.00357674	0.00277836	comt/alphaSnap/gammaSnap2/Vap33/Rop/Snap25
GO:BP	glycoprotein metabolic process	GO:0009100	22/830	144/12175	0.000289815	0.00357674	0.00277836	alpha-Man-Ib/FucTA/GCS1/FucT6/GlcAT-S/Mgat2/Alg11/CG9395/sff/GCS2alpha/Uggt/CG6659/Hs6st/Xxylt/Pabp2/CG3149/sotv/CG31690/alpha-Man-IIa/Ostgamma/mmy/GalT1
GO:BP	regulation of cellular component biogenesis	GO:0044087	37/830	299/12175	0.000298661	0.00366802	0.00284926	Arpc3A/shi/futsch/Fmr1/Vrp1/Octbeta2R/sif/Rheb/stau/sgg/Med/Tbce/Tao/slmb/alpha-Spec/tws/stj/PsGEF/Dad/Arp3/Eps-15/Btk29A/Cul1/spoon/Syn1/p38b/Lam/tmod/beta-Spec/Synj/Efa6/cpa/Mob2/gek/Mad/Syp/LRR
GO:BP	actin polymerization or depolymerization	GO:0008154	15/830	81/12175	0.00032957	0.00402808	0.00312895	Arpc3A/shi/SelR/Vrp1/ALiX/PsGEF/Arp3/Btk29A/spoon/p38b/Lam/tmod/cpa/gek/LRR
GO:BP	proteasome-mediated ubiquitin-dependent protein catabolic process	GO:0043161	32/830	247/12175	0.000332817	0.00404201	0.00313977	alpha-Man-Ib/Ate1/CG4238/Rpn7/TER94/RYBP/Rpn3/Rpn1/sgg/CG9003/Ufl1/gcl/CG8188/slmb/Rpn2/rdx/Rnf146/Der-2/ari-1/Prosalpha6/Cul1/HUWE1/Rpn6/CG1317/Prosalpha3/Cdc27/CkIalpha/Cul4/Ltn1/inc/pic/Kdm2
GO:BP	ion homeostasis	GO:0050801	24/830	165/12175	0.000333905	0.00404201	0.00313977	IscU/CG14757/Atpalpha/nrv3/Ho/Cisd2/mfrn/Nmdar1/CG1090/CG42542/Vha68-1/AGBE/shakB/Irp-1B/SPoCk/PMCA/Nckx30C/Fer1HCH/Mid1/Scox/Vha55/Syx5/Stim/VhaAC39-1
GO:BP	protein N-linked glycosylation	GO:0006487	9/830	34/12175	0.000338569	0.00407895	0.00316846	GCS1/FucT6/Mgat2/Alg11/sff/Uggt/CG3149/Ostgamma/GalT1
GO:BP	macroautophagy	GO:0016236	17/830	99/12175	0.000347025	0.00416102	0.00323221	Vps28/TER94/Atg3/Rheb/Vps4/Arl8/EMC6/stj/Bruce/CG8155/Synj/AMPKalpha/GlyS/Atg1/bchs/Rab3-GAP/EndoA
GO:BP	negative regulation of signal transduction	GO:0009968	41/830	346/12175	0.000362487	0.0043259	0.00336029	ATPsynD/Usp7/Fmr1/Dap160/Mnn1/TER94/PPP4R2r/Rheb/Sac1/sgg/Ack/flw/gcl/Tao/numb/slmb/rdx/hppy/Dad/Traf6/Herc4/CG14182/Cul1/pigs/Xxylt/p38b/HUWE1/Sik2/Synj/AMPKalpha/Npl4/Hrs/Atg1/CkIalpha/cpa/Cul4/LRR/pic/kek5/Ptp4E/Cow
GO:BP	programmed cell death	GO:0012501	38/830	313/12175	0.000365083	0.00433643	0.00336847	mbl/shi/Coa8/lncRNA:Hsromega/Hsp60A/futsch/Fmr1/porin/CG4238/hdc/TER94/Idh3b/wun/RYBP/E2f1/Ack/Tao/slmb/crq/Drep4/Lkb1/rdx/hppy/Mdh2/Bruce/Miro/arm/Cul1/HtrA2/Atg1/Dp/CG9231/drpr/Msh6/AIF/Aatf/msk/pix
GO:BP	hexose metabolic process	GO:0019318	13/830	65/12175	0.000372955	0.00438873	0.00340909	Gapdh1/Pfk/Tpi/Eno/Pgk/Gapdh2/Actbeta/Gbs-76A/GlyS/CG6650/Atg1/PCB/alpha-Man-IIa
GO:BP	regulation of JNK cascade	GO:0046328	13/830	65/12175	0.000372955	0.00438873	0.00340909	lncRNA:Hsromega/Mnn1/ALiX/Sac1/sgg/flw/Lkb1/rdx/hppy/Traf6/HUWE1/cpa/Aplip1
GO:BP	regulation of synapse assembly	GO:0051963	19/830	118/12175	0.000374889	0.00439106	0.0034109	futsch/Fmr1/Octbeta2R/Rheb/stau/sgg/Med/Tbce/Tao/alpha-Spec/stj/Dad/Arp3/Eps-15/Syn1/beta-Spec/Mob2/Mad/Syp
GO:BP	protein ubiquitination	GO:0016567	29/830	218/12175	0.000400671	0.00467142	0.00362868	Mkrn1/CG4238/CG9941/SCCRO/msl-2/gcl/CG8188/slmb/rdx/CG2218/Traf6/CG1812/CG17754/Bruce/ari-1/Herc4/Cul1/HUWE1/CG1317/Bre1/Cdc27/bchs/CG6325/elgi/Cul4/pic/Kdm2/Rabex-5/CG10646
GO:BP	positive regulation of ion transmembrane transport	GO:0034767	8/830	28/12175	0.000410996	0.00476982	0.00370512	Hk/qvr/levy/CG6329/stj/CG7781/Stim/eag
GO:BP	neuron projection morphogenesis	GO:0048812	49/830	439/12175	0.000417563	0.00481035	0.0037366	SelR/Ten-m/Gclc/futsch/Fmr1/Khc/RhoGAP93B/TER94/nudE/sif/Rheb/Dlic/dpr11/beat-Ic/Sac1/Med/robo3/Tao/sff/alpha-Spec/AP-1sigma/mew/Dad/side/DIP-gamma/prel/beat-Ia/not/HUWE1/beta-Spec/bur/ct/AMPKalpha/shrb/Atg1/fry/Cont/LRP1/LIMK1/vvl/TrpRS/hts/spri/Nak/beat-VI/Fas1/Ptp4E/mmy/tutl
GO:BP	glycerophospholipid metabolic process	GO:0006650	19/830	119/12175	0.000418291	0.00481035	0.0037366	Pcyt1/frj/CG2201/Ttc7/CG14411/Sac1/Pect/PGAP1/CG3632/CG7149/Ipp/Vap33/INPP5E/Synj/CG6805/CG7990/nes/Taz/PIG-Q
GO:BP	positive regulation of cellular component organization	GO:0051130	34/830	272/12175	0.000430061	0.00492332	0.00382436	Arpc3A/shi/Marf/Syt4/CG6454/Vrp1/Octbeta2R/nudE/sif/Rheb/stau/sgg/Med/Tao/numb/Sec5/slmb/PsGEF/Arp3/Cul1/p38b/Lam/Rop/Imp/Synj/Cdc27/cpa/CG9231/Mad/Drp1/drpr/spri/LRR/Syt1
GO:BP	phosphatidylinositol dephosphorylation	GO:0046856	6/830	16/12175	0.000436197	0.00497107	0.00386145	CG14411/Sac1/CG3632/INPP5E/Synj/CG6805
GO:BP	transition metal ion homeostasis	GO:0055076	11/830	50/12175	0.000441973	0.00497879	0.00386744	IscU/CG14757/Ho/Cisd2/mfrn/AGBE/Irp-1B/Fer1HCH/Scox/Syx5/VhaAC39-1
GO:BP	neurotransmitter transport	GO:0006836	20/830	129/12175	0.000442777	0.00497879	0.00386744	comt/Frq1/alphaSnap/Syt4/gammaSnap2/Arf51F/CG43066/Ih/Arl8/Sec5/Csp/Vap33/Rop/Snap25/Syx5/Rab3-GAP/Mctp/Syngr/nSyb/Syt1
GO:BP	positive regulation of organelle organization	GO:0010638	20/830	129/12175	0.000442777	0.00497879	0.00386744	Arpc3A/shi/Marf/Syt4/CG6454/Vrp1/stau/sgg/Sec5/slmb/Arp3/Cul1/p38b/Lam/Synj/Cdc27/CG9231/Drp1/LRR/Syt1
GO:BP	cell projection morphogenesis	GO:0048858	49/830	441/12175	0.000463385	0.0051646	0.00401178	SelR/Ten-m/Gclc/futsch/Fmr1/Khc/RhoGAP93B/TER94/nudE/sif/Rheb/Dlic/dpr11/beat-Ic/Sac1/Med/robo3/Tao/sff/alpha-Spec/AP-1sigma/mew/Dad/side/DIP-gamma/prel/beat-Ia/not/HUWE1/beta-Spec/bur/ct/AMPKalpha/shrb/Atg1/fry/Cont/LRP1/LIMK1/vvl/TrpRS/hts/spri/Nak/beat-VI/Fas1/Ptp4E/mmy/tutl
GO:BP	plasma membrane bounded cell projection morphogenesis	GO:0120039	49/830	441/12175	0.000463385	0.0051646	0.00401178	SelR/Ten-m/Gclc/futsch/Fmr1/Khc/RhoGAP93B/TER94/nudE/sif/Rheb/Dlic/dpr11/beat-Ic/Sac1/Med/robo3/Tao/sff/alpha-Spec/AP-1sigma/mew/Dad/side/DIP-gamma/prel/beat-Ia/not/HUWE1/beta-Spec/bur/ct/AMPKalpha/shrb/Atg1/fry/Cont/LRP1/LIMK1/vvl/TrpRS/hts/spri/Nak/beat-VI/Fas1/Ptp4E/mmy/tutl
GO:BP	lipid modification	GO:0030258	14/830	75/12175	0.000474021	0.00525066	0.00407862	frj/CG14411/wun/Dgkepsilon/Sac1/Egm/CG3632/INPP5E/Synj/CG6805/nes/Mtpbeta/AdipoR/CG8778
GO:BP	regulation of apoptotic process involved in development	GO:1904748	5/830	11/12175	0.000475257	0.00525066	0.00407862	E2f1/slmb/Bruce/Atg1/Dp
GO:BP	proteasomal protein catabolic process	GO:0010498	33/830	263/12175	0.000485133	0.00533646	0.00414528	alpha-Man-Ib/Ate1/CG4238/Rpn7/TER94/RYBP/Rpn3/Rpn1/sgg/CG9003/Ufl1/gcl/CG8188/slmb/Rpn2/rdx/Rnf146/Uggt/Der-2/ari-1/Prosalpha6/Cul1/HUWE1/Rpn6/CG1317/Prosalpha3/Cdc27/CkIalpha/Cul4/Ltn1/inc/pic/Kdm2
GO:BP	cellular metal ion homeostasis	GO:0006875	17/830	102/12175	0.000497744	0.00544477	0.00422941	IscU/Atpalpha/nrv3/Cisd2/CG1090/CG42542/AGBE/Irp-1B/SPoCk/PMCA/Nckx30C/Fer1HCH/Mid1/Scox/Syx5/Stim/VhaAC39-1
GO:BP	regulation of transmembrane transport	GO:0034762	10/830	43/12175	0.000499283	0.00544477	0.00422941	Hk/qvr/porin/CG6454/levy/CG6329/stj/CG7781/Stim/eag
GO:BP	inorganic ion homeostasis	GO:0098771	23/830	160/12175	0.000522379	0.00567218	0.00440606	IscU/CG14757/Atpalpha/nrv3/Ho/Cisd2/mfrn/Nmdar1/CG1090/CG42542/Vha68-1/AGBE/Irp-1B/SPoCk/PMCA/Nckx30C/Fer1HCH/Mid1/Scox/Vha55/Syx5/Stim/VhaAC39-1
GO:BP	organelle membrane fusion	GO:0090174	12/830	59/12175	0.000528943	0.00569213	0.00442155	comt/Syt4/CG6454/TER94/Arl8/Sec5/PsGEF/Snap25/Syx5/CG3862/nSyb/Syt1
GO:BP	regulation of metal ion transport	GO:0010959	11/830	51/12175	0.000529378	0.00569213	0.00442155	Teh1/Fkbp59/Hk/qvr/porin/CG6329/NKAIN/stj/CG7781/Stim/eag
GO:BP	glutamine family amino acid metabolic process	GO:0009064	8/830	29/12175	0.000534035	0.00569213	0.00442155	slgA/CG9674/P5CDh1/Gabat/P5cr/Gdh/GLS/Gad1
GO:BP	cellular transition metal ion homeostasis	GO:0046916	8/830	29/12175	0.000534035	0.00569213	0.00442155	IscU/Cisd2/AGBE/Irp-1B/Fer1HCH/Scox/Syx5/VhaAC39-1
GO:BP	respiratory system development	GO:0060541	31/830	243/12175	0.000535465	0.00569213	0.00442155	Atpalpha/shi/Vha26/hdc/deltaCOP/TSG101/Rheb/Dlic/wun/Sac1/Stam/Sec5/Hr78/mew/Hs6st/arm/Ccm3/Btk29A/IKKepsilon/Lam/ct/Nrx-IV/Hrs/Hph/sano/noc/VhaAC39-1/vari/Lac/Ptp4E/mmy
GO:BP	positive regulation of protein catabolic process	GO:0045732	14/830	76/12175	0.000545346	0.00577291	0.0044843	CG4238/TER94/Lon/sgg/slmb/rdx/Rnf146/ari-1/Cul1/HUWE1/CkIalpha/Cul4/CG9951/pic
GO:BP	stress-activated MAPK cascade	GO:0051403	15/830	85/12175	0.000564104	0.00594659	0.00461922	lncRNA:Hsromega/Mnn1/ALiX/Sac1/sgg/flw/Lkb1/rdx/hppy/Traf6/Btk29A/p38b/HUWE1/cpa/Aplip1
GO:BP	cation homeostasis	GO:0055080	23/830	161/12175	0.000571197	0.00599638	0.00465789	IscU/CG14757/Atpalpha/nrv3/Ho/Cisd2/mfrn/Nmdar1/CG1090/CG42542/Vha68-1/AGBE/Irp-1B/SPoCk/PMCA/Nckx30C/Fer1HCH/Mid1/Scox/Vha55/Syx5/Stim/VhaAC39-1
GO:BP	cell morphogenesis involved in neuron differentiation	GO:0048667	48/830	434/12175	0.0005852	0.00611185	0.00474759	SelR/Ten-m/Gclc/futsch/Fmr1/Khc/RhoGAP93B/TER94/nudE/sif/Rheb/Dlic/dpr11/beat-Ic/Sac1/Med/robo3/sff/alpha-Spec/AP-1sigma/mew/Dad/side/DIP-gamma/prel/beat-Ia/not/HUWE1/beta-Spec/bur/ct/AMPKalpha/shrb/Atg1/fry/Cont/LRP1/LIMK1/vvl/TrpRS/hts/spri/Nak/beat-VI/Fas1/Ptp4E/mmy/tutl
GO:BP	regulation of actin filament polymerization	GO:0030833	13/830	68/12175	0.000589444	0.00611185	0.00474759	Arpc3A/shi/Vrp1/PsGEF/Arp3/Btk29A/spoon/p38b/Lam/tmod/cpa/gek/LRR
GO:BP	regulation of stress-activated MAPK cascade	GO:0032872	13/830	68/12175	0.000589444	0.00611185	0.00474759	lncRNA:Hsromega/Mnn1/ALiX/Sac1/sgg/flw/Lkb1/rdx/hppy/Traf6/HUWE1/cpa/Aplip1
GO:BP	cell death	GO:0008219	43/830	377/12175	0.000592866	0.00612225	0.00475566	mbl/shi/Coa8/lncRNA:Hsromega/Hsp60A/futsch/Fmr1/porin/CG4238/hdc/TER94/Idh3b/Rheb/wun/RYBP/aux/E2f1/Ack/Tao/slmb/crq/Drep4/Lkb1/rdx/hppy/Traf6/Mdh2/Bruce/Miro/arm/IKKepsilon/Cul1/HtrA2/HUWE1/Atg1/Dp/CG9231/drpr/Msh6/AIF/Aatf/msk/pix
GO:BP	open tracheal system development	GO:0007424	30/830	234/12175	0.000601959	0.00619088	0.00480897	Atpalpha/shi/Vha26/hdc/deltaCOP/TSG101/Rheb/Dlic/wun/Sac1/Stam/Sec5/Hr78/mew/Hs6st/arm/Btk29A/IKKepsilon/Lam/ct/Nrx-IV/Hrs/Hph/sano/noc/VhaAC39-1/vari/Lac/Ptp4E/mmy
GO:BP	endomembrane system organization	GO:0010256	25/830	182/12175	0.000610152	0.00624973	0.00485469	EndoB/shi/comt/Marf/Ten-m/Vps28/TER94/TSG101/Msp300/scramb1/alpha-Spec/hppy/dop/Arp3/ari-1/CG5510/Ccm3/Vap33/Lam/Snap25/Hs3st-B/beta-Spec/EndoA/nes/Zw10
GO:BP	protein localization to membrane	GO:0072657	24/830	172/12175	0.000619379	0.00631867	0.00490824	shi/comt/Trp1/GABPI/CG6454/app/Ttc7/Sec5/CG9393/Tom7/dop/SrpRalpha/arm/Herc4/nmd/OXA1L/Lam/CG4908/Tom70/CG4942/X11Lbeta/Pex19/Vps35/cin
GO:BP	mitochondrion localization	GO:0051646	7/830	23/12175	0.00062193	0.00631921	0.00490866	Marf/Khc/Msp300/Miro/milt/Drp1/Aplip1
GO:BP	regulation of protein polymerization	GO:0032271	14/830	77/12175	0.000625586	0.00633093	0.00491776	Arpc3A/shi/Vrp1/PsGEF/Arp3/Btk29A/spoon/p38b/Lam/tmod/Efa6/cpa/gek/LRR
GO:BP	regulation of cell junction assembly	GO:1901888	19/830	123/12175	0.000638428	0.00643515	0.00499872	futsch/Fmr1/Octbeta2R/Rheb/stau/sgg/Med/Tbce/Tao/alpha-Spec/stj/Dad/Arp3/Eps-15/Syn1/beta-Spec/Mob2/Mad/Syp
GO:BP	stress-activated protein kinase signaling cascade	GO:0031098	15/830	86/12175	0.000641156	0.006437	0.00500016	lncRNA:Hsromega/Mnn1/ALiX/Sac1/sgg/flw/Lkb1/rdx/hppy/Traf6/Btk29A/p38b/HUWE1/cpa/Aplip1
GO:BP	tRNA aminoacylation for protein translation	GO:0006418	9/830	37/12175	0.000667652	0.00667652	0.00518621	AspRS-m/ValRS-m/PheRS-m/ThrRS/MetRS-m/TrpRS-m/TrpRS/LeuRS/AlaRS
GO:BP	regulation of stress-activated protein kinase signaling cascade	GO:0070302	13/830	69/12175	0.000681857	0.00679172	0.0052757	lncRNA:Hsromega/Mnn1/ALiX/Sac1/sgg/flw/Lkb1/rdx/hppy/Traf6/HUWE1/cpa/Aplip1
GO:BP	JNK cascade	GO:0007254	14/830	78/12175	0.000715613	0.00710001	0.00551517	lncRNA:Hsromega/Mnn1/ALiX/Sac1/sgg/flw/Lkb1/rdx/hppy/Traf6/Btk29A/HUWE1/cpa/Aplip1
GO:BP	membrane fusion	GO:0061025	12/830	61/12175	0.00072594	0.00717433	0.00557291	comt/Syt4/CG6454/TER94/Arl8/Sec5/PsGEF/Snap25/Syx5/CG3862/nSyb/Syt1
GO:BP	synaptic vesicle recycling via endosome	GO:0036466	5/830	12/12175	0.000769169	0.0075135	0.00583637	shi/Dap160/Synj/EndoA/Syt1
GO:BP	vesicle transport along microtubule	GO:0047496	5/830	12/12175	0.000769169	0.0075135	0.00583637	nudE/milt/Khc-73/BORCS5/Aplip1
GO:BP	tricarboxylic acid metabolic process	GO:0072350	5/830	12/12175	0.000769169	0.0075135	0.00583637	kdn/CG5028/Idh3b/Idh3a/Irp-1B
GO:BP	regulation of hippo signaling	GO:0035330	13/830	70/12175	0.000786176	0.00762078	0.0059197	Usp7/RtGEF/Ack/Tao/slmb/alpha-Spec/hppy/Herc4/Cul1/p38b/Sik2/CkIalpha/elgi
GO:BP	positive regulation of programmed cell death	GO:0043068	13/830	70/12175	0.000786176	0.00762078	0.0059197	lncRNA:Hsromega/Fmr1/TER94/Idh3b/E2f1/Lkb1/rdx/hppy/Mdh2/HtrA2/Atg1/Dp/CG9231
GO:BP	establishment of protein localization to membrane	GO:0090150	16/830	97/12175	0.000809913	0.00782092	0.00607516	comt/Trp1/GABPI/CG6454/app/Sec5/CG9393/Tom7/SrpRalpha/nmd/OXA1L/CG4908/Tom70/CG4942/Pex19/Vps35
GO:BP	growth	GO:0040007	47/830	429/12175	0.000816436	0.00785393	0.00610081	Atpalpha/shi/alphaSnap/Ten-m/futsch/Fmr1/Wbp2/SCCRO/Octbeta2R/TSG101/RtGEF/Rheb/Lk6/stau/sgg/Med/Actbeta/Tbce/Tao/Lkb1/alpha-Spec/stj/hppy/Dad/Arp3/Hs6st/Eps-15/arm/Syn1/p38b/beta-Spec/Imp/AMPKalpha/Atg1/CG9328/Mob2/bchs/Hph/LIMK1/Mad/drpr/Syp/eag/spri/vari/Rabex-5/pix
GO:BP	positive regulation of molecular function	GO:0044093	28/830	218/12175	0.000877296	0.00840742	0.00653075	Hk/qvr/TBC1D16/levy/CG6329/Dap160/SCCRO/Cyt-c-p/RhoGAP93B/RtGEF/sif/su(f)/RN-tre/stj/GAPcenA/Ccm3/CG5862/CG8155/IKKepsilon/HtrA2/smid/fry/ScsbetaA/CG7781/CG34408/Stim/AIMP2/eag
GO:BP	negative regulation of cell communication	GO:0010648	42/830	373/12175	0.000886	0.0084588	0.00657066	ATPsynD/Usp7/Fmr1/Dap160/Mnn1/TER94/PPP4R2r/Rheb/Sac1/sgg/Nmnat/Ack/flw/gcl/Tao/numb/slmb/rdx/hppy/Dad/Traf6/Herc4/CG14182/Cul1/pigs/Xxylt/p38b/HUWE1/Sik2/Synj/AMPKalpha/Npl4/Hrs/Atg1/CkIalpha/cpa/Cul4/LRR/pic/kek5/Ptp4E/Cow
GO:BP	regulation of actin polymerization or depolymerization	GO:0008064	13/830	71/12175	0.00090358	0.00856202	0.00665084	Arpc3A/shi/Vrp1/PsGEF/Arp3/Btk29A/spoon/p38b/Lam/tmod/cpa/gek/LRR
GO:BP	regulation of actin filament length	GO:0030832	13/830	71/12175	0.00090358	0.00856202	0.00665084	Arpc3A/shi/Vrp1/PsGEF/Arp3/Btk29A/spoon/p38b/Lam/tmod/cpa/gek/LRR
GO:BP	cell morphogenesis involved in differentiation	GO:0000904	51/830	478/12175	0.000910141	0.008592	0.00667413	SelR/Ten-m/Gclc/futsch/Fmr1/Khc/RhoGAP93B/TER94/nudE/sif/Rheb/Dlic/dpr11/beat-Ic/Sac1/sgg/Med/robo3/slmb/sff/alpha-Spec/AP-1sigma/mew/Dad/side/DIP-gamma/prel/pigs/beat-Ia/not/HUWE1/beta-Spec/bur/ct/AMPKalpha/shrb/Atg1/fry/Cont/LRP1/LIMK1/vvl/TrpRS/hts/spri/Nak/beat-VI/Fas1/Ptp4E/mmy/tutl
GO:BP	negative regulation of signaling	GO:0023057	42/830	374/12175	0.000934624	0.00879033	0.00682819	ATPsynD/Usp7/Fmr1/Dap160/Mnn1/TER94/PPP4R2r/Rheb/Sac1/sgg/Nmnat/Ack/flw/gcl/Tao/numb/slmb/rdx/hppy/Dad/Traf6/Herc4/CG14182/Cul1/pigs/Xxylt/p38b/HUWE1/Sik2/Synj/AMPKalpha/Npl4/Hrs/Atg1/CkIalpha/cpa/Cul4/LRR/pic/kek5/Ptp4E/Cow
GO:BP	negative regulation of intracellular signal transduction	GO:1902532	19/830	127/12175	0.00095199	0.0089205	0.0069293	ATPsynD/Usp7/Mnn1/Rheb/Sac1/sgg/Ack/flw/slmb/Herc4/Cul1/p38b/HUWE1/Sik2/AMPKalpha/Atg1/CkIalpha/cpa/LRR
GO:BP	regulation of cation transmembrane transport	GO:1904062	9/830	39/12175	0.00100586	0.00939053	0.00729442	Hk/qvr/porin/levy/CG6329/stj/CG7781/Stim/eag
GO:BP	exocytosis	GO:0006887	16/830	99/12175	0.00101631	0.00941229	0.00731131	comt/alphaSnap/Syt4/gammaSnap2/ALiX/Sec5/PsGEF/Csp/Vap33/Rop/Snap25/Syx5/Hrs/Syngr/nSyb/Syt1
GO:BP	glycoprotein biosynthetic process	GO:0009101	18/830	118/12175	0.00101935	0.00941229	0.00731131	FucTA/GCS1/FucT6/GlcAT-S/Mgat2/Alg11/sff/Uggt/CG6659/Hs6st/Xxylt/Pabp2/CG3149/sotv/CG31690/Ostgamma/mmy/GalT1
GO:BP	regulation of supramolecular fiber organization	GO:1902903	18/830	118/12175	0.00101935	0.00941229	0.00731131	Arpc3A/shi/futsch/Vrp1/alpha-Spec/PsGEF/Arp3/Ggamma1/Btk29A/spoon/p38b/Lam/tmod/beta-Spec/Efa6/cpa/gek/LRR
GO:BP	cellular cation homeostasis	GO:0030003	19/830	128/12175	0.00104837	0.00964502	0.00749209	IscU/Atpalpha/nrv3/Cisd2/CG1090/CG42542/Vha68-1/AGBE/Irp-1B/SPoCk/PMCA/Nckx30C/Fer1HCH/Mid1/Scox/Vha55/Syx5/Stim/VhaAC39-1
GO:BP	phospholipid dephosphorylation	GO:0046839	7/830	25/12175	0.00108168	0.00980878	0.0076193	CG14411/wun/Sac1/CG3632/INPP5E/Synj/CG6805
GO:BP	clathrin-dependent endocytosis	GO:0072583	7/830	25/12175	0.00108168	0.00980878	0.0076193	shi/Dap160/aux/Synj/EndoA/Nak/Syt1
GO:BP	positive regulation of cation transmembrane transport	GO:1904064	7/830	25/12175	0.00108168	0.00980878	0.0076193	Hk/qvr/CG6329/stj/CG7781/Stim/eag
GO:BP	regulation of cation channel activity	GO:2001257	7/830	25/12175	0.00108168	0.00980878	0.0076193	Hk/qvr/CG6329/stj/CG7781/Stim/eag
GO:BP	protein glycosylation	GO:0006486	16/830	100/12175	0.0011352	0.0102209	0.00793941	FucTA/GCS1/FucT6/Mgat2/Alg11/sff/Uggt/CG6659/Xxylt/Pabp2/CG3149/sotv/CG31690/Ostgamma/mmy/GalT1
GO:BP	macromolecule glycosylation	GO:0043413	16/830	100/12175	0.0011352	0.0102209	0.00793941	FucTA/GCS1/FucT6/Mgat2/Alg11/sff/Uggt/CG6659/Xxylt/Pabp2/CG3149/sotv/CG31690/Ostgamma/mmy/GalT1
GO:BP	cellular ion homeostasis	GO:0006873	19/830	129/12175	0.00115297	0.0103441	0.0080351	IscU/Atpalpha/nrv3/Cisd2/CG1090/CG42542/Vha68-1/AGBE/Irp-1B/SPoCk/PMCA/Nckx30C/Fer1HCH/Mid1/Scox/Vha55/Syx5/Stim/VhaAC39-1
GO:BP	mitochondrial electron transport, ubiquinol to cytochrome c	GO:0006122	5/830	13/12175	0.00118013	0.0103901	0.0080709	Cyt-c1/RFeSP/UQCR-Q/Cyt-c-p/UQCR-C2
GO:BP	establishment of mitochondrion localization, microtubule-mediated	GO:0034643	5/830	13/12175	0.00118013	0.0103901	0.0080709	Marf/Khc/Miro/milt/Aplip1
GO:BP	mitochondrion transport along microtubule	GO:0047497	5/830	13/12175	0.00118013	0.0103901	0.0080709	Marf/Khc/Miro/milt/Aplip1
GO:BP	establishment of mitochondrion localization	GO:0051654	5/830	13/12175	0.00118013	0.0103901	0.0080709	Marf/Khc/Miro/milt/Aplip1
GO:BP	synaptic vesicle endosomal processing	GO:0099532	5/830	13/12175	0.00118013	0.0103901	0.0080709	shi/Dap160/Synj/EndoA/Syt1
GO:BP	monosaccharide metabolic process	GO:0005996	13/830	73/12175	0.00118275	0.0103901	0.0080709	Gapdh1/Pfk/Tpi/Eno/Pgk/Gapdh2/Actbeta/Gbs-76A/GlyS/CG6650/Atg1/PCB/alpha-Man-IIa
GO:BP	vesicle fusion	GO:0006906	11/830	56/12175	0.00121165	0.0105342	0.00818283	comt/Syt4/CG6454/TER94/Arl8/Sec5/PsGEF/Snap25/Syx5/nSyb/Syt1
GO:BP	intracellular protein transmembrane transport	GO:0065002	11/830	56/12175	0.00121165	0.0105342	0.00818283	Trp1/Hsp60A/CG6454/Hsc70-5/CG7382/Tom7/Roe1/Tom40/Tom70/CG8531/AIF
GO:BP	protein transmembrane transport	GO:0071806	11/830	56/12175	0.00121165	0.0105342	0.00818283	Trp1/Hsp60A/CG6454/Hsc70-5/CG7382/Tom7/Roe1/Tom40/Tom70/CG8531/AIF
GO:BP	tRNA aminoacylation	GO:0043039	9/830	40/12175	0.00122068	0.0105764	0.00821559	AspRS-m/ValRS-m/PheRS-m/ThrRS/MetRS-m/TrpRS-m/TrpRS/LeuRS/AlaRS
GO:BP	developmental maturation	GO:0021700	28/830	224/12175	0.00133563	0.0115329	0.00895859	lost/GABPI/Vps28/Fmr1/Khc/hdc/TSG101/stau/Sac1/Vps4/flw/Stam/gcl/slmb/Lkb1/alpha-Spec/milt/IKKepsilon/Cul1/p38b/Rop/Imp/shrb/Hrs/Cont/drpr/Syp/Syt1
GO:BP	export from cell	GO:0140352	29/830	236/12175	0.0014443	0.0124288	0.00965452	Atpalpha/comt/nrv3/Frq1/alphaSnap/Syt4/gammaSnap2/Arf51F/deltaCOP/ALiX/Ih/Arl8/Sec5/PsGEF/SrpRalpha/Csp/Vap33/Rop/Snap25/Syx5/Snx3/Hrs/Rab3-GAP/Mctp/Vps35/Syngr/nSyb/Syt1/AdipoR
GO:BP	protein modification by small protein conjugation	GO:0032446	30/830	247/12175	0.00145208	0.0124534	0.00967359	Mkrn1/CG4238/CG9941/SCCRO/msl-2/Ufl1/gcl/CG8188/slmb/rdx/CG2218/Traf6/CG1812/CG17754/Bruce/ari-1/Herc4/Cul1/HUWE1/CG1317/Bre1/Cdc27/bchs/CG6325/elgi/Cul4/pic/Kdm2/Rabex-5/CG10646
GO:BP	amino acid activation	GO:0043038	9/830	41/12175	0.00147103	0.0125543	0.00975197	AspRS-m/ValRS-m/PheRS-m/ThrRS/MetRS-m/TrpRS-m/TrpRS/LeuRS/AlaRS
GO:BP	protein polyubiquitination	GO:0000209	15/830	93/12175	0.00147376	0.0125543	0.00975197	Mkrn1/CG4238/msl-2/gcl/CG8188/slmb/rdx/CG2218/Traf6/Bruce/ari-1/Herc4/Cul1/HUWE1/elgi
GO:BP	establishment of protein localization to organelle	GO:0072594	24/830	183/12175	0.00149443	0.0126876	0.00985555	Trp1/Hsp60A/Vps28/UQCR-C1/Hsc70-5/sgg/CG7382/Stam/CG9393/rdx/Tom7/Roe1/Tom40/SrpRalpha/CG7791/OXA1L/CG4908/Tom70/Tnpo/CG4942/Pex19/CG8531/AIF/msk
GO:BP	regulation of cellular protein metabolic process	GO:0032268	51/830	491/12175	0.00163941	0.0138719	0.0107755	shi/Mkrn1/lncRNA:Hsromega/bsf/Fmr1/Dap160/SCCRO/Cyt-c-p/Wee1/TER94/Rheb/Lk6/stau/sgg/Actbeta/bol/Ufl1/slmb/Rnf146/Dad/ari-1/mEFTs/Ccm3/IKKepsilon/Cul1/spoon/HtrA2/eIF4EHP/CG14408/Pabp2/CG15445/fry/CkIalpha/Mob2/bchs/ScsbetaA/PAN2/CG7414/rswl/Lpt/Pop2/Ltn1/CG9951/Syp/CG9098/Kdm2/Rabex-5/Dp1/bin3/per/mmy
GO:BP	regulation of anatomical structure size	GO:0090066	29/830	238/12175	0.00164519	0.0138744	0.0107774	Arpc3A/Atpalpha/shi/Fmr1/Vrp1/deltaCOP/Rheb/Actbeta/PsGEF/hppy/dop/Arp3/Btk29A/spoon/p38b/Lam/Hs3st-B/tmod/AMPKalpha/Nrx-IV/cpa/gek/sano/vari/LRR/Pvf3/Rabex-5/Lac/mmy
GO:BP	regulation of mitochondrion organization	GO:0010821	8/830	34/12175	0.00166751	0.0139695	0.0108513	QIL1/Sod2/Marf/SREBP/Miro/Miga/CG9231/Drp1
GO:BP	positive regulation of ion transport	GO:0043270	8/830	34/12175	0.00166751	0.0139695	0.0108513	Hk/qvr/levy/CG6329/stj/CG7781/Stim/eag
GO:BP	potassium ion transport	GO:0006813	12/830	67/12175	0.00171585	0.01428	0.0110924	Atpalpha/nrv3/Hk/qvr/CG6329/CG42594/Ih/sei/CG7781/SK/eag/CG1824
GO:BP	regulation of microtubule-based process	GO:0032886	12/830	67/12175	0.00171585	0.01428	0.0110924	futsch/sgg/slmb/alpha-Spec/tws/pigs/Lam/beta-Spec/BORCS5/ens/Efa6/CG6805
GO:BP	glutamine family amino acid catabolic process	GO:0009065	5/830	14/12175	0.00173348	0.0143	0.011108	slgA/P5CDh1/Gdh/GLS/Gad1
GO:BP	positive regulation of apoptotic process	GO:0043065	10/830	50/12175	0.0017344	0.0143	0.011108	lncRNA:Hsromega/TER94/E2f1/Lkb1/rdx/hppy/HtrA2/Atg1/Dp/CG9231
GO:BP	glycosylation	GO:0070085	16/830	104/12175	0.00173522	0.0143	0.011108	FucTA/GCS1/FucT6/Mgat2/Alg11/sff/Uggt/CG6659/Xxylt/Pabp2/CG3149/sotv/CG31690/Ostgamma/mmy/GalT1
GO:BP	regulation of ion transmembrane transport	GO:0034765	9/830	42/12175	0.00176102	0.0144187	0.0112002	Hk/qvr/porin/levy/CG6329/stj/CG7781/Stim/eag
GO:BP	calcium ion transmembrane transport	GO:0070588	9/830	42/12175	0.00176102	0.0144187	0.0112002	porin/CG1090/CG42542/SPoCk/stj/PMCA/Nckx30C/Mid1/Stim
GO:BP	plasma membrane organization	GO:0007009	7/830	27/12175	0.00177298	0.0144698	0.0112399	EndoB/scramb1/alpha-Spec/Arp3/beta-Spec/EndoA/nes
GO:BP	regulation of cellular response to stress	GO:0080135	18/830	124/12175	0.00181717	0.0147828	0.011483	lncRNA:Hsromega/Mnn1/ALiX/Sac1/sgg/Egm/flw/Lkb1/rdx/hppy/Traf6/p38b/HUWE1/Imp/cpa/CG2921/spn-A/Aplip1
GO:BP	positive regulation of cell death	GO:0010942	15/830	95/12175	0.00183436	0.0148748	0.0115545	lncRNA:Hsromega/Fmr1/TER94/Idh3b/Rheb/E2f1/Lkb1/rdx/hppy/Traf6/Mdh2/HtrA2/Atg1/Dp/CG9231
GO:BP	potassium ion transmembrane transport	GO:0071805	11/830	59/12175	0.00188962	0.0152739	0.0118645	Atpalpha/nrv3/Hk/qvr/CG6329/CG42594/sei/CG7781/SK/eag/CG1824
GO:BP	anatomical structure maturation	GO:0071695	25/830	197/12175	0.00191598	0.0154377	0.0119917	lost/Vps28/Fmr1/Khc/hdc/TSG101/stau/Vps4/flw/Stam/gcl/slmb/Lkb1/alpha-Spec/milt/IKKepsilon/Cul1/Rop/Imp/shrb/Hrs/Cont/drpr/Syp/Syt1
GO:BP	hippo signaling	GO:0035329	13/830	77/12175	0.0019587	0.0157318	0.0122202	Usp7/RtGEF/Ack/Tao/slmb/alpha-Spec/hppy/Herc4/Cul1/p38b/Sik2/CkIalpha/elgi
GO:BP	cellular amino acid metabolic process	GO:0006520	21/830	156/12175	0.00208029	0.0166555	0.0129377	slgA/CG9674/P5CDh1/Gabat/Ssadh/P5cr/AspRS-m/ValRS-m/PheRS-m/Gdh/ThrRS/CG1440/GLS/MetRS-m/CG17896/AhcyL1/Gad1/TrpRS-m/TrpRS/LeuRS/AlaRS
GO:BP	cellular chemical homeostasis	GO:0055082	20/830	146/12175	0.00213095	0.0170072	0.013211	IscU/Atpalpha/nrv3/Hex-A/Cisd2/CG1090/CG42542/Vha68-1/AGBE/Irp-1B/SPoCk/PMCA/Nckx30C/Fer1HCH/Mid1/Scox/Vha55/Syx5/Stim/VhaAC39-1
GO:BP	protein targeting	GO:0006605	19/830	136/12175	0.00216549	0.0172286	0.0133829	Trp1/GABPI/Hsp60A/CG6454/app/UQCR-C1/Hsc70-5/CG7382/CG9393/Tom7/Roe1/Tom40/SrpRalpha/CG7791/milt/Tom70/Pex19/CG8531/AIF
GO:BP	receptor-mediated endocytosis	GO:0006898	11/830	60/12175	0.00217443	0.0172455	0.013396	shi/LpR2/LpR1/Dap160/aux/Synj/Hrs/EndoA/spri/Nak/Syt1
GO:BP	establishment of protein localization to mitochondrial membrane	GO:0090151	6/830	21/12175	0.00220251	0.0174136	0.0135266	CG9393/Tom7/OXA1L/CG4908/Tom70/CG4942
GO:BP	programmed cell death involved in cell development	GO:0010623	15/830	97/12175	0.00226568	0.0178572	0.0138712	shi/hdc/TER94/Idh3b/wun/E2f1/slmb/Mdh2/Bruce/arm/HtrA2/Atg1/Dp/drpr/AIF
GO:BP	chemotaxis	GO:0006935	32/830	277/12175	0.00232664	0.0182807	0.0142002	SelR/Ten-m/Fmr1/Khc/RhoGAP93B/Rheb/wun/dpr11/beat-Ic/Sac1/Med/robo3/alpha-Spec/AP-1sigma/mew/Dad/side/DIP-gamma/beat-Ia/beta-Spec/bur/ct/AMPKalpha/Cont/LRP1/vvl/hts/beat-VI/Fas1/Ptp4E/mmy/tutl
GO:BP	regulation of transmembrane transporter activity	GO:0022898	8/830	36/12175	0.00246242	0.019169	0.0148901	Hk/qvr/levy/CG6329/stj/CG7781/Stim/eag
GO:BP	regulation of transporter activity	GO:0032409	8/830	36/12175	0.00246242	0.019169	0.0148901	Hk/qvr/levy/CG6329/stj/CG7781/Stim/eag
GO:BP	regulation of ion transmembrane transporter activity	GO:0032412	8/830	36/12175	0.00246242	0.019169	0.0148901	Hk/qvr/levy/CG6329/stj/CG7781/Stim/eag
GO:BP	neuron projection guidance	GO:0097485	31/830	268/12175	0.00264802	0.0205506	0.0159633	SelR/Ten-m/Fmr1/Khc/RhoGAP93B/Rheb/dpr11/beat-Ic/Sac1/Med/robo3/alpha-Spec/AP-1sigma/mew/Dad/side/DIP-gamma/beat-Ia/beta-Spec/bur/ct/AMPKalpha/Cont/LRP1/vvl/hts/beat-VI/Fas1/Ptp4E/mmy/tutl
GO:BP	cytochrome complex assembly	GO:0017004	7/830	29/12175	0.00276563	0.0213977	0.0166214	CG11562/Cchl/COX6B/OXA1L/Scox/CG4908/CG4942
GO:BP	protein transmembrane import into intracellular organelle	GO:0044743	9/830	45/12175	0.00291351	0.0224731	0.0174567	Hsp60A/Hsc70-5/CG7382/Tom7/Roe1/Tom40/Tom70/CG8531/AIF
GO:BP	regulation of molecular function	GO:0065009	42/830	398/12175	0.00306188	0.0234489	0.0182147	blw/Hk/qvr/TBC1D16/levy/CG6329/Dap160/SCCRO/Cyt-c-p/RhoGAP93B/Wee1/RtGEF/sif/su(f)/RN-tre/sgg/stj/Fem-1/RhoGAP19D/GAPcenA/Ccm3/CG5862/CG8155/ArfGAP1/IKKepsilon/HtrA2/smid/drongo/bur/CG14408/fry/Rab3-GAP/ScsbetaA/Asx/CG7781/CG34408/Stim/AIMP2/ArfGAP3/eag/CG42795/per
GO:BP	small molecule catabolic process	GO:0044282	21/830	161/12175	0.00306259	0.0234489	0.0182147	slgA/P5CDh1/Pfk/CG6330/Tpi/Gabat/Ssadh/Eno/Egm/Oscillin/Gdh/Ipp/CG1440/Synj/GLS/CG17896/CG6805/AhcyL1/Gad1/Mtpbeta/CG8778
GO:BP	regulation of Wnt signaling pathway	GO:0030111	15/830	100/12175	0.00306782	0.0234489	0.0182147	TER94/sgg/flw/slmb/Nulp1/tws/Rnf146/Cul1/HUWE1/sotv/CkIalpha/Kap3/Vps35/apolpp/Cow
GO:BP	actin filament organization	GO:0007015	22/830	172/12175	0.00315651	0.0240541	0.0186849	Arpc3A/shi/SelR/Vrp1/Khc/ALiX/Msp300/mew/PsGEF/Arp3/Btk29A/IKKepsilon/spoon/pigs/p38b/Lam/tmod/Hip1/cpa/gek/hts/LRR
GO:BP	axon guidance	GO:0007411	30/830	260/12175	0.00319248	0.0242552	0.018841	SelR/Ten-m/Fmr1/Khc/RhoGAP93B/Rheb/dpr11/beat-Ic/Sac1/Med/robo3/alpha-Spec/AP-1sigma/mew/Dad/side/DIP-gamma/beat-Ia/beta-Spec/bur/AMPKalpha/Cont/LRP1/vvl/hts/beat-VI/Fas1/Ptp4E/mmy/tutl
GO:BP	glycogen biosynthetic process	GO:0005978	4/830	10/12175	0.00322961	0.024369	0.0189295	AGBE/Gbs-76A/GlyS/Pgm1
GO:BP	glucan biosynthetic process	GO:0009250	4/830	10/12175	0.00322961	0.024369	0.0189295	AGBE/Gbs-76A/GlyS/Pgm1
GO:BP	metal ion transport	GO:0030001	29/830	249/12175	0.00323636	0.024369	0.0189295	Teh1/Atpalpha/nrv3/Fkbp59/Hk/qvr/porin/mfrn/CG6329/NKAIN/CG1090/CG42542/CG42594/Ih/SPoCk/stj/PMCA/Nckx30C/Fer1HCH/Mid1/CG1358/dpr3/sei/Hmt-1/CG7781/SK/Stim/eag/CG1824
GO:BP	regulation of canonical Wnt signaling pathway	GO:0060828	14/830	91/12175	0.00328469	0.0246596	0.0191552	TER94/sgg/flw/slmb/Nulp1/tws/Rnf146/Cul1/HUWE1/sotv/CkIalpha/Kap3/apolpp/Cow
GO:BP	polysaccharide biosynthetic process	GO:0000271	5/830	16/12175	0.00337353	0.0249245	0.0193609	AGBE/Gbs-76A/GlyS/sotv/Pgm1
GO:BP	cellular polysaccharide biosynthetic process	GO:0033692	5/830	16/12175	0.00337353	0.0249245	0.0193609	AGBE/Gbs-76A/GlyS/sotv/Pgm1
GO:BP	positive regulation of voltage-gated potassium channel activity	GO:1903818	5/830	16/12175	0.00337353	0.0249245	0.0193609	Hk/qvr/CG6329/CG7781/eag
GO:BP	protein import into mitochondrial matrix	GO:0030150	7/830	30/12175	0.00339879	0.0249245	0.0193609	Hsc70-5/CG7382/Tom7/Roe1/Tom40/Tom70/CG8531
GO:BP	entry into host	GO:0044409	7/830	30/12175	0.00339879	0.0249245	0.0193609	shi/TER94/TSG101/Vps4/Vps29/shrb/betaCOP
GO:BP	viral entry into host cell	GO:0046718	7/830	30/12175	0.00339879	0.0249245	0.0193609	shi/TER94/TSG101/Vps4/Vps29/shrb/betaCOP
GO:BP	biological process involved in interaction with host	GO:0051701	7/830	30/12175	0.00339879	0.0249245	0.0193609	shi/TER94/TSG101/Vps4/Vps29/shrb/betaCOP
GO:BP	movement in host environment	GO:0052126	7/830	30/12175	0.00339879	0.0249245	0.0193609	shi/TER94/TSG101/Vps4/Vps29/shrb/betaCOP
GO:BP	apoptotic process	GO:0006915	29/830	250/12175	0.00343071	0.0250858	0.0194863	mbl/Coa8/lncRNA:Hsromega/Hsp60A/futsch/porin/CG4238/TER94/RYBP/E2f1/Ack/Tao/slmb/crq/Drep4/Lkb1/rdx/hppy/Bruce/Miro/Cul1/HtrA2/Atg1/Dp/CG9231/Msh6/AIF/msk/pix
GO:BP	regulation of membrane potential	GO:0042391	13/830	82/12175	0.00347467	0.0253036	0.0196554	ATPsynD/qvr/Nmdar1/CG42594/Hsc70-5/Ih/shakB/nAChRbeta1/sei/nAChRalpha2/SK/eag/Piezo
GO:BP	protein phosphorylation	GO:0006468	37/830	342/12175	0.00348699	0.0253036	0.0196554	shi/CG8485/Dap160/CG4629/Cdc2rk/Wee1/Lk6/aux/sgg/Actbeta/Ack/PKD/Tao/sff/SRPK/Lkb1/hppy/Dad/dop/S6KL/Ccm3/Btk29A/IKKepsilon/p38b/Sik2/CG14408/AMPKalpha/Atg1/fry/CkIalpha/Mob2/gek/LIMK1/Nak/CG9098/per/Cdk12
GO:BP	cell maturation	GO:0048469	24/830	195/12175	0.00349562	0.0253036	0.0196554	lost/Vps28/Fmr1/Khc/hdc/TSG101/stau/Vps4/flw/Stam/gcl/slmb/Lkb1/alpha-Spec/milt/IKKepsilon/Cul1/Rop/Imp/shrb/Hrs/drpr/Syp/Syt1
GO:BP	secretion by cell	GO:0032940	27/830	228/12175	0.0035005	0.0253036	0.0196554	comt/Frq1/alphaSnap/Syt4/gammaSnap2/Arf51F/deltaCOP/ALiX/Ih/Arl8/Sec5/PsGEF/SrpRalpha/Csp/Vap33/Rop/Snap25/Syx5/Snx3/Hrs/Rab3-GAP/Mctp/Vps35/Syngr/nSyb/Syt1/AdipoR
GO:BP	organelle disassembly	GO:1903008	8/830	38/12175	0.0035268	0.0254211	0.0197467	Sod2/Khc/Atg3/Hsc70-5/SREBP/CG5676/Atg1/pix
GO:BP	cellular amino acid catabolic process	GO:0009063	10/830	55/12175	0.00362899	0.0260834	0.0202611	slgA/P5CDh1/Gabat/Ssadh/Gdh/CG1440/GLS/CG17896/AhcyL1/Gad1
GO:BP	calcium ion transport	GO:0006816	11/830	64/12175	0.00368141	0.0263852	0.0204956	Fkbp59/porin/CG1090/CG42542/SPoCk/stj/PMCA/Nckx30C/Mid1/dpr3/Stim
GO:BP	regulation of developmental growth	GO:0048638	27/830	230/12175	0.00394956	0.0282054	0.0219095	futsch/Fmr1/Wbp2/Octbeta2R/TSG101/RtGEF/Rheb/stau/sgg/Med/Actbeta/Tbce/Tao/alpha-Spec/stj/Dad/Arp3/Hs6st/Eps-15/Syn1/p38b/beta-Spec/Mob2/bchs/Mad/Syp/Rabex-5
GO:BP	cell-cell signaling by wnt	GO:0198738	18/830	133/12175	0.00395767	0.0282054	0.0219095	TER94/sgg/flw/slmb/Nulp1/tws/Rnf146/arm/Cul1/HUWE1/Snx3/Hrs/sotv/CkIalpha/Kap3/Vps35/apolpp/Cow
GO:BP	protein import	GO:0017038	15/830	103/12175	0.00409023	0.0290682	0.0225797	Hsp60A/Hsc70-5/sgg/CG7382/CG9393/rdx/Tom7/Roe1/Tom40/Tom70/Tnpo/Pex19/CG8531/AIF/msk
GO:BP	regulation of actin filament organization	GO:0110053	13/830	84/12175	0.00430042	0.0304764	0.0236736	Arpc3A/shi/Vrp1/PsGEF/Arp3/Btk29A/spoon/p38b/Lam/tmod/cpa/gek/LRR
GO:BP	nurse cell apoptotic process	GO:0045476	5/830	17/12175	0.00451438	0.0319033	0.024782	E2f1/slmb/Bruce/Atg1/Dp
GO:BP	cellular component maintenance	GO:0043954	6/830	24/12175	0.00458399	0.032305	0.025094	shi/Ten-m/Nmnat/alpha-Spec/beta-Spec/Synj
GO:BP	regulation of cytoskeleton organization	GO:0051493	21/830	167/12175	0.00472816	0.0332285	0.0258114	Arpc3A/shi/futsch/Vrp1/sgg/alpha-Spec/PsGEF/Arp3/Ggamma1/Btk29A/IKKepsilon/spoon/pigs/p38b/Lam/tmod/beta-Spec/Efa6/cpa/gek/LRR
GO:BP	cell surface receptor signaling pathway involved in cell-cell signaling	GO:1905114	17/830	125/12175	0.00477794	0.0333871	0.0259346	qvr/TER94/sgg/flw/slmb/Nulp1/tws/Rnf146/arm/Cul1/HUWE1/sotv/CkIalpha/Kap3/Vps35/apolpp/Cow
GO:BP	dopamine transport	GO:0015872	4/830	11/12175	0.00480352	0.0333871	0.0259346	Syt4/Ih/PsGEF/Syt1
GO:BP	maintenance of presynaptic active zone structure	GO:0048790	4/830	11/12175	0.00480352	0.0333871	0.0259346	Ten-m/alpha-Spec/beta-Spec/Synj
GO:BP	catecholamine transport	GO:0051937	4/830	11/12175	0.00480352	0.0333871	0.0259346	Syt4/Ih/PsGEF/Syt1
GO:BP	regulation of GTPase activity	GO:0043087	14/830	95/12175	0.00488695	0.033874	0.0263127	TBC1D16/RhoGAP93B/RtGEF/sif/RN-tre/RhoGAP19D/GAPcenA/CG8155/ArfGAP1/drongo/Rab3-GAP/CG34408/ArfGAP3/CG42795
GO:BP	heart morphogenesis	GO:0003007	8/830	40/12175	0.00491654	0.0338933	0.0263278	Sod2/Ggamma1/arm/p38b/Nrx-IV/Cont/Cat/Lac
GO:BP	regulation of generation of precursor metabolites and energy	GO:0043467	8/830	40/12175	0.00491654	0.0338933	0.0263278	Chchd2/bsf/levy/COX7A/Actbeta/Gbs-76A/GlyS/Atg1
GO:BP	biological process involved in symbiotic interaction	GO:0044403	7/830	32/12175	0.0049895	0.0343028	0.0266459	shi/TER94/TSG101/Vps4/Vps29/shrb/betaCOP
GO:BP	terminal branching, open tracheal system	GO:0007430	6/830	25/12175	0.00568998	0.0390126	0.0303044	Vha26/hdc/Rheb/Lam/Hph/VhaAC39-1
GO:BP	negative regulation of hippo signaling	GO:0035331	8/830	41/12175	0.00575182	0.03933	0.0305509	Usp7/Ack/slmb/Herc4/Cul1/p38b/Sik2/CkIalpha
GO:BP	taxis	GO:0042330	36/830	341/12175	0.00581046	0.0396239	0.0307792	slgA/CG6330/SelR/Ten-m/Fmr1/Khc/Nmdar1/RhoGAP93B/Rheb/wun/dpr11/beat-Ic/Sac1/Med/robo3/alpha-Spec/AP-1sigma/mew/Dad/side/DIP-gamma/beat-Ia/beta-Spec/bur/ct/AMPKalpha/Cont/LRP1/vvl/hts/beat-VI/Fas1/Gycalpha99B/Ptp4E/mmy/tutl
GO:BP	positive regulation of potassium ion transmembrane transporter activity	GO:1901018	5/830	18/12175	0.00590502	0.0401605	0.031196	Hk/qvr/CG6329/CG7781/eag
GO:BP	exocytic process	GO:0140029	9/830	50/12175	0.00607499	0.0412057	0.0320079	comt/alphaSnap/gammaSnap2/Sec5/Vap33/Rop/Snap25/Syx5/nSyb
GO:BP	regulation of reproductive process	GO:2000241	16/830	118/12175	0.00626531	0.042383	0.0329224	Mkrn1/Khc/stau/E2f1/slmb/Bruce/Cul1/Rop/Hrs/Atg1/CG6805/Dp/elgi/rux/spri/Syt1
GO:BP	positive regulation of developmental process	GO:0051094	26/830	227/12175	0.00638115	0.0429481	0.0333614	Marf/Mkrn1/Fmr1/Wbp2/Dap160/Octbeta2R/nudE/sif/Rheb/stau/Med/Actbeta/E2f1/slmb/Arp3/ari-1/Cul1/p38b/Rop/Imp/Atg1/Dp/bchs/Mad/Drp1/pyr
GO:BP	regulation of protein-containing complex assembly	GO:0043254	15/830	108/12175	0.00639978	0.0429481	0.0333614	Arpc3A/shi/Vrp1/PsGEF/Dad/Arp3/Btk29A/spoon/p38b/Lam/tmod/Efa6/cpa/gek/LRR
GO:BP	canonical Wnt signaling pathway	GO:0060070	15/830	108/12175	0.00639978	0.0429481	0.0333614	TER94/sgg/flw/slmb/Nulp1/tws/Rnf146/arm/Cul1/HUWE1/sotv/CkIalpha/Kap3/apolpp/Cow
GO:BP	phosphatidylinositol metabolic process	GO:0046488	13/830	88/12175	0.00642486	0.0430023	0.0334035	frj/Ttc7/CG14411/Sac1/PGAP1/CG3632/Ipp/Vap33/INPP5E/Synj/CG6805/CG7990/PIG-Q
GO:BP	secretion	GO:0046903	28/830	250/12175	0.00646637	0.0431456	0.0335148	comt/Frq1/alphaSnap/Syt4/gammaSnap2/Arf51F/deltaCOP/ALiX/Ih/Arl8/Sec5/PsGEF/SrpRalpha/Csp/Vap33/CG3009/Rop/Snap25/Syx5/Snx3/Hrs/Rab3-GAP/Mctp/Vps35/Syngr/nSyb/Syt1/AdipoR
GO:BP	actin cytoskeleton organization	GO:0030036	33/830	308/12175	0.00648037	0.0431456	0.0335148	Arpc3A/shi/SelR/Arf51F/Vrp1/Khc/ALiX/Msp300/sif/Ack/Vps4/flw/ghi/alpha-Spec/mew/PsGEF/Arp3/Ggamma1/Btk29A/IKKepsilon/spoon/pigs/p38b/Lam/tmod/beta-Spec/Hip1/CG33521/cpa/gek/LIMK1/hts/LRR
GO:BP	glycerol-3-phosphate metabolic process	GO:0006072	4/830	12/12175	0.0068207	0.0444752	0.0345476	CG8298/Gpo1/Gpdh1/Gk2
GO:BP	acetyl-CoA metabolic process	GO:0006084	4/830	12/12175	0.0068207	0.0444752	0.0345476	Pdhb/muc/Pdha/Hmgs
GO:BP	axonal defasciculation	GO:0007414	4/830	12/12175	0.0068207	0.0444752	0.0345476	beat-Ic/mew/beat-Ia/tutl
GO:BP	monoamine transport	GO:0015844	4/830	12/12175	0.0068207	0.0444752	0.0345476	Syt4/Ih/PsGEF/Syt1
GO:BP	ubiquitin-dependent protein catabolic process via the multivesicular body sorting pathway	GO:0043162	4/830	12/12175	0.0068207	0.0444752	0.0345476	Vps28/ALiX/Stam/shrb
GO:BP	regulation of amine transport	GO:0051952	4/830	12/12175	0.0068207	0.0444752	0.0345476	Syt4/Ih/PsGEF/Syt1
GO:BP	alditol phosphate metabolic process	GO:0052646	4/830	12/12175	0.0068207	0.0444752	0.0345476	CG8298/Gpo1/Gpdh1/Gk2
GO:BP	cell adhesion involved in heart morphogenesis	GO:0061343	4/830	12/12175	0.0068207	0.0444752	0.0345476	Ggamma1/Nrx-IV/Cont/Lac
GO:BP	carbohydrate biosynthetic process	GO:0016051	9/830	51/12175	0.00694214	0.0449266	0.0348983	Tpi/Pgk/Mgat2/AGBE/Gbs-76A/GlyS/sotv/PCB/Pgm1
GO:BP	germarium-derived oocyte fate determination	GO:0007294	6/830	26/12175	0.00697872	0.0449266	0.0348983	Fmr1/nudE/alpha-Spec/cpa/spn-A/hts
GO:BP	negative regulation of protein-containing complex assembly	GO:0031333	6/830	26/12175	0.00697872	0.0449266	0.0348983	Dad/spoon/tmod/Efa6/cpa/LRR
GO:BP	protein insertion into membrane	GO:0051205	6/830	26/12175	0.00697872	0.0449266	0.0348983	CG9393/Tom7/OXA1L/CG4908/Tom70/CG4942
GO:BP	sulfur compound transport	GO:0072348	6/830	26/12175	0.00697872	0.0449266	0.0348983	CG4743/CG1907/Dic1/Eaat2/Tpc1/CG6928
GO:BP	regulation of synaptic plasticity	GO:0048167	7/830	34/12175	0.00708303	0.0454824	0.03533	shi/comt/Sod2/Syt4/Snap25/Mctp/Cat
GO:BP	actin filament-based process	GO:0030029	34/830	322/12175	0.00719863	0.0461077	0.0358157	Arpc3A/shi/SelR/Arf51F/Vrp1/Khc/ALiX/Msp300/sif/Ack/Vps4/flw/ghi/alpha-Spec/mew/PsGEF/Arp3/Ggamma1/Btk29A/IKKepsilon/spoon/pigs/p38b/Lam/tmod/beta-Spec/Hip1/CG33521/cpa/gek/LIMK1/Mlc-c/hts/LRR
GO:BP	Wnt signaling pathway	GO:0016055	16/830	120/12175	0.00736034	0.0470244	0.0365278	TER94/sgg/flw/slmb/Nulp1/tws/Rnf146/arm/Cul1/HUWE1/sotv/CkIalpha/Kap3/Vps35/apolpp/Cow
GO:BP	response to abiotic stimulus	GO:0009628	43/830	431/12175	0.00748245	0.0475342	0.0369238	slgA/Atpalpha/nrv3/CG6330/Fkbp59/Tpi/MagR/Hsp60A/Tsp42Ej/Fmr1/porin/Nmdar1/Trap1/Mnn1/Ucp4A/Vha68-1/Ih/nocte/Arl8/shakB/stj/Tom40/Gpdh1/spoon/RecQ5/l(2)37Cc/p38b/Rop/UGP/inaE/fbl/Hcs/Droj2/Hph/CG9231/Gad1/VhaAC39-1/Cerk/Piezo/Gycalpha99B/per/CG8778/tutl
GO:BP	cellular response to chemical stimulus	GO:0070887	46/830	468/12175	0.00756955	0.0475342	0.0369238	Sod2/Mkrn1/Chchd2/Hsp60A/ths/Syt4/Fmr1/Trap1/Herp/Rheb/Vha68-1/wun/Hsc70-5/sgg/Med/Egm/Ack/Tao/slmb/rdx/PsGEF/Dad/Traf6/Uggt/Tom40/Der-2/Cul1/l(2)37Cc/p38b/HUWE1/Sik2/Gbeta5/GlyS/Atg1/sotv/Hph/CG9231/Mad/5-HT7/Lpt/VhaAC39-1/pyr/kek5/Ptp4E/Syt1/AdipoR
GO:BP	mitochondrial cytochrome c oxidase assembly	GO:0033617	5/830	19/12175	0.00757166	0.0475342	0.0369238	CG11562/COX6B/OXA1L/Scox/CG4942
GO:BP	positive regulation of potassium ion transport	GO:0043268	5/830	19/12175	0.00757166	0.0475342	0.0369238	Hk/qvr/CG6329/CG7781/eag
GO:BP	selective autophagy	GO:0061912	5/830	19/12175	0.00757166	0.0475342	0.0369238	Atg3/Rheb/AMPKalpha/GlyS/Atg1
GO:BP	regulation of potassium ion transmembrane transporter activity	GO:1901016	5/830	19/12175	0.00757166	0.0475342	0.0369238	Hk/qvr/CG6329/CG7781/eag
GO:BP	positive regulation of potassium ion transmembrane transport	GO:1901381	5/830	19/12175	0.00757166	0.0475342	0.0369238	Hk/qvr/CG6329/CG7781/eag
GO:BP	microtubule polymerization or depolymerization	GO:0031109	10/830	61/12175	0.00774322	0.0484909	0.037667	futsch/Khc/nudE/Tbce/alpha-Spec/pigs/beta-Spec/ens/Efa6/Grip163
GO:BP	regulation of programmed cell death	GO:0043067	24/830	208/12175	0.00783343	0.0488142	0.0379181	lncRNA:Hsromega/futsch/Fmr1/porin/CG4238/TER94/Idh3b/RYBP/E2f1/Ack/slmb/Lkb1/rdx/hppy/Mdh2/Bruce/Cul1/HtrA2/Atg1/Dp/CG9231/Aatf/msk/pix
GO:BP	regulation of nervous system development	GO:0051960	24/830	208/12175	0.00783343	0.0488142	0.0379181	Fmr1/Dap160/hdc/Octbeta2R/nudE/sif/Rheb/stau/sgg/Med/Actbeta/Tao/numb/slmb/tws/stj/Dad/Arp3/ari-1/Hs3st-B/Mob2/Mad/Syp/pyr
GO:BP	positive regulation of cellular catabolic process	GO:0031331	19/830	153/12175	0.00798208	0.0496184	0.0385427	shi/TER94/sgg/Actbeta/slmb/Rnf146/Traf6/ari-1/Cul1/Synj/AMPKalpha/Pabp2/GlyS/Atg1/CycC/CkIalpha/PAN2/Pop2/CG9951
	Description	ID	GeneRatio	BgRatio	pvalue	p.adjust	qvalue	geneID
GO:CC	mitochondrial protein-containing complex	GO:0098798	97/824	256/12100	4.0929e-48	1.68218e-45	1.18909e-45	Cyt-c1/ND-30/blw/COX4/ATPsynF/QIL1/ATPsynbeta/ATPsynC/COX5A/SdhD/ATPsynD/ND-B14.7/ATPsyngamma/SdhC/ND-B14.5B/ND-18/ND-49/ND-19/mRpL45/ND-20/mRpS33/SdhA/mRpS23/ND-75/COX5B/mRpL35/mRpL27/RFeSP/sun/ND-ACP/ND-39/UQCR-Q/mRpS30/mRpL24/CG7430/ND-B14.5A/ND-MWFE/ATPsynCF6/mRpL1/levy/mRpL51/ATPsynO/mRpS5/mRpL20/ND-42/ND-B22/ND-B17.2/SdhB/mRpL16/Pdhb/mRpL28/ND-23/muc/mRpL52/Chchd3/ATPsynE/ND-B17/ND-13B/Pdha…
GO:CC	mitochondrial membrane	GO:0031966	97/824	294/12100	5.72957e-42	9.65778e-40	6.82686e-40	Cyt-c1/GC1/ND-30/blw/COX4/ATPsynF/QIL1/ATPsynbeta/ATPsynC/COX5A/SdhD/ATPsynD/Coa8/Sfxn2/ND-B14.7/ATPsyngamma/SdhC/ND-B14.5B/ND-18/Marf/ND-49/ND-19/ND-20/Coq9/Mpcp2/SdhA/Hsp60A/ND-75/COX5B/Cisd2/RFeSP/CG9399/sun/ND-ACP/ND-39/UQCR-Q/ND-B14.5A/ND-MWFE/porin/ATPsynCF6/levy/mfrn/ATPsynO/ND-42/ND-B22/ND-B17.2/SdhB/Trap1/ND-23/Chchd3/COX7A/ATPsynE/ND-B17/CG5532/ND-13B/Ucp4A/ND-B18/ND-15/Hsc70-5/ND-SGDH/…
GO:CC	mitochondrial envelope	GO:0005740	101/824	319/12100	7.04948e-42	9.65778e-40	6.82686e-40	Cyt-c1/GC1/ND-30/blw/COX4/ATPsynF/QIL1/ATPsynbeta/ATPsynC/COX5A/SdhD/ATPsynD/Coa8/Sfxn2/ND-B14.7/ATPsyngamma/SdhC/ND-B14.5B/ND-18/Marf/ND-49/ND-19/ND-20/Coq9/Mpcp2/SdhA/Hsp60A/ND-75/COX5B/Cisd2/RFeSP/CG9399/sun/ND-ACP/ND-39/UQCR-Q/ND-B14.5A/ND-MWFE/porin/ATPsynCF6/levy/mfrn/ATPsynO/ND-42/ND-B22/ND-B17.2/SdhB/Trap1/Cyt-c-p/ND-23/Chchd3/COX7A/ATPsynE/ND-B17/CG5532/ND-13B/Ucp4A/ND-B18/ND-15/Hsc70-5/…
GO:CC	organelle inner membrane	GO:0019866	83/824	243/12100	3.26258e-37	3.26939e-35	2.31105e-35	Cyt-c1/GC1/ND-30/blw/COX4/ATPsynF/QIL1/ATPsynbeta/ATPsynC/COX5A/SdhD/ATPsynD/Sfxn2/ND-B14.7/ATPsyngamma/SdhC/ND-B14.5B/ND-18/ND-49/ND-19/ND-20/Coq9/Mpcp2/SdhA/Hsp60A/ND-75/COX5B/RFeSP/CG9399/sun/ND-ACP/ND-39/UQCR-Q/ND-B14.5A/ND-MWFE/ATPsynCF6/levy/mfrn/ATPsynO/ND-42/ND-B22/ND-B17.2/SdhB/Trap1/ND-23/Chchd3/COX7A/ATPsynE/ND-B17/ND-13B/ND-B18/ND-15/Hsc70-5/ND-SGDH/UQCR-C2/COX6B/ND-51/CG7382/Gpo1/ND-…
GO:CC	mitochondrial inner membrane	GO:0005743	81/824	232/12100	3.97736e-37	3.26939e-35	2.31105e-35	Cyt-c1/GC1/ND-30/blw/COX4/ATPsynF/QIL1/ATPsynbeta/ATPsynC/COX5A/SdhD/ATPsynD/Sfxn2/ND-B14.7/ATPsyngamma/SdhC/ND-B14.5B/ND-18/ND-49/ND-19/ND-20/Coq9/Mpcp2/SdhA/Hsp60A/ND-75/COX5B/RFeSP/CG9399/sun/ND-ACP/ND-39/UQCR-Q/ND-B14.5A/ND-MWFE/ATPsynCF6/levy/mfrn/ATPsynO/ND-42/ND-B22/ND-B17.2/SdhB/Trap1/ND-23/Chchd3/COX7A/ATPsynE/ND-B17/ND-13B/ND-B18/ND-15/Hsc70-5/ND-SGDH/UQCR-C2/COX6B/ND-51/CG7382/Gpo1/ND-…
GO:CC	organelle envelope	GO:0031967	113/824	446/12100	1.83218e-36	1.07575e-34	7.60423e-35	Cyt-c1/GC1/ND-30/blw/COX4/ATPsynF/QIL1/ATPsynbeta/ATPsynC/COX5A/SdhD/ATPsynD/Coa8/Sfxn2/ND-B14.7/ATPsyngamma/SdhC/ND-B14.5B/ND-18/Marf/ND-49/ND-19/ND-20/Coq9/Mpcp2/SdhA/Hsp60A/ND-75/COX5B/Cisd2/RFeSP/CG9399/sun/ND-ACP/ND-39/UQCR-Q/ND-B14.5A/ND-MWFE/porin/ATPsynCF6/levy/mfrn/ATPsynO/ND-42/ND-B22/ND-B17.2/SdhB/Trap1/Cyt-c-p/ND-23/Chchd3/COX7A/ATPsynE/ND-B17/TER94/Msp300/CG5532/ND-13B/Ucp4A/nudE/Dli…
GO:CC	envelope	GO:0031975	113/824	446/12100	1.83218e-36	1.07575e-34	7.60423e-35	Cyt-c1/GC1/ND-30/blw/COX4/ATPsynF/QIL1/ATPsynbeta/ATPsynC/COX5A/SdhD/ATPsynD/Coa8/Sfxn2/ND-B14.7/ATPsyngamma/SdhC/ND-B14.5B/ND-18/Marf/ND-49/ND-19/ND-20/Coq9/Mpcp2/SdhA/Hsp60A/ND-75/COX5B/Cisd2/RFeSP/CG9399/sun/ND-ACP/ND-39/UQCR-Q/ND-B14.5A/ND-MWFE/porin/ATPsynCF6/levy/mfrn/ATPsynO/ND-42/ND-B22/ND-B17.2/SdhB/Trap1/Cyt-c-p/ND-23/Chchd3/COX7A/ATPsynE/ND-B17/TER94/Msp300/CG5532/ND-13B/Ucp4A/nudE/Dli…
GO:CC	inner mitochondrial membrane protein complex	GO:0098800	61/824	143/12100	6.35186e-34	3.26327e-32	2.30673e-32	Cyt-c1/ND-30/blw/COX4/ATPsynF/QIL1/ATPsynbeta/ATPsynC/COX5A/SdhD/ATPsynD/ND-B14.7/ATPsyngamma/SdhC/ND-B14.5B/ND-18/ND-49/ND-19/ND-20/SdhA/ND-75/COX5B/RFeSP/sun/ND-ACP/ND-39/UQCR-Q/ND-B14.5A/ND-MWFE/ATPsynCF6/levy/ATPsynO/ND-42/ND-B22/ND-B17.2/SdhB/ND-23/Chchd3/ATPsynE/ND-B17/ND-13B/ND-B18/ND-15/Hsc70-5/ND-SGDH/UQCR-C2/COX6B/ND-51/CG7382/ND-B14/ND-24/Mitofilin/ND-PDSW/ATPsyndelta/Roe1/ND-ASHI/ATPs…
GO:CC	respirasome	GO:0070469	44/824	84/12100	1.7079e-29	7.79941e-28	5.51322e-28	Cyt-c1/ND-30/COX4/COX5A/SdhD/ND-B14.7/SdhC/ND-B14.5B/ND-18/ND-49/ND-19/ND-20/SdhA/ND-75/COX5B/RFeSP/ND-ACP/ND-39/UQCR-Q/ND-B14.5A/ND-MWFE/levy/ND-42/ND-B22/ND-B17.2/SdhB/ND-23/COX7A/ND-B17/ND-13B/ND-B18/ND-15/ND-SGDH/UQCR-C2/COX6B/ND-51/ND-B14/ND-24/COX8/ND-PDSW/ND-ASHI/COX7C/ND-B16.6/ND-B12
GO:CC	respiratory chain complex	GO:0098803	43/824	81/12100	3.60244e-29	1.4806e-27	1.0466e-27	Cyt-c1/ND-30/COX4/COX5A/SdhD/ND-B14.7/SdhC/ND-B14.5B/ND-18/ND-49/ND-19/ND-20/SdhA/ND-75/COX5B/RFeSP/ND-ACP/ND-39/UQCR-Q/ND-B14.5A/ND-MWFE/levy/ND-42/ND-B22/ND-B17.2/SdhB/ND-23/ND-B17/ND-13B/ND-B18/ND-15/ND-SGDH/UQCR-C2/COX6B/ND-51/ND-B14/ND-24/COX8/ND-PDSW/ND-ASHI/COX7C/ND-B16.6/ND-B12
GO:CC	mitochondrial respirasome	GO:0005746	43/824	82/12100	7.09407e-29	2.6506e-27	1.87365e-27	Cyt-c1/ND-30/COX4/COX5A/SdhD/ND-B14.7/SdhC/ND-B14.5B/ND-18/ND-49/ND-19/ND-20/SdhA/ND-75/COX5B/RFeSP/ND-ACP/ND-39/UQCR-Q/ND-B14.5A/ND-MWFE/levy/ND-42/ND-B22/ND-B17.2/SdhB/ND-23/COX7A/ND-B17/ND-13B/ND-B18/ND-15/ND-SGDH/UQCR-C2/COX6B/ND-51/ND-B14/ND-24/ND-PDSW/ND-ASHI/COX7C/ND-B16.6/ND-B12
GO:CC	oxidoreductase complex	GO:1990204	43/824	90/12100	1.03533e-26	3.54599e-25	2.50658e-25	Cyt-c1/ND-30/CG5214/SdhD/ND-B14.7/SdhC/ND-B14.5B/ND-18/ND-49/ND-19/ND-20/SdhA/ND-75/RFeSP/ND-ACP/ND-39/UQCR-Q/CG7430/ND-B14.5A/ND-MWFE/ND-42/ND-B22/ND-B17.2/SdhB/Pdhb/ND-23/muc/ND-B17/ND-13B/Pdha/ND-B18/ND-15/ND-SGDH/UQCR-C2/ND-51/Gpo1/ND-B14/ND-24/ND-PDSW/Gpdh1/ND-ASHI/ND-B16.6/ND-B12
GO:CC	mitochondrial matrix	GO:0005759	51/824	150/12100	4.40864e-23	1.39381e-21	9.8525e-22	IscU/P5CDh1/P32/Sod2/mRpL45/mRpS33/mRpS23/Hsp60A/mRpL35/mRpL27/mRpS30/mRpL24/CG7430/mRpL1/kdn/mRpL51/mRpS5/mRpL20/Trap1/mRpL16/Pdhb/mRpL28/muc/mRpL52/Idh3b/CG11267/Lon/Pdha/mRpS2/Hsc70-5/CG6094/CG7488/Adk3/mRpL19/mRpL50/mRpL15/mRpL37/mRpS18B/mRpL3/Roe1/mRpS11/POLDIP2/mEFTs/mRpL4/mRpS35/MetRS-m/sra/mRpS22/cav/CG4619/TrpRS-m
GO:CC	mitochondrial respiratory chain complex I	GO:0005747	28/824	50/12100	2.88242e-20	7.40422e-19	5.23387e-19	ND-30/ND-B14.7/ND-B14.5B/ND-18/ND-49/ND-19/ND-20/ND-75/ND-ACP/ND-39/ND-B14.5A/ND-MWFE/ND-42/ND-B22/ND-B17.2/ND-23/ND-B17/ND-13B/ND-B18/ND-15/ND-SGDH/ND-51/ND-B14/ND-24/ND-PDSW/ND-ASHI/ND-B16.6/ND-B12
GO:CC	NADH dehydrogenase complex	GO:0030964	28/824	50/12100	2.88242e-20	7.40422e-19	5.23387e-19	ND-30/ND-B14.7/ND-B14.5B/ND-18/ND-49/ND-19/ND-20/ND-75/ND-ACP/ND-39/ND-B14.5A/ND-MWFE/ND-42/ND-B22/ND-B17.2/ND-23/ND-B17/ND-13B/ND-B18/ND-15/ND-SGDH/ND-51/ND-B14/ND-24/ND-PDSW/ND-ASHI/ND-B16.6/ND-B12
GO:CC	respiratory chain complex I	GO:0045271	28/824	50/12100	2.88242e-20	7.40422e-19	5.23387e-19	ND-30/ND-B14.7/ND-B14.5B/ND-18/ND-49/ND-19/ND-20/ND-75/ND-ACP/ND-39/ND-B14.5A/ND-MWFE/ND-42/ND-B22/ND-B17.2/ND-23/ND-B17/ND-13B/ND-B18/ND-15/ND-SGDH/ND-51/ND-B14/ND-24/ND-PDSW/ND-ASHI/ND-B16.6/ND-B12
GO:CC	transmembrane transporter complex	GO:1902495	40/824	143/12100	4.76345e-15	1.15163e-13	8.14064e-14	Cyt-c1/Atpalpha/ND-30/nrv3/ND-B14.7/ND-B14.5B/ND-18/ND-49/ND-19/Hk/ND-20/ND-75/RFeSP/ND-ACP/ND-39/UQCR-Q/ND-B14.5A/ND-MWFE/ND-42/ND-B22/Nmdar1/ND-B17.2/ND-23/ND-B17/ND-13B/ND-B18/ND-15/ND-SGDH/UQCR-C2/ND-51/ND-B14/ND-24/ND-PDSW/ND-ASHI/sei/nAChRalpha2/ND-B16.6/ND-B12/eag/CG1824
GO:CC	transporter complex	GO:1990351	40/824	154/12100	7.21233e-14	1.64682e-12	1.1641e-12	Cyt-c1/Atpalpha/ND-30/nrv3/ND-B14.7/ND-B14.5B/ND-18/ND-49/ND-19/Hk/ND-20/ND-75/RFeSP/ND-ACP/ND-39/UQCR-Q/ND-B14.5A/ND-MWFE/ND-42/ND-B22/Nmdar1/ND-B17.2/ND-23/ND-B17/ND-13B/ND-B18/ND-15/ND-SGDH/UQCR-C2/ND-51/ND-B14/ND-24/ND-PDSW/ND-ASHI/sei/nAChRalpha2/ND-B16.6/ND-B12/eag/CG1824
GO:CC	organellar ribosome	GO:0000313	27/824	80/12100	9.86012e-13	2.02625e-11	1.43231e-11	mRpL45/mRpS33/mRpS23/mRpL35/mRpL27/mRpS30/mRpL24/mRpL1/mRpL51/mRpS5/mRpL20/mRpL16/mRpL28/mRpL52/mRpS2/CG6094/mRpL19/mRpL50/mRpL15/mRpL37/mRpS18B/mRpL3/mRpS11/mRpL4/mRpS35/mRpS22/cav
GO:CC	mitochondrial ribosome	GO:0005761	27/824	80/12100	9.86012e-13	2.02625e-11	1.43231e-11	mRpL45/mRpS33/mRpS23/mRpL35/mRpL27/mRpS30/mRpL24/mRpL1/mRpL51/mRpS5/mRpL20/mRpL16/mRpL28/mRpL52/mRpS2/CG6094/mRpL19/mRpL50/mRpL15/mRpL37/mRpS18B/mRpL3/mRpS11/mRpL4/mRpS35/mRpS22/cav
GO:CC	bounding membrane of organelle	GO:0098588	61/824	360/12100	2.2222e-11	4.34916e-10	3.07432e-10	Marf/alphaSnap/Vha26/Cisd2/GlcAT-S/Vps28/CG14015/Mgat2/gammaSnap2/Fmr1/porin/CG7011/deltaCOP/CG14767/TER94/TSG101/Msp300/CG9132/Vha68-1/Qsox1/VhaSFD/CG5946/Vps4/Arl8/CG9393/AP-1sigma/SPoCk/Tom7/Vha36-1/Tom40/SrpRalpha/Miro/CG5510/CG14182/nmd/ArfGAP1/spoon/CG5676/Rilpl/Vha55/Syx5/Tom70/Vps29/Vha44/Snx3/BORCS5/SppL/shrb/Efa6/betaCOP/Snx21/Hmt-1/CG7990/Mctp/Pex19/alpha-Man-IIa/Sara/VhaAC39-1/Syngr/S…
GO:CC	mitochondrial proton-transporting ATP synthase complex	GO:0005753	13/824	24/12100	7.63322e-10	1.36402e-08	9.64196e-09	blw/ATPsynF/ATPsynbeta/ATPsynC/ATPsynD/ATPsyngamma/sun/ATPsynCF6/ATPsynO/ATPsynE/ATPsyndelta/ATPsynG/Neb-cGP
GO:CC	proton-transporting ATP synthase complex	GO:0045259	13/824	24/12100	7.63322e-10	1.36402e-08	9.64196e-09	blw/ATPsynF/ATPsynbeta/ATPsynC/ATPsynD/ATPsyngamma/sun/ATPsynCF6/ATPsynO/ATPsynE/ATPsyndelta/ATPsynG/Neb-cGP
GO:CC	proton-transporting two-sector ATPase complex	GO:0016469	20/824	59/12100	8.08689e-10	1.38488e-08	9.78939e-09	blw/ATPsynF/ATPsynbeta/ATPsynC/ATPsynD/ATPsyngamma/Vha26/sun/ATPsynCF6/ATPsynO/ATPsynE/Vha68-1/VhaSFD/ATPsyndelta/Vha36-1/ATPsynG/Vha55/Neb-cGP/Vha44/VhaAC39-1
GO:CC	proton-transporting two-sector ATPase complex, catalytic domain	GO:0033178	12/824	21/12100	1.52581e-09	2.50843e-08	1.77315e-08	blw/ATPsynbeta/ATPsyngamma/Vha26/sun/ATPsynO/Vha68-1/VhaSFD/ATPsyndelta/Vha36-1/Vha55/Vha44
GO:CC	organellar large ribosomal subunit	GO:0000315	18/824	50/12100	1.87012e-09	2.84673e-08	2.01229e-08	mRpL45/mRpL35/mRpL27/mRpS30/mRpL24/mRpL1/mRpL51/mRpL20/mRpL16/mRpL28/mRpL52/CG6094/mRpL19/mRpL50/mRpL15/mRpL37/mRpL3/mRpL4
GO:CC	mitochondrial large ribosomal subunit	GO:0005762	18/824	50/12100	1.87012e-09	2.84673e-08	2.01229e-08	mRpL45/mRpL35/mRpL27/mRpS30/mRpL24/mRpL1/mRpL51/mRpL20/mRpL16/mRpL28/mRpL52/CG6094/mRpL19/mRpL50/mRpL15/mRpL37/mRpL3/mRpL4
GO:CC	synapse	GO:0045202	49/824	306/12100	1.4961e-08	2.19606e-07	1.55234e-07	shi/comt/alphaSnap/Ten-m/futsch/Syt4/Fmr1/Dap160/Nmdar1/RtGEF/sif/stau/sgg/Nmnat/RabX1/Arl8/Nlg4/alpha-Spec/stj/PsGEF/Csp/Eps-15/eIF4E1/Vap33/Rop/Snap25/beta-Spec/nAChRbeta1/Synj/BORCS5/inaE/Nrx-IV/nAChRalpha2/Gycbeta100B/bchs/Rab3-GAP/X11Lbeta/Mctp/EndoA/drpr/Vps35/Syngr/Syp/hts/cin/na/Syx18/nSyb/Syt1
GO:CC	cell junction	GO:0030054	63/824	446/12100	2.00016e-08	2.83471e-07	2.00379e-07	Atpalpha/shi/comt/alphaSnap/Ten-m/futsch/Syt4/Arf51F/Fmr1/Dap160/Nmdar1/RtGEF/sif/wun/stau/sgg/Nmnat/RabX1/Arl8/Sec5/shakB/Nlg4/alpha-Spec/mew/stj/PsGEF/Swip-1/Csp/Eps-15/arm/eIF4E1/Vap33/Rop/Snap25/beta-Spec/nAChRbeta1/Synj/BORCS5/inaE/Nrx-IV/nAChRalpha2/Efa6/Gycbeta100B/cpa/bchs/Rab3-GAP/X11Lbeta/Mctp/EndoA/drpr/Vps35/Syngr/ArfGAP3/Syp/hts/cin/na/vari/Syx18/LRR/nSyb/Lac/Syt1
GO:CC	vesicle	GO:0031982	66/824	488/12100	5.06583e-08	6.94019e-07	4.90586e-07	comt/alphaSnap/LpR2/Syt4/Vps28/Arf51F/TBC1D16/LpR1/CG7011/Dap160/Trap1/deltaCOP/TSG101/ALiX/CG10353/CG9132/CG18659/CG5946/RN-tre/aux/Ack/Vps4/RabX1/Stam/Sec5/Lkb1/CG2224/AP-1sigma/PsGEF/CG1902/Csp/Eps-15/arm/CG5510/milt/Vap33/Vha55/Rop/Khc-73/Synj/Vps29/Snx3/BORCS5/Hip1/CG2915/SppL/AMPKalpha/shrb/betaCOP/Hrs/Snx21/Rab3-GAP/Snx17/Mctp/Sara/VhaAC39-1/Vps35/Syngr/CG6218/spri/nSyb/Rabex-5/Leash/Trs31…
GO:CC	A band	GO:0031672	10/824	20/12100	2.00509e-07	2.65835e-06	1.87913e-06	mbl/Gapdh1/Ald1/Tpi/bsf/Pgk/Pglym78/robo3/Gpdh1/tmod
GO:CC	cytochrome complex	GO:0070069	11/824	25/12100	2.51577e-07	3.2312e-06	2.28406e-06	Cyt-c1/COX4/COX5A/COX5B/RFeSP/UQCR-Q/levy/UQCR-C2/COX6B/COX8/COX7C
GO:CC	cytoplasmic vesicle	GO:0031410	59/824	443/12100	4.52037e-07	5.46433e-06	3.86261e-06	comt/alphaSnap/LpR2/Syt4/Vps28/Arf51F/TBC1D16/LpR1/CG7011/Dap160/deltaCOP/TSG101/ALiX/CG9132/CG18659/CG5946/Ack/Vps4/RabX1/Stam/Sec5/Lkb1/CG2224/AP-1sigma/PsGEF/CG1902/Csp/Eps-15/arm/CG5510/milt/Vap33/Vha55/Rop/Khc-73/Vps29/Snx3/BORCS5/Hip1/SppL/AMPKalpha/shrb/betaCOP/Hrs/Snx21/Rab3-GAP/Snx17/Mctp/Sara/VhaAC39-1/Vps35/Syngr/spri/nSyb/Rabex-5/Leash/Trs31/Syt1/apolpp
GO:CC	intracellular vesicle	GO:0097708	59/824	443/12100	4.52037e-07	5.46433e-06	3.86261e-06	comt/alphaSnap/LpR2/Syt4/Vps28/Arf51F/TBC1D16/LpR1/CG7011/Dap160/deltaCOP/TSG101/ALiX/CG9132/CG18659/CG5946/Ack/Vps4/RabX1/Stam/Sec5/Lkb1/CG2224/AP-1sigma/PsGEF/CG1902/Csp/Eps-15/arm/CG5510/milt/Vap33/Vha55/Rop/Khc-73/Vps29/Snx3/BORCS5/Hip1/SppL/AMPKalpha/shrb/betaCOP/Hrs/Snx21/Rab3-GAP/Snx17/Mctp/Sara/VhaAC39-1/Vps35/Syngr/spri/nSyb/Rabex-5/Leash/Trs31/Syt1/apolpp
GO:CC	M band	GO:0031430	8/824	14/12100	9.28984e-07	1.09089e-05	7.71126e-06	Gapdh1/Ald1/Tpi/Pgk/Pglym78/robo3/Gpdh1/tmod
GO:CC	axon	GO:0030424	37/824	237/12100	1.66201e-06	1.89746e-05	1.34127e-05	comt/alphaSnap/futsch/Syt4/Fmr1/Khc/hdc/nudE/stau/Sac1/sgg/robo3/Arl8/PsGEF/Csp/arm/Rop/Snap25/beta-Spec/Imp/Synj/Efa6/CG6805/CG13506/fry/Cont/gek/EndoA/drpr/Vps35/na/Aplip1/Nak/nSyb/Ptp4E/Syt1/tutl
GO:CC	neuron projection	GO:0043005	57/824	453/12100	4.37937e-06	4.86465e-05	3.43871e-05	comt/alphaSnap/futsch/Syt4/Fmr1/Khc/Nmdar1/hdc/nudE/dpr11/stau/Sac1/sgg/robo3/Arl8/dpr1/PsGEF/Csp/arm/DIP-gamma/eIF4E1/dpr3/Rop/Snap25/beta-Spec/Imp/CG33543/nAChRbeta1/Synj/nAChRalpha2/shrb/Efa6/CG6805/CG13506/fry/Cont/DIP-theta/X11Lbeta/LRP1/gek/EndoA/5-HT7/drpr/SK/Kif3C/Vps35/DIP-zeta/cin/na/Aplip1/Nak/nSyb/Lac/Ptp4E/dpr19/Syt1/tutl
GO:CC	ribosomal subunit	GO:0044391	29/824	174/12100	5.98873e-06	6.47728e-05	4.57864e-05	mRpL45/mRpS33/mRpS23/mRpL35/mRpL27/mRpS30/mRpL24/mRpL1/mRpL51/mRpS5/mRpL20/mRpL16/mRpL28/mRpL52/mRpS2/CG6094/mRpL19/mRpL50/mRpL15/mRpL37/mRpS18B/mRpL3/mRpS11/mRpL4/mRpS35/mRpS22/cav/CG7414/RpLP0-like
GO:CC	mitochondrial proton-transporting ATP synthase complex, coupling factor F(o)	GO:0000276	7/824	14/12100	1.48762e-05	0.000149125	0.000105413	ATPsynF/ATPsynC/ATPsynD/ATPsynCF6/ATPsynO/ATPsynE/ATPsynG
GO:CC	proton-transporting ATP synthase complex, coupling factor F(o)	GO:0045263	7/824	14/12100	1.48762e-05	0.000149125	0.000105413	ATPsynF/ATPsynC/ATPsynD/ATPsynCF6/ATPsynO/ATPsynE/ATPsynG
GO:CC	respiratory chain complex IV	GO:0045277	7/824	14/12100	1.48762e-05	0.000149125	0.000105413	COX4/COX5A/COX5B/levy/COX6B/COX8/COX7C
GO:CC	organellar small ribosomal subunit	GO:0000314	10/824	30/12100	1.74212e-05	0.000166514	0.000117705	mRpS33/mRpS23/mRpS30/mRpS5/mRpS2/mRpS18B/mRpS11/mRpS35/mRpS22/cav
GO:CC	mitochondrial small ribosomal subunit	GO:0005763	10/824	30/12100	1.74212e-05	0.000166514	0.000117705	mRpS33/mRpS23/mRpS30/mRpS5/mRpS2/mRpS18B/mRpS11/mRpS35/mRpS22/cav
GO:CC	mitochondrial respiratory chain complex IV	GO:0005751	6/824	12/12100	6.33881e-05	0.000592102	0.000418543	COX4/COX5A/COX5B/levy/COX6B/COX7C
GO:CC	large ribosomal subunit	GO:0015934	19/824	105/12100	7.59806e-05	0.000693956	0.000490542	mRpL45/mRpL35/mRpL27/mRpS30/mRpL24/mRpL1/mRpL51/mRpL20/mRpL16/mRpL28/mRpL52/CG6094/mRpL19/mRpL50/mRpL15/mRpL37/mRpL3/mRpL4/RpLP0-like
GO:CC	presynapse	GO:0098793	26/824	170/12100	8.15096e-05	0.000728271	0.000514797	comt/alphaSnap/Syt4/Dap160/stau/Nmnat/Arl8/stj/Csp/Eps-15/Vap33/Rop/Snap25/Synj/BORCS5/Nrx-IV/Gycbeta100B/bchs/Rab3-GAP/Mctp/EndoA/Vps35/Syngr/na/nSyb/Syt1
GO:CC	proton-transporting V-type ATPase, V1 domain	GO:0033180	6/824	13/12100	0.000110947	0.000970196	0.000685809	Vha26/Vha68-1/VhaSFD/Vha36-1/Vha55/Vha44
GO:CC	postsynapse	GO:0098794	15/824	74/12100	0.000113968	0.000975848	0.000689804	Ten-m/Syt4/Fmr1/Nmdar1/RtGEF/Nlg4/eIF4E1/nAChRbeta1/inaE/nAChRalpha2/X11Lbeta/drpr/Syp/hts/cin
GO:CC	intrinsic component of mitochondrial membrane	GO:0098573	13/824	59/12100	0.000132913	0.00109862	0.000776589	QIL1/Sfxn2/Marf/Mpcp2/CG9399/Chchd3/Mitofilin/Miro/CG5676/OXA1L/CG4942/Tpc1/CG3156
GO:CC	vacuolar membrane	GO:0005774	15/824	75/12100	0.000133652	0.00109862	0.000776589	alphaSnap/Vha26/gammaSnap2/CG14767/TER94/Vha68-1/VhaSFD/Arl8/Vha36-1/Rilpl/Vha55/Vha44/BORCS5/Hmt-1/VhaAC39-1
GO:CC	outer membrane	GO:0019867	12/824	52/12100	0.000149939	0.00118509	0.000837715	Marf/Cisd2/porin/Msp300/CG9393/Tom7/Tom40/Miro/nmd/spoon/CG5676/Tom70
GO:CC	organelle outer membrane	GO:0031968	12/824	52/12100	0.000149939	0.00118509	0.000837715	Marf/Cisd2/porin/Msp300/CG9393/Tom7/Tom40/Miro/nmd/spoon/CG5676/Tom70
GO:CC	Z disc	GO:0030018	11/824	45/12100	0.000162653	0.00126133	0.000891604	mbl/Gapdh1/Ald1/Tpi/bsf/Pgk/Msp300/Pglym78/Gpdh1/CG43707/cpa
GO:CC	I band	GO:0031674	11/824	46/12100	0.0002008	0.00152831	0.00108033	mbl/Gapdh1/Ald1/Tpi/bsf/Pgk/Msp300/Pglym78/Gpdh1/CG43707/cpa
GO:CC	integral component of mitochondrial membrane	GO:0032592	12/824	55/12100	0.000263896	0.00197202	0.00139398	QIL1/Sfxn2/Mpcp2/CG9399/Chchd3/Mitofilin/Miro/CG5676/OXA1L/CG4942/Tpc1/CG3156
GO:CC	mitochondrial outer membrane	GO:0005741	11/824	48/12100	0.000300102	0.00220253	0.00155692	Marf/Cisd2/porin/CG9393/Tom7/Tom40/Miro/nmd/spoon/CG5676/Tom70
GO:CC	sarcomere	GO:0030017	13/824	64/12100	0.000314445	0.00226731	0.00160271	mbl/Gapdh1/Ald1/Tpi/bsf/Pgk/Msp300/Pglym78/robo3/Gpdh1/tmod/CG43707/cpa
GO:CC	neuromuscular junction	GO:0031594	15/824	82/12100	0.00037401	0.00265031	0.00187344	comt/Ten-m/futsch/Syt4/RtGEF/sgg/Nmnat/alpha-Spec/eIF4E1/beta-Spec/bchs/Syngr/Syp/Syx18/Syt1
GO:CC	myofibril	GO:0030016	13/824	68/12100	0.000583318	0.00406345	0.00287236	mbl/Gapdh1/Ald1/Tpi/bsf/Pgk/Msp300/Pglym78/robo3/Gpdh1/tmod/CG43707/cpa
GO:CC	axon terminus	GO:0043679	13/824	72/12100	0.00102487	0.00702034	0.00496251	comt/alphaSnap/stau/Arl8/Csp/Rop/Snap25/Synj/EndoA/Vps35/na/nSyb/Syt1
GO:CC	proton-transporting two-sector ATPase complex, proton-transporting domain	GO:0033177	8/824	32/12100	0.00108281	0.00729567	0.00515714	ATPsynF/ATPsynC/ATPsynD/ATPsynCF6/ATPsynO/ATPsynE/ATPsynG/VhaAC39-1
GO:CC	contractile fiber	GO:0043292	13/824	73/12100	0.00117089	0.00763864	0.00539958	mbl/Gapdh1/Ald1/Tpi/bsf/Pgk/Msp300/Pglym78/robo3/Gpdh1/tmod/CG43707/cpa
GO:CC	neuron projection terminus	GO:0044306	13/824	73/12100	0.00117089	0.00763864	0.00539958	comt/alphaSnap/stau/Arl8/Csp/Rop/Snap25/Synj/EndoA/Vps35/na/nSyb/Syt1
GO:CC	plasma membrane protein complex	GO:0098797	22/824	160/12100	0.0012305	0.00790213	0.00558583	Atpalpha/nrv3/Fkbp59/Hk/Vha26/Nmdar1/VhaSFD/Sec5/mew/Vha36-1/Traf6/Ggamma1/Eps-15/arm/Syn1/Vha55/sei/Gbeta5/nAChRalpha2/VhaAC39-1/eag/GABA-B-R3
GO:CC	vacuole	GO:0005773	22/824	162/12100	0.00144968	0.00905194	0.00639861	alphaSnap/Vha26/gammaSnap2/Tsp42Ej/CG14767/TER94/Atg3/Vha68-1/VhaSFD/Arl8/zda/Vha36-1/CG8155/Rilpl/Vha55/Synj/Vha44/BORCS5/Hmt-1/bchs/Rab3-GAP/VhaAC39-1
GO:CC	supramolecular fiber	GO:0099512	26/824	204/12100	0.0014536	0.00905194	0.00639861	mbl/Gapdh1/shi/Ald1/Tpi/futsch/bsf/Pgk/Khc/Msp300/Pglym78/robo3/Tao/Gpdh1/pigs/Lam/tmod/CG43707/CG14535/Khc-73/alphaTub84D/CG42699/cpa/Drp1/Kif3C/Zw10
GO:CC	terminal bouton	GO:0043195	12/824	66/12100	0.00148545	0.00911221	0.00644121	comt/alphaSnap/stau/Arl8/Csp/Rop/Snap25/Synj/EndoA/Vps35/nSyb/Syt1
GO:CC	tricarboxylic acid cycle enzyme complex	GO:0045239	5/824	14/12100	0.00172506	0.0104265	0.00737022	CG5214/CG7430/Scsalpha1/Fum1/ScsbetaA
GO:CC	supramolecular polymer	GO:0099081	26/824	207/12100	0.00179384	0.010685	0.007553	mbl/Gapdh1/shi/Ald1/Tpi/futsch/bsf/Pgk/Khc/Msp300/Pglym78/robo3/Tao/Gpdh1/pigs/Lam/tmod/CG43707/CG14535/Khc-73/alphaTub84D/CG42699/cpa/Drp1/Kif3C/Zw10
GO:CC	integral component of mitochondrial inner membrane	GO:0031305	9/824	43/12100	0.00207929	0.0122084	0.00862983	QIL1/Sfxn2/Mpcp2/CG9399/Chchd3/Mitofilin/OXA1L/CG4942/Tpc1
GO:CC	vacuolar proton-transporting V-type ATPase complex	GO:0016471	7/824	28/12100	0.0022131	0.012811	0.00905582	Vha26/Vha68-1/VhaSFD/Vha36-1/Vha55/Vha44/VhaAC39-1
GO:CC	exocytic vesicle	GO:0070382	13/824	79/12100	0.00245746	0.014028	0.00991606	comt/Syt4/Dap160/PsGEF/Csp/Eps-15/Vap33/BORCS5/Rab3-GAP/Mctp/Syngr/nSyb/Syt1
GO:CC	supramolecular complex	GO:0099080	37/824	336/12100	0.00253456	0.0142699	0.0100871	mbl/Gapdh1/shi/Ald1/Mkrn1/Tpi/futsch/bsf/Pgk/Fmr1/Khc/PyK/TER94/Msp300/Pglym78/nudE/stau/robo3/Tao/Gpdh1/eIF4E1/pigs/Lam/tmod/CG43707/CG14535/Khc-73/alphaTub84D/CG42699/cpa/PAN2/Drp1/Kif3C/Pop2/CG4619/Syp/Zw10
GO:CC	Golgi apparatus	GO:0005794	41/824	384/12100	0.00270757	0.015038	0.01063	comt/GABPI/FucTA/FucT6/GlcAT-S/CG14015/Mgat2/Fmr1/CG7011/app/deltaCOP/CG42542/Qsox1/CG5946/aux/CG12121/CG7149/alpha-Spec/AP-1sigma/SPoCk/Fer1HCH/CG5510/CG14182/Ccm3/ArfGAP1/spoon/CG7272/Syx5/CG5934/SppL/Efa6/betaCOP/sotv/CG7990/Mppe/alpha-Man-IIa/CG7536/CG14971/Zw10/Trs31/GalT1
GO:CC	intrinsic component of mitochondrial inner membrane	GO:0031304	9/824	45/12100	0.00289204	0.0158484	0.0112028	QIL1/Sfxn2/Mpcp2/CG9399/Chchd3/Mitofilin/OXA1L/CG4942/Tpc1
GO:CC	Golgi membrane	GO:0000139	14/824	91/12100	0.00325215	0.0175873	0.012432	GlcAT-S/CG14015/Mgat2/Fmr1/CG7011/Qsox1/SPoCk/CG5510/ArfGAP1/Syx5/Efa6/CG7990/alpha-Man-IIa/GalT1
GO:CC	Golgi-associated vesicle membrane	GO:0030660	5/824	16/12100	0.00335757	0.0177998	0.0125823	deltaCOP/CG5946/AP-1sigma/SppL/betaCOP
GO:CC	presynaptic active zone	GO:0048786	7/824	30/12100	0.00337807	0.0177998	0.0125823	Nmnat/stj/Nrx-IV/Gycbeta100B/bchs/Vps35/nSyb
GO:CC	vesicle membrane	GO:0012506	19/824	142/12100	0.00350805	0.0182508	0.012901	Vps28/deltaCOP/TSG101/CG9132/CG5946/Vps4/AP-1sigma/Synj/Vps29/Snx3/BORCS5/SppL/shrb/betaCOP/Snx21/Mctp/Sara/Syngr/Syt1
GO:CC	early endosome	GO:0005769	12/824	73/12100	0.00358461	0.0184159	0.0130178	LpR2/Arf51F/TBC1D16/LpR1/Vha55/Khc-73/Snx3/Snx21/Snx17/Sara/VhaAC39-1/Vps35
GO:CC	synaptic vesicle	GO:0008021	12/824	74/12100	0.00402024	0.020399	0.0144196	comt/Syt4/Dap160/Csp/Eps-15/Vap33/BORCS5/Rab3-GAP/Mctp/Syngr/nSyb/Syt1
GO:CC	mitochondrial respiratory chain complex III	GO:0005750	4/824	11/12100	0.00478475	0.0234111	0.0165488	Cyt-c1/RFeSP/UQCR-Q/UQCR-C2
GO:CC	autolysosome	GO:0044754	4/824	11/12100	0.00478475	0.0234111	0.0165488	TER94/zda/Synj/Rab3-GAP
GO:CC	respiratory chain complex III	GO:0045275	4/824	11/12100	0.00478475	0.0234111	0.0165488	Cyt-c1/RFeSP/UQCR-Q/UQCR-C2
GO:CC	cytoplasmic vesicle membrane	GO:0030659	18/824	137/12100	0.0053637	0.0259351	0.0183329	Vps28/deltaCOP/TSG101/CG9132/CG5946/Vps4/AP-1sigma/Vps29/Snx3/BORCS5/SppL/shrb/betaCOP/Snx21/Mctp/Sara/Syngr/Syt1
GO:CC	intrinsic component of organelle membrane	GO:0031300	23/824	192/12100	0.00577022	0.0274521	0.0194053	QIL1/Sfxn2/Trp1/Marf/Mpcp2/CG9399/CG7011/Chchd3/Qsox1/Mitofilin/EMC6/Der-2/Miro/Xxylt/CG5676/OXA1L/CG1317/SppL/CG4942/Tpc1/alt/CG3156/Syt1
GO:CC	secretory vesicle	GO:0099503	14/824	97/12100	0.00584111	0.0274521	0.0194053	comt/Syt4/Dap160/PsGEF/Csp/Eps-15/Vap33/Rop/BORCS5/Rab3-GAP/Mctp/Syngr/nSyb/Syt1
GO:CC	lateral plasma membrane	GO:0016328	5/824	18/12100	0.00587783	0.0274521	0.0194053	alpha-Spec/mew/beta-Spec/hts/vari
GO:CC	distal axon	GO:0150034	14/824	98/12100	0.00640054	0.0295576	0.0208936	comt/alphaSnap/stau/Arl8/Csp/Rop/Snap25/Synj/gek/EndoA/Vps35/na/nSyb/Syt1
GO:CC	mitochondrial outer membrane translocase complex	GO:0005742	4/824	12/12100	0.00679446	0.0303535	0.0214562	CG9393/Tom7/Tom40/Tom70
GO:CC	secondary lysosome	GO:0005767	4/824	12/12100	0.00679446	0.0303535	0.0214562	TER94/zda/Synj/Rab3-GAP
GO:CC	potassium channel complex	GO:0034705	4/824	12/12100	0.00679446	0.0303535	0.0214562	Hk/sei/eag/CG1824
GO:CC	coated vesicle	GO:0030135	11/824	70/12100	0.00733477	0.032415	0.0229134	CG7011/deltaCOP/CG9132/CG18659/CG5946/Ack/Sec5/AP-1sigma/CG5510/Hip1/betaCOP
GO:CC	integral component of organelle membrane	GO:0031301	22/824	185/12100	0.00744246	0.032541	0.0230025	QIL1/Sfxn2/Trp1/Mpcp2/CG9399/CG7011/Chchd3/Qsox1/Mitofilin/EMC6/Der-2/Miro/Xxylt/CG5676/OXA1L/CG1317/SppL/CG4942/Tpc1/alt/CG3156/Syt1
GO:CC	plasma membrane proton-transporting V-type ATPase complex	GO:0033181	5/824	19/12100	0.00753727	0.0326086	0.0230503	Vha26/VhaSFD/Vha36-1/Vha55/VhaAC39-1
GO:CC	proton-transporting V-type ATPase complex	GO:0033176	7/824	35/12100	0.00829701	0.0351554	0.0248505	Vha26/Vha68-1/VhaSFD/Vha36-1/Vha55/Vha44/VhaAC39-1
GO:CC	fusome	GO:0045169	7/824	35/12100	0.00829701	0.0351554	0.0248505	TER94/alpha-Spec/Fer1HCH/tmod/beta-Spec/shrb/hts
GO:CC	small ribosomal subunit	GO:0015935	11/824	72/12100	0.00905796	0.0376973	0.0266473	mRpS33/mRpS23/mRpS30/mRpS5/mRpS2/mRpS18B/mRpS11/mRpS35/mRpS22/cav/CG7414
GO:CC	transport vesicle	GO:0030133	14/824	102/12100	0.00908036	0.0376973	0.0266473	comt/Syt4/Dap160/AP-1sigma/PsGEF/Csp/Eps-15/Vap33/BORCS5/Rab3-GAP/Mctp/Syngr/nSyb/Syt1
GO:CC	outer mitochondrial membrane protein complex	GO:0098799	4/824	13/12100	0.00929229	0.0381913	0.0269966	CG9393/Tom7/Tom40/Tom70
GO:CC	ESCRT complex	GO:0036452	5/824	20/12100	0.00949672	0.0386451	0.0273173	Vps28/TSG101/Vps4/Stam/shrb
GO:CC	SNARE complex	GO:0031201	6/824	29/12100	0.0120377	0.048505	0.034287	alphaSnap/gammaSnap2/Snap25/Syx5/Syx18/nSyb

## Sheet: Cluster 3
source	term_name	term_id	GeneRatio	BgRatio	pvalue	p.adjust	qvalue	geneID
GO:MF	structural constituent of ribosome	GO:0003735	27/329	271/12049	5.94293e-09	2.10974e-06	1.93927e-06	CG11700/mRpL23/RpL38/RpL15/RpL36/RpS5b/RpL37A/RpL39/RpS25/RpS26/RpS27A/mRpS9/RpS29/RpS30/mRpS7/bonsai/mRpS10/RpLP1/RpL10/mRpL54/RpS20/RpS10b/mRpL22/RpS15/RpS14a/RpL27A/RpL36A
GO:MF	ubiquitin-like protein ligase activity	GO:0061659	14/329	149/12049	5.68195e-05	0.0100855	0.00927055	Pli/Ubr1/CG13605/Prp19/cerv/CG7694/Cbl/CG5087/Su(dx)/mib2/CG3356/CG14435/Roc1a/ctrip
GO:MF	ubiquitin-like protein transferase activity	GO:0019787	16/329	198/12049	0.000105803	0.0120517	0.011078	Pli/Ubr1/CG13605/Prp19/cerv/CG7694/Cbl/CG5087/Su(dx)/mib2/CG3356/CG14435/Roc1a/ctrip/vih/UbcE2M
GO:MF	ubiquitin protein ligase activity	GO:0061630	13/329	142/12049	0.000135794	0.0120517	0.011078	Pli/Ubr1/CG13605/Prp19/CG7694/Cbl/CG5087/Su(dx)/mib2/CG3356/CG14435/Roc1a/ctrip
GO:MF	ubiquitin-protein transferase activity	GO:0004842	14/329	179/12049	0.00039616	0.0281274	0.0258547	Pli/Ubr1/CG13605/Prp19/CG7694/Cbl/CG5087/Su(dx)/mib2/CG3356/CG14435/Roc1a/ctrip/vih
GO:MF	heat shock protein binding	GO:0031072	6/329	39/12049	0.000603578	0.0357117	0.0328262	Hsp70Ba/CG3061/Hsp70Bbb/Hsp70Ab/p23/unc-45
GO:MF	single-stranded RNA binding	GO:0003727	6/329	41/12049	0.000794588	0.040297	0.037041	Sxl/Zn72D/Pep/AGO2/ssx/U2af50
GO:MF	ribonucleoprotein complex binding	GO:0043021	7/329	59/12049	0.00107026	0.0474926	0.0436551	l(3)80Fj/Der-1/LTV1/PQBP1/ecd/RpLP1/CG4957
GO:MF	misfolded protein binding	GO:0051787	4/329	18/12049	0.00123323	0.0486442	0.0447137	Hsp70Ba/Der-1/Hsp70Bbb/Hsp70Ab
GO:BP	cytoplasmic translation	GO:0002181	21/344	135/12175	1.78769e-10	3.57537e-07	3.13315e-07	Pink1/RpL38/RpL15/RpL36/RpS5b/RpL37A/RpL39/RpS25/RpS26/RpS27A/RpS29/RpS30/RpLP1/RpL10/RpS20/RpS10b/RpS15/eIF2beta/RpS14a/RpL27A/RpL36A
GO:BP	cellular protein catabolic process	GO:0044257	34/344	361/12175	6.50421e-10	6.50421e-07	5.69974e-07	CG11700/Pink1/Prosalpha4/CG7058/Ubr1/CG3061/Rpn9/Rpn10/EloB/DUBAI/Der-1/fzr/RpS27A/Cp1/SkpA/Rpn11/CG13605/Socs36E/CG4911/Fsn/phyl/Usp15-31/Cbl/CG5087/Su(dx)/Rpt4/wds/CG3356/Ubi-p63E/Roc1a/Faf2/ctrip/vih/Prosbeta4
GO:BP	protein catabolic process	GO:0030163	34/344	374/12175	1.64522e-09	9.50963e-07	8.33344e-07	CG11700/Pink1/Prosalpha4/CG7058/Ubr1/CG3061/Rpn9/Rpn10/EloB/DUBAI/Der-1/fzr/RpS27A/Cp1/SkpA/Rpn11/CG13605/Socs36E/CG4911/Fsn/phyl/Usp15-31/Cbl/CG5087/Su(dx)/Rpt4/wds/CG3356/Ubi-p63E/Roc1a/Faf2/ctrip/vih/Prosbeta4
GO:BP	proteolysis involved in cellular protein catabolic process	GO:0051603	33/344	357/12175	1.90193e-09	9.50963e-07	8.33344e-07	CG11700/Pink1/Prosalpha4/CG7058/Ubr1/CG3061/Rpn9/Rpn10/EloB/DUBAI/Der-1/fzr/RpS27A/Cp1/SkpA/Rpn11/CG13605/CG4911/Fsn/phyl/Usp15-31/Cbl/CG5087/Su(dx)/Rpt4/wds/CG3356/Ubi-p63E/Roc1a/Faf2/ctrip/vih/Prosbeta4
GO:BP	modification-dependent protein catabolic process	GO:0019941	31/344	333/12175	5.1084e-09	2.04336e-06	1.79063e-06	CG11700/Pink1/Prosalpha4/CG7058/Ubr1/CG3061/Rpn9/Rpn10/EloB/DUBAI/Der-1/fzr/RpS27A/SkpA/Rpn11/CG4911/Fsn/phyl/Usp15-31/Cbl/CG5087/Su(dx)/Rpt4/wds/CG3356/Ubi-p63E/Roc1a/Faf2/ctrip/vih/Prosbeta4
GO:BP	cellular macromolecule catabolic process	GO:0044265	39/344	499/12175	7.47321e-09	2.39661e-06	2.10019e-06	CG11700/Pink1/Prosalpha4/CG7058/Ubr1/CG3061/Rpn9/Rpn10/EloB/DUBAI/Der-1/fzr/RpS27A/Cp1/SkpA/Rga/Rpn11/RNaseX25/CG13605/Socs36E/CG4911/Fsn/phyl/Usp15-31/Cbl/CG5087/Su(dx)/Rpt4/wds/rump/CG3356/Ubi-p63E/Roc1a/Faf2/ctrip/Upf1/vih/LSm1/Prosbeta4
GO:BP	modification-dependent macromolecule catabolic process	GO:0043632	31/344	340/12175	8.38814e-09	2.39661e-06	2.10019e-06	CG11700/Pink1/Prosalpha4/CG7058/Ubr1/CG3061/Rpn9/Rpn10/EloB/DUBAI/Der-1/fzr/RpS27A/SkpA/Rpn11/CG4911/Fsn/phyl/Usp15-31/Cbl/CG5087/Su(dx)/Rpt4/wds/CG3356/Ubi-p63E/Roc1a/Faf2/ctrip/vih/Prosbeta4
GO:BP	protein modification by small protein conjugation	GO:0032446	25/344	247/12175	3.20699e-08	8.01748e-06	7.02584e-06	CG11700/Pli/Ubr1/fzr/CG9426/RpS27A/Cand1/Prp19/CG4911/cerv/CG7694/KLHL18/Cbl/wcy/CG5087/Su(dx)/mib2/CG3356/CG14435/Ubi-p63E/l(3)73Ah/Roc1a/ctrip/vih/UbcE2M
GO:BP	protein ubiquitination	GO:0016567	23/344	218/12175	5.37105e-08	1.11719e-05	9.79008e-06	CG11700/Pli/Ubr1/fzr/CG9426/RpS27A/Cand1/Prp19/CG4911/CG7694/KLHL18/Cbl/wcy/CG5087/Su(dx)/mib2/CG3356/CG14435/Ubi-p63E/l(3)73Ah/Roc1a/ctrip/vih
GO:BP	protein modification by small protein conjugation or removal	GO:0070647	28/344	310/12175	5.58593e-08	1.11719e-05	9.79008e-06	CG11700/Pli/Ubr1/DUBAI/fzr/CG9426/RpS27A/Cand1/Rpn11/Prp19/CG4911/cerv/CG7694/Usp15-31/KLHL18/Cbl/wcy/CG5087/Su(dx)/mib2/CG3356/CG14435/Ubi-p63E/l(3)73Ah/Roc1a/ctrip/vih/UbcE2M
GO:BP	regulation of catabolic process	GO:0009894	26/344	280/12175	9.7722e-08	1.77676e-05	1.55701e-05	Pink1/EloB/DUBAI/Rab21/fzr/AP-1-2beta/SkpA/Rga/CG4025/CG13605/Socs36E/Fsn/phyl/Dronc/wcy/BI-1/Atg18a/Su(dx)/wds/RagC-D/rump/Roc1a/ctrip/Upf1/vih/LSm1
GO:BP	ubiquitin-dependent protein catabolic process	GO:0006511	28/344	329/12175	1.95262e-07	3.25436e-05	2.85185e-05	Pink1/Prosalpha4/CG7058/Ubr1/CG3061/Rpn9/Rpn10/EloB/DUBAI/Der-1/fzr/SkpA/Rpn11/CG4911/Fsn/phyl/Usp15-31/Cbl/CG5087/Su(dx)/Rpt4/wds/CG3356/Roc1a/Faf2/ctrip/vih/Prosbeta4
GO:BP	regulation of cellular catabolic process	GO:0031329	23/344	255/12175	9.12591e-07	0.000140399	0.000123034	Pink1/EloB/DUBAI/Rab21/fzr/AP-1-2beta/SkpA/Rga/CG4025/CG13605/Socs36E/phyl/Dronc/wcy/BI-1/Atg18a/wds/RagC-D/rump/Roc1a/Upf1/vih/LSm1
GO:BP	positive regulation of protein catabolic process	GO:0045732	12/344	76/12175	1.30485e-06	0.00017704	0.000155143	EloB/fzr/SkpA/CG13605/Socs36E/Fsn/phyl/Su(dx)/wds/Roc1a/ctrip/vih
GO:BP	RNA splicing	GO:0008380	25/344	300/12175	1.3278e-06	0.00017704	0.000155143	CG8565/Sxl/HnRNP-K/Sf3b2/Zn72D/CG1965/Psi/CG42724/Sf3b5/Cbp20/Prp8/Pep/Rox8/PQBP1/Prp19/Ars2/ecd/ssx/SC35/U2af50/BI-1/B52/CG3198/CG7741/Rbp1
GO:BP	positive regulation of catabolic process	GO:0009896	18/344	170/12175	1.46987e-06	0.000183734	0.000161009	Pink1/EloB/Rab21/fzr/AP-1-2beta/SkpA/Rga/CG13605/Socs36E/Fsn/phyl/Su(dx)/wds/Roc1a/ctrip/Upf1/vih/LSm1
GO:BP	viral process	GO:0016032	9/344	41/12175	1.62954e-06	0.00019171	0.000167999	Mvl/EloB/Cbp20/AP-1-2beta/Arf102F/AGO2/Ars2/Rab2/Roc1a
GO:BP	regulation of protein catabolic process	GO:0042176	13/344	96/12175	2.83943e-06	0.000315492	0.000276471	EloB/DUBAI/fzr/SkpA/CG13605/Socs36E/Fsn/phyl/Su(dx)/wds/Roc1a/ctrip/vih
GO:BP	RNA splicing, via transesterification reactions	GO:0000375	23/344	278/12175	4.01231e-06	0.000382124	0.000334862	CG8565/Sxl/HnRNP-K/Sf3b2/Zn72D/CG1965/Psi/CG42724/Sf3b5/Cbp20/Prp8/Pep/Rox8/PQBP1/Prp19/Ars2/ecd/SC35/U2af50/B52/CG3198/CG7741/Rbp1
GO:BP	RNA splicing, via transesterification reactions with bulged adenosine as nucleophile	GO:0000377	23/344	278/12175	4.01231e-06	0.000382124	0.000334862	CG8565/Sxl/HnRNP-K/Sf3b2/Zn72D/CG1965/Psi/CG42724/Sf3b5/Cbp20/Prp8/Pep/Rox8/PQBP1/Prp19/Ars2/ecd/SC35/U2af50/B52/CG3198/CG7741/Rbp1
GO:BP	mRNA splicing, via spliceosome	GO:0000398	23/344	278/12175	4.01231e-06	0.000382124	0.000334862	CG8565/Sxl/HnRNP-K/Sf3b2/Zn72D/CG1965/Psi/CG42724/Sf3b5/Cbp20/Prp8/Pep/Rox8/PQBP1/Prp19/Ars2/ecd/SC35/U2af50/B52/CG3198/CG7741/Rbp1
GO:BP	proteasomal protein catabolic process	GO:0010498	22/344	263/12175	5.46181e-06	0.000486714	0.000426515	Prosalpha4/CG7058/Ubr1/CG3061/Rpn9/Rpn10/EloB/Der-1/fzr/SkpA/Rpn11/CG13605/CG4911/Fsn/phyl/Su(dx)/Rpt4/wds/Roc1a/Faf2/vih/Prosbeta4
GO:BP	intra-Golgi vesicle-mediated transport	GO:0006891	7/344	26/12175	5.59721e-06	0.000486714	0.000426515	gammaCOP/Vti1b/Rab6/SIDL/Vti1a/Cog7/Cog6
GO:BP	proteasome-mediated ubiquitin-dependent protein catabolic process	GO:0043161	21/344	247/12175	6.95646e-06	0.000579705	0.000508005	Prosalpha4/CG7058/Ubr1/CG3061/Rpn9/Rpn10/EloB/Der-1/fzr/SkpA/Rpn11/CG4911/Fsn/phyl/Su(dx)/Rpt4/wds/Roc1a/Faf2/vih/Prosbeta4
GO:BP	retrograde transport, endosome to Golgi	GO:0042147	7/344	31/12175	1.98097e-05	0.00158478	0.00138876	Vti1b/Vps26/Rab6/Vps50/SIDL/Vti1a/wash
GO:BP	regulation of mRNA metabolic process	GO:1903311	15/344	150/12175	2.20801e-05	0.00169847	0.0014884	CG8565/Sxl/HnRNP-K/Psi/Pep/Rga/Rox8/Prp19/SC35/U2af50/B52/rump/Rbp1/Upf1/LSm1
GO:BP	regulation of RNA splicing	GO:0043484	12/344	101/12175	2.66231e-05	0.00193811	0.0016984	Sxl/HnRNP-K/Psi/Pep/Rox8/Prp19/ssx/SC35/U2af50/BI-1/B52/Rbp1
GO:BP	positive regulation of cellular catabolic process	GO:0031331	15/344	153/12175	2.79338e-05	0.00193811	0.0016984	Pink1/EloB/Rab21/fzr/AP-1-2beta/SkpA/Rga/CG13605/Socs36E/phyl/wds/Roc1a/Upf1/vih/LSm1
GO:BP	mRNA metabolic process	GO:0016071	28/344	425/12175	2.81026e-05	0.00193811	0.0016984	CG8565/Sxl/HnRNP-K/Sf3b2/Zn72D/CG1965/Psi/CG42724/Sf3b5/Cpsf5/Cbp20/Prp8/Pep/Rga/Rox8/PQBP1/Prp19/Ars2/ecd/SC35/U2af50/B52/CG3198/rump/CG7741/Rbp1/Upf1/LSm1
GO:BP	mRNA processing	GO:0006397	24/344	338/12175	3.24387e-05	0.00216258	0.0018951	CG8565/Sxl/HnRNP-K/Sf3b2/Zn72D/CG1965/Psi/CG42724/Sf3b5/Cpsf5/Cbp20/Prp8/Pep/Rox8/PQBP1/Prp19/Ars2/ecd/SC35/U2af50/B52/CG3198/CG7741/Rbp1
GO:BP	positive regulation of cellular protein catabolic process	GO:1903364	9/344	59/12175	3.73451e-05	0.00240936	0.00211136	EloB/fzr/SkpA/CG13605/Socs36E/phyl/wds/Roc1a/vih
GO:BP	regulation of cellular protein catabolic process	GO:1903362	10/344	74/12175	4.09713e-05	0.00256071	0.00224399	EloB/DUBAI/fzr/SkpA/CG13605/Socs36E/phyl/wds/Roc1a/vih
GO:BP	protein refolding	GO:0042026	6/344	25/12175	5.4732e-05	0.00327584	0.00287067	Hsp26/Hsp70Ba/Hsp70Bbb/CG14207/Hsp70Ab/Hsp27
GO:BP	viral life cycle	GO:0019058	7/344	36/12175	5.56892e-05	0.00327584	0.00287067	Mvl/Cbp20/AP-1-2beta/Arf102F/AGO2/Ars2/Rab2
GO:BP	regulation of transcription initiation from RNA polymerase II promoter	GO:0060260	5/344	16/12175	5.90959e-05	0.00328311	0.00287704	Sec13/Dsp1/SC35/B52/Rpt4
GO:BP	regulation of DNA-templated transcription, initiation	GO:2000142	5/344	16/12175	5.90959e-05	0.00328311	0.00287704	Sec13/Dsp1/SC35/B52/Rpt4
GO:BP	cellular response to chemical stimulus	GO:0070887	29/344	468/12175	6.15959e-05	0.00332951	0.0029177	Dop1R1/Hsp70Ba/CG3061/uex/MsrA/sxc/Sec13/Der-1/Srlp/tkv/PICK1/Akap200/Eip93F/SkpA/Hsp70Bbb/Pi3K21B/Hsp70Ab/5-HT1A/poly/Atg18b/BI-1/lncRNA:let7C/RagC-D/Sirup/Roc1a/Nurf-38/Upf1/CG30054/5-HT1B
GO:BP	chaperone-mediated protein folding	GO:0061077	8/344	50/12175	7.13e-05	0.00375263	0.00328849	Hsp26/Hsp70Ba/CG3061/Hsp70Bbb/CG14207/Hsp70Ab/unc-45/Hsp27
GO:BP	cellular response to oxygen-containing compound	GO:1901701	16/344	192/12175	0.000109833	0.00563244	0.0049358	Dop1R1/uex/Sec13/PICK1/Akap200/SkpA/Pi3K21B/5-HT1A/poly/lncRNA:let7C/RagC-D/Sirup/Roc1a/Nurf-38/CG30054/5-HT1B
GO:BP	polytene chromosome puffing	GO:0035079	4/344	10/12175	0.000114929	0.00570629	0.00500051	Hsp70Ba/Sec13/Hsp70Bbb/Hsp70Ab
GO:BP	regulation of mRNA processing	GO:0050684	11/344	100/12175	0.000116979	0.00570629	0.00500051	CG8565/Sxl/HnRNP-K/Psi/Pep/Rox8/Prp19/SC35/U2af50/B52/Rbp1
GO:BP	regulation of cell adhesion	GO:0030155	8/344	54/12175	0.000125252	0.00596436	0.00522666	baz/disco-r/tkv/wech/PlexB/stck/Sec23/wash
GO:BP	alternative mRNA splicing, via spliceosome	GO:0000380	10/344	86/12175	0.000149647	0.00696032	0.00609944	Sxl/HnRNP-K/Psi/Rox8/PQBP1/Prp19/SC35/U2af50/B52/Rbp1
GO:BP	cellular response to organic cyclic compound	GO:0071407	7/344	43/12175	0.000181408	0.0082458	0.00722592	Dop1R1/Sec13/5-HT1A/lncRNA:let7C/Nurf-38/CG30054/5-HT1B
GO:BP	ribonucleoprotein complex assembly	GO:0022618	12/344	124/12175	0.000199039	0.00867028	0.0075979	CG8565/RpL38/RpS5b/Prp8/mRpS7/Prp19/AGO2/RpL10/RpS15/CG3198/eIF2beta/RpS14a
GO:BP	regulation of mRNA splicing, via spliceosome	GO:0048024	10/344	89/12175	0.000199416	0.00867028	0.0075979	Sxl/HnRNP-K/Psi/Pep/Rox8/Prp19/SC35/U2af50/B52/Rbp1
GO:BP	ribonucleoprotein complex subunit organization	GO:0071826	12/344	127/12175	0.000249186	0.0106037	0.00929216	CG8565/RpL38/RpS5b/Prp8/mRpS7/Prp19/AGO2/RpL10/RpS15/CG3198/eIF2beta/RpS14a
GO:BP	endosomal transport	GO:0016197	11/344	113/12175	0.000346625	0.0144427	0.0126564	lap/CG15012/Vti1b/Vps26/fwe/gish/Rab6/Vps50/SIDL/Vti1a/wash
GO:BP	positive regulation of proteasomal protein catabolic process	GO:1901800	7/344	49/12175	0.000418251	0.0170715	0.01496	EloB/fzr/SkpA/CG13605/phyl/wds/Roc1a
GO:BP	cellular response to organic substance	GO:0071310	22/344	354/12175	0.000459928	0.0183971	0.0161217	Dop1R1/Hsp70Ba/CG3061/sxc/Sec13/Der-1/tkv/PICK1/Akap200/SkpA/Hsp70Bbb/Pi3K21B/Hsp70Ab/5-HT1A/poly/BI-1/lncRNA:let7C/RagC-D/Roc1a/Nurf-38/CG30054/5-HT1B
GO:BP	negative regulation of gene expression	GO:0010629	20/344	312/12175	0.000561521	0.0220204	0.0192968	Pink1/Sxl/pros/Psi/Cbp20/SkpA/Rga/Rox8/hop/wech/Fsn/AGO2/Ars2/pho/ssx/BI-1/lncRNA:let7C/rump/Upf1/LSm1
GO:BP	regulation of alternative mRNA splicing, via spliceosome	GO:0000381	9/344	84/12175	0.000589292	0.0226651	0.0198618	Sxl/HnRNP-K/Psi/Rox8/Prp19/SC35/U2af50/B52/Rbp1
GO:BP	glycerophospholipid biosynthetic process	GO:0046474	9/344	85/12175	0.000643021	0.0242649	0.0212637	PIG-U/Pi3K21B/CLS/Socs36E/puml/PIG-K/Pisd/PIG-F/PGAP2
GO:BP	Golgi vesicle transport	GO:0048193	12/344	142/12175	0.000691506	0.0256114	0.0224436	gammaCOP/Sec13/Vti1b/CG3500/Rab2/Rab6/SIDL/Vti1a/Syx16/Cog7/Sec23/Cog6
GO:BP	response to unfolded protein	GO:0006986	6/344	39/12175	0.000722533	0.0259649	0.0227535	Hsp70Ba/Der-1/Hsp70Bbb/Hsp70Ab/BI-1/REPTOR
GO:BP	positive regulation of cellular component organization	GO:0051130	18/344	272/12175	0.000727018	0.0259649	0.0227535	Pink1/lap/RhoGAP92B/Rab21/tkv/PICK1/SkpA/hop/DAAM/PlexB/Cbl/garz/Rpt4/Cortactin/HSPC300/Sec23/wash/vih
GO:BP	response to topologically incorrect protein	GO:0035966	7/344	54/12175	0.000764278	0.0264891	0.0232128	Hsp70Ba/CG3061/Der-1/Hsp70Bbb/Hsp70Ab/BI-1/REPTOR
GO:BP	regulation of proteolysis involved in cellular protein catabolic process	GO:1903050	8/344	70/12175	0.000768183	0.0264891	0.0232128	EloB/DUBAI/fzr/SkpA/CG13605/phyl/wds/Roc1a
GO:BP	positive regulation of proteolysis involved in cellular protein catabolic process	GO:1903052	7/344	55/12175	0.000854878	0.0289789	0.0253947	EloB/fzr/SkpA/CG13605/phyl/wds/Roc1a
GO:BP	intracellular protein transport	GO:0006886	21/344	350/12175	0.000967877	0.0322626	0.0282722	Kap-alpha3/gammaCOP/Sec13/Rab21/Rep/PICK1/AP-1-2beta/Klp64D/Vps26/Srp19/Arf102F/CG7394/Rab6/CG31229/Su(dx)/Vti1a/Syx16/Cog7/CG8728/Sec23/cora
GO:BP	response to organonitrogen compound	GO:0010243	14/344	190/12175	0.00100357	0.032904	0.0288343	Dop1R1/CG3061/Der-1/SkpA/Pi3K21B/CG13605/5-HT1A/poly/Rpt4/RagC-D/Roc1a/Faf2/CG30054/5-HT1B
GO:BP	response to monoamine	GO:0071867	4/344	17/12175	0.00111338	0.0332351	0.0291244	Dop1R1/5-HT1A/CG30054/5-HT1B
GO:BP	cellular response to monoamine stimulus	GO:0071868	4/344	17/12175	0.00111338	0.0332351	0.0291244	Dop1R1/5-HT1A/CG30054/5-HT1B
GO:BP	response to catecholamine	GO:0071869	4/344	17/12175	0.00111338	0.0332351	0.0291244	Dop1R1/5-HT1A/CG30054/5-HT1B
GO:BP	cellular response to catecholamine stimulus	GO:0071870	4/344	17/12175	0.00111338	0.0332351	0.0291244	Dop1R1/5-HT1A/CG30054/5-HT1B
GO:BP	response to dopamine	GO:1903350	4/344	17/12175	0.00111338	0.0332351	0.0291244	Dop1R1/5-HT1A/CG30054/5-HT1B
GO:BP	cellular response to dopamine	GO:1903351	4/344	17/12175	0.00111338	0.0332351	0.0291244	Dop1R1/5-HT1A/CG30054/5-HT1B
GO:BP	response to nitrogen compound	GO:1901698	14/344	196/12175	0.00135332	0.0398035	0.0348804	Dop1R1/CG3061/Der-1/SkpA/Pi3K21B/CG13605/5-HT1A/poly/Rpt4/RagC-D/Roc1a/Faf2/CG30054/5-HT1B
GO:BP	positive regulation of receptor-mediated endocytosis	GO:0048260	4/344	18/12175	0.00139987	0.0402823	0.0353	lap/PICK1/Cbl/Cortactin
GO:BP	cytosolic transport	GO:0016482	7/344	60/12175	0.00144248	0.0402823	0.0353	Vti1b/Vps26/Rab6/Vps50/SIDL/Vti1a/wash
GO:BP	regulation of proteasomal protein catabolic process	GO:0061136	7/344	60/12175	0.00144248	0.0402823	0.0353	EloB/fzr/SkpA/CG13605/phyl/wds/Roc1a
GO:BP	establishment of protein localization	GO:0045184	26/344	488/12175	0.00145016	0.0402823	0.0353	Pink1/Kap-alpha3/gammaCOP/Sec13/RhoGAP92B/Rab21/Rep/PICK1/AP-1-2beta/Klp64D/Vps26/Srp19/Arf102F/CG7394/Rab2/Rab6/CG31229/Su(dx)/Vti1a/garz/Syx16/Cog7/CG8728/Sec23/cora/Tango11
GO:BP	positive regulation of proteasomal ubiquitin-dependent protein catabolic process	GO:0032436	6/344	45/12175	0.00156489	0.0428737	0.0375709	EloB/fzr/SkpA/phyl/wds/Roc1a
GO:BP	regulation of cell-cell adhesion	GO:0022407	5/344	31/12175	0.00162286	0.0438611	0.0384362	baz/disco-r/tkv/wech/Sec23
GO:BP	protein transport	GO:0015031	25/344	467/12175	0.00167	0.0445334	0.0390253	Kap-alpha3/gammaCOP/Sec13/RhoGAP92B/Rab21/Rep/PICK1/AP-1-2beta/Klp64D/Vps26/Srp19/Arf102F/CG7394/Rab2/Rab6/CG31229/Su(dx)/Vti1a/garz/Syx16/Cog7/CG8728/Sec23/cora/Tango11
GO:CC	ribosomal subunit	GO:0044391	27/344	174/12100	5.01852e-13	1.73641e-10	1.39462e-10	CG11700/mRpL23/RpL38/RpL15/RpL36/RpS5b/RpL37A/RpL39/RpS25/RpS26/RpS27A/mRpS9/RpS29/RpS30/mRpS7/bonsai/mRpS10/RpLP1/RpL10/mRpL54/RpS20/RpS10b/mRpL22/RpS15/RpS14a/RpL27A/RpL36A
GO:CC	small ribosomal subunit	GO:0015935	15/344	72/12100	1.25665e-09	2.17401e-07	1.74609e-07	CG11700/RpS5b/RpS25/RpS26/RpS27A/mRpS9/RpS29/RpS30/mRpS7/bonsai/mRpS10/RpS20/RpS10b/RpS15/RpS14a
GO:CC	cytosolic small ribosomal subunit	GO:0022627	11/344	43/12100	2.12985e-08	2.45643e-06	1.97291e-06	CG11700/RpS5b/RpS25/RpS26/RpS27A/RpS29/RpS30/RpS20/RpS10b/RpS15/RpS14a
GO:CC	ribosome	GO:0005840	27/344	281/12100	3.04447e-08	2.63347e-06	2.1151e-06	CG11700/mRpL23/RpL38/RpL15/RpL36/RpS5b/RpL37A/RpL39/RpS25/RpS26/RpS27A/mRpS9/RpS29/RpS30/mRpS7/bonsai/mRpS10/RpLP1/RpL10/mRpL54/RpS20/RpS10b/mRpL22/RpS15/RpS14a/RpL27A/RpL36A
GO:CC	cytosolic ribosome	GO:0022626	20/344	192/12100	5.47017e-07	3.78536e-05	3.04026e-05	CG11700/RpL38/RpL15/RpL36/RpS5b/RpL37A/RpL39/RpS25/RpS26/RpS27A/RpS29/RpS30/RpLP1/RpL10/RpS20/RpS10b/RpS15/RpS14a/RpL27A/RpL36A
GO:CC	transferase complex	GO:1990234	32/344	481/12100	6.85563e-06	0.000395341	0.000317524	lncRNA:roX2/Ubr1/Ost48/Yippee/PhKgamma/EloB/Pa1/Rep/Der-1/Sf3b5/qless/fzr/TfIIFbeta/SkpA/Stt3A/Pi3K21B/Socs36E/CG4911/cerv/Fsn/Taf10/phyl/KLHL18/CG33774/CG15237/wds/Naa30A/Dad1/l(3)73Ah/Roc1a/Dpy-30L1/vih
GO:CC	endoplasmic reticulum subcompartment	GO:0098827	21/344	251/12100	9.78739e-06	0.000467087	0.000375148	Ost48/CG3061/Der-1/stas/Vti1b/PIG-U/CG3500/Stt3A/Lnpk/SelG/CG33774/EMC2A/PIG-K/Vti1a/EMC8-9/Dad1/PIG-F/PGAP2/Tango11/CG31523/l(1)G0320
GO:CC	organelle subcompartment	GO:0031984	26/344	357/12100	1.07997e-05	0.000467087	0.000375148	Ost48/CG3061/Der-1/stas/PICK1/Vti1b/AP-1-2beta/PIG-U/CG3500/Stt3A/Lnpk/SelG/CG33774/EMC2A/PIG-K/Vti1a/garz/Syx16/EMC8-9/Dad1/PIG-F/Sec23/PGAP2/Tango11/CG31523/l(1)G0320
GO:CC	endoplasmic reticulum protein-containing complex	GO:0140534	10/344	68/12100	2.03102e-05	0.00067686	0.000543629	Ost48/Der-1/PIG-U/Stt3A/CG33774/EMC2A/PIG-K/EMC8-9/Dad1/Hsp27
GO:CC	nuclear speck	GO:0016607	7/344	31/12100	2.06099e-05	0.00067686	0.000543629	HnRNP-K/CG31211/SC35/U2af50/B52/Rbp1/ctrip
GO:CC	endoplasmic reticulum membrane	GO:0005789	20/344	244/12100	2.15187e-05	0.00067686	0.000543629	Ost48/CG3061/Der-1/stas/Vti1b/PIG-U/CG3500/Stt3A/SelG/CG33774/EMC2A/PIG-K/Vti1a/EMC8-9/Dad1/PIG-F/PGAP2/Tango11/CG31523/l(1)G0320
GO:CC	cytosolic large ribosomal subunit	GO:0022625	9/344	56/12100	2.54579e-05	0.000734037	0.000589552	RpL38/RpL15/RpL36/RpL37A/RpL39/RpLP1/RpL10/RpL27A/RpL36A
GO:CC	nuclear outer membrane-endoplasmic reticulum membrane network	GO:0042175	20/344	251/12100	3.23465e-05	0.000804556	0.00064619	Ost48/CG3061/Der-1/stas/Vti1b/PIG-U/CG3500/Stt3A/SelG/CG33774/EMC2A/PIG-K/Vti1a/EMC8-9/Dad1/PIG-F/PGAP2/Tango11/CG31523/l(1)G0320
GO:CC	nucleoplasm	GO:0005654	31/344	496/12100	3.25543e-05	0.000804556	0.00064619	Kap-alpha3/HnRNP-K/lncRNA:roX2/EloB/Sec13/Pa1/Sf3b5/Clamp/TfIIFbeta/CG31211/MTA1-like/CG14220/CG31712/PQBP1/CG14207/CG16779/Taf10/Ars2/SC35/CRAT/U2af50/B52/wds/rump/Rbp1/ctrip/Dpy-30L1/CG15432/wash/Brms1/CG9346
GO:CC	large ribosomal subunit	GO:0015934	12/344	105/12100	4.18086e-05	0.000964385	0.000774559	mRpL23/RpL38/RpL15/RpL36/RpL37A/RpL39/RpLP1/RpL10/mRpL54/mRpL22/RpL27A/RpL36A
GO:CC	spliceosomal complex	GO:0005681	16/344	189/12100	9.79288e-05	0.00211771	0.00170087	Sf3b2/Zn72D/CG1965/CG42724/Sf3b5/Cbp20/Prp8/Pep/PQBP1/Prp19/Ars2/U2af50/B52/CG3198/rump/CG7741
GO:CC	precatalytic spliceosome	GO:0071011	13/344	138/12100	0.000151916	0.00309194	0.00248334	Sf3b2/Zn72D/CG1965/CG42724/Sf3b5/Cbp20/Prp8/Pep/PQBP1/Prp19/Ars2/U2af50/B52
GO:CC	ubiquitin ligase complex	GO:0000151	14/344	158/12100	0.000164245	0.00315716	0.00253572	Ubr1/Yippee/EloB/Der-1/fzr/SkpA/CG4911/Fsn/phyl/KLHL18/CG15237/l(3)73Ah/Roc1a/vih
GO:CC	integral component of organelle membrane	GO:0031301	15/344	185/12100	0.000258517	0.00454056	0.00364681	Sfxn1-3/Der-1/PIG-U/CG3500/fwe/CG9773/EMC2A/PIG-K/EMRE/Vti1a/Coq2/EMC8-9/Dad1/CG7506/CG31523
GO:CC	ER to Golgi transport vesicle membrane	GO:0012507	4/344	12/12100	0.000265183	0.00454056	0.00364681	Sec13/Vti1b/Vti1a/Sec23
GO:CC	peptidase complex	GO:1905368	10/344	92/12100	0.000275583	0.00454056	0.00364681	Prosalpha4/Rpn9/Rpn10/Sf3b5/PIG-U/Rpn11/Taf10/PIG-K/Rpt4/Prosbeta4
GO:CC	endopeptidase complex	GO:1905369	8/344	61/12100	0.000311194	0.00489423	0.00393087	Prosalpha4/Rpn9/Rpn10/PIG-U/Rpn11/PIG-K/Rpt4/Prosbeta4

## Sheet: Cluster 4
source	term_name	term_id	GeneRatio	BgRatio	pvalue	p.adjust	qvalue	geneID
GO:MF	G protein-coupled amine receptor activity	GO:0008227	5/129	21/12049	2.30801e-06	0.000530843	0.000417872	Dop1R2/Oamb/Octbeta1R/Dop2R/Octbeta3R
GO:MF	G protein-coupled receptor activity	GO:0004930	8/129	115/12049	3.14753e-05	0.00361966	0.00284934	Dop1R2/Oamb/rk/Dh44-R2/Dh44-R1/Octbeta1R/Dop2R/Octbeta3R
GO:MF	signaling receptor activity	GO:0038023	14/129	399/12049	9.26524e-05	0.00532751	0.00419374	Dop1R2/Rdl/Oamb/rk/Hr51/Dh44-R2/fz/Dh44-R1/arr/ftz-f1/Octbeta1R/GluClalpha/Dop2R/Octbeta3R
GO:MF	molecular transducer activity	GO:0060089	14/129	399/12049	9.26524e-05	0.00532751	0.00419374	Dop1R2/Rdl/Oamb/rk/Hr51/Dh44-R2/fz/Dh44-R1/arr/ftz-f1/Octbeta1R/GluClalpha/Dop2R/Octbeta3R
GO:MF	syntaxin binding	GO:0019905	4/129	26/12049	0.000156175	0.00718406	0.00565519	Sytalpha/cpx/unc-13/Tomosyn
GO:MF	transmembrane signaling receptor activity	GO:0004888	12/129	335/12049	0.000248523	0.00910011	0.00716347	Dop1R2/Rdl/Oamb/rk/Dh44-R2/fz/Dh44-R1/arr/Octbeta1R/GluClalpha/Dop2R/Octbeta3R
GO:MF	voltage-gated cation channel activity	GO:0022843	4/129	30/12049	0.00027696	0.00910011	0.00716347	Elk/KCNQ/Sh/cac
GO:MF	neurotransmitter receptor activity	GO:0030594	5/129	58/12049	0.000378598	0.0108847	0.00856828	Dop1R2/Rdl/Oamb/GluClalpha/Dop2R
GO:MF	voltage-gated potassium channel activity	GO:0005249	3/129	15/12049	0.000496512	0.0126886	0.00998831	Elk/KCNQ/Sh
GO:MF	potassium channel activity	GO:0005267	4/129	37/12049	0.000629936	0.0132069	0.0103963	Elk/slo/KCNQ/Sh
GO:MF	cell adhesion molecule binding	GO:0050839	5/129	66/12049	0.000689744	0.0132069	0.0103963	CG45263/pyd/Gfrl/dock/Fas2
GO:MF	voltage-gated ion channel activity	GO:0005244	4/129	39/12049	0.000771663	0.0132069	0.0103963	Elk/KCNQ/Sh/cac
GO:MF	voltage-gated channel activity	GO:0022832	4/129	39/12049	0.000771663	0.0132069	0.0103963	Elk/KCNQ/Sh/cac
GO:MF	gated channel activity	GO:0022836	8/129	184/12049	0.000803901	0.0132069	0.0103963	Elk/Rdl/slo/Tmc/KCNQ/Sh/cac/GluClalpha
GO:MF	mRNA 3'-UTR binding	GO:0003730	4/129	42/12049	0.00102444	0.0157081	0.0123652	bru2/pum/PIP4K/heph
GO:MF	ion channel activity	GO:0005216	9/129	248/12049	0.00137604	0.0197806	0.015571	Elk/Rdl/slo/Tmc/KCNQ/para/Sh/cac/GluClalpha
GO:MF	SNARE binding	GO:0000149	4/129	50/12049	0.00197344	0.0249268	0.019622	Sytalpha/cpx/unc-13/Tomosyn
GO:MF	channel activity	GO:0015267	9/129	263/12049	0.00205917	0.0249268	0.019622	Elk/Rdl/slo/Tmc/KCNQ/para/Sh/cac/GluClalpha
GO:MF	passive transmembrane transporter activity	GO:0022803	9/129	263/12049	0.00205917	0.0249268	0.019622	Elk/Rdl/slo/Tmc/KCNQ/para/Sh/cac/GluClalpha
GO:MF	potassium ion transmembrane transporter activity	GO:0015079	4/129	55/12049	0.00280486	0.0322559	0.0253914	Elk/slo/KCNQ/Sh
GO:BP	chemical synaptic transmission	GO:0007268	23/134	314/12175	4.29958e-13	2.47152e-10	1.72406e-10	Pka-C1/Plc21C/dysc/Rdl/Oamb/dlg1/Rim/slo/pum/Sytalpha/Slob/cpo/cpx/brp/Fas2/Sh/cac/Ten-a/unc-13/Esyt2/GluClalpha/Tomosyn/Fife
GO:BP	anterograde trans-synaptic signaling	GO:0098916	23/134	314/12175	4.29958e-13	2.47152e-10	1.72406e-10	Pka-C1/Plc21C/dysc/Rdl/Oamb/dlg1/Rim/slo/pum/Sytalpha/Slob/cpo/cpx/brp/Fas2/Sh/cac/Ten-a/unc-13/Esyt2/GluClalpha/Tomosyn/Fife
GO:BP	trans-synaptic signaling	GO:0099537	23/134	316/12175	4.91356e-13	2.47152e-10	1.72406e-10	Pka-C1/Plc21C/dysc/Rdl/Oamb/dlg1/Rim/slo/pum/Sytalpha/Slob/cpo/cpx/brp/Fas2/Sh/cac/Ten-a/unc-13/Esyt2/GluClalpha/Tomosyn/Fife
GO:BP	synaptic signaling	GO:0099536	23/134	324/12175	8.29892e-13	3.13077e-10	2.18393e-10	Pka-C1/Plc21C/dysc/Rdl/Oamb/dlg1/Rim/slo/pum/Sytalpha/Slob/cpo/cpx/brp/Fas2/Sh/cac/Ten-a/unc-13/Esyt2/GluClalpha/Tomosyn/Fife
GO:BP	modulation of chemical synaptic transmission	GO:0050804	15/134	141/12175	3.5981e-11	9.04922e-09	6.31246e-09	Pka-C1/Plc21C/dysc/Rdl/Rim/slo/pum/Slob/cpx/brp/Fas2/Sh/cac/Tomosyn/Fife
GO:BP	regulation of trans-synaptic signaling	GO:0099177	15/134	141/12175	3.5981e-11	9.04922e-09	6.31246e-09	Pka-C1/Plc21C/dysc/Rdl/Rim/slo/pum/Slob/cpx/brp/Fas2/Sh/cac/Tomosyn/Fife
GO:BP	cell junction organization	GO:0034330	21/134	367/12175	5.09106e-10	1.09749e-07	7.65573e-08	crb/dysc/scrib/pyd/dlg1/slo/DIP-kappa/pum/dpr8/cpx/brp/Fas2/Octbeta1R/cac/sdt/Ten-a/unc-13/dpr6/Abp1/l(3)neo38/Fife
GO:BP	regulation of transport	GO:0051049	19/134	299/12175	6.43326e-10	1.21347e-07	8.46482e-08	Pka-C1/crb/dysc/Pkc53E/Rab27/scrib/pyd/Sytalpha/PIP4K/Slob/Rgk1/cpx/cac/sdt/PGRP-LE/sbr/Tomosyn/Cam/Fife
GO:BP	growth	GO:0040007	22/134	429/12175	1.48921e-09	2.49691e-07	1.74177e-07	Pka-C1/pan/crb/dysc/ey/Hr51/scrib/dlg1/sNPF/slo/fz/pum/PIP4K/arr/cpx/Fas2/Octbeta1R/cac/Ten-a/Abp1/chrb/PNUTS
GO:BP	developmental growth	GO:0048589	20/134	366/12175	3.04783e-09	4.59918e-07	3.20824e-07	Pka-C1/pan/crb/dysc/Hr51/scrib/dlg1/sNPF/slo/fz/pum/PIP4K/arr/cpx/Fas2/Octbeta1R/cac/Ten-a/Abp1/PNUTS
GO:BP	learning or memory	GO:0007611	14/134	165/12175	3.39272e-09	4.61619e-07	3.22011e-07	14-3-3zeta/Pka-C1/rad/Rdl/Oamb/scrib/pum/arr/Rgk1/brp/Fas2/Sh/Dop2R/Tomosyn
GO:BP	cognition	GO:0050890	14/134	166/12175	3.67093e-09	4.61619e-07	3.22011e-07	14-3-3zeta/Pka-C1/rad/Rdl/Oamb/scrib/pum/arr/Rgk1/brp/Fas2/Sh/Dop2R/Tomosyn
GO:BP	circadian rhythm	GO:0007623	13/134	152/12175	1.15388e-08	1.33939e-06	9.3432e-07	Dop1R2/Pka-C1/Plc21C/Pka-R2/dysc/Rdl/Oamb/Hr51/dlg1/sNPF/slo/Sh/lark
GO:BP	rhythmic process	GO:0048511	13/134	153/12175	1.24934e-08	1.34661e-06	9.39355e-07	Dop1R2/Pka-C1/Plc21C/Pka-R2/dysc/Rdl/Oamb/Hr51/dlg1/sNPF/slo/Sh/lark
GO:BP	cell junction assembly	GO:0034329	15/134	225/12175	2.45531e-08	2.47004e-06	1.72303e-06	crb/dysc/scrib/pyd/dlg1/slo/pum/cpx/Fas2/Octbeta1R/cac/sdt/Ten-a/Abp1/Fife
GO:BP	synapse organization	GO:0050808	17/134	299/12175	2.89126e-08	2.58591e-06	1.80385e-06	dysc/dlg1/slo/DIP-kappa/pum/dpr8/cpx/brp/Fas2/Octbeta1R/cac/Ten-a/unc-13/dpr6/Abp1/l(3)neo38/Fife
GO:BP	circadian behavior	GO:0048512	11/134	109/12175	2.91322e-08	2.58591e-06	1.80385e-06	Dop1R2/Pka-C1/Pka-R2/dysc/Rdl/Oamb/Hr51/dlg1/slo/Sh/lark
GO:BP	rhythmic behavior	GO:0007622	11/134	110/12175	3.20689e-08	2.68845e-06	1.87538e-06	Dop1R2/Pka-C1/Pka-R2/dysc/Rdl/Oamb/Hr51/dlg1/slo/Sh/lark
GO:BP	neuromuscular junction development	GO:0007528	13/134	182/12175	9.91861e-08	7.87747e-06	5.49508e-06	dysc/dlg1/slo/DIP-kappa/pum/cpx/Fas2/Octbeta1R/cac/Ten-a/unc-13/Abp1/l(3)neo38
GO:BP	exocytosis	GO:0006887	10/134	99/12175	1.26285e-07	9.52821e-06	6.64658e-06	Rab27/Rim/g/Sytalpha/cpx/cac/unc-13/Esyt2/Tomosyn/Fife
GO:BP	regulation of growth	GO:0040008	16/134	299/12175	1.75318e-07	1.23253e-05	8.59772e-06	crb/dysc/ey/Hr51/scrib/dlg1/sNPF/slo/fz/pum/PIP4K/Fas2/Octbeta1R/cac/Abp1/chrb
GO:BP	anesthesia-resistant memory	GO:0007615	5/134	13/12175	1.79692e-07	1.23253e-05	8.59772e-06	Pka-C1/rad/Rgk1/brp/Dop2R
GO:BP	adult behavior	GO:0030534	12/134	163/12175	2.27346e-07	1.43492e-05	1.00095e-05	Plc21C/Pka-R2/ey/dlg1/sNPF/Bacc/pum/dati/brp/Fas2/Sh/cac
GO:BP	regulation of developmental growth	GO:0048638	14/134	230/12175	2.28217e-07	1.43492e-05	1.00095e-05	crb/dysc/Hr51/scrib/dlg1/sNPF/slo/fz/pum/PIP4K/Fas2/Octbeta1R/cac/Abp1
GO:BP	neuromuscular synaptic transmission	GO:0007274	9/134	81/12175	2.41538e-07	1.45792e-05	1.017e-05	Plc21C/dysc/Rim/slo/Slob/cpx/brp/Ten-a/Tomosyn
GO:BP	memory	GO:0007613	10/134	118/12175	6.61998e-07	3.83699e-05	2.67656e-05	Pka-C1/rad/scrib/pum/arr/Rgk1/brp/Fas2/Dop2R/Tomosyn
GO:BP	negative regulation of cell communication	GO:0010648	17/134	373/12175	6.86538e-07	3.83699e-05	2.67656e-05	Pka-C1/crb/dysc/Rdl/dlg1/slo/Mkp3/pum/PIP4K/mts/cpx/dock/CG7378/Fas2/eIF4A/chrb/Cam
GO:BP	negative regulation of signaling	GO:0023057	17/134	374/12175	7.12592e-07	3.84036e-05	2.67892e-05	Pka-C1/crb/dysc/Rdl/dlg1/slo/Mkp3/pum/PIP4K/mts/cpx/dock/CG7378/Fas2/eIF4A/chrb/Cam
GO:BP	brain development	GO:0007420	10/134	120/12175	7.73905e-07	4.02698e-05	2.80909e-05	toy/ey/dac/Hr51/dati/ftz-f1/Fas2/Ten-a/Lis-1/l(3)neo38
GO:BP	neuron projection development	GO:0031175	19/134	474/12175	1.0143e-06	5.10195e-05	3.55896e-05	Pka-C1/jim/Pka-R2/crb/dysc/dac/Hr51/fz/fs(1)h/pum/dati/ftz-f1/dock/Fas2/lola/Ten-a/Lis-1/Abp1/Cam
GO:BP	developmental maturation	GO:0021700	13/134	224/12175	1.0843e-06	5.27809e-05	3.68183e-05	14-3-3zeta/Pka-C1/rk/Hr51/scrib/dlg1/Rim/ftz-f1/ctp/Fas2/cac/unc-13/heph
GO:BP	establishment or maintenance of cell polarity	GO:0007163	12/134	190/12175	1.18112e-06	5.56973e-05	3.88527e-05	14-3-3zeta/Pka-C1/crb/scrib/dlg1/fz/mts/ctp/lola/sdt/Lis-1/heph
GO:BP	locomotory behavior	GO:0007626	12/134	191/12175	1.24861e-06	5.70955e-05	3.9828e-05	Plc21C/Pka-R2/dysc/ey/Hr51/dlg1/Tmc/dati/brp/Sh/cac/lark
GO:BP	neurotransmitter secretion	GO:0007269	9/134	101/12175	1.60624e-06	6.92518e-05	4.83079e-05	Rim/Sytalpha/cpx/brp/cac/unc-13/Esyt2/Tomosyn/Fife
GO:BP	signal release from synapse	GO:0099643	9/134	101/12175	1.60624e-06	6.92518e-05	4.83079e-05	Rim/Sytalpha/cpx/brp/cac/unc-13/Esyt2/Tomosyn/Fife
GO:BP	cellular response to organic substance	GO:0071310	16/134	354/12175	1.67199e-06	7.00843e-05	4.88887e-05	Dop1R2/Pka-C1/Pka-R2/rk/Dh44-R2/Dh44-R1/Mkp3/PIP4K/mts/ftz-f1/dock/Sh/Lis-1/Dop2R/eIF4A/Cam
GO:BP	cell-cell adhesion	GO:0098609	10/134	136/12175	2.44243e-06	9.6931e-05	6.7616e-05	CG45263/glec/rk/scrib/pyd/dlg1/fz/Fas2/Ten-a/beat-VII
GO:BP	cellular response to endogenous stimulus	GO:0071495	13/134	241/12175	2.45679e-06	9.6931e-05	6.7616e-05	Dop1R2/rk/Dh44-R2/Dh44-R1/Mkp3/PIP4K/mts/ftz-f1/dock/Sh/Lis-1/Dop2R/eIF4A
GO:BP	synapse assembly	GO:0007416	11/134	169/12175	2.50517e-06	9.6931e-05	6.7616e-05	dysc/dlg1/slo/pum/cpx/Fas2/Octbeta1R/cac/Ten-a/Abp1/Fife
GO:BP	mushroom body development	GO:0016319	8/134	80/12175	2.60089e-06	9.81184e-05	6.84444e-05	toy/ey/dac/Hr51/dati/ftz-f1/Fas2/Lis-1
GO:BP	establishment of cell polarity	GO:0030010	7/134	57/12175	2.79518e-06	9.82278e-05	6.85207e-05	scrib/dlg1/fz/mts/ctp/sdt/Lis-1
GO:BP	adrenergic receptor signaling pathway	GO:0071875	4/134	10/12175	2.79907e-06	9.82278e-05	6.85207e-05	Dop1R2/Octbeta1R/Dop2R/Octbeta3R
GO:BP	adenylate cyclase-activating adrenergic receptor signaling pathway	GO:0071880	4/134	10/12175	2.79907e-06	9.82278e-05	6.85207e-05	Dop1R2/Octbeta1R/Dop2R/Octbeta3R
GO:BP	regulation of membrane potential	GO:0042391	8/134	82/12175	3.13951e-06	0.000106499	7.42902e-05	Elk/Rdl/Slob/para/Sh/cac/GluClalpha/Fife
GO:BP	synaptic assembly at neuromuscular junction	GO:0051124	10/134	140/12175	3.1759e-06	0.000106499	7.42902e-05	dysc/dlg1/slo/pum/cpx/Fas2/Octbeta1R/cac/Ten-a/Abp1
GO:BP	chemosensory behavior	GO:0007635	9/134	110/12175	3.2857e-06	0.000107785	7.51876e-05	Pka-C1/rad/Rdl/Oamb/scrib/Tmc/Prps/Fas2/Sh
GO:BP	response to endogenous stimulus	GO:0009719	13/134	249/12175	3.52381e-06	0.000113137	7.89206e-05	Dop1R2/rk/Dh44-R2/Dh44-R1/Mkp3/PIP4K/mts/ftz-f1/dock/Sh/Lis-1/Dop2R/eIF4A
GO:BP	regulation of neurotransmitter levels	GO:0001505	9/134	112/12175	3.81667e-06	0.000118412	8.26005e-05	Rim/Sytalpha/cpx/brp/cac/unc-13/Esyt2/Tomosyn/Fife
GO:BP	head development	GO:0060322	10/134	143/12175	3.84506e-06	0.000118412	8.26005e-05	toy/ey/dac/Hr51/dati/ftz-f1/Fas2/Ten-a/Lis-1/l(3)neo38
GO:BP	adenylate cyclase-modulating G protein-coupled receptor signaling pathway	GO:0007188	7/134	61/12175	4.44688e-06	0.000134207	9.36186e-05	Dop1R2/rk/Dh44-R2/Dh44-R1/Octbeta1R/Dop2R/Octbeta3R
GO:BP	cell morphogenesis involved in neuron differentiation	GO:0048667	17/134	434/12175	5.3939e-06	0.000159596	0.000111329	jim/Pka-R2/crb/dysc/dac/Hr51/fz/fs(1)h/pum/ftz-f1/dock/Fas2/lola/Ten-a/Lis-1/Abp1/Cam
GO:BP	regulated exocytosis	GO:0045055	7/134	64/12175	6.16088e-06	0.000176527	0.00012314	Rim/Sytalpha/cpx/unc-13/Esyt2/Tomosyn/Fife
GO:BP	neuron projection morphogenesis	GO:0048812	17/134	439/12175	6.27892e-06	0.000176527	0.00012314	jim/Pka-R2/crb/dysc/dac/Hr51/fz/fs(1)h/pum/ftz-f1/dock/Fas2/lola/Ten-a/Lis-1/Abp1/Cam
GO:BP	calcium-ion regulated exocytosis	GO:0017156	4/134	12/12175	6.48575e-06	0.000176527	0.00012314	Rim/Sytalpha/unc-13/Fife
GO:BP	regulation of synapse structure or activity	GO:0050803	11/134	187/12175	6.66333e-06	0.000176527	0.00012314	dysc/scrib/dlg1/slo/pum/Fas2/Octbeta1R/Sh/cac/Ten-a/Abp1
GO:BP	cell projection morphogenesis	GO:0048858	17/134	441/12175	6.66802e-06	0.000176527	0.00012314	jim/Pka-R2/crb/dysc/dac/Hr51/fz/fs(1)h/pum/ftz-f1/dock/Fas2/lola/Ten-a/Lis-1/Abp1/Cam
GO:BP	plasma membrane bounded cell projection morphogenesis	GO:0120039	17/134	441/12175	6.66802e-06	0.000176527	0.00012314	jim/Pka-R2/crb/dysc/dac/Hr51/fz/fs(1)h/pum/ftz-f1/dock/Fas2/lola/Ten-a/Lis-1/Abp1/Cam
GO:BP	regulation of vesicle-mediated transport	GO:0060627	9/134	122/12175	7.7227e-06	0.000200923	0.000140158	Pkc53E/Rab27/scrib/pyd/Sytalpha/PIP4K/sdt/PGRP-LE/Tomosyn
GO:BP	response to oxygen-containing compound	GO:1901700	15/134	354/12175	7.90144e-06	0.000202089	0.000140971	Dop1R2/Pka-C1/Pka-R2/dlg1/Bacc/Mkp3/pum/PIP4K/mts/ftz-f1/dock/Fas2/Sh/Dop2R/Cam
GO:BP	cell part morphogenesis	GO:0032990	17/134	449/12175	8.45042e-06	0.000212528	0.000148253	jim/Pka-R2/crb/dysc/dac/Hr51/fz/fs(1)h/pum/ftz-f1/dock/Fas2/lola/Ten-a/Lis-1/Abp1/Cam
GO:BP	cell maturation	GO:0048469	11/134	195/12175	9.92879e-06	0.000245615	0.000171334	14-3-3zeta/Pka-C1/Hr51/scrib/dlg1/Rim/ftz-f1/ctp/Fas2/cac/heph
GO:BP	negative regulation of transport	GO:0051051	6/134	46/12175	1.0368e-05	0.000252343	0.000176027	Pka-C1/pyd/PIP4K/Slob/Rgk1/cpx
GO:BP	anatomical structure maturation	GO:0071695	11/134	197/12175	1.09357e-05	0.000261935	0.000182718	14-3-3zeta/Pka-C1/Hr51/scrib/dlg1/Rim/ftz-f1/ctp/Fas2/cac/heph
GO:BP	response to ethanol	GO:0045471	7/134	70/12175	1.12551e-05	0.000265373	0.000185116	Pka-C1/Pka-R2/dlg1/Bacc/pum/Fas2/Cam
GO:BP	neurotransmitter transport	GO:0006836	9/134	129/12175	1.21612e-05	0.000282328	0.000196943	Rim/Sytalpha/cpx/brp/cac/unc-13/Esyt2/Tomosyn/Fife
GO:BP	cellular response to chemical stimulus	GO:0070887	17/134	468/12175	1.45079e-05	0.000331703	0.000231385	Dop1R2/Pka-C1/Pka-R2/rk/Dh44-R2/Dh44-R1/Mkp3/Sytalpha/PIP4K/mts/ftz-f1/dock/Sh/Lis-1/Dop2R/eIF4A/Cam
GO:BP	post-embryonic animal organ development	GO:0048569	17/134	471/12175	1.57573e-05	0.000354892	0.000247562	Pka-C1/pan/ey/dac/Hr51/scrib/dlg1/fz/Mkp3/arr/ftz-f1/ctp/Fas2/ocm/cg/lola/heph
GO:BP	epithelial tube morphogenesis	GO:0060562	17/134	472/12175	1.61947e-05	0.000359379	0.000250691	Pka-C1/pan/crb/ey/dac/Hr51/scrib/pyd/dlg1/fz/Mkp3/arr/ftz-f1/ctp/Fas2/cg/heph
GO:BP	cell morphogenesis involved in differentiation	GO:0000904	17/134	478/12175	1.90544e-05	0.000416711	0.000290685	jim/Pka-R2/crb/dysc/dac/Hr51/fz/fs(1)h/pum/ftz-f1/dock/Fas2/lola/Ten-a/Lis-1/Abp1/Cam
GO:BP	adherens junction assembly	GO:0034333	4/134	16/12175	2.30441e-05	0.000496766	0.000346528	crb/scrib/pyd/sdt
GO:BP	photoreceptor cell development	GO:0042461	8/134	108/12175	2.44077e-05	0.000518749	0.000361863	crb/dysc/dac/Smyd4-1/lola/sdt/Lis-1/Cam
GO:BP	signal release	GO:0023061	9/134	142/12175	2.62785e-05	0.000550754	0.000384189	Rim/Sytalpha/cpx/brp/cac/unc-13/Esyt2/Tomosyn/Fife
GO:BP	photoreceptor cell differentiation	GO:0046530	11/134	217/12175	2.7006e-05	0.000558246	0.000389415	crb/dysc/dac/scrib/fz/mts/Smyd4-1/lola/sdt/Lis-1/Cam
GO:BP	neuron maturation	GO:0042551	6/134	55/12175	2.95899e-05	0.000599176	0.000417967	Hr51/Rim/ftz-f1/ctp/Fas2/cac
GO:BP	regulation of synaptic assembly at neuromuscular junction	GO:0008582	8/134	111/12175	2.97801e-05	0.000599176	0.000417967	dysc/dlg1/slo/pum/Fas2/Octbeta1R/cac/Abp1
GO:BP	instar larval or pupal morphogenesis	GO:0048707	16/134	449/12175	3.33433e-05	0.000662041	0.000461819	Pka-C1/pan/ey/dac/Hr51/scrib/dlg1/fz/Mkp3/arr/ftz-f1/ctp/Fas2/cg/Cam/heph
GO:BP	imaginal disc morphogenesis	GO:0007560	15/134	401/12175	3.42764e-05	0.000663117	0.00046257	Pka-C1/pan/ey/dac/Hr51/scrib/dlg1/fz/Mkp3/arr/ftz-f1/ctp/Fas2/cg/heph
GO:BP	post-embryonic animal organ morphogenesis	GO:0048563	15/134	401/12175	3.42764e-05	0.000663117	0.00046257	Pka-C1/pan/ey/dac/Hr51/scrib/dlg1/fz/Mkp3/arr/ftz-f1/ctp/Fas2/cg/heph
GO:BP	secretion by cell	GO:0032940	11/134	228/12175	4.25298e-05	0.000812373	0.000566686	Rab27/Rim/g/Sytalpha/cpx/brp/cac/unc-13/Esyt2/Tomosyn/Fife
GO:BP	regulation of neuromuscular junction development	GO:1904396	8/134	117/12175	4.35258e-05	0.000821005	0.000572708	dysc/dlg1/slo/pum/Fas2/Octbeta1R/cac/Abp1
GO:BP	compound eye photoreceptor cell differentiation	GO:0001751	10/134	189/12175	4.41749e-05	0.000822962	0.000574073	crb/dysc/dac/scrib/fz/mts/Smyd4-1/lola/Lis-1/Cam
GO:BP	G protein-coupled receptor signaling pathway	GO:0007186	11/134	230/12175	4.60543e-05	0.000831101	0.00057975	Dop1R2/Oamb/rk/sNPF/Dh44-R2/fz/Dh44-R1/Octbeta1R/Dop2R/Octbeta3R/Cam
GO:BP	cellular response to hormone stimulus	GO:0032870	8/134	118/12175	4.62641e-05	0.000831101	0.00057975	rk/Dh44-R2/Dh44-R1/Mkp3/PIP4K/mts/ftz-f1/dock
GO:BP	regulation of synapse assembly	GO:0051963	8/134	118/12175	4.62641e-05	0.000831101	0.00057975	dysc/dlg1/slo/pum/Fas2/Octbeta1R/cac/Abp1
GO:BP	post-embryonic animal morphogenesis	GO:0009886	16/134	462/12175	4.69944e-05	0.000834289	0.000581974	Pka-C1/pan/ey/dac/Hr51/scrib/dlg1/fz/Mkp3/arr/ftz-f1/ctp/Fas2/cg/Cam/heph
GO:BP	eye development	GO:0001654	15/134	414/12175	4.94104e-05	0.000847277	0.000591034	toy/crb/dysc/ey/dac/scrib/fz/mts/arr/Fas2/Smyd4-1/lola/Lis-1/a/Cam
GO:BP	sensory system development	GO:0048880	15/134	414/12175	4.94104e-05	0.000847277	0.000591034	toy/crb/dysc/ey/dac/scrib/fz/mts/arr/Fas2/Smyd4-1/lola/Lis-1/a/Cam
GO:BP	visual system development	GO:0150063	15/134	414/12175	4.94104e-05	0.000847277	0.000591034	toy/crb/dysc/ey/dac/scrib/fz/mts/arr/Fas2/Smyd4-1/lola/Lis-1/a/Cam
GO:BP	cellular response to oxygen-containing compound	GO:1901701	10/134	192/12175	5.04829e-05	0.000855941	0.000597078	Dop1R2/Pka-C1/Pka-R2/Mkp3/PIP4K/mts/dock/Sh/Dop2R/Cam
GO:BP	response to alcohol	GO:0097305	8/134	120/12175	5.21731e-05	0.00087477	0.000610212	Pka-C1/Pka-R2/dlg1/Bacc/pum/ftz-f1/Fas2/Cam
GO:BP	regulation of synapse organization	GO:0050807	9/134	157/12175	5.79148e-05	0.000925455	0.000645568	dysc/dlg1/slo/pum/Fas2/Octbeta1R/cac/Ten-a/Abp1
GO:BP	export from cell	GO:0140352	11/134	236/12175	5.81785e-05	0.000925455	0.000645568	Rab27/Rim/g/Sytalpha/cpx/brp/cac/unc-13/Esyt2/Tomosyn/Fife
GO:BP	olfactory behavior	GO:0042048	7/134	90/12175	5.84532e-05	0.000925455	0.000645568	Pka-C1/rad/Rdl/Oamb/scrib/Prps/Fas2
GO:BP	compound eye photoreceptor development	GO:0042051	7/134	90/12175	5.84532e-05	0.000925455	0.000645568	crb/dysc/dac/Smyd4-1/lola/Lis-1/Cam
GO:BP	regulation of circadian rhythm	GO:0042752	7/134	90/12175	5.84532e-05	0.000925455	0.000645568	Dop1R2/Pka-C1/Plc21C/Rdl/Oamb/Sh/lark
GO:BP	positive regulation of axonogenesis	GO:0050772	4/134	20/12175	5.92836e-05	0.000925455	0.000645568	Hr51/fz/Lis-1/Abp1
GO:BP	eye photoreceptor cell differentiation	GO:0001754	10/134	196/12175	6.00777e-05	0.000925455	0.000645568	crb/dysc/dac/scrib/fz/mts/Smyd4-1/lola/Lis-1/Cam
GO:BP	enzyme linked receptor protein signaling pathway	GO:0007167	12/134	280/12175	6.01024e-05	0.000925455	0.000645568	14-3-3zeta/ey/dlg1/Mkp3/pum/PIP4K/mts/dock/Fas2/PVRAP/Lis-1/eIF4A
GO:BP	positive regulation of growth	GO:0045927	8/134	123/12175	6.22074e-05	0.00093686	0.000653524	ey/Hr51/dlg1/sNPF/fz/PIP4K/cac/Abp1
GO:BP	regulation of cell junction assembly	GO:1901888	8/134	123/12175	6.22074e-05	0.00093686	0.000653524	dysc/dlg1/slo/pum/Fas2/Octbeta1R/cac/Abp1
GO:BP	positive regulation of multicellular organismal process	GO:0051240	10/134	197/12175	6.27057e-05	0.00093686	0.000653524	Oamb/Hr51/dlg1/sNPF/fz/PIP4K/Sh/cac/Lis-1/Abp1
GO:BP	metamorphosis	GO:0007552	16/134	474/12175	6.376e-05	0.000943272	0.000657998	Pka-C1/pan/ey/dac/Hr51/scrib/dlg1/fz/Mkp3/arr/ftz-f1/ctp/Fas2/cg/Cam/heph
GO:BP	response to hormone	GO:0009725	8/134	125/12175	6.97507e-05	0.00102188	0.000712833	rk/Dh44-R2/Dh44-R1/Mkp3/PIP4K/mts/ftz-f1/dock
GO:BP	eye morphogenesis	GO:0048592	13/134	331/12175	7.18886e-05	0.00102669	0.000716189	crb/dysc/ey/dac/scrib/fz/mts/arr/Fas2/Smyd4-1/lola/Lis-1/Cam
GO:BP	sensory organ morphogenesis	GO:0090596	13/134	331/12175	7.18886e-05	0.00102669	0.000716189	crb/dysc/ey/dac/scrib/fz/mts/arr/Fas2/Smyd4-1/lola/Lis-1/Cam
GO:BP	eye photoreceptor cell development	GO:0042462	7/134	93/12175	7.21202e-05	0.00102669	0.000716189	crb/dysc/dac/Smyd4-1/lola/Lis-1/Cam
GO:BP	regulation of response to external stimulus	GO:0032101	11/134	245/12175	8.1472e-05	0.00114898	0.000801495	mtd/Hr51/dlg1/sNPF/fz/Tmc/Ptip/lola/PGRP-LE/Cam/Rm62
GO:BP	negative regulation of synaptic transmission	GO:0050805	4/134	22/12175	8.79909e-05	0.00121875	0.000850162	dysc/Rdl/slo/cpx
GO:BP	compound eye development	GO:0048749	14/134	386/12175	8.83692e-05	0.00121875	0.000850162	toy/crb/dysc/ey/dac/scrib/fz/mts/arr/Smyd4-1/lola/Lis-1/a/Cam
GO:BP	axon development	GO:0061564	13/134	338/12175	8.8842e-05	0.00121875	0.000850162	Pka-C1/Pka-R2/dysc/dac/Hr51/fz/dock/Fas2/lola/Ten-a/Lis-1/Abp1/Cam
GO:BP	adenylate cyclase-activating G protein-coupled receptor signaling pathway	GO:0007189	5/134	42/12175	9.1926e-05	0.0012497	0.000871749	Dop1R2/rk/Octbeta1R/Dop2R/Octbeta3R
GO:BP	secretion	GO:0046903	11/134	250/12175	9.75709e-05	0.00131459	0.00091702	Rab27/Rim/g/Sytalpha/cpx/brp/cac/unc-13/Esyt2/Tomosyn/Fife
GO:BP	anatomical structure homeostasis	GO:0060249	8/134	132/12175	0.000102401	0.00136746	0.000953897	Dop1R2/Plc21C/crb/CG46339/fz/Mkp3/cac/Cam
GO:BP	positive regulation of developmental growth	GO:0048639	7/134	99/12175	0.000107306	0.0014204	0.000990825	Hr51/dlg1/sNPF/fz/PIP4K/cac/Abp1
GO:BP	negative regulation of signal transduction	GO:0009968	13/134	346/12175	0.000112368	0.0014623	0.00102005	Pka-C1/crb/dlg1/Mkp3/pum/PIP4K/mts/dock/CG7378/Fas2/eIF4A/chrb/Cam
GO:BP	cell population proliferation	GO:0008283	12/134	299/12175	0.00011241	0.0014623	0.00102005	pan/crb/Pkc53E/mtd/ey/scrib/fz/CG9123/Mkp3/mts/cpo/Lis-1
GO:BP	transmembrane receptor protein tyrosine kinase signaling pathway	GO:0007169	10/134	212/12175	0.000115556	0.00149037	0.00103964	14-3-3zeta/ey/dlg1/Mkp3/pum/PIP4K/mts/dock/Fas2/PVRAP
GO:BP	regulation of cell population proliferation	GO:0042127	10/134	213/12175	0.000120128	0.00153622	0.00107162	pan/crb/Pkc53E/mtd/ey/scrib/fz/Mkp3/mts/cpo
GO:BP	positive regulation of cell growth	GO:0030307	5/134	45/12175	0.000128585	0.00161695	0.00112794	ey/Hr51/fz/PIP4K/Abp1
GO:BP	regulation of circadian sleep/wake cycle	GO:0042749	5/134	45/12175	0.000128585	0.00161695	0.00112794	Dop1R2/Pka-C1/Rdl/Oamb/Sh
GO:BP	cell adhesion	GO:0007155	10/134	216/12175	0.000134776	0.0016808	0.00117247	CG45263/glec/rk/scrib/pyd/dlg1/fz/Fas2/Ten-a/beat-VII
GO:BP	axon guidance	GO:0007411	11/134	260/12175	0.000138056	0.00170759	0.00119116	Pka-R2/dysc/dac/Hr51/fz/dock/Fas2/lola/Ten-a/Lis-1/Cam
GO:BP	olfactory learning	GO:0008355	5/134	46/12175	0.000143002	0.00175438	0.0012238	Pka-C1/rad/Rdl/Oamb/Fas2
GO:BP	regulation of ion transport	GO:0043269	6/134	74/12175	0.0001594	0.0019398	0.00135314	dysc/Sytalpha/Slob/Rgk1/cac/Cam
GO:BP	compound eye morphogenesis	GO:0001745	12/134	313/12175	0.000172586	0.00206505	0.00144051	crb/dysc/ey/dac/scrib/fz/mts/arr/Smyd4-1/lola/Lis-1/Cam
GO:BP	negative regulation of insulin receptor signaling pathway	GO:0046627	4/134	26/12175	0.000173798	0.00206505	0.00144051	Mkp3/PIP4K/mts/dock
GO:BP	negative regulation of cellular response to insulin stimulus	GO:1900077	4/134	26/12175	0.000173798	0.00206505	0.00144051	Mkp3/PIP4K/mts/dock
GO:BP	neuron projection guidance	GO:0097485	11/134	268/12175	0.000180022	0.00212229	0.00148045	Pka-R2/dysc/dac/Hr51/fz/dock/Fas2/lola/Ten-a/Lis-1/Cam
GO:BP	biological adhesion	GO:0022610	10/134	225/12175	0.000188093	0.00220025	0.00153482	CG45263/glec/rk/scrib/pyd/dlg1/fz/Fas2/Ten-a/beat-VII
GO:BP	regulation of multicellular organismal development	GO:2000026	11/134	271/12175	0.000198335	0.00230221	0.00160595	rk/Hr51/pyd/dlg1/fz/mts/Octbeta1R/cac/Lis-1/lark/Abp1
GO:BP	circadian sleep/wake cycle	GO:0042745	5/134	50/12175	0.000213392	0.00245808	0.00171468	Dop1R2/Pka-C1/Rdl/Oamb/Sh
GO:BP	cell growth	GO:0016049	8/134	147/12175	0.000215879	0.00246789	0.00172153	Pka-C1/pan/ey/Hr51/fz/PIP4K/arr/Abp1
GO:BP	chemotaxis	GO:0006935	11/134	277/12175	0.000239738	0.00272004	0.00189741	Pka-R2/dysc/dac/Hr51/fz/dock/Fas2/lola/Ten-a/Lis-1/Cam
GO:BP	axonogenesis	GO:0007409	12/134	325/12175	0.000244323	0.00274989	0.00191823	Pka-R2/dysc/dac/Hr51/fz/dock/Fas2/lola/Ten-a/Lis-1/Abp1/Cam
GO:BP	reproductive behavior	GO:0019098	8/134	150/12175	0.000247836	0.00274989	0.00191823	Oamb/dlg1/slo/Tmc/dati/para/Sh/cac
GO:BP	positive regulation of transport	GO:0051050	8/134	150/12175	0.000247836	0.00274989	0.00191823	dysc/Pkc53E/Rab27/cac/sdt/PGRP-LE/sbr/Fife
GO:BP	R3/R4 cell fate commitment	GO:0007464	3/134	12/12175	0.000266708	0.00293768	0.00204924	scrib/fz/lola
GO:BP	regulation of neuromuscular synaptic transmission	GO:1900073	4/134	29/12175	0.000269142	0.00294301	0.00205295	Plc21C/dysc/slo/Tomosyn
GO:BP	neuron remodeling	GO:0016322	5/134	53/12175	0.000281499	0.00305598	0.00213176	Hr51/ftz-f1/ctp/Fas2/cac
GO:BP	centriole replication	GO:0007099	4/134	30/12175	0.000307915	0.00327213	0.00228254	CG17816/mts/Cep97/Cam
GO:BP	hormone-mediated signaling pathway	GO:0009755	4/134	30/12175	0.000307915	0.00327213	0.00228254	rk/Dh44-R2/Dh44-R1/ftz-f1
GO:BP	photoreceptor cell axon guidance	GO:0072499	4/134	30/12175	0.000307915	0.00327213	0.00228254	dysc/Fas2/Lis-1/Cam
GO:BP	behavioral response to ethanol	GO:0048149	5/134	55/12175	0.000335301	0.00353824	0.00246817	Pka-R2/dlg1/Bacc/pum/Fas2
GO:BP	imaginal disc-derived appendage morphogenesis	GO:0035114	12/134	338/12175	0.000349321	0.00364797	0.00254471	Pka-C1/pan/dac/Hr51/scrib/fz/Mkp3/arr/ftz-f1/ctp/cg/heph
GO:BP	centriole assembly	GO:0098534	4/134	31/12175	0.000350534	0.00364797	0.00254471	CG17816/mts/Cep97/Cam
GO:BP	appendage morphogenesis	GO:0035107	12/134	339/12175	0.000358781	0.00370822	0.00258674	Pka-C1/pan/dac/Hr51/scrib/fz/Mkp3/arr/ftz-f1/ctp/cg/heph
GO:BP	taxis	GO:0042330	12/134	341/12175	0.000378355	0.00388393	0.00270931	Pka-R2/dysc/dac/Hr51/dlg1/fz/dock/Fas2/lola/Ten-a/Lis-1/Cam
GO:BP	cellular response to organonitrogen compound	GO:0071417	7/134	122/12175	0.000391728	0.00398926	0.00278279	Dop1R2/Mkp3/PIP4K/mts/dock/Sh/Dop2R
GO:BP	associative learning	GO:0008306	5/134	57/12175	0.000396547	0.00398926	0.00278279	Pka-C1/rad/Rdl/Oamb/Fas2
GO:BP	synaptic vesicle exocytosis	GO:0016079	5/134	57/12175	0.000396547	0.00398926	0.00278279	cpx/unc-13/Esyt2/Tomosyn/Fife
GO:BP	wing disc development	GO:0035220	13/134	394/12175	0.000399742	0.00399477	0.00278663	Pka-C1/pan/crb/Hr51/scrib/pyd/fz/Mkp3/mts/arr/ctp/cg/heph
GO:BP	imaginal disc-derived appendage development	GO:0048737	12/134	345/12175	0.00042023	0.00417189	0.00291018	Pka-C1/pan/dac/Hr51/scrib/fz/Mkp3/arr/ftz-f1/ctp/cg/heph
GO:BP	negative regulation of response to stimulus	GO:0048585	13/134	397/12175	0.000429647	0.00418785	0.00292131	Pka-C1/crb/dlg1/Mkp3/pum/PIP4K/mts/dock/CG7378/Fas2/eIF4A/chrb/Cam
GO:BP	cell-cell junction assembly	GO:0007043	5/134	58/12175	0.000430163	0.00418785	0.00292131	crb/scrib/pyd/dlg1/sdt
GO:BP	regulation of endocytosis	GO:0030100	5/134	58/12175	0.000430163	0.00418785	0.00292131	Pkc53E/scrib/pyd/PIP4K/sdt
GO:BP	establishment of epithelial cell polarity	GO:0090162	3/134	14/12175	0.000434218	0.00420022	0.00292995	scrib/mts/sdt
GO:BP	appendage development	GO:0048736	12/134	347/12175	0.000442597	0.00422684	0.00294851	Pka-C1/pan/dac/Hr51/scrib/fz/Mkp3/arr/ftz-f1/ctp/cg/heph
GO:BP	adherens junction organization	GO:0034332	4/134	33/12175	0.000448174	0.00422684	0.00294851	crb/scrib/pyd/sdt
GO:BP	establishment or maintenance of apical/basal cell polarity	GO:0035088	4/134	33/12175	0.000448174	0.00422684	0.00294851	crb/scrib/dlg1/sdt
GO:BP	establishment or maintenance of bipolar cell polarity	GO:0061245	4/134	33/12175	0.000448174	0.00422684	0.00294851	crb/scrib/dlg1/sdt
GO:BP	regulation of cellular component biogenesis	GO:0044087	11/134	299/12175	0.000459736	0.00430895	0.00300579	dysc/dlg1/slo/fz/CG17816/pum/Jupiter/Fas2/Octbeta1R/cac/Abp1
GO:BP	regulation of behavior	GO:0050795	6/134	90/12175	0.00046414	0.00432338	0.00301585	Dop1R2/Pka-C1/Rdl/Oamb/Tmc/Sh
GO:BP	cellular response to nitrogen compound	GO:1901699	7/134	126/12175	0.000476157	0.0044081	0.00307496	Dop1R2/Mkp3/PIP4K/mts/dock/Sh/Dop2R
GO:BP	courtship behavior	GO:0007619	6/134	91/12175	0.000492473	0.00453135	0.00316093	Oamb/dlg1/slo/para/Sh/cac
GO:BP	regulation of synaptic plasticity	GO:0048167	4/134	34/12175	0.000503628	0.00460591	0.00321294	Rim/brp/Fas2/Fife
GO:BP	male courtship behavior, veined wing generated song production	GO:0045433	3/134	15/12175	0.000538415	0.00486508	0.00339373	slo/para/cac
GO:BP	positive regulation of axon extension	GO:0045773	3/134	15/12175	0.000538415	0.00486508	0.00339373	Hr51/fz/Abp1
GO:CC	cell junction	GO:0030054	27/128	446/12100	1.09659e-13	2.17125e-11	1.38516e-11	Dop1R2/CG45263/crb/dysc/Rab27/Rdl/scrib/pyd/dlg1/Rim/slo/g/pum/Rgk1/cpx/brp/Fas2/cac/sdt/Ten-a/unc-13/Esyt2/GluClalpha/Abp1/a/Tomosyn/Fife
GO:CC	synapse	GO:0045202	22/128	306/12100	9.2077e-13	9.11563e-11	5.81539e-11	Dop1R2/dysc/Rab27/Rdl/scrib/dlg1/Rim/slo/g/pum/Rgk1/cpx/brp/Fas2/cac/Ten-a/unc-13/Esyt2/GluClalpha/Abp1/Tomosyn/Fife
GO:CC	presynapse	GO:0098793	17/128	170/12100	2.30956e-12	1.52431e-10	9.72448e-11	Dop1R2/Rab27/dlg1/Rim/g/pum/Rgk1/cpx/brp/Fas2/cac/Ten-a/unc-13/Esyt2/Abp1/Tomosyn/Fife
GO:CC	neuron projection	GO:0043005	23/128	453/12100	3.19317e-10	1.58062e-08	1.00837e-08	Pka-C1/crb/dysc/rad/Rdl/Oamb/pyd/dlg1/sNPF/slo/g/DIP-kappa/Tmc/pum/dpr8/cpx/Fas2/unc-13/Lis-1/GluClalpha/dpr6/Abp1/Unc-76
GO:CC	presynaptic active zone	GO:0048786	8/128	30/12100	6.05674e-10	2.39847e-08	1.53012e-08	Rim/cpx/brp/Fas2/cac/Ten-a/unc-13/Fife
GO:CC	neuromuscular junction	GO:0031594	11/128	82/12100	8.91309e-10	2.94132e-08	1.87644e-08	scrib/dlg1/pum/cpx/brp/Fas2/cac/Ten-a/unc-13/Abp1/Tomosyn
GO:CC	plasma membrane region	GO:0098590	18/128	332/12100	1.20217e-08	3.40043e-07	2.16934e-07	crb/Rdl/scrib/pyd/dlg1/slo/DIP-kappa/dpr8/brp/Fas2/cac/sdt/Ten-a/unc-13/dpr6/Abp1/a/Fife
GO:CC	synaptic membrane	GO:0097060	9/128	69/12100	4.14784e-08	1.02659e-06	6.54922e-07	scrib/dlg1/slo/brp/Fas2/Ten-a/unc-13/Abp1/Fife
GO:CC	integral component of plasma membrane	GO:0005887	21/128	496/12100	5.01361e-08	1.10299e-06	7.03664e-07	Dop1R2/CG45263/Elk/Rdl/Oamb/rk/Dh44-R2/fz/DIP-kappa/Tmc/Dh44-R1/KCNQ/dpr8/Octbeta1R/para/Sh/Esyt2/GluClalpha/Dop2R/Octbeta3R/Tsp42En
GO:CC	presynaptic membrane	GO:0042734	6/128	25/12100	1.87103e-07	3.70463e-06	2.3634e-06	dlg1/brp/Fas2/Ten-a/unc-13/Fife
GO:CC	axon	GO:0030424	12/128	237/12100	7.70941e-06	0.000126263	8.05509e-05	rad/pyd/dlg1/sNPF/g/pum/cpx/Fas2/unc-13/Lis-1/Abp1/Unc-76
GO:CC	postsynaptic specialization	GO:0099572	5/128	27/12100	8.20388e-06	0.000126263	8.05509e-05	scrib/dlg1/pum/Fas2/Abp1
GO:CC	cell cortex region	GO:0099738	7/128	70/12100	8.66796e-06	0.000126263	8.05509e-05	dlg1/Rim/brp/sdt/Ten-a/unc-13/Fife
GO:CC	distal axon	GO:0150034	8/128	98/12100	8.92772e-06	0.000126263	8.05509e-05	dlg1/g/pum/cpx/Fas2/unc-13/Lis-1/Abp1
GO:CC	postsynaptic membrane	GO:0045211	6/128	49/12100	1.2003e-05	0.000155487	9.91943e-05	scrib/dlg1/slo/Fas2/unc-13/Abp1
GO:CC	postsynapse	GO:0098794	7/128	74/12100	1.25646e-05	0.000155487	9.91943e-05	scrib/dlg1/slo/pum/Fas2/unc-13/Abp1
GO:CC	cortical cytoskeleton	GO:0030863	5/128	30/12100	1.41181e-05	0.000164434	0.000104902	Rim/brp/Ten-a/Abp1/Fife
GO:CC	exocytic vesicle	GO:0070382	7/128	79/12100	1.93729e-05	0.000213102	0.00013595	Dop1R2/Rab27/Rim/Sytalpha/unc-13/Esyt2/Tomosyn
GO:CC	cell cortex	GO:0005938	10/128	180/12100	2.0606e-05	0.000214736	0.000136993	scrib/dlg1/Rim/brp/sdt/Ten-a/unc-13/Lis-1/Abp1/Fife
GO:CC	apicolateral plasma membrane	GO:0016327	4/128	20/12100	5.07645e-05	0.000502569	0.000320618	crb/scrib/dlg1/sdt
GO:CC	terminal bouton	GO:0043195	6/128	66/12100	6.73451e-05	0.000634968	0.000405084	dlg1/g/pum/cpx/unc-13/Abp1
GO:CC	secretory vesicle	GO:0099503	7/128	97/12100	7.33581e-05	0.000660223	0.000421195	Dop1R2/Rab27/Rim/Sytalpha/unc-13/Esyt2/Tomosyn
GO:CC	transport vesicle	GO:0030133	7/128	102/12100	0.000100951	0.00086906	0.000554424	Dop1R2/Rab27/Rim/Sytalpha/unc-13/Esyt2/Tomosyn
GO:CC	axon terminus	GO:0043679	6/128	72/12100	0.000109969	0.000907246	0.000578785	dlg1/g/pum/cpx/unc-13/Abp1
GO:CC	neuron projection terminus	GO:0044306	6/128	73/12100	0.00011879	0.000940813	0.0006002	dlg1/g/pum/cpx/unc-13/Abp1
GO:CC	synaptic vesicle	GO:0008021	6/128	74/12100	0.000128162	0.000963827	0.000614882	Dop1R2/Rab27/Rim/unc-13/Esyt2/Tomosyn
GO:CC	voltage-gated potassium channel complex	GO:0008076	3/128	10/12100	0.000131431	0.000963827	0.000614882	Elk/KCNQ/Sh
GO:CC	type I terminal bouton	GO:0061174	4/128	26/12100	0.000149129	0.00105456	0.000672763	dlg1/pum/cpx/Abp1
GO:CC	cation channel complex	GO:0034703	5/128	51/12100	0.000194856	0.0013304	0.000848739	Elk/KCNQ/para/Sh/cac
GO:CC	cytoplasmic region	GO:0099568	8/128	153/12100	0.000216078	0.00142612	0.000909803	dlg1/Rim/pum/brp/sdt/Ten-a/unc-13/Fife
GO:CC	potassium channel complex	GO:0034705	3/128	12/12100	0.000237249	0.00151533	0.00096672	Elk/KCNQ/Sh
GO:CC	cell leading edge	GO:0031252	7/128	118/12100	0.000250677	0.00155107	0.000989516	Rdl/dlg1/DIP-kappa/dpr8/Fas2/dpr6/Abp1
GO:CC	cell-cell junction	GO:0005911	7/128	119/12100	0.000264034	0.0015842	0.00101066	CG45263/crb/scrib/pyd/dlg1/sdt/a
GO:CC	plasma membrane protein complex	GO:0098797	8/128	160/12100	0.000293026	0.00163775	0.00104481	Elk/crb/KCNQ/arr/para/Sh/cac/sdt
GO:CC	postsynaptic density	GO:0014069	3/128	13/12100	0.000306044	0.00163775	0.00104481	scrib/dlg1/Abp1
GO:CC	asymmetric synapse	GO:0032279	3/128	13/12100	0.000306044	0.00163775	0.00104481	scrib/dlg1/Abp1
GO:CC	neuron to neuron synapse	GO:0098984	3/128	13/12100	0.000306044	0.00163775	0.00104481	scrib/dlg1/Abp1
GO:CC	leading edge membrane	GO:0031256	6/128	90/12100	0.000375353	0.00195579	0.00124771	Rdl/dlg1/DIP-kappa/dpr8/Fas2/dpr6
GO:CC	somatodendritic compartment	GO:0036477	10/128	267/12100	0.000533354	0.0027078	0.00172746	Pka-C1/rad/Rdl/Oamb/sNPF/slo/Tmc/Ten-a/Lis-1/Abp1
GO:CC	basolateral plasma membrane	GO:0016323	4/128	38/12100	0.000667556	0.0033044	0.00210807	scrib/pyd/dlg1/cac
GO:CC	ion channel complex	GO:0034702	5/128	68/12100	0.000749313	0.00361863	0.00230854	Elk/KCNQ/para/Sh/cac
GO:CC	anchoring junction	GO:0070161	7/128	152/12100	0.00114361	0.00539133	0.00343944	CG45263/crb/scrib/pyd/dlg1/sdt/a
GO:CC	ciliary transition zone	GO:0035869	3/128	22/12100	0.00153718	0.0070782	0.0045156	crb/dysc/TMEM216
GO:CC	cell body	GO:0044297	7/128	162/12100	0.00165235	0.00743558	0.00474359	Pka-C1/rad/Rdl/sNPF/slo/Ten-a/Lis-1
GO:CC	basal plasma membrane	GO:0009925	4/128	51/12100	0.0020331	0.00875117	0.00558288	scrib/pyd/dlg1/cac
GO:CC	apical junction complex	GO:0043296	4/128	51/12100	0.0020331	0.00875117	0.00558288	crb/scrib/dlg1/sdt
GO:CC	apical part of cell	GO:0045177	7/128	172/12100	0.00232228	0.00978321	0.00624128	crb/pyd/dlg1/Fas2/cac/sdt/a
GO:CC	apical plasma membrane	GO:0016324	5/128	88/12100	0.00238096	0.00982146	0.00626568	crb/Fas2/cac/sdt/a
GO:CC	cytoplasmic vesicle	GO:0031410	12/128	443/12100	0.00254822	0.010091	0.00643761	Dop1R2/Rab27/Rim/g/fz/Sytalpha/PIP4K/arr/dock/unc-13/Esyt2/Tomosyn
GO:CC	intracellular vesicle	GO:0097708	12/128	443/12100	0.00254822	0.010091	0.00643761	Dop1R2/Rab27/Rim/g/fz/Sytalpha/PIP4K/arr/dock/unc-13/Esyt2/Tomosyn
GO:CC	growth cone	GO:0030426	3/128	27/12100	0.00280933	0.0109068	0.00695809	Fas2/Lis-1/Abp1
GO:CC	site of polarized growth	GO:0030427	3/128	29/12100	0.00345593	0.0131591	0.00839498	Fas2/Lis-1/Abp1
GO:CC	septate junction	GO:0005918	3/128	32/12100	0.00458428	0.0171262	0.0109258	scrib/dlg1/sdt
GO:CC	neuronal cell body	GO:0043025	6/128	149/12100	0.00499498	0.0183149	0.0116842	rad/Rdl/sNPF/slo/Ten-a/Lis-1
GO:CC	vesicle	GO:0031982	12/128	488/12100	0.00552625	0.0198945	0.0126919	Dop1R2/Rab27/Rim/g/fz/Sytalpha/PIP4K/arr/dock/unc-13/Esyt2/Tomosyn
GO:CC	subapical complex	GO:0035003	2/128	11/12100	0.00573716	0.020285	0.012941	crb/sdt
GO:CC	centriole	GO:0005814	3/128	36/12100	0.00639981	0.0218476	0.0139379	mts/ctp/Cam
GO:CC	tight junction	GO:0070160	3/128	36/12100	0.00639981	0.0218476	0.0139379	scrib/dlg1/sdt
GO:CC	basal part of cell	GO:0045178	4/128	71/12100	0.00672313	0.0225624	0.0143939	scrib/pyd/dlg1/cac
GO:CC	muscle cell postsynaptic specialization	GO:0097482	2/128	12/12100	0.00683714	0.0225626	0.014394	pum/Fas2
GO:CC	adherens junction	GO:0005912	3/128	43/12100	0.0104851	0.0340335	0.021712	scrib/pyd/a
GO:CC	synaptic vesicle membrane	GO:0030672	2/128	16/12100	0.0120927	0.0380056	0.024246	Dop1R2/unc-13
GO:CC	non-motile cilium	GO:0097730	2/128	16/12100	0.0120927	0.0380056	0.024246	crb/dysc
GO:CC	neuron projection membrane	GO:0032589	4/128	86/12100	0.0130225	0.0402884	0.0257023	Rdl/DIP-kappa/dpr8/dpr6
GO:CC	exocytic vesicle membrane	GO:0099501	2/128	17/12100	0.013611	0.0414611	0.0264505	Dop1R2/unc-13
GO:CC	lateral plasma membrane	GO:0016328	2/128	18/12100	0.0152073	0.045622	0.029105	scrib/dlg1
GO:CC	nucleoplasm	GO:0005654	11/128	496/12100	0.0160085	0.0473086	0.0301809	glec/Bacc/mei-P26/mts/Ptip/lola/CG7379/lark/sbr/Dek/Cam
GO:CC	postsynapse of neuromuscular junction	GO:0098975	2/128	19/12100	0.01688	0.0491506	0.031356	pum/Fas2

## Sheet: Cluster5
source	term_name	term_id	GeneRatio	BgRatio	pvalue	p.adjust	qvalue	geneID
GO:MF	calmodulin binding	GO:0005516	4/90	40/12049	0.000216601	0.0470024	0.0414962	rdgC/igl/Pde1c/CanB
GO:BP	axonogenesis	GO:0007409	15/93	325/12175	2.14608e-08	1.7798e-05	1.37731e-05	ab/fru/rut/dnc/kuz/Smox/chic/Sema1a/Mical/comm/tsr/trio/Galphaq/ap/Toll-7
GO:BP	axon development	GO:0061564	15/93	338/12175	3.61493e-08	1.7798e-05	1.37731e-05	ab/fru/rut/dnc/kuz/Smox/chic/Sema1a/Mical/comm/tsr/trio/Galphaq/ap/Toll-7
GO:BP	taxis	GO:0042330	15/93	341/12175	4.06348e-08	1.7798e-05	1.37731e-05	ab/fru/kuz/Smox/chic/rdgC/rdgA/Sema1a/Mical/comm/trio/Galphaq/ap/Toll-7/CG34353
GO:BP	neuron projection development	GO:0031175	17/93	474/12175	9.11875e-08	2.70466e-05	2.09301e-05	ab/fru/rut/dnc/kuz/Smox/chic/Sema1a/cv-c/Mical/stai/comm/tsr/trio/Galphaq/ap/Toll-7
GO:BP	cell morphogenesis involved in differentiation	GO:0000904	17/93	478/12175	1.02917e-07	2.70466e-05	2.09301e-05	ab/fru/rut/dnc/kuz/Smox/chic/Sema1a/cv-c/Mical/comm/Ppcs/tsr/trio/Galphaq/ap/Toll-7
GO:BP	cell morphogenesis involved in neuron differentiation	GO:0048667	16/93	434/12175	1.57774e-07	2.86374e-05	2.21611e-05	ab/fru/rut/dnc/kuz/Smox/chic/Sema1a/cv-c/Mical/comm/tsr/trio/Galphaq/ap/Toll-7
GO:BP	neuron projection morphogenesis	GO:0048812	16/93	439/12175	1.84398e-07	2.86374e-05	2.21611e-05	ab/fru/rut/dnc/kuz/Smox/chic/Sema1a/cv-c/Mical/comm/tsr/trio/Galphaq/ap/Toll-7
GO:BP	cell projection morphogenesis	GO:0048858	16/93	441/12175	1.96147e-07	2.86374e-05	2.21611e-05	ab/fru/rut/dnc/kuz/Smox/chic/Sema1a/cv-c/Mical/comm/tsr/trio/Galphaq/ap/Toll-7
GO:BP	plasma membrane bounded cell projection morphogenesis	GO:0120039	16/93	441/12175	1.96147e-07	2.86374e-05	2.21611e-05	ab/fru/rut/dnc/kuz/Smox/chic/Sema1a/cv-c/Mical/comm/tsr/trio/Galphaq/ap/Toll-7
GO:BP	cell part morphogenesis	GO:0032990	16/93	449/12175	2.5027e-07	3.28854e-05	2.54485e-05	ab/fru/rut/dnc/kuz/Smox/chic/Sema1a/cv-c/Mical/comm/tsr/trio/Galphaq/ap/Toll-7
GO:BP	axon guidance	GO:0007411	12/93	260/12175	6.26691e-07	7.48611e-05	5.79315e-05	ab/fru/kuz/Smox/chic/Sema1a/Mical/comm/trio/Galphaq/ap/Toll-7
GO:BP	neuron projection guidance	GO:0097485	12/93	268/12175	8.64507e-07	9.46635e-05	7.32556e-05	ab/fru/kuz/Smox/chic/Sema1a/Mical/comm/trio/Galphaq/ap/Toll-7
GO:BP	chemotaxis	GO:0006935	12/93	277/12175	1.22508e-06	0.000118438	9.16534e-05	ab/fru/kuz/Smox/chic/Sema1a/Mical/comm/trio/Galphaq/ap/Toll-7
GO:BP	G protein-coupled receptor signaling pathway	GO:0007186	11/93	230/12175	1.3458e-06	0.000118438	9.16534e-05	hec/rut/Lgr3/dnc/Ggamma30A/rdgC/rdgA/DopEcR/Galphaq/Gbeta13F/mGluR
GO:BP	axon choice point recognition	GO:0016198	5/93	26/12175	1.35203e-06	0.000118438	9.16534e-05	ab/fru/Sema1a/comm/Galphaq
GO:BP	response to oxygen-containing compound	GO:1901700	13/93	354/12175	2.70577e-06	0.000222211	0.000171959	Pka-R1/Bx/rut/dnc/Smox/Ggamma30A/DopEcR/Galphaq/Hr38/CycG/rl/HDAC4/wdb
GO:BP	adenylate cyclase-modulating G protein-coupled receptor signaling pathway	GO:0007188	6/93	61/12175	6.68427e-06	0.000516655	0.000399815	hec/rut/Lgr3/dnc/DopEcR/Galphaq
GO:BP	cellular response to oxygen-containing compound	GO:1901701	9/93	192/12175	1.5364e-05	0.00112157	0.00086793	Smox/Ggamma30A/DopEcR/Galphaq/Hr38/CycG/rl/HDAC4/wdb
GO:BP	chemical synaptic transmission	GO:0007268	11/93	314/12175	2.61258e-05	0.00171647	0.00132829	Pka-R1/rut/dnc/nAChRalpha6/cv-c/Nlg3/Galphaq/rl/CanB/mGluR/pAbp
GO:BP	anterograde trans-synaptic signaling	GO:0098916	11/93	314/12175	2.61258e-05	0.00171647	0.00132829	Pka-R1/rut/dnc/nAChRalpha6/cv-c/Nlg3/Galphaq/rl/CanB/mGluR/pAbp
GO:BP	trans-synaptic signaling	GO:0099537	11/93	316/12175	2.76993e-05	0.00173319	0.00134123	Pka-R1/rut/dnc/nAChRalpha6/cv-c/Nlg3/Galphaq/rl/CanB/mGluR/pAbp
GO:BP	synaptic signaling	GO:0099536	11/93	324/12175	3.48429e-05	0.0020391	0.00157796	Pka-R1/rut/dnc/nAChRalpha6/cv-c/Nlg3/Galphaq/rl/CanB/mGluR/pAbp
GO:BP	axon midline choice point recognition	GO:0016199	4/93	25/12175	3.56919e-05	0.0020391	0.00157796	fru/Sema1a/comm/Galphaq
GO:BP	axon extension	GO:0048675	5/93	50/12175	3.76875e-05	0.00206339	0.00159676	rut/dnc/kuz/chic/Sema1a
GO:BP	neuron projection extension	GO:1990138	5/93	53/12175	5.0132e-05	0.00263494	0.00203905	rut/dnc/kuz/chic/Sema1a
GO:BP	central nervous system development	GO:0007417	10/93	284/12175	5.96628e-05	0.00299893	0.00232073	ab/fru/kuz/Smox/chic/mbf1/tsr/trio/danr/ap
GO:BP	imaginal disc-derived appendage development	GO:0048737	11/93	345/12175	6.16219e-05	0.00299893	0.00232073	Pka-C3/Bx/Smox/cv-c/CG43658/Ppcs/tsr/trx/rl/danr/ap
GO:BP	appendage development	GO:0048736	11/93	347/12175	6.49127e-05	0.003026	0.00234168	Pka-C3/Bx/Smox/cv-c/CG43658/Ppcs/tsr/trx/rl/danr/ap
GO:BP	courtship behavior	GO:0007619	6/93	91/12175	6.67839e-05	0.003026	0.00234168	hec/fru/rut/dnc/fipi/mGluR
GO:BP	regulation of G protein-coupled receptor signaling pathway	GO:0008277	4/93	31/12175	8.57204e-05	0.00368146	0.00284891	dnc/rdgC/rdgA/Galphaq
GO:BP	mating behavior	GO:0007617	7/93	138/12175	8.68534e-05	0.00368146	0.00284891	hec/fru/rut/dnc/fipi/Pde1c/mGluR
GO:BP	synapse organization	GO:0050808	10/93	299/12175	9.16359e-05	0.0037628	0.00291185	rut/dpr12/Sema1a/Nlg3/Mical/stai/comm/trio/dpr10/mGluR
GO:BP	response to endogenous stimulus	GO:0009719	9/93	249/12175	0.000116769	0.00464955	0.00359806	Lgr3/Smox/trio/Galphaq/Hr38/CycG/rl/HDAC4/wdb
GO:BP	reproductive behavior	GO:0019098	7/93	150/12175	0.000146404	0.00565807	0.00437851	hec/fru/rut/dnc/fipi/Pde1c/mGluR
GO:BP	learning	GO:0007612	5/93	69/12175	0.00017834	0.00669541	0.00518126	Pka-R1/rut/dnc/DopEcR/mGluR
GO:BP	Rho protein signal transduction	GO:0007266	4/93	38/12175	0.000193047	0.00704621	0.00545272	RhoGDI/cv-c/CG43658/trio
GO:BP	mating	GO:0007618	7/93	159/12175	0.00020995	0.00729068	0.00564191	hec/fru/rut/dnc/fipi/Pde1c/mGluR
GO:BP	neuron recognition	GO:0008038	6/93	112/12175	0.000210842	0.00729068	0.00564191	ab/fru/dpr12/Sema1a/comm/Galphaq
GO:BP	dendrite morphogenesis	GO:0048813	7/93	160/12175	0.000218206	0.00735186	0.00568925	ab/fru/Smox/Sema1a/cv-c/Mical/comm
GO:BP	assembly of actomyosin apparatus involved in cytokinesis	GO:0000912	3/93	16/12175	0.000224834	0.0073858	0.00571552	chic/cv-c/tsr
GO:BP	imaginal disc-derived appendage morphogenesis	GO:0035114	10/93	338/12175	0.000249116	0.0077556	0.00600169	Pka-C3/Bx/Smox/cv-c/CG43658/Ppcs/tsr/rl/danr/ap
GO:BP	appendage morphogenesis	GO:0035107	10/93	339/12175	0.000255089	0.0077556	0.00600169	Pka-C3/Bx/Smox/cv-c/CG43658/Ppcs/tsr/rl/danr/ap
GO:BP	developmental cell growth	GO:0048588	5/93	75/12175	0.000264201	0.0077556	0.00600169	rut/dnc/kuz/chic/Sema1a
GO:BP	cell recognition	GO:0008037	6/93	117/12175	0.00026735	0.0077556	0.00600169	ab/fru/dpr12/Sema1a/comm/Galphaq
GO:BP	deactivation of rhodopsin mediated signaling	GO:0016059	3/93	17/12175	0.000271505	0.0077556	0.00600169	rdgC/rdgA/Galphaq
GO:BP	thermotaxis	GO:0043052	3/93	17/12175	0.000271505	0.0077556	0.00600169	rdgC/rdgA/Galphaq
GO:BP	cellular response to hormone stimulus	GO:0032870	6/93	118/12175	0.00027996	0.00782695	0.00605691	Lgr3/Hr38/CycG/rl/HDAC4/wdb
GO:BP	adenylate cyclase-activating G protein-coupled receptor signaling pathway	GO:0007189	4/93	42/12175	0.000285982	0.00782876	0.0060583	rut/Lgr3/dnc/DopEcR
GO:BP	regulation of rhodopsin mediated signaling pathway	GO:0022400	3/93	18/12175	0.000324007	0.00851491	0.00658928	rdgC/rdgA/Galphaq
GO:BP	cellular response to inorganic substance	GO:0071241	3/93	18/12175	0.000324007	0.00851491	0.00658928	Ggamma30A/Galphaq/rl
GO:BP	cellular response to organonitrogen compound	GO:0071417	6/93	122/12175	0.000335146	0.00857557	0.00663623	Galphaq/Hr38/CycG/rl/HDAC4/wdb
GO:BP	dendrite development	GO:0016358	7/93	172/12175	0.000339368	0.00857557	0.00663623	ab/fru/Smox/Sema1a/cv-c/Mical/comm
GO:BP	cellular response to organic substance	GO:0071310	10/93	354/12175	0.000360178	0.0089297	0.00691027	Lgr3/Smox/Hsp70Bb/DopEcR/Galphaq/Hr38/CycG/rl/HDAC4/wdb
GO:BP	response to hormone	GO:0009725	6/93	125/12175	0.000381866	0.00929207	0.00719069	Lgr3/Hr38/CycG/rl/HDAC4/wdb
GO:BP	cellular response to nitrogen compound	GO:1901699	6/93	126/12175	0.000398522	0.00946985	0.00732827	Galphaq/Hr38/CycG/rl/HDAC4/wdb
GO:BP	regulation of anatomical structure morphogenesis	GO:0022603	7/93	177/12175	0.000403586	0.00946985	0.00732827	Bx/chic/Sema1a/cv-c/trio/rl/Gbeta13F
GO:BP	growth	GO:0040007	11/93	429/12175	0.00041353	0.00953296	0.00737711	rut/Lgr3/dnc/kuz/Smox/chic/Sema1a/stai/trio/CycG/CG10508
GO:BP	male mating behavior	GO:0060179	5/93	83/12175	0.00042364	0.00959765	0.00742716	hec/fru/fipi/Pde1c/mGluR
GO:BP	developmental growth	GO:0048589	10/93	366/12175	0.00046836	0.0104309	0.00807201	rut/Lgr3/dnc/kuz/Smox/chic/Sema1a/stai/trio/CG10508
GO:BP	cell junction organization	GO:0034330	10/93	367/12175	0.000478481	0.0104787	0.008109	rut/dpr12/Sema1a/Nlg3/Mical/stai/comm/trio/dpr10/mGluR
GO:BP	cellular response to endogenous stimulus	GO:0071495	8/93	241/12175	0.00050222	0.0108183	0.00837177	Lgr3/Smox/Galphaq/Hr38/CycG/rl/HDAC4/wdb
GO:BP	response to temperature stimulus	GO:0009266	6/93	132/12175	0.000510752	0.0108246	0.00837667	rut/dnc/Hsp70Bb/rdgC/rdgA/Galphaq
GO:BP	regulation of Rho protein signal transduction	GO:0035023	3/93	21/12175	0.000519406	0.0108333	0.00838339	cv-c/CG43658/trio
GO:BP	cellular response to peptide hormone stimulus	GO:0071375	5/93	88/12175	0.00055475	0.0112145	0.00867836	Hr38/CycG/rl/HDAC4/wdb
GO:BP	cellular response to peptide	GO:1901653	5/93	88/12175	0.00055475	0.0112145	0.00867836	Hr38/CycG/rl/HDAC4/wdb
GO:BP	actin cytoskeleton organization	GO:0030036	9/93	308/12175	0.000563697	0.0112227	0.00868471	Pka-R1/chic/cv-c/Mical/CG43658/Ppcs/tsr/trio/Gbeta13F
GO:BP	response to organonitrogen compound	GO:0010243	7/93	190/12175	0.000616913	0.0120989	0.00936274	Bx/Galphaq/Hr38/CycG/rl/HDAC4/wdb
GO:BP	cell migration	GO:0016477	9/93	313/12175	0.000632826	0.0122284	0.00946301	ab/kuz/Sema1a/stai/mim/tsr/trx/Gbeta13F/CG10508
GO:BP	regulation of plasma membrane bounded cell projection organization	GO:0120035	6/93	139/12175	0.000671259	0.0124834	0.00966034	chic/Sema1a/cv-c/comm/tsr/trio
GO:BP	rhodopsin mediated signaling pathway	GO:0016056	3/93	23/12175	0.000684024	0.0124834	0.00966034	rdgC/rdgA/Galphaq
GO:BP	appendage segmentation	GO:0035285	3/93	23/12175	0.000684024	0.0124834	0.00966034	Bx/tsr/ap
GO:BP	imaginal disc-derived leg segmentation	GO:0036011	3/93	23/12175	0.000684024	0.0124834	0.00966034	Bx/tsr/ap
GO:BP	leg disc development	GO:0035218	5/93	93/12175	0.000714245	0.0125136	0.00968366	Bx/CG43658/tsr/rl/ap
GO:BP	response to peptide hormone	GO:0043434	5/93	93/12175	0.000714245	0.0125136	0.00968366	Hr38/CycG/rl/HDAC4/wdb
GO:BP	response to peptide	GO:1901652	5/93	93/12175	0.000714245	0.0125136	0.00968366	Hr38/CycG/rl/HDAC4/wdb
GO:BP	response to nitrogen compound	GO:1901698	7/93	196/12175	0.000741649	0.0127638	0.0098773	Bx/Galphaq/Hr38/CycG/rl/HDAC4/wdb
GO:BP	developmental growth involved in morphogenesis	GO:0060560	5/93	94/12175	0.000749871	0.0127638	0.0098773	rut/dnc/kuz/chic/Sema1a
GO:BP	actin filament-based process	GO:0030029	9/93	322/12175	0.000774745	0.0127638	0.0098773	Pka-R1/chic/cv-c/Mical/CG43658/Ppcs/tsr/trio/Gbeta13F
GO:BP	cyclic-nucleotide-mediated signaling	GO:0019935	3/93	24/12175	0.000777434	0.0127638	0.0098773	Pka-R1/dnc/Cngl
GO:BP	regulation of cell projection organization	GO:0031344	6/93	143/12175	0.000779088	0.0127638	0.0098773	chic/Sema1a/cv-c/comm/tsr/trio
GO:BP	cytoskeleton-dependent cytokinesis	GO:0061640	5/93	95/12175	0.00078681	0.0127638	0.0098773	chic/cv-c/Act5C/tsr/pAbp
GO:BP	cellular response to chemical stimulus	GO:0070887	11/93	468/12175	0.00085301	0.013669	0.0105778	Lgr3/Smox/Ggamma30A/Hsp70Bb/DopEcR/Galphaq/Hr38/CycG/rl/HDAC4/wdb
GO:BP	post-embryonic appendage morphogenesis	GO:0035120	9/93	327/12175	0.000864201	0.0136814	0.0105874	Pka-C3/Bx/Smox/cv-c/CG43658/Ppcs/tsr/rl/ap
GO:BP	associative learning	GO:0008306	4/93	57/12175	0.000924909	0.0141616	0.010959	Pka-R1/rut/dnc/DopEcR
GO:BP	second-messenger-mediated signaling	GO:0019932	4/93	57/12175	0.000924909	0.0141616	0.010959	Pka-R1/dnc/Cngl/rdgC
GO:BP	regulation of neuron projection development	GO:0010975	5/93	99/12175	0.0009483	0.0141616	0.010959	chic/Sema1a/cv-c/comm/trio
GO:BP	imaginal disc morphogenesis	GO:0007560	10/93	401/12175	0.000948416	0.0141616	0.010959	Pka-C3/Bx/Smox/chic/cv-c/CG43658/Ppcs/tsr/rl/ap
GO:BP	post-embryonic animal organ morphogenesis	GO:0048563	10/93	401/12175	0.000948416	0.0141616	0.010959	Pka-C3/Bx/Smox/chic/cv-c/CG43658/Ppcs/tsr/rl/ap
GO:BP	short-term memory	GO:0007614	3/93	27/12175	0.00110505	0.0163151	0.0126255	rut/dnc/mGluR
GO:BP	supramolecular fiber organization	GO:0097435	8/93	276/12175	0.00121423	0.0174279	0.0134866	Pka-R1/chic/Mical/stai/CG43658/tsr/Gbeta13F/Pxn
GO:BP	regulation of axon extension	GO:0030516	3/93	28/12175	0.00123085	0.0174279	0.0134866	kuz/chic/Sema1a
GO:BP	regulation of extent of cell growth	GO:0061387	3/93	28/12175	0.00123085	0.0174279	0.0134866	kuz/chic/Sema1a
GO:BP	regulation of intracellular signal transduction	GO:1902531	9/93	344/12175	0.00123348	0.0174279	0.0134866	rut/dnc/cv-c/CG43658/trio/DopEcR/CycG/CG10508/wdb
GO:BP	phototransduction, visible light	GO:0007603	3/93	29/12175	0.00136532	0.0190854	0.0147693	rdgC/rdgA/Galphaq
GO:BP	cytokinesis	GO:0000910	5/93	109/12175	0.00145915	0.0201824	0.0156182	chic/cv-c/Act5C/tsr/pAbp
GO:BP	imaginal disc-derived wing morphogenesis	GO:0007476	8/93	286/12175	0.00152271	0.020842	0.0161287	Pka-C3/Bx/Smox/cv-c/Ppcs/tsr/rl/ap
GO:BP	learning or memory	GO:0007611	6/93	165/12175	0.0016315	0.0221009	0.0171028	Pka-R1/rut/dnc/DopEcR/HDAC4/mGluR
GO:BP	maintenance of location in cell	GO:0051651	3/93	31/12175	0.00166113	0.0222727	0.0172358	mago/chic/Act5C
GO:BP	cognition	GO:0050890	6/93	166/12175	0.00168243	0.0223304	0.0172804	Pka-R1/rut/dnc/DopEcR/HDAC4/mGluR
GO:BP	imaginal disc-derived leg morphogenesis	GO:0007480	4/93	68/12175	0.00178895	0.0235068	0.0181908	Bx/CG43658/tsr/ap
GO:BP	synapse assembly	GO:0007416	6/93	169/12175	0.00184249	0.0239706	0.0185497	Sema1a/Nlg3/Mical/stai/comm/trio
GO:BP	regulation of developmental growth	GO:0048638	7/93	230/12175	0.00187369	0.0241375	0.0186789	Lgr3/kuz/Smox/chic/Sema1a/trio/CG10508
GO:BP	response to ethanol	GO:0045471	4/93	70/12175	0.00199092	0.0251987	0.0195001	Pka-R1/rut/dnc/DopEcR
GO:BP	wing disc morphogenesis	GO:0007472	8/93	299/12175	0.0020136	0.0251987	0.0195001	Pka-C3/Bx/Smox/cv-c/Ppcs/tsr/rl/ap
GO:BP	regulation of growth	GO:0040008	8/93	299/12175	0.0020136	0.0251987	0.0195001	Lgr3/kuz/Smox/chic/Sema1a/trio/CycG/CG10508
GO:BP	cell motility	GO:0048870	9/93	371/12175	0.00207414	0.0257115	0.0198969	ab/kuz/Sema1a/stai/mim/tsr/trx/Gbeta13F/CG10508
GO:BP	instar larval or pupal morphogenesis	GO:0048707	10/93	449/12175	0.00220355	0.0266195	0.0205995	Pka-C3/Bx/Smox/chic/cv-c/CG43658/Ppcs/tsr/rl/ap
GO:BP	leg disc morphogenesis	GO:0007478	4/93	72/12175	0.00220816	0.0266195	0.0205995	Bx/CG43658/tsr/ap
GO:BP	insulin receptor signaling pathway	GO:0008286	4/93	72/12175	0.00220816	0.0266195	0.0205995	CycG/rl/HDAC4/wdb
GO:BP	brain development	GO:0007420	5/93	120/12175	0.00222907	0.0266272	0.0206055	ab/Smox/chic/tsr/trio
GO:BP	localization of cell	GO:0051674	9/93	377/12175	0.00231212	0.0273705	0.0211808	ab/kuz/Sema1a/stai/mim/tsr/trx/Gbeta13F/CG10508
GO:BP	detection of visible light	GO:0009584	3/93	35/12175	0.00236599	0.0277582	0.0214807	rdgC/rdgA/Galphaq
GO:BP	tracheal pit formation in open tracheal system	GO:0035202	2/93	10/12175	0.00249607	0.0287705	0.0222641	cv-c/rl
GO:BP	regulation of axon extension involved in axon guidance	GO:0048841	2/93	10/12175	0.00249607	0.0287705	0.0222641	chic/Sema1a
GO:BP	negative regulation of protein phosphorylation	GO:0001933	3/93	36/12175	0.00256692	0.0293298	0.0226969	Pka-R1/kek1/wdb
GO:BP	male courtship behavior	GO:0008049	4/93	76/12175	0.0026907	0.0304427	0.0235582	hec/fru/fipi/mGluR
GO:BP	post-embryonic animal morphogenesis	GO:0009886	10/93	462/12175	0.00271065	0.0304427	0.0235582	Pka-C3/Bx/Smox/chic/cv-c/CG43658/Ppcs/tsr/rl/ap
GO:BP	border follicle cell migration	GO:0007298	5/93	128/12175	0.00295042	0.0328462	0.0254181	ab/kuz/stai/mim/tsr
GO:BP	segmentation	GO:0035282	7/93	250/12175	0.00299277	0.0328462	0.0254181	Bx/mago/chic/tsr/rl/danr/ap
GO:BP	negative regulation of phosphorylation	GO:0042326	3/93	38/12175	0.00299965	0.0328462	0.0254181	Pka-R1/kek1/wdb
GO:BP	ameboidal-type cell migration	GO:0001667	6/93	187/12175	0.00305831	0.0332118	0.025701	ab/kuz/stai/mim/tsr/Gbeta13F
GO:BP	post-embryonic animal organ development	GO:0048569	10/93	471/12175	0.00311375	0.0335366	0.0259524	Pka-C3/Bx/Smox/chic/cv-c/CG43658/Ppcs/tsr/rl/ap
GO:BP	epithelial tube morphogenesis	GO:0060562	10/93	472/12175	0.00316135	0.0337725	0.0261349	Pka-C3/Bx/Smox/chic/cv-c/CG43658/Ppcs/tsr/rl/ap
GO:BP	protein depolymerization	GO:0051261	3/93	39/12175	0.0032318	0.0338013	0.0261572	Mical/stai/tsr
GO:BP	mushroom body development	GO:0016319	4/93	80/12175	0.00324107	0.0338013	0.0261572	ab/Smox/tsr/trio
GO:BP	metamorphosis	GO:0007552	10/93	474/12175	0.00325831	0.0338013	0.0261572	Pka-C3/Bx/Smox/chic/cv-c/CG43658/Ppcs/tsr/rl/ap
GO:BP	negative regulation of response to stimulus	GO:0048585	9/93	397/12175	0.00326694	0.0338013	0.0261572	Pka-R1/dnc/kek1/Sema1a/cv-c/Galphaq/CycG/Gbeta13F/wdb
GO:BP	neuromuscular synaptic transmission	GO:0007274	4/93	81/12175	0.00338979	0.0347983	0.0269287	Pka-R1/rut/cv-c/Galphaq
GO:BP	heart morphogenesis	GO:0003007	3/93	40/12175	0.00347469	0.0353933	0.0273892	kuz/rl/Gbeta13F
GO:BP	regulation of membrane potential	GO:0042391	4/93	82/12175	0.00354308	0.0358124	0.0277135	nAChRalpha6/CG8726/Galphaq/jus
GO:BP	regulation of adult chitin-containing cuticle pigmentation	GO:0048082	2/93	12/12175	0.00362468	0.0363575	0.0281353	mgl/Hr38
GO:BP	ovarian follicle cell migration	GO:0007297	5/93	138/12175	0.00407287	0.0405436	0.0313748	ab/kuz/stai/mim/tsr
GO:BP	cellular response to insulin stimulus	GO:0032869	4/93	86/12175	0.00420343	0.0415287	0.0321371	CycG/rl/HDAC4/wdb
GO:BP	anesthesia-resistant memory	GO:0007615	2/93	13/12175	0.00426249	0.041554	0.0321567	rut/dnc
GO:BP	cytokinetic process	GO:0032506	3/93	43/12175	0.00426925	0.041554	0.0321567	chic/cv-c/tsr
GO:BP	modulation of chemical synaptic transmission	GO:0050804	5/93	141/12175	0.0044621	0.0427971	0.0331186	cv-c/Nlg3/Galphaq/rl/mGluR
GO:BP	regulation of trans-synaptic signaling	GO:0099177	5/93	141/12175	0.0044621	0.0427971	0.0331186	cv-c/Nlg3/Galphaq/rl/mGluR
GO:BP	head development	GO:0060322	5/93	143/12175	0.00473589	0.045094	0.0348961	ab/Smox/chic/tsr/trio
GO:BP	germ cell migration	GO:0008354	3/93	45/12175	0.00485529	0.0454687	0.0351861	stai/mim/trx
GO:BP	establishment or maintenance of cytoskeleton polarity	GO:0030952	3/93	45/12175	0.00485529	0.0454687	0.0351861	Pka-R1/mago/Gbeta13F
GO:BP	negative regulation of signal transduction	GO:0009968	8/93	346/12175	0.00490422	0.0454687	0.0351861	Pka-R1/dnc/kek1/cv-c/Galphaq/CycG/Gbeta13F/wdb
GO:BP	phospholipase C-activating G protein-coupled receptor signaling pathway	GO:0007200	2/93	14/12175	0.00494827	0.0454687	0.0351861	Ggamma30A/Galphaq
GO:BP	regulation of cuticle pigmentation	GO:0048079	2/93	14/12175	0.00494827	0.0454687	0.0351861	mgl/Hr38
GO:BP	response to insulin	GO:0032868	4/93	91/12175	0.00513988	0.0468112	0.0362249	CycG/rl/HDAC4/wdb
GO:BP	olfactory learning	GO:0008355	3/93	46/12175	0.00516561	0.0468112	0.0362249	Pka-R1/rut/dnc
GO:BP	cell growth	GO:0016049	5/93	147/12175	0.00531903	0.0478713	0.0370453	rut/dnc/kuz/chic/Sema1a
GO:BP	regulation of axonogenesis	GO:0050770	3/93	47/12175	0.00548763	0.0484754	0.0375128	chic/Sema1a/trio
GO:BP	actomyosin contractile ring assembly	GO:0000915	2/93	15/12175	0.00568129	0.0484754	0.0375128	chic/tsr
GO:BP	leg disc proximal/distal pattern formation	GO:0007479	2/93	15/12175	0.00568129	0.0484754	0.0375128	rl/ap
GO:BP	positive regulation of Rho protein signal transduction	GO:0035025	2/93	15/12175	0.00568129	0.0484754	0.0375128	CG43658/trio
GO:BP	male courtship behavior, veined wing generated song production	GO:0045433	2/93	15/12175	0.00568129	0.0484754	0.0375128	fru/fipi
GO:BP	cAMP metabolic process	GO:0046058	2/93	15/12175	0.00568129	0.0484754	0.0375128	rut/Pde1c
GO:BP	nonassociative learning	GO:0046958	2/93	15/12175	0.00568129	0.0484754	0.0375128	dnc/DopEcR
GO:BP	adult chitin-containing cuticle pigmentation	GO:0048085	2/93	15/12175	0.00568129	0.0484754	0.0375128	mgl/Hr38
GO:BP	synaptic target recognition	GO:0008039	3/93	48/12175	0.00582147	0.0493511	0.0381904	ab/dpr12/Sema1a
GO:CC	extrinsic component of cytoplasmic side of plasma membrane	GO:0031234	4/89	26/12100	3.61275e-05	0.00535453	0.00464816	Ggamma30A/trio/Galphaq/Gbeta13F
GO:CC	heterotrimeric G-protein complex	GO:0005834	3/89	13/12100	0.000104309	0.00535453	0.00464816	Ggamma30A/Galphaq/Gbeta13F
GO:CC	GTPase complex	GO:1905360	3/89	13/12100	0.000104309	0.00535453	0.00464816	Ggamma30A/Galphaq/Gbeta13F
GO:CC	side of membrane	GO:0098552	5/89	81/12100	0.000317322	0.0118012	0.0102444	Ggamma30A/trio/Galphaq/Gbeta13F/Toll-7
GO:CC	extrinsic component of plasma membrane	GO:0019897	4/89	47/12100	0.000383156	0.0118012	0.0102444	Ggamma30A/trio/Galphaq/Gbeta13F
GO:CC	cytoplasmic side of plasma membrane	GO:0009898	4/89	57/12100	0.000802407	0.0205951	0.0178782	Ggamma30A/trio/Galphaq/Gbeta13F
GO:CC	plasma membrane protein complex	GO:0098797	6/89	160/12100	0.0011451	0.0251923	0.0218689	nAChRalpha6/Ggamma30A/Ca-Ma2d/Galphaq/Gbeta13F/mGluR
GO:CC	cytoplasmic side of membrane	GO:0098562	4/89	65/12100	0.00131526	0.0253187	0.0219786	Ggamma30A/trio/Galphaq/Gbeta13F
GO:CC	ion channel complex	GO:0034702	4/89	68/12100	0.00155583	0.026622	0.02311	nAChRalpha6/Cngl/Ca-Ma2d/Trpm
