# Supplementary material for: A memory transcriptome time course reveals essential long-term memory transcription factors.
Source: Research Square preprint supplement (doi:10.21203/rs.3.rs-5746840/v1), 2025-01-08
Supplement: Supplementary file 8 [file e7896b72619d1ff9f5e4a5f3.xlsx]

## Sheet: 1h-DT MB TIG
	baseMean	log2FoldChange	lfcSE	stat	pvalue	padj
CG13428	538.31	2.93463	0.947275	3.09797	0.0019485	0.0360523
CG31324	3214.7	2.56232	0.148199	17.2897	5.62173e-67	3.95264e-63
phu	842.639	2.38907	0.337107	7.08697	1.37079e-12	5.35447e-10
Kah	422.378	2.20779	0.339907	6.49528	8.28772e-11	2.08111e-08
Act79B	2785.4	2.13469	0.627177	3.40365	0.000664928	0.0159017
Hr38	6533.7	1.86032	0.165968	11.2089	3.68757e-29	1.29636e-25
Dhc93AB	464.088	1.84433	0.674186	2.73564	0.0062259	0.0815163
edl	328.431	1.8039	0.21358	8.44599	3.01469e-17	2.11963e-14
CG7720	5419.39	1.70558	0.261471	6.52304	6.88973e-11	1.79414e-08
CG3630	1054.12	1.61289	0.297624	5.41922	5.98589e-08	6.09953e-06
Thor	1612.55	1.52973	0.194904	7.84865	4.20528e-15	2.27441e-12
CG3348	157.701	1.51623	0.254249	5.96355	2.46822e-09	3.4708e-07
Scp1	2574.58	1.48579	0.419805	3.53923	0.00040129	0.0106527
fit	478.123	1.44262	0.340766	4.23346	2.3012e-05	0.00107765
CG9815	196.518	1.4331	0.223773	6.40427	1.51093e-10	3.12452e-08
CG4461	627.634	1.40164	0.439412	3.18981	0.00142367	0.0284629
dsx	6136.9	1.39393	0.215243	6.4761	9.41267e-11	2.28208e-08
Mmp1	1855.36	1.38897	0.154499	8.99013	2.46931e-19	1.92908e-16
Kr-h1	5145.39	1.36495	0.127884	10.6733	1.35724e-26	3.18091e-23
su(r)	1676.15	1.34215	0.172308	7.78928	6.73929e-15	3.38457e-12
CG9498	1255.59	1.33263	0.143649	9.277	1.74315e-20	2.45122e-17
CG14688	886.55	1.31824	0.189838	6.944	3.81148e-12	1.41045e-09
cwo	7668.58	1.28148	0.13912	9.2113	3.22188e-20	3.77551e-17
Cyp4d21	3573.38	1.27172	0.21874	5.81387	6.10466e-09	7.53016e-07
CG13912	207.673	1.25371	0.233226	5.37554	7.63539e-08	7.49972e-06
CG12344	420.556	1.2528	0.199678	6.27412	3.51606e-10	6.50564e-08
CG15673	606.4	1.24392	0.19764	6.29389	3.09611e-10	5.88344e-08
sosie	574.998	1.23966	0.196866	6.29695	3.03556e-10	5.88344e-08
Sp1	789.405	1.23026	0.322328	3.8168	0.000135193	0.00461429
SmydA-9	214.106	1.22792	0.351668	3.49171	0.000479936	0.0123154
nompC	306.627	1.21331	0.263574	4.60331	4.15829e-06	0.000258734
Act87E	1942.51	1.19254	0.390619	3.05295	0.00226603	0.0400313
sr	2816.41	1.17195	0.128597	9.11336	7.98689e-20	7.01948e-17
CG3339	275.135	1.16802	0.433028	2.69732	0.00698992	0.0872956
tn	2478.04	1.16383	0.282219	4.12388	3.72551e-05	0.00162696
CG11529	182.516	1.16298	0.256492	4.53419	5.78257e-06	0.000332486
PCB	17632.4	1.16282	0.123555	9.41139	4.89617e-21	8.60625e-18
sqa	1477.05	1.15303	0.271334	4.24949	2.14254e-05	0.00102478
ss	417.561	1.15284	0.3116	3.69974	0.000215823	0.00692899
CG9717	661.673	1.14554	0.172325	6.64752	2.98068e-11	8.38287e-09
Lsd-1	4093.53	1.13479	0.176344	6.43512	1.23374e-10	2.69627e-08
CG10345	3313.7	1.13159	0.187772	6.02639	1.67659e-09	2.50811e-07
CG5177	1046.06	1.11419	0.342047	3.25741	0.00112432	0.0237391
plh	758.908	1.11233	0.21444	5.18715	2.13531e-07	1.80884e-05
CG45105	197.35	1.10402	0.370456	2.98016	0.002881	0.0480008
fbl	1927.82	1.09258	0.137906	7.92267	2.32463e-15	1.36204e-12
MFS14	1587.85	1.06933	0.196658	5.43748	5.40407e-08	5.58765e-06
Mp20	2269.33	1.06475	0.297719	3.57636	0.000348417	0.00964456
CG1628	560.073	1.05588	0.196461	5.37449	7.67998e-08	7.49972e-06
FipoQ	283.049	1.05233	0.286806	3.66913	0.000243375	0.00753818
h	2267.75	1.05051	0.177733	5.91057	3.40932e-09	4.43906e-07
CG14401	182.947	1.04959	0.18725	5.60529	2.07912e-08	2.39644e-06
Wnt6	472.848	1.04676	0.20918	5.00412	5.61186e-07	4.2888e-05
MFS9	394.654	1.0456	0.195815	5.33974	9.30813e-08	8.3077e-06
sug	645.407	1.04558	0.221838	4.71326	2.43783e-06	0.000160191
Zasp66	4330.34	1.04155	0.344645	3.02209	0.00251037	0.0433672
Mco1	180.823	1.03806	0.28099	3.69429	0.000220504	0.00701523
CG6145	2390.82	1.01253	0.126489	8.00485	1.1961e-15	7.64526e-13
Tsp42Eh	139.555	1.00991	0.347224	2.90851	0.0036315	0.0557385
CG5023	1001.47	1.00705	0.37289	2.70068	0.0069198	0.0868806
Vha36-3	233.074	1.0061	0.245282	4.10182	4.09911e-05	0.00175737
CG17278	537.884	0.988557	0.218082	4.53295	5.8165e-06	0.000332486
CG6175	900.928	0.985662	0.156587	6.29467	3.08059e-10	5.88344e-08
Neurochondrin	453.274	0.97016	0.32734	2.96377	0.00303893	0.049441
Odc1	418.574	0.968398	0.238435	4.06147	4.87637e-05	0.00204082
Sox15	231.519	0.963787	0.277976	3.46716	0.000525982	0.0132078
Root	544.419	0.953318	0.228001	4.18119	2.89985e-05	0.00131818
Ance-3	1312.16	0.953149	0.138378	6.88802	5.65749e-12	1.90463e-09
CG3036	9081.43	0.941792	0.160304	5.87503	4.22757e-09	5.40437e-07
Sobp	508.053	0.921627	0.172195	5.35222	8.6884e-08	7.93352e-06
Dll	1552.12	0.920211	0.18806	4.89318	9.92174e-07	7.19173e-05
Irk1	309.089	0.917568	0.205047	4.47491	7.64437e-06	0.000419903
Nep7	383.078	0.913189	0.242421	3.76695	0.000165256	0.00548073
DCX-EMAP	1410.31	0.912353	0.183219	4.97959	6.37203e-07	4.81739e-05
CG14661	1907.52	0.912261	0.166584	5.47627	4.34384e-08	4.6987e-06
Prm	4273.39	0.910433	0.307297	2.96271	0.00304939	0.049441
Spn42Dd	708.194	0.901826	0.207254	4.3513	1.35331e-05	0.000692178
Mes2	629.543	0.900921	0.200876	4.48497	7.29238e-06	0.000406926
CG15096	4197.13	0.899263	0.189833	4.73713	2.16766e-06	0.000143781
l(2)01289	2434.01	0.89741	0.267614	3.35338	0.000798319	0.0182833
LKRSDH	1127.34	0.890815	0.138445	6.43441	1.23954e-10	2.69627e-08
CG9436	1282.5	0.875368	0.15714	5.57063	2.53815e-08	2.87834e-06
CG11899	1003.62	0.874872	0.199727	4.38033	1.18499e-05	0.000621767
CG6142	391.381	0.869333	0.168306	5.16518	2.40204e-07	1.98691e-05
daw	1682.99	0.858672	0.220462	3.89487	9.82515e-05	0.00352452
CG5707	592.944	0.856726	0.176263	4.8605	1.17093e-06	8.23278e-05
CG33110	1463.1	0.851191	0.224183	3.79686	0.000146543	0.00490639
CG7530	1688.12	0.85113	0.123581	6.88724	5.68868e-12	1.90463e-09
CG17221	282.755	0.847229	0.163787	5.17275	2.30669e-07	1.93075e-05
CG9626	200.13	0.844849	0.279774	3.01976	0.00252979	0.0435954
cher	4574.58	0.844451	0.156836	5.38428	7.2735e-08	7.30571e-06
CG31689	9192.22	0.83536	0.218144	3.82939	0.000128461	0.00440589
CG8745	1300.99	0.833488	0.121648	6.85166	7.29978e-12	2.33294e-09
bgm	2783.19	0.823784	0.164048	5.02159	5.12454e-07	3.95941e-05
SERCA	34520.4	0.819603	0.283203	2.89404	0.00380316	0.0571368
ple	2233.25	0.816171	0.174021	4.69006	2.7312e-06	0.000176175
CG15528	203.507	0.810033	0.254405	3.18403	0.00145238	0.0289183
Tsp42Ei	254.675	0.807773	0.219868	3.67391	0.00023887	0.00746442
kon	978.266	0.80685	0.123399	6.53854	6.21208e-11	1.67989e-08
Sidpn	600.86	0.80486	0.133217	6.04172	1.52484e-09	2.33069e-07
CG5059	2866.07	0.802216	0.154513	5.1919	2.08153e-07	1.78479e-05
Unc-89	6332.91	0.799124	0.263472	3.03305	0.00242098	0.0421722
NPF	332.755	0.798996	0.226174	3.53267	0.00041139	0.010874
CG4733	783.774	0.790201	0.122869	6.43126	1.2655e-10	2.69627e-08
CG5346	1088.96	0.783098	0.135333	5.78646	7.18851e-09	8.71421e-07
CG9451	407.608	0.782628	0.182928	4.27833	1.88299e-05	0.000919396
Hsp68	592.403	0.779565	0.261679	2.97909	0.00289109	0.0480496
Tre1	164.961	0.774241	0.216275	3.57989	0.000343742	0.00955276
rau	293.602	0.774085	0.175196	4.41839	9.94372e-06	0.000535855
CG5849	269.628	0.773289	0.230317	3.35749	0.000786531	0.0181315
Pkcdelta	1816.35	0.772791	0.272152	2.83956	0.00451762	0.0653567
ELOVL	3386.73	0.765844	0.143017	5.35492	8.55934e-08	7.91851e-06
CG42534	278.573	0.765122	0.208634	3.66729	0.000245132	0.00755932
CG10513	258.235	0.760929	0.259002	2.93793	0.00330411	0.0520879
CG9449	438.251	0.760665	0.197359	3.85423	0.000116096	0.00406106
CG10237	3568.46	0.757485	0.150408	5.03621	4.7485e-07	3.70963e-05
Mlc2	6626.92	0.755264	0.281386	2.68409	0.0072728	0.0892833
CG10126	392.013	0.75389	0.17726	4.25302	2.1091e-05	0.00101569
sls	53261	0.753659	0.280804	2.68393	0.00727625	0.0892833
spin	9899.52	0.753385	0.148279	5.08085	3.75757e-07	3.00221e-05
Nha1	329.4	0.742991	0.207351	3.58325	0.00033935	0.00952838
CG5151	5355.43	0.742353	0.146234	5.07646	3.84526e-07	3.03775e-05
CG14694	185.855	0.73737	0.218269	3.37826	0.000729456	0.0170392
CG32032	400.591	0.731451	0.209784	3.48668	0.000489061	0.0124587
CG4374	715.716	0.726671	0.175653	4.13697	3.51928e-05	0.00155623
Myo31DF	1343.06	0.724669	0.117106	6.18812	6.08873e-10	1.04414e-07
LUBEL	2784.06	0.721332	0.245755	2.93516	0.00333372	0.0524371
CG31121	648.031	0.716397	0.176674	4.05492	5.01513e-05	0.00208647
CG3842	567.755	0.715738	0.162023	4.41752	9.98394e-06	0.000535855
b	1197.15	0.712629	0.181493	3.92648	8.61997e-05	0.00315662
Gpo1	3413.63	0.710203	0.121111	5.86409	4.51604e-09	5.67005e-07
CG42390	2849.57	0.709162	0.19037	3.72517	0.00019518	0.00632402
PRAS40	2230.9	0.707411	0.0915341	7.72838	1.0892e-14	5.10543e-12
blot	2108.69	0.705201	0.103058	6.84275	7.76872e-12	2.37486e-09
CG5909	163.787	0.704826	0.23018	3.06207	0.00219815	0.0396287
CG10348	444.825	0.694467	0.195014	3.56112	0.000369277	0.00998611
CG33970	7070.75	0.692427	0.144129	4.80422	1.55359e-06	0.000106051
CG13315	3178.66	0.691978	0.191991	3.60422	0.000313092	0.00902192
CG33521	1436.96	0.691266	0.250207	2.76278	0.00573114	0.0773429
Strn-Mlck	8159.56	0.680274	0.212559	3.20041	0.00137235	0.0278068
CG43693	1838.71	0.679855	0.124631	5.45495	4.89864e-08	5.21853e-06
Ccdc85	427.112	0.678416	0.176599	3.84156	0.000122254	0.00423183
CG6006	1356.55	0.676296	0.109154	6.19577	5.79991e-10	1.01948e-07
Asph	1119.73	0.676129	0.245037	2.7593	0.00579258	0.0777529
CG5104	183.522	0.673193	0.1957	3.43993	0.000581868	0.0142548
CG10947	2492.11	0.671001	0.128255	5.23176	1.67903e-07	1.45744e-05
Clk	2667.25	0.670408	0.149324	4.48962	7.13514e-06	0.000401337
CG5377	168.459	0.670107	0.223439	2.99906	0.00270817	0.0458317
CG7365	180.637	0.66987	0.248966	2.69061	0.00713218	0.0884339
CG44085	4095.6	0.666558	0.208256	3.20066	0.00137111	0.0278068
CG5599	307.745	0.666544	0.174784	3.81354	0.000136991	0.00462067
egr	512.722	0.666218	0.130552	5.10307	3.34183e-07	2.70073e-05
CG5945	2320.07	0.664961	0.245939	2.70376	0.0068559	0.0866919
Lrt	233.248	0.66172	0.209919	3.15227	0.00162009	0.0317293
CG1673	2362.58	0.659899	0.235157	2.8062	0.00501294	0.0707751
l(3)77CDf	2706.42	0.658289	0.0914684	7.19689	6.15998e-13	2.70693e-10
FASN1	103502	0.658036	0.105576	6.2328	4.58172e-10	8.26001e-08
Irp-1B	2467.19	0.657783	0.136982	4.80198	1.57104e-06	0.000106211
CG10621	1677.41	0.654621	0.219407	2.98359	0.00284886	0.0476912
puc	5026.9	0.654322	0.106001	6.1728	6.70909e-10	1.12313e-07
CG33296	196.643	0.65252	0.221138	2.95074	0.00317016	0.0504285
Ude	368.248	0.651591	0.223976	2.9092	0.00362355	0.0557385
CG5618	2489.25	0.651504	0.134252	4.85285	1.21698e-06	8.47189e-05
CG6972	185.111	0.651339	0.243591	2.67391	0.00749729	0.0915164
CG31103	432.305	0.649801	0.187615	3.46348	0.00053324	0.0132951
insc	365.673	0.646397	0.21147	3.05669	0.00223797	0.0400313
CG5687	1240.39	0.642632	0.157588	4.07793	4.54381e-05	0.00192455
Esp	207.258	0.637136	0.200149	3.18331	0.00145599	0.0289183
Actn	4338.35	0.636265	0.207537	3.06579	0.00217096	0.0392391
wdp	2603.8	0.634274	0.132609	4.78302	1.72677e-06	0.000115628
CG17572	362.059	0.632883	0.218129	2.90141	0.00371482	0.0561845
Pgd	2451.82	0.630543	0.151364	4.16573	3.10353e-05	0.00138987
CG17646	4723.19	0.629711	0.166196	3.78896	0.00015128	0.005041
rgr	794.802	0.625233	0.127895	4.88863	1.01539e-06	7.28493e-05
Picot	2326.57	0.624215	0.0878408	7.10621	1.19273e-12	4.933e-10
fng	1761.15	0.62396	0.125446	4.97394	6.56041e-07	4.90705e-05
CG9812	2538.56	0.623361	0.145689	4.2787	1.87987e-05	0.000919396
CG1674	2324.21	0.620922	0.19398	3.20096	0.00136972	0.0278068
CG10026	458.258	0.618069	0.167127	3.69819	0.000217143	0.0069397
CG12290	1570.94	0.61456	0.107331	5.72584	1.02923e-08	1.22653e-06
Obp56d	3331.51	0.611474	0.185232	3.30112	0.000962987	0.0209621
snu	7502.44	0.609763	0.102042	5.9756	2.29244e-09	3.35794e-07
CG31036	290.505	0.608888	0.225635	2.69855	0.00696433	0.0872837
Fatp3	681.211	0.60404	0.17987	3.3582	0.000784518	0.0181315
Npl4	2598.09	0.600269	0.194464	3.08678	0.00202336	0.0370842
AcCoAS	19108.7	0.599728	0.0973391	6.16123	7.21819e-10	1.18026e-07
Crg-1	329.449	0.594897	0.209677	2.83721	0.00455096	0.0655692
CG6225	411.993	0.594691	0.221328	2.68692	0.00721147	0.0887984
ppl	1013.22	0.592351	0.155269	3.815	0.000136183	0.00462067
r-l	153.486	0.591383	0.215517	2.74402	0.00606916	0.0800991
CG43658	7356.42	0.590964	0.0998816	5.91664	3.28584e-09	4.35901e-07
Grip	521.648	0.588463	0.138013	4.26381	2.0097e-05	0.000974497
CG7888	1291.44	0.586174	0.134739	4.35045	1.35856e-05	0.000692178
CG7900	293.247	0.583885	0.204907	2.84952	0.00437856	0.063653
CG5867	3035.37	0.583345	0.156031	3.73866	0.000185006	0.00605014
Duox	425.459	0.581728	0.16366	3.5545	0.000378703	0.0101628
CG15544	465.05	0.581481	0.132573	4.38613	1.15386e-05	0.000609984
CG13794	496.839	0.580173	0.184973	3.13652	0.00170964	0.0329329
Nep2	904.166	0.57926	0.138555	4.18071	2.90597e-05	0.00131818
CG40006	6368.45	0.578826	0.162451	3.56307	0.000366538	0.00998611
ham	673.442	0.57816	0.134146	4.30995	1.63291e-05	0.000808521
AdamTS-B	652.788	0.575593	0.166966	3.44737	0.000566077	0.0139652
CG9338	610.497	0.574313	0.172958	3.32054	0.000898449	0.0198648
SP1029	1124.32	0.57004	0.0881255	6.46851	9.89769e-11	2.31969e-08
mol	578.414	0.568724	0.143186	3.97192	7.12967e-05	0.00275433
Tep3	658.024	0.568089	0.121221	4.6864	2.78058e-06	0.000177729
AnxB9	3020.91	0.565693	0.115946	4.87893	1.06663e-06	7.57525e-05
Zasp52	7257.34	0.560039	0.180277	3.10654	0.00189288	0.0353959
Hmgs	1517.89	0.55974	0.104835	5.33922	9.33449e-08	8.3077e-06
ort	507.996	0.559152	0.18437	3.03277	0.00242321	0.0421722
CG32694	3105.22	0.555927	0.143256	3.88066	0.000104172	0.00369914
CG4797	601.888	0.555449	0.173245	3.20616	0.00134521	0.0274946
mAcon1	14864.1	0.554074	0.138927	3.98823	6.65685e-05	0.00258587
CG12512	694.385	0.550224	0.150494	3.65612	0.000256065	0.00780577
CG14186	6117.93	0.550145	0.0905775	6.07375	1.24956e-09	1.95237e-07
CG6847	534.495	0.549349	0.151255	3.63193	0.000281306	0.00831035
CG44325	695.599	0.541345	0.124806	4.3375	1.4411e-05	0.000728946
r	1366.07	0.541278	0.129586	4.17698	2.95401e-05	0.00133139
EbpIII	17781.4	0.540585	0.195922	2.75918	0.0057947	0.0777529
CG5973	3667.85	0.540462	0.151937	3.55715	0.000374898	0.0100993
CrebA	2343.03	0.536452	0.135859	3.94859	7.86137e-05	0.00294007
CG5955	579.104	0.535944	0.203411	2.63479	0.00841895	0.0984919
Pmp70	4991.49	0.53486	0.0982023	5.44651	5.13678e-08	5.39055e-06
Fmo-2	1269.51	0.534459	0.170028	3.14336	0.0016702	0.0324397
slow	551.724	0.533611	0.153998	3.46505	0.000530129	0.0132645
pain	1178.34	0.532306	0.132105	4.02941	5.5916e-05	0.00228573
Vha100-2	2449.14	0.531736	0.133134	3.99399	6.49701e-05	0.00255198
Rcd2	376.706	0.528478	0.159681	3.30958	0.000934346	0.0204654
CG11241	728.653	0.525908	0.136937	3.8405	0.000122784	0.00423183
zfh1	2755.55	0.524762	0.12163	4.31441	1.60029e-05	0.000797987
CG15186	1776.69	0.522339	0.117027	4.46342	8.06609e-06	0.000439633
SmydA-7	223.951	0.520423	0.187607	2.774	0.00553711	0.0758223
AdSS	2188.1	0.517966	0.105533	4.9081	9.19629e-07	6.80622e-05
CG3764	3526.2	0.513481	0.0834697	6.15171	7.66524e-10	1.22487e-07
ap	4083.41	0.511766	0.164242	3.11593	0.00183365	0.034564
MME1	271.306	0.510493	0.16363	3.11979	0.00180977	0.0342057
CHKov1	858.931	0.508482	0.127072	4.00152	6.29358e-05	0.00250001
CG14687	1140.4	0.506433	0.15388	3.29108	0.00099804	0.0215914
svp	3842.01	0.505083	0.12838	3.93427	8.34482e-05	0.00307189
CG17111	1765.75	0.504362	0.114312	4.41217	1.02341e-05	0.000545121
htl	550.536	0.503638	0.148615	3.38887	0.000701818	0.0167271
CG41520	4574.13	0.502359	0.157244	3.19478	0.00139937	0.0281919
Gapdh1	7937.45	0.501008	0.15137	3.30983	0.000933542	0.0204654
CG18622	245.676	0.498979	0.188718	2.64404	0.00819232	0.0971336
CG10311	1073.36	0.498508	0.128732	3.87245	0.000107748	0.0038069
bark	1382.69	0.495886	0.113609	4.36487	1.272e-05	0.000660134
Agpat2	417.444	0.494694	0.13874	3.56561	0.000363011	0.00993124
Treh	7050.67	0.490982	0.106808	4.59686	4.28901e-06	0.000264527
CG6701	1785.96	0.48965	0.140271	3.49073	0.000481698	0.0123157
CG6910	7670.87	0.487159	0.162265	3.00225	0.00267992	0.0455133
loco	1293.6	0.485068	0.0875443	5.54083	3.01047e-08	3.35978e-06
D2hgdh	4427.69	0.48448	0.137901	3.51324	0.000442677	0.0114851
Traf4	337.428	0.484293	0.18093	2.67669	0.00743538	0.0909906
ZnT77C	365.734	0.482998	0.114877	4.20449	2.61676e-05	0.00121042
pes	1345	0.482503	0.114008	4.23218	2.3144e-05	0.00107765
Pvr	2571.03	0.474177	0.102965	4.60524	4.11986e-06	0.000258734
Fhos	4218.33	0.472608	0.100536	4.7009	2.59022e-06	0.000168628
CG44245	1389.76	0.471017	0.143328	3.28628	0.0010152	0.0217543
Cdc7	1127.83	0.465292	0.122031	3.81289	0.000137352	0.00462067
CG7920	9723.27	0.463971	0.101357	4.5776	4.70341e-06	0.000285084
pbl	408.853	0.462046	0.175322	2.63542	0.00840329	0.0984725
CG13124	3512.94	0.461425	0.173198	2.66414	0.0077185	0.0930854
SdhA	7016.97	0.461232	0.126049	3.65914	0.000253066	0.00776989
CG8180	1629.03	0.460489	0.105519	4.36403	1.27689e-05	0.000660134
kdn	12179.3	0.458916	0.0953094	4.81501	1.47193e-06	0.000101462
Mrp4	1183.57	0.455106	0.124491	3.65573	0.000256455	0.00780577
CG12814	1598.63	0.454744	0.113089	4.0211	5.79271e-05	0.00234072
Pax	3671.52	0.450793	0.152168	2.96247	0.00305183	0.049441
Ugt302C1	746.004	0.449576	0.151055	2.97624	0.0029181	0.0480496
CG1265	299.163	0.449451	0.147535	3.0464	0.00231602	0.0407099
ITP	1298.52	0.44729	0.156983	2.84929	0.00438174	0.063653
Rh50	1238.86	0.446254	0.124944	3.57165	0.000354739	0.00978106
AnxB10	1304.17	0.445194	0.155765	2.85811	0.00426177	0.0626872
SerT	1073.07	0.445154	0.123746	3.59732	0.000321514	0.00918928
Gli	971.042	0.444959	0.112949	3.93948	8.16569e-05	0.00303772
dnr1	6223.36	0.442922	0.11346	3.90377	9.47041e-05	0.00343506
CG14439	1250.96	0.442207	0.144839	3.0531	0.00226494	0.0400313
raw	5089.13	0.441481	0.0799517	5.52184	3.35459e-08	3.68533e-06
blw	21817.8	0.440684	0.113353	3.8877	0.000101198	0.00361178
foxo	5438.23	0.440107	0.153417	2.86871	0.00412153	0.061136
lbl	524.331	0.439038	0.159427	2.75385	0.00588992	0.0784603
CG8547	3565.21	0.438716	0.157621	2.78336	0.00537992	0.0744392
Argk	31269.6	0.436596	0.117124	3.72763	0.000193287	0.00629168
alpha-Est10	764.038	0.436366	0.130816	3.33573	0.000850764	0.0190501
meng	1933.38	0.436259	0.110887	3.93427	8.34491e-05	0.00307189
CG32547	2163.19	0.436152	0.105686	4.12688	3.67711e-05	0.00161586
CG5080	1100.77	0.436149	0.160735	2.71346	0.00665851	0.0849655
Cpr67B	1907.44	0.436039	0.150842	2.89071	0.00384374	0.0576234
trpl	35531.5	0.434681	0.146095	2.97534	0.00292662	0.0480772
LanB2	1040.14	0.432648	0.146353	2.9562	0.00311459	0.0501114
CG14207	3402.88	0.432173	0.0944823	4.57411	4.78238e-06	0.000287392
Atf3	5821.57	0.431732	0.0945593	4.56573	4.97766e-06	0.0002941
CG8768	279.93	0.431245	0.158616	2.7188	0.00655202	0.0845271
Cyp12a5	360.379	0.430274	0.148432	2.8988	0.00374595	0.0565188
Tsp42Ef	664.886	0.429738	0.12882	3.33597	0.000850033	0.0190501
Gclc	3736.27	0.427148	0.0755326	5.65515	1.55713e-08	1.8247e-06
betaTub97EF	1970.79	0.427096	0.12094	3.53148	0.000413246	0.0108821
CG9005	7061.23	0.426962	0.0715025	5.97129	2.35386e-09	3.37755e-07
CG8520	530.091	0.422398	0.145374	2.9056	0.00366556	0.0559057
fw	692.519	0.42173	0.15507	2.71961	0.00653591	0.0844742
Gk2	1326.67	0.418884	0.133129	3.14645	0.00165265	0.0321877
CG32091	487.836	0.413838	0.127672	3.24142	0.00118936	0.024888
CG43078	15608.9	0.41262	0.110213	3.74385	0.00018122	0.00597335
CG10512	975.958	0.410989	0.115763	3.55027	0.000384833	0.0102881
sty	5718.5	0.410783	0.100435	4.09004	4.31304e-05	0.00183788
ry	1799.69	0.410704	0.144689	2.83853	0.00453217	0.0654327
Pura	3727.59	0.409626	0.0889544	4.6049	4.1266e-06	0.000258734
cact	5668.75	0.409504	0.0891934	4.59119	4.40732e-06	0.00026946
pot	1531.56	0.409424	0.125888	3.25227	0.00114486	0.0240755
CPT2	776.976	0.407943	0.13516	3.01824	0.00254251	0.0437075
CG4991	474.179	0.406169	0.135266	3.00275	0.00267555	0.0455133
Pgk	3488.04	0.4051	0.116308	3.48301	0.000495816	0.0125851
CG5009	2011.53	0.404365	0.12558	3.21997	0.00128206	0.0262811
CG4928	5458.17	0.404335	0.142767	2.83213	0.00462391	0.0662133
Gpdh1	10888.6	0.404206	0.109997	3.67471	0.000238118	0.00746442
CG32369	5499.23	0.404186	0.100613	4.01725	5.88808e-05	0.00236566
DIP-eta	794.25	0.403799	0.144791	2.78885	0.00528961	0.0733556
CG11073	5779.74	0.402873	0.153155	2.63049	0.00852608	0.0992498
CLIP-190	10478.4	0.401314	0.0886938	4.52472	6.04768e-06	0.000342913
DOR	9192.82	0.398819	0.0938912	4.24767	2.16001e-05	0.00102615
CG15890	375.536	0.397435	0.146319	2.71623	0.00660296	0.0845858
gukh	2469.59	0.395349	0.117943	3.35204	0.000802179	0.0183121
Mtpbeta	2109.03	0.393345	0.108868	3.61305	0.000302622	0.0087923
Hil	1485.14	0.393248	0.126871	3.09959	0.00193786	0.0359501
Proc-R	890.78	0.390738	0.111065	3.51809	0.000434661	0.0113189
Men	16159.1	0.390671	0.0939089	4.16011	3.18095e-05	0.00141552
Pino	7767.53	0.390203	0.114215	3.41639	0.000634584	0.0152278
how	4680.08	0.390008	0.129562	3.01021	0.00261071	0.0447704
CG4199	1448.76	0.389707	0.140503	2.77366	0.00554298	0.0758223
Ets65A	1266.18	0.384834	0.114938	3.34819	0.000813398	0.0184383
Pect	4242.1	0.384701	0.0716767	5.36717	7.99797e-08	7.59915e-06
GILT1	1053.68	0.380665	0.117724	3.23354	0.00122267	0.0254337
Mocs1	719.097	0.380048	0.0973913	3.90228	9.52912e-05	0.00343586
Vha68-2	3150.05	0.3783	0.106892	3.53909	0.000401502	0.0106527
Tab2	1797.79	0.378212	0.128997	2.93195	0.00336842	0.0527469
Vinc	3087.34	0.37666	0.0936603	4.02156	5.78141e-05	0.00234072
MESR3	4887.42	0.376115	0.107365	3.50313	0.00045982	0.0118425
CG17549	4320.09	0.373468	0.132431	2.82011	0.00480077	0.0685042
Cpr	5842.07	0.373156	0.122052	3.05735	0.00223306	0.0400313
ClC-a	3590.86	0.372354	0.121899	3.0546	0.00225359	0.0400313
CG10527	938.424	0.372223	0.124978	2.97832	0.00289838	0.0480496
Pdk1	9749.64	0.371852	0.0624764	5.95189	2.65066e-09	3.65427e-07
Ncc69	4842.56	0.371777	0.109839	3.38474	0.000712451	0.0169231
CG2082	6230.28	0.371669	0.0819145	4.53729	5.6983e-06	0.000331114
if	3731.78	0.37055	0.119459	3.10191	0.00192277	0.0357646
ND-49	3359.73	0.369889	0.101511	3.64384	0.000268596	0.00810514
CG8008	784.74	0.369479	0.125166	2.9519	0.00315825	0.0503529
uif	2572.79	0.368029	0.131861	2.79104	0.00525383	0.0730033
nrv1	3968.7	0.366186	0.105389	3.47462	0.000511578	0.0129385
S6k	3867.18	0.365501	0.0887108	4.12014	3.78635e-05	0.00163324
dl	2957.21	0.364325	0.133958	2.71969	0.00653441	0.0844742
CG5191	2905.55	0.364156	0.0988638	3.68341	0.000230139	0.00728877
Idh	11028.3	0.363707	0.112335	3.23771	0.00120493	0.025139
Sarm	16760	0.360935	0.129997	2.77649	0.00549497	0.0754593
vir-1	9704.19	0.360741	0.116753	3.08979	0.002003	0.0368667
CG33978	2399.97	0.360506	0.132197	2.72704	0.00639053	0.0833615
CG6231	1065.68	0.359642	0.0978407	3.67579	0.000237111	0.00746442
CG10550	1977.5	0.358915	0.107677	3.33324	0.000858414	0.0191297
CG9399	1533.04	0.358813	0.104137	3.44558	0.000569831	0.0140087
AnxB11	1003.23	0.357487	0.103526	3.45311	0.000554155	0.0137192
CG8306	2144.86	0.356078	0.120588	2.95283	0.0031487	0.0503149
CG9837	1607.05	0.353388	0.10453	3.38072	0.000722966	0.0170392
Coq8	689.23	0.350502	0.130333	2.68929	0.00716044	0.0884798
UQCR-C1	7995.15	0.344445	0.107992	3.18955	0.00142497	0.0284629
GlyP	12058.4	0.343825	0.112566	3.05443	0.00225486	0.0400313
ND-75	6300.45	0.343198	0.109807	3.12546	0.00177526	0.0337724
tnc	2492.18	0.340992	0.10816	3.15266	0.0016179	0.0317293
GstD1	3877.77	0.34077	0.114761	2.9694	0.00298387	0.0487897
CG31038	4995.81	0.340639	0.094065	3.62132	0.000293107	0.0085868
SdhB	3366.5	0.339651	0.127077	2.67278	0.00752246	0.0916645
lbk	3143.25	0.339522	0.0850937	3.98997	6.6081e-05	0.0025812
UQCR-C2	5973.6	0.336044	0.126568	2.65504	0.00792997	0.0948225
ATPsynbeta	13763.1	0.335615	0.123817	2.71058	0.00671651	0.0853957
Rgk3	3038.97	0.334624	0.110183	3.03698	0.00238958	0.0418982
stac	888.879	0.333505	0.113476	2.939	0.00329274	0.0520253
AANAT1	4289.68	0.332279	0.080635	4.12078	3.77589e-05	0.00163324
bdl	5041.79	0.331362	0.122305	2.70931	0.00674241	0.0855701
Trxr-1	3140	0.330675	0.117576	2.81244	0.00491676	0.0695629
MsrA	1051.25	0.32887	0.114008	2.88463	0.00391876	0.058623
CG42673	3683.75	0.327143	0.0824397	3.96827	7.23974e-05	0.00276766
Keap1	948.364	0.32651	0.0930394	3.50937	0.000449166	0.0116106
CG6040	3718.43	0.326262	0.105125	3.10355	0.00191212	0.0356608
tup	1677.67	0.323989	0.100619	3.21996	0.0012821	0.0262811
CG2841	3599.19	0.323708	0.0983982	3.28978	0.00100266	0.0216248
shn	9983.37	0.32262	0.0885808	3.6421	0.000270423	0.00812539
baz	4294.34	0.322159	0.113138	2.84748	0.00440668	0.0638832
CG12065	2055.16	0.322063	0.101339	3.17808	0.00148255	0.0292803
CG18135	10365.8	0.320634	0.114806	2.79284	0.00522483	0.0729664
CG2865	3422.65	0.31876	0.114546	2.78282	0.00538893	0.0744392
CG30069	5679.9	0.318015	0.0986532	3.22357	0.00126604	0.026181
Mtpalpha	3247.52	0.315823	0.111997	2.81993	0.00480338	0.0685042
coro	2656.87	0.315272	0.116288	2.71112	0.00670558	0.0853957
CG1648	4825.12	0.312184	0.0871381	3.58263	0.000340154	0.00952838
Tina-1	755.381	0.31104	0.101841	3.05417	0.00225686	0.0400313
Pli	6889.18	0.309728	0.0977797	3.16761	0.00153696	0.0302699
muc	3946.68	0.308189	0.0847074	3.63828	0.00027446	0.00820332
pio	3663.54	0.307894	0.0910252	3.38251	0.000718255	0.0170035
Pde11	7925.14	0.304486	0.104903	2.90255	0.00370135	0.0561845
sbm	5418.1	0.304272	0.0718219	4.23648	2.27054e-05	0.00107142
CG32425	4684.22	0.303628	0.0916817	3.31176	0.000927114	0.0204343
Eaat1	7784.44	0.303013	0.101607	2.98221	0.00286173	0.047793
Edem1	1412.6	0.301921	0.101107	2.98617	0.00282498	0.0475177
Lpin	9523.43	0.301751	0.075477	3.99793	6.39001e-05	0.00252406
Cad86C	1047.93	0.30016	0.109109	2.751	0.00594138	0.0788186
cnc	15381.6	0.299092	0.101563	2.94488	0.00323081	0.0511617
rictor	2638.1	0.297892	0.0902301	3.30147	0.000961792	0.0209621
Sik3	4590.95	0.293562	0.0792662	3.7035	0.000212649	0.00685842
Usp1	3056.04	0.291409	0.08168	3.5677	0.000360134	0.00989103
ATPsyngamma	3774.75	0.290217	0.10944	2.65184	0.00800539	0.0953998
nrv2	4708.47	0.289575	0.0979939	2.95504	0.00312633	0.0501431
CG12746	965.763	0.28745	0.0998928	2.87759	0.00400731	0.0595786
axo	4383.46	0.286838	0.0917843	3.12513	0.00177724	0.0337724
CG5028	3508.08	0.286512	0.0925515	3.0957	0.00196348	0.0362341
Nc73EF	21113.1	0.285959	0.0795471	3.59485	0.000324583	0.00920219
RtGEF	2682.29	0.285129	0.0950855	2.99866	0.00271171	0.0458317
Nuak1	8147.82	0.285	0.0793052	3.59371	0.000326001	0.00920528
Mctp	2582.24	0.282351	0.0699747	4.03504	5.45921e-05	0.00225787
NKCC	2776.44	0.281353	0.103577	2.71636	0.00660037	0.0845858
Fum1	2915.08	0.280811	0.0965685	2.90789	0.00363874	0.0557385
CAP	10154	0.279203	0.0961877	2.90269	0.00369977	0.0561845
CG5214	3749.61	0.274341	0.0917564	2.98989	0.0027908	0.0470555
CG4577	16135.9	0.273213	0.0949473	2.87753	0.00400806	0.0595786
SREBP	7735.18	0.273021	0.0757317	3.60511	0.000312023	0.00902192
CG46385	19923.1	0.271562	0.0972203	2.79327	0.00521785	0.0729664
FER	4042.93	0.271484	0.100509	2.70108	0.00691137	0.0868806
Jra	850.394	0.268963	0.0970636	2.77099	0.00558855	0.0761495
bon	4957.18	0.262909	0.0575386	4.56927	4.89432e-06	0.000291627
Eno	15271	0.261173	0.0897923	2.90863	0.00363013	0.0557385
Lac	2374.41	0.260041	0.0886494	2.93336	0.00335314	0.0526248
CG9674	32975.2	0.258534	0.078436	3.29612	0.000980317	0.0212735
Gdh	9091.24	0.256293	0.0844557	3.03464	0.0024082	0.0421195
Mrtf	4941.03	0.255631	0.0782094	3.26854	0.00108102	0.0228936
SCaMC	6039.65	0.253954	0.0870167	2.91846	0.0035177	0.0548402
CG10737	7470.51	0.251967	0.0935783	2.69258	0.00709019	0.088267
oys	4493.33	0.251504	0.0601074	4.18424	2.86123e-05	0.00131485
Naprt	2686.85	0.251037	0.089626	2.80094	0.00509546	0.0717959
Acsl	15266	0.249074	0.0905708	2.75005	0.00595861	0.0788983
VhaSFD	3740.2	0.245168	0.0794326	3.08649	0.00202537	0.0370842
CG2201	3339.48	0.244558	0.071246	3.43258	0.000597858	0.0145451
PyK	14543.1	0.241772	0.0869787	2.77967	0.00544135	0.0748691
CG11050	2916.75	0.240857	0.0740707	3.25172	0.00114711	0.0240755
Svil	25807.2	0.240521	0.0753061	3.19391	0.0014036	0.0281963
Aldh-III	5309.77	0.238699	0.078867	3.0266	0.0024732	0.0429359
Pfk	6061.59	0.238224	0.0872737	2.72962	0.0063408	0.0828665
TM9SF2	2291.23	0.236163	0.0810745	2.91291	0.00358079	0.0554548
Ttd14	7971.45	0.233529	0.0801369	2.91413	0.00356678	0.0553599
Dp1	8616.21	0.232822	0.0659733	3.52903	0.000417089	0.0109424
Tsp42Ee	2850.42	0.230183	0.0872304	2.6388	0.0083201	0.0979222
aralar1	4207.86	0.2272	0.0801836	2.8335	0.00460417	0.0660651
Mlc-c	1647.27	0.224726	0.08351	2.69101	0.00712362	0.0884339
Nsf2	1053.8	0.224342	0.0848283	2.64466	0.00817738	0.0971203
tacc	6066.06	0.223777	0.082458	2.71383	0.00665093	0.0849655
Diap1	6642.67	0.222569	0.0823962	2.7012	0.00690896	0.0868806
CG1640	7172.68	0.220092	0.0707496	3.11086	0.00186542	0.0349753
fry	12643.3	0.203177	0.076997	2.63876	0.00832094	0.0979222
Nedd4	5725.5	0.202286	0.0632735	3.197	0.00138864	0.0280561
CG5455	4212.1	0.194661	0.0560661	3.47199	0.000516614	0.013019
l(3)05822	2356.99	0.190525	0.0657703	2.89683	0.00376956	0.0567533
svr	9625.78	0.18538	0.0583217	3.17859	0.00147996	0.0292803
Vps13	5324.42	0.182849	0.0519351	3.52073	0.000430365	0.0112487
uzip	4371.55	0.180569	0.0671246	2.69005	0.00714414	0.0884339
bur	2163.79	0.174722	0.0658415	2.65367	0.00796221	0.0950463
bel	7264.14	0.16011	0.0529433	3.02417	0.00249314	0.0431756
CG42672	4595.51	0.156723	0.0593476	2.64077	0.00827189	0.0977473

## Sheet: 1h-DT MB TRG
	baseMean	log2FoldChange	lfcSE	stat	pvalue	padj
dsb	4315.79	-2.20276	0.241076	-9.1372	6.40898e-20	6.43736e-17
CG1979	378.995	-1.88694	0.468117	-4.03093	5.55575e-05	0.00228436
CG5966	1529.32	-1.37175	0.255418	-5.3706	7.84756e-08	7.55838e-06
CG34330	232.731	-1.36043	0.253977	-5.35649	8.48526e-08	7.91851e-06
CAH5	172.98	-1.34684	0.492211	-2.73632	0.00621315	0.0815012
CG8343	9521.68	-1.24714	0.452918	-2.75357	0.00589483	0.0784603
CG10516	949.899	-1.20837	0.203341	-5.94259	2.80561e-09	3.79351e-07
CG18302	361.499	-1.13398	0.214862	-5.27772	1.30801e-07	1.14958e-05
comm3	748.584	-1.12858	0.165141	-6.83407	8.25377e-12	2.41801e-09
CG30431	887.691	-0.975398	0.24616	-3.96245	7.4183e-05	0.00281936
CG16758	12378.9	-0.891189	0.231103	-3.85624	0.000115143	0.00404784
hh	139.558	-0.824724	0.246358	-3.34766	0.000814958	0.0184383
CG8630	234.487	-0.813439	0.30506	-2.66649	0.00766489	0.0925977
Lst	1005.95	-0.800613	0.278133	-2.87852	0.00399545	0.0595786
CG8665	2082.08	-0.799464	0.175735	-4.54925	5.38369e-06	0.00031544
bmm	3377.52	-0.774502	0.151274	-5.11987	3.05743e-07	2.49963e-05
CG13024	674.612	-0.760372	0.169855	-4.47658	7.58465e-06	0.000419903
Ugt35C1	414.964	-0.753822	0.223053	-3.37956	0.000726015	0.0170392
comm2	637.487	-0.742261	0.171712	-4.3227	1.54128e-05	0.000774053
CG31800	144.77	-0.737828	0.236874	-3.11485	0.00184038	0.0345982
CG10904	154.08	-0.725581	0.18346	-3.95498	7.65398e-05	0.00287782
REPTOR-BP	271.423	-0.703698	0.255306	-2.75629	0.00584604	0.0781711
Cyp6a22	392.25	-0.696349	0.207186	-3.36098	0.00077667	0.0180223
CG17272	172.795	-0.691483	0.17011	-4.06491	4.80511e-05	0.00202304
tra	257.298	-0.641796	0.180222	-3.56114	0.000369246	0.00998611
CG43312	218.555	-0.634864	0.234858	-2.70319	0.00686779	0.0866919
CG6770	9056.54	-0.610872	0.19833	-3.08008	0.00206944	0.0376949
Nup133	207.961	-0.587775	0.163499	-3.59498	0.00032442	0.00920219
CG9747	1018.21	-0.572797	0.142928	-4.0076	6.13376e-05	0.00245037
CG4707	289.7	-0.571786	0.158882	-3.5988	0.000319687	0.00917438
CG34376	3172.25	-0.569214	0.170791	-3.3328	0.000859761	0.0191297
thoc7	279.356	-0.557658	0.151837	-3.67275	0.000239959	0.00746526
Nmdmc	1826.44	-0.550771	0.200773	-2.74325	0.00608347	0.0800991
CG34134	906.097	-0.548242	0.207129	-2.64687	0.00812417	0.0966515
ATbp	168.643	-0.544934	0.195233	-2.79119	0.00525139	0.0730033
E(z)	503.968	-0.538633	0.109842	-4.90369	9.40524e-07	6.88836e-05
CG30491	258.517	-0.521994	0.165717	-3.14992	0.00163314	0.0318962
CG31176	1384.38	-0.487022	0.124763	-3.90358	9.47806e-05	0.00343506
CG15602	259.808	-0.485794	0.155266	-3.12879	0.00175529	0.0336279
CG11723	317.617	-0.472317	0.143645	-3.28809	0.00100871	0.0216889
CG1418	269.541	-0.461788	0.165368	-2.79249	0.00523041	0.0729664
Alg2	214.131	-0.447419	0.161554	-2.76948	0.00561463	0.0762094
Ir76a	346.414	-0.441553	0.148599	-2.97144	0.00296407	0.048579
Cfp1	392.377	-0.435561	0.130117	-3.34745	0.000815575	0.0184383
MetRS-m	422.812	-0.433135	0.140381	-3.08542	0.00203264	0.0371207
TH1	402.304	-0.418702	0.115143	-3.63636	0.000276517	0.00820332
CG31365	333.408	-0.417052	0.138855	-3.00351	0.00266881	0.0455133
Nsun2	336.796	-0.407472	0.153228	-2.65925	0.00783156	0.0939654
Taf2	432.741	-0.39947	0.144143	-2.77134	0.00558262	0.0761495
Prp38	287.841	-0.39845	0.147721	-2.69732	0.00699011	0.0872956
SIFaR	1294.21	-0.398163	0.151198	-2.63339	0.00845376	0.0987349
Ptpa	302.226	-0.39741	0.146314	-2.71615	0.0066047	0.0845858
CG14535	1505.28	-0.390167	0.106827	-3.65231	0.000259889	0.00787621
Roe1	410.238	-0.389956	0.124672	-3.12787	0.00176081	0.0336419
Ubc4	778.902	-0.388674	0.116798	-3.32774	0.000875533	0.0194192
CG31300	535.847	-0.386368	0.126335	-3.05827	0.00222616	0.040031
CG2889	529.959	-0.385288	0.105926	-3.63732	0.000275489	0.00820332
CG8336	389.25	-0.383938	0.144574	-2.65564	0.00791573	0.0948134
Paf-AHalpha	426.609	-0.378349	0.141364	-2.67642	0.00744127	0.0909906
CG10654	272.698	-0.373438	0.131666	-2.83625	0.00456464	0.0656318
STUB1	652.444	-0.373308	0.11049	-3.37864	0.000728447	0.0170392
CG32176	605.255	-0.371943	0.113248	-3.28433	0.00102225	0.0217802
Lcch3	555.304	-0.370487	0.123311	-3.00448	0.00266032	0.0455103
Mad1	552.884	-0.369557	0.107955	-3.42326	0.000618755	0.0150016
GC	1031.38	-0.369311	0.11298	-3.26882	0.00107996	0.0228936
CG12219	396.282	-0.368276	0.132477	-2.77992	0.00543724	0.0748691
CG8617	493.454	-0.363443	0.108116	-3.36161	0.000774899	0.0180223
CG6511	512.848	-0.354318	0.128697	-2.75311	0.00590321	0.0784603
alpha-Est8	2732.76	-0.349645	0.122584	-2.85229	0.00434054	0.0634477
Hsp83	16545.6	-0.343341	0.100388	-3.42014	0.000625881	0.0151222
CG3065	776.209	-0.335754	0.113638	-2.95459	0.00313083	0.0501431
CG3726	1947.24	-0.333898	0.101627	-3.28552	0.00101794	0.0217543
sced	751.592	-0.332601	0.118842	-2.79867	0.00513139	0.0721576
CG8301	1311.21	-0.331974	0.11185	-2.96804	0.00299702	0.0488911
CG10077	47650.6	-0.331066	0.091545	-3.61642	0.000298702	0.00871441
CG14431	3709.16	-0.329485	0.121114	-2.72045	0.00651937	0.0844742
DPCoAC	580.486	-0.327391	0.118203	-2.76974	0.00561013	0.0762094
Spps	887.442	-0.326217	0.109333	-2.9837	0.00284783	0.0476912
DnaJ-1	3216.38	-0.32473	0.0843104	-3.8516	0.000117348	0.00408451
Hs3st-B	582.065	-0.322948	0.121031	-2.66831	0.00762331	0.0923475
CG6923	2386.25	-0.318329	0.0888892	-3.58119	0.000342031	0.00954292
SMC5	446.345	-0.315512	0.113963	-2.76855	0.00563062	0.0762792
Golgin104	434.741	-0.311487	0.116593	-2.67157	0.00754963	0.0917617
eIF2Bepsilon	586.481	-0.308258	0.11554	-2.66797	0.00763105	0.0923475
CG3955	767.93	-0.306974	0.116202	-2.64173	0.00824849	0.0976349
CG4887	3904.39	-0.304289	0.0839386	-3.62513	0.000288813	0.00849641
CG8245	694.163	-0.298096	0.109376	-2.72542	0.00642192	0.0834613
CG11317	2109.07	-0.297896	0.0923502	-3.22572	0.00125657	0.0260618
CG12071	3091.16	-0.297361	0.111656	-2.6632	0.00774011	0.0931557
RAF2	705.462	-0.296621	0.103961	-2.85319	0.00432825	0.0633999
Gcn2	905.646	-0.296293	0.0885755	-3.34509	0.000822557	0.0185365
CG8298	580.311	-0.294813	0.108135	-2.72635	0.00640392	0.0833813
CG4660	898.756	-0.291922	0.109632	-2.66274	0.00775083	0.0931557
dpr20	1396.34	-0.290289	0.0984687	-2.94803	0.00319803	0.0507571
Grip84	721.869	-0.286954	0.102031	-2.81241	0.00491719	0.0695629
CG31908	1065.89	-0.28689	0.0835639	-3.43318	0.000596537	0.0145451
Cortactin	1056.37	-0.284074	0.0831132	-3.41791	0.00063104	0.0151947
Pabp2	975.581	-0.283422	0.0929586	-3.04891	0.00229677	0.0404726
px	16636	-0.281489	0.0873544	-3.22238	0.0012713	0.0262127
Syx5	1280.47	-0.279095	0.0908877	-3.07076	0.00213512	0.0386907
CG8924	814.317	-0.276072	0.103349	-2.67127	0.00755654	0.0917617
Sulf1	3542.77	-0.272658	0.0689277	-3.95571	7.63071e-05	0.00287782
kel	1836.27	-0.269374	0.0963959	-2.79445	0.00519878	0.0729593
Rab35	2165.25	-0.265125	0.0844151	-3.14073	0.0016853	0.0326427
not	693.169	-0.26301	0.0917565	-2.86639	0.00415184	0.061456
capu	3692.21	-0.262686	0.0838093	-3.13433	0.00172244	0.0330888
x16	801.066	-0.260756	0.0927084	-2.81264	0.00491361	0.0695629
CG42724	5060.92	-0.259376	0.0985744	-2.63127	0.00850656	0.0991868
Task6	4102.31	-0.254366	0.087672	-2.90133	0.0037158	0.0561845
CG4393	2258.4	-0.252857	0.0809431	-3.12389	0.00178479	0.0338244
Girdin	2141.47	-0.252345	0.0752	-3.35565	0.000791791	0.0181931
CG6791	2375.96	-0.25078	0.0669992	-3.74304	0.000181809	0.00597335
CG1316	2732.22	-0.248076	0.0865817	-2.86523	0.00416708	0.0615519
cass	5221.96	-0.244069	0.0866794	-2.81577	0.0048661	0.0692581
Cul5	916.088	-0.24115	0.0815055	-2.9587	0.00308944	0.0498208
Akap200	4460.5	-0.233423	0.0758206	-3.07862	0.0020796	0.0377822
CG8108	7695.93	-0.232299	0.0811424	-2.86285	0.00419844	0.0618852
Cp190	3128.43	-0.228664	0.0785354	-2.9116	0.00359579	0.0555648
OtopLa	22312.5	-0.220288	0.0799252	-2.75618	0.0058481	0.0781711
CG13784	8741.89	-0.218472	0.0749477	-2.91499	0.00355702	0.0553305
Ars2	2883.64	-0.217162	0.0792174	-2.74134	0.00611887	0.0804146
ADD1	2183.23	-0.214749	0.0777093	-2.76349	0.00571863	0.0773224
Mtor	3023.96	-0.214317	0.0619272	-3.46079	0.000538592	0.0133811
Saf-B	6788.23	-0.212372	0.0788771	-2.69245	0.007093	0.088267
Axn	2036.88	-0.212334	0.0744805	-2.85086	0.00436009	0.0636012
ssx	6380.27	-0.212192	0.0804227	-2.63846	0.00832847	0.0979222
l(3)psg2	1680.76	-0.211821	0.0787987	-2.68813	0.00718535	0.088632
Spt20	2889.53	-0.208713	0.0755695	-2.76187	0.0057471	0.0774096
Galphas	2590.55	-0.206764	0.072372	-2.85696	0.00427722	0.0627832
csw	17810.9	-0.203464	0.0687272	-2.96045	0.00307187	0.0496513
CG8176	4232.33	-0.199253	0.0635147	-3.13712	0.00170615	0.0329329
CG1646	3989.58	-0.195845	0.0721014	-2.71625	0.00660265	0.0845858
promL	5537.65	-0.19461	0.0718603	-2.70817	0.00676544	0.0857078
CG14762	14073.7	-0.191144	0.0696705	-2.74355	0.00607791	0.0800991
rump	2313.56	-0.179907	0.0682471	-2.63611	0.00838618	0.0984361
RhoGAP1A	6636.12	-0.172608	0.0579906	-2.97649	0.00291572	0.0480496
sov	6208.94	-0.159729	0.0549692	-2.9058	0.00366319	0.0559057

## Sheet: 7h-DT MB TIG
	baseMean	log2FoldChange	lfcSE	stat	pvalue	padj
fit	478.123	1.53786	0.346656	4.43627	9.15302e-06	0.000860251
CG5867	3035.37	1.47871	0.15662	9.44143	3.67726e-21	1.19235e-17
Nep7	383.078	1.32212	0.244484	5.40778	6.381e-08	1.14947e-05
CG14277	1260.07	1.3061	0.286006	4.56668	4.95499e-06	0.000486865
Cyp4aa1	937.811	1.27244	0.305709	4.16225	3.15124e-05	0.00220564
CG9498	1255.59	1.21621	0.143326	8.4856	2.14606e-17	2.78344e-14
CG16743	382.514	1.21388	0.255776	4.74589	2.07594e-06	0.000244772
atk	597.306	1.15722	0.20268	5.70957	1.13264e-08	2.4484e-06
CG9436	1282.5	1.08582	0.157224	6.90621	4.97763e-12	2.69e-09
Cpr67B	1907.44	1.06333	0.152088	6.99157	2.71828e-12	1.76281e-09
Hr38	6533.7	1.01722	0.166287	6.11722	9.52243e-10	3.25015e-07
Sardh	515.853	1.00899	0.242771	4.15614	3.23663e-05	0.00223293
Obp56g	1363.54	0.974734	0.308253	3.16213	0.00156621	0.0385592
Tig	2638.26	0.966499	0.23601	4.09515	4.21892e-05	0.00270888
LanB2	1040.14	0.957081	0.145225	6.59031	4.38898e-11	2.03304e-08
CG31324	3214.7	0.953509	0.148372	6.42649	1.30581e-10	5.29261e-08
Obp49a	1800.11	0.909188	0.263289	3.4532	0.000553977	0.0186142
CG8157	211.105	0.879202	0.274279	3.2055	0.00134827	0.0348347
CG3036	9081.43	0.839408	0.160224	5.23896	1.61484e-07	2.61806e-05
MFS9	394.654	0.836298	0.194798	4.29316	1.76151e-05	0.00148356
Elal	606.234	0.824296	0.198745	4.14751	3.36115e-05	0.00226638
CG31523	8195.15	0.821756	0.144179	5.69954	1.2013e-08	2.51305e-06
wat	9187.01	0.805588	0.149932	5.37301	7.74331e-08	1.35717e-05
CG11368	2626.62	0.802075	0.235348	3.40804	0.000654322	0.021323
CG8051	571.222	0.799864	0.227588	3.51453	0.000440535	0.0163918
Nha1	329.4	0.792126	0.207605	3.81553	0.000135889	0.006905
CG7900	293.247	0.776806	0.209386	3.70992	0.000207323	0.00949609
CG9717	661.673	0.77251	0.175128	4.41113	1.02835e-05	0.00093927
CG11550	598.036	0.759464	0.137268	5.53269	3.15355e-08	6.1972e-06
SP1029	1124.32	0.752882	0.0882777	8.52856	1.48183e-17	2.40242e-14
Pisd	2887.08	0.744044	0.146091	5.09302	3.52411e-07	5.19406e-05
Baldspot	6959.4	0.741131	0.113249	6.54425	5.97941e-11	2.5851e-08
hui	451.806	0.730971	0.176327	4.14555	3.38995e-05	0.00226638
PCB	17632.4	0.71354	0.123564	5.77464	7.7119e-09	1.78613e-06
edl	328.431	0.71202	0.213603	3.33338	0.000857989	0.0258793
CG8654	897.115	0.707721	0.186564	3.79345	0.000148568	0.00735778
grk	270.9	0.706511	0.18992	3.72005	0.000199186	0.00929294
CG3823	304.317	0.703473	0.2239	3.14191	0.00167852	0.0403157
CG14661	1907.52	0.701786	0.167511	4.1895	2.79569e-05	0.00200877
sr	2816.41	0.687752	0.129099	5.32733	9.96678e-08	1.70091e-05
CG32204	7799.67	0.685286	0.145308	4.71609	2.40418e-06	0.000268813
CG5955	579.104	0.679019	0.200396	3.38839	0.000703037	0.0222786
Irp-1B	2467.19	0.678702	0.136986	4.95452	7.25099e-07	0.000104495
Apoltp	19386.2	0.661973	0.141329	4.6839	2.81466e-06	0.000309374
CG5773	877.262	0.661259	0.194441	3.40082	0.000671841	0.0216761
su(r)	1676.15	0.661184	0.172239	3.83876	0.000123659	0.0066275
CG5065	17051.7	0.659935	0.143798	4.58932	4.44683e-06	0.000443656
Cyp4d21	3573.38	0.658517	0.218968	3.00736	0.00263524	0.0554854
CG14186	6117.93	0.650951	0.0906352	7.1821	6.86483e-13	4.94649e-10
CG14688	886.55	0.627649	0.189905	3.30506	0.000949557	0.0274905
CG1628	560.073	0.626761	0.196866	3.1837	0.00145405	0.0366106
dac	7006.4	0.622666	0.130463	4.77274	1.81735e-06	0.00021825
Thor	1612.55	0.618716	0.195705	3.16148	0.00156972	0.0385592
Hacd1	832.585	0.603332	0.173158	3.48429	0.000493439	0.0174729
CG13096	263.853	0.60114	0.171097	3.51344	0.000442338	0.0163918
Ns4	654.162	0.591746	0.121613	4.86579	1.14001e-06	0.000156088
Tg	606.323	0.589414	0.160219	3.6788	0.000234332	0.0101974
Lgr3	488.286	0.586752	0.214443	2.73616	0.00621602	0.0936744
btl	251.026	0.582009	0.184617	3.15252	0.00161867	0.0393386
Tsp42Eg	481.776	0.573521	0.150364	3.81421	0.000136618	0.006905
CG4577	16135.9	0.56885	0.0949199	5.99295	2.06069e-09	6.3636e-07
CG10205	502.498	0.56572	0.166751	3.39259	0.000692342	0.0221174
sNPF	9900.98	0.563083	0.139362	4.04045	5.33491e-05	0.00332663
CngA	481.467	0.561984	0.162156	3.46571	0.000528842	0.0182422
CG15544	465.05	0.561601	0.13296	4.22384	2.4018e-05	0.00183573
CG12746	965.763	0.560564	0.102006	5.49538	3.89877e-08	7.43633e-06
CG2865	3422.65	0.552264	0.114976	4.80328	1.56084e-06	0.000199358
CG10341	198.424	0.552095	0.168398	3.27851	0.00104357	0.0290453
Lgr1	1201.19	0.550387	0.135017	4.07642	4.5734e-05	0.00290769
dl	2957.21	0.544261	0.134062	4.05977	4.91219e-05	0.00309277
hec	689.03	0.542463	0.195353	2.77683	0.00548915	0.0888509
CG42319	1051.03	0.54192	0.174933	3.09786	0.00194922	0.0445094
CG5326	1572.61	0.540987	0.141441	3.82482	0.00013087	0.0068018
CG11980	332.424	0.534907	0.138093	3.87354	0.000107265	0.00599669
Nop60B	501.478	0.530445	0.119734	4.43019	9.41522e-06	0.000872253
CG5080	1100.77	0.525446	0.160171	3.28053	0.00103612	0.0289623
Achl	3184.97	0.524739	0.148242	3.53974	0.000400525	0.0152788
CG10026	458.258	0.524418	0.16633	3.15288	0.0016167	0.0393386
SelG	504.669	0.524123	0.193627	2.70688	0.00679197	0.0980128
Hr51	809.037	0.522875	0.189525	2.75887	0.00580019	0.0912968
CG7530	1688.12	0.521579	0.123426	4.22584	2.38047e-05	0.00183573
CG8665	2082.08	0.510977	0.174286	2.93183	0.00336975	0.0648452
CG3597	845.406	0.502905	0.187308	2.68491	0.00725491	0.0998898
CG5597	826.181	0.500866	0.185628	2.69823	0.00697096	0.0982766
CG30158	9290.68	0.499761	0.13591	3.67713	0.000235868	0.0101974
CG10550	1977.5	0.497818	0.107996	4.60961	4.0342e-06	0.000415266
CG14407	360.885	0.494029	0.183247	2.69598	0.00701818	0.0985127
CG3625	2456.97	0.491188	0.117295	4.18763	2.81878e-05	0.00200877
AANAT1	4289.68	0.48814	0.0804575	6.06705	1.30277e-09	4.22424e-07
Cyp9h1	345.165	0.487328	0.17972	2.7116	0.00669601	0.0975811
CG9253	534.808	0.485577	0.135088	3.59453	0.000324975	0.0128504
Mat89Ba	344.391	0.480763	0.151111	3.18152	0.00146506	0.036683
CG43324	667.854	0.480518	0.158526	3.03117	0.00243607	0.052276
CG4968	259.629	0.476881	0.173581	2.74731	0.00600856	0.0926905
knrl	1402.85	0.476175	0.128132	3.71629	0.000202173	0.00936492
CG9338	610.497	0.473588	0.172729	2.74179	0.00611056	0.0931018
CG10947	2492.11	0.472228	0.128307	3.68046	0.000232818	0.0101974
kni	562.488	0.470648	0.130306	3.61187	0.000304001	0.012245
Dop1R2	9069.1	0.466505	0.142742	3.26816	0.0010825	0.0296311
Elk	7581.25	0.4621	0.135806	3.40264	0.000667374	0.0216396
CG31522	11635	0.461234	0.127118	3.62841	0.000285177	0.0116313
CysRS	367.311	0.461172	0.159369	2.89374	0.00380681	0.0697378
Max	323.046	0.460274	0.163013	2.82354	0.0047496	0.0808429
jeb	14570.2	0.459876	0.131591	3.49474	0.000474518	0.0170958
mod	1123.94	0.459376	0.0847276	5.42179	5.9005e-08	1.09328e-05
CG44242	384.072	0.455046	0.168294	2.70388	0.00685349	0.0980688
Sod3	982.099	0.454325	0.157255	2.88909	0.00386354	0.0701823
CG5191	2905.55	0.450915	0.0993281	4.53965	5.63465e-06	0.000545384
CG14894	327.648	0.44678	0.164301	2.71927	0.00654256	0.0956119
CG32276	1381.33	0.445824	0.135081	3.30042	0.000965395	0.0277
meng	1933.38	0.441439	0.111232	3.96861	7.22926e-05	0.00433165
CG14220	340.054	0.440407	0.129768	3.3938	0.000689306	0.0221174
Rgk1	13916.9	0.440168	0.147529	2.98361	0.0028487	0.0577308
Pxn	7833.82	0.43537	0.101822	4.2758	1.90452e-05	0.00158344
Rgk2	1692.01	0.435217	0.100534	4.32903	1.49768e-05	0.00127795
CG30172	606.367	0.434871	0.159878	2.72002	0.00652776	0.0956119
Rbsn-5	383.874	0.432067	0.13916	3.10481	0.00190401	0.0439413
MsrA	1051.25	0.431259	0.113106	3.81288	0.000137355	0.006905
imd	286.824	0.431063	0.146881	2.93479	0.00333778	0.0644212
COX8	1219.54	0.430553	0.158257	2.7206	0.0065164	0.0956119
CG4554	692.892	0.428041	0.123059	3.47833	0.000504547	0.0176864
ELOVL	3386.73	0.421404	0.143518	2.93624	0.00332218	0.0643115
CG44247	10612.1	0.421342	0.0965227	4.36522	1.26997e-05	0.00112483
ey	7659.44	0.415375	0.150946	2.75181	0.00592674	0.092176
ADPS	1206.84	0.41254	0.130445	3.16256	0.00156386	0.0385592
Cdc7	1127.83	0.412303	0.122393	3.36868	0.000755288	0.0235483
CG32694	3105.22	0.408122	0.143657	2.84095	0.00449792	0.077992
CG7133	281.43	0.407598	0.145046	2.81013	0.00495211	0.0827691
RpA-70	770.647	0.402194	0.119219	3.37357	0.000741991	0.0233583
CG32547	2163.19	0.401735	0.106235	3.78158	0.000155835	0.00759844
jdp	13804.5	0.398964	0.138078	2.88941	0.00385967	0.0701823
a	5621.06	0.396227	0.128007	3.09535	0.00196581	0.0447307
CG9837	1607.05	0.384754	0.105495	3.64713	0.000265189	0.0111372
CG13284	865.026	0.382769	0.132825	2.88175	0.00395469	0.0714218
Syx17	465.002	0.381847	0.139279	2.74161	0.00611395	0.0931018
Rat1	637.629	0.378891	0.10683	3.54667	0.000390134	0.0149705
out	1037.63	0.377434	0.134495	2.8063	0.00501141	0.083545
CG11319	17103	0.376152	0.102264	3.67826	0.000234834	0.0101974
Chmp1	633.518	0.372846	0.124436	2.99629	0.00273285	0.0564412
CG8306	2144.86	0.372336	0.12118	3.07259	0.00212208	0.047129
CG42339	7205.85	0.372192	0.124297	2.99438	0.00275001	0.0566153
Irk2	1096.85	0.370538	0.114179	3.24524	0.00117353	0.0309891
CG31760	5160.15	0.366727	0.112095	3.27158	0.00106949	0.0295135
5-HT1A	7730.01	0.365943	0.112652	3.24845	0.00116037	0.0309891
Vha14-1	898.625	0.364325	0.112603	3.23549	0.00121434	0.0317541
ash2	410.801	0.357604	0.132221	2.70458	0.00683899	0.0980688
Trp1	2771.06	0.352665	0.0929692	3.79335	0.00014863	0.00735778
CROT	805.177	0.351848	0.119757	2.93802	0.00330312	0.0641339
rut	32669.2	0.351174	0.120385	2.9171	0.00353302	0.0666037
CG13185	1921.91	0.350492	0.102193	3.42971	0.000604237	0.0199922
beta4GalNAcTA	552.248	0.350451	0.128549	2.72622	0.00640652	0.0946385
Hex-A	9107.87	0.345955	0.114128	3.03127	0.00243524	0.052276
nvy	1421.39	0.345794	0.103055	3.35545	0.000792368	0.0243505
srl	695.054	0.345068	0.121178	2.84761	0.00440493	0.0765844
by	2115.13	0.344282	0.120705	2.85227	0.00434086	0.0760823
Ac78C	1569.66	0.34283	0.11288	3.03712	0.00238847	0.0517136
Fer1HCH	5057.78	0.342789	0.119506	2.86838	0.00412584	0.0730325
Ppcs	3936.74	0.341831	0.0879469	3.88679	0.000101577	0.00572806
fkh	1292.19	0.341004	0.121063	2.81674	0.00485131	0.0817162
Vps60	778.295	0.340765	0.106903	3.18761	0.00143455	0.0363402
CG17816	24370.9	0.340637	0.117443	2.90045	0.00372633	0.0688469
lwr	824.892	0.337095	0.120343	2.80112	0.00509252	0.0844629
CG4502	2633.43	0.336674	0.0987472	3.40945	0.000650936	0.0213198
CG4660	898.756	0.334489	0.111886	2.98954	0.00279393	0.0573375
Ktl	3563.7	0.331971	0.107583	3.08573	0.00203054	0.0457225
RpI1	585.544	0.331636	0.115123	2.8807	0.00396787	0.0714218
puml	1813.2	0.326307	0.0956089	3.41293	0.00064268	0.0211562
Sply	1069.19	0.320222	0.113278	2.82688	0.00470036	0.080427
trc	2228.09	0.31635	0.0799436	3.95716	7.58471e-05	0.00442801
CG12531	10690.7	0.315763	0.100867	3.13049	0.00174515	0.0414406
CG8042	1112.86	0.314949	0.114902	2.74103	0.00612465	0.0931018
kdn	12179.3	0.31171	0.095381	3.26805	0.0010829	0.0296311
HDAC1	766.605	0.310252	0.114654	2.70597	0.00681049	0.0980128
qm	2752.52	0.309517	0.107697	2.87396	0.00405358	0.0722336
Kr-h2	1364.32	0.307116	0.103567	2.9654	0.00302292	0.0600377
CG2921	466.11	0.306337	0.110477	2.77286	0.00555663	0.0890765
Vha36-1	1636.2	0.302324	0.103424	2.92316	0.00346501	0.0658961
metro	2563.93	0.30065	0.103722	2.89863	0.00374799	0.0690504
Pka-C1	28271.7	0.29494	0.109727	2.68794	0.00718947	0.0996233
msk	2275.9	0.292896	0.07405	3.95538	7.6412e-05	0.00442801
Rbp	23628.4	0.290316	0.0972172	2.98626	0.0028241	0.057589
Pka-R1	9737.58	0.286325	0.0825848	3.46704	0.000526228	0.0182422
Nopp140	772.198	0.285382	0.105452	2.70627	0.00680434	0.0980128
Cen	1568.99	0.280892	0.0846236	3.31931	0.000902398	0.0264799
btsz	16613.3	0.277526	0.0984209	2.81978	0.00480559	0.0813688
CG8500	4655.32	0.275782	0.0986661	2.79511	0.00518828	0.0856132
Syngr	5636.3	0.275023	0.101736	2.7033	0.00686557	0.0980688
Ns2	745.136	0.269038	0.0935979	2.8744	0.00404793	0.0722336
Snap24	1213.22	0.268625	0.0906002	2.96495	0.00302734	0.0600377
CG5787	1016.53	0.268135	0.0973488	2.75437	0.00588051	0.092176
krz	2551.34	0.265202	0.0901726	2.94104	0.00327108	0.0637026
Octbeta3R	5550.04	0.263257	0.0930894	2.828	0.00468398	0.0803587
Hsc70-4	29235.2	0.262713	0.091924	2.85794	0.00426407	0.074939
nahoda	4047.91	0.260552	0.093941	2.77357	0.00554451	0.0890765
Dgk	6472.78	0.258081	0.0920073	2.80501	0.0050315	0.0836648
CG1814	1800.35	0.255091	0.0834271	3.05765	0.00223078	0.0487091
Plc21C	17755.1	0.247737	0.0818253	3.02763	0.00246477	0.0525791
cnk	1651.06	0.244508	0.0814159	3.0032	0.0026716	0.0558901
unc-104	42112.9	0.244396	0.0837476	2.91824	0.00352008	0.0665532
sdt	21069.9	0.244066	0.0822945	2.96576	0.00301936	0.0600377
Droj2	7846.16	0.240599	0.0881638	2.72901	0.00635257	0.0944871
Dp1	8616.21	0.240235	0.0657341	3.65465	0.000257534	0.0109876
CG8289	744.157	0.239426	0.0860948	2.78096	0.00541983	0.0883105
plx	10735.3	0.238304	0.0799225	2.98168	0.00286667	0.0579139
Sec63	1265.61	0.237075	0.0819639	2.89244	0.00382268	0.0698312
dia	2127.1	0.231864	0.0782897	2.96161	0.00306037	0.0605075
Rgl	4067.87	0.231726	0.0821675	2.82016	0.00479997	0.0813688
crb	6122.99	0.217181	0.0696769	3.11698	0.00182717	0.0423184
oys	4493.33	0.216983	0.0602165	3.60337	0.000314117	0.0125744
sbm	5418.1	0.20776	0.0720073	2.88527	0.00391077	0.0708418
Cdc27	1538.25	0.207753	0.0724988	2.86561	0.0041621	0.0733457
ClC-c	3073.58	0.206945	0.073575	2.81271	0.00491266	0.0823219
emb	3001.9	0.19752	0.0663353	2.9776	0.00290515	0.0585091
eIF3b	4240.62	0.19489	0.0711087	2.74073	0.00613022	0.0931018
rdgB	15373.6	0.194243	0.0713307	2.72313	0.00646663	0.0953093
Sam-S	9285.35	0.192462	0.0621067	3.09889	0.00194249	0.0445094
Tak1	1846.44	0.181613	0.0590913	3.07343	0.00211613	0.047129
svr	9625.78	0.17313	0.0583783	2.96565	0.00302043	0.0600377
Mi-2	5460.89	0.168738	0.0576623	2.92631	0.00343007	0.0654235

## Sheet: 7h-DT MB TRG
	baseMean	log2FoldChange	lfcSE	stat	pvalue	padj
tobi	13366.6	-2.21086	0.274039	-8.0677	7.16362e-16	7.74268e-13
FASN3	478.972	-2.04458	0.652747	-3.13227	0.00173462	0.0414406
Ubx	236.22	-1.8031	0.597667	-3.0169	0.00255377	0.0542989
CG31075	1603.2	-1.67887	0.183128	-9.16776	4.82951e-20	1.04398e-16
lectin-28C	592.532	-1.56969	0.295802	-5.30654	1.11724e-07	1.85777e-05
CG3999	845.061	-1.53974	0.221045	-6.96574	3.26673e-12	1.92588e-09
AkhR	630.113	-1.38679	0.240862	-5.7576	8.532e-09	1.90793e-06
alpha-Est2	350.043	-1.38278	0.203454	-6.79654	1.07158e-11	5.34555e-09
CG8745	1300.99	-1.27691	0.121549	-10.5053	8.16345e-26	5.294e-22
CG3376	2208.31	-1.22747	0.194584	-6.30816	2.82371e-10	1.07716e-07
Amy-p	1998.78	-1.19695	0.369301	-3.24112	0.00119062	0.0312598
Gbs-70E	7375.59	-1.18884	0.150329	-7.90826	2.6101e-15	2.41807e-12
Sodh-1	5052.85	-1.18468	0.20063	-5.90479	3.53098e-09	9.15936e-07
CG16898	786.948	-1.1709	0.201168	-5.82051	5.86695e-09	1.40915e-06
dsb	4315.79	-1.15868	0.239218	-4.8436	1.2751e-06	0.000168756
Gart	6413.17	-1.14634	0.268448	-4.27024	1.95259e-05	0.00158446
Jabba	1831.73	-1.04437	0.175586	-5.94792	2.71567e-09	8.00505e-07
Galk	3953.06	-1.0442	0.17612	-5.92889	3.04985e-09	8.24096e-07
CG34330	232.731	-1.04299	0.25417	-4.10349	4.06956e-05	0.00263911
Prat2	4762.01	-0.994688	0.204536	-4.86315	1.15532e-06	0.000156088
CG18302	361.499	-0.950469	0.200953	-4.72981	2.24735e-06	0.000260251
comm3	748.584	-0.932474	0.158309	-5.89023	3.8567e-09	9.6195e-07
Lsp2	28008.7	-0.929271	0.340635	-2.72806	0.00637088	0.0945427
Amy-d	1225.15	-0.924447	0.343503	-2.69123	0.00711885	0.0990681
CG18547	462.884	-0.920913	0.239676	-3.84233	0.000121874	0.00658626
CG17124	5043.39	-0.911613	0.122452	-7.44464	9.72089e-14	7.87999e-11
Cyp6g1	4157.4	-0.86902	0.206159	-4.21528	2.49468e-05	0.00188116
Got2	5247.02	-0.839605	0.141513	-5.93307	2.97321e-09	8.24096e-07
CG5793	650.666	-0.834247	0.162148	-5.14497	2.67565e-07	4.13133e-05
Shmt	4423.6	-0.772892	0.183001	-4.22343	2.40613e-05	0.00183573
CG13318	215.234	-0.768374	0.230383	-3.33521	0.000852364	0.0258298
Cyp12e1	223.285	-0.766216	0.175621	-4.36289	1.28354e-05	0.00112483
CG3699	1601.29	-0.763373	0.227431	-3.35651	0.000789339	0.0243505
CG15553	497.763	-0.757713	0.192812	-3.9298	8.50157e-05	0.004879
hgo	406.229	-0.751045	0.178428	-4.20924	2.56235e-05	0.00188828
CG3270	559.551	-0.747827	0.145981	-5.12275	3.01106e-07	4.5411e-05
Hml	2930.35	-0.743932	0.193485	-3.84491	0.000120595	0.00658626
CG10516	949.899	-0.7224	0.198999	-3.63017	0.000283235	0.0116252
bmm	3377.52	-0.720619	0.150928	-4.7746	1.8006e-06	0.00021825
CG9664	446.019	-0.717372	0.207261	-3.4612	0.000537763	0.0184305
Tps1	13260.9	-0.708216	0.203021	-3.48838	0.000485954	0.0173154
CG2121	599.849	-0.706608	0.18746	-3.76937	0.000163658	0.00786165
comm2	637.487	-0.697095	0.167515	-4.1614	3.16306e-05	0.00220564
CG30046	658.89	-0.686502	0.234941	-2.92202	0.00347767	0.0659435
lz	583.621	-0.682515	0.201456	-3.38792	0.000704257	0.0222786
CG7322	1345.96	-0.673465	0.192975	-3.4899	0.000483202	0.0173125
TfAP-2	894.807	-0.666788	0.1765	-3.77784	0.000158196	0.00765598
CG10175	860.976	-0.664187	0.140558	-4.72535	2.29724e-06	0.000261361
CG7135	859.781	-0.641431	0.17349	-3.69721	0.00021798	0.0097657
CG16965	365.323	-0.639189	0.232266	-2.75197	0.0059238	0.092176
Argl	1750.04	-0.637533	0.170901	-3.73042	0.000191163	0.00898327
Lapsyn	538.511	-0.635171	0.196677	-3.22952	0.00124	0.0322947
CG7966	940.369	-0.629991	0.150065	-4.19811	2.69151e-05	0.00196117
cu	1278.24	-0.624104	0.129957	-4.80239	1.56782e-06	0.000199358
Taldo	3267.16	-0.622137	0.154335	-4.03109	5.55189e-05	0.00342895
UGP	3342.69	-0.621782	0.156153	-3.98188	6.83709e-05	0.00414379
AdamTS-B	652.788	-0.616694	0.164765	-3.74286	0.000181936	0.00861209
Dll	1552.12	-0.6158	0.187398	-3.28605	0.00101601	0.0286472
wb	1358.48	-0.60228	0.180989	-3.32771	0.000875643	0.0262895
Cyp28d1	4218.68	-0.597875	0.188831	-3.1662	0.00154446	0.0385223
CG13795	586.102	-0.58388	0.198063	-2.94794	0.00319896	0.0626744
CG15365	307.437	-0.58252	0.182586	-3.19039	0.00142083	0.036276
Nmdmc	1826.44	-0.581287	0.200359	-2.90122	0.00371712	0.0688469
Fs	833.959	-0.576997	0.175736	-3.28332	0.00102592	0.0288014
GstS1	1616.9	-0.575305	0.160807	-3.57762	0.000346737	0.0134646
sosie	574.998	-0.573696	0.196741	-2.916	0.00354551	0.0666453
CG40006	6368.45	-0.566948	0.162142	-3.49662	0.000471194	0.0170709
CG42534	278.573	-0.564551	0.206576	-2.7329	0.00627794	0.0938074
CG7997	1396.5	-0.558859	0.181744	-3.07497	0.00210522	0.0470771
CG31445	1330.29	-0.55762	0.178452	-3.12475	0.00177953	0.0418126
Grd	780.104	-0.551881	0.176773	-3.12199	0.00179636	0.0419042
Lim3	943.959	-0.550773	0.139253	-3.95519	7.64745e-05	0.00442801
CG30440	494.417	-0.550121	0.144198	-3.81505	0.000136157	0.006905
Nha2	726.043	-0.544031	0.173839	-3.12952	0.00175092	0.0414406
Got1	4227.15	-0.541825	0.0977395	-5.54356	2.96383e-08	6.00639e-06
Hpd	3243.29	-0.540071	0.149974	-3.60109	0.000316888	0.0126075
bbg	5703.05	-0.53715	0.162107	-3.31355	0.000921187	0.0267888
Cdk4	325.253	-0.534887	0.198051	-2.70076	0.00691818	0.0982766
CG32091	487.836	-0.525797	0.131937	-3.98521	6.74213e-05	0.00412478
CG15478	306.744	-0.524028	0.190289	-2.75384	0.00588997	0.092176
CG9008	556.509	-0.522669	0.138131	-3.78386	0.000154416	0.00758628
CG13315	3178.66	-0.520806	0.192944	-2.69926	0.00694937	0.0982766
GLaz	630.593	-0.516655	0.186884	-2.76457	0.00569971	0.0903634
CG6845	339.608	-0.516346	0.184837	-2.79352	0.00521377	0.0858154
CG10361	330.809	-0.515625	0.19135	-2.69467	0.00704581	0.098687
B-H1	236.921	-0.512612	0.190592	-2.68958	0.0071543	0.0993483
CG11407	1481.88	-0.511192	0.188626	-2.71008	0.00672679	0.0978099
CG18003	1030.24	-0.509563	0.182516	-2.79188	0.00524024	0.0860327
SCOT	638.021	-0.506018	0.140994	-3.58893	0.000332034	0.0130499
bab1	2919.05	-0.5001	0.130118	-3.84344	0.00012132	0.00658626
CG33143	2640.48	-0.499851	0.102456	-4.87868	1.06798e-06	0.000150561
AstA-R1	3618.27	-0.497124	0.135365	-3.67247	0.000240219	0.0103167
bgm	2783.19	-0.493217	0.164253	-3.00279	0.0026752	0.0558901
tim	12229.6	-0.491616	0.150616	-3.26403	0.0010984	0.029929
CG11089	4339.96	-0.491507	0.157232	-3.12599	0.00177207	0.0417887
CG40470	3371.87	-0.489091	0.127529	-3.83513	0.000125497	0.00667088
Invadolysin	4244.54	-0.488375	0.114643	-4.25995	2.04469e-05	0.00163701
Adgf-D	749.056	-0.482881	0.177589	-2.71909	0.00654614	0.0956119
CG17544	969.377	-0.481406	0.106682	-4.51251	6.40644e-06	0.000610967
AstC-R1	1044.23	-0.477327	0.152871	-3.12242	0.00179374	0.0419042
CG18135	10365.8	-0.476625	0.114755	-4.15342	3.27549e-05	0.00223595
DIP-eta	794.25	-0.476341	0.143335	-3.32327	0.000889678	0.026345
CG31100	496.73	-0.4759	0.151019	-3.15125	0.00162571	0.0393386
hbs	1509.67	-0.474204	0.121253	-3.91087	9.19662e-05	0.00523158
CG9663	875.354	-0.467131	0.159426	-2.93007	0.00338887	0.0650202
CG9747	1018.21	-0.464211	0.140564	-3.3025	0.000958274	0.0276196
DhpD	934.665	-0.463396	0.120584	-3.84293	0.000121576	0.00658626
CG31869	1330.22	-0.461306	0.105276	-4.38188	1.17662e-05	0.00105978
Phk-3	424.693	-0.460657	0.163669	-2.81455	0.00488449	0.082062
CG34376	3172.25	-0.459845	0.170427	-2.69819	0.00697168	0.0982766
CARPB	4781.2	-0.459662	0.115874	-3.96692	7.28065e-05	0.00433165
Pvf1	296.549	-0.453134	0.146498	-3.09311	0.00198072	0.0449125
GstZ2	905.997	-0.452749	0.118183	-3.83091	0.000127672	0.00673131
acj6	1213.23	-0.450663	0.144519	-3.11836	0.00181863	0.0422717
CG4678	2034.53	-0.450584	0.107004	-4.2109	2.54356e-05	0.00188828
MsR1	997.715	-0.449327	0.123079	-3.65071	0.000261518	0.0110846
LpR2	5642.52	-0.44873	0.0966111	-4.6447	3.40572e-06	0.000363103
msi	9523.97	-0.445979	0.126373	-3.52906	0.000417033	0.0157236
erm	1050.64	-0.444661	0.160383	-2.77249	0.00556299	0.0890765
hbn	310.718	-0.439963	0.163732	-2.6871	0.00720756	0.0996488
FucTC	282.749	-0.439662	0.151088	-2.90998	0.0036145	0.0673563
CG32532	435.408	-0.439198	0.143326	-3.06433	0.00218156	0.0481204
PGRP-LA	686.379	-0.438646	0.127014	-3.45352	0.000553319	0.0186142
fz2	12479.1	-0.438258	0.0848809	-5.16321	2.42756e-07	3.83969e-05
gt	353.303	-0.431835	0.141668	-3.04821	0.00230206	0.0500968
TkR99D	603.944	-0.429311	0.134339	-3.19574	0.00139474	0.0357504
CAH7	853.064	-0.428329	0.124173	-3.44944	0.000561742	0.0187778
mirr	876.22	-0.427499	0.12088	-3.53655	0.000405384	0.0153738
CG11241	728.653	-0.426009	0.135184	-3.15132	0.00162536	0.0393386
CG1299	1088.63	-0.42569	0.142594	-2.98532	0.00283283	0.057589
PGRP-LC	1418.15	-0.42286	0.13629	-3.10264	0.00191801	0.0441075
yuri	648.335	-0.419537	0.151101	-2.77654	0.0054941	0.0888509
Stat92E	14257	-0.417588	0.0909664	-4.59057	4.42028e-06	0.000443656
shf	468.217	-0.415682	0.144818	-2.87037	0.00409998	0.0728449
Oatp30B	5385.02	-0.414638	0.0899475	-4.60978	4.03104e-06	0.000415266
yin	839.813	-0.409388	0.125949	-3.25043	0.00115229	0.0309891
Ets65A	1266.18	-0.409316	0.114684	-3.56909	0.000358224	0.0138279
Rab9	896.274	-0.404143	0.121721	-3.32024	0.000899395	0.0264799
beat-Va	940.794	-0.401331	0.138306	-2.90176	0.00371073	0.0688469
CG31183	1995.24	-0.401233	0.137653	-2.9148	0.00355911	0.0667076
CG9220	547.294	-0.400741	0.146348	-2.73827	0.00617639	0.0935839
Akr1B	2996.18	-0.400401	0.125556	-3.18902	0.00142758	0.0363052
CG9331	1959.07	-0.399372	0.141018	-2.83206	0.00462487	0.079555
kek5	9865.4	-0.399043	0.12616	-3.163	0.00156155	0.0385592
CG5888	1436.81	-0.396164	0.143005	-2.77029	0.00560069	0.089314
CG34393	1920.55	-0.391896	0.119656	-3.27519	0.00105591	0.0292631
DIP-theta	1616.83	-0.39073	0.111386	-3.5079	0.00045166	0.0165481
pdm3	12891.2	-0.389284	0.112603	-3.45715	0.000545926	0.0185357
CG32052	1699	-0.388047	0.0914565	-4.24297	2.20581e-05	0.00174447
Rx	462.104	-0.387997	0.142148	-2.72952	0.00634266	0.0944871
AMPdeam	5545.2	-0.387759	0.063012	-6.15374	7.56768e-10	2.72647e-07
vn	2885.97	-0.38006	0.12786	-2.97246	0.00295421	0.0593129
CG33639	1455.65	-0.379392	0.12702	-2.98686	0.00281861	0.057589
AGBE	1765.48	-0.379306	0.1288	-2.94493	0.00323031	0.0630981
CG45002	11679.4	-0.379171	0.100767	-3.76285	0.000167988	0.00801031
CG31145	11520.4	-0.375634	0.108128	-3.47399	0.000512776	0.0178783
CG43795	3688.67	-0.374022	0.104526	-3.57827	0.000345882	0.0134646
CG3301	1083.2	-0.373226	0.136153	-2.74122	0.00612122	0.0931018
CG31751	1570.58	-0.372184	0.111984	-3.32356	0.000888757	0.026345
sNPF-R	2445.48	-0.369359	0.0865007	-4.27001	1.95461e-05	0.00158446
Ac76E	3477.53	-0.369136	0.106684	-3.4601	0.000539985	0.0184305
side-V	5148.62	-0.366487	0.0887229	-4.13069	3.61673e-05	0.00238996
DIP-lambda	7081.37	-0.365673	0.133115	-2.74705	0.00601348	0.0926905
Prps	8182.77	-0.365086	0.115986	-3.14768	0.00164572	0.0396748
CG4313	542.133	-0.364557	0.119213	-3.05802	0.00222806	0.0487091
ham	673.442	-0.363268	0.134668	-2.6975	0.0069862	0.0982766
grn	1391.33	-0.362652	0.128007	-2.83306	0.00461047	0.0795183
Akap200	4460.5	-0.361093	0.0755677	-4.7784	1.76693e-06	0.00021825
esn	1609.98	-0.360682	0.107175	-3.36535	0.000764473	0.0237206
LpR1	4017.5	-0.356459	0.096102	-3.70918	0.000207933	0.00949609
betaTub97EF	1970.79	-0.353913	0.119865	-2.95259	0.00315117	0.0619875
Pvf3	5728.79	-0.350038	0.109964	-3.18321	0.00145652	0.0366106
rdo	3753.36	-0.349187	0.118277	-2.95228	0.00315434	0.0619875
beat-IIb	2303.89	-0.348839	0.107395	-3.24819	0.00116143	0.0309891
CG31663	1629.39	-0.346341	0.094988	-3.64615	0.000266194	0.0111372
CG13579	2413.7	-0.345413	0.12228	-2.82478	0.00473136	0.0807444
Octbeta2R	11821.4	-0.343053	0.106862	-3.21024	0.00132626	0.0344033
LRP1	14754.4	-0.341296	0.0734901	-4.64411	3.41547e-06	0.000363103
CG3407	255.459	-0.338867	0.123962	-2.73364	0.00626382	0.0938074
Dscam3	5666.97	-0.335121	0.103281	-3.24475	0.00117553	0.0309891
ATPCL	14437	-0.330333	0.0907214	-3.64118	0.000271391	0.01121
app	10820.9	-0.32682	0.108931	-3.00025	0.00269755	0.0558901
Swip-1	2637.78	-0.325234	0.117883	-2.75896	0.00579864	0.0912968
hig	13757	-0.323919	0.0940544	-3.44395	0.000573277	0.0190651
Blimp-1	9908.77	-0.322206	0.0780409	-4.12868	3.64852e-05	0.00238996
CadN2	8879.44	-0.321474	0.105109	-3.05848	0.00222464	0.0487091
side-VIII	9136.11	-0.321372	0.0977332	-3.28825	0.00100811	0.0285484
Teh1	3810.67	-0.319731	0.113506	-2.81687	0.00484948	0.0817162
smal	5561.48	-0.319477	0.0864612	-3.69503	0.00021986	0.0097657
CG13594	2382.55	-0.318685	0.110652	-2.88007	0.00397583	0.0714218
PhKgamma	4773.05	-0.318468	0.0905483	-3.5171	0.00043629	0.0163546
dpr13	3586.96	-0.318061	0.105944	-3.00217	0.00268063	0.0558901
zyd	1197.15	-0.317906	0.10977	-2.89613	0.00377801	0.0694063
CG7766	8784.94	-0.314496	0.0932995	-3.37083	0.000749434	0.0234787
Gpdh1	10888.6	-0.313196	0.109913	-2.8495	0.00437877	0.0763343
CG12163	5987.39	-0.312682	0.115706	-2.70239	0.0068843	0.0981201
sli	9544.57	-0.312345	0.0716816	-4.3574	1.31619e-05	0.00113806
DPCoAC	580.486	-0.311226	0.115266	-2.70008	0.00693231	0.0982766
CG4168	5156.07	-0.309954	0.103293	-3.00074	0.00269323	0.0558901
robo2	1370.22	-0.309899	0.108061	-2.86782	0.00413307	0.0730325
RhoGAP18B	3797.95	-0.308574	0.113171	-2.72663	0.00639855	0.0946385
CG13868	8804.66	-0.30825	0.0949946	-3.24492	0.00117483	0.0309891
Atg16	773.624	-0.308199	0.0918853	-3.35417	0.000796036	0.0243505
beat-IIa	4448.55	-0.307073	0.104835	-2.92912	0.00339928	0.0650274
CG31690	3925.09	-0.304767	0.109297	-2.78843	0.00529639	0.086735
stan	4906.27	-0.304425	0.0821655	-3.70502	0.000211373	0.00958571
Syp	30379	-0.304315	0.111271	-2.73489	0.00624014	0.0936744
GABA-B-R3	2619.94	-0.300833	0.0997522	-3.01581	0.00256295	0.0543161
dpr3	3041.82	-0.298962	0.0986551	-3.03037	0.0024425	0.052276
Eip78C	4448.47	-0.296658	0.089918	-3.2992	0.000969608	0.0277
Ca-alpha1T	36855	-0.292088	0.101635	-2.87389	0.00405444	0.0722336
Mondo	4986.22	-0.291782	0.0807552	-3.61317	0.000302475	0.012245
ct	12767.4	-0.290001	0.105387	-2.75179	0.00592712	0.092176
nolo	8691.37	-0.288225	0.0791175	-3.643	0.000269481	0.0112025
tkv	6631.13	-0.286327	0.0861102	-3.32512	0.000883791	0.026345
Piezo	4974.8	-0.284966	0.0770946	-3.69632	0.000218749	0.0097657
SMSr	712.279	-0.284556	0.0945015	-3.01113	0.00260278	0.0549806
CG7065	1619.92	-0.281489	0.100694	-2.79549	0.00518204	0.0856132
aralar1	4207.86	-0.281331	0.0801637	-3.50945	0.000449028	0.0165452
CG42458	1471	-0.280331	0.0914571	-3.06516	0.00217554	0.0481204
CG4341	8927.57	-0.277941	0.0903645	-3.07577	0.00209958	0.0470771
C1GalTA	1548.36	-0.275765	0.0831453	-3.31667	0.000910988	0.0266115
sano	5179.18	-0.274005	0.100179	-2.73516	0.00623491	0.0936744
Btk29A	2654.07	-0.268206	0.0965096	-2.77906	0.00545159	0.0886054
MRP	8385.94	-0.266875	0.0811459	-3.28883	0.00100606	0.0285484
ssp6	1421.25	-0.26599	0.095579	-2.78293	0.00538703	0.0879972
CG17716	10660.4	-0.264557	0.0982541	-2.69258	0.00709008	0.09888
Hs6st	5369.99	-0.263936	0.0975487	-2.70569	0.00681631	0.0980128
sns	8551.66	-0.262698	0.094694	-2.77418	0.00553416	0.0890765
Ptpmeg	4056.21	-0.262629	0.0754022	-3.48304	0.000495761	0.0174729
axo	4383.46	-0.261147	0.0916035	-2.85084	0.00436034	0.0762178
capu	3692.21	-0.258728	0.0837577	-3.089	0.00200829	0.045379
Sdc	21691.8	-0.255548	0.0877326	-2.91281	0.00358197	0.0669426
cindr	6287.28	-0.25382	0.0663691	-3.82437	0.000131106	0.0068018
CG32549	6841.25	-0.253109	0.0722867	-3.50145	0.000462729	0.0168584
Ndae1	10445.6	-0.252338	0.0755826	-3.33857	0.0008421	0.0256386
CG17839	21048.9	-0.250917	0.0769148	-3.26228	0.00110521	0.0299887
sima	26378.1	-0.249375	0.07667	-3.25258	0.00114364	0.030902
Iml1	4539.36	-0.248908	0.0877486	-2.83661	0.00455955	0.0788498
robo3	4110.18	-0.248608	0.0899512	-2.76381	0.00571303	0.0903634
cdi	8005.59	-0.240883	0.0769259	-3.13137	0.00173993	0.0414406
spri	7981.05	-0.236416	0.0861198	-2.7452	0.00604747	0.0929333
kek2	5713.33	-0.236028	0.0859274	-2.74683	0.00601738	0.0926905
SF1	3666.98	-0.221425	0.0817982	-2.70696	0.00679021	0.0980128
jar	9921.44	-0.217317	0.0678783	-3.20156	0.00136685	0.0351748
CG2246	2073.17	-0.213226	0.0769766	-2.77002	0.00560537	0.089314
p130CAS	2874.44	-0.213026	0.0790786	-2.69386	0.00706308	0.0987157
PKD	3309.52	-0.210603	0.0761705	-2.76488	0.00569433	0.0903634
Pgant5	4494.52	-0.208592	0.0776465	-2.68643	0.00722204	0.0996488
Efa6	12075.1	-0.199438	0.0725807	-2.74781	0.00599951	0.0926905
CG31635	9795.47	-0.170361	0.0561018	-3.03664	0.0023923	0.0517136

## Sheet: 1h-AT MB TIG
	baseMean	log2FoldChange	lfcSE	stat	pvalue	padj
Nep7	383.078	1.45464	0.24541	5.92736	3.07837e-09	1.96764e-06
CG16743	382.514	1.41459	0.256579	5.51328	3.52205e-08	1.38765e-05
Tig	2638.26	1.35982	0.236031	5.76121	8.35115e-09	4.19407e-06
Sardh	515.853	1.27649	0.243151	5.24979	1.52273e-07	4.65491e-05
CG8665	2082.08	1.22417	0.174171	7.02853	2.08715e-12	4.19074e-09
fit	478.123	1.16682	0.348861	3.34464	0.00082388	0.0459818
LanB2	1040.14	1.16353	0.145527	7.99527	1.29289e-15	8.28748e-12
Hr38	6533.7	1.13184	0.166333	6.80466	1.01285e-11	1.42428e-08
atk	597.306	1.05808	0.203631	5.19607	2.03546e-07	5.50436e-05
CG9498	1255.59	1.00917	0.143963	7.00994	2.38415e-12	4.19074e-09
CG5958	954.895	0.974446	0.187855	5.18723	2.13447e-07	5.55833e-05
CG31436	183.351	0.955647	0.203195	4.70309	2.56249e-06	0.000450422
Loxl2	331.151	0.954446	0.305233	3.12694	0.00176635	0.0781084
CG5909	163.787	0.93564	0.230392	4.06108	4.88468e-05	0.00553939
CG5867	3035.37	0.916952	0.156966	5.84173	5.16627e-09	2.9492e-06
CG9436	1282.5	0.904892	0.157993	5.72743	1.01964e-08	4.77937e-06
daw	1682.99	0.867915	0.219695	3.95054	7.79767e-05	0.00830688
CG10553	380.269	0.856225	0.22471	3.81035	0.00013877	0.0128381
CG12268	228.676	0.850392	0.277673	3.06257	0.00219445	0.0893105
CG13360	477.547	0.845676	0.19469	4.34371	1.40094e-05	0.00201021
NtR	161.66	0.834809	0.270603	3.08499	0.00203557	0.0867127
CG5773	877.262	0.808617	0.194946	4.1479	3.35532e-05	0.00428932
tim	12229.6	0.787761	0.150387	5.23821	1.62139e-07	4.75e-05
NimC1	243.276	0.782241	0.224233	3.48852	0.000485708	0.031916
CG31126	169.225	0.772139	0.232992	3.31402	0.000919659	0.0489858
MFS9	394.654	0.754938	0.196161	3.84856	0.000118812	0.0114434
CG1572	751.12	0.752932	0.163289	4.61103	4.00674e-06	0.000687107
CG16820	175.35	0.750662	0.243743	3.07972	0.00207193	0.0867127
Pex2	164.336	0.73441	0.228795	3.2099	0.00132781	0.0662115
Nop60B	501.478	0.724849	0.120536	6.01353	1.81526e-09	1.41812e-06
CG10560	828.616	0.718213	0.169683	4.23268	2.30923e-05	0.00318357
CG11313	1119.97	0.714081	0.210973	3.38469	0.000712578	0.0407328
sr	2816.41	0.702016	0.129294	5.42961	5.64778e-08	2.08997e-05
out	1037.63	0.700076	0.134684	5.19791	2.0154e-07	5.50436e-05
drm	293.441	0.693936	0.202713	3.42324	0.00061879	0.0365606
Cyp4d21	3573.38	0.679947	0.219168	3.1024	0.00191956	0.0838285
Art3	160.402	0.675437	0.184109	3.66868	0.000243804	0.0190465
Kaz1-ORFB	235.738	0.670117	0.21376	3.13491	0.00171908	0.076598
Pisd	2887.08	0.667961	0.146431	4.56162	5.07598e-06	0.000829981
Irp-1B	2467.19	0.648369	0.137267	4.72342	2.31909e-06	0.000429093
DCTN5-p25	143.647	0.642254	0.20276	3.16755	0.00153727	0.0729479
alpha-Est8	2732.76	0.641236	0.121937	5.25874	1.45046e-07	4.63553e-05
MsrA	1051.25	0.626204	0.113612	5.51177	3.55251e-08	1.38765e-05
Apoltp	19386.2	0.619991	0.141377	4.38538	1.15783e-05	0.00176972
ImpL2	868.988	0.618286	0.191957	3.22096	0.00127763	0.0641643
Cpr67B	1907.44	0.617575	0.152616	4.0466	5.19664e-05	0.00577337
Nup54	213.085	0.617292	0.202036	3.05535	0.00224795	0.0905054
Elal	606.234	0.609177	0.200688	3.03544	0.00240184	0.0933081
CG6142	391.381	0.605126	0.170152	3.55638	0.000375999	0.0267035
CG14661	1907.52	0.601566	0.167934	3.58215	0.000340774	0.0245421
CG14186	6117.93	0.599806	0.0907801	6.60724	3.91551e-11	3.93285e-08
firl	260.782	0.597386	0.161225	3.70528	0.000211155	0.0171281
Adgf-A	521.213	0.596088	0.173198	3.44165	0.000578176	0.0353492
CrebA	2343.03	0.590825	0.13564	4.35584	1.32556e-05	0.00194167
alpha-Est10	764.038	0.589749	0.13069	4.51258	6.40447e-06	0.00100066
CG9717	661.673	0.588846	0.176491	3.33641	0.000848667	0.046617
CG44242	384.072	0.58821	0.169863	3.46286	0.000534472	0.0335524
Lsd-1	4093.53	0.584418	0.176295	3.31501	0.00091641	0.0489858
CG8939	386.702	0.580915	0.150674	3.85545	0.000115518	0.0114018
CG3597	845.406	0.57515	0.187825	3.06215	0.00219751	0.0893105
pst	4152.41	0.567951	0.119964	4.73435	2.19753e-06	0.000425337
CG32276	1381.33	0.548391	0.135607	4.04398	5.25523e-05	0.00577337
Tg	606.323	0.546491	0.160982	3.39473	0.000686973	0.039591
Ppn	7439.84	0.543342	0.156218	3.4781	0.000504983	0.0325737
Sod3	982.099	0.540812	0.157742	3.42847	0.000606989	0.0361673
Tsp42Eg	481.776	0.531255	0.151393	3.50911	0.000449613	0.030107
CG10205	502.498	0.531162	0.167775	3.16593	0.0015459	0.0729479
CG5033	310.628	0.507201	0.160992	3.15047	0.00163006	0.074908
Nlp	561.312	0.504944	0.163841	3.08191	0.00205679	0.0867127
Atf3	5821.57	0.501957	0.0944823	5.31271	1.08009e-07	3.61623e-05
SP1029	1124.32	0.49917	0.0895297	5.57546	2.46872e-08	1.08485e-05
Myo31DF	1343.06	0.49491	0.117131	4.22527	2.38649e-05	0.00322682
tsl	1221.68	0.490252	0.1495	3.27928	0.00104073	0.0542026
egr	512.722	0.48661	0.131362	3.70434	0.000211939	0.0171281
Ent2	680.728	0.483589	0.144588	3.3446	0.000824023	0.0459818
CG4577	16135.9	0.482823	0.0949729	5.0838	3.69963e-07	9.29003e-05
NAAT1	1075.37	0.481054	0.132072	3.64237	0.000270137	0.0204229
Drip	1048.12	0.473493	0.124971	3.78882	0.000151366	0.0136443
spz	867.908	0.467993	0.114758	4.07809	4.5408e-05	0.00532106
CG17834	499.422	0.460132	0.148569	3.0971	0.00195427	0.0848175
CG11980	332.424	0.438103	0.140703	3.11367	0.00184777	0.0811977
CG11550	598.036	0.429684	0.138878	3.09395	0.00197508	0.0851951
jeb	14570.2	0.414112	0.131634	3.14593	0.00165561	0.0755883
CROT	805.177	0.413478	0.120485	3.43177	0.000599655	0.0360357
CG17193	806.701	0.409724	0.125761	3.25796	0.00112218	0.0571742
mod	1123.94	0.406241	0.0858746	4.73062	2.2383e-06	0.000425337
CG5721	460.108	0.388501	0.117827	3.29723	0.000976429	0.0516186
ome	5244.93	0.387583	0.0854914	4.53359	5.79904e-06	0.00092666
CG13185	1921.91	0.387534	0.102597	3.77724	0.000158575	0.0141132
ClpP	594.3	0.387225	0.126928	3.05074	0.00228281	0.0905054
CG9837	1607.05	0.386448	0.105985	3.64625	0.0002661	0.0203364
subdued	1556.94	0.386429	0.0932814	4.14262	3.43365e-05	0.00431107
Baldspot	6959.4	0.380872	0.113413	3.35827	0.000784309	0.0444716
slf	2369.07	0.379602	0.119236	3.18362	0.00145444	0.0710151
CG10939	1005.13	0.378742	0.119547	3.16815	0.00153414	0.0729479
Ns4	654.162	0.374465	0.123207	3.03932	0.00237115	0.0931373
per	2417.15	0.37379	0.0909577	4.10949	3.96529e-05	0.00489122
Cdc7	1127.83	0.373503	0.123048	3.03542	0.00240204	0.0933081
pit	581.127	0.372781	0.12136	3.0717	0.00212845	0.0885509
bark	1382.69	0.372386	0.113704	3.27504	0.00105647	0.0546179
CG10055	590.058	0.368415	0.104018	3.54182	0.000397371	0.0273913
Pmp70	4991.49	0.356627	0.098186	3.63216	0.000281059	0.0210226
sty	5718.5	0.355886	0.100749	3.5324	0.000411807	0.0281108
Pu	2818.92	0.337245	0.09685	3.48214	0.000497421	0.0323831
CG12746	965.763	0.334445	0.103358	3.2358	0.001213	0.0613571
CG32425	4684.22	0.331851	0.0921134	3.60263	0.000315011	0.0233141
aop	3934.21	0.327009	0.0978743	3.34111	0.00083444	0.0461964
l(3)77CDf	2706.42	0.3178	0.092576	3.43286	0.000597254	0.0360357
CG13784	8741.89	0.312573	0.0750225	4.16639	3.09465e-05	0.00402935
eIF1A	4835.69	0.303485	0.0984474	3.08272	0.00205121	0.0867127
msk	2275.9	0.301209	0.0746184	4.03667	5.4216e-05	0.00586451
Arpc2	939.045	0.292144	0.092465	3.15951	0.00158036	0.0735859
Dmtn	7168.23	0.290143	0.088867	3.26491	0.00109499	0.056196
Keap1	948.364	0.285007	0.0939731	3.03286	0.00242251	0.093586
Trp1	2771.06	0.282797	0.0934467	3.02629	0.00247572	0.0951191
AANAT1	4289.68	0.27954	0.0808184	3.45887	0.000542451	0.033752
raw	5089.13	0.277294	0.0799881	3.46669	0.000526907	0.0333756
Arf79F	4688.72	0.270446	0.0761977	3.54927	0.000386306	0.0268922
Tsp42Ee	2850.42	0.270094	0.0876927	3.08001	0.00206995	0.0867127
crb	6122.99	0.261863	0.0698617	3.74831	0.00017803	0.0152383
Dp1	8616.21	0.246839	0.0659128	3.74494	0.000180437	0.0152383
Tudor-SN	2820.25	0.246492	0.0741854	3.32264	0.000891685	0.0482264
Moe	10576.5	0.227515	0.0709815	3.20527	0.00134935	0.0668121
svr	9625.78	0.225497	0.0585275	3.85283	0.000116758	0.0114018
chb	4308.56	0.225071	0.0737497	3.05182	0.00227459	0.0905054
dom	9485.57	0.179003	0.0592519	3.02106	0.00251895	0.0957336

## Sheet: 1h-AT MB TRG
	baseMean	log2FoldChange	lfcSE	stat	pvalue	padj
tobi	13366.6	-2.17187	0.274194	-7.92093	2.35741e-15	8.28748e-12
Dr	840.401	-1.55366	0.287825	-5.39793	6.74144e-08	2.36995e-05
CG16898	786.948	-1.21216	0.203283	-5.9629	2.47802e-09	1.74229e-06
CG31075	1603.2	-1.16956	0.183091	-6.38789	1.68192e-10	1.4782e-07
lectin-28C	592.532	-1.06442	0.295713	-3.59949	0.000318842	0.0233518
alpha-Est2	350.043	-1.0242	0.204187	-5.01598	5.27635e-07	0.000119671
CG31689	9192.22	-0.99844	0.218122	-4.57745	4.70688e-06	0.000787954
Galk	3953.06	-0.887161	0.176294	-5.03227	4.84696e-07	0.000113597
Sodh-1	5052.85	-0.877123	0.200698	-4.37037	1.24035e-05	0.00185552
CG7135	859.781	-0.839664	0.175132	-4.79447	1.63105e-06	0.000337567
CG13318	215.234	-0.828446	0.233224	-3.55214	0.000382109	0.0268661
CG8745	1300.99	-0.804133	0.121563	-6.61494	3.71707e-11	3.93285e-08
bgm	2783.19	-0.790491	0.164881	-4.79431	1.63238e-06	0.000337567
Kr-h1	5145.39	-0.748544	0.128335	-5.83272	5.45294e-09	2.9492e-06
CG18302	361.499	-0.744768	0.202752	-3.6733	0.000239435	0.0189154
gt	353.303	-0.734977	0.145381	-5.05553	4.29189e-07	0.000104056
CG3699	1601.29	-0.714212	0.227853	-3.13453	0.0017213	0.076598
hgo	406.229	-0.706366	0.180193	-3.92005	8.85301e-05	0.00919761
CG3999	845.061	-0.696773	0.220451	-3.16067	0.00157405	0.0735859
Got2	5247.02	-0.685996	0.141663	-4.84247	1.28236e-06	0.000281759
Esp	207.258	-0.659398	0.207826	-3.17284	0.00150958	0.0726976
Cyp6g1	4157.4	-0.63257	0.20629	-3.06641	0.00216644	0.0893105
CG6654	524.31	-0.630014	0.198284	-3.17734	0.00148635	0.0720725
CG3270	559.551	-0.627168	0.147483	-4.25248	2.11416e-05	0.00297293
shams	155.913	-0.614066	0.201297	-3.05055	0.00228425	0.0905054
PNPase	201.868	-0.608808	0.155352	-3.9189	8.89543e-05	0.00919761
bmm	3377.52	-0.577363	0.151099	-3.82109	0.000132865	0.012624
CG5793	650.666	-0.573677	0.162731	-3.52531	0.000422985	0.0285962
Hpd	3243.29	-0.572951	0.150276	-3.81266	0.00013748	0.0128381
NC2alpha	332.632	-0.556285	0.143548	-3.87525	0.000106516	0.0106987
CG6511	512.848	-0.526468	0.129412	-4.06815	4.73881e-05	0.00546206
CG9849	302.561	-0.522272	0.166276	-3.14099	0.00168379	0.076379
CG10936	1360.03	-0.517153	0.138177	-3.7427	0.000182054	0.0152383
CG11241	728.653	-0.513262	0.136812	-3.75158	0.000175727	0.0152383
Clk	2667.25	-0.492884	0.149741	-3.29158	0.000996254	0.0522736
GstZ2	905.997	-0.488775	0.119652	-4.08498	4.40806e-05	0.00525307
UGP	3342.69	-0.479151	0.156317	-3.06524	0.00217493	0.0893105
CG15522	336.914	-0.475005	0.1429	-3.32403	0.000887266	0.0482264
Got1	4227.15	-0.461778	0.0980216	-4.71098	2.46525e-06	0.00044444
CG9098	469.939	-0.447658	0.125004	-3.58116	0.000342074	0.0245421
CG7368	842.304	-0.431874	0.126325	-3.41876	0.00062907	0.0368583
Stip1	1318.3	-0.41511	0.11383	-3.64676	0.000265563	0.0203364
Rnb	643.9	-0.409454	0.0981197	-4.17301	3.00606e-05	0.00398785
Tbc1d15-17	742.038	-0.393352	0.0822604	-4.7818	1.73737e-06	0.000349012
AcCoAS	19108.7	-0.370073	0.0974974	-3.79572	0.000147216	0.0134426
Gcn2	905.646	-0.365109	0.0893264	-4.08736	4.36315e-05	0.00525307
Herp	1410.17	-0.355498	0.0963311	-3.69038	0.000223919	0.0178906
Hsp83	16545.6	-0.350194	0.100287	-3.49191	0.000479587	0.0318111
CG7065	1619.92	-0.349266	0.101371	-3.44543	0.000570159	0.0351648
Gpdh1	10888.6	-0.34667	0.110023	-3.1509	0.00162769	0.074908
CG10077	47650.6	-0.344709	0.0915655	-3.76461	0.000166809	0.0146604
Stat92E	14257	-0.339446	0.0910363	-3.72869	0.000192479	0.0159214
Gnf1	721.701	-0.32608	0.0940546	-3.46692	0.00052645	0.0333756
PRAS40	2230.9	-0.313461	0.0923004	-3.39609	0.000683556	0.039591
Nop17l	2887.44	-0.303205	0.0780107	-3.88672	0.000101609	0.0103539
DnaJ-1	3216.38	-0.256767	0.0849267	-3.02339	0.00249957	0.0955134
CG5726	1571.88	-0.230119	0.0718413	-3.20316	0.00135929	0.0668333
Hsc70Cb	3977.64	-0.211756	0.0675257	-3.13593	0.00171311	0.076598

## Sheet: 7h-AT MB TIG
	baseMean	log2FoldChange	lfcSE	stat	pvalue	padj
snoRNA:Psi28S-3342	827.644	2.58213	0.67671	3.81571	0.000135794	0.0207407
snRNA:U2:34ABa	1011.83	2.10208	0.681406	3.08492	0.00203607	0.0702567
dsb	4315.79	0.996396	0.239236	4.16492	3.11464e-05	0.00951441
CG8654	897.115	0.949019	0.191219	4.96299	6.9417e-07	0.000699008
AkhR	630.113	0.725896	0.242231	2.99671	0.00272908	0.0812285
Mip	669.212	0.605531	0.166795	3.63038	0.000283002	0.0278397
CG5958	954.895	0.577374	0.186872	3.08968	0.00200369	0.0700567
Lgr1	1201.19	0.561791	0.134489	4.17723	2.9508e-05	0.00951441
Phk-3	424.693	0.544636	0.162121	3.35944	0.000781009	0.0472185
Jabba	1831.73	0.532339	0.175389	3.0352	0.00240377	0.0778087
CG6126	1554.75	0.521478	0.151306	3.44652	0.000567866	0.0429227
Rx	462.104	0.494173	0.140604	3.51463	0.000440367	0.0359985
Gk2	1326.67	0.466448	0.132447	3.52177	0.000428684	0.0358505
Akr1B	2996.18	0.463735	0.125515	3.69467	0.000220175	0.0260795
AstA	590.945	0.415599	0.140768	2.95236	0.00315357	0.087584
CG4577	16135.9	0.399327	0.0948321	4.21088	2.54374e-05	0.00868461
CG6356	1486.56	0.397843	0.133025	2.99074	0.00278304	0.0820412
Jafrac1	2412.9	0.396864	0.126488	3.13756	0.00170358	0.0633821
CG13579	2413.7	0.383367	0.122087	3.14012	0.00168876	0.0633821
DAT	826.143	0.369377	0.11577	3.19062	0.0014197	0.0587434
Pli	6889.18	0.364894	0.0974636	3.7439	0.000181187	0.0236317
kn	607.852	0.347967	0.119695	2.90711	0.00364787	0.0940987
nvy	1421.39	0.325986	0.102694	3.17434	0.0015018	0.0601133
CG8034	2698.58	0.312532	0.108387	2.88348	0.0039331	0.0992509
dpr4	2576.5	0.296722	0.0942843	3.1471	0.00164901	0.062966
GABA-B-R3	2619.94	0.296712	0.0996045	2.9789	0.00289288	0.0835337
CG13743	4548.91	0.29076	0.0883277	3.29183	0.000995385	0.0505848
CG6123	3273.63	0.287989	0.0931381	3.09206	0.0019877	0.0700567
Ppcs	3936.74	0.266957	0.08753	3.04989	0.00228923	0.0759239
robo3	4110.18	0.261445	0.0897455	2.91318	0.0035777	0.0931164
Dcr-2	1825.43	0.259997	0.0860523	3.02138	0.00251625	0.0780978
CG1358	4515.41	0.252387	0.0771861	3.26986	0.00107602	0.0505848
CoRest	2662.38	0.247771	0.0696238	3.55871	0.000372681	0.033037
ZnT63C	2479.63	0.232128	0.079007	2.93807	0.00330266	0.0884727
CG14762	14073.7	0.229702	0.0695531	3.30254	0.00095814	0.0505848
Ndae1	10445.6	0.228133	0.0754434	3.02389	0.00249546	0.0780978
Ten-m	27146.3	0.223248	0.0700301	3.18789	0.00143314	0.0587434
Drat	4771.76	0.177591	0.0595775	2.98084	0.00287461	0.0834211
spg	4887.21	0.176716	0.0615149	2.87274	0.00406931	0.0995763

## Sheet: 7h-AT MB TRG
	baseMean	log2FoldChange	lfcSE	stat	pvalue	padj
TotM	310.619	-2.19789	0.700234	-3.13879	0.00169649	0.0633821
CG9297	9181.82	-1.39412	0.417782	-3.33694	0.00084706	0.0493578
Act87E	1942.51	-1.2455	0.390386	-3.19044	0.00142057	0.0587434
Hsc70-1	488.454	-1.2217	0.346383	-3.52702	0.000420262	0.0358505
CG5023	1001.47	-1.21359	0.372468	-3.25825	0.00112102	0.0516191
Prm	4273.39	-1.17792	0.307164	-3.83483	0.000125654	0.0202582
Mlc2	6626.92	-1.15602	0.281345	-4.10888	3.97575e-05	0.0104887
Mlc1	1869.32	-1.14029	0.265698	-4.29167	1.77337e-05	0.00686178
Hpd	3243.29	-1.1103	0.151167	-7.34481	2.06055e-13	1.19594e-09
CG3630	1054.12	-1.10349	0.297524	-3.70891	0.000208153	0.0251692
CG43897	9857.32	-1.07577	0.320034	-3.36143	0.000775391	0.0472185
tn	2478.04	-1.05354	0.282029	-3.73556	0.000187295	0.0236317
wupA	3676.86	-1.0305	0.27765	-3.71149	0.000206046	0.0251692
CG5966	1529.32	-1.0301	0.251828	-4.09048	4.30482e-05	0.0108631
sqa	1477.05	-1.0293	0.270902	-3.79951	0.000144981	0.0207918
up	5246.48	-1.01975	0.310842	-3.28059	0.00103589	0.0505848
CG45076	1583.67	-1.01365	0.262527	-3.86115	0.000112856	0.0192652
Mlp60A	1500.15	-0.990342	0.295591	-3.35038	0.000807	0.0482869
CG14964	443.351	-0.987402	0.312153	-3.1632	0.00156047	0.0606561
Mp20	2269.33	-0.979211	0.297481	-3.29167	0.000995944	0.0505848
PGRP-SB1	1242.71	-0.971481	0.336566	-2.88645	0.00389614	0.0987476
Tm2	3395.89	-0.965178	0.280263	-3.44383	0.000573545	0.0429227
Dr	840.401	-0.96166	0.285215	-3.3717	0.000747059	0.0472185
CG6910	7670.87	-0.957001	0.163024	-5.87032	4.34955e-09	8.41494e-06
CG4000	802.648	-0.947605	0.286957	-3.30225	0.00095911	0.0505848
Pkcdelta	1816.35	-0.929674	0.271874	-3.4195	0.000627371	0.0438706
CG10621	1677.41	-0.926718	0.218217	-4.24677	2.16876e-05	0.00786719
UQCR-Q	2544.35	-0.919066	0.251781	-3.65025	0.00026198	0.0273546
CG14687	1140.4	-0.918918	0.153354	-5.99213	2.07106e-09	6.01023e-06
l(2)01289	2434.01	-0.894157	0.267486	-3.34281	0.000829341	0.0491173
Mhc	33961.2	-0.868932	0.288078	-3.01631	0.00255868	0.0787611
CG42390	2849.57	-0.864037	0.190119	-4.54471	5.50107e-06	0.00319282
Nlg1	771.463	-0.863282	0.251288	-3.43542	0.000591629	0.0429227
CG14688	886.55	-0.855495	0.191393	-4.46983	7.82827e-06	0.00349502
CG5597	826.181	-0.838205	0.185451	-4.51982	6.18914e-06	0.00326561
FipoQ	283.049	-0.832459	0.284088	-2.93029	0.00338647	0.0901608
CG7296	606.592	-0.829113	0.20081	-4.12884	3.64605e-05	0.0101099
LUBEL	2784.06	-0.807451	0.245531	-3.2886	0.00100688	0.0505848
sls	53261	-0.806351	0.280796	-2.87166	0.00408325	0.0995763
CG11089	4339.96	-0.774454	0.157037	-4.93167	8.15297e-07	0.000699008
bmm	3377.52	-0.767784	0.150936	-5.08682	3.64117e-07	0.000528334
RpS9	4485.8	-0.757391	0.212145	-3.57016	0.000356757	0.0323534
CG33110	1463.1	-0.750464	0.223218	-3.36202	0.000773744	0.0472185
Asph	1119.73	-0.742698	0.244673	-3.03547	0.00240159	0.0778087
CG3036	9081.43	-0.741758	0.160439	-4.6233	3.77687e-06	0.00243566
Nmdmc	1826.44	-0.730092	0.199485	-3.65988	0.000252331	0.0273546
ND-MWFE	478.818	-0.722535	0.220461	-3.27737	0.00104778	0.0505848
CG44085	4095.6	-0.715917	0.208207	-3.43849	0.000584973	0.0429227
TpnC25D	949.318	-0.712655	0.202332	-3.52221	0.000427963	0.0358505
CG34396	322.587	-0.710492	0.219938	-3.23043	0.00123605	0.0547638
RpS28b	5968.91	-0.70852	0.222311	-3.18707	0.00143721	0.0587434
CG8468	3658.36	-0.690465	0.18468	-3.7387	0.000184972	0.0236317
CG42319	1051.03	-0.679144	0.174645	-3.88872	0.000100772	0.0177237
RpS27	4626.9	-0.672998	0.184466	-3.64835	0.000263932	0.0273546
CG31313	2461.4	-0.672062	0.213692	-3.14501	0.00166083	0.0630032
Wnt6	472.848	-0.668525	0.208554	-3.20553	0.00134813	0.0575335
Actn	4338.35	-0.66796	0.207367	-3.22115	0.00127678	0.0557174
ND-B18	861.49	-0.663351	0.206449	-3.21316	0.00131285	0.0564429
h	2267.75	-0.649889	0.177145	-3.66868	0.000243809	0.0273546
RpS21	2331.94	-0.647333	0.222111	-2.91445	0.00356314	0.0931164
hgo	406.229	-0.647164	0.180892	-3.57762	0.000346739	0.031944
bgm	2783.19	-0.647074	0.165593	-3.90762	9.32096e-05	0.0169059
RpS16	4743.53	-0.635322	0.161315	-3.93839	8.20287e-05	0.0158698
CG44245	1389.76	-0.630804	0.14261	-4.42327	9.72187e-06	0.00403041
pug	7731.29	-0.628018	0.170295	-3.68781	0.000226192	0.0262564
Strn-Mlck	8159.56	-0.625472	0.212502	-2.94336	0.00324666	0.0880544
yellow-c	315.568	-0.62382	0.188045	-3.3174	0.000908598	0.0505848
CG9034	478.815	-0.623016	0.166154	-3.74962	0.000177101	0.0236317
RpL24	7034.47	-0.620333	0.154262	-4.02131	5.78765e-05	0.0127427
RpS15	8755.99	-0.618352	0.207916	-2.97405	0.00293902	0.0844458
RpS20	3611.78	-0.613179	0.190205	-3.22377	0.00126514	0.0556277
zormin	9130.62	-0.612313	0.161292	-3.79629	0.000146875	0.0207918
ATPsynE	2160.56	-0.611712	0.182051	-3.36012	0.000779094	0.0472185
RpS23	6671.01	-0.611429	0.186494	-3.27855	0.0010434	0.0505848
eEF1beta	2823.29	-0.610974	0.176513	-3.46137	0.000537442	0.0426924
RpL31	6350.57	-0.605779	0.178151	-3.40037	0.000672942	0.0457333
RpL32	4883.25	-0.592479	0.153946	-3.84862	0.000118785	0.019698
Zasp52	7257.34	-0.590179	0.180197	-3.27519	0.00105591	0.0505848
CG1674	2324.21	-0.580946	0.193692	-2.99933	0.00270572	0.0809486
ND-B12	1111.8	-0.575119	0.189826	-3.02972	0.00244777	0.0778087
RpL14	6119.38	-0.573514	0.167397	-3.42608	0.000612371	0.0433439
dob	662.121	-0.571886	0.189222	-3.02231	0.00250853	0.0780978
Prps	8182.77	-0.570519	0.115838	-4.92513	8.43049e-07	0.000699008
Npl4	2598.09	-0.570425	0.194137	-2.93826	0.00330055	0.0884727
RpL38	1431.95	-0.565764	0.172711	-3.27578	0.0010537	0.0505848
COX5A	4696.83	-0.559012	0.164489	-3.39847	0.000677646	0.0457333
CG18003	1030.24	-0.556488	0.181549	-3.06522	0.00217511	0.0738267
ATPsynF	3892.45	-0.553451	0.173885	-3.18285	0.00145832	0.0587785
RpL27A	6765.13	-0.550862	0.169399	-3.25186	0.00114651	0.0516191
RpL34a	1055.63	-0.535004	0.168857	-3.16839	0.00153286	0.0605218
RpL19	8524.27	-0.533281	0.154401	-3.45388	0.00055259	0.0427631
RpL23	6448.77	-0.532234	0.17495	-3.04222	0.00234843	0.0774449
RpLP2	6263.21	-0.529874	0.171841	-3.08351	0.00204572	0.0702567
RpL23A	10257.2	-0.528352	0.158386	-3.33584	0.000850411	0.0493578
RpS3	7844.2	-0.525104	0.157635	-3.33115	0.000864883	0.0497008
eEF1alpha1	64174.4	-0.523862	0.173175	-3.02504	0.00248597	0.0780978
levy	3916.04	-0.519752	0.180392	-2.88124	0.00396111	0.0992836
Kr-h1	5145.39	-0.51922	0.128413	-4.04335	5.26926e-05	0.0122331
RpL34b	3437	-0.51513	0.157324	-3.27433	0.00105912	0.0505848
RpS11	5523.22	-0.509966	0.167791	-3.0393	0.00237128	0.0777566
CG31326	1311.67	-0.507997	0.159388	-3.18718	0.00143668	0.0587434
RpS12	3139.65	-0.507918	0.162014	-3.13503	0.00171838	0.0635254
RpL24-like	1068.86	-0.505078	0.106245	-4.7539	1.99534e-06	0.00144762
RpS8	9833.84	-0.505004	0.143488	-3.51949	0.000432381	0.0358505
COX6B	5088.87	-0.504882	0.154463	-3.26862	0.00108072	0.0505848
Achl	3184.97	-0.504522	0.147185	-3.4278	0.000608492	0.0433439
Pax	3671.52	-0.50177	0.151947	-3.30227	0.000959059	0.0505848
CG17549	4320.09	-0.501365	0.132312	-3.78925	0.000151101	0.0208807
Tctp	8216.32	-0.498579	0.153334	-3.2516	0.00114759	0.0516191
RpL35	4373.78	-0.498478	0.146402	-3.40485	0.000662015	0.0457333
ATPsynO	2624.96	-0.497157	0.14674	-3.388	0.000704034	0.0469679
SdhB	3366.5	-0.496556	0.126853	-3.91442	9.06203e-05	0.0169059
LTV1	1979.86	-0.496113	0.12018	-4.12809	3.65797e-05	0.0101099
RpS14a	4068.19	-0.495865	0.160313	-3.09311	0.00198071	0.0700567
Non1	4889.33	-0.489481	0.108862	-4.49633	6.91357e-06	0.00334387
GNBP2	624.504	-0.488754	0.149493	-3.26941	0.00107774	0.0505848
CG31937	952.468	-0.485169	0.16711	-2.90329	0.00369262	0.0944138
CG44242	384.072	-0.478197	0.161925	-2.9532	0.00314501	0.087584
Dlc90F	611.722	-0.477721	0.146976	-3.25033	0.00115271	0.0516191
CG5001	1119.56	-0.477483	0.146368	-3.2622	0.0011055	0.0513305
RpS30	4691.24	-0.472316	0.154513	-3.05681	0.00223705	0.0749259
ND-B14.5B	939.715	-0.471864	0.149214	-3.16234	0.00156508	0.0606561
RpL13	6539.63	-0.468108	0.146305	-3.19952	0.00137655	0.0583174
RpL18A	6011.54	-0.465733	0.138308	-3.36736	0.00075891	0.0472185
RpS17	5208.71	-0.46444	0.153168	-3.03223	0.00242754	0.0778087
RpS18	5633.25	-0.463901	0.157287	-2.94939	0.00318405	0.087584
CG17202	332.408	-0.456404	0.147841	-3.08713	0.002021	0.0702388
RpL37a	5565.97	-0.452626	0.15324	-2.9537	0.00313989	0.087584
galla-1	486.504	-0.445083	0.128002	-3.47714	0.000506788	0.0408527
RpS14b	1394.24	-0.443475	0.140397	-3.15871	0.00158467	0.06091
RpL8	9670.28	-0.440331	0.12803	-3.43928	0.00058327	0.0429227
RpL17	5894.13	-0.439502	0.142026	-3.09453	0.00197127	0.0700567
RpS19a	5473.48	-0.43854	0.146149	-3.00064	0.00269415	0.0809486
CG4733	783.774	-0.433768	0.121961	-3.5566	0.000375679	0.033037
mino	2736.3	-0.432221	0.146515	-2.95002	0.00317753	0.087584
Neb-cGP	1324.65	-0.4312	0.142206	-3.03222	0.00242764	0.0778087
ND-18	1177.27	-0.427044	0.145031	-2.9445	0.0032348	0.0880544
RpL6	8391.04	-0.426965	0.147149	-2.90158	0.00371289	0.0945159
CG10550	1977.5	-0.425535	0.106881	-3.98138	6.85161e-05	0.0142024
eEF5	4782.25	-0.424136	0.136639	-3.10406	0.00190883	0.0689394
nrv1	3968.7	-0.421954	0.105077	-4.01566	5.92786e-05	0.0127427
RpL7A	9572.93	-0.421135	0.134692	-3.12665	0.00176812	0.0649505
CG43078	15608.9	-0.418957	0.110114	-3.80477	0.000141935	0.0207918
sta	9751.29	-0.417942	0.142787	-2.92703	0.00342221	0.0906963
GstD1	3877.77	-0.414933	0.114284	-3.63072	0.000282629	0.0278397
Cyt-c1	4447.57	-0.413912	0.133952	-3.09	0.00200156	0.0700567
RpL28	6017.36	-0.413099	0.141349	-2.92254	0.00347185	0.0915936
Vha13	2845.44	-0.412948	0.12848	-3.2141	0.00130856	0.0564429
ND-PDSW	1479.48	-0.412857	0.125188	-3.29788	0.000974162	0.0505848
CG9356	336.518	-0.412602	0.143383	-2.87762	0.00400684	0.0995706
RpLP0	9616.78	-0.410724	0.139194	-2.95073	0.0031702	0.087584
Chchd3	965.665	-0.407138	0.11154	-3.65014	0.000262097	0.0273546
ND-B14.5A	1291.45	-0.405535	0.140779	-2.88065	0.00396861	0.0992836
CG7394	309.34	-0.404064	0.138675	-2.91375	0.00357121	0.0931164
ND-20	1634.4	-0.403395	0.112309	-3.59184	0.000328353	0.0307381
CG32537	411.505	-0.403266	0.131203	-3.0736	0.00211495	0.072207
CG7778	1255	-0.399554	0.126366	-3.16187	0.00156761	0.0606561
RpL7	7199.41	-0.39837	0.120753	-3.29905	0.000970123	0.0505848
Sarm	16760	-0.397922	0.129921	-3.0628	0.00219277	0.0739932
modSP	1291.19	-0.390834	0.131625	-2.96931	0.00298469	0.0853356
CG4789	400.995	-0.387601	0.128532	-3.01559	0.00256476	0.0787611
Nacalpha	3313.37	-0.3829	0.110731	-3.45794	0.000544321	0.0426924
sog	3840.72	-0.378535	0.104791	-3.6123	0.000303499	0.0288772
scyl	12488.5	-0.376924	0.125565	-3.00183	0.00268365	0.0809486
eIF3g1	1414.33	-0.374484	0.117615	-3.18398	0.00145265	0.0587785
Mdh2	7708.03	-0.373462	0.110613	-3.37629	0.00073471	0.0472185
yps	4965.44	-0.365446	0.110795	-3.29841	0.000972332	0.0505848
CG4364	2057.19	-0.364042	0.123201	-2.95485	0.00312817	0.087584
aru	1259.01	-0.360755	0.123965	-2.91015	0.00361261	0.0936053
ex	1415.01	-0.360193	0.122358	-2.94376	0.00324255	0.0880544
CG10561	594.705	-0.355064	0.11977	-2.96454	0.00303134	0.0862446
Ras64B	749.143	-0.352321	0.0868868	-4.05494	5.01471e-05	0.0121272
Msr-110	27106.4	-0.351077	0.0960244	-3.65612	0.000256057	0.0273546
Argk	31269.6	-0.34947	0.1171	-2.98437	0.0028416	0.0828775
CG12814	1598.63	-0.342468	0.112079	-3.05558	0.00224623	0.0749259
Cyt-c-p	4765.62	-0.338689	0.109131	-3.10352	0.00191234	0.0689394
Adk1	1252.99	-0.338524	0.109	-3.10571	0.0018982	0.0689394
ND-23	1638.38	-0.338119	0.112401	-3.00816	0.00262835	0.0802892
Oda	15148	-0.332181	0.0981458	-3.38457	0.000712908	0.0470195
tacc	6066.06	-0.326224	0.082271	-3.96524	7.33222e-05	0.0146746
CG12091	3640.91	-0.318305	0.0873645	-3.64341	0.000269054	0.0273963
Usp47	6332.15	-0.317005	0.0830561	-3.81676	0.000135217	0.0207407
CG14207	3402.88	-0.316771	0.0940215	-3.36914	0.000754036	0.0472185
Idh3a	5086.66	-0.30636	0.106485	-2.87703	0.00401439	0.0995706
Vps60	778.295	-0.29869	0.103948	-2.87346	0.00406008	0.0995763
Ns2	745.136	-0.296361	0.0906611	-3.26888	0.00107972	0.0505848
pAbp	31482.6	-0.295556	0.0988807	-2.98901	0.00279879	0.0820412
kdn	12179.3	-0.288837	0.0953558	-3.02904	0.00245331	0.0778087
Ald1	30629.4	-0.284189	0.0856204	-3.31918	0.000902831	0.0505848
eIF1A	4835.69	-0.281236	0.097829	-2.87478	0.00404315	0.0995763
lost	6026.24	-0.275213	0.0833487	-3.30194	0.000960176	0.0505848
eIF3f1	2170.28	-0.272801	0.0912263	-2.99038	0.0027863	0.0820412
Ttd14	7971.45	-0.259831	0.0799608	-3.24947	0.00115618	0.0516191
Pect	4242.1	-0.258099	0.0714142	-3.61411	0.000301376	0.0288772
SP1029	1124.32	-0.255421	0.0869495	-2.93758	0.00330782	0.0884727
Letm1	4434.13	-0.251532	0.0762972	-3.29674	0.00097813	0.0505848
Mitofilin	3486.98	-0.240097	0.0800433	-2.9996	0.00270338	0.0809486
raw	5089.13	-0.231541	0.0797143	-2.90463	0.00367688	0.0944138
Marf	5952.82	-0.193205	0.0609103	-3.17195	0.00151416	0.0601932

## Sheet: 13h-AT MB TIG
	baseMean	log2FoldChange	lfcSE	stat	pvalue	padj
dsb	4315.79	1.22125	0.239749	5.09389	3.5079e-07	0.000353596
CG8654	897.115	0.756711	0.187276	4.04061	5.33124e-05	0.0214956

## Sheet: 13h-AT MB TRG
	baseMean	log2FoldChange	lfcSE	stat	pvalue	padj
CG7720	5419.39	-1.0684	0.261407	-4.08711	4.36787e-05	0.0195681
CG31324	3214.7	-0.986741	0.148005	-6.66696	2.61154e-11	8.1094e-08
MFS14	1587.85	-0.829355	0.196174	-4.22765	2.36142e-05	0.0136018
CG6145	2390.82	-0.828726	0.125503	-6.60325	4.02252e-11	8.1094e-08
CG10621	1677.41	-0.799616	0.220548	-3.62559	0.0002883	0.0968689
dsx	6136.9	-0.75607	0.215144	-3.51425	0.000441	0.0998946
cwo	7668.58	-0.700575	0.138996	-5.04027	4.6488e-07	0.00037488
Kr-h1	5145.39	-0.651855	0.127721	-5.10372	3.33033e-07	0.000353596
CG17211	991.601	-0.632841	0.17969	-3.52185	0.000428546	0.0998946
CG5059	2866.07	-0.566904	0.154276	-3.67462	0.000238205	0.0873128
IP3K2	2536.38	-0.556639	0.15473	-3.59749	0.000321303	0.0996534
AcCoAS	19108.7	-0.404897	0.0973389	-4.15967	3.18712e-05	0.0160631
CG12290	1570.94	-0.377244	0.107438	-3.51128	0.000445958	0.0998946
CG12541	1757.76	-0.329428	0.0931586	-3.5362	0.000405923	0.0998946
Pect	4242.1	-0.31109	0.0717778	-4.33407	1.4638e-05	0.00983676
Lmpt	8253.54	-0.282477	0.079027	-3.57444	0.000350974	0.0998946

[truncated: 2 more sheets: 19h-AT MB TIG, 19h-AT MB TRG]
