# Supplementary material for: A memory transcriptome time course reveals essential long-term memory transcription factors.
Source: Research Square preprint supplement (doi:10.21203/rs.3.rs-5746840/v1), 2025-01-08
Supplement: Supplementary file 9 [file ed69ff83c685208d1fae9a53.xlsx]

## Sheet: Hoja1
Croset et al (2018)	Dubnau et al (2019)	Jones et al (2018)
Ca-alpha1T	CG10019	lncRNA:CR32652
Eip93F	CG10096	lncRNA:CR45717
sNPF	CG10097	lncRNA:CR44522
CG5830	CG13743	Su(Ste):CR45795
Sytalpha	CG17193	lncRNA:CR40465
Bx	CG3009	Hsp70Bb
bol	CG32137	CR41504
CG3625	CG32647	CG14760
Rbp6	CARPB	CG34402
cmpy	CG33098	lncRNA:CR40341
CG34370	CG33934	CG40635
norpA	CG40228	MFS3
Hs3st-A	CG42655	TTLL3A
pros	CG43902	Os-C
qm	CG43980	CG43673
Fas2	CG44088	prt
trv	CG5897	Su(Ste):CR42414
Mef2	CG8765	CG10163
CG3625	CG8861	CG17570
mamo	cmet	GstD11
ab	Cyp9f3	Cyp4aa1
Pka-C3	dan	CG13055
Gstd11	dlp	lncRNA:CR44798
CG13055	Gfat1	Su(Ste):CR42425
CG33543	Indy-2	Su(Ste):CR45794
Imp	ItgaPS4	a10
fru	kuz	Lgr3
CG8641	Obp56a	Hr51
trio	Sgs4	CG15115
DAT	TkR86C	lncRNA:CR43648
per	Toll-6	lectin-21Cb
dpr3	tyn	lncRNA:CR45240
kek5	Apoltp	lncRNA:CR44944
beat-IV	beat-VII	CG17290
dpr17	Cfp1	CG8299
her	CG15431	PH4alphaNE1
DIP-gamma	DIP-kappa	Su(Ste):CR42432
ed	CG33144	lncRNA:CR40172
klg	CG33475	CR46188
5-HT1A	CG46339	CR45315
mAChR-A	CG6044	lncRNA:CR45369
mAChR-B	Gpo3	CG10357
Ilp1	dati	Ldh
Oamb	DOR	Su(Ste):CR42427
hec	dpr6	CG31810
Dh44-R1	Dyb	CG13618
	sotv	dysf
	GlcAT-P	lncRNA:CR46197
	Mct1	Gr98c
	Pvf3	CG33689
	SmydA-8	lncRNA:CR44598
	Syt12	CG2975
	Tb	CG33341
	AANATL2	vanin-like
	AcCoAS	Su(Ste):CR42412
	Ace	lncRNA:CR44597
	app	lncRNA:CR45266
	ATP8B	CG11353
	boil	Smyd4-1
	Ccn	CG43290
	CG11362	CG14356
	CG12355	Ir68a
	CG13325	Or67c
	CG1358	lncRNA:CR44595
	CG13594	lncRNA:CR43649
	CG14823	PH4alphaSG1
	CG15522	CG32204
	CG17364	ey
	CG18265	AOX4
	CG32814	Drsl2
	CG33284	Rgk1
	CG34030	org-1
	CG34041	CG30484
	CG3655	CG31371
	CG42322	Dop1R2
	CG42594	Obp83a
	CG43732	CG15213
	CG43742	lncRNA:CR44596
	CG43938	hec
	CG4582	Su(Ste):CR42415
	CG4829	CG13705
	CG6034	Or65a
	CG7768	CG2772
	Cyp4p1	Gr22f
	Cyp4p3	Su(Ste):CR42430
	Cyp6a2	CR46150
	Ddr	lncRNA:CR45055
	dnr1	Su(Ste):CR42426
	drl	bond
	Epac	asRNA:CR44703
	eys	lncRNA:CR46218
	Fili	CG30158
	fz3	TrxT
	His1:CG31617	CG3819
	His1:CG33813	unc
	hppy	Or35a
	igl	Ir8a
	ko	ppk9
	Lac	lncRNA:CR44663
	LRP1	lncRNA:CR44718
	Mp	CG6839
	msi	CG5065
	nAChRalpha7	CG43672
	NaPi-III	dac
	Ndae1	Lcp65Af
	nod	CG4115
	nuf	asRNA:CR45134
	oaf	ppk8
	PCB	hzg
	pigs	Su(Ste):CR42433
	PpN58A	lncRNA:CR45407
	rhea	lncRNA:CR45563
	saturn	CG17732
	smal	Elk
	Smurf	prage
	Sp7	asRNA:CR45912
	tok	sNPF
	tw	lncRNA:CR44126
	ymp	rpk
	Zasp67	CG6938
	ATPsynCF6L	CG11406
	bma	CG45544
	bru1	a
	CG11768	lncRNA:CR44276
	CG12541	CG17782
	CG12640	CG15043
	CG15097	CG18223
	CG15803	lncRNA:CR43945
	CG17010	Amt
	CG30325	rut
	CG32066	lcs
	CG32148	lncRNA:CR46260
	CG32683	CG31522
	CG34135	Sytalpha
	CG34354	Pen
	CG34357	CG34202
	CG34384	lncRNA:CR45388
	CG34425	CG9411
	CG42302	CG2839
	CG42329	CCKLR-17D1
	OtopLa	Tsp42En
	CG43445	CG12971
	CG4577	Su(Ste):CR42407
	CG46244	CG40198
	CG9171	Dgp-1
	CrebA	Nep1
	cwo	CG43366
	Dgk	GstE4
	frtz	ftz
	GluClalpha	Hr38
	hoe1	lncRNA:CR45541
	KCNQ	CG31041
	mld	Su(Ste):CR42439
	Mur82C	Dop1R1
	numb	CG14626
	ome	CG34219
	Ppa	ppk23
	Rbp	CG11835
	SPR	wat
	sprt	CG15480
	Sytbeta	CG9698
	unc-5	CG43337
	Vsx1	CG31523
	ZnT33D	CR45780
	2mit	eve
	br	upd3
	CG10738	lncRNA:CR44953
	CG11226	lncRNA:CR45920
	CG11883	CG15539
	CG12910	lncRNA:CR45522
	CG14811	Osi17
	CG2865	sals
	CG2898	Gr63a
	CG3088	PVRAP
	myd	CG11898
	CG31637	lncRNA:CR45973
	CG3222	rad
	CG32547	lncRNA:CR44445
	CG32982	CG30485
	CG33090	tRNA:Thr-CGT-1-2
	CG34273	CG34190
	CG42541	CG31191
	CG42784	Gadd45
	CG43078	Su(Ste):CR42422
	CG43373	Rsph3
	Stacl	lncRNA:CR43260
	CG43737	CG34286
	CG43759	Obp28a
	CG43843	Pka-R2
	CG4404	betaNACtes6
	CG4502	lncRNA:CR45562
	CG45263	lncRNA:CR45228
	CG46310	CG9313
	CG6006	bap
	CG8500	tRNA:Thr-CGT-1-3
	CG9932	CG14693
	crb	lncRNA:CR44750
	Cyp313a1	lbm
	Esyt2	CG3014
	Agpat2	CG18213
	Gyc88E	CCKLR-17D3
	Ir56a	CG34458
	Irk1	fz
	ITP	CG8620
	l(2)k05819	lncRNA:alphagamma-element:CR32865
	l(2)k09913	Hey
	Lgr1	jdp
	Lmpt	Amyrel
	mbc	lncRNA:CR45482
	Octbeta3R	CG6749
	Pde6	lncRNA:CR45540
	Pde8	asRNA:CR45384
	Pi4KIIIalpha	nau
	Plc21C	Mst77Y-16Psi
	pxb	CG12866
	Rgk2	lncRNA:CR43144
	ssx	lncRNA:CR46208
	Task6	CG42339
	tipE	Oamb
	Tsp66E	CG44438
	Adhr	lncRNA:CR42790
	Calx	ppk17
	CG10384	CG42284
	CG11068	Dnai2
	CG11322	yl
	CG13252	lncRNA:CR42721
	CG13300	CR7448
	CG13579	Poxm
	CG13995	Cht2
	CG14441	Toll-9
	CG14669	CG15614
	CG30345	Ac78C
	CG31785	CG17780
	CG31910	Hsp70Bbb
	CG32333	CR41440
	CG33912	CG9826
	CG34260	sca
	CG42342	CG3823
	CG42788	lncRNA:CR45416
	Ca-Ma2d	CG31760
	CG43446	CG13921
	CG6231	toy
	CG8034	gprs
	CG8757	rk
	Cngl	Oseg2
	cno	frac
	dpr15	GlyT
	dpr16	mspo
	dpr8	Cpr67B
	Gr77a	Spn42Db
	klar	CG43861
	mGluR	Baldspot
	Mical	CG42402
	mtt	Myo81F
	nAChRalpha6	Pzl
	Or65c	CG31675
	osp	mub
	Piezo	CG32700
	px	CG8236
	rdgC	CG18420
	Sema2b	CG14692
	spri	lncRNA:CR45996
	tadr	CG3358
	Toll-7	CG6688
	zfh2	bru2
	CG13606	CG4324
	CG30440	pdm2
	CG44422	phyl
	Mocs1	CG7963
	CG1631	ADPS
	Cyp4p2	CR10102
	Hsc70-3	CG15459
	dcma	DJ-1alpha
	SKIP	Gsc
	CG11378	CG1136
	CG33639	lncRNA:CR44024
	Eaat1	Shawl
	Ets96B	Muc91C
	otp	CG12880
	bru3	Cks85A
	CG14459	ppk10
	CG18649	Rab27
	CG31323	5-HT1B
	CG43795	lncRNA:CR44513
	CG46301	Trpm
	CG8785	ppk15
	disco-r	nyo
	IA-2	CG7985
	ind	CG15239
	kek2	dl
	LUBEL	CG13054
	Mhc	CG11191
	Rab23	CG5326
	rn	Imp
	Ten-m	Octbeta1R
	Zasp52	lncRNA:CR43492
	CG11566	CG30271
	CG1503	lncRNA:CR45411
	CG15631	hpRNA:CR46342
	pre-lola-G	nerfin-1
	pre-mod(mdg4)-AD	CG34203
	pre-mod(mdg4)-Y	Pka-C1
	stg1	Bx
	wry	lncRNA:CR44347
	Tet	lncRNA:CR44150
	Octalpha2R	CR32745
		CG5535
		CG8888
		lncRNA:CR45669
		dpr5
		lncRNA:CR44537
		CG14565
		TwdlG
		Neurochondrin
		SIFaR
		CG30108
		CR43087
		lncRNA:CR45339
		Gfrl
		lncRNA:CR44125
		CG8248
		CG14866
		Antp
		CG8100
		CG33914
		lncRNA:CR45471
		CG11319
		asRNA:CR33945
		SP1173
		5-HT1A
		Cda9
		mAChR-B
		meng
		Hsp26
		Cad96Cb
		sls
		bt
		GluRIA
		CG32087
		C901
		lncRNA:CR44825
		lmd
		knrl
		Ku80
		Orct2
		lncRNA:CR44833
		GC
		CG8160
		net
		Mcm5
		TpnC73F
		Pgant9
		CG13676
		btsz
		CG6041
		GluRIB
		spz4
		CG13616
		CG13284
